# Supplementary material
Source: PubMed Central journal article supplement (PMC2766925)
Supplement: NIHMS146259-supplement-1_si_001.pdf [file NIHMS146259-supplement-1_si_001.pdf]

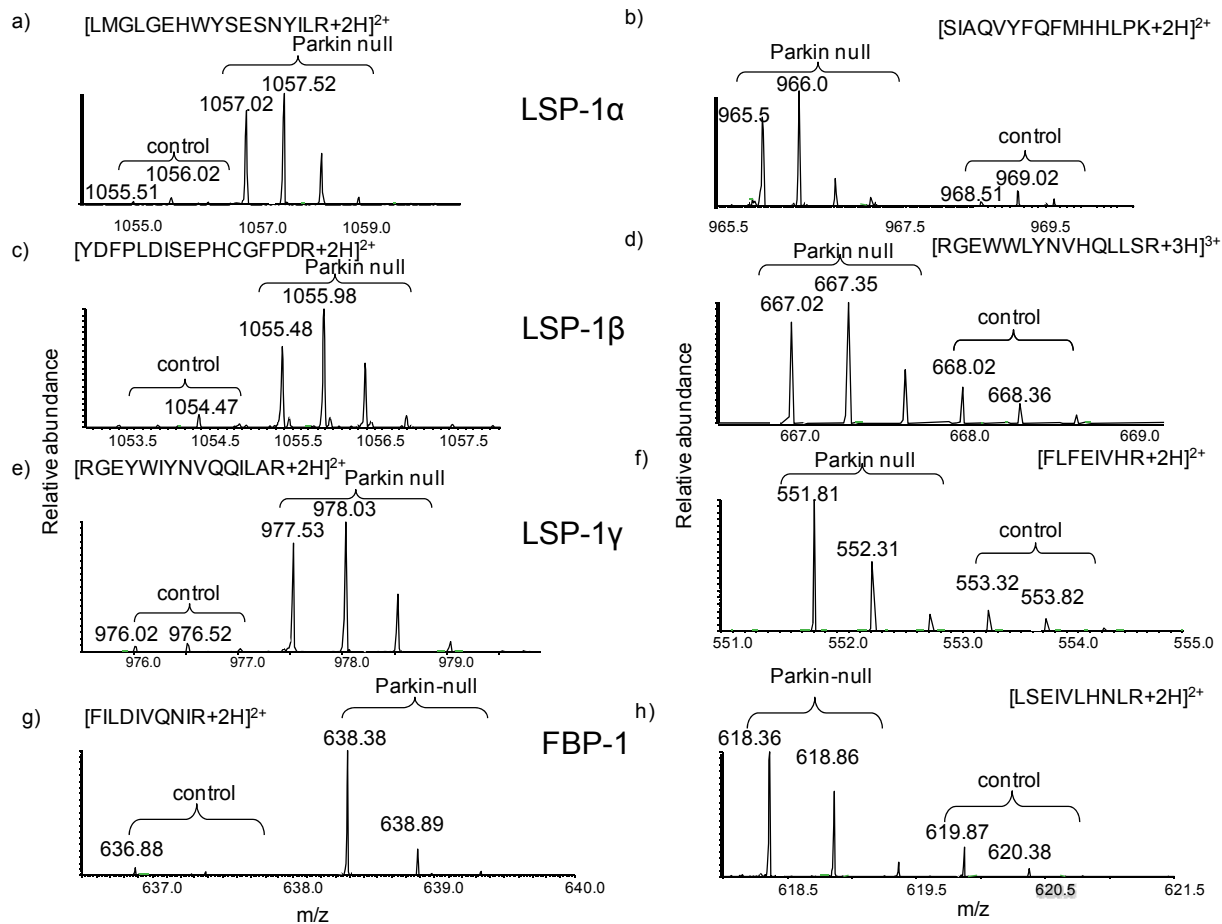

**Figure S1.** Example mass spectra of light- and heavy- labeled peptide pairs showing strong up-regulation of LSP-1 $\alpha$ , LSP-1 $\beta$ , LSP-1 $\gamma$ , and FBP-1 from both forward and reverse labeling experiments. a) [LMGLGEHWYSESNYILR+2H]<sup>2+</sup> and b) [SIAQVYFQFMHHLPK+2H]<sup>2+</sup> are peptides derived from LSP-1 $\alpha$ ; c) [YDFPLDISEPHCGFPDR+2H]<sup>2+</sup> and d) [RGEWWLYNVHQLLSR+3H]<sup>3+</sup> are peptides derived from LSP-1 $\beta$ ; e) [RGEYWIYNVQQILAR+2H]<sup>2+</sup> and f) [FLFEIVHR+2H]<sup>2+</sup> are peptides derived from LSP-1 $\gamma$ ; g) [FILDIVQNIR+2H]<sup>2+</sup> and h) [LSEIVLHNLR+2H]<sup>2+</sup> are peptides derived from FBP-1. a), c), e), and g) show peptides identified from the forward labeling experiment and b), d), f), and h) show peptides identified from the reverse labeling experiment.

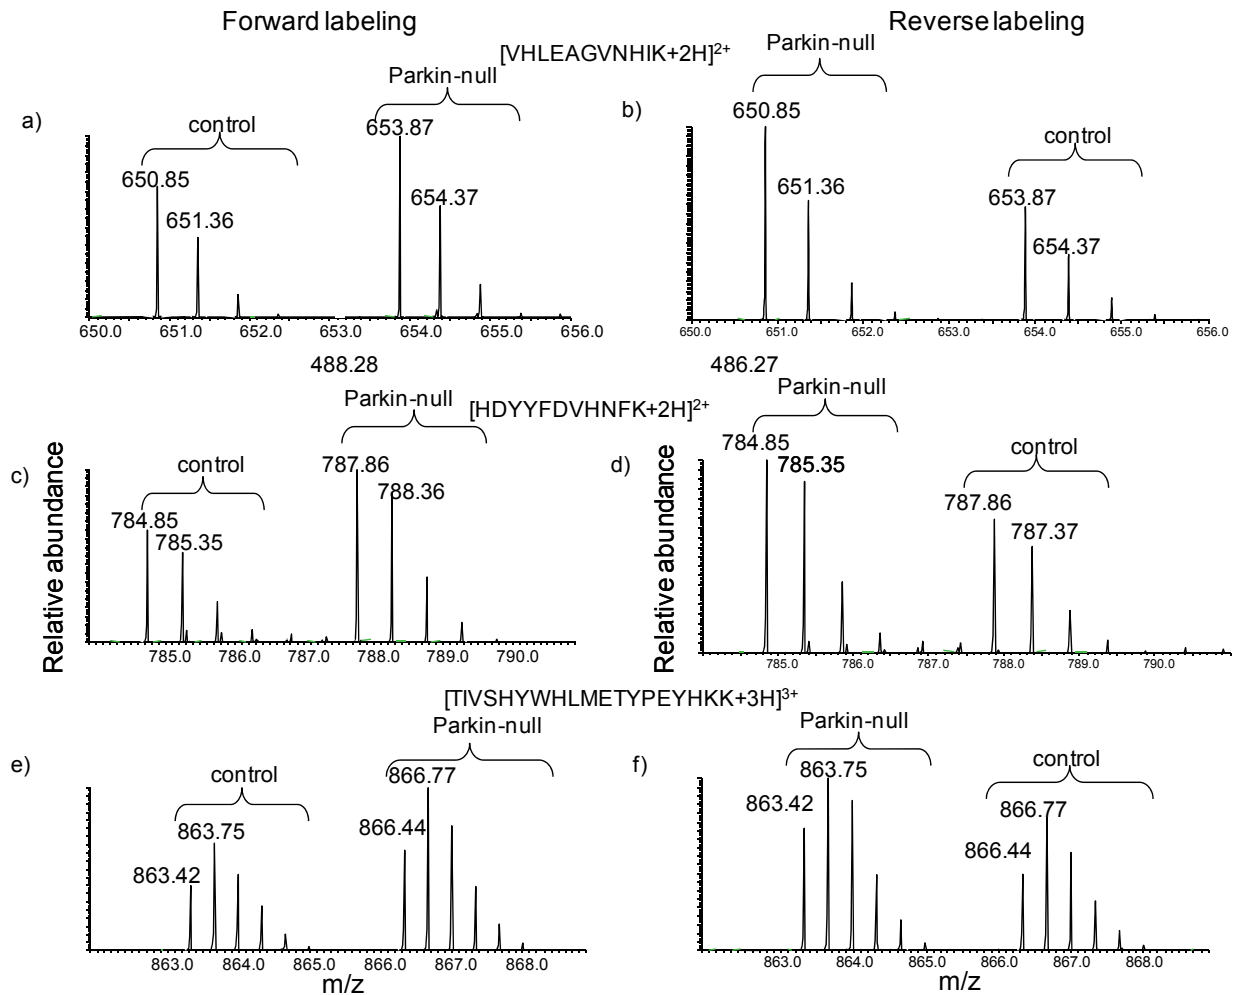

**Figure S2.** Example mass spectra of light- and heavy- labeled peptide pairs showing mild up-regulation of LSP-2 from both forward and reverse labeling experiments. a) and b) show doubly charged peptide ion  $[VHLEAGVNHK+2H]^{2+}$ ; c) and d) show doubly charged peptide ion  $[HDYYFDVHNFK+2H]^{2+}$ ; e) and f) show triply charged peptide ion  $[TIVSHYWHLMETYPEYHKK+3H]^{3+}$ . a), c), and e) show peptides identified from the forward labeling experiment; b), d), and f) show peptides identified from the reverse labeling experiment.
