# Supplementary material
Source: PubMed Central journal article supplement (PMC2766925)
Supplement: NIHMS146259-supplement-2_si_002.pdf [file NIHMS146259-supplement-2_si_002.pdf]

Table S4. Peptide identifications used for the relative quantification of proteins in *parkin* mutants relative to age-matched controls from both label-free and isotope labeling approaches.

| NCBI accession no. <sup>a</sup> | FlyBase ID <sup>b</sup> | Obs <sup>c</sup> | Mr(exp) <sup>c</sup> | Mr(cal) <sup>c</sup> | Delta <sup>c</sup> | Miss <sup>c</sup> | Score <sup>c</sup> | Expect <sup>c</sup> | Rank <sup>c</sup> | Peptide <sup>d</sup>            | Ratio (PD-like/control) or peak area <sup>e</sup> | Experiment <sup>f</sup> |
|---------------------------------|-------------------------|------------------|----------------------|----------------------|--------------------|-------------------|--------------------|---------------------|-------------------|---------------------------------|---------------------------------------------------|-------------------------|
| gi 8282                         | FBgn0000055             | 649.37           | 1296.73              | 1296.72              | 0.01               | 0                 | 41                 | 0.0037              | 1                 | K.AAVVNFTSSLAK.L                | 0.86                                              | F&H (1D-GIST)           |
| gi 7287844                      | FBgn0000055             | 694.03           | 2079.06              | 2079.05              | 0.01               | 0                 | 29                 | 0.08                | 1                 | K.LLAHPTQPSLACAENFVK.A          | 0.81                                              | R&L (1D-GIST)           |
| gi 7287844                      | FBgn0000055             | 646.35           | 1290.69              | 1290.68              | 0.01               | 0                 | 55                 | 0.00022             | 1                 | K.AAVVNFTSSLAK.L                | 0.71                                              | R&L (1D-GIST)           |
| gi 7287844                      | FBgn0000055             | 1040.54          | 2079.07              | 2079.05              | 0.03               | 0                 | 44                 | 0.0022              | 1                 | K.LLAHPTQPSLACAENFVK.A          | 0.99                                              | R&L (1D-GIST)           |
| gi 543797                       | FBgn0000064             | 1087.08          | 2172.14              | 2172.11              | 0.03               | 0                 | 61                 | 4.70E-05            | 1                 | R.IVPIVEPEVLDPGDHDLDR.A         | 1.11                                              | F&H (1D-GIST)           |
| gi 24650276                     | FBgn0000064             | 1216.11          | 2430.2               | 2430.19              | 0                  | 0                 | 42                 | 0.0034              | 1                 | K.GVVPLFGSEDEVTTQGLDDLAAR.C     | 1.32                                              | F&L (1D-GIST)           |
| gi 24650276                     | FBgn0000064             | 919.51           | 1837                 | 1836.99              | 0.01               | 1                 | 39                 | 0.0058              | 1                 | K.KNTPEEIALATVQALR.R            | 0.93                                              | F&L (1D-GIST)           |
| gi 24650276                     | FBgn0000064             | 834.46           | 1666.91              | 1666.89              | 0.02               | 0                 | 40                 | 0.0057              | 1                 | K.NTPEEIALATVQALR.R             | 1.10                                              | F&L (1D-GIST)           |
| gi 217318                       | FBgn0000064             | 1216.11          | 2430.21              | 2430.19              | 0.01               | 0                 | 31                 | 0.044               | 1                 | K.GVVPLFGSEDEVTTQGLDDLAAR.C     | 0.74                                              | R&L (1D-GIST)           |
| gi 217318                       | FBgn0000064             | 919.52           | 1837.02              | 1836.99              | 0.02               | 1                 | 40                 | 0.0036              | 1                 | K.KNTPEEIALATVQALR.R            | 1.20                                              | R&L (1D-GIST)           |
| gi 217318                       | FBgn0000064             | 834.46           | 1666.9               | 1666.89              | 0.01               | 0                 | 37                 | 0.012               | 1                 | K.NTPEEIALATVQALR.R             | 1.09                                              | R&L (1D-GIST)           |
| gi 217318                       | FBgn0000064             | 1085.56          | 2169.11              | 2169.1               | 0.02               | 0                 | 75                 | 1.70E-06            | 1                 | R.IVPIVEPEVLDPGDHDLDR.A         | 0.67                                              | R&L (1D-GIST)           |
| gi 24661348                     | FBgn0000116             | 547.33           | 1092.65              | 1092.64              | 0.01               | 1                 | 88                 | 7.40E-08            | 1                 | K.AKLEEVAAK.Y                   | 0.69                                              | F&H (1D-GIST)           |
| gi 24661348                     | FBgn0000116             | 759.45           | 1516.89              | 1516.88              | 0                  | 2                 | 31                 | 0.024               | 1                 | K.RLVTAVNEIEKR.V                | 0.77                                              | F&H (1D-GIST)           |
| gi 24661348                     | FBgn0000116             | 681.41           | 1360.8               | 1360.78              | 0.01               | 1                 | 73                 | 1.70E-06            | 1                 | R.LVTAVNEIEKR.V                 | 0.99                                              | F&H (1D-GIST)           |
| gi 24661348                     | FBgn0000116             | 607.82           | 1213.63              | 1213.62              | 0.02               | 0                 | 56                 | 0.00012             | 1                 | R.MGLTEFEAVK.E                  | 1.05                                              | F&H (1D-GIST)           |
| gi 24661348                     | FBgn0000116             | 893.47           | 1784.93              | 1784.91              | 0.02               | 0                 | 64                 | 2.70E-05            | 1                 | K.AVQQQLIDDFLKF.E               | 1.04                                              | F&L (1D-GIST)           |
| gi 24661348                     | FBgn0000116             | 880.92           | 1759.82              | 1759.8               | 0.02               | 0                 | 71                 | 2.70E-06            | 1                 | K.TFLVWCNEEDHLR.I               | 0.98                                              | F&L (1D-GIST)           |
| gi 24661348                     | FBgn0000116             | 702.38           | 1402.74              | 1402.72              | 0.02               | 0                 | 53                 | 0.00037             | 1                 | K.VSSTLSGLEGLK.G                | 1.15                                              | F&L (1D-GIST)           |
| gi 24661348                     | FBgn0000116             | 895.4            | 1788.79              | 1788.78              | 0.01               | 0                 | 52                 | 0.00013             | 1                 | R.GEHTAEGGVYDISNK.R             | 0.99                                              | F&L (1D-GIST)           |
| gi 24661348                     | FBgn0000116             | 926.99           | 1851.97              | 1851.96              | 0.02               | 0                 | 83                 | 2.90E-07            | 1                 | R.LGFLTFCPTNLGTTIR.A            | 1.03                                              | F&L (1D-GIST)           |
| gi 24661348                     | FBgn0000116             | 600.34           | 1198.66              | 1198.64              | 0.01               | 0                 | 57                 | 0.00014             | 1                 | R.LVTAVNEIEK.R                  | 0.82                                              | F&L (1D-GIST)           |
| gi 24661348                     | FBgn0000116             | 898.41           | 1794.81              | 1794.82              | -0.01              | 0                 | 47                 | 0.00028             | 1                 | R.GEHTAEGGVYDISNK.R             | 0.90                                              | R&H (1D-GIST)           |
| gi 24661348                     | FBgn0000116             | 1433.68          | 2865.35              | 2865.32              | 0.03               | 0                 | 70                 | 2.90E-06            | 1                 | K.HPASNFGDVSTFGNVDPNTNEYVISTR.V | 0.62                                              | R&L (1D-GIST)           |
| gi 24661348                     | FBgn0000116             | 893.47           | 1784.93              | 1784.91              | 0.02               | 0                 | 46                 | 0.0017              | 1                 | K.AVQQQLIDDFLKF.E               | 0.76                                              | R&L (1D-GIST)           |
| gi 24661348                     | FBgn0000116             | 880.91           | 1759.82              | 1759.8               | 0.02               | 0                 | 54                 | 0.00014             | 1                 | K.TFLVWCNEEDHLR.I               | 0.90                                              | R&L (1D-GIST)           |
| gi 24661348                     | FBgn0000116             | 702.37           | 1402.73              | 1402.72              | 0.01               | 0                 | 60                 | 6.90E-05            | 1                 | K.VSSTLSGLEGLK.G                | 0.65                                              | R&L (1D-GIST)           |
| gi 24661348                     | FBgn0000116             | 926.99           | 1851.97              | 1851.96              | 0.01               | 0                 | 70                 | 6.30E-06            | 1                 | R.LGFLTFCPTNLGTTIR.A            | 0.85                                              | R&L (1D-GIST)           |
| gi 24661348                     | FBgn0000116             | 600.34           | 1198.66              | 1198.64              | 0.01               | 0                 | 57                 | 0.00016             | 1                 | R.LVTAVNEIEK.R                  | 0.85                                              | R&L (1D-GIST)           |
| gi 24661348                     | FBgn0000116             | 678.39           | 1354.76              | 1354.75              | 0.01               | 1                 | 60                 | 6.20E-05            | 1                 | R.LVTAVNEIEKR.V                 | 0.89                                              | R&L (1D-GIST)           |
| gi 24661348                     | FBgn0000116             | 604.8            | 1207.59              | 1207.58              | 0.01               | 0                 | 77                 | 1.10E-06            | 1                 | R.MGLTEFEAVK.E                  | 0.79                                              | R&L (1D-GIST)           |
| gi 114211                       | FBgn0000121             | 600.83           | 1199.65              | 1199.64              | 0.01               | 0                 | 28                 | 0.084               | 1                 | K.VFQLATTYR.Y                   | 1.16                                              | F&H (1D-GIST)           |
| gi 114211                       | FBgn0000121             | 652.33           | 1302.64              | 1302.64              | 0                  | 0                 | 37                 | 0.014               | 1                 | K.TAATVQVSNNK.K                 | 0.79                                              | R&L (1D-GIST)           |
| gi 114211                       | FBgn0000121             | 724.9            | 1447.79              | 1447.77              | 0.01               | 0                 | 39                 | 0.0062              | 1                 | K.TFYLIPLAANNK.D                | 0.92                                              | R&L (1D-GIST)           |
| gi 127980                       | FBgn0000150             | 737.89           | 1473.77              | 1473.76              | 0.01               | 0                 | 38                 | 0.012               | 1                 | R.TFIMVKPDGVQR.G                | 0.70                                              | F&L (1D-GIST)           |

|             |             |         |         |         |      |   |     |          |   |                                      |       |               |
|-------------|-------------|---------|---------|---------|------|---|-----|----------|---|--------------------------------------|-------|---------------|
| gij127980   | FBgn0000150 | 777.38  | 1552.75 | 1552.74 | 0.01 | 0 | 32  | 0.028    | 1 | R.NIIHGSDAVESA EK.E                  | 0.69  | R&L (1D-GIST) |
| gij17981717 | FBgn0000261 | 1144.57 | 2287.13 | 2287.09 | 0.03 | 0 | 111 | 4.70E-10 | 1 | R.GPILLQDVNFLDEM SHFDR.E             | 1.10  | F&L (1D-GIST) |
| gij17981717 | FBgn0000261 | 723.06  | 2166.14 | 2166.12 | 0.03 | 0 | 47  | 0.00082  | 1 | R.LVQNIAGHLSNASQFLQER.A              | 1.39  | F&L (1D-GIST) |
| gij17981717 | FBgn0000261 | 667.32  | 1332.62 | 1332.62 | 0    | 0 | 51  | 0.00029  | 1 | K.NFTQVHADFGR.M                      | 0.87  | R&L (1D-GIST) |
| gij17981717 | FBgn0000261 | 1144.57 | 2287.12 | 2287.09 | 0.02 | 0 | 110 | 5.00E-10 | 1 | R.GPILLQDVNFLDEM SHFDR.E             | 0.69  | R&L (1D-GIST) |
| gij17981717 | FBgn0000261 | 723.05  | 2166.14 | 2166.12 | 0.02 | 0 | 54  | 0.0002   | 1 | R.LVQNIAGHLSNASQFLQER.A              | 1.18  | R&L (1D-GIST) |
| gij84914    | FBgn0000313 | 746.89  | 1491.76 | 1491.74 | 0.02 | 0 | 67  | 1.20E-05 | 1 | K.VFMLHMENTGLR.E                     | 0.78  | F&H (1D-GIST) |
| gij84914    | FBgn0000313 | 730.38  | 1458.74 | 1458.73 | 0.02 | 0 | 66  | 1.80E-05 | 1 | R.TFFDGNPIHTLR.E                     | 0.90  | F&L (1D-GIST) |
| gij84914    | FBgn0000313 | 1141.64 | 2281.27 | 2281.25 | 0.03 | 0 | 72  | 1.30E-06 | 1 | R.LLLTDNILSEIPYDALGPLK.S             | 1.00  | F&L (1D-GIST) |
| gij84914    | FBgn0000313 | 689.01  | 2064.01 | 2064    | 0.02 | 0 | 47  | 0.0013   | 1 | R.LHYFEYGCLDSLPHLR.S                 | 0.33  | R&H (1D-GIST) |
| gij84914    | FBgn0000313 | 761.42  | 2281.25 | 2281.25 | 0    | 0 | 43  | 0.0016   | 1 | R.LLLTDNILSEIPYDALGPLK.S             | 0.69  | R&L (1D-GIST) |
| gij84914    | FBgn0000313 | 745.38  | 1488.74 | 1488.72 | 0.01 | 0 | 60  | 6.70E-05 | 1 | K.VFMLHMENTGLR.E                     | 0.69  | R&L (1D-GIST) |
| gij84914    | FBgn0000313 | 1141.64 | 2281.27 | 2281.25 | 0.03 | 0 | 68  | 3.20E-06 | 1 | R.LLLTDNILSEIPYDALGPLK.S             | 0.84  | R&L (1D-GIST) |
| gij24652838 | FBgn0000556 | 1002.57 | 2003.12 | 2003.09 | 0.02 | 0 | 73  | 1.30E-06 | 1 | K.TLIDALDAILPPARPTDK.A               | 0.85  | F&L (1D-GIST) |
| gij24652838 | FBgn0000556 | 668.71  | 2003.11 | 2003.09 | 0.02 | 0 | 41  | 0.002    | 1 | K.TLIDALDAILPPARPTDK.A               | 0.77  | F&L (1D-GIST) |
| gij24652838 | FBgn0000556 | 1034.56 | 3100.65 | 3100.62 | 0.03 | 0 | 29  | 0.049    | 1 | K.SGDAAI VNLVPSKPLC VEA FQEF PPLGR.F | 0.65  | R&H (1D-GIST) |
| gij24652838 | FBgn0000556 | 1002.57 | 2003.12 | 2003.09 | 0.03 | 0 | 62  | 1.60E-05 | 1 | K.TLIDALDAILPPARPTDK.A               | 0.83  | R&L (1D-GIST) |
| gij24652838 | FBgn0000556 | 668.71  | 2003.11 | 2003.09 | 0.01 | 0 | 40  | 0.0026   | 1 | K.TLIDALDAILPPARPTDK.A               | 0.84  | R&L (1D-GIST) |
| gij21392248 | FBgn0000579 | 826.97  | 1651.92 | 1651.91 | 0.02 | 0 | 50  | 0.00052  | 1 | K.AVGHVNDTLGPELIK.A                  | 0.89  | F&H (1D-GIST) |
| gij21392248 | FBgn0000579 | 978.06  | 1954.11 | 1954.1  | 0.01 | 0 | 68  | 5.50E-06 | 1 | K.VNIGITV TESIAAHL LAK.K             | 0.82  | F&H (1D-GIST) |
| gij21392248 | FBgn0000579 | 671.37  | 1340.73 | 1340.72 | 0.01 | 0 | 79  | 8.20E-07 | 1 | K.EALNLISDAIAK.A                     | 0.79  | F&L (1D-GIST) |
| gij21392248 | FBgn0000579 | 903.97  | 1805.94 | 1805.93 | 0.01 | 0 | 109 | 8.30E-10 | 1 | R.AAVPSGASTGVHEALELR.D               | 1.10  | F&L (1D-GIST) |
| gij17137654 | FBgn0000579 | 823.95  | 1645.89 | 1645.87 | 0.02 | 0 | 47  | 0.0011   | 1 | K.AVGHVNDTLGPELIK.A                  | 1.04  | R&L (1D-GIST) |
| gij17137654 | FBgn0000579 | 671.37  | 1340.73 | 1340.72 | 0.01 | 0 | 81  | 5.60E-07 | 1 | K.EALNLISDAIAK.A                     | 1.13  | R&L (1D-GIST) |
| gij17137654 | FBgn0000579 | 975.05  | 1948.09 | 1948.06 | 0.02 | 0 | 51  | 0.00021  | 1 | K.VNIGITV TESIAAHL LAK.K             | 1.17  | R&L (1D-GIST) |
| gij17137654 | FBgn0000579 | 903.98  | 1805.94 | 1805.93 | 0.01 | 0 | 96  | 1.60E-08 | 1 | R.AAVPSGASTGVHEALELR.D               | 0.86  | R&L (1D-GIST) |
| gij24664085 | FBgn0000639 | 638.38  | 1274.75 | 1274.74 | 0.01 | 0 | 53  | 0.00021  | 1 | K.FILDIVQNIR.Q                       | 15.43 | F&H (1D-GIST) |
| gij24664085 | FBgn0000639 | 583.36  | 1164.7  | 1164.68 | 0.01 | 0 | 52  | 0.00021  | 1 | R.FPQHLLLP R.G                       | 9.60  | F&H (1D-GIST) |
| gij24664085 | FBgn0000639 | 619.87  | 1237.73 | 1237.72 | 0.01 | 0 | 57  | 6.80E-05 | 1 | R.LSEIVLHNLR.Q                       | 5.52  | F&H (1D-GIST) |
| gij24664085 | FBgn0000639 | 729.43  | 1456.85 | 1456.83 | 0.02 | 0 | 41  | 0.003    | 1 | R.QVESLIADVLLGR.L                    | 3.48  | F&H (1D-GIST) |
| gij24664085 | FBgn0000639 | 824.91  | 1647.81 | 1647.78 | 0.02 | 0 | 31  | 0.047    | 1 | K.LMTDDEILEMLQR.N                    | 7.39  | R&L (1D-GIST) |
| gij24664085 | FBgn0000639 | 794.41  | 1586.8  | 1586.78 | 0.02 | 0 | 32  | 0.041    | 1 | R.AMNPVMSILMPWR.E                    | 3.82  | R&L (1D-GIST) |
| gij24664085 | FBgn0000639 | 618.36  | 1234.71 | 1234.7  | 0.01 | 0 | 57  | 4.40E-05 | 1 | R.LSEIVLHNLR.Q                       | 5.10  | R&L (1D-GIST) |
| gij24664085 | FBgn0000639 | 727.92  | 1453.83 | 1453.81 | 0.01 | 0 | 46  | 0.00096  | 1 | R.QVESLIADVLLGR.L                    | 14.81 | R&L (1D-GIST) |
| gij8186     | FBgn0000667 | 630.86  | 1259.71 | 1259.7  | 0.01 | 0 | 33  | 0.032    | 1 | R.LASDLEWIR.R                        | 0.89  | F&H (1D-GIST) |
| gij8186     | FBgn0000667 | 872.44  | 1742.86 | 1742.84 | 0.02 | 0 | 76  | 1.30E-06 | 1 | K.IHQAVQESMIFENR.Y                   | 1.10  | F&L (1D-GIST) |
| gij8186     | FBgn0000667 | 776.36  | 1550.71 | 1550.7  | 0    | 1 | 75  | 9.30E-07 | 1 | R.GKEEMLQSQDFR.Q                     | 0.98  | F&L (1D-GIST) |
| gij8186     | FBgn0000667 | 729.4   | 1456.78 | 1456.77 | 0.01 | 0 | 65  | 2.40E-05 | 1 | R.VGWEQLLTSINR.N                     | 0.38  | F&L (1D-GIST) |
| gij8186     | FBgn0000667 | 748.37  | 1494.72 | 1494.7  | 0.01 | 0 | 47  | 0.00065  | 1 | K.AGTAIDNIEEDFR.N                    | 0.88  | R&H (1D-GIST) |

|             |             |         |         |         |      |   |    |          |   |                             |      |               |
|-------------|-------------|---------|---------|---------|------|---|----|----------|---|-----------------------------|------|---------------|
| gij18186    | FBgn0000667 | 630.86  | 1259.7  | 1259.7  | 0.01 | 0 | 35 | 0.019    | 1 | R.LASDLEWIR.R               | 0.96 | R&H (1D-GIST) |
| gij1070611  | FBgn0000667 | 613.29  | 1836.84 | 1836.84 | 0    | 1 | 42 | 0.002    | 1 | K.KHEAFESDLAAHQDR.V         | 0.88 | R&L (1D-GIST) |
| gij18186    | FBgn0000667 | 872.43  | 1742.85 | 1742.84 | 0.01 | 0 | 80 | 6.10E-07 | 1 | K.IHQAVQESMIFENR.Y          | 0.68 | R&L (1D-GIST) |
| gij18186    | FBgn0000667 | 729.4   | 1456.78 | 1456.77 | 0.01 | 0 | 40 | 0.008    | 1 | R.VGWEQLLSINR.N             | 0.79 | R&L (1D-GIST) |
| gij17861668 | FBgn0001125 | 885.92  | 1769.82 | 1769.8  | 0.02 | 0 | 28 | 0.037    | 1 | R.AGFTVLCSDDEEAAR.V         | 1.13 | R&H (1D-GIST) |
| gij17861668 | FBgn0001125 | 777.41  | 1552.8  | 1552.8  | 0.01 | 0 | 78 | 9.10E-07 | 1 | K.HNVTAQSIGTGALR.I          | 1.17 | R&L (1D-GIST) |
| gij217336   | FBgn0001128 | 798.95  | 1595.89 | 1595.87 | 0.02 | 0 | 82 | 3.10E-07 | 1 | K.AEGGGIDLISHIITR.H         | 0.84 | F&H (1D-GIST) |
| gij217336   | FBgn0001128 | 816.44  | 1630.86 | 1630.84 | 0.02 | 0 | 37 | 0.013    | 1 | K.IVGANAAALPEFEER.V         | 0.66 | F&H (1D-GIST) |
| gij103185   | FBgn0001128 | 797.44  | 1592.87 | 1592.85 | 0.02 | 0 | 79 | 6.00E-07 | 1 | K.AEGGGIDLISHIITR.H         | 0.76 | R&L (1D-GIST) |
| gij8072     | FBgn0001196 | 1193.22 | 2384.43 | 2384.4  | 0.03 | 0 | 81 | 8.00E-09 | 1 | K.LLSGVVIAQGGVLPNIQAVLLPK.K | 0.95 | F&L (1D-GIST) |
| gij8072     | FBgn0001196 | 795.82  | 2384.42 | 2384.4  | 0.02 | 0 | 54 | 4.30E-06 | 1 | K.LLSGVVIAQGGVLPNIQAVLLPK.K | 0.98 | F&L (1D-GIST) |
| gij8072     | FBgn0001196 | 1193.22 | 2384.43 | 2384.4  | 0.02 | 0 | 68 | 1.50E-07 | 1 | K.LLSGVVIAQGGVLPNIQAVLLPK.K | 0.90 | R&L (1D-GIST) |
| gij8072     | FBgn0001196 | 446.77  | 891.53  | 891.53  | 0    | 0 | 36 | 0.003    | 1 | R.HLQLAIR.N                 | 0.97 | R&L (1D-GIST) |
| gij8072     | FBgn0001196 | 795.82  | 2384.43 | 2384.4  | 0.02 | 0 | 50 | 1.20E-05 | 1 | K.LLSGVVIAQGGVLPNIQAVLLPK.K | 1.11 | R&L (1D-GIST) |
| gij266310   | FBgn0001218 | 787.92  | 1573.82 | 1573.81 | 0.01 | 0 | 71 | 5.70E-06 | 1 | K.VFAPEEISAMVLGK.M          | 1.28 | F&L (1D-GIST) |
| gij266310   | FBgn0001218 | 965.5   | 1928.99 | 1928.97 | 0.02 | 0 | 43 | 0.0035   | 1 | K.VTHAVVTPPAYFNDAQR.Q       | 0.90 | F&L (1D-GIST) |
| gij266310   | FBgn0001218 | 787.92  | 1573.82 | 1573.81 | 0.01 | 0 | 75 | 2.30E-06 | 1 | K.VFAPEEISAMVLGK.M          | 1.31 | R&L (1D-GIST) |
| gij266310   | FBgn0001218 | 965.5   | 1928.99 | 1928.97 | 0.02 | 0 | 44 | 0.0029   | 1 | K.VTHAVVTPPAYFNDAQR.Q       | 0.89 | R&L (1D-GIST) |
| gij28571721 | FBgn0001219 | 868.88  | 1735.75 | 1735.75 | 0.01 | 0 | 45 | 0.00034  | 1 | K.STAGDTHLGGEDFDNRL         | 0.78 | F&H (1D-GIST) |
| gij28571721 | FBgn0001219 | 1021.04 | 2040.06 | 2040.04 | 0.02 | 0 | 33 | 0.031    | 1 | K.TVTNAVITVPAYFNDSQR.Q      | 1.14 | F&H (1D-GIST) |
| gij28571721 | FBgn0001219 | 669.38  | 1336.74 | 1336.73 | 0.02 | 0 | 31 | 0.04     | 1 | R.LVTHFVQEFK.R              | 0.84 | F&H (1D-GIST) |
| gij19527633 | FBgn0001219 | 747.92  | 1493.83 | 1493.82 | 0.01 | 0 | 68 | 5.90E-06 | 1 | K.SVIHDIVLVGGSTR.I          | 0.84 | F&L (1D-GIST) |
| gij19527633 | FBgn0001219 | 761.9   | 1521.78 | 1521.76 | 0.02 | 1 | 51 | 0.0004   | 1 | R.ARFEELNADLFR.S            | 0.78 | F&L (1D-GIST) |
| gij103190   | FBgn0001219 | 1021.03 | 2040.05 | 2040.04 | 0.01 | 0 | 36 | 0.015    | 1 | K.TVTNAVITVPAYFNDSQR.Q      | 0.67 | R&H (1D-GIST) |
| gij28571721 | FBgn0001219 | 867.37  | 1732.73 | 1732.73 | 0    | 0 | 50 | 0.00012  | 1 | K.STAGDTHLGGEDFDNRL         | 0.94 | R&L (1D-GIST) |
| gij28571721 | FBgn0001219 | 747.92  | 1493.83 | 1493.82 | 0.01 | 0 | 72 | 3.10E-06 | 1 | K.SVIHDIVLVGGSTR.I          | 0.92 | R&L (1D-GIST) |
| gij28571721 | FBgn0001219 | 761.89  | 1521.77 | 1521.76 | 0.01 | 1 | 55 | 0.00017  | 1 | R.ARFEELNADLFR.S            | 0.96 | R&L (1D-GIST) |
| gij28571721 | FBgn0001219 | 666.36  | 1330.7  | 1330.69 | 0.01 | 0 | 36 | 0.019    | 1 | R.LVTHFVQEFK.R              | 0.92 | R&L (1D-GIST) |
| gij17647529 | FBgn0001233 | 910     | 1817.99 | 1817.97 | 0.02 | 0 | 40 | 0.0056   | 1 | K.QLEINPDHPIVETLR.Q         | 1.07 | F&H (1D-GIST) |
| gij17647529 | FBgn0001233 | 1090.48 | 2178.95 | 2178.94 | 0.02 | 0 | 80 | 8.80E-08 | 1 | R.FHTSASGDDFCSLADYVSR.M     | 0.69 | R&H (1D-GIST) |
| gij24660868 | FBgn0001248 | 750.88  | 1499.75 | 1499.73 | 0.02 | 0 | 74 | 2.50E-06 | 1 | K.AGPVVDVLGDEMTR.I          | 1.12 | F&L (1D-GIST) |
| gij24660868 | FBgn0001248 | 692.35  | 1382.68 | 1382.68 | 0    | 0 | 85 | 1.30E-07 | 1 | K.TVEAEAAHGTVTR.H           | 0.86 | F&L (1D-GIST) |
| gij24660868 | FBgn0001248 | 783.91  | 1565.81 | 1565.8  | 0.01 | 1 | 51 | 0.00056  | 1 | R.FKDIFEDLYNK.Q             | 2.27 | R&H (1D-GIST) |
| gij24660868 | FBgn0001248 | 750.88  | 1499.75 | 1499.73 | 0.02 | 0 | 67 | 1.10E-05 | 1 | K.AGPVVDVLGDEMTR.I          | 0.96 | R&L (1D-GIST) |
| gij24660868 | FBgn0001248 | 692.35  | 1382.68 | 1382.68 | 0    | 0 | 95 | 1.50E-08 | 1 | K.TVEAEAAHGTVTR.H           | 1.27 | R&L (1D-GIST) |
| gij418925   | FBgn0001942 | 790.4   | 1578.78 | 1578.76 | 0.02 | 0 | 70 | 5.10E-06 | 1 | K.LFVLDEADEMLSR.G           | 0.77 | F&L (1D-GIST) |
| gij418925   | FBgn0001942 | 811.93  | 1621.84 | 1621.82 | 0.01 | 0 | 73 | 3.20E-06 | 1 | R.ILESGCHVVVGTPGR.V         | 0.73 | F&L (1D-GIST) |
| gij418925   | FBgn0001942 | 767.39  | 1532.76 | 1532.76 | 0    | 1 | 29 | 0.082    | 1 | K.GVAINFITDDDRR.I           | 0.80 | R&L (1D-GIST) |
| gij418925   | FBgn0001942 | 852.45  | 1702.88 | 1702.86 | 0.02 | 2 | 29 | 0.092    | 1 | R.KGVAINFITDDDRR.I          | 0.95 | R&L (1D-GIST) |

|             |             |         |         |         |       |   |     |          |   |                            |       |               |
|-------------|-------------|---------|---------|---------|-------|---|-----|----------|---|----------------------------|-------|---------------|
| gii418925   | FBgn0001942 | 790.39  | 1578.77 | 1578.76 | 0.01  | 0 | 52  | 0.00036  | 1 | K.LFVLDDEADEMLSR.G         | 0.76  | R&L (1D-GIST) |
| gii418925   | FBgn0001942 | 811.92  | 1621.83 | 1621.82 | 0     | 0 | 93  | 3.30E-08 | 1 | R.ILESGCHVVVGTGR.V         | 0.90  | R&L (1D-GIST) |
| gii17647601 | FBgn0002564 | 553.32  | 1104.63 | 1104.62 | 0.01  | 0 | 55  | 0.00025  | 1 | K.FLFEIVHR.I               | 7.17  | F&H (1D-GIST) |
| gii2454567  | FBgn0002564 | 1037.97 | 2073.93 | 2073.94 | -0.01 | 0 | 70  | 2.00E-06 | 1 | K.YDFPLDISEPHNAFPDR.L      | 5.82  | R&L (1D-GIST) |
| gii2454565  | FBgn0002564 | 551.81  | 1101.61 | 1101.6  | 0.01  | 0 | 62  | 5.10E-05 | 1 | K.FLFEIVHR.I               | 24.54 | R&L (1D-GIST) |
| gii2495185  | FBgn0002565 | 653.88  | 1305.74 | 1305.73 | 0.01  | 0 | 51  | 0.00043  | 1 | K.VHLEAGVNHK.R             | 1.42  | F&H (1D-GIST) |
| gii2495185  | FBgn0002565 | 1312.68 | 2623.35 | 2623.37 | -0.02 | 1 | 31  | 0.038    | 1 | K.FDVETINVLGNIQGNADSVDKK.F | 1.82  | F&H (1D-GIST) |
| gii2495185  | FBgn0002565 | 488.29  | 1461.83 | 1461.83 | 0     | 1 | 29  | 0.054    | 1 | K.VHLEAGVNHK.R.A           | 3.27  | F&H (1D-GIST) |
| gii2495185  | FBgn0002565 | 784.85  | 1567.69 | 1567.67 | 0.01  | 0 | 57  | 3.00E-05 | 1 | K.HDYFFDVHNFK.F            | 1.59  | F&L (1D-GIST) |
| gii2495185  | FBgn0002565 | 762.85  | 1523.68 | 1523.68 | 0     | 0 | 39  | 0.0022   | 1 | K.LDQSEAHCGVPCR.M          | 1.63  | F&L (1D-GIST) |
| gii2495185  | FBgn0002565 | 875.47  | 2623.39 | 2623.37 | 0.02  | 1 | 36  | 0.013    | 1 | K.FDVETINVLGNIQGNADSVDKK.F | 1.28  | R&H (1D-GIST) |
| gii2495185  | FBgn0002565 | 1308.18 | 2614.34 | 2614.31 | 0.02  | 1 | 106 | 1.50E-09 | 1 | K.FDVETINVLGNIQGNADSVDKK.F | 1.90  | R&L (1D-GIST) |
| gii2495185  | FBgn0002565 | 486.27  | 1455.8  | 1455.79 | 0     | 1 | 36  | 0.016    | 1 | K.VHLEAGVNHK.R.A           | 1.70  | R&L (1D-GIST) |
| gii2495185  | FBgn0002565 | 784.85  | 1567.68 | 1567.67 | 0.01  | 0 | 71  | 1.30E-06 | 1 | K.HDYFFDVHNFK.F            | 1.42  | R&L (1D-GIST) |
| gii2495185  | FBgn0002565 | 762.85  | 1523.68 | 1523.68 | 0     | 0 | 59  | 2.50E-05 | 1 | K.LDQSEAHCGVPCR.M          | 1.28  | R&L (1D-GIST) |
| gii2495185  | FBgn0002565 | 650.86  | 1299.7  | 1299.69 | 0     | 0 | 42  | 0.005    | 1 | K.VHLEAGVNHK.R             | 1.35  | R&L (1D-GIST) |
| gii2495185  | FBgn0002565 | 728.91  | 1455.8  | 1455.79 | 0     | 1 | 52  | 0.00038  | 1 | K.VHLEAGVNHK.R.A           | 8.92  | R&L (1D-GIST) |
| gii482955   | FBgn0002741 | 990.02  | 1978.03 | 1978    | 0.03  | 1 | 87  | 1.40E-07 | 1 | K.AKLEQTLDELEDSL.R.E       | 1.58  | F&H (1D-GIST) |
| gii482955   | FBgn0002741 | 747.93  | 1493.84 | 1493.82 | 0.02  | 1 | 62  | 3.30E-05 | 1 | K.ISLTTQLEDTKR.L           | 1.01  | F&H (1D-GIST) |
| gii482955   | FBgn0002741 | 641.33  | 1280.64 | 1280.63 | 0.01  | 0 | 35  | 0.021    | 1 | R.AGVLGQMEEFR.D            | 0.90  | F&H (1D-GIST) |
| gii482955   | FBgn0002741 | 841.41  | 1680.81 | 1680.8  | 0.01  | 1 | 30  | 0.035    | 1 | R.AGVLGQMEEFR.D.R.L        | 0.83  | F&H (1D-GIST) |
| gii482955   | FBgn0002741 | 902.49  | 1802.97 | 1802.95 | 0.02  | 0 | 28  | 0.1      | 1 | R.ATSVRPQFDGLAFPPR.F       | 1.25  | F&H (1D-GIST) |
| gii482955   | FBgn0002741 | 760.37  | 1518.73 | 1518.71 | 0.01  | 0 | 63  | 1.60E-05 | 1 | R.IEELEEEVEAER.Q           | 10.86 | F&H (1D-GIST) |
| gii482955   | FBgn0002741 | 832.94  | 1663.86 | 1663.84 | 0.02  | 0 | 38  | 0.011    | 1 | R.LAEAETIESLNQK.C          | 0.87  | F&H (1D-GIST) |
| gii482955   | FBgn0002741 | 787.9   | 1573.79 | 1573.79 | 0     | 1 | 37  | 0.0091   | 1 | R.RANALQNELES.R.T          | 0.93  | F&H (1D-GIST) |
| gii482280   | FBgn0002741 | 782.1   | 2343.29 | 2343.27 | 0.02  | 2 | 37  | 0.0087   | 1 | K.KKLEADINELEIALDHANK.A    | 0.87  | F&H (1D-GIST) |
| gii482955   | FBgn0002741 | 674.36  | 1346.7  | 1346.69 | 0.01  | 0 | 69  | 8.80E-06 | 1 | K.EQLNSLMTTLR.S            | 0.99  | F&L (1D-GIST) |
| gii482955   | FBgn0002741 | 810.88  | 1619.75 | 1619.74 | 0.01  | 0 | 67  | 7.60E-06 | 1 | K.GAYEEGQEQLEAVR.R         | 0.89  | F&L (1D-GIST) |
| gii482955   | FBgn0002741 | 699.86  | 1397.7  | 1397.68 | 0.02  | 1 | 59  | 7.00E-05 | 1 | K.KGGGFATVSSAYK.E          | 0.48  | F&L (1D-GIST) |
| gii482955   | FBgn0002741 | 686.38  | 1370.75 | 1370.74 | 0.01  | 1 | 41  | 0.0046   | 1 | K.KLSIENS DLLR.Q           | 0.55  | F&L (1D-GIST) |
| gii482955   | FBgn0002741 | 643.84  | 1285.66 | 1285.65 | 0.01  | 0 | 44  | 0.003    | 1 | K.LTQEAVADLER.N            | 0.73  | F&L (1D-GIST) |
| gii482955   | FBgn0002741 | 754.89  | 1507.77 | 1507.76 | 0.01  | 0 | 33  | 0.04     | 1 | K.QLQHTLNEVQSK.L           | 0.71  | F&L (1D-GIST) |
| gii482955   | FBgn0002741 | 609.32  | 1216.63 | 1216.62 | 0.01  | 0 | 47  | 0.0015   | 1 | K.TALLDSLGEK.G             | 0.82  | F&L (1D-GIST) |
| gii482955   | FBgn0002741 | 565.3   | 1128.58 | 1128.57 | 0.01  | 0 | 64  | 3.30E-05 | 1 | R.ADLAEQAISK.F             | 0.85  | F&L (1D-GIST) |
| gii482955   | FBgn0002741 | 998     | 1993.99 | 1993.97 | 0.02  | 0 | 96  | 1.50E-08 | 1 | R.DLEANIQUESTLANLR.K       | 1.13  | F&L (1D-GIST) |
| gii482955   | FBgn0002741 | 665.83  | 1329.64 | 1329.62 | 0.02  | 0 | 74  | 2.30E-06 | 1 | R.ITAAVMHMGGMK.F           | 0.97  | F&L (1D-GIST) |
| gii482955   | FBgn0002741 | 640.82  | 1279.62 | 1279.62 | 0.01  | 0 | 36  | 0.01     | 1 | R.NLEHDLNLR.E              | 0.52  | F&L (1D-GIST) |
| gii482955   | FBgn0002741 | 1150.59 | 2299.16 | 2299.13 | 0.03  | 0 | 39  | 0.0074   | 1 | K.GSLEDQVVQTNPVLEAFGNAK.T  | 0.71  | F&L (1D-GIST) |
| gii482955   | FBgn0002741 | 998.47  | 1994.92 | 1994.9  | 0.02  | 0 | 92  | 1.80E-08 | 1 | K.HNDVAEMAQVQDLNKL.L       | 0.69  | F&L (1D-GIST) |

|             |             |         |         |         |       |   |     |          |   |                                |      |               |
|-------------|-------------|---------|---------|---------|-------|---|-----|----------|---|--------------------------------|------|---------------|
| gii482955   | FBgn0002741 | 1081.57 | 2161.12 | 2161.09 | 0.03  | 1 | 110 | 5.20E-10 | 1 | K.KLEADINELEIALDHANK.A         | 0.95 | F&L (1D-GIST) |
| gii482955   | FBgn0002741 | 1276.15 | 2550.28 | 2550.27 | 0.01  | 1 | 72  | 2.90E-06 | 1 | R.KLESELQTLHSDLDLLENEAK.N      | 1.10 | F&L (1D-GIST) |
| gii482280   | FBgn0002741 | 717.7   | 2150.07 | 2150.07 | 0     | 1 | 48  | 0.00088  | 1 | R.RDLEENIQHESTLANLR.K          | 0.90 | F&L (1D-GIST) |
| gii482280   | FBgn0002741 | 721.38  | 2161.11 | 2161.09 | 0.02  | 1 | 51  | 0.00043  | 1 | K.KLEADINELEIALDHANK.A         | 0.82 | F&L (1D-GIST) |
| gii482280   | FBgn0002741 | 665.67  | 1993.98 | 1993.97 | 0.01  | 0 | 44  | 0.0023   | 1 | R.DLEENIQHESTLANLR.K           | 0.90 | F&L (1D-GIST) |
| gii482280   | FBgn0002741 | 851.11  | 2550.29 | 2550.27 | 0.02  | 1 | 61  | 4.20E-05 | 1 | R.KLESELQTLHSDLDLLENEAK.N      | 1.07 | F&L (1D-GIST) |
| gii482280   | FBgn0002741 | 774.38  | 2320.13 | 2320.12 | 0.01  | 0 | 34  | 0.02     | 1 | K.AEDMSNLTYLNDASVLHNL.R.Q      | 1.25 | R&H (1D-GIST) |
| gii482955   | FBgn0002741 | 729.35  | 1456.68 | 1456.7  | -0.01 | 1 | 38  | 0.0049   | 1 | K.ELSFQSEEDRK.N                | 0.68 | R&H (1D-GIST) |
| gii482955   | FBgn0002741 | 680.38  | 1358.74 | 1358.74 | 0.01  | 1 | 35  | 0.021    | 1 | K.KAEELHAAEVK.V                | 0.97 | R&H (1D-GIST) |
| gii482955   | FBgn0002741 | 602.84  | 1203.66 | 1203.65 | 0.01  | 0 | 44  | 0.0029   | 1 | K.LSIENS DLLR.Q                | 1.07 | R&H (1D-GIST) |
| gii482280   | FBgn0002741 | 1031.2  | 3090.56 | 3090.52 | 0.04  | 2 | 53  | 0.00022  | 1 | K.RLEAEKDELQAAL EEA AALQEENK.V | 0.68 | R&H (1D-GIST) |
| gii482955   | FBgn0002741 | 845.94  | 1689.87 | 1689.85 | 0.02  | 0 | 45  | 0.0022   | 1 | R.LSTEVEDLQLEVDRA              | 0.83 | R&H (1D-GIST) |
| gii482955   | FBgn0002741 | 704.38  | 1406.75 | 1406.74 | 0.01  | 1 | 37  | 0.014    | 1 | K.KGGGFATVSSAYK.E              | 0.89 | R&H (1D-GIST) |
| gii482955   | FBgn0002741 | 641.33  | 1280.64 | 1280.63 | 0.01  | 0 | 47  | 0.0013   | 1 | R.AGVLGQMEEFR.D                | 1.10 | R&H (1D-GIST) |
| gii482955   | FBgn0002741 | 841.41  | 1680.81 | 1680.8  | 0.01  | 1 | 37  | 0.0082   | 1 | R.AGVLGQMEEFRDER.L             | 0.81 | R&H (1D-GIST) |
| gii482955   | FBgn0002741 | 714.38  | 1426.75 | 1426.74 | 0.01  | 0 | 59  | 9.50E-05 | 1 | K.GDIVSVGLQGGVEVR.D            | 1.94 | R&L (1D-GIST) |
| gii482280   | FBgn0002741 | 767.39  | 2299.15 | 2299.13 | 0.02  | 0 | 36  | 0.014    | 1 | K.GSLEDQVVQTNPVLEAFGNAK.T      | 0.68 | R&L (1D-GIST) |
| gii482280   | FBgn0002741 | 665.98  | 1994.92 | 1994.9  | 0.02  | 0 | 58  | 4.30E-05 | 1 | K.HNDAVAEMAEQVDQLNK.L          | 0.80 | R&L (1D-GIST) |
| gii482955   | FBgn0002741 | 1081.57 | 2161.12 | 2161.09 | 0.03  | 1 | 98  | 9.10E-09 | 1 | K.KLEADINELEIALDHANK.A         | 0.76 | R&L (1D-GIST) |
| gii7579901  | FBgn0002741 | 871.45  | 1740.89 | 1740.88 | 0.02  | 1 | 35  | 0.023    | 1 | K.LKVDDLAELDASQK.E             | 0.89 | R&L (1D-GIST) |
| gii482955   | FBgn0002741 | 1276.16 | 2550.31 | 2550.27 | 0.04  | 1 | 68  | 7.40E-06 | 1 | R.KLESELQTLHSDLDLLENEAK.N      | 0.71 | R&L (1D-GIST) |
| gii482955   | FBgn0002741 | 987     | 1971.99 | 1971.96 | 0.02  | 1 | 84  | 2.50E-07 | 1 | K.AKLEQTLDELEDSL.R.E           | 0.94 | R&L (1D-GIST) |
| gii482955   | FBgn0002741 | 674.36  | 1346.7  | 1346.69 | 0.01  | 0 | 62  | 4.20E-05 | 1 | K.EQLNSLMTTLR.S                | 0.83 | R&L (1D-GIST) |
| gii7579901  | FBgn0002741 | 810.88  | 1619.75 | 1619.74 | 0     | 0 | 65  | 1.00E-05 | 1 | K.GAYEEGQEQLEAVR.R             | 0.77 | R&L (1D-GIST) |
| gii482955   | FBgn0002741 | 1150.59 | 2299.16 | 2299.13 | 0.03  | 0 | 32  | 0.038    | 1 | K.GSLEDQVVQTNPVLEAFGNAK.T      | 0.79 | R&L (1D-GIST) |
| gii482955   | FBgn0002741 | 998.47  | 1994.93 | 1994.9  | 0.03  | 0 | 109 | 4.20E-10 | 1 | K.HNDAVAEMAEQVDQLNK.L          | 0.81 | R&L (1D-GIST) |
| gii7579901  | FBgn0002741 | 744.91  | 1487.8  | 1487.78 | 0.02  | 1 | 44  | 0.0022   | 1 | K.ISLTTQLEDTKR.L               | 0.82 | R&L (1D-GIST) |
| gii482280   | FBgn0002741 | 721.38  | 2161.11 | 2161.09 | 0.02  | 1 | 49  | 0.00084  | 1 | K.KLEADINELEIALDHANK.A         | 0.96 | R&L (1D-GIST) |
| gii7579901  | FBgn0002741 | 686.38  | 1370.75 | 1370.74 | 0.01  | 1 | 55  | 0.00022  | 1 | K.KLSIENS DLLR.Q               | 0.96 | R&L (1D-GIST) |
| gii482955   | FBgn0002741 | 643.84  | 1285.66 | 1285.65 | 0.01  | 0 | 53  | 0.00043  | 1 | K.LTQEA VADLER.N               | 0.81 | R&L (1D-GIST) |
| gii482955   | FBgn0002741 | 609.32  | 1216.63 | 1216.62 | 0.01  | 0 | 30  | 0.087    | 1 | K.TALLDSL SGEK.G               | 0.70 | R&L (1D-GIST) |
| gii482955   | FBgn0002741 | 998     | 1993.98 | 1993.97 | 0.01  | 0 | 88  | 9.20E-08 | 1 | R.DLEENIQHESTLANLR.K           | 0.75 | R&L (1D-GIST) |
| gii482955   | FBgn0002741 | 758.86  | 1515.71 | 1515.69 | 0.02  | 0 | 58  | 7.10E-05 | 1 | R.IEELEEEVEAER.Q               | 0.99 | R&L (1D-GIST) |
| gii482955   | FBgn0002741 | 665.83  | 1329.64 | 1329.62 | 0.01  | 0 | 64  | 2.30E-05 | 1 | R.ITAAVMHMGGMK.F               | 0.75 | R&L (1D-GIST) |
| gii482280   | FBgn0002741 | 851.11  | 2550.29 | 2550.27 | 0.02  | 1 | 68  | 7.70E-06 | 1 | R.KLESELQTLHSDLDLLENEAK.N      | 0.89 | R&L (1D-GIST) |
| gii7579901  | FBgn0002741 | 829.92  | 1657.82 | 1657.8  | 0.01  | 0 | 33  | 0.034    | 1 | R.LAEAEETIESLNQK.C             | 0.78 | R&L (1D-GIST) |
| gii482955   | FBgn0002741 | 786.39  | 1570.77 | 1570.77 | 0     | 1 | 47  | 0.0012   | 1 | R.RANALQNEELES.R.T             | 1.29 | R&L (1D-GIST) |
| gii17136340 | FBgn0002772 | 910.01  | 1818.01 | 1817.98 | 0.03  | 1 | 28  | 0.056    | 1 | K.IKLDEF LPIYSQVK.K            | 0.91 | F&L (1D-GIST) |
| gii17136340 | FBgn0002772 | 768.41  | 1534.81 | 1534.79 | 0.02  | 0 | 54  | 0.00023  | 1 | K.LDEF LPIYSQVK.K              | 0.77 | F&L (1D-GIST) |

|             |             |         |         |         |       |   |     |          |   |                         |      |               |
|-------------|-------------|---------|---------|---------|-------|---|-----|----------|---|-------------------------|------|---------------|
| gij17136340 | FBgn0002772 | 747.44  | 1492.87 | 1492.85 | 0.02  | 0 | 63  | 1.00E-05 | 1 | R.ALNLNPTLALIEK.L       | 0.83 | F&L (1D-GIST) |
| gij17136340 | FBgn0002772 | 768.41  | 1534.81 | 1534.79 | 0.01  | 0 | 61  | 5.60E-05 | 1 | K.LDEFLPIYSQVK.K        | 0.90 | R&L (1D-GIST) |
| gij17136340 | FBgn0002772 | 747.44  | 1492.87 | 1492.85 | 0.02  | 0 | 70  | 2.10E-06 | 1 | R.ALNLNPTLALIEK.L       | 0.96 | R&L (1D-GIST) |
| gij2944333  | FBgn0002921 | 660.87  | 1319.73 | 1319.71 | 0.02  | 0 | 36  | 0.02     | 1 | K.NMVPQFATVIR.G         | 0.78 | F&H (1D-GIST) |
| gij2944333  | FBgn0002921 | 981.51  | 1961    | 1960.98 | 0.02  | 0 | 62  | 3.70E-05 | 1 | K.SVGIHSEGNETVEDIAQR.L  | 1.24 | F&H (1D-GIST) |
| gij2944333  | FBgn0002921 | 852.48  | 1702.95 | 1702.93 | 0.02  | 0 | 33  | 0.032    | 1 | R.IAGLASGLDTGETPIAK.E   | 0.88 | F&H (1D-GIST) |
| gij2944333  | FBgn0002921 | 641.87  | 1281.72 | 1281.71 | 0.01  | 0 | 36  | 0.012    | 1 | R.LNIPVSEVNPR.E         | 0.90 | F&H (1D-GIST) |
| gij2944333  | FBgn0002921 | 532.8   | 1063.58 | 1063.58 | 0     | 0 | 44  | 0.0022   | 1 | K.AAVVHGAELR.D          | 1.07 | F&L (1D-GIST) |
| gij2944333  | FBgn0002921 | 906.92  | 1811.82 | 1811.81 | 0     | 0 | 27  | 0.049    | 1 | K.EAFNNAYMELGGLGER.V    | 1.05 | F&L (1D-GIST) |
| gij2944333  | FBgn0002921 | 765.37  | 1528.72 | 1528.71 | 0.01  | 0 | 77  | 9.80E-07 | 1 | K.GVVISCGDHTVMGR.I      | 0.83 | F&L (1D-GIST) |
| gij2944333  | FBgn0002921 | 733.4   | 1464.78 | 1464.76 | 0.02  | 0 | 62  | 3.50E-05 | 1 | K.VIMVTGDHPITAK.A       | 1.09 | F&L (1D-GIST) |
| gij2944333  | FBgn0002921 | 923.42  | 1844.82 | 1844.82 | 0     | 0 | 72  | 1.20E-06 | 1 | K.YQVSIHETEDTNDPR.Y     | 0.98 | F&L (1D-GIST) |
| gij2944333  | FBgn0002921 | 702.86  | 1403.71 | 1403.69 | 0.02  | 0 | 65  | 2.20E-05 | 1 | R.FVGLMSMIDPPR.A        | 0.94 | F&L (1D-GIST) |
| gij2944333  | FBgn0002921 | 949.99  | 1897.96 | 1897.95 | 0.02  | 0 | 70  | 6.60E-06 | 1 | R.MGAIVAVTGDGVNDSPALK.K | 0.82 | F&L (1D-GIST) |
| gij2944333  | FBgn0002921 | 589.31  | 1176.6  | 1176.59 | 0.01  | 0 | 37  | 0.014    | 1 | R.YHTEIVFAR.T           | 0.90 | F&L (1D-GIST) |
| gij2944333  | FBgn0002921 | 869.94  | 1737.86 | 1737.84 | 0.02  | 0 | 36  | 0.013    | 1 | K.FNTDDINFIDNLR.F       | 0.72 | R&H (1D-GIST) |
| gij2944333  | FBgn0002921 | 908.43  | 1814.84 | 1814.83 | 0.01  | 0 | 47  | 0.00058  | 1 | K.EAFNNAYMELGGLGER.V    | 0.79 | R&H (1D-GIST) |
| gij2944333  | FBgn0002921 | 532.8   | 1063.58 | 1063.58 | 0     | 0 | 52  | 0.00032  | 1 | K.AAVVHGAELR.D          | 0.91 | R&L (1D-GIST) |
| gij2944333  | FBgn0002921 | 765.37  | 1528.72 | 1528.71 | 0.01  | 0 | 89  | 5.20E-08 | 1 | K.GVVISCGDHTVMGR.I      | 0.78 | R&L (1D-GIST) |
| gij2944333  | FBgn0002921 | 980     | 1957.98 | 1957.96 | 0.02  | 0 | 75  | 2.00E-06 | 1 | K.SVGIHSEGNETVEDIAQR.L  | 0.63 | R&L (1D-GIST) |
| gij2944333  | FBgn0002921 | 923.42  | 1844.82 | 1844.82 | 0     | 0 | 72  | 1.30E-06 | 1 | K.YQVSIHETEDTNDPR.Y     | 0.67 | R&L (1D-GIST) |
| gij2944333  | FBgn0002921 | 702.86  | 1403.71 | 1403.69 | 0.02  | 0 | 41  | 0.0049   | 1 | R.FVGLMSMIDPPR.A        | 0.74 | R&L (1D-GIST) |
| gij2944333  | FBgn0002921 | 849.46  | 1696.9  | 1696.89 | 0.02  | 0 | 63  | 2.70E-05 | 1 | R.IAGLASGLDTGETPIAK.E   | 0.79 | R&L (1D-GIST) |
| gij2944333  | FBgn0002921 | 949.99  | 1897.97 | 1897.95 | 0.03  | 0 | 83  | 3.40E-07 | 1 | R.MGAIVAVTGDGVNDSPALK.K | 0.69 | R&L (1D-GIST) |
| gij2944333  | FBgn0002921 | 589.31  | 1176.6  | 1176.59 | 0     | 0 | 50  | 0.00073  | 1 | R.YHTEIVFAR.T           | 0.84 | R&L (1D-GIST) |
| gij84873    | FBgn0002938 | 656.42  | 1310.83 | 1310.81 | 0.02  | 0 | 32  | 0.005    | 1 | K.VLAAILNIGNIR.F        | 0.63 | F&H (1D-GIST) |
| gij84872    | FBgn0002938 | 585.35  | 1168.69 | 1168.68 | 0.01  | 0 | 68  | 6.30E-06 | 1 | K.ALGVLDTVIAR.Q         | 0.71 | F&L (1D-GIST) |
| gij84872    | FBgn0002938 | 516.3   | 1030.59 | 1030.58 | 0.01  | 0 | 48  | 0.00065  | 1 | R.LVDIFIINR.I           | 1.15 | F&L (1D-GIST) |
| gij84872    | FBgn0002938 | 749.34  | 2245    | 2244.99 | 0.01  | 0 | 27  | 0.045    | 1 | K.IQHYDEEHQVSIEEYR.T    | 1.10 | F&L (1D-GIST) |
| gij84872    | FBgn0002938 | 750.35  | 2248.02 | 2248.01 | 0     | 0 | 45  | 0.0005   | 1 | K.IQHYDEEHQVSIEEYR.T    | 0.62 | R&H (1D-GIST) |
| gij84873    | FBgn0002938 | 1123.49 | 2244.97 | 2244.99 | -0.02 | 0 | 114 | 4.80E-11 | 1 | K.IQHYDEEHQVSIEEYR.T    | 0.75 | R&L (1D-GIST) |
| gij84873    | FBgn0002938 | 585.35  | 1168.69 | 1168.68 | 0.01  | 0 | 68  | 6.80E-06 | 1 | K.ALGVLDTVIAR.Q         | 0.77 | R&L (1D-GIST) |
| gij84873    | FBgn0002938 | 654.91  | 1307.8  | 1307.79 | 0.01  | 0 | 62  | 6.20E-06 | 1 | K.VLAAILNIGNIR.F        | 0.73 | R&L (1D-GIST) |
| gij84873    | FBgn0002938 | 516.3   | 1030.59 | 1030.58 | 0.01  | 0 | 48  | 0.00071  | 1 | R.LVDIFIINR.I           | 0.70 | R&L (1D-GIST) |
| gij279529   | FBgn0003075 | 838.91  | 1675.81 | 1675.8  | 0.02  | 0 | 72  | 3.50E-06 | 1 | K.LGDVYVNDAFGTAHR.A     | 0.80 | F&L (1D-GIST) |
| gij279529   | FBgn0003075 | 847.45  | 1692.88 | 1692.86 | 0.02  | 0 | 34  | 0.02     | 1 | K.SVVLMSHLGRPDGNK.N     | 0.76 | F&L (1D-GIST) |
| gij279529   | FBgn0003075 | 838.91  | 1675.81 | 1675.8  | 0.02  | 0 | 86  | 1.60E-07 | 1 | K.LGDVYVNDAFGTAHR.A     | 1.03 | R&L (1D-GIST) |
| gij279529   | FBgn0003075 | 847.45  | 1692.88 | 1692.86 | 0.02  | 0 | 36  | 0.015    | 1 | K.SVVLMSHLGRPDGNK.N     | 0.92 | R&L (1D-GIST) |
| gij10959    | FBgn0003149 | 899.47  | 1796.93 | 1796.92 | 0.01  | 2 | 40  | 0.0068   | 1 | R.RLENERDELTAAYK.E      | 0.77 | F&H (1D-GIST) |

|             |             |         |         |         |      |   |     |          |   |                          |      |               |
|-------------|-------------|---------|---------|---------|------|---|-----|----------|---|--------------------------|------|---------------|
| gij10959    | FBgn0003149 | 670.38  | 1338.75 | 1338.74 | 0.01 | 0 | 74  | 1.60E-06 | 1 | K.NLILLQDALDK.S          | 0.81 | F&L (1D-GIST) |
| gij10959    | FBgn0003149 | 644.34  | 1286.66 | 1286.65 | 0.02 | 0 | 40  | 0.008    | 1 | K.SQVISQLEDAR.R          | 0.75 | F&L (1D-GIST) |
| gij10959    | FBgn0003149 | 671.36  | 1340.71 | 1340.69 | 0.02 | 0 | 63  | 3.60E-05 | 1 | R.LAGLNGELEEV.R          | 0.54 | F&L (1D-GIST) |
| gij10959    | FBgn0003149 | 914.91  | 1827.82 | 1827.8  | 0.01 | 0 | 108 | 3.20E-10 | 1 | R.LEEAEGGAEHQFEANR.K     | 0.93 | F&L (1D-GIST) |
| gij10959    | FBgn0003149 | 867.42  | 1732.83 | 1732.82 | 0    | 0 | 80  | 4.10E-07 | 1 | R.QLSEQEGVSQTTTR.V       | 0.86 | F&L (1D-GIST) |
| gij10959    | FBgn0003149 | 1048.56 | 2095.1  | 2095.08 | 0.02 | 0 | 79  | 6.40E-07 | 1 | R.SLLESSLHQVEIELDSVR.N   | 0.82 | F&L (1D-GIST) |
| gij10959    | FBgn0003149 | 780.88  | 1559.74 | 1559.73 | 0    | 0 | 81  | 2.70E-07 | 1 | K.HVVEQVHEEQER.I         | 0.81 | F&L (1D-GIST) |
| gij10959    | FBgn0003149 | 520.92  | 1559.73 | 1559.73 | 0    | 0 | 45  | 0.0011   | 1 | K.HVVEQVHEEQER.I         | 0.83 | F&L (1D-GIST) |
| gij10959    | FBgn0003149 | 610.28  | 1827.81 | 1827.8  | 0.01 | 0 | 59  | 2.00E-05 | 1 | R.LEEAEGGAEHQFEANR.K     | 0.83 | F&L (1D-GIST) |
| gij10959    | FBgn0003149 | 450.59  | 1348.75 | 1348.75 | 0.01 | 1 | 44  | 0.0016   | 1 | R.RLHELELELR.R           | 0.76 | F&L (1D-GIST) |
| gij10959    | FBgn0003149 | 520.92  | 1559.73 | 1559.73 | 0    | 0 | 47  | 0.00081  | 1 | K.HVVEQVHEEQER.I         | 1.09 | R&L (1D-GIST) |
| gij10959    | FBgn0003149 | 597.33  | 1192.65 | 1192.65 | 0    | 0 | 41  | 0.0035   | 1 | R.LHELELELR.R            | 0.89 | R&L (1D-GIST) |
| gij10959    | FBgn0003149 | 450.59  | 1348.75 | 1348.75 | 0.01 | 1 | 34  | 0.016    | 1 | R.RLHELELELR.R           | 1.02 | R&L (1D-GIST) |
| gij10959    | FBgn0003149 | 719.35  | 1436.68 | 1436.68 | 0.01 | 0 | 44  | 0.0025   | 1 | R.TVELQYEEAASR.I         | 0.86 | R&L (1D-GIST) |
| gij10959    | FBgn0003149 | 780.87  | 1559.73 | 1559.73 | 0    | 0 | 75  | 1.30E-06 | 1 | K.HVVEQVHEEQER.I         | 1.25 | R&L (1D-GIST) |
| gij10959    | FBgn0003149 | 670.38  | 1338.75 | 1338.74 | 0.01 | 0 | 72  | 2.60E-06 | 1 | K.NLILLQDALDK.S          | 0.91 | R&L (1D-GIST) |
| gij10959    | FBgn0003149 | 671.36  | 1340.7  | 1340.69 | 0.01 | 0 | 69  | 8.20E-06 | 1 | R.LAGLNGELEEV.R          | 0.94 | R&L (1D-GIST) |
| gij10959    | FBgn0003149 | 914.92  | 1827.82 | 1827.8  | 0.02 | 0 | 106 | 4.70E-10 | 1 | R.LEEAEGGAEHQFEANR.K     | 0.84 | R&L (1D-GIST) |
| gij10959    | FBgn0003149 | 867.42  | 1732.82 | 1732.82 | 0    | 0 | 68  | 7.90E-06 | 1 | R.QLSEQEGVSQTTTR.V       | 0.82 | R&L (1D-GIST) |
| gij10959    | FBgn0003149 | 675.38  | 1348.75 | 1348.75 | 0.01 | 1 | 28  | 0.064    | 1 | R.RLHELELELR.R           | 1.08 | R&L (1D-GIST) |
| gij10959    | FBgn0003149 | 1048.56 | 2095.1  | 2095.08 | 0.03 | 0 | 72  | 3.40E-06 | 1 | R.SLLESSLHQVEIELDSVR.N   | 0.79 | R&L (1D-GIST) |
| gij1079084  | FBgn0003162 | 770.43  | 1538.84 | 1538.82 | 0.02 | 1 | 66  | 1.60E-05 | 1 | K.TREEFLNLVNSK.-         | 1.11 | F&H (1D-GIST) |
| gij38455513 | FBgn0003162 | 627.34  | 1252.66 | 1252.65 | 0.01 | 0 | 64  | 1.90E-05 | 1 | K.TVTSTMLGVFR.D          | 0.94 | F&L (1D-GIST) |
| gij38455513 | FBgn0003162 | 648.36  | 1294.7  | 1294.69 | 0.02 | 0 | 72  | 3.00E-06 | 1 | R.LLLGGLGENPDR.Q         | 0.96 | F&L (1D-GIST) |
| gij38455513 | FBgn0003162 | 767.4   | 1532.79 | 1532.78 | 0.01 | 1 | 69  | 9.20E-06 | 1 | K.TREEFLNLVNSK.-         | 0.90 | R&L (1D-GIST) |
| gij38455513 | FBgn0003162 | 627.34  | 1252.66 | 1252.65 | 0.01 | 0 | 68  | 7.20E-06 | 1 | K.TVTSTMLGVFR.D          | 0.98 | R&L (1D-GIST) |
| gij3128475  | FBgn0003178 | 668.86  | 1335.7  | 1335.69 | 0.01 | 0 | 31  | 0.04     | 1 | R.LQFDSPPVPHV.R.L        | 0.91 | F&L (1D-GIST) |
| gij3128475  | FBgn0003178 | 724     | 2168.98 | 2168.98 | 0    | 0 | 36  | 0.0064   | 1 | R.MNFSHGSHEYHAATVANVR.Q  | 0.85 | F&L (1D-GIST) |
| gij3128475  | FBgn0003178 | 990.51  | 1979.01 | 1979    | 0.01 | 0 | 50  | 0.00071  | 1 | R.GAGTIDASHAAIAAVEAATK.A | 1.12 | R&L (1D-GIST) |
| gij3128475  | FBgn0003178 | 724     | 2168.99 | 2168.98 | 0.01 | 0 | 39  | 0.0037   | 1 | R.MNFSHGSHEYHAATVANVR.Q  | 0.77 | R&L (1D-GIST) |
| gij132748   | FBgn0003279 | 968.07  | 1934.12 | 1934.1  | 0.02 | 0 | 32  | 0.0095   | 1 | R.YALVSAIAASGVPALVQSK.G  | 0.90 | F&H (1D-GIST) |
| gij132748   | FBgn0003279 | 633.36  | 1897.07 | 1897.05 | 0.01 | 0 | 43  | 0.0016   | 1 | K.APIRPDVVNEVHQLLR.R     | 0.84 | F&L (1D-GIST) |
| gij132748   | FBgn0003279 | 968.06  | 1934.11 | 1934.1  | 0.01 | 0 | 67  | 4.30E-06 | 1 | R.YALVSAIAASGVPALVQSK.G  | 0.91 | R&H (1D-GIST) |
| gij132748   | FBgn0003279 | 645.71  | 1934.11 | 1934.1  | 0.01 | 0 | 51  | 0.00019  | 1 | R.YALVSAIAASGVPALVQSK.G  | 0.92 | R&H (1D-GIST) |
| gij132748   | FBgn0003279 | 633.36  | 1897.07 | 1897.05 | 0.01 | 0 | 31  | 0.024    | 1 | K.APIRPDVVNEVHQLLR.R     | 0.91 | R&L (1D-GIST) |
| gij7159652  | FBgn0003432 | 610.98  | 1829.93 | 1829.93 | 0.01 | 0 | 43  | 0.0034   | 1 | R.HWLQAESLHPDSLPR.I      | 1.01 | F&H (1D-GIST) |
| gij7159652  | FBgn0003432 | 498.91  | 1493.7  | 1493.7  | 0    | 0 | 38  | 0.0056   | 1 | R.INEQTAHFEAR.L          | 0.80 | F&L (1D-GIST) |
| gij8250181  | FBgn0003432 | 747.86  | 1493.7  | 1493.7  | 0    | 0 | 56  | 0.0001   | 1 | R.INEQTAHFEAR.L          | 0.86 | R&L (1D-GIST) |
| gij8250181  | FBgn0003432 | 706.85  | 1411.69 | 1411.68 | 0    | 0 | 33  | 0.019    | 1 | R.VAENQAVHFEAR.L         | 0.95 | R&L (1D-GIST) |

|             |             |        |         |         |       |   |     |          |   |                               |      |               |
|-------------|-------------|--------|---------|---------|-------|---|-----|----------|---|-------------------------------|------|---------------|
| gii8250181  | FBgn0003432 | 498.91 | 1493.7  | 1493.7  | 0     | 0 | 37  | 0.0084   | 1 | R.INEHQTAHFEAR.L              | 1.01 | R&L (1D-GIST) |
| gii103399   | FBgn0003470 | 792.88 | 1583.74 | 1583.73 | 0.01  | 0 | 94  | 1.40E-08 | 1 | K.HQAFEAEELANADR.I            | 1.27 | F&L (1D-GIST) |
| gii103399   | FBgn0003470 | 836.89 | 1671.77 | 1671.75 | 0.02  | 1 | 55  | 0.0001   | 1 | K.KHDAFETDFTAHK.D             | 0.87 | F&L (1D-GIST) |
| gii103399   | FBgn0003470 | 751.41 | 1500.8  | 1500.79 | 0.02  | 0 | 59  | 8.50E-05 | 1 | R.LLNVISSGENMLK.D             | 0.85 | F&L (1D-GIST) |
| gii103399   | FBgn0003470 | 549.93 | 1646.77 | 1646.78 | -0.01 | 0 | 72  | 2.20E-06 | 1 | K.HALLEADVMAHQDR.I            | 0.52 | F&L (1D-GIST) |
| gii103399   | FBgn0003470 | 937.16 | 2808.47 | 2808.43 | 0.04  | 0 | 66  | 1.10E-05 | 1 | K.IAALQTVADQLIAQNHYASNLVDEK.R | 0.79 | F&L (1D-GIST) |
| gii103399   | FBgn0003470 | 559.62 | 1675.84 | 1675.84 | 0     | 0 | 61  | 4.40E-05 | 1 | K.HQLVEADIVAHEDR.I            | 1.19 | R&H (1D-GIST) |
| gii103399   | FBgn0003470 | 781.87 | 1561.73 | 1561.72 | 0.01  | 0 | 75  | 1.10E-06 | 1 | K.FIESGHFDADNIR.N             | 0.74 | R&L (1D-GIST) |
| gii103399   | FBgn0003470 | 549.94 | 1646.79 | 1646.78 | 0     | 0 | 72  | 2.70E-06 | 1 | K.HALLEADVMAHQDR.I            | 0.78 | R&L (1D-GIST) |
| gii103399   | FBgn0003470 | 792.88 | 1583.74 | 1583.73 | 0.01  | 0 | 111 | 2.60E-10 | 1 | K.HQAFEAEELANADR.I            | 0.97 | R&L (1D-GIST) |
| gii103399   | FBgn0003470 | 937.16 | 2808.47 | 2808.43 | 0.04  | 0 | 66  | 1.00E-05 | 1 | K.IAALQTVADQLIAQNHYASNLVDEK.R | 1.05 | R&L (1D-GIST) |
| gii103399   | FBgn0003470 | 836.89 | 1671.76 | 1671.75 | 0.01  | 1 | 59  | 3.10E-05 | 1 | K.KHDAFETDFTAHK.D             | 0.90 | R&L (1D-GIST) |
| gii103399   | FBgn0003470 | 751.41 | 1500.8  | 1500.79 | 0.02  | 0 | 59  | 7.70E-05 | 1 | R.LLNVISSGENMLK.D             | 0.82 | R&L (1D-GIST) |
| gii423777   | FBgn0003471 | 764.44 | 1526.86 | 1526.85 | 0     | 1 | 58  | 7.60E-05 | 1 | K.KFEALISDLTQK.W              | 1.08 | F&H (1D-GIST) |
| gii423777   | FBgn0003471 | 816.91 | 1631.81 | 1631.8  | 0.02  | 0 | 69  | 7.60E-06 | 1 | K.VGSELITEGHFGADR.I           | 0.80 | F&H (1D-GIST) |
| gii423777   | FBgn0003471 | 759.91 | 1517.81 | 1517.8  | 0.01  | 1 | 64  | 2.60E-05 | 1 | K.KFEALISDLTQK.W              | 0.84 | R&L (1D-GIST) |
| gii423777   | FBgn0003471 | 815.4  | 1628.79 | 1628.78 | 0.01  | 0 | 63  | 2.60E-05 | 1 | K.VGSELITEGHFGADR.I           | 1.05 | R&L (1D-GIST) |
| gii85165    | FBgn0003721 | 587.83 | 1173.64 | 1173.63 | 0.01  | 0 | 43  | 0.0029   | 1 | K.IVELEELR.L                  | 0.77 | F&H (1D-GIST) |
| gii38047701 | FBgn0003721 | 764.4  | 1526.79 | 1526.77 | 0.02  | 0 | 67  | 1.50E-05 | 1 | K.ALQNAESEVAALNR.R            | 0.82 | F&L (1D-GIST) |
| gii38047701 | FBgn0003721 | 586.32 | 1170.62 | 1170.61 | 0.01  | 0 | 67  | 1.70E-05 | 1 | K.IVELEELR.V                  | 0.64 | F&L (1D-GIST) |
| gii38047701 | FBgn0003721 | 594.8  | 1187.59 | 1187.59 | 0.01  | 0 | 50  | 0.0008   | 1 | K.LAMVEADLER.A                | 0.52 | F&L (1D-GIST) |
| gii38047701 | FBgn0003721 | 650.35 | 1298.69 | 1298.67 | 0.01  | 0 | 40  | 0.0071   | 1 | R.IQLLEEDLER.S                | 0.77 | F&L (1D-GIST) |
| gii38047701 | FBgn0003721 | 679.86 | 1357.7  | 1357.69 | 0.01  | 1 | 99  | 9.70E-09 | 1 | R.KLAMVEADLER.A               | 0.94 | F&L (1D-GIST) |
| gii38047701 | FBgn0003721 | 728.4  | 1454.79 | 1454.77 | 0.01  | 1 | 43  | 0.003    | 1 | R.RIQLLEEDLER.S               | 0.83 | F&L (1D-GIST) |
| gii85165    | FBgn0003721 | 862.13 | 2583.35 | 2583.33 | 0.03  | 1 | 58  | 7.00E-05 | 1 | K.KIQTVENELDQTQEALTLVTGK.L    | 0.88 | F&L (1D-GIST) |
| gii85164    | FBgn0003721 | 587.83 | 1173.64 | 1173.63 | 0.01  | 0 | 67  | 1.20E-05 | 1 | K.IVELEELR.V                  | 0.96 | R&H (1D-GIST) |
| gii85165    | FBgn0003721 | 764.4  | 1526.78 | 1526.77 | 0.01  | 0 | 57  | 0.00014  | 1 | K.ALQNAESEVAALNR.R            | 1.07 | R&L (1D-GIST) |
| gii85165    | FBgn0003721 | 586.32 | 1170.62 | 1170.61 | 0.01  | 0 | 65  | 2.50E-05 | 1 | K.IVELEELR.L                  | 1.07 | R&L (1D-GIST) |
| gii1351285  | FBgn0003721 | 862.13 | 2583.36 | 2583.33 | 0.03  | 1 | 61  | 3.50E-05 | 1 | K.KIQTVENELDQTQEALTLVTGK.L    | 0.93 | R&L (1D-GIST) |
| gii85165    | FBgn0003721 | 594.8  | 1187.59 | 1187.59 | 0.01  | 0 | 64  | 3.20E-05 | 1 | K.LAMVEADLER.A                | 1.03 | R&L (1D-GIST) |
| gii85165    | FBgn0003721 | 650.35 | 1298.68 | 1298.67 | 0.01  | 0 | 40  | 0.0072   | 1 | R.IQLLEEDLER.S                | 0.82 | R&L (1D-GIST) |
| gii85165    | FBgn0003721 | 679.86 | 1357.71 | 1357.69 | 0.02  | 1 | 95  | 2.40E-08 | 1 | R.KLAMVEADLER.A               | 0.86 | R&L (1D-GIST) |
| gii85165    | FBgn0003721 | 728.4  | 1454.78 | 1454.77 | 0.01  | 1 | 43  | 0.0038   | 1 | R.RIQLLEEDLER.S               | 0.87 | R&L (1D-GIST) |
| gii17136564 | FBgn0003884 | 557.32 | 1112.62 | 1112.61 | 0.01  | 0 | 68  | 1.40E-05 | 1 | K.EIVDLVLDRI                  | 0.80 | F&L (1D-GIST) |
| gii17136564 | FBgn0003884 | 935.02 | 1868.02 | 1868.01 | 0.01  | 0 | 63  | 2.30E-05 | 1 | R.IHFPLVITYAPVISAEK.A         | 0.98 | F&L (1D-GIST) |
| gii17136564 | FBgn0003884 | 880.96 | 1759.9  | 1759.89 | 0.02  | 0 | 29  | 0.088    | 1 | R.NLDIERPTYTNLNR.L            | 0.84 | F&L (1D-GIST) |
| gii17136564 | FBgn0003884 | 557.31 | 1112.62 | 1112.61 | 0.01  | 0 | 59  | 9.40E-05 | 1 | K.EIVDLVLDRI                  | 0.86 | R&L (1D-GIST) |
| gii17136564 | FBgn0003884 | 935.02 | 1868.04 | 1868.01 | 0.03  | 0 | 66  | 8.50E-06 | 1 | R.IHFPLVITYAPVISAEK.A         | 0.76 | R&L (1D-GIST) |
| gii17136564 | FBgn0003884 | 880.95 | 1759.89 | 1759.89 | 0.01  | 0 | 28  | 0.11     | 1 | R.NLDIERPTYTNLNR.L            | 0.82 | R&L (1D-GIST) |



|             |             |         |         |         |       |   |     |          |   |                                     |      |               |
|-------------|-------------|---------|---------|---------|-------|---|-----|----------|---|-------------------------------------|------|---------------|
| gij17945305 | FBgn0004117 | 612.33  | 1222.64 | 1222.63 | 0.01  | 0 | 30  | 0.069    | 1 | K.IMELEEBELK.V                      | 0.87 | F&H (1D-GIST) |
| gij17945305 | FBgn0004117 | 751.86  | 1501.71 | 1501.7  | 0.01  | 0 | 46  | 0.001    | 1 | K.LLEATQSADENNR.M                   | 0.70 | F&L (1D-GIST) |
| gij17945305 | FBgn0004117 | 787.91  | 1573.81 | 1573.79 | 0.01  | 0 | 65  | 2.00E-05 | 1 | K.LLTATESEVATQNR.K                  | 0.75 | F&L (1D-GIST) |
| gij28571726 | FBgn0004117 | 789.42  | 1576.82 | 1576.81 | 0.01  | 0 | 34  | 0.026    | 1 | K.LLTATESEVATQNR.K                  | 0.85 | R&H (1D-GIST) |
| gij38048155 | FBgn0004117 | 751.86  | 1501.7  | 1501.7  | 0     | 0 | 51  | 0.00033  | 1 | K.LLEATQSADENNR.M                   | 0.65 | R&L (1D-GIST) |
| gij103432   | FBgn0004169 | 709.86  | 1417.7  | 1417.69 | 0.01  | 0 | 84  | 2.10E-07 | 1 | K.DAGVLGLSSAAMER.N                  | 0.78 | F&L (1D-GIST) |
| gij85169    | FBgn0004169 | 754.87  | 1507.72 | 1507.7  | 0.01  | 1 | 49  | 0.0005   | 1 | K.LETEKYDLEER.Q                     | 1.19 | F&L (1D-GIST) |
| gij85169    | FBgn0004169 | 749.92  | 1497.82 | 1497.81 | 0.01  | 0 | 74  | 2.40E-06 | 1 | R.IKPLAIEGFGEAK.L                   | 0.80 | F&L (1D-GIST) |
| gij85169    | FBgn0004169 | 749.92  | 1497.82 | 1497.81 | 0.01  | 0 | 64  | 2.20E-05 | 1 | R.IKPLAIEGFGEAK.L                   | 0.89 | R&L (1D-GIST) |
| gij1526609  | FBgn0004363 | 1206.59 | 2411.17 | 2411.16 | 0.01  | 0 | 49  | 0.00065  | 1 | K.DFVLHTAVNDGQEFSGSIFQR.T           | 1.07 | F&H (1D-GIST) |
| gij19550069 | FBgn0004363 | 1017.94 | 2033.87 | 2033.89 | -0.02 | 0 | 54  | 4.30E-05 | 1 | K.TSSGIEFNTAGHSNQESGK.V             | 0.83 | F&L (1D-GIST) |
| gij19550069 | FBgn0004363 | 1020.98 | 2039.94 | 2039.93 | 0.01  | 0 | 55  | 8.40E-05 | 1 | K.TSSGIEFNTAGHSNQESGK.V             | 0.86 | R&H (1D-GIST) |
| gij19550069 | FBgn0004363 | 612.28  | 1222.55 | 1222.55 | 0     | 0 | 33  | 0.014    | 1 | K.YQLDDASVR.A                       | 0.78 | R&L (1D-GIST) |
| gij280603   | FBgn0004551 | 947.48  | 2839.41 | 2839.39 | 0.02  | 0 | 46  | 0.0011   | 1 | K.IVEFLQSMNEISAMTGDGVNDAPALK.K      | 0.91 | F&H (1D-GIST) |
| gij280603   | FBgn0004551 | 779.45  | 1556.88 | 1556.87 | 0.01  | 0 | 82  | 2.10E-07 | 1 | K.FSIPVLLDET.LK.F                   | 0.81 | F&L (1D-GIST) |
| gij280603   | FBgn0004551 | 646.36  | 1290.71 | 1290.69 | 0.02  | 0 | 69  | 6.60E-06 | 1 | K.I.LAL.TG.QYGTGR.D                 | 0.85 | F&L (1D-GIST) |
| gij280603   | FBgn0004551 | 779.45  | 1556.88 | 1556.87 | 0.01  | 0 | 74  | 1.30E-06 | 1 | K.FSIPVLLDET.LK.F                   | 0.62 | R&L (1D-GIST) |
| gij280603   | FBgn0004551 | 646.36  | 1290.7  | 1290.69 | 0.01  | 0 | 82  | 4.00E-07 | 1 | K.I.LAL.TG.QYGTGR.D                 | 0.99 | R&L (1D-GIST) |
| gij479373   | FBgn0004574 | 844.88  | 1687.74 | 1687.73 | 0.01  | 0 | 49  | 0.00018  | 1 | K.YSTHLHLAEDCMK.S                   | 0.72 | R&L (1D-GIST) |
| gij479373   | FBgn0004574 | 944.5   | 1886.99 | 1886.98 | 0.01  | 0 | 88  | 1.00E-07 | 1 | R.HEHIAVVSTQVTQNLK.K                | 0.87 | R&L (1D-GIST) |
| gij118187   | FBgn0004629 | 1265.67 | 2529.32 | 2529.28 | 0.04  | 1 | 95  | 1.60E-08 | 1 | R.KEALELLDATLAQLATGDGSPYK.A         | 0.75 | F&L (1D-GIST) |
| gij118187   | FBgn0004629 | 1180.61 | 2359.21 | 2359.18 | 0.03  | 0 | 93  | 2.90E-08 | 1 | K.EALELLDATLAQLATGDGSPYK.A          | 0.96 | F&L (1D-GIST) |
| gij118187   | FBgn0004629 | 787.4   | 2359.18 | 2359.18 | 0     | 0 | 58  | 8.40E-05 | 1 | K.EALELLDATLAQLATGDGSPYK.A          | 0.81 | R&L (1D-GIST) |
| gij118187   | FBgn0004629 | 1180.61 | 2359.21 | 2359.18 | 0.03  | 0 | 79  | 6.50E-07 | 1 | K.EALELLDATLAQLATGDGSPYK.A          | 0.83 | R&L (1D-GIST) |
| gij118187   | FBgn0004629 | 1265.67 | 2529.32 | 2529.28 | 0.03  | 1 | 100 | 4.90E-09 | 1 | R.KEALELLDATLAQLATGDGSPYK.A         | 0.82 | R&L (1D-GIST) |
| gij112683   | FBgn0004907 | 605.81  | 1209.61 | 1209.61 | 0.01  | 0 | 43  | 0.0024   | 1 | R.YLAEVATGDAR.N                     | 0.88 | R&H (1D-GIST) |
| gij112683   | FBgn0004907 | 796.38  | 1590.74 | 1590.74 | 0     | 0 | 31  | 0.032    | 1 | K.SVTETGVELSNEER.N                  | 0.65 | R&L (1D-GIST) |
| gij17647889 | FBgn0005533 | 631.85  | 1261.68 | 1261.67 | 0.01  | 0 | 70  | 7.00E-06 | 1 | K.IAGYVTHLMGR.L                     | 0.93 | F&H (1D-GIST) |
| gij17647889 | FBgn0005533 | 664.85  | 1327.7  | 1327.69 | 0.01  | 1 | 46  | 0.0023   | 1 | R.LTLDFHTNKR.I                      | 0.96 | R&L (1D-GIST) |
| gij17647889 | FBgn0005533 | 630.34  | 1258.66 | 1258.65 | 0.01  | 0 | 81  | 6.90E-07 | 1 | K.IAGYVTHLMGR.L                     | 0.79 | R&L (1D-GIST) |
| gij3929670  | FBgn0005664 | 814.42  | 1626.82 | 1626.81 | 0.01  | 0 | 61  | 4.90E-05 | 1 | K.SSNLQQQQQQQLR.G                   | 0.83 | F&L (1D-GIST) |
| gij3929670  | FBgn0005664 | 639.83  | 1277.64 | 1277.63 | 0.02  | 0 | 60  | 7.10E-05 | 1 | R.FNSLEELQTR.L                      | 0.83 | F&L (1D-GIST) |
| gij3929670  | FBgn0005664 | 721.38  | 1440.75 | 1440.74 | 0.01  | 0 | 45  | 0.0021   | 1 | R.LLNNDLWQLDR.L                     | 1.04 | F&L (1D-GIST) |
| gij3929670  | FBgn0005664 | 799.44  | 1596.86 | 1596.84 | 0.02  | 1 | 57  | 0.00012  | 1 | R.RLLNNDLWQLDR.L                    | 0.71 | F&L (1D-GIST) |
| gij3929670  | FBgn0005664 | 1122.98 | 3365.91 | 3365.89 | 0.02  | 0 | 40  | 0.00026  | 1 | R.LLDQQTLLLAQSLPSIQATVVSHPPTLLATR.L | 1.00 | F&L (1D-GIST) |
| gij3929670  | FBgn0005664 | 1017.87 | 3050.6  | 3050.56 | 0.03  | 0 | 90  | 3.80E-08 | 1 | R.LTAQAIAEAQSLVEAQQASQLQLEAQNRR.R   | 1.18 | F&L (1D-GIST) |
| gij3929670  | FBgn0005664 | 1069.91 | 3206.7  | 3206.66 | 0.04  | 1 | 126 | 7.20E-12 | 1 | R.LTAQAIAEAQSLVEAQQASQLQLEAQNRR.E   | 1.28 | F&L (1D-GIST) |
| gij3929670  | FBgn0005664 | 641.33  | 1280.65 | 1280.64 | 0.01  | 0 | 38  | 0.012    | 1 | R.FNSLEELQTR.L                      | 0.84 | R&H (1D-GIST) |
| gij3929670  | FBgn0005664 | 814.41  | 1626.81 | 1626.81 | 0     | 0 | 69  | 7.30E-06 | 1 | K.SSNLQQQQQQQLR.G                   | 0.84 | R&L (1D-GIST) |

|             |             |         |         |         |       |   |     |          |   |                                      |      |               |
|-------------|-------------|---------|---------|---------|-------|---|-----|----------|---|--------------------------------------|------|---------------|
| gij3929670  | FBgn0005664 | 1122.98 | 3365.92 | 3365.89 | 0.03  | 0 | 52  | 1.90E-05 | 1 | R.LLDQQTLLLAQSLPSIQATVVSHPPPTLLATR.L | 0.83 | R&L (1D-GIST) |
| gij3929670  | FBgn0005664 | 721.38  | 1440.75 | 1440.74 | 0.01  | 0 | 45  | 0.0025   | 1 | R.LLNNDLWQLDR.L                      | 0.96 | R&L (1D-GIST) |
| gij3929670  | FBgn0005664 | 1017.87 | 3050.59 | 3050.56 | 0.03  | 0 | 95  | 1.30E-08 | 1 | R.LTAQAIAEAQSLVEAQQASQLQLEAQR.R      | 0.91 | R&L (1D-GIST) |
| gij3929670  | FBgn0005664 | 799.43  | 1596.85 | 1596.84 | 0.02  | 1 | 46  | 0.0014   | 1 | R.RLNNDLWQLDR.L                      | 0.98 | R&L (1D-GIST) |
| gij24646341 | FBgn0005671 | 1112.09 | 2222.17 | 2222.17 | 0     | 0 | 77  | 9.10E-07 | 1 | K.IPIFSAAGLPHNEIAAQICR.Q             | 1.05 | F&H (1D-GIST) |
| gij24646341 | FBgn0005671 | 787.95  | 1573.88 | 1573.86 | 0.02  | 1 | 44  | 0.0012   | 1 | K.RIPASILAEFYPR.D                    | 1.04 | F&L (1D-GIST) |
| gij24646341 | FBgn0005671 | 1247.12 | 2492.23 | 2492.23 | 0     | 0 | 32  | 0.035    | 1 | R.IYPEEMIQTGISAIDVMNSIAR.G           | 0.91 | F&L (1D-GIST) |
| gij24646341 | FBgn0005671 | 711.4   | 1420.79 | 1420.78 | 0.01  | 0 | 29  | 0.089    | 1 | R.IPASILAEFYPR.D                     | 0.76 | R&H (1D-GIST) |
| gij24646341 | FBgn0005671 | 1110.59 | 2219.16 | 2219.15 | 0.01  | 0 | 107 | 1.10E-09 | 1 | K.IPIFSAAGLPHNEIAAQICR.Q             | 0.99 | R&L (1D-GIST) |
| gij24646341 | FBgn0005671 | 787.94  | 1573.87 | 1573.86 | 0.01  | 1 | 74  | 1.50E-06 | 1 | K.RIPASILAEFYPR.D                    | 1.03 | R&L (1D-GIST) |
| gij17864292 | FBgn0010100 | 950.49  | 1898.97 | 1898.96 | 0.02  | 0 | 50  | 0.00059  | 1 | K.VLYSHLDDPANQDIVR.G                 | 0.99 | F&H (1D-GIST) |
| gij17864292 | FBgn0010100 | 1159.62 | 2317.22 | 2317.2  | 0.02  | 0 | 36  | 0.015    | 1 | K.VAVPSTVHCDHLIEAQIGGPK.D            | 1.30 | R&H (1D-GIST) |
| gij34420414 | FBgn0010217 | 724.85  | 1447.68 | 1447.68 | -0.01 | 0 | 67  | 7.80E-06 | 1 | K.AHGGYSVFAGVGER.T                   | 0.70 | F&L (1D-GIST) |
| gij34420414 | FBgn0010217 | 562.84  | 1123.66 | 1123.65 | 0.01  | 0 | 49  | 0.00024  | 1 | K.LVPLEQTIK.G                        | 0.75 | F&L (1D-GIST) |
| gij2493029  | FBgn0010217 | 771.44  | 1540.86 | 1540.85 | 0.01  | 0 | 88  | 7.60E-08 | 1 | K.TVLIMELINNVAK.A                    | 0.72 | F&L (1D-GIST) |
| gij34420414 | FBgn0010217 | 822.42  | 1642.83 | 1642.81 | 0.02  | 0 | 80  | 7.00E-07 | 1 | K.VALVYQGMNEPPGAR.A                  | 0.87 | F&L (1D-GIST) |
| gij38048209 | FBgn0010217 | 586.84  | 1171.66 | 1171.65 | 0.01  | 0 | 57  | 0.00014  | 1 | K.VVDLLAPYAK.G                       | 0.69 | F&L (1D-GIST) |
| gij38048209 | FBgn0010217 | 705.39  | 1408.77 | 1408.76 | 0.02  | 0 | 64  | 1.70E-05 | 1 | R.IINVIGEPIDER.G                     | 0.76 | F&L (1D-GIST) |
| gij34420414 | FBgn0010217 | 956.48  | 1910.95 | 1910.93 | 0.02  | 0 | 74  | 2.50E-06 | 1 | R.IMDPNIIGQEHYNVAR.G                 | 0.92 | F&L (1D-GIST) |
| gij38048209 | FBgn0010217 | 860.48  | 1718.95 | 1718.93 | 0.02  | 0 | 85  | 9.80E-08 | 1 | R.LVLEVAQHLGENTVR.T                  | 0.80 | F&L (1D-GIST) |
| gij38048209 | FBgn0010217 | 652.83  | 1303.65 | 1303.64 | 0.01  | 0 | 69  | 7.90E-06 | 1 | R.TIAMDGTEGLVR.G                     | 0.75 | F&L (1D-GIST) |
| gij34420414 | FBgn0010217 | 741.41  | 1480.81 | 1480.79 | 0.02  | 0 | 63  | 2.30E-05 | 1 | R.VALTGLTVAEYFR.D                    | 0.71 | F&L (1D-GIST) |
| gij34420414 | FBgn0010217 | 1024.03 | 2046.05 | 2046.02 | 0.03  | 0 | 40  | 0.0064   | 1 | R.FLSQPFQVAEVFTGHAGK.L               | 0.93 | F&L (1D-GIST) |
| gij287945   | FBgn0010217 | 1017.05 | 2032.08 | 2032.06 | 0.02  | 0 | 64  | 2.20E-05 | 1 | R.AIAELGIYPAVDPLDSTSR.I              | 0.73 | R&H (1D-GIST) |
| gij287945   | FBgn0010217 | 1149.07 | 2296.12 | 2296.09 | 0.03  | 0 | 51  | 0.0003   | 1 | R.IPSAVGYQPTLATDMGSMQER.I            | 0.51 | R&H (1D-GIST) |
| gij287945   | FBgn0010217 | 1027.05 | 2052.08 | 2052.06 | 0.03  | 0 | 41  | 0.0055   | 1 | R.FLSQPFQVAEVFTGHAGK.L               | 0.89 | R&H (1D-GIST) |
| gij287945   | FBgn0010217 | 683.02  | 2046.03 | 2046.02 | 0.01  | 0 | 32  | 0.045    | 1 | R.FLSQPFQVAEVFTGHAGK.L               | 0.78 | R&L (1D-GIST) |
| gij34420414 | FBgn0010217 | 724.86  | 1447.7  | 1447.68 | 0.02  | 0 | 54  | 0.00025  | 1 | K.AHGGYSVFAGVGER.T                   | 0.99 | R&L (1D-GIST) |
| gij34420414 | FBgn0010217 | 562.84  | 1123.66 | 1123.65 | 0.01  | 0 | 43  | 0.0011   | 1 | K.LVPLEQTIK.G                        | 0.81 | R&L (1D-GIST) |
| gij34420414 | FBgn0010217 | 771.44  | 1540.86 | 1540.85 | 0.01  | 0 | 75  | 1.40E-06 | 1 | K.TVLIMELINNVAK.A                    | 0.77 | R&L (1D-GIST) |
| gij34420414 | FBgn0010217 | 822.42  | 1642.83 | 1642.81 | 0.01  | 0 | 72  | 4.80E-06 | 1 | K.VALVYQGMNEPPGAR.A                  | 0.77 | R&L (1D-GIST) |
| gij38048209 | FBgn0010217 | 586.84  | 1171.66 | 1171.65 | 0.01  | 0 | 54  | 0.00029  | 1 | K.VVDLLAPYAK.G                       | 0.83 | R&L (1D-GIST) |
| gij38048209 | FBgn0010217 | 705.39  | 1408.76 | 1408.76 | 0.01  | 0 | 70  | 5.40E-06 | 1 | R.IINVIGEPIDER.G                     | 0.84 | R&L (1D-GIST) |
| gij34420414 | FBgn0010217 | 956.48  | 1910.94 | 1910.93 | 0.01  | 0 | 68  | 8.80E-06 | 1 | R.IMDPNIIGQEHYNVAR.G                 | 0.65 | R&L (1D-GIST) |
| gij38048209 | FBgn0010217 | 860.48  | 1718.95 | 1718.93 | 0.02  | 0 | 88  | 5.60E-08 | 1 | R.LVLEVAQHLGENTVR.T                  | 0.76 | R&L (1D-GIST) |
| gij38048209 | FBgn0010217 | 652.83  | 1303.65 | 1303.64 | 0.01  | 0 | 77  | 1.30E-06 | 1 | R.TIAMDGTEGLVR.G                     | 0.87 | R&L (1D-GIST) |
| gij34420414 | FBgn0010217 | 741.41  | 1480.81 | 1480.79 | 0.01  | 0 | 63  | 2.20E-05 | 1 | R.VALTGLTVAEYFR.D                    | 1.11 | R&L (1D-GIST) |
| gij24658560 | FBgn0011211 | 740.94  | 1479.86 | 1479.85 | 0.01  | 0 | 42  | 0.0013   | 1 | K.GIRPAINVGLSVSR.V                   | 0.71 | F&L (1D-GIST) |
| gij24658560 | FBgn0011211 | 692.89  | 1383.77 | 1383.76 | 0.01  | 0 | 75  | 1.90E-06 | 1 | K.TALAITIINQK.R                      | 0.83 | F&L (1D-GIST) |

|             |             |         |         |         |       |   |     |          |   |                             |      |               |
|-------------|-------------|---------|---------|---------|-------|---|-----|----------|---|-----------------------------|------|---------------|
| gij24658560 | FBgn0011211 | 651.84  | 1301.66 | 1301.65 | 0.02  | 0 | 50  | 0.00071  | 1 | R.SAEISNILEER.I             | 0.71 | F&L (1D-GIST) |
| gij24658560 | FBgn0011211 | 826.95  | 1651.9  | 1651.88 | 0.02  | 0 | 50  | 0.00057  | 1 | R.TGAIVDVPVGDDELLGR.V       | 0.85 | F&L (1D-GIST) |
| gij24658560 | FBgn0011211 | 521.8   | 1041.59 | 1041.58 | 0.01  | 0 | 57  | 0.00014  | 1 | R.VLSIGDGIAR.V              | 0.66 | F&L (1D-GIST) |
| gij24658560 | FBgn0011211 | 628.34  | 1254.66 | 1254.65 | 0.01  | 0 | 86  | 1.60E-07 | 1 | R.VVDALGNAIDGK.G            | 0.73 | F&L (1D-GIST) |
| gij24658560 | FBgn0011211 | 803.08  | 2406.21 | 2406.18 | 0.03  | 0 | 62  | 4.00E-05 | 1 | R.EVAFAQFGSDDLDAATQQLLR.G   | 1.25 | F&L (1D-GIST) |
| gij24658560 | FBgn0011211 | 687.37  | 1372.72 | 1372.71 | 0.01  | 0 | 33  | 0.041    | 1 | K.TSEQALLDTIAK.D            | 0.60 | R&L (1D-GIST) |
| gij24658560 | FBgn0011211 | 740.94  | 1479.86 | 1479.85 | 0.01  | 0 | 34  | 0.0096   | 1 | K.GIRPAINVGLSVSR.V          | 0.83 | R&L (1D-GIST) |
| gij24658560 | FBgn0011211 | 692.89  | 1383.78 | 1383.76 | 0.01  | 0 | 72  | 3.90E-06 | 1 | K.TALAITIINQK.R             | 0.76 | R&L (1D-GIST) |
| gij24658560 | FBgn0011211 | 803.07  | 2406.2  | 2406.18 | 0.02  | 0 | 59  | 8.90E-05 | 1 | R.EVAFAQFGSDDLDAATQQLLR.G   | 0.98 | R&L (1D-GIST) |
| gij24658560 | FBgn0011211 | 651.84  | 1301.66 | 1301.65 | 0.01  | 0 | 58  | 0.00011  | 1 | R.SAEISNILEER.I             | 0.83 | R&L (1D-GIST) |
| gij24658560 | FBgn0011211 | 826.96  | 1651.9  | 1651.88 | 0.02  | 0 | 39  | 0.0078   | 1 | R.TGAIVDVPVGDDELLGR.V       | 0.75 | R&L (1D-GIST) |
| gij24658560 | FBgn0011211 | 628.34  | 1254.66 | 1254.65 | 0.01  | 0 | 109 | 8.60E-10 | 1 | R.VVDALGNAIDGK.G            | 0.77 | R&L (1D-GIST) |
| gij28573630 | FBgn0011643 | 1055.48 | 2108.95 | 2108.93 | 0.02  | 0 | 102 | 1.50E-09 | 1 | K.GYGFGGGAGCLSTDTGAHLNR.E   | 1.12 | F&L (1D-GIST) |
| gij28573630 | FBgn0011643 | 1120.01 | 2238    | 2237.98 | 0.02  | 1 | 90  | 1.90E-08 | 1 | K.GYGFGGGAGCLSTDTGAHLNR.E-  | 0.94 | F&L (1D-GIST) |
| gij28573630 | FBgn0011643 | 1055.48 | 2108.95 | 2108.93 | 0.02  | 0 | 93  | 1.20E-08 | 1 | K.GYGFGGGAGCLSTDTGAHLNR.E   | 0.77 | R&L (1D-GIST) |
| gij28573630 | FBgn0011643 | 1120    | 2237.99 | 2237.98 | 0.01  | 1 | 80  | 1.50E-07 | 1 | K.GYGFGGGAGCLSTDTGAHLNR.E-  | 0.74 | R&L (1D-GIST) |
| gij28573630 | FBgn0011643 | 703.99  | 2108.94 | 2108.93 | 0.01  | 0 | 81  | 1.80E-07 | 1 | K.GYGFGGGAGCLSTDTGAHLNR.E   | 1.02 | R&L (1D-GIST) |
| gij28573630 | FBgn0011643 | 747     | 2237.98 | 2237.98 | 0.01  | 1 | 67  | 2.80E-06 | 1 | K.GYGFGGGAGCLSTDTGAHLNR.E-  | 0.95 | R&L (1D-GIST) |
| gij3851652  | FBgn0011693 | 1191.03 | 2380.04 | 2380.04 | 0     | 0 | 30  | 0.016    | 1 | K.FVTVCPGATMTDMFTNFTEK.I    | 0.50 | F&L (1D-GIST) |
| gij3851652  | FBgn0011693 | 756.87  | 1511.73 | 1511.71 | 0.02  | 0 | 37  | 0.0079   | 1 | K.IIFPETSDETYR.I            | 0.37 | F&L (1D-GIST) |
| gij3851652  | FBgn0011693 | 1191.03 | 2380.05 | 2380.04 | 0.01  | 0 | 58  | 3.30E-05 | 1 | K.FVTVCPGATMTDMFTNFTEK.I    | 0.67 | R&L (1D-GIST) |
| gij17136986 | FBgn0011726 | 776.87  | 1551.73 | 1551.71 | 0.02  | 0 | 41  | 0.0029   | 1 | K.LFLMSWCPDTAK.V            | 0.52 | F&L (1D-GIST) |
| gij17136986 | FBgn0011726 | 699.86  | 1397.7  | 1397.69 | 0.01  | 0 | 33  | 0.027    | 1 | K.YIQATDLSEASR.E            | 1.00 | R&H (1D-GIST) |
| gij38048613 | FBgn0011726 | 776.87  | 1551.73 | 1551.71 | 0.02  | 0 | 45  | 0.0012   | 1 | K.LFLMSWCPDTAK.V            | 1.00 | R&L (1D-GIST) |
| gij929571   | FBgn0013334 | 742.91  | 1483.81 | 1483.79 | 0.02  | 1 | 46  | 0.0017   | 1 | K.IKEEILGLSQDR.R            | 0.58 | F&L (1D-GIST) |
| gij929571   | FBgn0013334 | 820.96  | 1639.91 | 1639.89 | 0.02  | 2 | 28  | 0.062    | 1 | K.IKEEILGLSQDRR.N           | 0.96 | F&L (1D-GIST) |
| gij929571   | FBgn0013334 | 742.91  | 1483.8  | 1483.79 | 0.02  | 1 | 41  | 0.0049   | 1 | K.IKEEILGLSQDR.R            | 0.99 | R&L (1D-GIST) |
| gij929571   | FBgn0013334 | 820.96  | 1639.91 | 1639.89 | 0.02  | 2 | 28  | 0.072    | 1 | K.IKEEILGLSQDRR.N           | 0.95 | R&L (1D-GIST) |
| gij2119083  | FBgn0014027 | 910.01  | 1818.01 | 1817.98 | 0.02  | 0 | 66  | 7.40E-06 | 1 | K.LVLTALCNEHQIPLIR.V        | 1.09 | F&L (1D-GIST) |
| gij2119083  | FBgn0014027 | 901.97  | 1801.93 | 1801.91 | 0.02  | 0 | 50  | 0.00076  | 1 | K.SLIADGLVHGHIQACK.A        | 0.76 | F&L (1D-GIST) |
| gij2119083  | FBgn0014027 | 910.01  | 1818    | 1817.98 | 0.02  | 0 | 67  | 7.80E-06 | 1 | K.LVLTALCNEHQIPLIR.V        | 0.84 | R&L (1D-GIST) |
| gij2119083  | FBgn0014027 | 901.98  | 1801.94 | 1801.91 | 0.02  | 0 | 48  | 0.0011   | 1 | K.SLIADGLVHGHIQACK.A        | 0.97 | R&L (1D-GIST) |
| gij7460239  | FBgn0015390 | 1283.08 | 2564.14 | 2564.16 | -0.03 | 0 | 38  | 0.0019   | 1 | K.ATEHVSEHVTTTGESSTETSQEK.S | 0.89 | F&H (1D-GIST) |
| gij7460239  | FBgn0015390 | 853.72  | 2558.13 | 2558.13 | 0.01  | 0 | 57  | 2.60E-05 | 1 | K.ATEHVSEHVTTTGESSTETSQEK.S | 0.60 | F&L (1D-GIST) |
| gij7460239  | FBgn0015390 | 684.69  | 2051.06 | 2051.04 | 0.03  | 1 | 42  | 0.0044   | 1 | K.EASRPASVAESIKDEAEK.S      | 0.52 | R&H (1D-GIST) |
| gij7460239  | FBgn0015390 | 547.78  | 1093.55 | 1093.55 | 0     | 0 | 34  | 0.019    | 1 | R.ALEEHVQAR.G               | 1.07 | R&L (1D-GIST) |
| gij7460239  | FBgn0015390 | 853.72  | 2558.13 | 2558.13 | 0     | 0 | 36  | 0.0029   | 1 | K.ATEHVSEHVTTTGESSTETSQEK.S | 0.76 | R&L (1D-GIST) |
| gij7460239  | FBgn0015390 | 1022.01 | 2042    | 2041.98 | 0.02  | 1 | 82  | 4.70E-07 | 1 | K.EASRPASVAESIKDEAEK.S      | 0.78 | R&L (1D-GIST) |
| gij7511958  | FBgn0016724 | 584.85  | 1167.68 | 1167.67 | 0.01  | 0 | 46  | 0.00099  | 1 | R.ILDIYNSLK.E               | 1.29 | F&H (1D-GIST) |

|             |             |         |         |         |       |   |     |          |   |                                  |      |               |
|-------------|-------------|---------|---------|---------|-------|---|-----|----------|---|----------------------------------|------|---------------|
| gij7511958  | FBgn0016724 | 919.53  | 1837.04 | 1837.02 | 0.02  | 0 | 29  | 0.031    | 1 | K.EKPIIISSIAELLGDR.K             | 1.42 | F&L (1D-GIST) |
| gij7511958  | FBgn0016724 | 883.46  | 1764.91 | 1764.9  | 0.02  | 0 | 102 | 3.80E-09 | 1 | K.MLNQITSSLADTLFK.T              | 1.11 | F&L (1D-GIST) |
| gij7511958  | FBgn0016724 | 1022.1  | 2042.18 | 2042.16 | 0.02  | 0 | 28  | 0.052    | 1 | K.AIGEIVKPINDAAQEVIK.I           | 0.91 | R&H (1D-GIST) |
| gij7511958  | FBgn0016724 | 665.33  | 1328.64 | 1328.64 | 0     | 0 | 32  | 0.03     | 1 | K.GIHTQEAFSQK.W                  | 0.90 | R&L (1D-GIST) |
| gij7511958  | FBgn0016724 | 731.86  | 1461.72 | 1461.71 | 0.01  | 1 | 59  | 7.90E-05 | 1 | K.RQDFIDGTAEVK.L                 | 1.16 | R&L (1D-GIST) |
| gij7511958  | FBgn0016724 | 1105.19 | 3312.56 | 3312.56 | 0     | 0 | 46  | 0.00066  | 1 | R.AVVSLQSGIEAEHEVDVFGMCPHTSTSK.V | 1.01 | R&L (1D-GIST) |
| gij7511958  | FBgn0016724 | 597.84  | 1193.66 | 1193.64 | 0.01  | 1 | 57  | 8.20E-05 | 1 | R.KVYLDGLFR.T                    | 1.51 | R&L (1D-GIST) |
| gij7511958  | FBgn0016724 | 919.53  | 1837.04 | 1837.02 | 0.02  | 0 | 101 | 1.90E-09 | 1 | K.EKPIIISSIAELLGDR.K             | 0.91 | R&L (1D-GIST) |
| gij7511958  | FBgn0016724 | 883.46  | 1764.91 | 1764.9  | 0.01  | 0 | 98  | 8.80E-09 | 1 | K.MLNQITSSLADTLFK.T              | 0.99 | R&L (1D-GIST) |
| gij7511958  | FBgn0016724 | 581.82  | 1161.63 | 1161.63 | 0.01  | 0 | 57  | 0.00014  | 1 | R.ILDIYNSLK.E                    | 0.82 | R&L (1D-GIST) |
| gij2058301  | FBgn0020235 | 620.32  | 1238.62 | 1238.62 | 0     | 0 | 58  | 6.60E-05 | 1 | R.GLCGAVHTGVAR.L                 | 0.77 | F&L (1D-GIST) |
| gij24651129 | FBgn0020235 | 630.85  | 1259.68 | 1259.67 | 0.01  | 0 | 40  | 0.0078   | 1 | K.NILMVANEVGR.L                  | 0.77 | R&H (1D-GIST) |
| gij24651129 | FBgn0020235 | 620.32  | 1238.62 | 1238.62 | 0     | 0 | 56  | 0.00011  | 1 | R.GLCGAVHTGVAR.L                 | 0.81 | R&L (1D-GIST) |
| gij24647885 | FBgn0020238 | 754.9   | 1507.79 | 1507.77 | 0.02  | 0 | 48  | 0.001    | 1 | R.DICSDILNVLEK.H                 | 0.73 | F&H (1D-GIST) |
| gij24647885 | FBgn0020238 | 1086.51 | 2171    | 2170.98 | 0.02  | 0 | 66  | 8.60E-06 | 1 | K.AAFDDAIAELDTLSEESYK.D          | 0.89 | F&L (1D-GIST) |
| gij24647885 | FBgn0020238 | 930.97  | 1859.93 | 1859.92 | 0.01  | 0 | 82  | 4.60E-07 | 1 | K.AASDIAMNDLPPTHPIR.L            | 0.91 | F&L (1D-GIST) |
| gij24647885 | FBgn0020238 | 721.36  | 1440.71 | 1440.69 | 0.02  | 1 | 65  | 1.60E-05 | 1 | R.YLAEFATGSDRK.D                 | 0.95 | F&L (1D-GIST) |
| gij24647885 | FBgn0020238 | 724.37  | 1446.73 | 1446.73 | 0.01  | 1 | 44  | 0.0025   | 1 | R.YLAEFATGSDRK.D                 | 0.87 | R&H (1D-GIST) |
| gij24647885 | FBgn0020238 | 1086.51 | 2171.01 | 2170.98 | 0.03  | 0 | 101 | 2.60E-09 | 1 | K.AAFDDAIAELDTLSEESYK.D          | 0.97 | R&L (1D-GIST) |
| gij24647885 | FBgn0020238 | 751.88  | 1501.75 | 1501.73 | 0.02  | 0 | 47  | 0.0012   | 1 | R.DICSDILNVLEK.H                 | 1.12 | R&L (1D-GIST) |
| gij3337433  | FBgn0024923 | 766.91  | 1531.8  | 1531.8  | 0.01  | 0 | 67  | 1.30E-05 | 1 | R.IVSQLLTLMGDMK.K                | 0.93 | F&L (1D-GIST) |
| gij3337433  | FBgn0024923 | 852.43  | 1702.84 | 1702.83 | 0.01  | 0 | 29  | 0.082    | 1 | R.VINQILTEMDGMGAK.K              | 0.76 | F&L (1D-GIST) |
| gij3337433  | FBgn0024923 | 766.91  | 1531.81 | 1531.8  | 0.01  | 0 | 83  | 3.20E-07 | 1 | R.IVSQLLTLMGDMK.K                | 0.75 | R&L (1D-GIST) |
| gij24644504 | FBgn0026077 | 1094.95 | 2187.89 | 2187.9  | -0.02 | 0 | 38  | 0.00027  | 1 | K.YLTENCYDLHNVDCGDR.T            | 1.11 | F&H (1D-GIST) |
| gij24644504 | FBgn0026077 | 732.41  | 1462.81 | 1462.79 | 0.02  | 1 | 79  | 8.40E-07 | 1 | R.KSELLAGLNSEGR.T                | 1.03 | F&H (1D-GIST) |
| gij24644504 | FBgn0026077 | 729.39  | 1456.77 | 1456.75 | 0.01  | 1 | 91  | 6.20E-08 | 1 | R.KSELLAGLNSEGR.T                | 1.01 | R&L (1D-GIST) |
| gij4753683  | FBgn0026418 | 693.7   | 2078.09 | 2078.08 | 0.01  | 1 | 31  | 0.06     | 1 | R.KFNDPHVQHELTSIPAR.V            | 0.89 | F&H (1D-GIST) |
| gij4753683  | FBgn0026418 | 790.47  | 1578.93 | 1578.91 | 0.02  | 0 | 42  | 0.001    | 1 | K.ALLDAAQIAGLNVLR.L              | 0.97 | F&L (1D-GIST) |
| gij4753683  | FBgn0026418 | 790.47  | 1578.92 | 1578.91 | 0.01  | 0 | 39  | 0.0024   | 1 | K.ALLDAAQIAGLNVLR.L              | 0.77 | R&L (1D-GIST) |
| gij18858089 | FBgn0028342 | 783.95  | 1565.88 | 1565.87 | 0.02  | 0 | 75  | 1.10E-06 | 1 | K.AQAAIAVEVAELVK.A               | 0.93 | R&L (1D-GIST) |
| gij18858089 | FBgn0028342 | 775.78  | 2324.31 | 2324.27 | 0.03  | 0 | 51  | 0.00015  | 1 | K.HVPTLAVLKPQVQVVENDEGK.T        | 0.73 | R&L (1D-GIST) |
| gij24583079 | FBgn0028479 | 639.86  | 1277.72 | 1277.71 | 0.01  | 0 | 30  | 0.053    | 1 | R.ILSTMLSEAIR.L                  | 0.70 | F&H (1D-GIST) |
| gij24583079 | FBgn0028479 | 941.05  | 1880.08 | 1880.06 | 0.02  | 0 | 52  | 0.00013  | 1 | K.LGLPEVMLGLLPGGGTVR.L           | 0.94 | R&H (1D-GIST) |
| gij24583079 | FBgn0028479 | 639.87  | 1277.72 | 1277.71 | 0.01  | 0 | 30  | 0.058    | 1 | R.ILSTMLSEAIR.L                  | 0.89 | R&H (1D-GIST) |
| gij24583531 | FBgn0032299 | 1061.9  | 3182.69 | 3182.66 | 0.03  | 0 | 53  | 0.00015  | 1 | R.INLFEILGDQVPSEVINNLQSQVDQIGR.N | 1.33 | F&H (1D-GIST) |
| gij24583531 | FBgn0032299 | 1099.92 | 3296.73 | 3296.71 | 0.02  | 1 | 36  | 0.015    | 1 | R.INLFEILGDQVPSEVINNLQSQVDQIGR.N | 1.87 | F&H (1D-GIST) |
| gij24583531 | FBgn0032299 | 1061.9  | 3182.69 | 3182.66 | 0.02  | 0 | 35  | 0.01     | 1 | R.INLFEILGDQVPSEVINNLQSQVDQIGR.N | 0.96 | R&H (1D-GIST) |
| gij19921806 | FBgn0033268 | 673.39  | 1344.77 | 1344.75 | 0.01  | 0 | 57  | 0.00011  | 1 | K.VENLVAQLGQGK.E                 | 0.83 | F&H (1D-GIST) |
| gij19921806 | FBgn0033268 | 881.99  | 1761.97 | 1761.95 | 0.02  | 1 | 93  | 2.40E-08 | 1 | K.VENLVAQLGQGKEDK.A              | 0.74 | F&H (1D-GIST) |

|             |             |         |         |         |       |   |    |          |   |                                            |      |               |
|-------------|-------------|---------|---------|---------|-------|---|----|----------|---|--------------------------------------------|------|---------------|
| gij19921806 | FBgn0033268 | 632.87  | 1263.73 | 1263.72 | 0.01  | 0 | 31 | 0.022    | 1 | K.NLPLVQAAVQK.N                            | 0.84 | F&L (1D-GIST) |
| gij19921806 | FBgn0033268 | 632.87  | 1263.73 | 1263.72 | 0.01  | 0 | 63 | 1.20E-05 | 1 | K.NLPLVQAAVQK.N                            | 1.06 | R&L (1D-GIST) |
| gij19921806 | FBgn0033268 | 670.37  | 1338.73 | 1338.71 | 0.01  | 0 | 49 | 0.00075  | 1 | K.VENLVAQLGQGK.E                           | 0.90 | R&L (1D-GIST) |
| gij19921806 | FBgn0033268 | 877.46  | 1752.91 | 1752.89 | 0.02  | 1 | 85 | 1.80E-07 | 1 | K.VENLVAQLGQGKEDK.A                        | 0.88 | R&L (1D-GIST) |
| gij21357213 | FBgn0036619 | 962     | 1921.99 | 1921.97 | 0.01  | 1 | 30 | 0.057    | 1 | K.GKAPLPVTDTEEVQQR.L                       | 1.49 | F&L (1D-GIST) |
| gij21357213 | FBgn0036619 | 496.79  | 991.56  | 991.56  | 0     | 0 | 38 | 0.007    | 1 | R.LNHLNALR.E                               | 0.88 | F&L (1D-GIST) |
| gij21357213 | FBgn0036619 | 849.95  | 1697.88 | 1697.87 | 0.02  | 0 | 32 | 0.043    | 1 | K.APLPVTDTTEEVQQR.L                        | 1.12 | R&H (1D-GIST) |
| gij21357213 | FBgn0036619 | 496.79  | 991.56  | 991.56  | 0     | 0 | 44 | 0.0019   | 1 | R.LNHLNALR.E                               | 1.12 | R&L (1D-GIST) |
| gij24665395 | FBgn0036642 | 814.95  | 1627.9  | 1627.88 | 0.01  | 0 | 29 | 0.065    | 1 | K.EALAFaILEQALGAK.A                        | 0.49 | F&L (1D-GIST) |
| gij24665395 | FBgn0036642 | 767.9   | 1533.8  | 1533.79 | 0.01  | 0 | 62 | 4.20E-05 | 1 | R.AVVAVAGQGAAASNHK.E                       | 0.47 | F&L (1D-GIST) |
| gij24665395 | FBgn0036642 | 822.91  | 1643.8  | 1643.79 | 0.01  | 0 | 87 | 1.10E-07 | 1 | R.NESYDIQGASHLLR.L                         | 0.71 | F&L (1D-GIST) |
| gij24665395 | FBgn0036642 | 949.03  | 1896.04 | 1896.02 | 0.03  | 0 | 29 | 0.058    | 1 | K.LAVGAIGHLANVPYASDLA.-                    | 0.67 | R&H (1D-GIST) |
| gij24665395 | FBgn0036642 | 767.9   | 1533.79 | 1533.79 | 0     | 0 | 65 | 2.10E-05 | 1 | R.AVVAVAGQGAAASNHK.E                       | 1.00 | R&L (1D-GIST) |
| gij24665395 | FBgn0036642 | 822.91  | 1643.8  | 1643.79 | 0.01  | 0 | 77 | 1.20E-06 | 1 | R.NESYDIQGASHLLR.L                         | 0.65 | R&L (1D-GIST) |
| gij21357643 | FBgn0037146 | 927     | 1851.98 | 1851.97 | 0.01  | 0 | 92 | 4.30E-08 | 1 | K.EALATVGAEHAVSLVSTR.E                     | 1.47 | F&L (1D-GIST) |
| gij21357643 | FBgn0037146 | 926.97  | 1851.93 | 1851.91 | 0.01  | 0 | 82 | 3.50E-07 | 1 | R.LASIVEQVAECHLEGR.E                       | 1.17 | R&L (1D-GIST) |
| gij21357643 | FBgn0037146 | 927     | 1851.99 | 1851.97 | 0.02  | 0 | 93 | 2.70E-08 | 1 | K.EALATVGAEHAVSLVSTR.E                     | 0.76 | R&L (1D-GIST) |
| gij24647881 | FBgn0038587 | 791.92  | 1581.83 | 1581.82 | 0.01  | 0 | 49 | 0.00078  | 1 | K.TAGFIGADQLGDSLK.G                        | 0.68 | F&H (1D-GIST) |
| gij24647881 | FBgn0038587 | 625.87  | 1249.73 | 1249.71 | 0.02  | 0 | 36 | 0.012    | 1 | R.LFGVSTLDVVR.A                            | 0.82 | F&H (1D-GIST) |
| gij24647881 | FBgn0038587 | 1371.11 | 4110.32 | 4110.28 | 0.04  | 0 | 31 | 0.0028   | 1 | R.AFIGHALGVDPQTVQIPVIGGSHGVTLPVLSQSQPLFK.G | 1.34 | F&H (1D-GIST) |
| gij24647881 | FBgn0038587 | 590.85  | 1179.68 | 1179.68 | 0.01  | 0 | 37 | 0.0051   | 1 | K.LLEAAIPELK.K                             | 0.42 | F&L (1D-GIST) |
| gij24647881 | FBgn0038587 | 680.43  | 1358.85 | 1358.84 | 0.01  | 1 | 39 | 0.0016   | 1 | K.KLEAAIPELK.K                             | 0.86 | R&H (1D-GIST) |
| gij24647881 | FBgn0038587 | 625.86  | 1249.7  | 1249.71 | -0.01 | 0 | 47 | 0.0013   | 1 | R.LFGVSTLDVVR.A                            | 1.06 | R&H (1D-GIST) |
| gij24647881 | FBgn0038587 | 590.85  | 1179.68 | 1179.68 | 0.01  | 0 | 34 | 0.011    | 1 | K.LLEAAIPELK.K                             | 0.74 | R&L (1D-GIST) |
| gij24647881 | FBgn0038587 | 788.9   | 1575.79 | 1575.78 | 0.02  | 0 | 83 | 3.10E-07 | 1 | K.TAGFIGADQLGDSLK.G                        | 1.09 | R&L (1D-GIST) |
| gij45553457 | FBgn0038947 | 792.42  | 2374.22 | 2374.21 | 0.01  | 0 | 40 | 0.0063   | 1 | K.LAQHVPTLHPTSEELSIGNMR.F                  | 0.73 | R&H (1D-GIST) |
| gij7271164  | FBgn0038947 | 622.85  | 1243.69 | 1243.68 | 0.01  | 0 | 36 | 0.019    | 1 | K.LLFLGLDNAGK.T                            | 0.95 | R&L (1D-GIST) |
| gij24651102 | FBgn0039685 | 615.83  | 1229.65 | 1229.64 | 0.01  | 0 | 38 | 0.009    | 1 | K.VHASEELVEK.Y                             | 0.86 | F&H (1D-GIST) |
| gij24651102 | FBgn0039685 | 595.78  | 1189.54 | 1189.54 | 0     | 0 | 35 | 0.0083   | 1 | K.THEDLTNYR.T                              | 0.82 | F&L (1D-GIST) |
| gij24651102 | FBgn0039685 | 802.75  | 2405.22 | 2405.2  | 0.03  | 0 | 67 | 1.60E-05 | 1 | K.IHIQLAGPGVEVHESDEVHQK.I                  | 1.10 | F&L (1D-GIST) |
| gij24651102 | FBgn0039685 | 595.78  | 1189.54 | 1189.54 | 0     | 0 | 31 | 0.022    | 1 | K.THEDLTNYR.T                              | 1.22 | R&L (1D-GIST) |
| gij24651102 | FBgn0039685 | 612.81  | 1223.61 | 1223.6  | 0     | 0 | 39 | 0.0065   | 1 | K.VHASEELVEK.Y                             | 0.88 | R&L (1D-GIST) |
| gij24651183 | FBgn0039713 | 861.46  | 1720.9  | 1720.88 | 0.02  | 0 | 56 | 0.00017  | 1 | R.IADVYNASNNELVR.T                         | 0.79 | R&H (1D-GIST) |
| gij24651183 | FBgn0039713 | 761.37  | 1520.72 | 1520.71 | 0.01  | 0 | 32 | 0.027    | 1 | K.VEQALEDQFTSGR.I                          | 0.78 | R&L (1D-GIST) |
| gij17648125 | FBgn0040064 | 825.91  | 1649.81 | 1649.8  | 0.01  | 0 | 52 | 0.00037  | 1 | K.EVDFVVEHPRPK.T                           | 1.01 | F&L (1D-GIST) |
| gij17648125 | FBgn0040064 | 881.45  | 1760.88 | 1760.87 | 0.02  | 0 | 48 | 0.0014   | 1 | K.LPMALTAENLADQYK.I                        | 0.94 | R&L (1D-GIST) |
| gij17648125 | FBgn0040064 | 1064.58 | 2127.14 | 2127.13 | 0.02  | 0 | 86 | 1.30E-07 | 1 | R.HVGLNCGVPIEKPALGINR.L                    | 1.53 | R&L (1D-GIST) |
| gij17648125 | FBgn0040064 | 825.91  | 1649.81 | 1649.8  | 0.01  | 0 | 61 | 5.10E-05 | 1 | K.EVDFVVEHPRPK.T                           | 1.06 | R&L (1D-GIST) |
| gij24661073 | FBgn0052029 | 628.85  | 1255.69 | 1255.68 | 0.01  | 1 | 62 | 5.30E-05 | 1 | R.IKDTVAEQIR.A                             | 0.73 | F&L (1D-GIST) |

|             |             |         |         |         |       |   |    |          |   |                              |          |                    |
|-------------|-------------|---------|---------|---------|-------|---|----|----------|---|------------------------------|----------|--------------------|
| gij24661073 | FBgn0052029 | 937.8   | 2810.37 | 2810.35 | 0.02  | 0 | 44 | 0.002    | 1 | R.DYQQYQPQQAAYRPPAQAAPQPPR.R | 1.19     | F&L (1D-GIST)      |
| gij24661073 | FBgn0052029 | 628.85  | 1255.68 | 1255.68 | 0.01  | 1 | 38 | 0.014    | 1 | R.IKDTVAEQIR.A               | 0.83     | R&L (1D-GIST)      |
| gij25013110 | FBgn0064779 | 493.29  | 984.57  | 984.56  | 0.01  | 0 | 44 | 0.0037   | 1 | K.ELGVGLVTR.K                | 0.86     | R&L (1D-GIST)      |
| gij25013110 | FBgn0064779 | 761.36  | 1520.71 | 1520.7  | 0.01  | 0 | 34 | 0.015    | 1 | K.LGVEFDEETLDGR.N            | 0.96     | R&L (1D-GIST)      |
| gij7287844  | FBgn0000055 | 604.34  | 1206.66 | 1206.66 | 0     | 0 | 47 | 0.00026  | 1 | AAVVNFTSSLAK                 | 3.42E+07 | parkin null-Rep II |
| gij7287844  | FBgn0000055 | 604.34  | 1206.66 | 1206.66 | 0     | 0 | 48 | 0.00023  | 1 | AAVVNFTSSLAK                 | 3.79E+07 | control-Rep II     |
| gij7287844  | FBgn0000055 | 604.34  | 1206.66 | 1206.66 | 0     | 0 | 40 | 0.0014   | 1 | AAVVNFTSSLAK                 | 4.12E+07 | parkin null-Rep I  |
| gij7287844  | FBgn0000055 | 604.34  | 1206.66 | 1206.66 | 0     | 0 | 38 | 0.0022   | 1 | AAVVNFTSSLAK                 | 6.08E+07 | control-Rep I      |
| gij7287844  | FBgn0000055 | 678.87  | 1355.72 | 1355.72 | 0     | 0 | 43 | 0.00065  | 1 | AIELNQNGAIWK                 | 1.25E+07 | parkin null-Rep II |
| gij7287844  | FBgn0000055 | 678.86  | 1355.71 | 1355.72 | -0.01 | 0 | 48 | 0.00027  | 1 | AIELNQNGAIWK                 | 1.51E+07 | parkin null-Rep I  |
| gij7287844  | FBgn0000055 | 678.87  | 1355.73 | 1355.72 | 0.01  | 0 | 34 | 0.0068   | 1 | AIELNQNGAIWK                 | 1.53E+07 | control-Rep II     |
| gij7287844  | FBgn0000055 | 678.87  | 1355.72 | 1355.72 | 0     | 0 | 42 | 0.001    | 1 | AIELNQNGAIWK                 | 1.83E+07 | control-Rep I      |
| gij7287844  | FBgn0000055 | 1018.86 | 3053.56 | 3053.56 | -0.01 | 1 | 42 | 0.00052  | 1 | KGGPGGHCNIGSVTFGNAIQVPVYSGTK | 1.85E+06 | parkin null-Rep II |
| gij7287844  | FBgn0000055 | 1018.85 | 3053.53 | 3053.56 | -0.04 | 1 | 40 | 0.00088  | 1 | KGGPGGHCNIGSVTFGNAIQVPVYSGTK | 2.63E+06 | control-Rep II     |
| gij7287844  | FBgn0000055 | 744.42  | 1486.82 | 1486.8  | 0.02  | 0 | 51 | 9.90E-05 | 1 | LDLGTLEAIQWTK                | 7.62E+06 | control-Rep II     |
| gij7287844  | FBgn0000055 | 744.41  | 1486.81 | 1486.8  | 0     | 0 | 73 | 8.10E-07 | 1 | LDLGTLEAIQWTK                | 9.06E+06 | parkin null-Rep II |
| gij7287844  | FBgn0000055 | 744.41  | 1486.81 | 1486.8  | 0.01  | 0 | 48 | 0.00026  | 1 | LDLGTLEAIQWTK                | 1.04E+07 | parkin null-Rep I  |
| gij7287844  | FBgn0000055 | 666.02  | 1995.03 | 1995.02 | 0     | 0 | 38 | 0.0017   | 1 | LLAHTQPSLACAENFVK            | 2.99E+08 | parkin null-Rep II |
| gij7287844  | FBgn0000055 | 666.02  | 1995.03 | 1995.02 | 0     | 0 | 42 | 0.00073  | 1 | LLAHTQPSLACAENFVK            | 3.02E+08 | parkin null-Rep I  |
| gij7287844  | FBgn0000055 | 666.02  | 1995.03 | 1995.02 | 0     | 0 | 43 | 0.00055  | 1 | LLAHTQPSLACAENFVK            | 3.30E+08 | control-Rep II     |
| gij7287844  | FBgn0000055 | 666.02  | 1995.03 | 1995.02 | 0     | 0 | 48 | 0.00021  | 1 | LLAHTQPSLACAENFVK            | 3.71E+08 | control-Rep I      |
| gij7287844  | FBgn0000055 | 871.47  | 2611.39 | 2611.36 | 0.03  | 1 | 38 | 0.0018   | 1 | TIAVNYTGLVNTTTAILDFWDKR      | 7.84E+06 | parkin null-Rep II |
| gij7287844  | FBgn0000055 | 871.47  | 2611.38 | 2611.36 | 0.01  | 1 | 30 | 0.014    | 1 | TIAVNYTGLVNTTTAILDFWDKR      | 8.07E+06 | control-Rep II     |
| gij7287844  | FBgn0000055 | 871.47  | 2611.39 | 2611.36 | 0.02  | 1 | 35 | 0.0095   | 1 | TIAVNYTGLVNTTTAILDFWDKR      | 9.21E+06 | parkin null-Rep I  |
| gij7287844  | FBgn0000055 | 871.47  | 2611.4  | 2611.36 | 0.03  | 1 | 42 | 0.00072  | 1 | TIAVNYTGLVNTTTAILDFWDKR      | 1.23E+07 | control-Rep I      |
| gij7287844  | FBgn0000055 | 772.06  | 2313.16 | 2313.16 | -0.01 | 0 | 44 | 0.00052  | 1 | TTLVHTFNSWLDVEPQVAEK         | 2.13E+07 | parkin null-Rep I  |
| gij7287844  | FBgn0000055 | 772.07  | 2313.18 | 2313.16 | 0.01  | 0 | 55 | 4.20E-05 | 1 | TTLVHTFNSWLDVEPQVAEK         | 2.17E+07 | control-Rep II     |
| gij7287844  | FBgn0000055 | 772.06  | 2313.17 | 2313.16 | 0     | 0 | 56 | 3.90E-05 | 1 | TTLVHTFNSWLDVEPQVAEK         | 2.43E+07 | parkin null-Rep II |
| gij7287844  | FBgn0000055 | 772.06  | 2313.17 | 2313.16 | 0     | 0 | 65 | 4.30E-06 | 1 | TTLVHTFNSWLDVEPQVAEK         | 2.84E+07 | control-Rep I      |
| gij7287844  | FBgn0000055 | 693.37  | 2077.07 | 2077.08 | -0.01 | 0 | 41 | 0.0011   | 1 | TVDVLINGAGILDDHQIER          | 9.44E+06 | control-Rep I      |
| gij7287844  | FBgn0000055 | 693.37  | 2077.09 | 2077.08 | 0.01  | 0 | 32 | 0.007    | 1 | TVDVLINGAGILDDHQIER          | 1.12E+07 | parkin null-Rep I  |
| gij7287844  | FBgn0000055 | 693.37  | 2077.09 | 2077.08 | 0.01  | 0 | 45 | 0.0004   | 1 | TVDVLINGAGILDDHQIER          | 1.12E+07 | parkin null-Rep II |
| gij7287844  | FBgn0000055 | 693.37  | 2077.09 | 2077.08 | 0.01  | 0 | 34 | 0.0043   | 1 | TVDVLINGAGILDDHQIER          | 1.19E+07 | control-Rep II     |
| gij7287844  | FBgn0000055 | 1072.57 | 2143.13 | 2143.11 | 0.02  | 0 | 67 | 2.60E-06 | 1 | VTVTFYPYDVTVPPIAETTK         | 2.23E+07 | parkin null-Rep II |
| gij7287844  | FBgn0000055 | 1072.57 | 2143.12 | 2143.11 | 0.02  | 0 | 61 | 1.10E-05 | 1 | VTVTFYPYDVTVPPIAETTK         | 2.39E+07 | control-Rep II     |
| gij7287844  | FBgn0000055 | 1072.57 | 2143.13 | 2143.11 | 0.02  | 0 | 63 | 6.00E-06 | 1 | VTVTFYPYDVTVPPIAETTK         | 2.51E+07 | parkin null-Rep I  |
| gij7287844  | FBgn0000055 | 1072.57 | 2143.12 | 2143.11 | 0.01  | 0 | 76 | 3.50E-07 | 1 | VTVTFYPYDVTVPPIAETTK         | 2.95E+07 | control-Rep I      |
| gij217318   | FBgn0000064 | 638.82  | 1275.63 | 1275.63 | -0.01 | 0 | 57 | 3.30E-05 | 1 | ADDGTPFAEILK                 | 1.62E+07 | control-Rep II     |
| gij217318   | FBgn0000064 | 638.83  | 1275.64 | 1275.63 | 0     | 0 | 42 | 0.001    | 1 | ADDGTPFAEILK                 | 1.67E+07 | parkin null-Rep II |

|           |             |         |         |         |       |   |     |          |   |                         |          |                    |
|-----------|-------------|---------|---------|---------|-------|---|-----|----------|---|-------------------------|----------|--------------------|
| gij217318 | FBgn0000064 | 638.82  | 1275.63 | 1275.63 | -0.01 | 0 | 42  | 0.00091  | 1 | ADDGTPFAEILK            | 1.72E+07 | parkin null-Rep I  |
| gij217318 | FBgn0000064 | 638.83  | 1275.64 | 1275.63 | 0     | 0 | 45  | 0.00044  | 1 | ADDGTPFAEILK            | 1.92E+07 | control-Rep I      |
| gij217318 | FBgn0000064 | 1195.11 | 2388.2  | 2388.18 | 0.02  | 0 | 91  | 9.60E-09 | 1 | GVVPLFGSEDEVTTQGLDDLAAR | 2.87E+07 | control-Rep II     |
| gij217318 | FBgn0000064 | 1195.1  | 2388.18 | 2388.18 | 0     | 0 | 72  | 7.50E-07 | 1 | GVVPLFGSEDEVTTQGLDDLAAR | 3.43E+07 | control-Rep I      |
| gij217318 | FBgn0000064 | 1195.11 | 2388.2  | 2388.18 | 0.02  | 0 | 79  | 1.60E-07 | 1 | GVVPLFGSEDEVTTQGLDDLAAR | 3.44E+07 | parkin null-Rep II |
| gij217318 | FBgn0000064 | 1195.11 | 2388.21 | 2388.18 | 0.03  | 0 | 77  | 2.50E-07 | 1 | GVVPLFGSEDEVTTQGLDDLAAR | 4.09E+07 | parkin null-Rep I  |
| gij217318 | FBgn0000064 | 1064.56 | 2127.11 | 2127.08 | 0.02  | 0 | 65  | 3.70E-06 | 1 | IVPIVEPEVLPDGDHDLDR     | 9.54E+07 | control-Rep II     |
| gij217318 | FBgn0000064 | 710.04  | 2127.09 | 2127.08 | 0     | 0 | 31  | 0.0097   | 1 | IVPIVEPEVLPDGDHDLDR     | 1.08E+08 | control-Rep I      |
| gij217318 | FBgn0000064 | 710.04  | 2127.09 | 2127.08 | 0.01  | 0 | 29  | 0.017    | 1 | IVPIVEPEVLPDGDHDLDR     | 1.10E+08 | parkin null-Rep II |
| gij217318 | FBgn0000064 | 710.04  | 2127.09 | 2127.08 | 0.01  | 0 | 25  | 0.038    | 1 | IVPIVEPEVLPDGDHDLDR     | 1.12E+08 | parkin null-Rep I  |
| gij217318 | FBgn0000064 | 751.85  | 1501.68 | 1501.7  | -0.02 | 0 | 62  | 4.30E-06 | 1 | LQDIGVENTEDNR           | 8.30E+05 | parkin null-Rep II |
| gij217318 | FBgn0000064 | 751.86  | 1501.71 | 1501.7  | 0     | 0 | 53  | 4.50E-05 | 1 | LQDIGVENTEDNR           | 1.16E+06 | parkin null-Rep I  |
| gij217318 | FBgn0000064 | 751.85  | 1501.69 | 1501.7  | -0.01 | 0 | 58  | 1.10E-05 | 1 | LQDIGVENTEDNR           | 1.48E+06 | control-Rep II     |
| gij217318 | FBgn0000064 | 813.45  | 1624.88 | 1624.88 | 0     | 0 | 77  | 3.20E-07 | 1 | NTPEEIALATVQALR         | 3.34E+07 | parkin null-Rep I  |
| gij217318 | FBgn0000064 | 813.45  | 1624.89 | 1624.88 | 0.01  | 0 | 78  | 2.20E-07 | 1 | NTPEEIALATVQALR         | 3.72E+07 | control-Rep II     |
| gij217318 | FBgn0000064 | 813.45  | 1624.89 | 1624.88 | 0.01  | 0 | 71  | 1.20E-06 | 1 | NTPEEIALATVQALR         | 3.91E+07 | control-Rep I      |
| gij217318 | FBgn0000064 | 813.45  | 1624.88 | 1624.88 | 0     | 0 | 77  | 3.20E-07 | 1 | NTPEEIALATVQALR         | 4.48E+07 | parkin null-Rep II |
| gij217318 | FBgn0000064 | 945.49  | 1888.97 | 1888.96 | 0.01  | 0 | 69  | 1.40E-06 | 1 | NTPSYQSILENANVLR        | 3.86E+07 | control-Rep II     |
| gij217318 | FBgn0000064 | 945.49  | 1888.97 | 1888.96 | 0.01  | 0 | 71  | 1.00E-06 | 1 | NTPSYQSILENANVLR        | 4.21E+07 | parkin null-Rep II |
| gij217318 | FBgn0000064 | 945.49  | 1888.96 | 1888.96 | 0     | 0 | 70  | 1.20E-06 | 1 | NTPSYQSILENANVLR        | 4.55E+07 | control-Rep I      |
| gij217318 | FBgn0000064 | 945.5   | 1888.98 | 1888.96 | 0.01  | 0 | 80  | 1.30E-07 | 1 | NTPSYQSILENANVLR        | 5.41E+07 | parkin null-Rep I  |
| gij217318 | FBgn0000064 | 597.34  | 1192.67 | 1192.67 | 0     | 0 | 59  | 1.30E-05 | 1 | VTETVLAADVYK            | 1.84E+07 | control-Rep II     |
| gij217318 | FBgn0000064 | 597.34  | 1192.66 | 1192.67 | -0.01 | 0 | 58  | 1.70E-05 | 1 | VTETVLAADVYK            | 2.05E+07 | parkin null-Rep II |
| gij217318 | FBgn0000064 | 597.34  | 1192.66 | 1192.67 | -0.01 | 0 | 49  | 0.00016  | 1 | VTETVLAADVYK            | 2.14E+07 | parkin null-Rep I  |
| gij217318 | FBgn0000064 | 597.34  | 1192.67 | 1192.67 | 0     | 0 | 41  | 0.0017   | 1 | VTETVLAADVYK            | 2.61E+07 | control-Rep I      |
| gij217318 | FBgn0000064 | 949.96  | 1897.91 | 1897.9  | 0.02  | 0 | 109 | 1.70E-10 | 1 | YVAGSAGAGSGSLFVANHAY    | 3.85E+06 | control-Rep II     |
| gij217318 | FBgn0000064 | 949.96  | 1897.91 | 1897.9  | 0.01  | 0 | 89  | 1.80E-08 | 1 | YVAGSAGAGSGSLFVANHAY    | 4.80E+06 | control-Rep I      |
| gij217318 | FBgn0000064 | 949.96  | 1897.9  | 1897.9  | 0.01  | 0 | 85  | 3.90E-08 | 1 | YVAGSAGAGSGSLFVANHAY    | 7.21E+06 | parkin null-Rep II |
| gij113987 | FBgn0000100 | 810.41  | 1618.81 | 1618.8  | 0.01  | 0 | 98  | 2.30E-09 | 1 | FAAAASASAAPAAGGATEK     | 4.75E+06 | parkin null-Rep II |
| gij113987 | FBgn0000100 | 810.41  | 1618.8  | 1618.8  | 0     | 0 | 95  | 5.30E-09 | 1 | FAAAASASAAPAAGGATEK     | 6.26E+06 | parkin null-Rep I  |
| gij113987 | FBgn0000100 | 810.4   | 1618.79 | 1618.8  | 0     | 0 | 77  | 3.30E-07 | 1 | FAAAASASAAPAAGGATEK     | 7.79E+06 | control-Rep I      |
| gij113987 | FBgn0000100 | 810.41  | 1618.8  | 1618.8  | 0.01  | 0 | 87  | 3.40E-08 | 1 | FAAAASASAAPAAGGATEK     | 8.53E+06 | control-Rep II     |
| gij113987 | FBgn0000100 | 608.02  | 1821.02 | 1821.02 | 0     | 0 | 39  | 0.00074  | 1 | GTIEIINDVPILKPGDK       | 8.82E+06 | parkin null-Rep II |
| gij113987 | FBgn0000100 | 608.02  | 1821.03 | 1821.02 | 0.01  | 0 | 53  | 2.30E-05 | 1 | GTIEIINDVPILKPGDK       | 9.03E+06 | parkin null-Rep I  |
| gij113987 | FBgn0000100 | 911.52  | 1821.03 | 1821.02 | 0     | 0 | 46  | 0.0002   | 1 | GTIEIINDVPILKPGDK       | 9.63E+06 | control-Rep II     |
| gij113987 | FBgn0000100 | 608.02  | 1821.03 | 1821.02 | 0.01  | 0 | 35  | 0.0014   | 1 | GTIEIINDVPILKPGDK       | 1.14E+07 | control-Rep I      |
| gij113987 | FBgn0000100 | 611.82  | 1221.63 | 1221.63 | 0.01  | 0 | 49  | 0.00017  | 1 | VVELFDEFPPK             | 1.28E+07 | parkin null-Rep I  |
| gij113987 | FBgn0000100 | 611.82  | 1221.63 | 1221.63 | 0     | 0 | 51  | 0.00011  | 1 | VVELFDEFPPK             | 1.36E+07 | control-Rep II     |
| gij113987 | FBgn0000100 | 611.82  | 1221.63 | 1221.63 | 0     | 0 | 55  | 5.50E-05 | 1 | VVELFDEFPPK             | 1.45E+07 | control-Rep I      |

|             |             |         |         |         |       |   |    |          |   |                             |          |                    |
|-------------|-------------|---------|---------|---------|-------|---|----|----------|---|-----------------------------|----------|--------------------|
| gij113987   | FBgn0000100 | 611.82  | 1221.63 | 1221.63 | 0     | 0 | 53 | 6.80E-05 | 1 | VVELFDEFK                   | 1.63E+07 | parkin null-Rep II |
| gij24661348 | FBgn0000116 | 567.97  | 1700.89 | 1700.89 | 0     | 0 | 27 | 0.034    | 1 | AVQQQLIDHFLFK               | 1.31E+08 | control-Rep II     |
| gij24661348 | FBgn0000116 | 567.97  | 1700.89 | 1700.89 | 0     | 0 | 36 | 0.0043   | 1 | AVQQQLIDHFLFK               | 1.40E+08 | parkin null-Rep II |
| gij24661348 | FBgn0000116 | 567.97  | 1700.89 | 1700.89 | 0     | 0 | 32 | 0.012    | 1 | AVQQQLIDHFLFK               | 1.46E+08 | parkin null-Rep I  |
| gij24661348 | FBgn0000116 | 567.97  | 1700.89 | 1700.89 | 0     | 0 | 34 | 0.0068   | 1 | AVQQQLIDHFLFK               | 1.57E+08 | control-Rep I      |
| gij24661348 | FBgn0000116 | 656.33  | 1310.64 | 1310.64 | 0     | 0 | 41 | 0.00088  | 1 | EMYDGITELIK                 | 7.93E+07 | parkin null-Rep II |
| gij24661348 | FBgn0000116 | 656.33  | 1310.65 | 1310.64 | 0.01  | 0 | 40 | 0.001    | 1 | EMYDGITELIK                 | 8.64E+07 | parkin null-Rep I  |
| gij24661348 | FBgn0000116 | 656.34  | 1310.66 | 1310.64 | 0.01  | 0 | 39 | 0.0015   | 1 | EMYDGITELIK                 | 9.06E+07 | control-Rep II     |
| gij24661348 | FBgn0000116 | 656.33  | 1310.65 | 1310.64 | 0     | 0 | 34 | 0.0044   | 1 | EMYDGITELIK                 | 9.53E+07 | control-Rep I      |
| gij24661348 | FBgn0000116 | 525.76  | 1049.51 | 1049.51 | 0     | 0 | 29 | 0.015    | 1 | FLQAANACR                   | 1.31E+05 | parkin null-Rep II |
| gij24661348 | FBgn0000116 | 525.76  | 1049.51 | 1049.51 | 0     | 0 | 27 | 0.023    | 1 | FLQAANACR                   | 3.92E+05 | control-Rep I      |
| gij24661348 | FBgn0000116 | 569.26  | 1704.76 | 1704.76 | 0     | 0 | 67 | 9.50E-07 | 1 | GEHTAEAGGVYDISNK            | 1.67E+07 | parkin null-Rep II |
| gij24661348 | FBgn0000116 | 569.26  | 1704.76 | 1704.76 | 0     | 0 | 41 | 0.00033  | 1 | GEHTAEAGGVYDISNK            | 1.99E+07 | parkin null-Rep I  |
| gij24661348 | FBgn0000116 | 569.26  | 1704.76 | 1704.76 | 0     | 0 | 42 | 0.00028  | 1 | GEHTAEAGGVYDISNK            | 2.45E+07 | control-Rep II     |
| gij24661348 | FBgn0000116 | 569.26  | 1704.76 | 1704.76 | 0     | 0 | 42 | 0.00031  | 1 | GEHTAEAGGVYDISNK            | 2.47E+07 | control-Rep I      |
| gij24661348 | FBgn0000116 | 621.29  | 1860.86 | 1860.86 | 0     | 1 | 32 | 0.0046   | 1 | GEHTAEAGGVYDISNKR           | 8.90E+05 | parkin null-Rep I  |
| gij24661348 | FBgn0000116 | 621.29  | 1860.85 | 1860.86 | -0.01 | 1 | 34 | 0.0048   | 1 | GEHTAEAGGVYDISNKR           | 9.54E+05 | control-Rep I      |
| gij24661348 | FBgn0000116 | 1412.68 | 2823.35 | 2823.31 | 0.04  | 0 | 46 | 0.00028  | 1 | HPASNFGDVSTFGNVDPNTNEYVISTR | 3.31E+05 | parkin null-Rep I  |
| gij24661348 | FBgn0000116 | 942.12  | 2823.33 | 2823.31 | 0.02  | 0 | 22 | 0.035    | 1 | HPASNFGDVSTFGNVDPNTNEYVISTR | 3.15E+06 | control-Rep II     |
| gij24661348 | FBgn0000116 | 942.12  | 2823.34 | 2823.31 | 0.03  | 0 | 25 | 0.019    | 1 | HPASNFGDVSTFGNVDPNTNEYVISTR | 4.12E+06 | control-Rep I      |
| gij24661348 | FBgn0000116 | 825.93  | 1649.84 | 1649.84 | 0     | 0 | 66 | 4.00E-06 | 1 | IISMQQGGDLGQIYK             | 8.11E+07 | parkin null-Rep I  |
| gij24661348 | FBgn0000116 | 825.93  | 1649.85 | 1649.84 | 0     | 0 | 64 | 5.40E-06 | 1 | IISMQQGGDLGQIYK             | 9.27E+07 | control-Rep I      |
| gij24661348 | FBgn0000116 | 825.93  | 1649.85 | 1649.84 | 0     | 0 | 67 | 3.20E-06 | 1 | IISMQQGGDLGQIYK             | 9.28E+07 | control-Rep II     |
| gij24661348 | FBgn0000116 | 825.93  | 1649.85 | 1649.84 | 0     | 0 | 66 | 3.40E-06 | 1 | IISMQQGGDLGQIYK             | 9.58E+07 | parkin null-Rep II |
| gij24661348 | FBgn0000116 | 905.99  | 1809.97 | 1809.94 | 0.02  | 0 | 61 | 1.00E-05 | 1 | LGFLTFCPTNLGTTIR            | 1.28E+08 | control-Rep II     |
| gij24661348 | FBgn0000116 | 905.99  | 1809.96 | 1809.94 | 0.02  | 0 | 65 | 4.70E-06 | 1 | LGFLTFCPTNLGTTIR            | 1.31E+08 | parkin null-Rep II |
| gij24661348 | FBgn0000116 | 905.98  | 1809.95 | 1809.94 | 0.01  | 0 | 60 | 1.10E-05 | 1 | LGFLTFCPTNLGTTIR            | 1.49E+08 | parkin null-Rep I  |
| gij24661348 | FBgn0000116 | 905.98  | 1809.95 | 1809.94 | 0     | 0 | 73 | 6.50E-07 | 1 | LGFLTFCPTNLGTTIR            | 1.53E+08 | control-Rep I      |
| gij24661348 | FBgn0000116 | 562.79  | 1123.57 | 1123.56 | 0.01  | 0 | 30 | 0.022    | 1 | MGLTEFEAVK                  | 1.09E+07 | parkin null-Rep II |
| gij24661348 | FBgn0000116 | 562.79  | 1123.56 | 1123.56 | 0.01  | 0 | 30 | 0.022    | 1 | MGLTEFEAVK                  | 1.34E+07 | control-Rep II     |
| gij24661348 | FBgn0000116 | 562.79  | 1123.56 | 1123.56 | 0     | 0 | 27 | 0.046    | 1 | MGLTEFEAVK                  | 1.55E+07 | parkin null-Rep I  |
| gij24661348 | FBgn0000116 | 806.41  | 2416.21 | 2416.19 | 0.02  | 1 | 48 | 0.0004   | 1 | MGLTEFEAVKEMYDGITELIK       | 4.01E+06 | control-Rep II     |
| gij24661348 | FBgn0000116 | 806.41  | 2416.22 | 2416.19 | 0.03  | 1 | 58 | 1.60E-05 | 1 | MGLTEFEAVKEMYDGITELIK       | 4.18E+06 | parkin null-Rep I  |
| gij24661348 | FBgn0000116 | 1017.46 | 2032.9  | 2032.9  | 0     | 0 | 61 | 2.70E-06 | 1 | SMQGYFPNCLTEAQYK            | 5.58E+07 | control-Rep II     |
| gij24661348 | FBgn0000116 | 1017.46 | 2032.91 | 2032.9  | 0.01  | 0 | 66 | 1.10E-06 | 1 | SMQGYFPNCLTEAQYK            | 5.74E+07 | parkin null-Rep II |
| gij24661348 | FBgn0000116 | 1017.45 | 2032.89 | 2032.9  | -0.01 | 0 | 61 | 2.90E-06 | 1 | SMQGYFPNCLTEAQYK            | 5.77E+07 | control-Rep I      |
| gij24661348 | FBgn0000116 | 1017.45 | 2032.89 | 2032.9  | -0.01 | 0 | 68 | 5.20E-07 | 1 | SMQGYFPNCLTEAQYK            | 5.87E+07 | parkin null-Rep I  |
| gij24661348 | FBgn0000116 | 859.9   | 1717.79 | 1717.79 | 0     | 0 | 61 | 4.60E-06 | 1 | TFLVWCNEEDHLR               | 6.13E+07 | control-Rep II     |
| gij24661348 | FBgn0000116 | 573.6   | 1717.79 | 1717.79 | 0     | 0 | 31 | 0.005    | 1 | TFLVWCNEEDHLR               | 6.47E+07 | parkin null-Rep I  |



|             |             |         |         |         |       |   |    |          |   |                          |          |                    |
|-------------|-------------|---------|---------|---------|-------|---|----|----------|---|--------------------------|----------|--------------------|
| gij24661348 | FBgn0000116 | 573.61  | 1717.8  | 1717.79 | 0.01  | 0 | 22 | 0.042    | 1 | TFLVWCNEEDHLR            | 6.65E+07 | parkin null-Rep II |
| gij24661348 | FBgn0000116 | 573.61  | 1717.79 | 1717.79 | 0     | 0 | 27 | 0.013    | 1 | TFLVWCNEEDHLR            | 7.09E+07 | control-Rep I      |
| gij24661348 | FBgn0000116 | 660.36  | 1318.7  | 1318.7  | 0.01  | 0 | 70 | 1.50E-06 | 1 | VSSTLSGLEGELK            | 3.29E+07 | parkin null-Rep I  |
| gij24661348 | FBgn0000116 | 660.36  | 1318.7  | 1318.7  | 0.01  | 0 | 81 | 1.30E-07 | 1 | VSSTLSGLEGELK            | 3.43E+07 | control-Rep II     |
| gij24661348 | FBgn0000116 | 660.36  | 1318.7  | 1318.7  | 0.01  | 0 | 73 | 7.50E-07 | 1 | VSSTLSGLEGELK            | 3.51E+07 | control-Rep I      |
| gij24661348 | FBgn0000116 | 660.36  | 1318.71 | 1318.7  | 0.01  | 0 | 81 | 1.20E-07 | 1 | VSSTLSGLEGELK            | 4.72E+07 | parkin null-Rep II |
| gij114211   | FBgn0000121 | 946.12  | 2835.34 | 2835.33 | 0.01  | 0 | 33 | 0.0035   | 1 | DFIDHIDYCDPVDGVIVVEPDYLK | 1.94E+06 | parkin null-Rep I  |
| gij114211   | FBgn0000121 | 946.12  | 2835.35 | 2835.33 | 0.02  | 0 | 33 | 0.0039   | 1 | DFIDHIDYCDPVDGVIVVEPDYLK | 3.03E+06 | control-Rep II     |
| gij114211   | FBgn0000121 | 1027.44 | 2052.87 | 2052.86 | 0.01  | 0 | 43 | 0.00014  | 1 | GYQDDDDNIVFEDFAK         | 5.92E+05 | parkin null-Rep I  |
| gij114211   | FBgn0000121 | 1027.45 | 2052.89 | 2052.86 | 0.03  | 0 | 59 | 4.80E-06 | 1 | GYQDDDDNIVFEDFAK         | 1.45E+06 | parkin null-Rep II |
| gij114211   | FBgn0000121 | 933.95  | 1865.88 | 1865.87 | 0.01  | 0 | 82 | 5.10E-08 | 1 | LNCGTLGGEMQTDVPEFK       | 1.23E+07 | parkin null-Rep I  |
| gij114211   | FBgn0000121 | 933.95  | 1865.88 | 1865.87 | 0.02  | 0 | 73 | 3.70E-07 | 1 | LNCGTLGGEMQTDVPEFK       | 1.40E+07 | control-Rep II     |
| gij114211   | FBgn0000121 | 933.94  | 1865.86 | 1865.87 | 0     | 0 | 69 | 8.30E-07 | 1 | LNCGTLGGEMQTDVPEFK       | 1.45E+07 | control-Rep I      |
| gij114211   | FBgn0000121 | 933.95  | 1865.89 | 1865.87 | 0.02  | 0 | 77 | 1.70E-07 | 1 | LNCGTLGGEMQTDVPEFK       | 1.86E+07 | parkin null-Rep II |
| gij114211   | FBgn0000121 | 610.32  | 1218.62 | 1218.62 | 0     | 0 | 65 | 5.80E-06 | 1 | TAATVQVSNNNSK            | 4.44E+06 | parkin null-Rep I  |
| gij114211   | FBgn0000121 | 610.32  | 1218.63 | 1218.62 | 0.01  | 0 | 67 | 3.90E-06 | 1 | TAATVQVSNNNSK            | 4.80E+06 | parkin null-Rep II |
| gij114211   | FBgn0000121 | 610.32  | 1218.62 | 1218.62 | 0     | 0 | 67 | 3.90E-06 | 1 | TAATVQVSNNNSK            | 5.77E+06 | control-Rep II     |
| gij114211   | FBgn0000121 | 610.32  | 1218.62 | 1218.62 | 0     | 0 | 74 | 7.10E-07 | 1 | TAATVQVSNNNSK            | 9.04E+06 | control-Rep I      |
| gij114211   | FBgn0000121 | 471.22  | 1410.64 | 1410.64 | 0     | 1 | 21 | 0.043    | 1 | YGREEDVVMGVK             | 4.14E+05 | parkin null-Rep II |
| gij114211   | FBgn0000121 | 471.22  | 1410.64 | 1410.64 | -0.01 | 1 | 29 | 0.014    | 1 | YGREEDVVMGVK             | 6.09E+05 | parkin null-Rep I  |
| gij114211   | FBgn0000121 | 471.22  | 1410.64 | 1410.64 | -0.01 | 1 | 29 | 0.013    | 1 | YGREEDVVMGVK             | 6.53E+05 | control-Rep II     |
| gij114211   | FBgn0000121 | 471.22  | 1410.64 | 1410.64 | -0.01 | 1 | 21 | 0.072    | 1 | YGREEDVVMGVK             | 8.95E+05 | control-Rep I      |
| gij127980   | FBgn0000150 | 526.25  | 1050.49 | 1050.49 | -0.01 | 0 | 33 | 0.0086   | 1 | GDFCIQVGR                | 7.01E+06 | parkin null-Rep II |
| gij127980   | FBgn0000150 | 526.25  | 1050.49 | 1050.49 | -0.01 | 0 | 47 | 0.00035  | 1 | GDFCIQVGR                | 8.15E+06 | parkin null-Rep I  |
| gij127980   | FBgn0000150 | 526.25  | 1050.49 | 1050.49 | -0.01 | 0 | 44 | 0.00063  | 1 | GDFCIQVGR                | 9.72E+06 | control-Rep II     |
| gij127980   | FBgn0000150 | 526.25  | 1050.49 | 1050.49 | -0.01 | 0 | 42 | 0.0011   | 1 | GDFCIQVGR                | 1.12E+07 | control-Rep I      |
| gij127980   | FBgn0000150 | 490.58  | 1468.71 | 1468.72 | 0     | 0 | 34 | 0.0045   | 1 | NIHGSDAVESAEK            | 8.17E+05 | parkin null-Rep II |
| gij127980   | FBgn0000150 | 735.36  | 1468.71 | 1468.72 | -0.01 | 0 | 47 | 0.00036  | 1 | NIHGSDAVESAEK            | 1.16E+06 | control-Rep II     |
| gij127980   | FBgn0000150 | 490.58  | 1468.72 | 1468.72 | 0     | 0 | 33 | 0.007    | 1 | NIHGSDAVESAEK            | 1.18E+06 | parkin null-Rep I  |
| gij127980   | FBgn0000150 | 490.58  | 1468.73 | 1468.72 | 0.01  | 0 | 26 | 0.033    | 1 | NIHGSDAVESAEK            | 1.34E+06 | control-Rep I      |
| gij127980   | FBgn0000150 | 871.44  | 1740.87 | 1740.88 | -0.01 | 0 | 98 | 2.00E-09 | 1 | QMLGATNPADSLPGTIR        | 3.37E+07 | parkin null-Rep I  |
| gij127980   | FBgn0000150 | 871.44  | 1740.87 | 1740.88 | -0.01 | 0 | 86 | 3.60E-08 | 1 | QMLGATNPADSLPGTIR        | 4.14E+07 | parkin null-Rep II |
| gij127980   | FBgn0000150 | 871.46  | 1740.9  | 1740.88 | 0.01  | 0 | 78 | 2.00E-07 | 1 | QMLGATNPADSLPGTIR        | 4.31E+07 | control-Rep II     |
| gij127980   | FBgn0000150 | 871.45  | 1740.89 | 1740.88 | 0     | 0 | 80 | 1.50E-07 | 1 | QMLGATNPADSLPGTIR        | 5.31E+07 | control-Rep I      |
| gij7688     | FBgn0000253 | 615.64  | 1843.88 | 1843.88 | 0     | 1 | 32 | 0.0069   | 1 | EAFSLFDKDGDTITTK         | 1.55E+07 | control-Rep I      |
| gij7688     | FBgn0000253 | 615.64  | 1843.89 | 1843.88 | 0     | 1 | 38 | 0.0019   | 1 | EAFSLFDKDGDTITTK         | 1.60E+07 | control-Rep II     |
| gij7688     | FBgn0000253 | 615.64  | 1843.89 | 1843.88 | 0     | 1 | 28 | 0.02     | 1 | EAFSLFDKDGDTITTK         | 1.75E+07 | parkin null-Rep II |
| gij7688     | FBgn0000253 | 675.31  | 1348.61 | 1348.62 | -0.01 | 0 | 41 | 0.00087  | 1 | LTDEEVDEMIR              | 1.02E+07 | control-Rep II     |
| gij7688     | FBgn0000253 | 675.32  | 1348.63 | 1348.62 | 0.01  | 0 | 36 | 0.0037   | 1 | LTDEEVDEMIR              | 1.14E+07 | parkin null-Rep I  |

|             |             |         |         |         |       |   |    |          |   |                           |          |                    |
|-------------|-------------|---------|---------|---------|-------|---|----|----------|---|---------------------------|----------|--------------------|
| gij7688     | FBgn000253  | 675.32  | 1348.63 | 1348.62 | 0.01  | 0 | 39 | 0.002    | 1 | LTDEEVDEMIR               | 1.28E+07 | control-Rep I      |
| gij7688     | FBgn000253  | 675.32  | 1348.63 | 1348.62 | 0.01  | 0 | 27 | 0.032    | 1 | LTDEEVDEMIR               | 1.59E+07 | parkin null-Rep II |
| gij7688     | FBgn000253  | 869.93  | 1737.85 | 1737.87 | -0.02 | 1 | 64 | 4.40E-06 | 1 | VFDKDGNGFISAAELR          | 9.42E+06 | control-Rep II     |
| gij7688     | FBgn000253  | 580.3   | 1737.88 | 1737.87 | 0.01  | 1 | 38 | 0.002    | 1 | VFDKDGNGFISAAELR          | 1.42E+07 | parkin null-Rep II |
| gij17981717 | FBgn0000261 | 721.33  | 1440.65 | 1440.65 | 0     | 0 | 78 | 6.10E-08 | 1 | FSTVGGESGSADTAR           | 1.62E+06 | parkin null-Rep II |
| gij17981717 | FBgn0000261 | 721.33  | 1440.65 | 1440.65 | 0     | 0 | 74 | 1.30E-07 | 1 | FSTVGGESGSADTAR           | 1.69E+06 | parkin null-Rep I  |
| gij17981717 | FBgn0000261 | 721.33  | 1440.65 | 1440.65 | 0     | 0 | 80 | 3.50E-08 | 1 | FSTVGGESGSADTAR           | 2.14E+06 | control-Rep I      |
| gij17981717 | FBgn0000261 | 721.33  | 1440.65 | 1440.65 | 0     | 0 | 77 | 6.70E-08 | 1 | FSTVGGESGSADTAR           | 2.27E+06 | control-Rep II     |
| gij17981717 | FBgn0000261 | 749.37  | 2245.09 | 2245.08 | 0.01  | 0 | 42 | 0.00071  | 1 | GPILLQDVNFLDEMESHFDR      | 1.95E+07 | control-Rep II     |
| gij17981717 | FBgn0000261 | 749.37  | 2245.09 | 2245.08 | 0.01  | 0 | 42 | 0.00083  | 1 | GPILLQDVNFLDEMESHFDR      | 2.15E+07 | parkin null-Rep II |
| gij17981717 | FBgn0000261 | 749.37  | 2245.09 | 2245.08 | 0     | 0 | 50 | 0.00012  | 1 | GPILLQDVNFLDEMESHFDR      | 2.34E+07 | control-Rep I      |
| gij17981717 | FBgn0000261 | 749.37  | 2245.09 | 2245.08 | 0.01  | 0 | 52 | 8.10E-05 | 1 | GPILLQDVNFLDEMESHFDR      | 2.68E+07 | parkin null-Rep I  |
| gij17981717 | FBgn0000261 | 888.46  | 1774.91 | 1774.91 | 0     | 0 | 27 | 0.031    | 1 | LGPNYLQIPVNCPYK           | 1.04E+07 | control-Rep II     |
| gij17981717 | FBgn0000261 | 888.47  | 1774.92 | 1774.91 | 0.01  | 0 | 32 | 0.011    | 1 | LGPNYLQIPVNCPYK           | 1.22E+07 | control-Rep I      |
| gij17981717 | FBgn0000261 | 709.05  | 2124.13 | 2124.11 | 0.02  | 0 | 40 | 0.001    | 1 | LVQNIAGHLSNASQFLQER       | 1.72E+07 | control-Rep I      |
| gij17981717 | FBgn0000261 | 709.05  | 2124.12 | 2124.11 | 0.01  | 0 | 38 | 0.0017   | 1 | LVQNIAGHLSNASQFLQER       | 1.73E+07 | parkin null-Rep II |
| gij17981717 | FBgn0000261 | 709.05  | 2124.12 | 2124.11 | 0.01  | 0 | 35 | 0.0036   | 1 | LVQNIAGHLSNASQFLQER       | 1.87E+07 | parkin null-Rep I  |
| gij17981717 | FBgn0000261 | 947.81  | 2840.4  | 2840.4  | 0     | 0 | 58 | 1.30E-05 | 1 | NYFAEVEQIAFSPAHLVPGVEPSDK | 3.14E+06 | control-Rep II     |
| gij17981717 | FBgn0000261 | 947.81  | 2840.39 | 2840.4  | -0.01 | 0 | 51 | 6.60E-05 | 1 | NYFAEVEQIAFSPAHLVPGVEPSDK | 3.30E+06 | control-Rep I      |
| gij17981717 | FBgn0000261 | 947.8   | 2840.39 | 2840.4  | -0.01 | 0 | 66 | 2.20E-06 | 1 | NYFAEVEQIAFSPAHLVPGVEPSDK | 4.22E+06 | parkin null-Rep II |
| gij17864142 | FBgn0000313 | 679.39  | 1356.77 | 1356.76 | 0.01  | 0 | 36 | 0.0026   | 1 | GLEDSLQTLILR              | 8.70E+06 | parkin null-Rep II |
| gij84914    | FBgn0000313 | 679.39  | 1356.77 | 1356.76 | 0     | 0 | 33 | 0.0077   | 1 | GLEDSLQTLILR              | 1.10E+07 | control-Rep I      |
| gij17864142 | FBgn0000313 | 679.39  | 1356.77 | 1356.76 | 0     | 0 | 35 | 0.0053   | 1 | GLEDSLQTLILR              | 1.24E+07 | parkin null-Rep I  |
| gij17864142 | FBgn0000313 | 801.92  | 1601.82 | 1601.8  | 0.01  | 0 | 72 | 1.20E-06 | 1 | INNLADESFNLPK             | 1.09E+07 | parkin null-Rep I  |
| gij17864142 | FBgn0000313 | 801.91  | 1601.81 | 1601.8  | 0     | 0 | 63 | 7.50E-06 | 1 | INNLADESFNLPK             | 1.15E+07 | parkin null-Rep II |
| gij17864142 | FBgn0000313 | 801.91  | 1601.81 | 1601.8  | 0     | 0 | 40 | 0.0016   | 1 | INNLADESFNLPK             | 1.31E+07 | control-Rep II     |
| gij17864142 | FBgn0000313 | 695.68  | 2084.03 | 2084.02 | 0.01  | 0 | 37 | 0.0025   | 1 | ISGNHLTEIPDDAFTGLER       | 1.39E+07 | parkin null-Rep II |
| gij17864142 | FBgn0000313 | 695.68  | 2084.03 | 2084.02 | 0.01  | 0 | 24 | 0.044    | 1 | ISGNHLTEIPDDAFTGLER       | 1.89E+07 | control-Rep II     |
| gij17864142 | FBgn0000313 | 695.68  | 2084.02 | 2084.02 | 0.01  | 0 | 35 | 0.0034   | 1 | ISGNHLTEIPDDAFTGLER       | 2.53E+07 | parkin null-Rep I  |
| gij17864142 | FBgn0000313 | 833.46  | 2497.37 | 2497.36 | 0.01  | 1 | 36 | 0.0017   | 1 | KIPNPTGAVPYLPNSVFLTDLK    | 9.17E+06 | control-Rep II     |
| gij17864142 | FBgn0000313 | 833.46  | 2497.36 | 2497.36 | 0     | 1 | 37 | 0.0015   | 1 | KIPNPTGAVPYLPNSVFLTDLK    | 1.04E+07 | parkin null-Rep I  |
| gij17864142 | FBgn0000313 | 569.31  | 1136.61 | 1136.6  | 0.01  | 0 | 36 | 0.0034   | 1 | LFNFDVLR                  | 7.55E+06 | parkin null-Rep II |
| gij17864142 | FBgn0000313 | 569.3   | 1136.59 | 1136.6  | 0     | 0 | 29 | 0.016    | 1 | LFNFDVLR                  | 7.56E+06 | parkin null-Rep I  |
| gij17864142 | FBgn0000313 | 569.31  | 1136.61 | 1136.6  | 0.01  | 0 | 40 | 0.0035   | 1 | LFNFDVLR                  | 8.56E+06 | control-Rep II     |
| gij84914    | FBgn0000313 | 569.31  | 1136.61 | 1136.6  | 0.01  | 0 | 38 | 0.0058   | 1 | LFNFDVLR                  | 1.04E+07 | control-Rep I      |
| gij17864142 | FBgn0000313 | 674     | 2018.98 | 2018.97 | 0.01  | 0 | 35 | 0.004    | 1 | LHYFEYGCLDSLPHLR          | 4.28E+06 | parkin null-Rep II |
| gij17864142 | FBgn0000313 | 673.99  | 2018.95 | 2018.97 | -0.02 | 0 | 39 | 0.0012   | 1 | LHYFEYGCLDSLPHLR          | 5.30E+06 | control-Rep II     |
| gij84914    | FBgn0000313 | 674     | 2018.98 | 2018.97 | 0.01  | 0 | 25 | 0.042    | 1 | LHYFEYGCLDSLPHLR          | 7.94E+06 | control-Rep I      |
| gij17864142 | FBgn0000313 | 1099.63 | 2197.24 | 2197.22 | 0.02  | 0 | 72 | 2.60E-07 | 1 | LLLDNLSIEIPYDALGPLK       | 2.17E+07 | parkin null-Rep II |

|             |             |         |         |         |       |   |    |          |   |                                  |          |                    |
|-------------|-------------|---------|---------|---------|-------|---|----|----------|---|----------------------------------|----------|--------------------|
| gij84914    | FBgn0000313 | 1099.63 | 2197.24 | 2197.22 | 0.02  | 0 | 74 | 1.70E-07 | 1 | LLTNDNILSEIPYDALGPLK             | 2.86E+07 | control-Rep I      |
| gij17864142 | FBgn0000313 | 1099.62 | 2197.23 | 2197.22 | 0     | 0 | 82 | 3.40E-08 | 1 | LLTNDNILSEIPYDALGPLK             | 3.04E+07 | control-Rep II     |
| gij17864142 | FBgn0000313 | 1099.63 | 2197.25 | 2197.22 | 0.02  | 0 | 75 | 1.30E-07 | 1 | LLTNDNILSEIPYDALGPLK             | 3.07E+07 | parkin null-Rep I  |
| gij17864142 | FBgn0000313 | 869.46  | 2605.36 | 2605.34 | 0.02  | 0 | 63 | 9.40E-06 | 1 | MLDLSNNDLTVPLMTQALPHLR           | 1.70E+07 | parkin null-Rep II |
| gij17864142 | FBgn0000313 | 869.46  | 2605.35 | 2605.34 | 0.01  | 0 | 63 | 1.00E-05 | 1 | MLDLSNNDLTVPLMTQALPHLR           | 1.89E+07 | parkin null-Rep I  |
| gij17864142 | FBgn0000313 | 869.46  | 2605.35 | 2605.34 | 0.01  | 0 | 55 | 6.60E-05 | 1 | MLDLSNNDLTVPLMTQALPHLR           | 1.99E+07 | control-Rep II     |
| gij84914    | FBgn0000313 | 869.46  | 2605.35 | 2605.34 | 0.01  | 0 | 54 | 8.90E-05 | 1 | MLDLSNNDLTVPLMTQALPHLR           | 2.14E+07 | control-Rep I      |
| gij17864142 | FBgn0000313 | 619.82  | 1237.63 | 1237.64 | -0.01 | 0 | 31 | 0.0094   | 1 | SFMGLENSLIK                      | 1.08E+07 | parkin null-Rep I  |
| gij17864142 | FBgn0000313 | 619.83  | 1237.65 | 1237.64 | 0.01  | 0 | 44 | 0.0005   | 1 | SFMGLENSLIK                      | 1.23E+07 | parkin null-Rep II |
| gij17864142 | FBgn0000313 | 619.83  | 1237.64 | 1237.64 | 0     | 0 | 36 | 0.0035   | 1 | SFMGLENSLIK                      | 1.43E+07 | control-Rep II     |
| gij84914    | FBgn0000313 | 619.83  | 1237.64 | 1237.64 | 0     | 0 | 36 | 0.0035   | 1 | SFMGLENSLIK                      | 1.50E+07 | control-Rep I      |
| gij17864142 | FBgn0000313 | 1047.59 | 2093.16 | 2093.14 | 0.02  | 0 | 34 | 0.0036   | 1 | SLWELILPQNDLVEIPSK               | 9.69E+06 | parkin null-Rep II |
| gij17864142 | FBgn0000313 | 1047.59 | 2093.16 | 2093.14 | 0.02  | 0 | 43 | 0.00056  | 1 | SLWELILPQNDLVEIPSK               | 1.30E+07 | parkin null-Rep I  |
| gij84914    | FBgn0000313 | 1047.59 | 2093.16 | 2093.14 | 0.02  | 0 | 73 | 5.20E-07 | 1 | SLWELILPQNDLVEIPSK               | 1.42E+07 | control-Rep I      |
| gij17864142 | FBgn0000313 | 1047.59 | 2093.16 | 2093.14 | 0.02  | 0 | 58 | 1.50E-05 | 1 | SLWELILPQNDLVEIPSK               | 1.48E+07 | control-Rep II     |
| gij24652838 | FBgn0000556 | 1182.91 | 3545.7  | 3545.69 | 0.01  | 0 | 55 | 2.50E-05 | 1 | IGYNPAAVAFVPISGWHGDNMLEPSTNMPWFK | 2.94E+07 | parkin null-Rep I  |
| gij24652838 | FBgn0000556 | 1182.91 | 3545.72 | 3545.69 | 0.03  | 0 | 62 | 5.00E-06 | 1 | IGYNPAAVAFVPISGWHGDNMLEPSTNMPWFK | 3.09E+07 | control-Rep I      |
| gij24652838 | FBgn0000556 | 1182.92 | 3545.74 | 3545.69 | 0.05  | 0 | 61 | 7.40E-06 | 1 | IGYNPAAVAFVPISGWHGDNMLEPSTNMPWFK | 3.29E+07 | parkin null-Rep II |
| gij24652838 | FBgn0000556 | 1182.92 | 3545.73 | 3545.69 | 0.04  | 0 | 34 | 0.0037   | 1 | IGYNPAAVAFVPISGWHGDNMLEPSTNMPWFK | 3.56E+07 | control-Rep II     |
| gij24652838 | FBgn0000556 | 457.79  | 913.57  | 913.56  | 0.01  | 0 | 38 | 0.0017   | 1 | QTVAVGVIK                        | 1.03E+06 | parkin null-Rep II |
| gij24652838 | FBgn0000556 | 457.79  | 913.57  | 913.56  | 0.01  | 0 | 30 | 0.012    | 1 | QTVAVGVIK                        | 3.02E+06 | control-Rep II     |
| gij24652838 | FBgn0000556 | 1004.53 | 3010.58 | 3010.56 | 0.02  | 0 | 40 | 0.0009   | 1 | SGDAAIVNLVPSKPLCVEAFQEFPLGR      | 4.08E+07 | control-Rep II     |
| gij24652838 | FBgn0000556 | 1004.53 | 3010.57 | 3010.56 | 0.01  | 0 | 57 | 2.00E-05 | 1 | SGDAAIVNLVPSKPLCVEAFQEFPLGR      | 4.28E+07 | control-Rep I      |
| gij24652838 | FBgn0000556 | 1004.53 | 3010.57 | 3010.56 | 0.02  | 0 | 45 | 0.00027  | 1 | SGDAAIVNLVPSKPLCVEAFQEFPLGR      | 4.39E+07 | parkin null-Rep I  |
| gij24652838 | FBgn0000556 | 1004.54 | 3010.59 | 3010.56 | 0.03  | 0 | 50 | 8.70E-05 | 1 | SGDAAIVNLVPSKPLCVEAFQEFPLGR      | 4.48E+07 | parkin null-Rep II |
| gij24652838 | FBgn0000556 | 560.8   | 1119.59 | 1119.59 | -0.01 | 0 | 32 | 0.0097   | 1 | STTTGHLIYK                       | 1.12E+06 | control-Rep II     |
| gij24652838 | FBgn0000556 | 560.8   | 1119.59 | 1119.59 | 0     | 0 | 26 | 0.039    | 1 | STTTGHLIYK                       | 1.18E+06 | control-Rep I      |
| gij24652838 | FBgn0000556 | 560.8   | 1119.59 | 1119.59 | -0.01 | 0 | 28 | 0.029    | 1 | STTTGHLIYK                       | 1.97E+06 | parkin null-Rep I  |
| gij24652838 | FBgn0000556 | 640.7   | 1919.09 | 1919.07 | 0.02  | 0 | 47 | 8.80E-05 | 1 | TLIDALDAILPPARPTDK               | 1.12E+08 | parkin null-Rep II |
| gij24652838 | FBgn0000556 | 640.7   | 1919.09 | 1919.07 | 0.01  | 0 | 47 | 9.40E-05 | 1 | TLIDALDAILPPARPTDK               | 1.22E+08 | control-Rep II     |
| gij24652838 | FBgn0000556 | 640.7   | 1919.08 | 1919.07 | 0.01  | 0 | 55 | 1.50E-05 | 1 | TLIDALDAILPPARPTDK               | 1.22E+08 | parkin null-Rep I  |
| gij24652838 | FBgn0000556 | 640.7   | 1919.08 | 1919.07 | 0.01  | 0 | 48 | 8.70E-05 | 1 | TLIDALDAILPPARPTDK               | 1.37E+08 | control-Rep I      |
| gij24652838 | FBgn0000556 | 823.81  | 2468.4  | 2468.39 | 0.01  | 0 | 42 | 0.00021  | 1 | VETGVLPKPGTVVVVFAPANITTEVK       | 1.04E+08 | parkin null-Rep I  |
| gij24652838 | FBgn0000556 | 823.81  | 2468.4  | 2468.39 | 0.01  | 0 | 41 | 0.00033  | 1 | VETGVLPKPGTVVVVFAPANITTEVK       | 1.06E+08 | parkin null-Rep II |
| gij24652838 | FBgn0000556 | 823.81  | 2468.4  | 2468.39 | 0.01  | 0 | 33 | 0.0018   | 1 | VETGVLPKPGTVVVVFAPANITTEVK       | 1.07E+08 | control-Rep II     |
| gij24652838 | FBgn0000556 | 823.81  | 2468.4  | 2468.39 | 0.01  | 0 | 36 | 0.00091  | 1 | VETGVLPKPGTVVVVFAPANITTEVK       | 1.13E+08 | control-Rep I      |
| gij45553816 | FBgn0000557 | 972.48  | 2914.41 | 2914.4  | 0.02  | 0 | 63 | 5.50E-06 | 1 | IGYNPASVAFVPISGWHGDNMLEPSEK      | 1.35E+07 | parkin null-Rep II |
| gij84946    | FBgn0000557 | 972.48  | 2914.42 | 2914.4  | 0.02  | 0 | 59 | 1.20E-05 | 1 | IGYNPASVAFVPISGWHGDNMLEPSEK      | 1.52E+07 | control-Rep I      |
| gij84946    | FBgn0000557 | 852.15  | 2553.44 | 2553.42 | 0.01  | 0 | 44 | 0.00016  | 1 | VETGLLKPGMVVNFAPVNLVTEVK         | 4.98E+07 | control-Rep II     |

|             |             |         |         |         |       |   |     |          |   |                           |          |                    |
|-------------|-------------|---------|---------|---------|-------|---|-----|----------|---|---------------------------|----------|--------------------|
| gij84946    | FBgn0000557 | 852.15  | 2553.43 | 2553.42 | 0     | 0 | 50  | 3.50E-05 | 1 | VETGLLKPGMVVNFAPVNLVTEVK  | 5.29E+07 | control-Rep I      |
| gij45553816 | FBgn0000557 | 852.15  | 2553.43 | 2553.42 | 0.01  | 0 | 36  | 0.0008   | 1 | VETGLLKPGMVVNFAPVNLVTEVK  | 5.57E+07 | parkin null-Rep I  |
| gij45553816 | FBgn0000557 | 852.15  | 2553.44 | 2553.42 | 0.02  | 0 | 33  | 0.0015   | 1 | VETGLLKPGMVVNFAPVNLVTEVK  | 5.78E+07 | parkin null-Rep II |
| gij17380352 | FBgn0000559 | 1027.49 | 2052.97 | 2052.97 | 0     | 0 | 50  | 0.00015  | 1 | ALPMPDGLPEDIDNGDVSAK      | 4.98E+06 | parkin null-Rep II |
| gij17380352 | FBgn0000559 | 1027.48 | 2052.95 | 2052.97 | -0.02 | 0 | 41  | 0.00038  | 1 | ALPMPDGLPEDIDNGDVSAK      | 7.42E+06 | parkin null-Rep I  |
| gij17380352 | FBgn0000559 | 1027.5  | 2052.99 | 2052.97 | 0.02  | 0 | 69  | 1.80E-06 | 1 | ALPMPDGLPEDIDNGDVSAK      | 7.89E+06 | control-Rep II     |
| gij17380352 | FBgn0000559 | 745.9   | 1489.79 | 1489.77 | 0.02  | 1 | 58  | 2.70E-05 | 1 | EGLPDLSEQYLDKL            | 1.00E+07 | parkin null-Rep II |
| gij17380352 | FBgn0000559 | 745.9   | 1489.78 | 1489.77 | 0.02  | 1 | 56  | 4.80E-05 | 1 | EGLPDLSEQYLDKL            | 1.29E+07 | control-Rep II     |
| gij17380352 | FBgn0000559 | 745.9   | 1489.78 | 1489.77 | 0.01  | 1 | 54  | 7.90E-05 | 1 | EGLPDLSEQYLDKL            | 1.35E+07 | parkin null-Rep I  |
| gij17380352 | FBgn0000559 | 745.89  | 1489.77 | 1489.77 | 0     | 1 | 56  | 5.30E-05 | 1 | EGLPDLSEQYLDKL            | 1.46E+07 | control-Rep I      |
| gij17380352 | FBgn0000559 | 821.86  | 1641.71 | 1641.69 | 0.02  | 0 | 76  | 5.80E-08 | 1 | ETVSEESDQMCLSK            | 3.67E+06 | parkin null-Rep II |
| gij17380352 | FBgn0000559 | 821.84  | 1641.67 | 1641.69 | -0.02 | 0 | 53  | 6.90E-06 | 1 | ETVSEESDQMCLSK            | 4.94E+06 | parkin null-Rep I  |
| gij17380352 | FBgn0000559 | 821.85  | 1641.69 | 1641.69 | 0.01  | 0 | 69  | 2.60E-07 | 1 | ETVSEESDQMCLSK            | 6.86E+06 | control-Rep I      |
| gij17380352 | FBgn0000559 | 821.85  | 1641.69 | 1641.69 | 0     | 0 | 70  | 1.60E-07 | 1 | ETVSEESDQMCLSK            | 6.91E+06 | control-Rep II     |
| gij17380352 | FBgn0000559 | 673.01  | 2016.02 | 2016.01 | 0     | 0 | 41  | 0.001    | 1 | GHVFEENQVVGTPMFVVK        | 3.39E+06 | control-Rep I      |
| gij17380352 | FBgn0000559 | 673.01  | 2016.01 | 2016.01 | -0.01 | 0 | 36  | 0.003    | 1 | GHVFEENQVVGTPMFVVK        | 4.20E+06 | parkin null-Rep II |
| gij17380352 | FBgn0000559 | 895.18  | 2682.51 | 2682.49 | 0.02  | 0 | 46  | 5.00E-05 | 1 | TWLPAGEALLQMIAIHLPSVVAQK  | 1.10E+07 | control-Rep II     |
| gij17380352 | FBgn0000559 | 895.18  | 2682.51 | 2682.49 | 0.02  | 0 | 40  | 0.00018  | 1 | TWLPAGEALLQMIAIHLPSVVAQK  | 1.10E+07 | parkin null-Rep II |
| gij17380352 | FBgn0000559 | 895.18  | 2682.52 | 2682.49 | 0.03  | 0 | 42  | 8.80E-05 | 1 | TWLPAGEALLQMIAIHLPSVVAQK  | 1.12E+07 | parkin null-Rep I  |
| gij17380352 | FBgn0000559 | 895.18  | 2682.51 | 2682.49 | 0.02  | 0 | 42  | 0.00011  | 1 | TWLPAGEALLQMIAIHLPSVVAQK  | 1.43E+07 | control-Rep I      |
| gij17380352 | FBgn0000559 | 1361.2  | 2720.39 | 2720.37 | 0.01  | 0 | 62  | 7.40E-06 | 1 | YVEAIEDVPSGNIQCLVGVQDQLVK | 2.59E+06 | control-Rep II     |
| gij17380352 | FBgn0000559 | 1361.19 | 2720.36 | 2720.37 | -0.01 | 0 | 74  | 5.10E-07 | 1 | YVEAIEDVPSGNIQCLVGVQDQLVK | 3.01E+06 | control-Rep I      |
| gij17137654 | FBgn0000579 | 588.98  | 1763.92 | 1763.92 | 0     | 0 | 25  | 0.042    | 1 | AAVPSGASTGVHEALELR        | 1.29E+08 | parkin null-Rep II |
| gij21392248 | FBgn0000579 | 588.98  | 1763.92 | 1763.92 | 0     | 0 | 26  | 0.037    | 1 | AAVPSGASTGVHEALELR        | 1.47E+08 | parkin null-Rep I  |
| gij119351   | FBgn0000579 | 588.98  | 1763.91 | 1763.92 | 0     | 0 | 24  | 0.055    | 1 | AAVPSGASTGVHEALELR        | 1.71E+08 | control-Rep I      |
| gij119351   | FBgn0000579 | 946.97  | 1891.93 | 1891.93 | -0.01 | 0 | 70  | 1.20E-06 | 1 | ANLDVVDQASIDNFMVK         | 3.38E+06 | control-Rep I      |
| gij21392248 | FBgn0000579 | 946.98  | 1891.95 | 1891.93 | 0.02  | 0 | 115 | 4.30E-11 | 1 | ANLDVVDQASIDNFMVK         | 5.36E+06 | parkin null-Rep I  |
| gij21392248 | FBgn0000579 | 629.36  | 1256.7  | 1256.7  | 0     | 0 | 58  | 3.10E-05 | 1 | EALNLISDAIAK              | 4.52E+07 | control-Rep II     |
| gij17137654 | FBgn0000579 | 629.36  | 1256.7  | 1256.7  | 0.01  | 0 | 56  | 5.00E-05 | 1 | EALNLISDAIAK              | 4.96E+07 | parkin null-Rep II |
| gij21392248 | FBgn0000579 | 629.36  | 1256.7  | 1256.7  | 0     | 0 | 64  | 8.60E-06 | 1 | EALNLISDAIAK              | 5.02E+07 | parkin null-Rep I  |
| gij119351   | FBgn0000579 | 629.36  | 1256.7  | 1256.7  | 0     | 0 | 55  | 6.60E-05 | 1 | EALNLISDAIAK              | 5.70E+07 | control-Rep I      |
| gij119351   | FBgn0000579 | 1104.54 | 2207.07 | 2207.05 | 0.02  | 0 | 80  | 1.80E-07 | 1 | FGLDATAVGDEGGFAPNIQSNK    | 4.61E+06 | control-Rep I      |
| gij21392248 | FBgn0000579 | 1104.54 | 2207.07 | 2207.05 | 0.02  | 0 | 102 | 1.10E-09 | 1 | FGLDATAVGDEGGFAPNIQSNK    | 4.92E+06 | parkin null-Rep I  |
| gij17137654 | FBgn0000579 | 1104.53 | 2207.05 | 2207.05 | 0     | 0 | 96  | 2.10E-09 | 1 | FGLDATAVGDEGGFAPNIQSNK    | 5.76E+06 | parkin null-Rep II |
| gij17137654 | FBgn0000579 | 522.78  | 1043.55 | 1043.55 | 0     | 0 | 44  | 0.00075  | 1 | IEEEIGAGVK                | 1.56E+07 | parkin null-Rep II |
| gij21392248 | FBgn0000579 | 522.78  | 1043.55 | 1043.55 | 0     | 0 | 36  | 0.0047   | 1 | IEEEIGAGVK                | 1.98E+07 | parkin null-Rep I  |
| gij21392248 | FBgn0000579 | 522.78  | 1043.55 | 1043.55 | 0     | 0 | 36  | 0.0047   | 1 | IEEEIGAGVK                | 2.21E+07 | control-Rep II     |
| gij119351   | FBgn0000579 | 522.78  | 1043.55 | 1043.55 | 0     | 0 | 47  | 0.00033  | 1 | IEEEIGAGVK                | 2.78E+07 | control-Rep I      |
| gij17137654 | FBgn0000579 | 619.85  | 1237.69 | 1237.67 | 0.01  | 0 | 43  | 0.00047  | 1 | LANLYQEFIK                | 8.43E+06 | parkin null-Rep II |

|             |             |         |         |         |       |   |    |          |   |                           |          |                    |
|-------------|-------------|---------|---------|---------|-------|---|----|----------|---|---------------------------|----------|--------------------|
| gij21392248 | FBgn0000579 | 619.84  | 1237.67 | 1237.67 | -0.01 | 0 | 37 | 0.0021   | 1 | LANLYQEFIK                | 1.43E+07 | control-Rep II     |
| gij17137654 | FBgn0000579 | 622.36  | 1864.05 | 1864.04 | 0.01  | 0 | 30 | 0.0063   | 1 | VNQIGTVTESIAAHLAK         | 3.72E+07 | parkin null-Rep II |
| gij21392248 | FBgn0000579 | 622.36  | 1864.05 | 1864.04 | 0.01  | 0 | 29 | 0.0078   | 1 | VNQIGTVTESIAAHLAK         | 3.93E+07 | control-Rep II     |
| gij119351   | FBgn0000579 | 622.36  | 1864.05 | 1864.04 | 0.01  | 0 | 27 | 0.012    | 1 | VNQIGTVTESIAAHLAK         | 4.49E+07 | control-Rep I      |
| gij21392248 | FBgn0000579 | 622.36  | 1864.05 | 1864.04 | 0.01  | 0 | 22 | 0.036    | 1 | VNQIGTVTESIAAHLAK         | 4.57E+07 | parkin null-Rep I  |
| gij24664085 | FBgn0000639 | 773.39  | 1544.77 | 1544.77 | 0     | 0 | 34 | 0.011    | 1 | AMNPVMSILMPWR             | 3.37E+06 | control-Rep II     |
| gij24664085 | FBgn0000639 | 773.38  | 1544.75 | 1544.77 | -0.02 | 0 | 36 | 0.0059   | 1 | AMNPVMSILMPWR             | 4.89E+06 | control-Rep I      |
| gij24664085 | FBgn0000639 | 773.39  | 1544.77 | 1544.77 | 0.01  | 0 | 46 | 0.00039  | 1 | AMNPVMSILMPWR             | 2.58E+07 | parkin null-Rep I  |
| gij24664085 | FBgn0000639 | 773.4   | 1544.78 | 1544.77 | 0.01  | 0 | 57 | 3.10E-05 | 1 | AMNPVMSILMPWR             | 2.73E+07 | parkin null-Rep II |
| gij24664085 | FBgn0000639 | 615.87  | 1229.73 | 1229.71 | 0.01  | 0 | 53 | 3.30E-05 | 1 | FILDIVQNIR                | 1.28E+07 | parkin null-Rep II |
| gij24664085 | FBgn0000639 | 615.87  | 1229.72 | 1229.71 | 0     | 0 | 53 | 4.80E-05 | 1 | FILDIVQNIR                | 1.31E+07 | parkin null-Rep I  |
| gij24664085 | FBgn0000639 | 1001.86 | 3002.56 | 3002.53 | 0.03  | 0 | 40 | 0.0007   | 1 | IEEHLDLSNLVEQQVQGIQVEIVGR | 1.12E+07 | parkin null-Rep I  |
| gij24664085 | FBgn0000639 | 1001.86 | 3002.56 | 3002.53 | 0.03  | 0 | 65 | 2.20E-06 | 1 | IEEHLDLSNLVEQQVQGIQVEIVGR | 1.13E+07 | parkin null-Rep II |
| gij24664085 | FBgn0000639 | 803.9   | 1605.79 | 1605.77 | 0.02  | 0 | 66 | 2.80E-06 | 1 | LMTDDEILEMLQR             | 1.02E+07 | control-Rep I      |
| gij24664085 | FBgn0000639 | 803.9   | 1605.78 | 1605.77 | 0.01  | 0 | 65 | 4.00E-06 | 1 | LMTDDEILEMLQR             | 3.62E+07 | parkin null-Rep I  |
| gij24664085 | FBgn0000639 | 803.9   | 1605.79 | 1605.77 | 0.01  | 0 | 72 | 7.40E-07 | 1 | LMTDDEILEMLQR             | 3.70E+07 | parkin null-Rep II |
| gij24664085 | FBgn0000639 | 888.47  | 2662.38 | 2662.37 | 0.01  | 0 | 23 | 0.047    | 1 | LNQESIAQQQLIEEQQLINNPR    | 1.85E+07 | parkin null-Rep I  |
| gij24664085 | FBgn0000639 | 888.47  | 2662.39 | 2662.37 | 0.02  | 0 | 25 | 0.031    | 1 | LNQESIAQQQLIEEQQLINNPR    | 1.97E+07 | parkin null-Rep II |
| gij24664085 | FBgn0000639 | 706.91  | 1411.81 | 1411.8  | 0.01  | 0 | 68 | 1.70E-06 | 1 | QVESLIADVLLGR             | 1.08E+07 | parkin null-Rep I  |
| gij24664085 | FBgn0000639 | 706.91  | 1411.8  | 1411.8  | 0     | 0 | 72 | 6.90E-07 | 1 | QVESLIADVLLGR             | 1.28E+07 | parkin null-Rep II |
| gij24664085 | FBgn0000639 | 1103.09 | 2204.17 | 2204.14 | 0.03  | 0 | 83 | 4.20E-08 | 1 | SIDIPWTTSDVTPLVEIYR       | 8.07E+06 | parkin null-Rep I  |
| gij24664085 | FBgn0000639 | 1103.08 | 2204.15 | 2204.14 | 0.01  | 0 | 81 | 8.20E-08 | 1 | SIDIPWTTSDVTPLVEIYR       | 8.70E+06 | parkin null-Rep II |
| gij13124689 | FBgn0000667 | 748.36  | 1494.71 | 1494.72 | -0.01 | 0 | 35 | 0.0061   | 1 | AFEEWLLAETMR              | 4.17E+06 | control-Rep II     |
| gij13124689 | FBgn0000667 | 748.37  | 1494.73 | 1494.72 | 0.01  | 0 | 34 | 0.0096   | 1 | AFEEWLLAETMR              | 4.91E+06 | parkin null-Rep I  |
| gij13124689 | FBgn0000667 | 748.37  | 1494.73 | 1494.72 | 0.01  | 0 | 43 | 0.0011   | 1 | AFEEWLLAETMR              | 5.58E+06 | parkin null-Rep II |
| gij13124689 | FBgn0000667 | 748.37  | 1494.73 | 1494.72 | 0.01  | 0 | 43 | 0.0012   | 1 | AFEEWLLAETMR              | 8.24E+06 | control-Rep I      |
| gij13124689 | FBgn0000667 | 725.85  | 1449.69 | 1449.67 | 0.01  | 0 | 49 | 0.00013  | 1 | AGTAIDNIEEDFR             | 5.20E+06 | parkin null-Rep II |
| gij13124689 | FBgn0000667 | 725.85  | 1449.68 | 1449.67 | 0     | 0 | 47 | 0.00015  | 1 | AGTAIDNIEEDFR             | 6.29E+06 | parkin null-Rep I  |
| gij13124689 | FBgn0000667 | 725.84  | 1449.67 | 1449.67 | 0     | 0 | 57 | 1.40E-05 | 1 | AGTAIDNIEEDFR             | 6.92E+06 | control-Rep II     |
| gij13124689 | FBgn0000667 | 725.84  | 1449.67 | 1449.67 | -0.01 | 0 | 66 | 1.70E-06 | 1 | AGTAIDNIEEDFR             | 7.74E+06 | control-Rep I      |
| gij13124689 | FBgn0000667 | 668.03  | 2001.07 | 2001.09 | -0.02 | 1 | 58 | 2.10E-05 | 1 | ATLGEADKEFNLIIVNLVR       | 9.75E+06 | parkin null-Rep II |
| gij13124689 | FBgn0000667 | 668.04  | 2001.1  | 2001.09 | 0.01  | 1 | 55 | 3.10E-05 | 1 | ATLGEADKEFNLIIVNLVR       | 1.11E+07 | control-Rep II     |
| gij13124689 | FBgn0000667 | 668.04  | 2001.1  | 2001.09 | 0.01  | 1 | 51 | 7.20E-05 | 1 | ATLGEADKEFNLIIVNLVR       | 1.17E+07 | control-Rep I      |
| gij13124689 | FBgn0000667 | 895.44  | 1788.87 | 1788.85 | 0.01  | 0 | 59 | 2.80E-05 | 1 | DNPLENLNTAFDVAEK          | 6.97E+06 | parkin null-Rep II |
| gij13124689 | FBgn0000667 | 895.43  | 1788.85 | 1788.85 | 0     | 0 | 70 | 8.80E-07 | 1 | DNPLENLNTAFDVAEK          | 7.74E+06 | parkin null-Rep I  |
| gij13124689 | FBgn0000667 | 895.44  | 1788.87 | 1788.85 | 0.01  | 0 | 73 | 5.00E-07 | 1 | DNPLENLNTAFDVAEK          | 8.60E+06 | control-Rep II     |
| gij13124689 | FBgn0000667 | 895.43  | 1788.85 | 1788.85 | -0.01 | 0 | 74 | 6.20E-07 | 1 | DNPLENLNTAFDVAEK          | 9.55E+06 | control-Rep I      |
| gij13124689 | FBgn0000667 | 907.4   | 1812.79 | 1812.8  | -0.02 | 0 | 54 | 1.30E-05 | 1 | ESTDTDTAEQVIDSFR          | 7.56E+06 | parkin null-Rep II |
| gij13124689 | FBgn0000667 | 907.41  | 1812.8  | 1812.8  | 0     | 0 | 65 | 9.30E-07 | 1 | ESTDTDTAEQVIDSFR          | 9.52E+06 | parkin null-Rep I  |

|             |             |        |         |         |       |   |    |          |   |                     |          |                    |
|-------------|-------------|--------|---------|---------|-------|---|----|----------|---|---------------------|----------|--------------------|
| gij13124689 | FBgn0000667 | 907.41 | 1812.81 | 1812.8  | 0     | 0 | 61 | 4.70E-06 | 1 | ESTDTDTAEQVIDSFR    | 1.00E+07 | control-Rep I      |
| gij13124689 | FBgn0000667 | 907.42 | 1812.83 | 1812.8  | 0.02  | 0 | 61 | 7.50E-06 | 1 | ESTDTDTAEQVIDSFR    | 1.02E+07 | control-Rep II     |
| gij13124689 | FBgn0000667 | 542.58 | 1624.72 | 1624.72 | 0     | 0 | 51 | 3.20E-05 | 1 | HEAFESDLAAHQDR      | 2.37E+05 | parkin null-Rep II |
| gij13124689 | FBgn0000667 | 542.58 | 1624.72 | 1624.72 | 0     | 0 | 33 | 0.0018   | 1 | HEAFESDLAAHQDR      | 2.61E+05 | parkin null-Rep I  |
| gij13124689 | FBgn0000667 | 542.58 | 1624.73 | 1624.72 | 0     | 0 | 40 | 0.00049  | 1 | HEAFESDLAAHQDR      | 4.11E+05 | control-Rep II     |
| gij13124689 | FBgn0000667 | 567.95 | 1700.83 | 1700.83 | 0     | 0 | 29 | 0.017    | 1 | IHQAVQESMIFENR      | 8.94E+06 | parkin null-Rep I  |
| gij13124689 | FBgn0000667 | 567.95 | 1700.83 | 1700.83 | 0     | 0 | 35 | 0.0037   | 1 | IHQAVQESMIFENR      | 9.91E+06 | parkin null-Rep II |
| gij13124689 | FBgn0000667 | 567.95 | 1700.83 | 1700.83 | 0     | 0 | 24 | 0.052    | 1 | IHQAVQESMIFENR      | 1.18E+07 | control-Rep II     |
| gij13124689 | FBgn0000667 | 567.95 | 1700.83 | 1700.83 | 0     | 0 | 31 | 0.011    | 1 | IHQAVQESMIFENR      | 1.50E+07 | control-Rep I      |
| gij13124689 | FBgn0000667 | 864    | 1725.99 | 1725.97 | 0.02  | 0 | 65 | 2.60E-06 | 1 | ILAADKPYILPDEL      | 1.02E+07 | control-Rep II     |
| gij13124689 | FBgn0000667 | 863.99 | 1725.97 | 1725.97 | 0.01  | 0 | 58 | 1.60E-05 | 1 | ILAADKPYILPDEL      | 1.21E+07 | parkin null-Rep II |
| gij13124689 | FBgn0000667 | 576.33 | 1725.97 | 1725.97 | 0     | 0 | 32 | 0.0055   | 1 | ILAADKPYILPDEL      | 1.30E+07 | parkin null-Rep I  |
| gij13124689 | FBgn0000667 | 863.99 | 1725.97 | 1725.97 | 0     | 0 | 77 | 1.80E-07 | 1 | ILAADKPYILPDEL      | 1.51E+07 | control-Rep I      |
| gij13124689 | FBgn0000667 | 608.35 | 1214.68 | 1214.67 | 0.01  | 0 | 68 | 2.90E-06 | 1 | LASDLLEWIR          | 1.64E+07 | parkin null-Rep II |
| gij13124689 | FBgn0000667 | 608.34 | 1214.67 | 1214.67 | 0     | 0 | 73 | 1.50E-06 | 1 | LASDLLEWIR          | 1.86E+07 | parkin null-Rep I  |
| gij13124689 | FBgn0000667 | 608.34 | 1214.67 | 1214.67 | 0.01  | 0 | 68 | 3.00E-06 | 1 | LASDLLEWIR          | 1.90E+07 | control-Rep II     |
| gij13124689 | FBgn0000667 | 608.34 | 1214.67 | 1214.67 | 0     | 0 | 69 | 3.40E-06 | 1 | LASDLLEWIR          | 2.44E+07 | control-Rep I      |
| gij13124689 | FBgn0000667 | 708.39 | 1414.76 | 1414.76 | 0     | 0 | 66 | 5.30E-06 | 1 | VGWEQLLTSINR        | 2.06E+07 | parkin null-Rep I  |
| gij13124689 | FBgn0000667 | 708.39 | 1414.76 | 1414.76 | 0     | 0 | 49 | 0.00023  | 1 | VGWEQLLTSINR        | 2.10E+07 | parkin null-Rep II |
| gij13124689 | FBgn0000667 | 708.39 | 1414.77 | 1414.76 | 0.01  | 0 | 66 | 4.80E-06 | 1 | VGWEQLLTSINR        | 2.30E+07 | control-Rep II     |
| gij13124689 | FBgn0000667 | 708.39 | 1414.76 | 1414.76 | 0.01  | 0 | 60 | 1.70E-05 | 1 | VGWEQLLTSINR        | 2.82E+07 | control-Rep I      |
| gij542577   | FBgn0001098 | 768.36 | 1534.71 | 1534.71 | 0     | 0 | 34 | 0.005    | 1 | DIVHSGLDYTMER       | 3.79E+06 | parkin null-Rep II |
| gij542577   | FBgn0001098 | 768.36 | 1534.7  | 1534.71 | 0     | 0 | 32 | 0.0041   | 1 | DIVHSGLDYTMER       | 6.36E+06 | control-Rep II     |
| gij542577   | FBgn0001098 | 768.36 | 1534.71 | 1534.71 | 0     | 0 | 35 | 0.0041   | 1 | DIVHSGLDYTMER       | 7.71E+06 | control-Rep I      |
| gij542577   | FBgn0001098 | 768.35 | 1534.69 | 1534.71 | -0.01 | 0 | 38 | 0.00097  | 1 | DIVHSGLDYTMER       | 7.78E+06 | parkin null-Rep I  |
| gij542577   | FBgn0001098 | 797.86 | 1593.71 | 1593.7  | 0     | 0 | 49 | 4.60E-05 | 1 | GCQIAEESLVDDMK      | 8.12E+06 | control-Rep II     |
| gij542577   | FBgn0001098 | 797.85 | 1593.69 | 1593.7  | -0.02 | 0 | 67 | 4.30E-07 | 1 | GCQIAEESLVDDMK      | 8.52E+06 | parkin null-Rep I  |
| gij542577   | FBgn0001098 | 797.86 | 1593.7  | 1593.7  | 0     | 0 | 64 | 1.40E-06 | 1 | GCQIAEESLVDDMK      | 9.78E+06 | control-Rep I      |
| gij542577   | FBgn0001098 | 797.85 | 1593.69 | 1593.7  | -0.01 | 0 | 69 | 3.90E-07 | 1 | GCQIAEESLVDDMK      | 1.08E+07 | parkin null-Rep II |
| gij4555444  | FBgn0001105 | 987.51 | 1973.01 | 1972.99 | 0.02  | 0 | 75 | 8.10E-07 | 1 | AACDTSLLQAATSLEPIGR | 4.72E+06 | control-Rep I      |
| gij4555444  | FBgn0001105 | 987.51 | 1973.01 | 1972.99 | 0.02  | 0 | 71 | 2.00E-06 | 1 | AACDTSLLQAATSLEPIGR | 5.87E+06 | parkin null-Rep I  |
| gij4555444  | FBgn0001105 | 987.5  | 1972.98 | 1972.99 | -0.01 | 0 | 77 | 2.60E-07 | 1 | AACDTSLLQAATSLEPIGR | 6.44E+06 | parkin null-Rep II |
| gij4555444  | FBgn0001105 | 607.28 | 1212.54 | 1212.54 | 0     | 0 | 44 | 0.00019  | 1 | TFVSGACDASAK        | 1.46E+06 | parkin null-Rep I  |
| gij4555444  | FBgn0001105 | 607.28 | 1212.55 | 1212.54 | 0     | 0 | 45 | 0.00016  | 1 | TFVSGACDASAK        | 1.46E+06 | parkin null-Rep II |
| gij4555444  | FBgn0001105 | 607.28 | 1212.54 | 1212.54 | -0.01 | 0 | 52 | 2.60E-05 | 1 | TFVSGACDASAK        | 2.01E+06 | control-Rep II     |
| gij4555444  | FBgn0001105 | 607.28 | 1212.54 | 1212.54 | 0     | 0 | 40 | 0.00051  | 1 | TFVSGACDASAK        | 2.33E+06 | control-Rep I      |
| gij17861668 | FBgn0001125 | 863.39 | 1724.77 | 1724.77 | 0     | 0 | 73 | 2.20E-07 | 1 | AGAFTVLCSDDEEAAAR   | 7.62E+06 | parkin null-Rep I  |
| gij17861668 | FBgn0001125 | 863.4  | 1724.79 | 1724.77 | 0.02  | 0 | 92 | 7.30E-09 | 1 | AGAFTVLCSDDEEAAAR   | 8.98E+06 | control-Rep I      |
| gij17861668 | FBgn0001125 | 685.87 | 1369.73 | 1369.72 | 0.01  | 0 | 48 | 0.00023  | 1 | IAAEILNNDLR         | 4.28E+06 | control-Rep II     |

|             |             |         |         |         |       |   |     |          |   |                               |          |                    |
|-------------|-------------|---------|---------|---------|-------|---|-----|----------|---|-------------------------------|----------|--------------------|
| gij17861668 | FBgn0001125 | 685.87  | 1369.73 | 1369.72 | 0.01  | 0 | 67  | 2.80E-06 | 1 | IAAEILNNEDLR                  | 4.31E+06 | parkin null-Rep II |
| gij17861668 | FBgn0001125 | 685.87  | 1369.73 | 1369.72 | 0.01  | 0 | 64  | 5.80E-06 | 1 | IAAEILNNEDLR                  | 5.98E+06 | parkin null-Rep I  |
| gij17861668 | FBgn0001125 | 685.87  | 1369.73 | 1369.72 | 0.01  | 0 | 56  | 3.80E-05 | 1 | IAAEILNNEDLR                  | 8.21E+06 | control-Rep I      |
| gij103185   | FBgn0001128 | 517.96  | 1550.86 | 1550.84 | 0.02  | 0 | 59  | 1.50E-05 | 1 | AEGGGIDLISHITR                | 7.63E+06 | parkin null-Rep II |
| gij103185   | FBgn0001128 | 517.96  | 1550.85 | 1550.84 | 0.01  | 0 | 43  | 0.00053  | 1 | AEGGGIDLISHITR                | 7.99E+06 | control-Rep II     |
| gij103185   | FBgn0001128 | 517.96  | 1550.86 | 1550.84 | 0.02  | 0 | 40  | 0.00095  | 1 | AEGGGIDLISHITR                | 9.26E+06 | parkin null-Rep I  |
| gij103185   | FBgn0001128 | 517.96  | 1550.86 | 1550.84 | 0.02  | 0 | 44  | 0.0004   | 1 | AEGGGIDLISHITR                | 1.01E+07 | control-Rep I      |
| gij103185   | FBgn0001128 | 539.3   | 1614.88 | 1614.88 | 0     | 1 | 42  | 0.002    | 1 | GLEDKFPLFTAIHK                | 6.46E+06 | parkin null-Rep I  |
| gij103185   | FBgn0001128 | 539.29  | 1614.86 | 1614.88 | -0.02 | 1 | 48  | 0.00031  | 1 | GLEDKFPLFTAIHK                | 9.12E+06 | control-Rep I      |
| gij103185   | FBgn0001128 | 539.3   | 1614.88 | 1614.88 | 0     | 1 | 37  | 0.006    | 1 | GLEDKFPLFTAIHK                | 9.75E+06 | parkin null-Rep II |
| gij103185   | FBgn0001128 | 539.3   | 1614.87 | 1614.88 | 0     | 1 | 30  | 0.019    | 1 | GLEDKFPLFTAIHK                | 1.04E+07 | control-Rep II     |
| gij103185   | FBgn0001128 | 793.92  | 1585.83 | 1585.81 | 0.02  | 0 | 55  | 6.00E-05 | 1 | IVGANAAALPEFEER               | 1.02E+07 | parkin null-Rep I  |
| gij103185   | FBgn0001128 | 793.91  | 1585.81 | 1585.81 | 0     | 0 | 33  | 0.01     | 1 | IVGANAAALPEFEER               | 1.09E+07 | parkin null-Rep II |
| gij103185   | FBgn0001128 | 793.91  | 1585.81 | 1585.81 | 0     | 0 | 57  | 3.20E-05 | 1 | IVGANAAALPEFEER               | 1.22E+07 | control-Rep II     |
| gij103185   | FBgn0001128 | 793.91  | 1585.81 | 1585.81 | 0     | 0 | 46  | 0.00049  | 1 | IVGANAAALPEFEER               | 1.28E+07 | control-Rep I      |
| gij103185   | FBgn0001128 | 816.47  | 1630.93 | 1630.93 | 0.01  | 0 | 46  | 0.00019  | 1 | LPPNVVAVPDLVEAAK              | 1.74E+07 | parkin null-Rep II |
| gij103185   | FBgn0001128 | 816.48  | 1630.94 | 1630.93 | 0.01  | 0 | 39  | 0.00079  | 1 | LPPNVVAVPDLVEAAK              | 1.84E+07 | parkin null-Rep I  |
| gij103185   | FBgn0001128 | 816.48  | 1630.94 | 1630.93 | 0.01  | 0 | 41  | 0.0005   | 1 | LPPNVVAVPDLVEAAK              | 2.23E+07 | control-Rep I      |
| gij103185   | FBgn0001128 | 816.48  | 1630.95 | 1630.93 | 0.02  | 0 | 32  | 0.0033   | 1 | LPPNVVAVPDLVEAAK              | 2.36E+07 | control-Rep II     |
| gij103185   | FBgn0001128 | 710.87  | 1419.73 | 1419.72 | 0.01  | 0 | 45  | 0.0005   | 1 | NIVACGAGFVDGLK                | 4.79E+06 | control-Rep II     |
| gij103185   | FBgn0001128 | 710.87  | 1419.73 | 1419.72 | 0.01  | 0 | 52  | 0.0001   | 1 | NIVACGAGFVDGLK                | 5.87E+06 | parkin null-Rep II |
| gij16768060 | FBgn0001145 | 568.94  | 1703.79 | 1703.79 | 0.01  | 0 | 36  | 0.0022   | 1 | HETSSINDFSAGVANR              | 6.36E+06 | parkin null-Rep II |
| gij16768060 | FBgn0001145 | 568.94  | 1703.79 | 1703.79 | 0.01  | 0 | 29  | 0.0093   | 1 | HETSSINDFSAGVANR              | 9.37E+06 | control-Rep II     |
| gij24641292 | FBgn0001145 | 568.94  | 1703.8  | 1703.79 | 0.01  | 0 | 37  | 0.0017   | 1 | HETSSINDFSAGVANR              | 1.01E+07 | control-Rep I      |
| gij16768060 | FBgn0001145 | 655     | 1961.97 | 1961.96 | 0.01  | 0 | 64  | 6.00E-06 | 1 | RPSSNCDPYSVVEAILR             | 1.87E+07 | parkin null-Rep II |
| gij16768060 | FBgn0001145 | 655     | 1961.98 | 1961.96 | 0.02  | 0 | 46  | 0.00036  | 1 | RPSSNCDPYSVVEAILR             | 2.08E+07 | control-Rep II     |
| gij24641292 | FBgn0001145 | 655     | 1961.97 | 1961.96 | 0.01  | 0 | 65  | 5.30E-06 | 1 | RPSSNCDPYSVVEAILR             | 2.11E+07 | parkin null-Rep I  |
| gij24641292 | FBgn0001145 | 655     | 1961.97 | 1961.96 | 0     | 0 | 53  | 7.50E-05 | 1 | RPSSNCDPYSVVEAILR             | 2.42E+07 | control-Rep I      |
| gij38564182 | FBgn0001196 | 425.77  | 849.53  | 849.52  | 0.01  | 0 | 34  | 0.00074  | 1 | HLQLAIR                       | 4.56E+05 | parkin null-Rep II |
| gij38564182 | FBgn0001196 | 425.77  | 849.53  | 849.52  | 0.01  | 0 | 28  | 0.0032   | 1 | HLQLAIR                       | 1.21E+06 | parkin null-Rep I  |
| gij38564182 | FBgn0001196 | 1151.2  | 2300.39 | 2300.38 | 0.01  | 0 | 101 | 2.50E-11 | 1 | LLSGVTIAQGGVLPNIQAVLLPK       | 2.45E+07 | parkin null-Rep II |
| gij38564182 | FBgn0001196 | 1151.21 | 2300.4  | 2300.38 | 0.02  | 0 | 109 | 3.90E-12 | 1 | LLSGVTIAQGGVLPNIQAVLLPK       | 2.83E+07 | control-Rep II     |
| gij38564182 | FBgn0001196 | 1151.21 | 2300.4  | 2300.38 | 0.02  | 0 | 117 | 6.00E-13 | 1 | LLSGVTIAQGGVLPNIQAVLLPK       | 3.72E+07 | control-Rep I      |
| gij38564182 | FBgn0001196 | 1151.21 | 2300.41 | 2300.38 | 0.03  | 0 | 103 | 1.20E-11 | 1 | LLSGVTIAQGGVLPNIQAVLLPK       | 4.15E+07 | parkin null-Rep I  |
| gij38564182 | FBgn0001196 | 963.85  | 2888.53 | 2888.51 | 0.02  | 0 | 96  | 2.00E-09 | 1 | VGAGAPVYLAAVMEYLAAEVLELAGNAAR | 1.08E+07 | parkin null-Rep I  |
| gij38564182 | FBgn0001196 | 963.85  | 2888.52 | 2888.51 | 0.01  | 0 | 84  | 3.00E-08 | 1 | VGAGAPVYLAAVMEYLAAEVLELAGNAAR | 1.90E+07 | control-Rep II     |
| gij38564182 | FBgn0001196 | 963.85  | 2888.52 | 2888.51 | 0.01  | 0 | 85  | 2.90E-08 | 1 | VGAGAPVYLAAVMEYLAAEVLELAGNAAR | 2.13E+07 | control-Rep I      |
| gij38564182 | FBgn0001196 | 963.85  | 2888.53 | 2888.51 | 0.02  | 0 | 93  | 4.10E-09 | 1 | VGAGAPVYLAAVMEYLAAEVLELAGNAAR | 2.52E+07 | parkin null-Rep II |
| gij1483314  | FBgn0001208 | 894.95  | 1787.89 | 1787.87 | 0.02  | 0 | 42  | 0.00078  | 1 | EDNIPQLEDVSNFLR               | 5.34E+06 | parkin null-Rep I  |

|             |             |         |         |         |       |   |    |          |   |                                       |          |                    |
|-------------|-------------|---------|---------|---------|-------|---|----|----------|---|---------------------------------------|----------|--------------------|
| gil1483314  | FBgn0001208 | 894.94  | 1787.87 | 1787.87 | 0     | 0 | 40 | 0.0011   | 1 | EDNIPQLEDVSNFLR                       | 6.15E+06 | control-Rep I      |
| gil1483314  | FBgn0001208 | 894.95  | 1787.89 | 1787.87 | 0.02  | 0 | 49 | 0.00015  | 1 | EDNIPQLEDVSNFLR                       | 6.44E+06 | parkin null-Rep II |
| gil1483314  | FBgn0001208 | 660.66  | 1978.96 | 1978.94 | 0.02  | 0 | 33 | 0.006    | 1 | EYNHVFPLLVDNCGFR                      | 3.33E+06 | control-Rep II     |
| gil1483314  | FBgn0001208 | 660.65  | 1978.93 | 1978.94 | -0.01 | 0 | 34 | 0.0045   | 1 | EYNHVFPLLVDNCGFR                      | 3.58E+06 | parkin null-Rep I  |
| gil1483314  | FBgn0001208 | 660.66  | 1978.96 | 1978.94 | 0.02  | 0 | 44 | 0.00046  | 1 | EYNHVFPLLVDNCGFR                      | 4.28E+06 | parkin null-Rep II |
| gil1483314  | FBgn0001208 | 948.1   | 2841.29 | 2841.29 | 0     | 0 | 42 | 0.00027  | 1 | FANQILSYGSELDADHPGFDPPEYR             | 1.76E+07 | control-Rep I      |
| gil1483314  | FBgn0001208 | 948.11  | 2841.31 | 2841.29 | 0.02  | 0 | 54 | 1.90E-05 | 1 | FANQILSYGSELDADHPGFDPPEYR             | 1.81E+07 | parkin null-Rep I  |
| gil1483314  | FBgn0001208 | 948.11  | 2841.31 | 2841.29 | 0.03  | 0 | 41 | 0.00041  | 1 | FANQILSYGSELDADHPGFDPPEYR             | 2.02E+07 | control-Rep II     |
| gil1483314  | FBgn0001208 | 1395.71 | 4184.11 | 4184.07 | 0.03  | 0 | 84 | 1.90E-08 | 1 | YNAYTQSVLEVLDKPKQISNLMNINSEFQILQNAVAK | 3.67E+06 | parkin null-Rep I  |
| gil1483314  | FBgn0001208 | 1395.71 | 4184.11 | 4184.07 | 0.03  | 0 | 87 | 3.20E-08 | 1 | YNAYTQSVLEVLDKPKQISNLMNINSEFQILQNAVAK | 5.44E+06 | control-Rep II     |
| gil266310   | FBgn0001218 | 648.38  | 1294.75 | 1294.75 | 0     | 0 | 49 | 5.70E-05 | 1 | DLEAIVQPVIK                           | 9.32E+06 | parkin null-Rep I  |
| gil266310   | FBgn0001218 | 648.38  | 1294.75 | 1294.75 | 0     | 0 | 44 | 0.00039  | 1 | DLEAIVQPVIK                           | 9.45E+06 | control-Rep I      |
| gil266310   | FBgn0001218 | 648.38  | 1294.75 | 1294.75 | 0     | 0 | 44 | 0.00035  | 1 | DLEAIVQPVIK                           | 9.70E+06 | parkin null-Rep II |
| gil266310   | FBgn0001218 | 648.39  | 1294.77 | 1294.75 | 0.02  | 0 | 46 | 0.00015  | 1 | DLEAIVQPVIK                           | 9.81E+06 | control-Rep II     |
| gil266310   | FBgn0001218 | 691.38  | 1380.75 | 1380.74 | 0.01  | 0 | 31 | 0.018    | 1 | DVHEIVLVGGSTR                         | 3.68E+06 | parkin null-Rep II |
| gil266310   | FBgn0001218 | 691.37  | 1380.73 | 1380.74 | -0.01 | 0 | 35 | 0.0087   | 1 | DVHEIVLVGGSTR                         | 6.61E+06 | control-Rep I      |
| gil266310   | FBgn0001218 | 763.88  | 1525.75 | 1525.74 | 0     | 0 | 49 | 0.00018  | 1 | ITPSYVAFTADGER                        | 4.40E+06 | control-Rep I      |
| gil266310   | FBgn0001218 | 763.88  | 1525.75 | 1525.74 | 0     | 0 | 39 | 0.0016   | 1 | ITPSYVAFTADGER                        | 4.54E+06 | parkin null-Rep II |
| gil266310   | FBgn0001218 | 745.9   | 1489.79 | 1489.78 | 0     | 0 | 39 | 0.0024   | 1 | VFAPEEISAMVLGK                        | 6.94E+06 | parkin null-Rep II |
| gil266310   | FBgn0001218 | 745.9   | 1489.78 | 1489.78 | 0     | 0 | 36 | 0.0043   | 1 | VFAPEEISAMVLGK                        | 6.98E+06 | parkin null-Rep I  |
| gil266310   | FBgn0001218 | 745.9   | 1489.79 | 1489.78 | 0     | 0 | 27 | 0.034    | 1 | VFAPEEISAMVLGK                        | 7.31E+06 | control-Rep I      |
| gil103190   | FBgn0001219 | 740.89  | 1479.76 | 1479.75 | 0.01  | 1 | 34 | 0.0061   | 1 | ARFEELNADLFR                          | 9.13E+06 | parkin null-Rep II |
| gil103190   | FBgn0001219 | 494.26  | 1479.76 | 1479.75 | 0.01  | 1 | 40 | 0.0031   | 1 | ARFEELNADLFR                          | 9.65E+06 | control-Rep II     |
| gil103190   | FBgn0001219 | 740.88  | 1479.75 | 1479.75 | 0     | 1 | 33 | 0.0064   | 1 | ARFEELNADLFR                          | 1.28E+07 | parkin null-Rep I  |
| gil28571721 | FBgn0001219 | 740.88  | 1479.75 | 1479.75 | 0     | 1 | 29 | 0.017    | 1 | ARFEELNADLFR                          | 1.35E+07 | control-Rep I      |
| gil103190   | FBgn0001219 | 491.25  | 980.49  | 980.48  | 0     | 0 | 21 | 0.27     | 1 | ETAAYLGGK                             | 8.57E+05 | parkin null-Rep II |
| gil103190   | FBgn0001219 | 491.25  | 980.49  | 980.48  | 0     | 0 | 21 | 0.27     | 1 | ETAAYLGGK                             | 1.16E+06 | control-Rep II     |
| gil28571721 | FBgn0001219 | 491.25  | 980.49  | 980.48  | 0     | 0 | 28 | 0.049    | 1 | ETAAYLGGK                             | 1.58E+06 | control-Rep I      |
| gil103190   | FBgn0001219 | 627.31  | 1252.61 | 1252.61 | 0     | 0 | 32 | 0.015    | 1 | FEELNADLFR                            | 1.13E+07 | parkin null-Rep II |
| gil103190   | FBgn0001219 | 627.31  | 1252.61 | 1252.61 | 0.01  | 0 | 37 | 0.0021   | 1 | FEELNADLFR                            | 1.27E+07 | control-Rep II     |
| gil103190   | FBgn0001219 | 627.31  | 1252.61 | 1252.61 | 0     | 0 | 35 | 0.0037   | 1 | FEELNADLFR                            | 1.33E+07 | parkin null-Rep I  |
| gil28571721 | FBgn0001219 | 627.31  | 1252.61 | 1252.61 | 0     | 0 | 31 | 0.0091   | 1 | FEELNADLFR                            | 1.47E+07 | control-Rep I      |
| gil28571721 | FBgn0001219 | 677.81  | 1353.61 | 1353.62 | -0.02 | 1 | 42 | 0.00041  | 1 | KFDDAAVQSDMK                          | 7.93E+04 | control-Rep I      |
| gil103190   | FBgn0001219 | 677.82  | 1353.63 | 1353.62 | 0     | 1 | 46 | 0.00017  | 1 | KFDDAAVQSDMK                          | 8.01E+04 | parkin null-Rep I  |
| gil103190   | FBgn0001219 | 677.82  | 1353.63 | 1353.62 | 0     | 1 | 48 | 0.0001   | 1 | KFDDAAVQSDMK                          | 1.21E+05 | control-Rep II     |
| gil103190   | FBgn0001219 | 677.81  | 1353.61 | 1353.62 | -0.02 | 1 | 48 | 9.70E-05 | 1 | KFDDAAVQSDMK                          | 1.47E+05 | parkin null-Rep II |
| gil103190   | FBgn0001219 | 416.56  | 1246.66 | 1246.67 | -0.01 | 0 | 30 | 0.016    | 1 | LVTHFVQEFK                            | 3.67E+06 | parkin null-Rep II |
| gil103190   | FBgn0001219 | 416.56  | 1246.66 | 1246.67 | -0.01 | 0 | 25 | 0.049    | 1 | LVTHFVQEFK                            | 4.12E+06 | control-Rep II     |
| gil103190   | FBgn0001219 | 416.56  | 1246.66 | 1246.67 | -0.01 | 0 | 27 | 0.028    | 1 | LVTHFVQEFK                            | 4.61E+06 | parkin null-Rep I  |



|             |             |        |         |         |       |   |    |          |   |                     |          |                    |
|-------------|-------------|--------|---------|---------|-------|---|----|----------|---|---------------------|----------|--------------------|
| gil28571721 | FBgn0001219 | 416.56 | 1246.66 | 1246.67 | -0.01 | 0 | 26 | 0.039    | 1 | LVTHFVQEFK          | 1.01E+07 | control-Rep I      |
| gil103190   | FBgn0001219 | 620.81 | 1239.61 | 1239.62 | 0     | 1 | 52 | 8.60E-05 | 1 | MKETAEAYLGK         | 9.08E+05 | parkin null-Rep II |
| gil103190   | FBgn0001219 | 620.81 | 1239.61 | 1239.62 | -0.01 | 1 | 50 | 0.00013  | 1 | MKETAEAYLGK         | 1.46E+06 | control-Rep II     |
| gil103190   | FBgn0001219 | 620.82 | 1239.62 | 1239.62 | 0     | 1 | 57 | 2.30E-05 | 1 | MKETAEAYLGK         | 1.93E+06 | parkin null-Rep I  |
| gil28571721 | FBgn0001219 | 414.21 | 1239.61 | 1239.62 | -0.01 | 1 | 27 | 0.038    | 1 | MKETAEAYLGK         | 2.21E+06 | control-Rep I      |
| gil103190   | FBgn0001219 | 564.58 | 1690.72 | 1690.72 | 0     | 0 | 29 | 0.0053   | 1 | STAGDTHLGGEDFDNR    | 1.08E+06 | parkin null-Rep I  |
| gil28571721 | FBgn0001219 | 564.58 | 1690.72 | 1690.72 | 0     | 0 | 24 | 0.018    | 1 | STAGDTHLGGEDFDNR    | 1.14E+06 | control-Rep I      |
| gil103190   | FBgn0001219 | 564.58 | 1690.72 | 1690.72 | 0     | 0 | 26 | 0.01     | 1 | STAGDTHLGGEDFDNR    | 1.16E+06 | parkin null-Rep II |
| gil103190   | FBgn0001219 | 564.58 | 1690.72 | 1690.72 | 0     | 0 | 26 | 0.012    | 1 | STAGDTHLGGEDFDNR    | 1.36E+06 | control-Rep II     |
| gil103190   | FBgn0001219 | 726.91 | 1451.81 | 1451.81 | 0     | 0 | 38 | 0.0019   | 1 | SVIHDIVLVGGSTR      | 8.04E+06 | parkin null-Rep II |
| gil103190   | FBgn0001219 | 726.91 | 1451.81 | 1451.81 | 0     | 0 | 49 | 0.00014  | 1 | SVIHDIVLVGGSTR      | 9.71E+06 | control-Rep II     |
| gil28571721 | FBgn0001219 | 726.91 | 1451.81 | 1451.81 | 0     | 0 | 44 | 0.00045  | 1 | SVIHDIVLVGGSTR      | 1.35E+07 | control-Rep I      |
| gil103190   | FBgn0001219 | 814.92 | 1627.83 | 1627.82 | 0.01  | 0 | 27 | 0.03     | 1 | TFFPEEISSMVLTK      | 9.63E+06 | control-Rep II     |
| gil103190   | FBgn0001219 | 814.92 | 1627.83 | 1627.82 | 0.01  | 0 | 22 | 0.094    | 1 | TFFPEEISSMVLTK      | 1.05E+07 | parkin null-Rep I  |
| gil103190   | FBgn0001219 | 998.51 | 1995.01 | 1995.01 | 0     | 0 | 49 | 0.00014  | 1 | TVTNAVITVPAYFNDSQR  | 1.39E+07 | parkin null-Rep II |
| gil103190   | FBgn0001219 | 998.52 | 1995.03 | 1995.01 | 0.02  | 0 | 55 | 3.60E-05 | 1 | TVTNAVITVPAYFNDSQR  | 1.42E+07 | control-Rep II     |
| gil28571721 | FBgn0001219 | 998.51 | 1995    | 1995.01 | -0.01 | 0 | 45 | 0.00042  | 1 | TVTNAVITVPAYFNDSQR  | 1.69E+07 | control-Rep I      |
| gil103190   | FBgn0001219 | 998.52 | 1995.02 | 1995.01 | 0.01  | 0 | 32 | 0.0069   | 1 | TVTNAVITVPAYFNDSQR  | 1.93E+07 | parkin null-Rep I  |
| gil103190   | FBgn0001219 | 614.82 | 1227.62 | 1227.62 | 0     | 0 | 30 | 0.015    | 1 | VEIANDQGNR          | 1.87E+06 | parkin null-Rep II |
| gil103190   | FBgn0001219 | 614.82 | 1227.62 | 1227.62 | 0     | 0 | 34 | 0.0057   | 1 | VEIANDQGNR          | 2.67E+06 | parkin null-Rep I  |
| gil28571721 | FBgn0001219 | 614.82 | 1227.62 | 1227.62 | 0     | 0 | 41 | 0.0012   | 1 | VEIANDQGNR          | 3.40E+06 | control-Rep I      |
| gil103190   | FBgn0001219 | 614.82 | 1227.62 | 1227.62 | 0     | 0 | 43 | 0.00081  | 1 | VEIANDQGNR          | 3.50E+06 | control-Rep II     |
| gil103190   | FBgn0001219 | 672.98 | 2015.92 | 2015.93 | -0.02 | 1 | 21 | 0.041    | 1 | WLDANQLADKEEYHR     | 3.69E+06 | control-Rep II     |
| gil103190   | FBgn0001219 | 672.99 | 2015.95 | 2015.93 | 0.01  | 1 | 34 | 0.0045   | 1 | WLDANQLADKEEYHR     | 3.75E+06 | parkin null-Rep II |
| gil103190   | FBgn0001219 | 672.99 | 2015.95 | 2015.93 | 0.01  | 1 | 28 | 0.017    | 1 | WLDANQLADKEEYHR     | 4.06E+06 | parkin null-Rep I  |
| gil17737553 | FBgn0001224 | 864.97 | 1727.92 | 1727.9  | 0.02  | 0 | 73 | 7.60E-07 | 1 | NPYLALVGPMEQQLR     | 1.05E+07 | parkin null-Rep II |
| gil17737553 | FBgn0001224 | 864.96 | 1727.91 | 1727.9  | 0.01  | 0 | 64 | 6.00E-06 | 1 | NPYLALVGPMEQQLR     | 1.26E+07 | control-Rep II     |
| gil17737553 | FBgn0001224 | 864.96 | 1727.91 | 1727.9  | 0     | 0 | 55 | 4.70E-05 | 1 | NPYLALVGPMEQQLR     | 1.41E+07 | parkin null-Rep I  |
| gil17737553 | FBgn0001224 | 864.96 | 1727.9  | 1727.9  | 0     | 0 | 63 | 7.60E-06 | 1 | NPYLALVGPMEQQLR     | 1.82E+07 | control-Rep I      |
| gil17737553 | FBgn0001224 | 575.61 | 1723.81 | 1723.81 | 0     | 0 | 29 | 0.0085   | 1 | VQDNSVLVEGNHEER     | 1.20E+06 | parkin null-Rep II |
| gil17737553 | FBgn0001224 | 575.61 | 1723.82 | 1723.81 | 0.01  | 0 | 37 | 0.0018   | 1 | VQDNSVLVEGNHEER     | 1.27E+06 | parkin null-Rep I  |
| gil17737553 | FBgn0001224 | 575.61 | 1723.81 | 1723.81 | 0     | 0 | 30 | 0.007    | 1 | VQDNSVLVEGNHEER     | 1.84E+06 | control-Rep II     |
| gil17737553 | FBgn0001224 | 575.61 | 1723.81 | 1723.81 | 0     | 0 | 33 | 0.0031   | 1 | VQDNSVLVEGNHEER     | 1.96E+06 | control-Rep I      |
| gil17647529 | FBgn0001233 | 626.3  | 1250.59 | 1250.59 | 0     | 0 | 49 | 0.00011  | 1 | DQVNSAFVER          | 3.73E+06 | parkin null-Rep II |
| gil17647529 | FBgn0001233 | 626.3  | 1250.59 | 1250.59 | 0     | 0 | 43 | 0.00036  | 1 | DQVNSAFVER          | 4.70E+06 | parkin null-Rep I  |
| gil17647529 | FBgn0001233 | 626.3  | 1250.59 | 1250.59 | 0     | 0 | 53 | 4.50E-05 | 1 | DQVNSAFVER          | 5.49E+06 | control-Rep II     |
| gil17647529 | FBgn0001233 | 626.3  | 1250.59 | 1250.59 | 0     | 0 | 42 | 0.00055  | 1 | DQVNSAFVER          | 6.04E+06 | control-Rep I      |
| gil17647529 | FBgn0001233 | 712.31 | 2133.9  | 2133.91 | -0.01 | 0 | 36 | 0.00042  | 1 | FHTSASGDDFCSLADYVSR | 1.17E+07 | parkin null-Rep I  |
| gil17647529 | FBgn0001233 | 712.31 | 2133.91 | 2133.91 | 0     | 0 | 33 | 0.0011   | 1 | FHTSASGDDFCSLADYVSR | 1.19E+07 | parkin null-Rep II |

|             |             |         |         |         |       |   |    |          |   |                       |          |                    |
|-------------|-------------|---------|---------|---------|-------|---|----|----------|---|-----------------------|----------|--------------------|
| gij17647529 | FBgn0001233 | 712.31  | 2133.91 | 2133.91 | 0.01  | 0 | 26 | 0.006    | 1 | FHTSASGDDFCSLADYVSR   | 1.21E+07 | control-Rep I      |
| gij17647529 | FBgn0001233 | 804.08  | 2409.22 | 2409.19 | 0.03  | 0 | 22 | 0.091    | 1 | GFEVYVMTEPIDEYVIQHLK  | 1.16E+07 | parkin null-Rep I  |
| gij17647529 | FBgn0001233 | 804.07  | 2409.19 | 2409.19 | -0.01 | 0 | 37 | 0.0022   | 1 | GFEVYVMTEPIDEYVIQHLK  | 1.51E+07 | control-Rep I      |
| gij17647529 | FBgn0001233 | 757.4   | 1512.79 | 1512.78 | 0.01  | 0 | 32 | 0.019    | 1 | GVVDSDELPLNISR        | 1.55E+07 | parkin null-Rep II |
| gij17647529 | FBgn0001233 | 757.4   | 1512.79 | 1512.78 | 0.01  | 0 | 39 | 0.0035   | 1 | GVVDSDELPLNISR        | 1.64E+07 | parkin null-Rep I  |
| gij17647529 | FBgn0001233 | 757.39  | 1512.77 | 1512.78 | 0     | 0 | 63 | 6.20E-06 | 1 | GVVDSDELPLNISR        | 1.83E+07 | control-Rep II     |
| gij17647529 | FBgn0001233 | 757.4   | 1512.79 | 1512.78 | 0.01  | 0 | 46 | 0.00065  | 1 | GVVDSDELPLNISR        | 1.92E+07 | control-Rep I      |
| gij17647529 | FBgn0001233 | 796.93  | 1591.85 | 1591.85 | 0     | 0 | 64 | 5.60E-06 | 1 | TAGTLTIIDTGIGMTK      | 1.94E+07 | parkin null-Rep I  |
| gij17647529 | FBgn0001233 | 796.94  | 1591.86 | 1591.85 | 0.01  | 0 | 74 | 5.60E-07 | 1 | TAGTLTIIDTGIGMTK      | 2.11E+07 | parkin null-Rep II |
| gij17647529 | FBgn0001233 | 796.94  | 1591.86 | 1591.85 | 0.01  | 0 | 77 | 2.70E-07 | 1 | TAGTLTIIDTGIGMTK      | 2.24E+07 | control-Rep II     |
| gij17647529 | FBgn0001233 | 796.93  | 1591.84 | 1591.85 | -0.01 | 0 | 64 | 5.70E-06 | 1 | TAGTLTIIDTGIGMTK      | 2.67E+07 | control-Rep I      |
| gij17647529 | FBgn0001233 | 705.02  | 2112.04 | 2112.03 | 0.01  | 2 | 31 | 0.01     | 1 | TMELIEELTEDKENYKK     | 6.61E+06 | parkin null-Rep I  |
| gij17647529 | FBgn0001233 | 705.02  | 2112.04 | 2112.03 | 0.01  | 2 | 34 | 0.0059   | 1 | TMELIEELTEDKENYKK     | 6.78E+06 | parkin null-Rep II |
| gij17647529 | FBgn0001233 | 1196.06 | 2390.11 | 2390.1  | 0.01  | 0 | 41 | 0.00052  | 1 | VFIMDNCEDLIPEYLNFMK   | 2.34E+06 | parkin null-Rep II |
| gij17647529 | FBgn0001233 | 1196.06 | 2390.1  | 2390.1  | 0     | 0 | 52 | 4.20E-05 | 1 | VFIMDNCEDLIPEYLNFMK   | 2.91E+06 | parkin null-Rep I  |
| gij17647529 | FBgn0001233 | 1196.06 | 2390.11 | 2390.1  | 0.01  | 0 | 40 | 0.0007   | 1 | VFIMDNCEDLIPEYLNFMK   | 3.06E+06 | control-Rep II     |
| gij17647529 | FBgn0001233 | 1196.06 | 2390.11 | 2390.1  | 0.01  | 0 | 52 | 4.30E-05 | 1 | VFIMDNCEDLIPEYLNFMK   | 4.70E+06 | control-Rep I      |
| gij24660868 | FBgn0001248 | 729.87  | 1457.72 | 1457.72 | 0.01  | 0 | 44 | 0.00052  | 1 | AGPVVDVLDGEMTR        | 1.39E+07 | control-Rep II     |
| gij24660868 | FBgn0001248 | 729.86  | 1457.71 | 1457.72 | -0.01 | 0 | 45 | 0.00044  | 1 | AGPVVDVLDGEMTR        | 1.72E+07 | control-Rep I      |
| gij24660868 | FBgn0001248 | 729.87  | 1457.72 | 1457.72 | 0.01  | 0 | 56 | 3.10E-05 | 1 | AGPVVDVLDGEMTR        | 1.78E+07 | parkin null-Rep II |
| gij24660868 | FBgn0001248 | 729.87  | 1457.72 | 1457.72 | 0     | 0 | 56 | 3.20E-05 | 1 | AGPVVDVLDGEMTR        | 1.92E+07 | parkin null-Rep I  |
| gij24660868 | FBgn0001248 | 825.41  | 1648.8  | 1648.79 | 0     | 0 | 87 | 2.90E-08 | 1 | GTDGQVIDEVINDFK       | 1.13E+07 | parkin null-Rep I  |
| gij24660868 | FBgn0001248 | 825.4   | 1648.79 | 1648.79 | -0.01 | 0 | 74 | 9.20E-07 | 1 | GTDGQVIDEVINDFK       | 1.17E+07 | control-Rep II     |
| gij24660868 | FBgn0001248 | 825.41  | 1648.81 | 1648.79 | 0.01  | 0 | 74 | 5.60E-07 | 1 | GTDGQVIDEVINDFK       | 1.24E+07 | control-Rep I      |
| gij24660868 | FBgn0001248 | 825.41  | 1648.8  | 1648.79 | 0.01  | 0 | 87 | 2.60E-08 | 1 | GTDGQVIDEVINDFK       | 1.49E+07 | parkin null-Rep II |
| gij24660868 | FBgn0001248 | 671.34  | 1340.67 | 1340.67 | 0     | 0 | 37 | 0.0049   | 1 | TVEAEAAHGTVTR         | 1.26E+05 | control-Rep II     |
| gij24660868 | FBgn0001248 | 671.34  | 1340.67 | 1340.67 | 0     | 0 | 32 | 0.016    | 1 | TVEAEAAHGTVTR         | 2.62E+05 | parkin null-Rep I  |
| gij418925   | FBgn0001942 | 527.61  | 1579.81 | 1579.81 | -0.01 | 0 | 27 | 0.031    | 1 | ILESGCHVVVGTGPR       | 3.59E+06 | parkin null-Rep II |
| gij418925   | FBgn0001942 | 527.61  | 1579.81 | 1579.81 | -0.01 | 0 | 32 | 0.0086   | 1 | ILESGCHVVVGTGPR       | 4.36E+06 | parkin null-Rep I  |
| gij418925   | FBgn0001942 | 527.61  | 1579.81 | 1579.81 | -0.01 | 0 | 24 | 0.057    | 1 | ILESGCHVVVGTGPR       | 5.43E+06 | control-Rep II     |
| gij418925   | FBgn0001942 | 769.38  | 1536.75 | 1536.75 | 0     | 0 | 68 | 3.40E-06 | 1 | LFVLDEADEMLSR         | 8.22E+06 | control-Rep II     |
| gij418925   | FBgn0001942 | 769.39  | 1536.76 | 1536.75 | 0.01  | 0 | 52 | 7.80E-05 | 1 | LFVLDEADEMLSR         | 1.08E+07 | parkin null-Rep I  |
| gij418925   | FBgn0001942 | 769.39  | 1536.77 | 1536.75 | 0.02  | 0 | 60 | 1.10E-05 | 1 | LFVLDEADEMLSR         | 1.13E+07 | parkin null-Rep II |
| gij418925   | FBgn0001942 | 769.38  | 1536.75 | 1536.75 | 0     | 0 | 61 | 9.10E-06 | 1 | LFVLDEADEMLSR         | 1.40E+07 | control-Rep I      |
| gij85042    | FBgn0002525 | 705.33  | 1408.65 | 1408.64 | 0     | 0 | 50 | 0.00012  | 1 | AQYEEQMQRNR           | 2.47E+06 | parkin null-Rep I  |
| gij85042    | FBgn0002525 | 705.33  | 1408.64 | 1408.64 | 0     | 0 | 55 | 1.90E-05 | 1 | AQYEEQMQRNR           | 2.64E+06 | parkin null-Rep II |
| gij85042    | FBgn0002525 | 705.32  | 1408.63 | 1408.64 | -0.01 | 0 | 59 | 6.60E-06 | 1 | AQYEEQMQRNR           | 3.97E+06 | control-Rep II     |
| gij85042    | FBgn0002525 | 748.01  | 2241.01 | 2241.01 | 0     | 0 | 41 | 0.00043  | 1 | AVVDESEDHSVADYYVSASAK | 1.96E+06 | parkin null-Rep II |
| gij85042    | FBgn0002525 | 748.01  | 2241.01 | 2241.01 | 0     | 0 | 34 | 0.0021   | 1 | AVVDESEDHSVADYYVSASAK | 2.89E+06 | control-Rep I      |

|             |             |         |         |         |       |   |    |          |   |                            |          |                    |
|-------------|-------------|---------|---------|---------|-------|---|----|----------|---|----------------------------|----------|--------------------|
| gij85042    | FBgn0002525 | 644.35  | 1286.69 | 1286.68 | 0     | 0 | 52 | 0.00019  | 1 | VDLENTIQSLR                | 4.33E+06 | parkin null-Rep II |
| gij85042    | FBgn0002525 | 644.35  | 1286.69 | 1286.68 | 0     | 0 | 68 | 4.50E-06 | 1 | VDLENTIQSLR                | 4.66E+06 | parkin null-Rep I  |
| gij85042    | FBgn0002525 | 644.35  | 1286.69 | 1286.68 | 0     | 0 | 64 | 1.40E-05 | 1 | VDLENTIQSLR                | 5.78E+06 | control-Rep I      |
| gij17647601 | FBgn0002564 | 530.26  | 1587.77 | 1587.77 | 0     | 0 | 27 | 0.026    | 1 | FVDTKKPGYPFDR              | 1.18E+07 | parkin null-Rep II |
| gij17647601 | FBgn0002564 | 530.27  | 1587.78 | 1587.77 | 0.01  | 0 | 30 | 0.014    | 1 | FVDTKKPGYPFDR              | 1.27E+07 | parkin null-Rep I  |
| gij2454565  | FBgn0002564 | 775.39  | 1548.77 | 1548.75 | 0.01  | 0 | 70 | 1.40E-06 | 1 | IDEPLMFEEWIK               | 7.40E+06 | control-Rep II     |
| gij2454565  | FBgn0002564 | 775.39  | 1548.77 | 1548.75 | 0.01  | 0 | 58 | 4.80E-05 | 1 | IDEPLMFEEWIK               | 9.02E+06 | control-Rep I      |
| gij17647601 | FBgn0002564 | 775.39  | 1548.76 | 1548.75 | 0.01  | 0 | 61 | 1.60E-05 | 1 | IDEPLMFEEWIK               | 4.09E+07 | parkin null-Rep II |
| gij17647601 | FBgn0002564 | 775.39  | 1548.76 | 1548.75 | 0.01  | 0 | 62 | 9.80E-06 | 1 | IDEPLMFEEWIK               | 4.48E+07 | parkin null-Rep I  |
| gij17647601 | FBgn0002564 | 751.86  | 1501.7  | 1501.69 | 0.01  | 0 | 76 | 2.20E-07 | 1 | MTFVDGQYIWDK               | 1.80E+07 | parkin null-Rep I  |
| gij17647601 | FBgn0002564 | 751.86  | 1501.71 | 1501.69 | 0.02  | 0 | 75 | 2.50E-07 | 1 | MTFVDGQYIWDK               | 2.10E+07 | parkin null-Rep II |
| gij17647601 | FBgn0002564 | 1137.6  | 2273.19 | 2273.17 | 0.01  | 0 | 80 | 8.90E-08 | 1 | NFVQIDSFVYPPFIAGTNTIK      | 4.30E+06 | parkin null-Rep II |
| gij17647601 | FBgn0002564 | 1137.59 | 2273.17 | 2273.17 | -0.01 | 0 | 92 | 1.20E-08 | 1 | NFVQIDSFVYPPFIAGTNTIK      | 4.39E+06 | parkin null-Rep I  |
| gij17647601 | FBgn0002564 | 895.43  | 1788.84 | 1788.84 | 0.01  | 0 | 56 | 2.20E-05 | 1 | QIDESDFVPNGFFK             | 1.00E+07 | parkin null-Rep II |
| gij17647601 | FBgn0002564 | 895.44  | 1788.86 | 1788.84 | 0.03  | 0 | 50 | 9.90E-05 | 1 | QIDESDFVPNGFFK             | 1.05E+07 | parkin null-Rep I  |
| gij17647601 | FBgn0002564 | 678.32  | 2031.94 | 2031.93 | 0.01  | 0 | 41 | 0.00052  | 1 | YDFPLDISEPHNAFPDR          | 3.32E+07 | parkin null-Rep II |
| gij17647601 | FBgn0002564 | 678.32  | 2031.93 | 2031.93 | 0     | 0 | 45 | 0.00023  | 1 | YDFPLDISEPHNAFPDR          | 3.42E+07 | parkin null-Rep I  |
| gij2495185  | FBgn0002565 | 830.44  | 2488.29 | 2488.28 | 0.01  | 1 | 58 | 2.00E-05 | 1 | FDVETINVLGNIIQGNADSVDKK    | 5.87E+07 | control-Rep II     |
| gij2495185  | FBgn0002565 | 830.44  | 2488.29 | 2488.28 | 0.01  | 1 | 59 | 1.70E-05 | 1 | FDVETINVLGNIIQGNADSVDKK    | 6.93E+07 | control-Rep I      |
| gij17864446 | FBgn0002565 | 830.44  | 2488.29 | 2488.28 | 0.01  | 1 | 61 | 1.10E-05 | 1 | FDVETINVLGNIIQGNADSVDKK    | 9.36E+07 | parkin null-Rep II |
| gij17864446 | FBgn0002565 | 830.44  | 2488.3  | 2488.28 | 0.01  | 1 | 65 | 3.90E-06 | 1 | FDVETINVLGNIIQGNADSVDKK    | 1.06E+08 | parkin null-Rep I  |
| gij2495185  | FBgn0002565 | 586.62  | 1756.83 | 1756.83 | 0     | 1 | 25 | 0.032    | 1 | FKLDQSEAHCGVPNR            | 1.21E+06 | control-Rep I      |
| gij17864446 | FBgn0002565 | 586.62  | 1756.83 | 1756.83 | 0     | 1 | 22 | 0.066    | 1 | FKLDQSEAHCGVPNR            | 1.41E+06 | parkin null-Rep II |
| gij17864446 | FBgn0002565 | 495.56  | 1483.66 | 1483.65 | 0.01  | 0 | 31 | 0.003    | 1 | HDYYFDVHNFK                | 7.45E+06 | parkin null-Rep II |
| gij2495185  | FBgn0002565 | 495.56  | 1483.66 | 1483.65 | 0.01  | 0 | 33 | 0.0018   | 1 | HDYYFDVHNFK                | 9.81E+06 | control-Rep I      |
| gij17864446 | FBgn0002565 | 579.26  | 1156.51 | 1156.51 | 0     | 0 | 23 | 0.049    | 1 | LMDATNSDYK                 | 1.16E+05 | parkin null-Rep II |
| gij17864446 | FBgn0002565 | 579.26  | 1156.51 | 1156.51 | 0     | 0 | 25 | 0.028    | 1 | LMDATNSDYK                 | 1.73E+05 | parkin null-Rep I  |
| gij2495185  | FBgn0002565 | 945.98  | 1889.95 | 1889.95 | -0.01 | 0 | 39 | 0.0021   | 1 | LNHKPFEFITLDVTSDK          | 8.68E+06 | control-Rep I      |
| gij17864446 | FBgn0002565 | 630.99  | 1889.95 | 1889.95 | 0     | 0 | 38 | 0.0026   | 1 | LNHKPFEFITLDVTSDK          | 3.18E+07 | parkin null-Rep II |
| gij17864446 | FBgn0002565 | 630.99  | 1889.95 | 1889.95 | 0     | 0 | 47 | 0.0003   | 1 | LNHKPFEFITLDVTSDK          | 3.75E+07 | parkin null-Rep I  |
| gij2495185  | FBgn0002565 | 956.46  | 2866.36 | 2866.36 | 0     | 0 | 35 | 0.008    | 1 | LSHDLGEVPAFNMYVPTESGYASNLR | 5.55E+06 | control-Rep II     |
| gij2495185  | FBgn0002565 | 956.47  | 2866.39 | 2866.36 | 0.03  | 0 | 47 | 0.00059  | 1 | LSHDLGEVPAFNMYVPTESGYASNLR | 6.99E+06 | control-Rep I      |
| gij17864446 | FBgn0002565 | 956.46  | 2866.35 | 2866.36 | -0.01 | 0 | 29 | 0.017    | 1 | LSHDLGEVPAFNMYVPTESGYASNLR | 1.35E+07 | parkin null-Rep I  |
| gij2495185  | FBgn0002565 | 682.85  | 1363.69 | 1363.69 | -0.01 | 0 | 24 | 0.072    | 1 | QMDNIYNVVIR                | 1.21E+07 | control-Rep II     |
| gij2495185  | FBgn0002565 | 682.85  | 1363.69 | 1363.69 | 0     | 0 | 25 | 0.047    | 1 | QMDNIYNVVIR                | 1.39E+07 | control-Rep I      |
| gij17864446 | FBgn0002565 | 682.86  | 1363.7  | 1363.69 | 0     | 0 | 28 | 0.028    | 1 | QMDNIYNVVIR                | 1.87E+07 | parkin null-Rep II |
| gij17864446 | FBgn0002565 | 406.23  | 1215.67 | 1215.67 | 0     | 0 | 51 | 0.00018  | 1 | VHLEAGVNHK                 | 2.65E+06 | parkin null-Rep II |
| gij2495185  | FBgn0002565 | 406.23  | 1215.67 | 1215.67 | 0     | 0 | 48 | 0.00033  | 1 | VHLEAGVNHK                 | 2.76E+06 | control-Rep II     |
| gij2495185  | FBgn0002565 | 406.23  | 1215.67 | 1215.67 | 0     | 0 | 48 | 0.00034  | 1 | VHLEAGVNHK                 | 3.86E+06 | control-Rep I      |

|             |             |         |         |         |       |   |     |          |   |                                 |          |                    |
|-------------|-------------|---------|---------|---------|-------|---|-----|----------|---|---------------------------------|----------|--------------------|
| gil17864446 | FBgn0002565 | 406.23  | 1215.67 | 1215.67 | 0     | 0 | 52  | 0.00013  | 1 | VHLEAGVNHK                      | 5.45E+06 | parkin null-Rep I  |
| gil17864446 | FBgn0002565 | 458.27  | 1371.79 | 1371.77 | 0.01  | 1 | 27  | 0.074    | 1 | VHLEAGVNHK                      | 3.89E+05 | parkin null-Rep II |
| gil17864446 | FBgn0002565 | 458.26  | 1371.77 | 1371.77 | 0     | 1 | 36  | 0.0033   | 1 | VHLEAGVNHK                      | 8.09E+05 | parkin null-Rep I  |
| gil71167    | FBgn0002593 | 895.97  | 1789.93 | 1789.9  | 0.02  | 0 | 53  | 8.50E-05 | 1 | AANVEVEPYWPLFAK                 | 1.49E+07 | parkin null-Rep II |
| gil71167    | FBgn0002593 | 895.97  | 1789.92 | 1789.9  | 0.02  | 0 | 57  | 2.90E-05 | 1 | AANVEVEPYWPLFAK                 | 1.67E+07 | control-Rep II     |
| gil71167    | FBgn0002593 | 895.96  | 1789.91 | 1789.9  | 0     | 0 | 65  | 4.60E-06 | 1 | AANVEVEPYWPLFAK                 | 1.92E+07 | control-Rep I      |
| gil71167    | FBgn0002593 | 1359.69 | 2717.37 | 2717.4  | -0.03 | 0 | 143 | 7.80E-14 | 1 | DLITNIGSGVGAAPAGGAAPAAAAAATAESK | 5.71E+06 | parkin null-Rep II |
| gil71167    | FBgn0002593 | 1359.7  | 2717.39 | 2717.4  | -0.01 | 0 | 116 | 3.80E-11 | 1 | DLITNIGSGVGAAPAGGAAPAAAAAATAESK | 8.15E+06 | control-Rep II     |
| gil71167    | FBgn0002593 | 906.81  | 2717.41 | 2717.4  | 0.01  | 0 | 57  | 2.00E-05 | 1 | DLITNIGSGVGAAPAGGAAPAAAAAATAESK | 1.20E+07 | control-Rep I      |
| gil482955   | FBgn0002741 | 759.37  | 2275.1  | 2275.09 | 0.01  | 0 | 45  | 0.00033  | 1 | AEDMSNLTLYLNDASVLHNL            | 3.24E+07 | parkin null-Rep II |
| gil482955   | FBgn0002741 | 759.37  | 2275.1  | 2275.09 | 0.01  | 0 | 50  | 8.60E-05 | 1 | AEDMSNLTLYLNDASVLHNL            | 3.25E+07 | control-Rep II     |
| gil482955   | FBgn0002741 | 759.37  | 2275.09 | 2275.09 | 0     | 0 | 52  | 5.10E-05 | 1 | AEDMSNLTLYLNDASVLHNL            | 3.88E+07 | control-Rep I      |
| gil482955   | FBgn0002741 | 759.37  | 2275.09 | 2275.09 | 0     | 0 | 39  | 0.001    | 1 | AEDMSNLTLYLNDASVLHNL            | 3.91E+07 | parkin null-Rep I  |
| gil482955   | FBgn0002741 | 944.99  | 1887.96 | 1887.94 | 0.02  | 1 | 90  | 1.40E-08 | 1 | AKLEQTLDELEDSL                  | 1.97E+07 | control-Rep I      |
| gil482955   | FBgn0002741 | 944.98  | 1887.95 | 1887.94 | 0     | 1 | 86  | 3.50E-08 | 1 | AKLEQTLDELEDSL                  | 2.34E+07 | parkin null-Rep I  |
| gil482955   | FBgn0002741 | 944.98  | 1887.94 | 1887.94 | 0     | 1 | 81  | 1.00E-07 | 1 | AKLEQTLDELEDSL                  | 2.45E+07 | parkin null-Rep II |
| gil482955   | FBgn0002741 | 944.99  | 1887.96 | 1887.94 | 0.02  | 1 | 86  | 4.00E-08 | 1 | AKLEQTLDELEDSL                  | 3.28E+07 | control-Rep II     |
| gil482955   | FBgn0002741 | 732.36  | 1462.7  | 1462.7  | 0     | 0 | 102 | 6.20E-10 | 1 | ALDSMQASLEAEAK                  | 2.25E+07 | control-Rep II     |
| gil482955   | FBgn0002741 | 732.36  | 1462.7  | 1462.7  | 0     | 0 | 102 | 6.70E-10 | 1 | ALDSMQASLEAEAK                  | 2.29E+07 | parkin null-Rep II |
| gil482955   | FBgn0002741 | 732.36  | 1462.7  | 1462.7  | 0     | 0 | 102 | 6.40E-10 | 1 | ALDSMQASLEAEAK                  | 2.62E+07 | parkin null-Rep I  |
| gil482955   | FBgn0002741 | 732.36  | 1462.7  | 1462.7  | 0     | 0 | 102 | 7.00E-10 | 1 | ALDSMQASLEAEAK                  | 3.40E+07 | control-Rep I      |
| gil482955   | FBgn0002741 | 522.76  | 1043.51 | 1043.51 | 0     | 0 | 52  | 8.00E-05 | 1 | ANAEQVWR                        | 9.87E+06 | parkin null-Rep II |
| gil482955   | FBgn0002741 | 522.76  | 1043.51 | 1043.51 | -0.01 | 0 | 41  | 0.00069  | 1 | ANAEQVWR                        | 1.76E+07 | control-Rep II     |
| gil482955   | FBgn0002741 | 522.77  | 1043.53 | 1043.51 | 0.01  | 0 | 42  | 0.001    | 1 | ANAEQVWR                        | 2.28E+07 | parkin null-Rep I  |
| gil482955   | FBgn0002741 | 522.3   | 1042.59 | 1042.58 | 0.01  | 0 | 34  | 0.0093   | 1 | AQLELSQVR                       | 1.12E+06 | parkin null-Rep II |
| gil482955   | FBgn0002741 | 522.3   | 1042.59 | 1042.58 | 0.01  | 0 | 46  | 0.00065  | 1 | AQLELSQVR                       | 1.20E+06 | parkin null-Rep I  |
| gil482955   | FBgn0002741 | 522.3   | 1042.59 | 1042.58 | 0.01  | 0 | 32  | 0.015    | 1 | AQLELSQVR                       | 2.68E+06 | control-Rep II     |
| gil482955   | FBgn0002741 | 658.34  | 1314.66 | 1314.67 | 0     | 0 | 64  | 5.70E-06 | 1 | DIEDLELNVQK                     | 1.52E+07 | control-Rep II     |
| gil482955   | FBgn0002741 | 658.34  | 1314.66 | 1314.67 | 0     | 0 | 78  | 2.00E-07 | 1 | DIEDLELNVQK                     | 1.91E+07 | parkin null-Rep II |
| gil482955   | FBgn0002741 | 658.34  | 1314.67 | 1314.67 | 0     | 0 | 77  | 2.60E-07 | 1 | DIEDLELNVQK                     | 2.21E+07 | parkin null-Rep I  |
| gil482955   | FBgn0002741 | 658.34  | 1314.67 | 1314.67 | 0     | 0 | 59  | 3.20E-05 | 1 | DIEDLELNVQK                     | 2.31E+07 | control-Rep I      |
| gil482955   | FBgn0002741 | 666.32  | 1330.63 | 1330.64 | -0.01 | 0 | 44  | 0.00073  | 1 | DIQTALEEEQR                     | 4.12E+06 | parkin null-Rep II |
| gil482955   | FBgn0002741 | 666.33  | 1330.65 | 1330.64 | 0.01  | 0 | 41  | 0.0018   | 1 | DIQTALEEEQR                     | 5.16E+06 | parkin null-Rep I  |
| gil482955   | FBgn0002741 | 666.32  | 1330.63 | 1330.64 | -0.01 | 0 | 44  | 0.00078  | 1 | DIQTALEEEQR                     | 5.66E+06 | control-Rep II     |
| gil482955   | FBgn0002741 | 666.33  | 1330.64 | 1330.64 | 0     | 0 | 59  | 1.50E-05 | 1 | DIQTALEEEQR                     | 5.72E+06 | control-Rep I      |
| gil482955   | FBgn0002741 | 651.66  | 1951.96 | 1951.96 | 0     | 0 | 29  | 0.017    | 1 | DLEEANIQUESTLANLR               | 9.15E+07 | control-Rep II     |
| gil482955   | FBgn0002741 | 651.66  | 1951.96 | 1951.96 | 0     | 0 | 34  | 0.0053   | 1 | DLEEANIQUESTLANLR               | 9.85E+07 | parkin null-Rep II |
| gil482955   | FBgn0002741 | 651.66  | 1951.96 | 1951.96 | 0     | 0 | 29  | 0.019    | 1 | DLEEANIQUESTLANLR               | 1.03E+08 | parkin null-Rep I  |
| gil482955   | FBgn0002741 | 651.66  | 1951.96 | 1951.96 | 0     | 0 | 34  | 0.0064   | 1 | DLEEANIQUESTLANLR               | 1.15E+08 | control-Rep I      |

|           |             |         |         |         |       |   |     |          |   |                       |          |                    |
|-----------|-------------|---------|---------|---------|-------|---|-----|----------|---|-----------------------|----------|--------------------|
| gii482955 | FBgn0002741 | 666.31  | 1330.61 | 1330.6  | 0.01  | 0 | 38  | 0.0023   | 1 | ELENELDGEQR           | 1.84E+06 | parkin null-Rep II |
| gii482955 | FBgn0002741 | 666.31  | 1330.61 | 1330.6  | 0.01  | 0 | 34  | 0.0049   | 1 | ELENELDGEQR           | 2.11E+06 | parkin null-Rep I  |
| gii482955 | FBgn0002741 | 666.31  | 1330.61 | 1330.6  | 0.01  | 0 | 52  | 9.10E-05 | 1 | ELENELDGEQR           | 2.43E+06 | control-Rep II     |
| gii482955 | FBgn0002741 | 684.33  | 1366.65 | 1366.64 | 0.01  | 1 | 53  | 9.70E-05 | 1 | ELSFQSEEDRK           | 1.51E+06 | parkin null-Rep II |
| gii482955 | FBgn0002741 | 684.32  | 1366.63 | 1366.64 | -0.01 | 1 | 31  | 0.01     | 1 | ELSFQSEEDRK           | 2.68E+06 | parkin null-Rep I  |
| gii482955 | FBgn0002741 | 684.32  | 1366.63 | 1366.64 | -0.01 | 1 | 51  | 6.10E-05 | 1 | ELSFQSEEDRK           | 2.70E+06 | control-Rep II     |
| gii482955 | FBgn0002741 | 684.32  | 1366.63 | 1366.64 | -0.01 | 1 | 43  | 0.00047  | 1 | ELSFQSEEDRK           | 3.44E+06 | control-Rep I      |
| gii482955 | FBgn0002741 | 466.25  | 930.49  | 930.48  | 0.01  | 0 | 36  | 0.0082   | 1 | EQLGISER              | 1.38E+06 | control-Rep II     |
| gii482955 | FBgn0002741 | 466.25  | 930.49  | 930.48  | 0.01  | 0 | 24  | 0.15     | 1 | EQLGISER              | 1.76E+06 | control-Rep I      |
| gii482955 | FBgn0002741 | 574.26  | 1146.51 | 1146.5  | 0     | 0 | 38  | 0.0013   | 1 | EQVEEEAEGK            | 1.79E+05 | parkin null-Rep II |
| gii482955 | FBgn0002741 | 574.26  | 1146.51 | 1146.5  | 0     | 0 | 43  | 0.00043  | 1 | EQVEEEAEGK            | 5.89E+05 | parkin null-Rep I  |
| gii482955 | FBgn0002741 | 574.26  | 1146.51 | 1146.5  | 0     | 0 | 24  | 0.034    | 1 | EQVEEEAEGK            | 6.90E+05 | control-Rep I      |
| gii482955 | FBgn0002741 | 574.26  | 1146.51 | 1146.5  | 0     | 0 | 33  | 0.0035   | 1 | EQVEEEAEGK            | 7.29E+05 | control-Rep II     |
| gii482955 | FBgn0002741 | 789.87  | 1577.73 | 1577.73 | 0     | 0 | 68  | 1.10E-06 | 1 | GAYEEGQEQLEAVR        | 1.82E+07 | parkin null-Rep II |
| gii482955 | FBgn0002741 | 789.87  | 1577.73 | 1577.73 | 0     | 0 | 77  | 1.70E-07 | 1 | GAYEEGQEQLEAVR        | 2.52E+07 | control-Rep II     |
| gii482955 | FBgn0002741 | 789.87  | 1577.72 | 1577.73 | -0.01 | 0 | 68  | 9.50E-07 | 1 | GAYEEGQEQLEAVR        | 2.59E+07 | control-Rep I      |
| gii482955 | FBgn0002741 | 789.87  | 1577.73 | 1577.73 | 0     | 0 | 82  | 5.20E-08 | 1 | GAYEEGQEQLEAVR        | 2.65E+07 | parkin null-Rep I  |
| gii482955 | FBgn0002741 | 693.37  | 1384.73 | 1384.73 | 0     | 0 | 85  | 5.10E-08 | 1 | GDIVSVGLQGGVVR        | 8.08E+06 | parkin null-Rep I  |
| gii482955 | FBgn0002741 | 693.37  | 1384.73 | 1384.73 | 0     | 0 | 92  | 1.00E-08 | 1 | GDIVSVGLQGGVVR        | 9.89E+06 | control-Rep II     |
| gii482955 | FBgn0002741 | 693.38  | 1384.75 | 1384.73 | 0.01  | 0 | 75  | 8.60E-07 | 1 | GDIVSVGLQGGVVR        | 1.03E+07 | parkin null-Rep II |
| gii482955 | FBgn0002741 | 693.37  | 1384.73 | 1384.73 | -0.01 | 0 | 67  | 5.50E-06 | 1 | GDIVSVGLQGGVVR        | 1.35E+07 | control-Rep I      |
| gii482955 | FBgn0002741 | 572.79  | 1143.56 | 1143.56 | 0     | 0 | 33  | 0.0056   | 1 | GGGFATVSSAYK          | 7.88E+06 | parkin null-Rep I  |
| gii482955 | FBgn0002741 | 572.79  | 1143.57 | 1143.56 | 0.01  | 0 | 30  | 0.013    | 1 | GGGFATVSSAYK          | 9.26E+06 | control-Rep II     |
| gii482955 | FBgn0002741 | 572.78  | 1143.55 | 1143.56 | -0.01 | 0 | 31  | 0.0072   | 1 | GGGFATVSSAYK          | 1.15E+07 | control-Rep I      |
| gii482955 | FBgn0002741 | 739.38  | 2215.13 | 2215.11 | 0.02  | 0 | 84  | 6.30E-08 | 1 | GSLEDQVVQTNPVLEAFGNAK | 1.95E+07 | parkin null-Rep II |
| gii482955 | FBgn0002741 | 1108.57 | 2215.12 | 2215.11 | 0.01  | 0 | 96  | 4.30E-09 | 1 | GSLEDQVVQTNPVLEAFGNAK | 2.03E+07 | parkin null-Rep I  |
| gii482955 | FBgn0002741 | 1108.57 | 2215.13 | 2215.11 | 0.02  | 0 | 85  | 5.10E-08 | 1 | GSLEDQVVQTNPVLEAFGNAK | 2.12E+07 | control-Rep II     |
| gii482955 | FBgn0002741 | 1108.57 | 2215.13 | 2215.11 | 0.01  | 0 | 96  | 4.10E-09 | 1 | GSLEDQVVQTNPVLEAFGNAK | 2.38E+07 | control-Rep I      |
| gii482955 | FBgn0002741 | 956.45  | 1910.88 | 1910.88 | 0     | 0 | 115 | 1.80E-11 | 1 | HNDAVAEMAEQVDQLNK     | 4.58E+07 | parkin null-Rep II |
| gii482955 | FBgn0002741 | 956.44  | 1910.86 | 1910.88 | -0.02 | 0 | 109 | 8.90E-11 | 1 | HNDAVAEMAEQVDQLNK     | 5.04E+07 | parkin null-Rep I  |
| gii482955 | FBgn0002741 | 956.45  | 1910.88 | 1910.88 | 0     | 0 | 108 | 1.20E-10 | 1 | HNDAVAEMAEQVDQLNK     | 5.50E+07 | control-Rep II     |
| gii482955 | FBgn0002741 | 956.45  | 1910.88 | 1910.88 | 0     | 0 | 122 | 4.30E-12 | 1 | HNDAVAEMAEQVDQLNK     | 6.48E+07 | control-Rep I      |
| gii482955 | FBgn0002741 | 781.37  | 2341.09 | 2341.12 | -0.03 | 0 | 56  | 3.50E-05 | 1 | IEDMADMTVLNTPCVLHNLRL | 6.21E+06 | parkin null-Rep II |
| gii482955 | FBgn0002741 | 781.38  | 2341.13 | 2341.12 | 0     | 0 | 70  | 1.20E-06 | 1 | IEDMADMTVLNTPCVLHNLRL | 1.03E+07 | control-Rep II     |
| gii482955 | FBgn0002741 | 781.39  | 2341.14 | 2341.12 | 0.01  | 0 | 68  | 1.70E-06 | 1 | IEDMADMTVLNTPCVLHNLRL | 1.33E+07 | control-Rep I      |
| gii482955 | FBgn0002741 | 737.85  | 1473.69 | 1473.68 | 0     | 0 | 61  | 8.00E-06 | 1 | IEELEEVEAER           | 5.25E+07 | control-Rep I      |
| gii482955 | FBgn0002741 | 737.85  | 1473.68 | 1473.68 | -0.01 | 0 | 71  | 5.80E-07 | 1 | IEELEEVEAER           | 1.08E+08 | parkin null-Rep I  |
| gii482955 | FBgn0002741 | 737.85  | 1473.69 | 1473.68 | 0     | 0 | 71  | 7.20E-07 | 1 | IEELEEVEAER           | 1.18E+08 | parkin null-Rep II |
| gii482955 | FBgn0002741 | 737.85  | 1473.69 | 1473.68 | 0     | 0 | 76  | 2.20E-07 | 1 | IEELEEVEAER           | 1.25E+08 | control-Rep II     |

|           |             |        |         |         |       |   |    |          |   |                           |          |                    |
|-----------|-------------|--------|---------|---------|-------|---|----|----------|---|---------------------------|----------|--------------------|
| gii482955 | FBgn0002741 | 624.84 | 1247.67 | 1247.66 | 0     | 0 | 58 | 3.20E-05 | 1 | ISLTTQLEDTK               | 2.44E+06 | parkin null-Rep II |
| gii482955 | FBgn0002741 | 624.84 | 1247.67 | 1247.66 | 0     | 0 | 57 | 3.90E-05 | 1 | ISLTTQLEDTK               | 4.83E+06 | control-Rep II     |
| gii482955 | FBgn0002741 | 624.84 | 1247.67 | 1247.66 | 0     | 0 | 41 | 0.0014   | 1 | ISLTTQLEDTK               | 6.86E+06 | control-Rep I      |
| gii482955 | FBgn0002741 | 702.89 | 1403.76 | 1403.76 | 0     | 1 | 50 | 0.00012  | 1 | ISLTTQLEDTKR              | 3.94E+06 | parkin null-Rep II |
| gii482955 | FBgn0002741 | 702.88 | 1403.75 | 1403.76 | -0.01 | 1 | 46 | 0.00033  | 1 | ISLTTQLEDTKR              | 4.08E+06 | parkin null-Rep I  |
| gii482955 | FBgn0002741 | 702.89 | 1403.76 | 1403.76 | 0     | 1 | 54 | 5.80E-05 | 1 | ISLTTQLEDTKR              | 5.93E+06 | control-Rep II     |
| gii482955 | FBgn0002741 | 702.89 | 1403.76 | 1403.76 | 0     | 1 | 52 | 9.70E-05 | 1 | ISLTTQLEDTKR              | 7.49E+06 | control-Rep I      |
| gii482955 | FBgn0002741 | 424.89 | 1271.65 | 1271.65 | 0     | 1 | 23 | 0.087    | 1 | KGGGFATVSSAYK             | 5.28E+05 | control-Rep II     |
| gii482955 | FBgn0002741 | 424.89 | 1271.65 | 1271.65 | 0     | 1 | 26 | 0.047    | 1 | KGGGFATVSSAYK             | 7.31E+05 | control-Rep I      |
| gii482955 | FBgn0002741 | 722.07 | 2163.18 | 2163.15 | 0.03  | 2 | 39 | 0.0015   | 1 | KKLEADINELEIALDHANK       | 2.69E+06 | parkin null-Rep II |
| gii482955 | FBgn0002741 | 722.06 | 2163.16 | 2163.15 | 0.01  | 2 | 37 | 0.0028   | 1 | KKLEADINELEIALDHANK       | 4.22E+06 | control-Rep II     |
| gii482955 | FBgn0002741 | 679.36 | 2035.07 | 2035.06 | 0.01  | 1 | 71 | 1.10E-06 | 1 | KLEADINELEIALDHANK        | 7.40E+07 | parkin null-Rep II |
| gii482955 | FBgn0002741 | 679.36 | 2035.06 | 2035.06 | 0     | 1 | 77 | 3.10E-07 | 1 | KLEADINELEIALDHANK        | 8.95E+07 | control-Rep II     |
| gii482955 | FBgn0002741 | 679.36 | 2035.06 | 2035.06 | 0     | 1 | 71 | 1.30E-06 | 1 | KLEADINELEIALDHANK        | 1.02E+08 | control-Rep I      |
| gii482955 | FBgn0002741 | 679.36 | 2035.06 | 2035.06 | 0     | 1 | 70 | 1.50E-06 | 1 | KLEADINELEIALDHANK        | 1.07E+08 | parkin null-Rep I  |
| gii482955 | FBgn0002741 | 809.08 | 2424.23 | 2424.24 | -0.01 | 1 | 70 | 1.00E-06 | 1 | KLESELQTLHSDLDLLENEAK     | 6.33E+07 | control-Rep I      |
| gii482955 | FBgn0002741 | 809.09 | 2424.26 | 2424.24 | 0.02  | 1 | 71 | 9.80E-07 | 1 | KLESELQTLHSDLDLLENEAK     | 6.45E+07 | parkin null-Rep II |
| gii482955 | FBgn0002741 | 809.1  | 2424.26 | 2424.24 | 0.03  | 1 | 85 | 3.50E-08 | 1 | KLESELQTLHSDLDLLENEAK     | 6.77E+07 | control-Rep II     |
| gii482955 | FBgn0002741 | 809.09 | 2424.24 | 2424.24 | 0     | 1 | 64 | 4.60E-06 | 1 | KLESELQTLHSDLDLLENEAK     | 7.65E+07 | parkin null-Rep I  |
| gii482955 | FBgn0002741 | 787.9  | 1573.79 | 1573.78 | 0.01  | 0 | 74 | 6.20E-07 | 1 | LAEAEETIESLNQK            | 3.58E+07 | parkin null-Rep II |
| gii482955 | FBgn0002741 | 787.9  | 1573.79 | 1573.78 | 0     | 0 | 80 | 1.40E-07 | 1 | LAEAEETIESLNQK            | 4.27E+07 | control-Rep II     |
| gii482955 | FBgn0002741 | 787.9  | 1573.79 | 1573.78 | 0.01  | 0 | 62 | 1.10E-05 | 1 | LAEAEETIESLNQK            | 4.46E+07 | parkin null-Rep I  |
| gii482955 | FBgn0002741 | 787.9  | 1573.79 | 1573.78 | 0     | 0 | 74 | 5.10E-07 | 1 | LAEAEETIESLNQK            | 5.74E+07 | control-Rep I      |
| gii482955 | FBgn0002741 | 718.39 | 1434.77 | 1434.76 | 0     | 0 | 62 | 1.90E-05 | 1 | LAGADIETYLLEK             | 6.10E+06 | control-Rep II     |
| gii482955 | FBgn0002741 | 718.39 | 1434.77 | 1434.76 | 0     | 0 | 76 | 7.10E-07 | 1 | LAGADIETYLLEK             | 9.92E+06 | parkin null-Rep I  |
| gii482955 | FBgn0002741 | 718.39 | 1434.77 | 1434.76 | 0.01  | 0 | 75 | 4.30E-07 | 1 | LAGADIETYLLEK             | 1.09E+07 | parkin null-Rep II |
| gii482955 | FBgn0002741 | 718.39 | 1434.77 | 1434.76 | 0.01  | 0 | 79 | 2.00E-07 | 1 | LAGADIETYLLEK             | 1.24E+07 | control-Rep I      |
| gii482955 | FBgn0002741 | 537.28 | 1072.55 | 1072.54 | 0.01  | 0 | 38 | 0.0063   | 1 | LDEAEANALK                | 2.46E+05 | control-Rep I      |
| gii482955 | FBgn0002741 | 537.28 | 1072.55 | 1072.54 | 0.01  | 0 | 42 | 0.0022   | 1 | LDEAEANALK                | 4.87E+05 | control-Rep II     |
| gii482955 | FBgn0002741 | 537.28 | 1072.55 | 1072.54 | 0.01  | 0 | 46 | 0.00082  | 1 | LDEAEANALK                | 5.48E+05 | parkin null-Rep II |
| gii482955 | FBgn0002741 | 537.28 | 1072.55 | 1072.54 | 0.01  | 0 | 46 | 0.00096  | 1 | LDEAEANALK                | 5.49E+05 | parkin null-Rep I  |
| gii482955 | FBgn0002741 | 636.66 | 1906.96 | 1906.96 | -0.01 | 0 | 23 | 0.07     | 1 | LEADINELEIALDHANK         | 5.16E+06 | parkin null-Rep II |
| gii482955 | FBgn0002741 | 636.67 | 1906.98 | 1906.96 | 0.01  | 0 | 27 | 0.03     | 1 | LEADINELEIALDHANK         | 5.56E+06 | parkin null-Rep I  |
| gii482955 | FBgn0002741 | 636.66 | 1906.96 | 1906.96 | -0.01 | 0 | 22 | 0.089    | 1 | LEADINELEIALDHANK         | 6.91E+06 | control-Rep II     |
| gii482955 | FBgn0002741 | 934.12 | 2799.34 | 2799.33 | 0.01  | 1 | 48 | 0.00014  | 1 | LEAEKDELQAALAEAEAALEQEENK | 6.84E+06 | control-Rep I      |
| gii482955 | FBgn0002741 | 934.13 | 2799.35 | 2799.33 | 0.02  | 1 | 79 | 1.30E-07 | 1 | LEAEKDELQAALAEAEAALEQEENK | 2.51E+07 | parkin null-Rep I  |
| gii482955 | FBgn0002741 | 934.13 | 2799.36 | 2799.33 | 0.03  | 1 | 72 | 6.70E-07 | 1 | LEAEKDELQAALAEAEAALEQEENK | 3.46E+07 | parkin null-Rep II |
| gii482955 | FBgn0002741 | 934.13 | 2799.36 | 2799.33 | 0.03  | 1 | 77 | 2.30E-07 | 1 | LEAEKDELQAALAEAEAALEQEENK | 4.71E+07 | control-Rep II     |
| gii482955 | FBgn0002741 | 586.33 | 1170.65 | 1170.65 | 0     | 0 | 58 | 3.40E-05 | 1 | LEDEQVVVLK                | 2.34E+07 | parkin null-Rep II |

|           |             |        |         |         |       |   |    |          |   |                             |          |                    |
|-----------|-------------|--------|---------|---------|-------|---|----|----------|---|-----------------------------|----------|--------------------|
| gil482955 | FBgn0002741 | 586.33 | 1170.65 | 1170.65 | 0     | 0 | 53 | 0.00011  | 1 | LEDEQVVVLK                  | 3.52E+07 | control-Rep II     |
| gil482955 | FBgn0002741 | 586.33 | 1170.65 | 1170.65 | 0     | 0 | 54 | 7.10E-05 | 1 | LEDEQVVVLK                  | 3.57E+07 | parkin null-Rep I  |
| gil482955 | FBgn0002741 | 586.33 | 1170.65 | 1170.65 | 0     | 0 | 52 | 9.90E-05 | 1 | LEDEQVVVLK                  | 4.91E+07 | control-Rep I      |
| gil482955 | FBgn0002741 | 815.92 | 1629.82 | 1629.82 | 0     | 0 | 84 | 7.10E-08 | 1 | LEEAGGATSAQIELNK            | 4.01E+07 | parkin null-Rep I  |
| gil482955 | FBgn0002741 | 815.92 | 1629.83 | 1629.82 | 0.01  | 0 | 83 | 8.90E-08 | 1 | LEEAGGATSAQIELNK            | 4.22E+07 | parkin null-Rep II |
| gil482955 | FBgn0002741 | 815.92 | 1629.82 | 1629.82 | 0     | 0 | 81 | 1.60E-07 | 1 | LEEAGGATSAQIELNK            | 4.57E+07 | control-Rep II     |
| gil482955 | FBgn0002741 | 815.92 | 1629.82 | 1629.82 | 0     | 0 | 90 | 1.70E-08 | 1 | LEEAGGATSAQIELNK            | 4.77E+07 | control-Rep I      |
| gil482955 | FBgn0002741 | 845.41 | 1688.81 | 1688.81 | 0     | 0 | 53 | 9.20E-05 | 1 | LEQTLDELEDSLK               | 1.16E+07 | control-Rep I      |
| gil482955 | FBgn0002741 | 845.41 | 1688.8  | 1688.81 | -0.01 | 0 | 54 | 4.50E-05 | 1 | LEQTLDELEDSLK               | 1.76E+07 | parkin null-Rep II |
| gil482955 | FBgn0002741 | 845.41 | 1688.81 | 1688.81 | 0     | 0 | 44 | 0.00043  | 1 | LEQTLDELEDSLK               | 1.89E+07 | parkin null-Rep I  |
| gil482955 | FBgn0002741 | 845.42 | 1688.82 | 1688.81 | 0.01  | 0 | 75 | 3.90E-07 | 1 | LEQTLDELEDSLK               | 2.05E+07 | control-Rep II     |
| gil482955 | FBgn0002741 | 766.39 | 2296.16 | 2296.14 | 0.01  | 0 | 58 | 2.10E-05 | 1 | LESELQTLHSDLDLLEAK          | 7.19E+06 | control-Rep I      |
| gil482955 | FBgn0002741 | 766.39 | 2296.16 | 2296.14 | 0.01  | 0 | 61 | 1.10E-05 | 1 | LESELQTLHSDLDLLEAK          | 9.26E+06 | control-Rep II     |
| gil482955 | FBgn0002741 | 808.43 | 1614.85 | 1614.85 | 0     | 1 | 88 | 2.40E-08 | 1 | LKVDDLAELDASQK              | 4.94E+07 | parkin null-Rep II |
| gil482955 | FBgn0002741 | 808.43 | 1614.85 | 1614.85 | 0     | 1 | 91 | 1.30E-08 | 1 | LKVDDLAELDASQK              | 5.89E+07 | control-Rep II     |
| gil482955 | FBgn0002741 | 808.43 | 1614.85 | 1614.85 | 0.01  | 1 | 99 | 2.40E-09 | 1 | LKVDDLAELDASQK              | 6.01E+07 | parkin null-Rep I  |
| gil482955 | FBgn0002741 | 808.43 | 1614.85 | 1614.85 | 0     | 1 | 94 | 6.80E-09 | 1 | LKVDDLAELDASQK              | 7.06E+07 | control-Rep I      |
| gil482955 | FBgn0002741 | 580.32 | 1158.63 | 1158.62 | 0     | 0 | 54 | 0.00012  | 1 | LSIENS DLLR                 | 1.14E+07 | parkin null-Rep II |
| gil482955 | FBgn0002741 | 580.32 | 1158.63 | 1158.62 | 0     | 0 | 68 | 5.00E-06 | 1 | LSIENS DLLR                 | 1.40E+07 | parkin null-Rep I  |
| gil482955 | FBgn0002741 | 580.32 | 1158.63 | 1158.62 | 0     | 0 | 72 | 2.00E-06 | 1 | LSIENS DLLR                 | 1.49E+07 | control-Rep I      |
| gil482955 | FBgn0002741 | 580.32 | 1158.63 | 1158.62 | 0     | 0 | 67 | 6.60E-06 | 1 | LSIENS DLLR                 | 1.57E+07 | control-Rep II     |
| gil482955 | FBgn0002741 | 823.42 | 1644.83 | 1644.82 | 0     | 0 | 36 | 0.0065   | 1 | LSTEVEDLQLEVDR              | 1.56E+06 | control-Rep II     |
| gil482955 | FBgn0002741 | 823.42 | 1644.83 | 1644.82 | 0     | 0 | 44 | 0.0011   | 1 | LSTEVEDLQLEVDR              | 3.80E+06 | parkin null-Rep II |
| gil482955 | FBgn0002741 | 823.42 | 1644.83 | 1644.82 | 0     | 0 | 62 | 1.90E-05 | 1 | LSTEVEDLQLEVDR              | 3.93E+06 | control-Rep I      |
| gil482955 | FBgn0002741 | 622.83 | 1243.64 | 1243.64 | 0     | 0 | 64 | 6.60E-06 | 1 | LTQEAVADLER                 | 3.28E+07 | parkin null-Rep II |
| gil482955 | FBgn0002741 | 622.83 | 1243.64 | 1243.64 | 0     | 0 | 72 | 9.60E-07 | 1 | LTQEAVADLER                 | 4.63E+07 | parkin null-Rep I  |
| gil482955 | FBgn0002741 | 622.83 | 1243.64 | 1243.64 | 0     | 0 | 72 | 1.20E-06 | 1 | LTQEAVADLER                 | 5.10E+07 | control-Rep II     |
| gil482955 | FBgn0002741 | 622.83 | 1243.64 | 1243.64 | 0     | 0 | 57 | 3.30E-05 | 1 | LTQEAVADLER                 | 5.93E+07 | control-Rep I      |
| gil482955 | FBgn0002741 | 648    | 1940.98 | 1940.98 | 0     | 1 | 50 | 0.00016  | 1 | NLADEVKDLLDQIGEGGR          | 3.71E+06 | control-Rep I      |
| gil482955 | FBgn0002741 | 648    | 1940.98 | 1940.98 | 0     | 1 | 48 | 0.0002   | 1 | NLADEVKDLLDQIGEGGR          | 4.52E+06 | parkin null-Rep I  |
| gil482955 | FBgn0002741 | 648.01 | 1941    | 1940.98 | 0.02  | 1 | 57 | 3.00E-05 | 1 | NLADEVKDLLDQIGEGGR          | 5.04E+06 | parkin null-Rep II |
| gil482955 | FBgn0002741 | 648.01 | 1940.99 | 1940.98 | 0.01  | 1 | 42 | 0.00091  | 1 | NLADEVKDLLDQIGEGGR          | 7.14E+06 | control-Rep II     |
| gil482955 | FBgn0002741 | 951.46 | 2851.36 | 2851.36 | 0     | 0 | 80 | 8.60E-08 | 1 | QAEQELADAHEQLNEVSAQNASISAAK | 7.23E+07 | parkin null-Rep I  |
| gil482955 | FBgn0002741 | 951.46 | 2851.36 | 2851.36 | 0     | 0 | 71 | 6.00E-07 | 1 | QAEQELADAHEQLNEVSAQNASISAAK | 8.84E+07 | parkin null-Rep II |
| gil482955 | FBgn0002741 | 951.46 | 2851.36 | 2851.36 | 0     | 0 | 67 | 1.70E-06 | 1 | QAEQELADAHEQLNEVSAQNASISAAK | 9.30E+07 | control-Rep II     |
| gil482955 | FBgn0002741 | 951.46 | 2851.36 | 2851.36 | 0     | 0 | 71 | 7.10E-07 | 1 | QAEQELADAHEQLNEVSAQNASISAAK | 1.01E+08 | control-Rep I      |
| gil482955 | FBgn0002741 | 821.45 | 1640.89 | 1640.86 | 0.02  | 0 | 44 | 0.00069  | 1 | QIEEAEIIAALNLAK             | 3.37E+06 | parkin null-Rep II |
| gil482955 | FBgn0002741 | 821.45 | 1640.89 | 1640.86 | 0.02  | 0 | 61 | 1.60E-05 | 1 | QIEEAEIIAALNLAK             | 8.13E+06 | control-Rep I      |
| gil482955 | FBgn0002741 | 788.39 | 1574.77 | 1574.78 | -0.01 | 0 | 86 | 5.80E-08 | 1 | QLEEAESQVSQLSK              | 5.85E+06 | control-Rep II     |

|             |             |         |         |         |       |   |     |          |   |                              |          |                    |
|-------------|-------------|---------|---------|---------|-------|---|-----|----------|---|------------------------------|----------|--------------------|
| gii482955   | FBgn0002741 | 788.39  | 1574.77 | 1574.78 | -0.01 | 0 | 100 | 2.60E-09 | 1 | QLEEAESQVSQLSK               | 8.54E+06 | control-Rep I      |
| gii482955   | FBgn0002741 | 986.16  | 2955.46 | 2955.43 | 0.03  | 2 | 87  | 2.30E-08 | 1 | RLEAEKDELQAALEEEAAALEQEENK   | 3.20E+06 | control-Rep I      |
| gii482955   | FBgn0002741 | 986.16  | 2955.45 | 2955.43 | 0.02  | 2 | 97  | 2.20E-09 | 1 | RLEAEKDELQAALEEEAAALEQEENK   | 1.66E+07 | parkin null-Rep II |
| gii482955   | FBgn0002741 | 986.16  | 2955.46 | 2955.43 | 0.03  | 2 | 97  | 2.30E-09 | 1 | RLEAEKDELQAALEEEAAALEQEENK   | 2.04E+07 | control-Rep II     |
| gii482955   | FBgn0002741 | 1003.49 | 3007.44 | 3007.46 | -0.02 | 1 | 78  | 1.70E-07 | 1 | RQAEQELADAHEQLNEVSAQNASISAAK | 2.04E+07 | parkin null-Rep II |
| gii482955   | FBgn0002741 | 1003.49 | 3007.45 | 3007.46 | 0     | 1 | 84  | 4.00E-08 | 1 | RQAEQELADAHEQLNEVSAQNASISAAK | 2.40E+07 | parkin null-Rep I  |
| gii482955   | FBgn0002741 | 1003.49 | 3007.46 | 3007.46 | 0     | 1 | 69  | 1.50E-06 | 1 | RQAEQELADAHEQLNEVSAQNASISAAK | 2.63E+07 | control-Rep I      |
| gii482955   | FBgn0002741 | 811.09  | 2430.26 | 2430.24 | 0.02  | 1 | 53  | 5.50E-05 | 1 | SKGSLEDQVVQTNPVLEAFGNAK      | 1.20E+07 | parkin null-Rep II |
| gii482955   | FBgn0002741 | 811.09  | 2430.26 | 2430.24 | 0.02  | 1 | 65  | 3.70E-06 | 1 | SKGSLEDQVVQTNPVLEAFGNAK      | 1.37E+07 | control-Rep II     |
| gii482955   | FBgn0002741 | 811.09  | 2430.25 | 2430.24 | 0.01  | 1 | 63  | 4.90E-06 | 1 | SKGSLEDQVVQTNPVLEAFGNAK      | 1.96E+07 | control-Rep I      |
| gii482955   | FBgn0002741 | 637.33  | 1908.96 | 1908.95 | 0     | 1 | 62  | 1.00E-05 | 1 | TGEELQAAEDKINHLNK            | 6.10E+06 | parkin null-Rep II |
| gii482955   | FBgn0002741 | 637.32  | 1908.94 | 1908.95 | -0.02 | 1 | 51  | 0.00024  | 1 | TGEELQAAEDKINHLNK            | 6.85E+06 | parkin null-Rep I  |
| gii482955   | FBgn0002741 | 637.33  | 1908.96 | 1908.95 | 0.01  | 1 | 48  | 0.00023  | 1 | TGEELQAAEDKINHLNK            | 7.29E+06 | control-Rep II     |
| gii482955   | FBgn0002741 | 687.84  | 1373.67 | 1373.67 | 0     | 0 | 77  | 2.70E-07 | 1 | VDDLAAELDASQK                | 2.75E+07 | parkin null-Rep II |
| gii482955   | FBgn0002741 | 687.84  | 1373.67 | 1373.67 | 0     | 0 | 87  | 2.90E-08 | 1 | VDDLAAELDASQK                | 3.12E+07 | parkin null-Rep I  |
| gii482955   | FBgn0002741 | 687.84  | 1373.67 | 1373.67 | 0     | 0 | 71  | 1.10E-06 | 1 | VDDLAAELDASQK                | 3.17E+07 | control-Rep II     |
| gii482955   | FBgn0002741 | 687.84  | 1373.67 | 1373.67 | 0     | 0 | 63  | 6.80E-06 | 1 | VDDLAAELDASQK                | 3.46E+07 | control-Rep I      |
| gii482955   | FBgn0002741 | 530.29  | 1058.57 | 1058.57 | -0.01 | 0 | 44  | 0.0018   | 1 | VISQQSLER                    | 8.46E+05 | control-Rep II     |
| gii482955   | FBgn0002741 | 530.29  | 1058.57 | 1058.57 | -0.01 | 0 | 29  | 0.049    | 1 | VISQQSLER                    | 1.10E+06 | parkin null-Rep I  |
| gii482955   | FBgn0002741 | 530.29  | 1058.57 | 1058.57 | -0.01 | 0 | 40  | 0.004    | 1 | VISQQSLER                    | 1.43E+06 | control-Rep I      |
| gii482955   | FBgn0002741 | 847.92  | 1693.82 | 1693.82 | 0.01  | 0 | 82  | 8.00E-08 | 1 | VLIESTELNDDQYR               | 1.65E+07 | control-Rep II     |
| gii482955   | FBgn0002741 | 847.91  | 1693.81 | 1693.82 | 0     | 0 | 69  | 1.60E-06 | 1 | VLIESTELNDDQYR               | 1.92E+07 | parkin null-Rep II |
| gii482955   | FBgn0002741 | 847.92  | 1693.83 | 1693.82 | 0.02  | 0 | 49  | 0.00015  | 1 | VLIESTELNDDQYR               | 2.09E+07 | control-Rep I      |
| gii482955   | FBgn0002741 | 849.96  | 1697.91 | 1697.9  | 0.01  | 0 | 54  | 5.90E-05 | 1 | YQILNPAGIVGVDDPK             | 1.34E+07 | parkin null-Rep I  |
| gii482955   | FBgn0002741 | 849.96  | 1697.91 | 1697.9  | 0.01  | 0 | 55  | 4.30E-05 | 1 | YQILNPAGIVGVDDPK             | 1.41E+07 | parkin null-Rep II |
| gii482955   | FBgn0002741 | 849.96  | 1697.91 | 1697.9  | 0.01  | 0 | 51  | 0.00012  | 1 | YQILNPAGIVGVDDPK             | 1.84E+07 | control-Rep I      |
| gii482955   | FBgn0002741 | 849.96  | 1697.9  | 1697.9  | 0     | 0 | 65  | 4.50E-06 | 1 | YQILNPAGIVGVDDPK             | 2.00E+07 | control-Rep II     |
| gii482955   | FBgn0002741 | 609.67  | 1826    | 1825.99 | 0     | 1 | 35  | 0.003    | 1 | YQILNPAGIVGVDDPKK            | 9.93E+06 | parkin null-Rep II |
| gii482955   | FBgn0002741 | 609.67  | 1826    | 1825.99 | 0.01  | 1 | 43  | 0.00052  | 1 | YQILNPAGIVGVDDPKK            | 1.18E+07 | control-Rep II     |
| gii482955   | FBgn0002741 | 609.68  | 1826.01 | 1825.99 | 0.01  | 1 | 34  | 0.0034   | 1 | YQILNPAGIVGVDDPKK            | 1.34E+07 | parkin null-Rep I  |
| gii482955   | FBgn0002741 | 609.67  | 1825.99 | 1825.99 | 0     | 1 | 40  | 0.0011   | 1 | YQILNPAGIVGVDDPKK            | 1.77E+07 | control-Rep I      |
| gii17136340 | FBgn0002772 | 705.42  | 1408.83 | 1408.83 | 0.01  | 0 | 49  | 6.10E-05 | 1 | ALNLNPTLALIEK                | 1.89E+08 | control-Rep II     |
| gii17136340 | FBgn0002772 | 705.42  | 1408.84 | 1408.83 | 0.01  | 0 | 50  | 4.90E-05 | 1 | ALNLNPTLALIEK                | 1.98E+08 | parkin null-Rep II |
| gii17136340 | FBgn0002772 | 705.42  | 1408.83 | 1408.83 | 0     | 0 | 53  | 2.10E-05 | 1 | ALNLNPTLALIEK                | 2.01E+08 | parkin null-Rep I  |
| gii17136340 | FBgn0002772 | 705.42  | 1408.83 | 1408.83 | 0     | 0 | 47  | 7.00E-05 | 1 | ALNLNPTLALIEK                | 2.29E+08 | control-Rep I      |
| gii17136340 | FBgn0002772 | 845.86  | 1689.71 | 1689.7  | 0     | 0 | 32  | 0.001    | 1 | EQGCYEDFIECLK                | 8.06E+06 | control-Rep II     |
| gii17136340 | FBgn0002772 | 845.86  | 1689.71 | 1689.7  | 0     | 0 | 37  | 0.00029  | 1 | EQGCYEDFIECLK                | 8.30E+06 | parkin null-Rep II |
| gii17136340 | FBgn0002772 | 845.86  | 1689.71 | 1689.7  | 0     | 0 | 26  | 0.0042   | 1 | EQGCYEDFIECLK                | 8.33E+06 | control-Rep I      |
| gii17136340 | FBgn0002772 | 726.4   | 1450.78 | 1450.77 | 0.01  | 0 | 67  | 2.80E-06 | 1 | LDEFLLPIYSQVK                | 7.57E+07 | control-Rep II     |



|             |             |         |         |         |       |   |     |          |   |                                       |          |                    |
|-------------|-------------|---------|---------|---------|-------|---|-----|----------|---|---------------------------------------|----------|--------------------|
| gij17136340 | FBgn0002772 | 726.4   | 1450.78 | 1450.77 | 0.01  | 0 | 58  | 2.70E-05 | 1 | LDEFLPIYSQVK                          | 8.09E+07 | parkin null-Rep II |
| gij17136340 | FBgn0002772 | 726.4   | 1450.78 | 1450.77 | 0.01  | 0 | 62  | 8.90E-06 | 1 | LDEFLPIYSQVK                          | 8.17E+07 | parkin null-Rep I  |
| gij17136340 | FBgn0002772 | 726.4   | 1450.78 | 1450.77 | 0.01  | 0 | 57  | 3.40E-05 | 1 | LDEFLPIYSQVK                          | 9.44E+07 | control-Rep I      |
| gij17933672 | FBgn0002773 | 875.94  | 1749.86 | 1749.86 | 0     | 1 | 71  | 1.10E-06 | 1 | EAFQLMDADKDGHIK                       | 3.70E+07 | control-Rep II     |
| gij17933672 | FBgn0002773 | 584.3   | 1749.87 | 1749.86 | 0     | 1 | 28  | 0.023    | 1 | EAFQLMDADKDGHIK                       | 3.87E+07 | parkin null-Rep II |
| gij17933672 | FBgn0002773 | 875.94  | 1749.86 | 1749.86 | 0     | 1 | 80  | 1.40E-07 | 1 | EAFQLMDADKDGHIK                       | 4.03E+07 | parkin null-Rep I  |
| gij17933672 | FBgn0002773 | 875.93  | 1749.85 | 1749.86 | -0.01 | 1 | 68  | 2.00E-06 | 1 | EAFQLMDADKDGHIK                       | 4.38E+07 | control-Rep I      |
| gij17933672 | FBgn0002773 | 934.43  | 1866.85 | 1866.87 | -0.01 | 0 | 115 | 2.30E-11 | 1 | MATSGANDEDEVVIAAFK                    | 3.01E+07 | control-Rep II     |
| gij17933672 | FBgn0002773 | 934.44  | 1866.88 | 1866.87 | 0.01  | 0 | 99  | 1.10E-09 | 1 | MATSGANDEDEVVIAAFK                    | 3.83E+07 | parkin null-Rep I  |
| gij17933672 | FBgn0002773 | 934.44  | 1866.87 | 1866.87 | 0     | 0 | 108 | 1.20E-10 | 1 | MATSGANDEDEVVIAAFK                    | 4.14E+07 | parkin null-Rep II |
| gij17933672 | FBgn0002773 | 934.45  | 1866.88 | 1866.87 | 0.01  | 0 | 110 | 8.20E-11 | 1 | MATSGANDEDEVVIAAFK                    | 4.31E+07 | control-Rep I      |
| gij17933672 | FBgn0002773 | 1125.19 | 3372.56 | 3372.58 | -0.02 | 1 | 72  | 3.30E-07 | 1 | TKEEGGTSETASEAASEAATPAPAATPAPAASATGSK | 2.03E+07 | control-Rep I      |
| gij17933672 | FBgn0002773 | 1125.2  | 3372.58 | 3372.58 | 0     | 1 | 76  | 1.50E-07 | 1 | TKEEGGTSETASEAASEAATPAPAATPAPAASATGSK | 2.32E+07 | control-Rep II     |
| gij17933672 | FBgn0002773 | 1125.2  | 3372.58 | 3372.58 | 0     | 1 | 74  | 2.40E-07 | 1 | TKEEGGTSETASEAASEAATPAPAATPAPAASATGSK | 2.66E+07 | parkin null-Rep II |
| gij8230     | FBgn0002789 | 672.36  | 1342.71 | 1342.72 | -0.01 | 0 | 61  | 2.30E-05 | 1 | AGQTIIVGLQAGSNK                       | 2.02E+06 | parkin null-Rep I  |
| gij8230     | FBgn0002789 | 672.37  | 1342.72 | 1342.72 | 0     | 0 | 68  | 2.50E-06 | 1 | AGQTIIVGLQAGSNK                       | 2.28E+06 | parkin null-Rep II |
| gij8230     | FBgn0002789 | 672.37  | 1342.72 | 1342.72 | 0     | 0 | 77  | 3.80E-07 | 1 | AGQTIIVGLQAGSNK                       | 2.81E+06 | control-Rep II     |
| gij8230     | FBgn0002789 | 672.37  | 1342.73 | 1342.72 | 0.01  | 0 | 60  | 3.40E-05 | 1 | AGQTIIVGLQAGSNK                       | 4.25E+06 | control-Rep I      |
| gij8230     | FBgn0002789 | 800.74  | 2399.2  | 2399.18 | 0.02  | 2 | 78  | 2.10E-07 | 1 | RNPEMDKEAQEWIEAIAEK                   | 4.10E+05 | parkin null-Rep I  |
| gij8230     | FBgn0002789 | 800.74  | 2399.2  | 2399.18 | 0.02  | 2 | 53  | 6.90E-05 | 1 | RNPEMDKEAQEWIEAIAEK                   | 2.50E+06 | control-Rep I      |
| gij2944333  | FBgn0002921 | 695.35  | 1388.69 | 1388.68 | 0.01  | 0 | 67  | 3.60E-06 | 1 | DVSSDQLDEILR                          | 2.36E+07 | parkin null-Rep II |
| gij2944333  | FBgn0002921 | 695.35  | 1388.68 | 1388.68 | 0     | 0 | 59  | 1.60E-05 | 1 | DVSSDQLDEILR                          | 2.75E+07 | control-Rep II     |
| gij2944333  | FBgn0002921 | 695.35  | 1388.69 | 1388.68 | 0.01  | 0 | 30  | 0.032    | 1 | DVSSDQLDEILR                          | 2.81E+07 | parkin null-Rep I  |
| gij2944333  | FBgn0002921 | 695.34  | 1388.67 | 1388.68 | -0.01 | 0 | 61  | 7.80E-06 | 1 | DVSSDQLDEILR                          | 2.96E+07 | control-Rep I      |
| gij2944333  | FBgn0002921 | 885.92  | 1769.82 | 1769.8  | 0.01  | 0 | 80  | 7.30E-08 | 1 | EAFNNAYMELGGLGER                      | 4.65E+07 | parkin null-Rep II |
| gij2944333  | FBgn0002921 | 885.91  | 1769.81 | 1769.8  | 0.01  | 0 | 85  | 2.20E-08 | 1 | EAFNNAYMELGGLGER                      | 5.18E+07 | control-Rep II     |
| gij2944333  | FBgn0002921 | 885.91  | 1769.81 | 1769.8  | 0     | 0 | 85  | 2.10E-08 | 1 | EAFNNAYMELGGLGER                      | 5.68E+07 | control-Rep I      |
| gij2944333  | FBgn0002921 | 885.91  | 1769.81 | 1769.8  | 0.01  | 0 | 74  | 2.90E-07 | 1 | EAFNNAYMELGGLGER                      | 5.82E+07 | parkin null-Rep I  |
| gij2944333  | FBgn0002921 | 657.99  | 1970.95 | 1970.96 | -0.01 | 1 | 44  | 0.00036  | 1 | ENLDDLKQELDIDFHK                      | 1.23E+07 | control-Rep II     |
| gij2944333  | FBgn0002921 | 657.99  | 1970.95 | 1970.96 | -0.01 | 1 | 37  | 0.002    | 1 | ENLDDLKQELDIDFHK                      | 1.51E+07 | parkin null-Rep II |
| gij2944333  | FBgn0002921 | 658     | 1970.98 | 1970.96 | 0.02  | 1 | 21  | 0.098    | 1 | ENLDDLKQELDIDFHK                      | 1.66E+07 | control-Rep I      |
| gij2944333  | FBgn0002921 | 657.99  | 1970.95 | 1970.96 | -0.01 | 1 | 31  | 0.0075   | 1 | ENLDDLKQELDIDFHK                      | 2.12E+07 | parkin null-Rep I  |
| gij2944333  | FBgn0002921 | 645.33  | 1288.65 | 1288.65 | -0.01 | 0 | 53  | 0.00014  | 1 | EVSGDASEAALLK                         | 2.59E+07 | parkin null-Rep II |
| gij2944333  | FBgn0002921 | 645.34  | 1288.66 | 1288.65 | 0.01  | 0 | 54  | 6.80E-05 | 1 | EVSGDASEAALLK                         | 3.71E+07 | parkin null-Rep I  |
| gij2944333  | FBgn0002921 | 645.33  | 1288.65 | 1288.65 | 0     | 0 | 57  | 3.30E-05 | 1 | EVSGDASEAALLK                         | 3.71E+07 | control-Rep II     |
| gij2944333  | FBgn0002921 | 645.33  | 1288.65 | 1288.65 | 0     | 0 | 54  | 7.40E-05 | 1 | EVSGDASEAALLK                         | 3.98E+07 | control-Rep I      |
| gij2944333  | FBgn0002921 | 847.42  | 1692.82 | 1692.81 | 0.01  | 0 | 72  | 6.30E-07 | 1 | FNTDDINFPIDNLR                        | 6.11E+07 | parkin null-Rep II |
| gij2944333  | FBgn0002921 | 847.42  | 1692.82 | 1692.81 | 0.01  | 0 | 77  | 1.90E-07 | 1 | FNTDDINFPIDNLR                        | 7.39E+07 | control-Rep II     |
| gij2944333  | FBgn0002921 | 847.42  | 1692.82 | 1692.81 | 0.01  | 0 | 97  | 2.30E-09 | 1 | FNTDDINFPIDNLR                        | 7.44E+07 | parkin null-Rep I  |

|            |             |        |         |         |       |   |     |          |   |                     |          |                    |
|------------|-------------|--------|---------|---------|-------|---|-----|----------|---|---------------------|----------|--------------------|
| gil2944333 | FBgn0002921 | 847.41 | 1692.81 | 1692.81 | 0     | 0 | 92  | 5.80E-09 | 1 | FNTDDINFPIDNLR      | 7.63E+07 | control-Rep I      |
| gil2944333 | FBgn0002921 | 681.85 | 1361.68 | 1361.68 | 0     | 0 | 64  | 5.90E-06 | 1 | FVGLMSMIDPPR        | 3.53E+07 | parkin null-Rep II |
| gil2944333 | FBgn0002921 | 681.85 | 1361.69 | 1361.68 | 0.01  | 0 | 66  | 4.10E-06 | 1 | FVGLMSMIDPPR        | 4.76E+07 | parkin null-Rep I  |
| gil2944333 | FBgn0002921 | 681.85 | 1361.69 | 1361.68 | 0     | 0 | 68  | 2.60E-06 | 1 | FVGLMSMIDPPR        | 4.79E+07 | control-Rep II     |
| gil2944333 | FBgn0002921 | 681.85 | 1361.69 | 1361.68 | 0     | 0 | 54  | 5.80E-05 | 1 | FVGLMSMIDPPR        | 5.98E+07 | control-Rep I      |
| gil2944333 | FBgn0002921 | 744.37 | 1486.72 | 1486.7  | 0.02  | 0 | 67  | 2.60E-06 | 1 | GVVISCGDHTVMGR      | 2.57E+06 | parkin null-Rep II |
| gil2944333 | FBgn0002921 | 744.35 | 1486.7  | 1486.7  | -0.01 | 0 | 69  | 1.00E-06 | 1 | GVVISCGDHTVMGR      | 3.92E+06 | control-Rep I      |
| gil2944333 | FBgn0002921 | 744.36 | 1486.71 | 1486.7  | 0.01  | 0 | 71  | 8.70E-07 | 1 | GVVISCGDHTVMGR      | 4.96E+06 | control-Rep II     |
| gil2944333 | FBgn0002921 | 744.35 | 1486.69 | 1486.7  | -0.01 | 0 | 86  | 2.30E-08 | 1 | GVVISCGDHTVMGR      | 5.40E+06 | parkin null-Rep I  |
| gil2944333 | FBgn0002921 | 807.44 | 1612.87 | 1612.87 | 0     | 0 | 57  | 3.40E-05 | 1 | IAGLASGLDTGETPIAK   | 2.79E+07 | parkin null-Rep I  |
| gil2944333 | FBgn0002921 | 807.44 | 1612.87 | 1612.87 | 0     | 0 | 55  | 5.20E-05 | 1 | IAGLASGLDTGETPIAK   | 2.95E+07 | parkin null-Rep II |
| gil2944333 | FBgn0002921 | 807.44 | 1612.87 | 1612.87 | 0.01  | 0 | 76  | 3.80E-07 | 1 | IAGLASGLDTGETPIAK   | 3.39E+07 | control-Rep II     |
| gil2944333 | FBgn0002921 | 807.44 | 1612.87 | 1612.87 | 0     | 0 | 63  | 8.50E-06 | 1 | IAGLASGLDTGETPIAK   | 3.48E+07 | control-Rep I      |
| gil2944333 | FBgn0002921 | 809.93 | 1617.85 | 1617.84 | 0.01  | 1 | 106 | 3.90E-10 | 1 | KADIGVAMGIAGSDVSK   | 1.85E+07 | parkin null-Rep II |
| gil2944333 | FBgn0002921 | 809.93 | 1617.84 | 1617.84 | 0     | 1 | 99  | 2.00E-09 | 1 | KADIGVAMGIAGSDVSK   | 2.55E+07 | control-Rep II     |
| gil2944333 | FBgn0002921 | 809.93 | 1617.84 | 1617.84 | 0     | 1 | 106 | 3.60E-10 | 1 | KADIGVAMGIAGSDVSK   | 2.69E+07 | parkin null-Rep I  |
| gil2944333 | FBgn0002921 | 809.93 | 1617.84 | 1617.84 | 0     | 1 | 108 | 2.40E-10 | 1 | KADIGVAMGIAGSDVSK   | 2.70E+07 | control-Rep I      |
| gil2944333 | FBgn0002921 | 544.3  | 1086.59 | 1086.59 | 0     | 0 | 23  | 0.17     | 1 | LIIVEGCQR           | 7.33E+06 | parkin null-Rep I  |
| gil2944333 | FBgn0002921 | 544.3  | 1086.58 | 1086.59 | 0     | 0 | 37  | 0.004    | 1 | LIIVEGCQR           | 7.75E+06 | control-Rep II     |
| gil2944333 | FBgn0002921 | 907.97 | 1813.92 | 1813.92 | -0.01 | 0 | 93  | 6.50E-09 | 1 | MGAIVAVTGDGVNDSPALK | 2.98E+07 | control-Rep I      |
| gil2944333 | FBgn0002921 | 907.97 | 1813.93 | 1813.92 | 0.01  | 0 | 96  | 3.70E-09 | 1 | MGAIVAVTGDGVNDSPALK | 3.20E+07 | parkin null-Rep II |
| gil2944333 | FBgn0002921 | 907.97 | 1813.93 | 1813.92 | 0     | 0 | 114 | 5.30E-11 | 1 | MGAIVAVTGDGVNDSPALK | 3.28E+07 | parkin null-Rep I  |
| gil2944333 | FBgn0002921 | 907.97 | 1813.93 | 1813.92 | 0     | 0 | 104 | 6.10E-10 | 1 | MGAIVAVTGDGVNDSPALK | 3.57E+07 | control-Rep II     |
| gil2944333 | FBgn0002921 | 962.96 | 1923.9  | 1923.91 | -0.01 | 0 | 91  | 6.70E-09 | 1 | NLEAVETLGGTSTICSDDK | 3.36E+06 | control-Rep I      |
| gil2944333 | FBgn0002921 | 962.97 | 1923.93 | 1923.91 | 0.02  | 0 | 93  | 4.90E-09 | 1 | NLEAVETLGGTSTICSDDK | 4.26E+06 | control-Rep II     |
| gil2944333 | FBgn0002921 | 962.97 | 1923.93 | 1923.91 | 0.02  | 0 | 89  | 1.20E-08 | 1 | NLEAVETLGGTSTICSDDK | 4.27E+06 | parkin null-Rep II |
| gil2944333 | FBgn0002921 | 638.35 | 1274.69 | 1274.68 | 0     | 0 | 39  | 0.0036   | 1 | NMVPQFATVIR         | 1.98E+07 | parkin null-Rep I  |
| gil2944333 | FBgn0002921 | 638.35 | 1274.68 | 1274.68 | 0     | 0 | 43  | 0.00097  | 1 | NMVPQFATVIR         | 2.03E+07 | control-Rep II     |
| gil2944333 | FBgn0002921 | 638.35 | 1274.69 | 1274.68 | 0     | 0 | 24  | 0.13     | 1 | NMVPQFATVIR         | 2.07E+07 | control-Rep I      |
| gil2944333 | FBgn0002921 | 638.35 | 1274.69 | 1274.68 | 0.01  | 0 | 27  | 0.038    | 1 | NMVPQFATVIR         | 2.18E+07 | parkin null-Rep II |
| gil2944333 | FBgn0002921 | 806.88 | 1611.74 | 1611.73 | 0.01  | 1 | 36  | 0.0017   | 1 | RNPGGWLEQETYY       | 2.18E+07 | parkin null-Rep II |
| gil2944333 | FBgn0002921 | 806.88 | 1611.74 | 1611.73 | 0.01  | 1 | 27  | 0.013    | 1 | RNPGGWLEQETYY       | 2.26E+07 | control-Rep I      |
| gil2944333 | FBgn0002921 | 806.87 | 1611.73 | 1611.73 | 0     | 1 | 23  | 0.034    | 1 | RNPGGWLEQETYY       | 2.32E+07 | control-Rep II     |
| gil2944333 | FBgn0002921 | 806.87 | 1611.73 | 1611.73 | 0     | 1 | 43  | 0.0003   | 1 | RNPGGWLEQETYY       | 2.50E+07 | parkin null-Rep I  |
| gil2944333 | FBgn0002921 | 958.98 | 1915.95 | 1915.95 | 0     | 0 | 103 | 7.30E-10 | 1 | SVGIISEGNETVEDIAQR  | 3.01E+07 | parkin null-Rep II |
| gil2944333 | FBgn0002921 | 958.98 | 1915.95 | 1915.95 | 0     | 0 | 86  | 3.60E-08 | 1 | SVGIISEGNETVEDIAQR  | 3.20E+07 | parkin null-Rep I  |
| gil2944333 | FBgn0002921 | 958.98 | 1915.94 | 1915.95 | -0.01 | 0 | 111 | 1.20E-10 | 1 | SVGIISEGNETVEDIAQR  | 3.34E+07 | control-Rep II     |
| gil2944333 | FBgn0002921 | 958.99 | 1915.96 | 1915.95 | 0.02  | 0 | 116 | 3.80E-11 | 1 | SVGIISEGNETVEDIAQR  | 3.57E+07 | control-Rep I      |
| gil2944333 | FBgn0002921 | 803.37 | 1604.73 | 1604.73 | 0     | 0 | 43  | 0.00049  | 1 | VDNSSLTGESEPPQR     | 1.49E+05 | control-Rep I      |

|            |             |         |         |         |       |   |     |          |   |                        |          |                    |
|------------|-------------|---------|---------|---------|-------|---|-----|----------|---|------------------------|----------|--------------------|
| gij2944333 | FBgn0002921 | 803.37  | 1604.73 | 1604.73 | 0     | 0 | 42  | 0.00049  | 1 | VDNSSLTGESEPPQSR       | 3.39E+05 | parkin null-Rep I  |
| gij2944333 | FBgn0002921 | 803.37  | 1604.73 | 1604.73 | 0     | 0 | 32  | 0.0053   | 1 | VDNSSLTGESEPPQSR       | 3.53E+05 | control-Rep II     |
| gij2944333 | FBgn0002921 | 745.7   | 2234.07 | 2234.05 | 0.01  | 1 | 36  | 0.0041   | 1 | VLGFCDFMLPSDKYPNGFK    | 1.81E+07 | parkin null-Rep II |
| gij2944333 | FBgn0002921 | 745.69  | 2234.06 | 2234.05 | 0.01  | 1 | 48  | 0.00025  | 1 | VLGFCDFMLPSDKYPNGFK    | 2.17E+07 | control-Rep II     |
| gij2944333 | FBgn0002921 | 745.69  | 2234.06 | 2234.05 | 0     | 1 | 42  | 0.00099  | 1 | VLGFCDFMLPSDKYPNGFK    | 2.32E+07 | parkin null-Rep I  |
| gij2944333 | FBgn0002921 | 745.7   | 2234.07 | 2234.05 | 0.01  | 1 | 38  | 0.0025   | 1 | VLGFCDFMLPSDKYPNGFK    | 2.38E+07 | control-Rep I      |
| gij2944333 | FBgn0002921 | 601.94  | 1802.81 | 1802.81 | 0     | 0 | 34  | 0.0024   | 1 | YQVSIHETEDTNDPR        | 6.16E+07 | parkin null-Rep II |
| gij2944333 | FBgn0002921 | 601.94  | 1802.81 | 1802.81 | 0     | 0 | 43  | 0.00026  | 1 | YQVSIHETEDTNDPR        | 7.56E+07 | parkin null-Rep I  |
| gij2944333 | FBgn0002921 | 601.94  | 1802.81 | 1802.81 | 0     | 0 | 44  | 0.00026  | 1 | YQVSIHETEDTNDPR        | 9.60E+07 | control-Rep II     |
| gij2944333 | FBgn0002921 | 601.94  | 1802.81 | 1802.81 | 0     | 0 | 36  | 0.0013   | 1 | YQVSIHETEDTNDPR        | 9.61E+07 | control-Rep I      |
| gij84873   | FBgn0002938 | 564.34  | 1126.67 | 1126.67 | 0     | 0 | 25  | 0.026    | 1 | ALGVLDTVIAR            | 7.82E+06 | parkin null-Rep II |
| gij84873   | FBgn0002938 | 564.35  | 1126.69 | 1126.67 | 0.01  | 0 | 27  | 0.02     | 1 | ALGVLDTVIAR            | 9.23E+06 | parkin null-Rep I  |
| gij84873   | FBgn0002938 | 564.35  | 1126.68 | 1126.67 | 0.01  | 0 | 24  | 0.037    | 1 | ALGVLDTVIAR            | 1.15E+07 | control-Rep II     |
| gij84872   | FBgn0002938 | 564.35  | 1126.68 | 1126.67 | 0.01  | 0 | 30  | 0.0088   | 1 | ALGVLDTVIAR            | 1.55E+07 | control-Rep I      |
| gij84873   | FBgn0002938 | 1008.95 | 2015.89 | 2015.87 | 0.01  | 0 | 37  | 0.00064  | 1 | DYCDHPNLPEFYGVYK       | 1.42E+06 | parkin null-Rep I  |
| gij84872   | FBgn0002938 | 672.97  | 2015.89 | 2015.87 | 0.02  | 0 | 34  | 0.0012   | 1 | DYCDHPNLPEFYGVYK       | 4.11E+06 | control-Rep I      |
| gij84873   | FBgn0002938 | 815.9   | 1629.79 | 1629.8  | -0.01 | 0 | 39  | 0.0016   | 1 | EPQHIVLSGESYSYGK       | 6.73E+05 | control-Rep II     |
| gij84873   | FBgn0002938 | 544.27  | 1629.79 | 1629.8  | -0.01 | 0 | 34  | 0.01     | 1 | EPQHIVLSGESYSYGK       | 1.28E+06 | parkin null-Rep I  |
| gij84873   | FBgn0002938 | 735.33  | 2202.98 | 2202.98 | 0     | 0 | 58  | 7.40E-06 | 1 | IQHYDEEHQVSIEEYR       | 1.72E+07 | parkin null-Rep II |
| gij84873   | FBgn0002938 | 735.33  | 2202.98 | 2202.98 | 0     | 0 | 53  | 2.00E-05 | 1 | IQHYDEEHQVSIEEYR       | 2.24E+07 | parkin null-Rep I  |
| gij84872   | FBgn0002938 | 735.33  | 2202.98 | 2202.98 | 0     | 0 | 47  | 8.90E-05 | 1 | IQHYDEEHQVSIEEYR       | 2.31E+07 | control-Rep I      |
| gij84873   | FBgn0002938 | 735.33  | 2202.98 | 2202.98 | 0     | 0 | 55  | 1.50E-05 | 1 | IQHYDEEHQVSIEEYR       | 2.51E+07 | control-Rep II     |
| gij84873   | FBgn0002938 | 518.78  | 1035.54 | 1035.54 | 0     | 0 | 38  | 0.0021   | 1 | LPFDEFRLR              | 2.28E+07 | parkin null-Rep II |
| gij84873   | FBgn0002938 | 518.78  | 1035.55 | 1035.54 | 0.01  | 0 | 36  | 0.0051   | 1 | LPFDEFRLR              | 2.51E+07 | parkin null-Rep I  |
| gij84873   | FBgn0002938 | 518.78  | 1035.55 | 1035.54 | 0.01  | 0 | 38  | 0.0027   | 1 | LPFDEFRLR              | 2.54E+07 | control-Rep II     |
| gij84872   | FBgn0002938 | 518.78  | 1035.54 | 1035.54 | 0     | 0 | 49  | 0.00018  | 1 | LPFDEFRLR              | 3.33E+07 | control-Rep I      |
| gij84873   | FBgn0002938 | 529.28  | 1584.82 | 1584.82 | 0     | 0 | 21  | 0.22     | 1 | MLSQNANLGVHFVR         | 1.39E+07 | parkin null-Rep I  |
| gij84873   | FBgn0002938 | 529.28  | 1584.82 | 1584.82 | 0     | 0 | 43  | 0.0015   | 1 | MLSQNANLGVHFVR         | 1.46E+07 | control-Rep II     |
| gij84872   | FBgn0002938 | 529.28  | 1584.82 | 1584.82 | 0     | 0 | 37  | 0.003    | 1 | MLSQNANLGVHFVR         | 1.56E+07 | control-Rep I      |
| gij84872   | FBgn0002938 | 844.42  | 2530.24 | 2530.23 | 0.01  | 0 | 44  | 0.00086  | 1 | MYPEDLAALNPVDENIIESLR  | 6.37E+06 | control-Rep I      |
| gij84873   | FBgn0002938 | 1266.13 | 2530.25 | 2530.23 | 0.03  | 0 | 108 | 1.90E-10 | 1 | MYPEDLAALNPVDENIIESLR  | 9.68E+06 | control-Rep II     |
| gij84873   | FBgn0002938 | 632.32  | 1262.63 | 1262.62 | 0.01  | 0 | 61  | 2.10E-05 | 1 | SDIAEMLELSR            | 1.14E+07 | parkin null-Rep I  |
| gij84873   | FBgn0002938 | 632.32  | 1262.63 | 1262.62 | 0.01  | 0 | 58  | 3.70E-05 | 1 | SDIAEMLELSR            | 1.22E+07 | parkin null-Rep II |
| gij84872   | FBgn0002938 | 632.32  | 1262.63 | 1262.62 | 0.01  | 0 | 58  | 4.00E-05 | 1 | SDIAEMLELSR            | 1.26E+07 | control-Rep I      |
| gij84873   | FBgn0002938 | 632.32  | 1262.63 | 1262.62 | 0.01  | 0 | 64  | 1.00E-05 | 1 | SDIAEMLELSR            | 1.38E+07 | control-Rep II     |
| gij84873   | FBgn0002938 | 817.77  | 2450.28 | 2450.27 | 0.01  | 0 | 39  | 0.0013   | 1 | TALDNLLTKPDGLFYIIDDASR | 8.91E+06 | parkin null-Rep II |
| gij84873   | FBgn0002938 | 817.77  | 2450.29 | 2450.27 | 0.02  | 0 | 46  | 0.00022  | 1 | TALDNLLTKPDGLFYIIDDASR | 1.20E+07 | parkin null-Rep I  |
| gij84872   | FBgn0002938 | 817.77  | 2450.29 | 2450.27 | 0.02  | 0 | 41  | 0.00073  | 1 | TALDNLLTKPDGLFYIIDDASR | 1.43E+07 | control-Rep I      |
| gij84873   | FBgn0002938 | 698.34  | 1394.67 | 1394.67 | 0     | 0 | 66  | 2.80E-06 | 1 | YAEVENTDIVSR           | 9.56E+06 | parkin null-Rep II |

|             |             |         |         |         |       |   |     |          |   |                    |          |                    |
|-------------|-------------|---------|---------|---------|-------|---|-----|----------|---|--------------------|----------|--------------------|
| gil84873    | FBgn0002938 | 698.34  | 1394.66 | 1394.67 | 0     | 0 | 62  | 6.80E-06 | 1 | YAEVENTDIVSR       | 1.21E+07 | parkin null-Rep I  |
| gil84873    | FBgn0002938 | 698.34  | 1394.66 | 1394.67 | -0.01 | 0 | 62  | 5.50E-06 | 1 | YAEVENTDIVSR       | 1.55E+07 | control-Rep II     |
| gil84872    | FBgn0002938 | 698.34  | 1394.67 | 1394.67 | 0     | 0 | 35  | 0.006    | 1 | YAEVENTDIVSR       | 1.72E+07 | control-Rep I      |
| gil24651916 | FBgn0003074 | 624.31  | 1869.91 | 1869.91 | -0.01 | 1 | 22  | 0.16     | 1 | GTDPVLVDDKDVMPPDVR | 9.49E+05 | control-Rep II     |
| gil24651916 | FBgn0003074 | 624.32  | 1869.94 | 1869.91 | 0.02  | 1 | 36  | 0.0079   | 1 | GTDPVLVDDKDVMPPDVR | 1.34E+06 | parkin null-Rep I  |
| gil24651916 | FBgn0003074 | 910.51  | 1819    | 1818.99 | 0.01  | 0 | 109 | 1.00E-10 | 1 | ILLSNFLAQTEALMAGK  | 1.07E+07 | parkin null-Rep II |
| gil24651916 | FBgn0003074 | 910.51  | 1819.01 | 1818.99 | 0.02  | 0 | 109 | 1.10E-10 | 1 | ILLSNFLAQTEALMAGK  | 1.17E+07 | control-Rep I      |
| gil24651916 | FBgn0003074 | 910.51  | 1819    | 1818.99 | 0.01  | 0 | 103 | 3.90E-10 | 1 | ILLSNFLAQTEALMAGK  | 1.27E+07 | parkin null-Rep I  |
| gil24651916 | FBgn0003074 | 910.51  | 1819.01 | 1818.99 | 0.02  | 0 | 96  | 1.90E-09 | 1 | ILLSNFLAQTEALMAGK  | 1.36E+07 | control-Rep II     |
| gil24651916 | FBgn0003074 | 821.96  | 1641.91 | 1641.9  | 0.01  | 0 | 77  | 2.40E-07 | 1 | INDEVWDLTLLAK      | 4.28E+06 | parkin null-Rep II |
| gil24651916 | FBgn0003074 | 821.96  | 1641.91 | 1641.9  | 0.01  | 0 | 73  | 5.60E-07 | 1 | INDEVWDLTLLAK      | 4.90E+06 | parkin null-Rep I  |
| gil24651916 | FBgn0003074 | 821.96  | 1641.91 | 1641.9  | 0.01  | 0 | 69  | 1.30E-06 | 1 | INDEVWDLTLLAK      | 5.66E+06 | control-Rep II     |
| gil24651916 | FBgn0003074 | 821.96  | 1641.91 | 1641.9  | 0.01  | 0 | 77  | 2.40E-07 | 1 | INDEVWDLTLLAK      | 6.21E+06 | control-Rep I      |
| gil24651916 | FBgn0003074 | 807.41  | 1612.81 | 1612.79 | 0.01  | 0 | 89  | 3.20E-08 | 1 | TFTTQETITNATSAK    | 1.83E+06 | parkin null-Rep I  |
| gil24651916 | FBgn0003074 | 807.4   | 1612.79 | 1612.79 | -0.01 | 0 | 90  | 2.40E-08 | 1 | TFTTQETITNATSAK    | 2.84E+06 | control-Rep I      |
| gil10959    | FBgn0003149 | 701.86  | 1401.71 | 1401.7  | 0.01  | 1 | 43  | 0.00084  | 1 | DLELELEEEKR        | 2.00E+06 | parkin null-Rep II |
| gil10959    | FBgn0003149 | 701.85  | 1401.69 | 1401.7  | -0.01 | 1 | 38  | 0.0021   | 1 | DLELELEEEKR        | 2.37E+06 | control-Rep II     |
| gil10959    | FBgn0003149 | 688.82  | 1375.63 | 1375.63 | 0     | 0 | 60  | 6.00E-06 | 1 | EVLVQCEEDQK        | 1.99E+06 | parkin null-Rep II |
| gil10959    | FBgn0003149 | 688.82  | 1375.63 | 1375.63 | 0     | 0 | 44  | 0.00029  | 1 | EVLVQCEEDQK        | 2.31E+06 | parkin null-Rep I  |
| gil10959    | FBgn0003149 | 688.82  | 1375.63 | 1375.63 | 0     | 0 | 60  | 5.90E-06 | 1 | EVLVQCEEDQK        | 2.82E+06 | control-Rep II     |
| gil10959    | FBgn0003149 | 688.82  | 1375.63 | 1375.63 | 0     | 0 | 49  | 7.90E-05 | 1 | EVLVQCEEDQK        | 4.34E+06 | control-Rep I      |
| gil10959    | FBgn0003149 | 1046.02 | 2090.03 | 2090.02 | 0     | 0 | 99  | 1.40E-09 | 1 | FQTEVYELLSQIESYNK  | 3.44E+06 | control-Rep II     |
| gil10959    | FBgn0003149 | 1046.03 | 2090.05 | 2090.02 | 0.03  | 0 | 97  | 2.80E-09 | 1 | FQTEVYELLSQIESYNK  | 3.71E+06 | parkin null-Rep II |
| gil10959    | FBgn0003149 | 1046.03 | 2090.04 | 2090.02 | 0.02  | 0 | 97  | 3.00E-09 | 1 | FQTEVYELLSQIESYNK  | 3.85E+06 | parkin null-Rep I  |
| gil10959    | FBgn0003149 | 1046.03 | 2090.04 | 2090.02 | 0.02  | 0 | 95  | 4.80E-09 | 1 | FQTEVYELLSQIESYNK  | 7.22E+06 | control-Rep I      |
| gil10959    | FBgn0003149 | 506.91  | 1517.71 | 1517.72 | -0.01 | 0 | 24  | 0.033    | 1 | HVVEQVHEEQER       | 1.45E+05 | control-Rep I      |
| gil10959    | FBgn0003149 | 506.92  | 1517.74 | 1517.72 | 0.02  | 0 | 26  | 0.034    | 1 | HVVEQVHEEQER       | 1.65E+05 | parkin null-Rep I  |
| gil10959    | FBgn0003149 | 506.92  | 1517.74 | 1517.72 | 0.02  | 0 | 36  | 0.0034   | 1 | HVVEQVHEEQER       | 1.68E+05 | control-Rep II     |
| gil10959    | FBgn0003149 | 506.92  | 1517.74 | 1517.72 | 0.02  | 0 | 26  | 0.034    | 1 | HVVEQVHEEQER       | 2.68E+05 | parkin null-Rep II |
| gil10959    | FBgn0003149 | 801.46  | 1600.91 | 1600.9  | 0     | 0 | 61  | 6.80E-06 | 1 | INELTTANVSLVSIK    | 8.70E+06 | parkin null-Rep I  |
| gil10959    | FBgn0003149 | 801.46  | 1600.91 | 1600.9  | 0     | 0 | 52  | 5.90E-05 | 1 | INELTTANVSLVSIK    | 1.05E+07 | parkin null-Rep II |
| gil10959    | FBgn0003149 | 758.4   | 1514.78 | 1514.78 | 0     | 1 | 64  | 8.20E-06 | 1 | IRDLELELEEEK       | 4.24E+06 | parkin null-Rep I  |
| gil10959    | FBgn0003149 | 505.94  | 1514.8  | 1514.78 | 0.02  | 1 | 24  | 0.078    | 1 | IRDLELELEEEK       | 4.56E+06 | parkin null-Rep II |
| gil10959    | FBgn0003149 | 758.4   | 1514.79 | 1514.78 | 0     | 1 | 54  | 8.10E-05 | 1 | IRDLELELEEEK       | 4.59E+06 | control-Rep II     |
| gil10959    | FBgn0003149 | 505.93  | 1514.77 | 1514.78 | -0.01 | 1 | 27  | 0.034    | 1 | IRDLELELEEEK       | 6.81E+06 | control-Rep I      |
| gil10959    | FBgn0003149 | 551.64  | 1651.91 | 1651.9  | 0.01  | 0 | 37  | 0.0025   | 1 | ITELEEHIESLIVK     | 2.18E+07 | control-Rep II     |
| gil10959    | FBgn0003149 | 551.64  | 1651.91 | 1651.9  | 0     | 0 | 27  | 0.023    | 1 | ITELEEHIESLIVK     | 2.57E+07 | parkin null-Rep I  |
| gil10959    | FBgn0003149 | 551.64  | 1651.91 | 1651.9  | 0     | 0 | 23  | 0.071    | 1 | ITELEEHIESLIVK     | 2.59E+07 | parkin null-Rep II |
| gil10959    | FBgn0003149 | 551.64  | 1651.91 | 1651.9  | 0     | 0 | 31  | 0.0099   | 1 | ITELEEHIESLIVK     | 3.47E+07 | control-Rep I      |

|           |             |         |         |         |       |   |     |          |   |                     |          |                    |
|-----------|-------------|---------|---------|---------|-------|---|-----|----------|---|---------------------|----------|--------------------|
| gil10959  | FBgn0003149 | 515.28  | 1542.82 | 1542.83 | -0.01 | 2 | 28  | 0.06     | 1 | LAEKDEIEAIRK        | 2.03E+05 | control-Rep I      |
| gil10959  | FBgn0003149 | 515.28  | 1542.82 | 1542.83 | -0.01 | 2 | 36  | 0.0098   | 1 | LAEKDEIEAIRK        | 2.17E+05 | parkin null-Rep II |
| gil10959  | FBgn0003149 | 515.28  | 1542.82 | 1542.83 | -0.01 | 2 | 30  | 0.036    | 1 | LAEKDEIEAIRK        | 3.88E+05 | parkin null-Rep I  |
| gil10959  | FBgn0003149 | 596.27  | 1785.78 | 1785.79 | -0.01 | 0 | 34  | 0.0014   | 1 | LEEAEAGGAEHQFEANR   | 6.67E+06 | parkin null-Rep II |
| gil10959  | FBgn0003149 | 596.27  | 1785.79 | 1785.79 | 0     | 0 | 46  | 0.0001   | 1 | LEEAEAGGAEHQFEANR   | 7.10E+06 | parkin null-Rep I  |
| gil10959  | FBgn0003149 | 596.27  | 1785.79 | 1785.79 | 0     | 0 | 48  | 7.10E-05 | 1 | LEEAEAGGAEHQFEANR   | 8.36E+06 | control-Rep II     |
| gil10959  | FBgn0003149 | 596.27  | 1785.79 | 1785.79 | 0     | 0 | 39  | 0.00049  | 1 | LEEAEAGGAEHQFEANR   | 9.27E+06 | control-Rep I      |
| gil10959  | FBgn0003149 | 679.87  | 1357.72 | 1357.71 | 0.01  | 0 | 77  | 5.00E-07 | 1 | LEEVELNAVAGSK       | 1.34E+07 | parkin null-Rep I  |
| gil10959  | FBgn0003149 | 679.86  | 1357.71 | 1357.71 | 0     | 0 | 52  | 0.00015  | 1 | LEEVELNAVAGSK       | 1.57E+07 | parkin null-Rep II |
| gil10959  | FBgn0003149 | 679.86  | 1357.71 | 1357.71 | 0     | 0 | 83  | 1.20E-07 | 1 | LEEVELNAVAGSK       | 1.70E+07 | control-Rep II     |
| gil10959  | FBgn0003149 | 679.86  | 1357.71 | 1357.71 | 0     | 0 | 78  | 3.60E-07 | 1 | LEEVELNAVAGSK       | 2.42E+07 | control-Rep I      |
| gil10959  | FBgn0003149 | 628.37  | 1254.72 | 1254.72 | 0     | 0 | 55  | 4.10E-05 | 1 | NLILLQDALDK         | 3.15E+07 | control-Rep II     |
| gil10959  | FBgn0003149 | 628.37  | 1254.72 | 1254.72 | 0     | 0 | 54  | 5.20E-05 | 1 | NLILLQDALDK         | 3.20E+07 | parkin null-Rep II |
| gil10959  | FBgn0003149 | 628.37  | 1254.72 | 1254.72 | 0     | 0 | 57  | 2.20E-05 | 1 | NLILLQDALDK         | 3.42E+07 | parkin null-Rep I  |
| gil10959  | FBgn0003149 | 628.37  | 1254.72 | 1254.72 | 0.01  | 0 | 65  | 3.70E-06 | 1 | NLILLQDALDK         | 4.47E+07 | control-Rep I      |
| gil10959  | FBgn0003149 | 802.92  | 1603.83 | 1603.83 | -0.01 | 0 | 68  | 2.40E-06 | 1 | QLQATLDQYAVAQR      | 1.49E+07 | parkin null-Rep I  |
| gil10959  | FBgn0003149 | 802.93  | 1603.84 | 1603.83 | 0.01  | 0 | 73  | 8.50E-07 | 1 | QLQATLDQYAVAQR      | 1.85E+07 | parkin null-Rep II |
| gil10959  | FBgn0003149 | 802.92  | 1603.83 | 1603.83 | 0     | 0 | 103 | 6.80E-10 | 1 | QLQATLDQYAVAQR      | 2.05E+07 | control-Rep II     |
| gil10959  | FBgn0003149 | 802.93  | 1603.84 | 1603.83 | 0.01  | 0 | 69  | 2.20E-06 | 1 | QLQATLDQYAVAQR      | 2.88E+07 | control-Rep I      |
| gil10959  | FBgn0003149 | 846.42  | 1690.82 | 1690.81 | 0     | 0 | 97  | 2.50E-09 | 1 | QLSEQEGVSQTTTR      | 1.73E+06 | parkin null-Rep II |
| gil10959  | FBgn0003149 | 846.42  | 1690.82 | 1690.81 | 0.01  | 0 | 78  | 1.80E-07 | 1 | QLSEQEGVSQTTTR      | 1.88E+06 | parkin null-Rep I  |
| gil10959  | FBgn0003149 | 846.41  | 1690.81 | 1690.81 | 0     | 0 | 101 | 9.40E-10 | 1 | QLSEQEGVSQTTTR      | 2.70E+06 | control-Rep II     |
| gil10959  | FBgn0003149 | 846.41  | 1690.81 | 1690.81 | 0     | 0 | 82  | 6.00E-08 | 1 | QLSEQEGVSQTTTR      | 3.48E+06 | control-Rep I      |
| gil10959  | FBgn0003149 | 686.68  | 2057.01 | 2057.02 | 0     | 0 | 21  | 0.099    | 1 | QSLQLTELQAHYEDVQR   | 2.64E+07 | parkin null-Rep I  |
| gil10959  | FBgn0003149 | 686.68  | 2057.02 | 2057.02 | 0.01  | 0 | 30  | 0.013    | 1 | QSLQLTELQAHYEDVQR   | 3.47E+07 | control-Rep II     |
| gil10959  | FBgn0003149 | 686.68  | 2057.02 | 2057.02 | 0.01  | 0 | 30  | 0.013    | 1 | QSLQLTELQAHYEDVQR   | 3.66E+07 | parkin null-Rep II |
| gil10959  | FBgn0003149 | 686.68  | 2057.02 | 2057.02 | 0     | 0 | 23  | 0.068    | 1 | QSLQLTELQAHYEDVQR   | 4.60E+07 | control-Rep I      |
| gil10959  | FBgn0003149 | 436.59  | 1306.75 | 1306.74 | 0.01  | 1 | 60  | 5.90E-06 | 1 | RLHELELELR          | 5.95E+05 | parkin null-Rep I  |
| gil10959  | FBgn0003149 | 436.59  | 1306.75 | 1306.74 | 0.01  | 1 | 49  | 8.30E-05 | 1 | RLHELELELR          | 3.82E+06 | control-Rep I      |
| gil103295 | FBgn0003149 | 752.9   | 1503.79 | 1503.78 | 0.01  | 0 | 29  | 0.019    | 1 | SASAIQAALLSESEK     | 4.59E+05 | parkin null-Rep II |
| gil103295 | FBgn0003149 | 752.9   | 1503.79 | 1503.78 | 0.01  | 0 | 27  | 0.035    | 1 | SASAIQAALLSESEK     | 2.59E+06 | control-Rep II     |
| gil10959  | FBgn0003149 | 685.36  | 2053.07 | 2053.07 | 0     | 0 | 41  | 0.00098  | 1 | SLLESSLHQVEIELDSVR  | 3.25E+07 | control-Rep II     |
| gil10959  | FBgn0003149 | 685.37  | 2053.09 | 2053.07 | 0.02  | 0 | 43  | 0.00066  | 1 | SLLESSLHQVEIELDSVR  | 4.05E+07 | parkin null-Rep II |
| gil10959  | FBgn0003149 | 685.37  | 2053.09 | 2053.07 | 0.02  | 0 | 47  | 0.00028  | 1 | SLLESSLHQVEIELDSVR  | 4.28E+07 | parkin null-Rep I  |
| gil10959  | FBgn0003149 | 685.37  | 2053.08 | 2053.07 | 0.01  | 0 | 54  | 5.50E-05 | 1 | SLLESSLHQVEIELDSVR  | 4.39E+07 | control-Rep I      |
| gil10959  | FBgn0003149 | 1108.06 | 2214.11 | 2214.12 | -0.01 | 0 | 57  | 2.70E-05 | 1 | TFVTTSTVPGSQVYIQTTR | 5.47E+06 | control-Rep II     |
| gil10959  | FBgn0003149 | 1108.05 | 2214.09 | 2214.12 | -0.03 | 0 | 59  | 1.50E-05 | 1 | TFVTTSTVPGSQVYIQTTR | 6.72E+06 | parkin null-Rep I  |
| gil10959  | FBgn0003149 | 1108.06 | 2214.1  | 2214.12 | -0.02 | 0 | 78  | 2.00E-07 | 1 | TFVTTSTVPGSQVYIQTTR | 8.12E+06 | control-Rep I      |
| gil10959  | FBgn0003149 | 698.34  | 1394.67 | 1394.67 | 0     | 0 | 63  | 6.10E-06 | 1 | TVELQYEEAASR        | 1.72E+07 | control-Rep I      |

|             |             |         |         |         |       |   |    |          |   |                            |          |                    |
|-------------|-------------|---------|---------|---------|-------|---|----|----------|---|----------------------------|----------|--------------------|
| gij10959    | FBgn0003149 | 698.34  | 1394.67 | 1394.67 | 0     | 0 | 81 | 1.00E-07 | 1 | TVELQYEEAASR               | 2.29E+07 | parkin null-Rep II |
| gij10959    | FBgn0003149 | 698.34  | 1394.67 | 1394.67 | 0     | 0 | 80 | 1.10E-07 | 1 | TVELQYEEAASR               | 2.71E+07 | parkin null-Rep I  |
| gij10959    | FBgn0003149 | 698.34  | 1394.67 | 1394.67 | 0     | 0 | 81 | 1.00E-07 | 1 | TVELQYEEAASR               | 3.07E+07 | control-Rep II     |
| gij1079084  | FBgn0003162 | 975.12  | 2922.34 | 2922.32 | 0.01  | 0 | 62 | 3.30E-06 | 1 | GYDQSLEDVNLGAVFDEHDHEMNVVK | 4.60E+06 | parkin null-Rep I  |
| gij38455513 | FBgn0003162 | 975.12  | 2922.33 | 2922.32 | 0.01  | 0 | 65 | 1.50E-06 | 1 | GYDQSLEDVNLGAVFDEHDHEMNVVK | 9.03E+06 | control-Rep II     |
| gij1079084  | FBgn0003162 | 975.12  | 2922.34 | 2922.32 | 0.01  | 0 | 48 | 8.90E-05 | 1 | GYDQSLEDVNLGAVFDEHDHEMNVVK | 9.90E+06 | parkin null-Rep II |
| gij38455513 | FBgn0003162 | 606.33  | 1210.64 | 1210.64 | 0     | 0 | 62 | 7.80E-06 | 1 | TVTSTMLGVFR                | 8.21E+07 | control-Rep II     |
| gij1079084  | FBgn0003162 | 606.33  | 1210.64 | 1210.64 | 0     | 0 | 68 | 1.70E-06 | 1 | TVTSTMLGVFR                | 9.21E+07 | parkin null-Rep II |
| gij1079084  | FBgn0003162 | 606.33  | 1210.64 | 1210.64 | 0     | 0 | 61 | 8.50E-06 | 1 | TVTSTMLGVFR                | 9.35E+07 | control-Rep I      |
| gij1079084  | FBgn0003162 | 606.33  | 1210.64 | 1210.64 | 0     | 0 | 49 | 0.00014  | 1 | TVTSTMLGVFR                | 9.43E+07 | parkin null-Rep I  |
| gij3128475  | FBgn0003178 | 1268.59 | 2535.17 | 2535.18 | -0.02 | 0 | 66 | 2.20E-06 | 1 | AEISDVANAVLDGADCVMVLSGETAK | 7.02E+05 | parkin null-Rep II |
| gij3128475  | FBgn0003178 | 846.08  | 2535.21 | 2535.18 | 0.03  | 0 | 56 | 1.90E-05 | 1 | AEISDVANAVLDGADCVMVLSGETAK | 1.05E+07 | control-Rep II     |
| gij27819773 | FBgn0003178 | 846.07  | 2535.19 | 2535.18 | 0     | 0 | 60 | 5.20E-06 | 1 | AEISDVANAVLDGADCVMVLSGETAK | 1.12E+07 | control-Rep I      |
| gij3128475  | FBgn0003178 | 621.66  | 1861.96 | 1861.95 | 0.01  | 0 | 55 | 7.90E-05 | 1 | AGKPVICATQMLESMVK          | 1.01E+07 | parkin null-Rep II |
| gij3128475  | FBgn0003178 | 621.66  | 1861.95 | 1861.95 | 0.01  | 0 | 43 | 0.0012   | 1 | AGKPVICATQMLESMVK          | 1.13E+07 | control-Rep II     |
| gij3128475  | FBgn0003178 | 621.66  | 1861.95 | 1861.95 | 0.01  | 0 | 43 | 0.0011   | 1 | AGKPVICATQMLESMVK          | 1.33E+07 | parkin null-Rep I  |
| gij27819773 | FBgn0003178 | 621.66  | 1861.96 | 1861.95 | 0.01  | 0 | 50 | 0.00025  | 1 | AGKPVICATQMLESMVK          | 1.67E+07 | control-Rep I      |
| gij3128475  | FBgn0003178 | 573.84  | 1145.67 | 1145.67 | 0     | 0 | 28 | 0.019    | 1 | ASAIVVITTSVK               | 1.36E+06 | parkin null-Rep II |
| gij3128475  | FBgn0003178 | 573.84  | 1145.67 | 1145.67 | 0     | 0 | 35 | 0.004    | 1 | ASAIVVITTSVK               | 1.88E+06 | control-Rep II     |
| gij27819773 | FBgn0003178 | 573.84  | 1145.67 | 1145.67 | 0     | 0 | 30 | 0.012    | 1 | ASAIVVITTSVK               | 4.14E+06 | control-Rep I      |
| gij3128475  | FBgn0003178 | 948.5   | 1894.99 | 1894.97 | 0.01  | 0 | 86 | 3.00E-08 | 1 | GAGTIDASHAAAIAAVEAATK      | 1.58E+07 | parkin null-Rep II |
| gij3128475  | FBgn0003178 | 632.67  | 1894.98 | 1894.97 | 0.01  | 0 | 56 | 2.90E-05 | 1 | GAGTIDASHAAAIAAVEAATK      | 2.85E+07 | control-Rep II     |
| gij3128475  | FBgn0003178 | 632.67  | 1894.98 | 1894.97 | 0.01  | 0 | 48 | 0.0002   | 1 | GAGTIDASHAAAIAAVEAATK      | 2.95E+07 | parkin null-Rep I  |
| gij27819773 | FBgn0003178 | 632.67  | 1894.98 | 1894.97 | 0.01  | 0 | 44 | 0.00049  | 1 | GAGTIDASHAAAIAAVEAATK      | 3.12E+07 | control-Rep I      |
| gij3128475  | FBgn0003178 | 755.87  | 1509.73 | 1509.72 | 0     | 0 | 24 | 0.041    | 1 | GEYPLECVLTMVK              | 3.88E+06 | parkin null-Rep II |
| gij27819773 | FBgn0003178 | 755.86  | 1509.71 | 1509.72 | -0.02 | 0 | 44 | 0.00036  | 1 | GEYPLECVLTMVK              | 5.71E+06 | control-Rep I      |
| gij3128475  | FBgn0003178 | 885.1   | 2652.29 | 2652.26 | 0.03  | 0 | 39 | 0.0012   | 1 | IENQQGMHNLDEIIEAGDGIMVAR   | 1.28E+07 | parkin null-Rep II |
| gij3128475  | FBgn0003178 | 885.1   | 2652.29 | 2652.26 | 0.03  | 0 | 55 | 2.90E-05 | 1 | IENQQGMHNLDEIIEAGDGIMVAR   | 1.37E+07 | control-Rep II     |
| gij3128475  | FBgn0003178 | 885.11  | 2652.3  | 2652.26 | 0.03  | 0 | 58 | 1.40E-05 | 1 | IENQQGMHNLDEIIEAGDGIMVAR   | 1.45E+07 | parkin null-Rep I  |
| gij3128475  | FBgn0003178 | 910.02  | 1818.03 | 1818.03 | 0     | 1 | 23 | 0.027    | 1 | KGVNLPVGPVLDLPAVSEK        | 2.71E+06 | parkin null-Rep I  |
| gij3128475  | FBgn0003178 | 910.02  | 1818.02 | 1818.03 | -0.01 | 1 | 52 | 4.70E-05 | 1 | KGVNLPVGPVLDLPAVSEK        | 4.67E+06 | parkin null-Rep II |
| gij3128475  | FBgn0003178 | 1039.53 | 2077.05 | 2077.04 | 0     | 0 | 52 | 0.00012  | 1 | LSGIVCTIGPASSVEMLEK        | 1.61E+06 | parkin null-Rep II |
| gij3128475  | FBgn0003178 | 1039.53 | 2077.05 | 2077.04 | 0     | 0 | 40 | 0.0011   | 1 | LSGIVCTIGPASSVEMLEK        | 1.68E+06 | parkin null-Rep I  |
| gij27819773 | FBgn0003178 | 1039.53 | 2077.05 | 2077.04 | 0     | 0 | 34 | 0.0083   | 1 | LSGIVCTIGPASSVEMLEK        | 2.60E+06 | control-Rep I      |
| gij3128475  | FBgn0003178 | 710     | 2126.98 | 2126.97 | 0.01  | 0 | 60 | 7.40E-06 | 1 | MNFSHGSHEYHAATVANVR        | 1.51E+06 | parkin null-Rep II |
| gij3128475  | FBgn0003178 | 710     | 2126.97 | 2126.97 | 0     | 0 | 55 | 1.90E-05 | 1 | MNFSHGSHEYHAATVANVR        | 2.51E+06 | parkin null-Rep I  |
| gij27819773 | FBgn0003178 | 709.99  | 2126.96 | 2126.97 | -0.01 | 0 | 51 | 4.20E-05 | 1 | MNFSHGSHEYHAATVANVR        | 2.81E+06 | control-Rep I      |
| gij132748   | FBgn0003279 | 619.36  | 1855.05 | 1855.04 | 0     | 0 | 32 | 0.0035   | 1 | APIRPDVVNEVHQLLR           | 1.56E+07 | control-Rep II     |
| gij132748   | FBgn0003279 | 619.36  | 1855.05 | 1855.04 | 0.01  | 0 | 29 | 0.0067   | 1 | APIRPDVVNEVHQLLR           | 1.68E+07 | parkin null-Rep I  |

|           |             |        |         |         |       |   |    |          |   |                        |          |                    |
|-----------|-------------|--------|---------|---------|-------|---|----|----------|---|------------------------|----------|--------------------|
| gil132748 | FBgn0003279 | 619.35 | 1855.04 | 1855.04 | 0     | 0 | 29 | 0.01     | 1 | APIRPDVVNEVHQLLR       | 1.84E+07 | parkin null-Rep II |
| gil132748 | FBgn0003279 | 619.36 | 1855.05 | 1855.04 | 0     | 0 | 42 | 0.00035  | 1 | APIRPDVVNEVHQLLR       | 2.01E+07 | control-Rep I      |
| gil132748 | FBgn0003279 | 718.71 | 2153.11 | 2153.1  | 0.01  | 0 | 27 | 0.029    | 1 | GHVIDGVSEFPLVVSDEVQK   | 2.93E+06 | parkin null-Rep I  |
| gil132748 | FBgn0003279 | 718.71 | 2153.11 | 2153.1  | 0.01  | 0 | 36 | 0.0037   | 1 | GHVIDGVSEFPLVVSDEVQK   | 3.33E+06 | control-Rep I      |
| gil132748 | FBgn0003279 | 718.71 | 2153.11 | 2153.1  | 0.01  | 0 | 34 | 0.0056   | 1 | GHVIDGVSEFPLVVSDEVQK   | 4.82E+06 | parkin null-Rep II |
| gil132748 | FBgn0003279 | 769.37 | 2305.07 | 2305.07 | 0     | 0 | 55 | 2.30E-05 | 1 | QAYAVSELAGHQTSAESWGTGR | 3.86E+06 | parkin null-Rep II |
| gil132748 | FBgn0003279 | 769.37 | 2305.09 | 2305.07 | 0.02  | 0 | 31 | 0.014    | 1 | QAYAVSELAGHQTSAESWGTGR | 4.00E+06 | control-Rep II     |
| gil132748 | FBgn0003279 | 769.37 | 2305.09 | 2305.07 | 0.02  | 0 | 55 | 2.20E-05 | 1 | QAYAVSELAGHQTSAESWGTGR | 4.80E+06 | control-Rep I      |
| gil132748 | FBgn0003279 | 923.04 | 1844.06 | 1844.04 | 0.02  | 0 | 66 | 9.20E-07 | 1 | YALVSAIAASGVPALVQSK    | 8.14E+06 | parkin null-Rep II |
| gil132748 | FBgn0003279 | 923.03 | 1844.05 | 1844.04 | 0.01  | 0 | 75 | 1.80E-07 | 1 | YALVSAIAASGVPALVQSK    | 8.75E+06 | control-Rep II     |
| gil132748 | FBgn0003279 | 923.03 | 1844.04 | 1844.04 | 0     | 0 | 66 | 1.60E-06 | 1 | YALVSAIAASGVPALVQSK    | 9.02E+06 | parkin null-Rep I  |
| gil132748 | FBgn0003279 | 923.04 | 1844.06 | 1844.04 | 0.02  | 0 | 71 | 3.10E-07 | 1 | YALVSAIAASGVPALVQSK    | 1.14E+07 | control-Rep I      |
| gil103144 | FBgn0003392 | 919.46 | 1836.91 | 1836.89 | 0.02  | 0 | 66 | 6.00E-06 | 1 | AMLQMIQQLQSDFER        | 6.64E+06 | control-Rep II     |
| gil103144 | FBgn0003392 | 919.46 | 1836.91 | 1836.89 | 0.02  | 0 | 71 | 2.00E-06 | 1 | AMLQMIQQLQSDFER        | 6.92E+06 | parkin null-Rep II |
| gil103144 | FBgn0003392 | 919.46 | 1836.91 | 1836.89 | 0.02  | 0 | 49 | 0.00027  | 1 | AMLQMIQQLQSDFER        | 9.48E+06 | control-Rep I      |
| gil103144 | FBgn0003392 | 952.99 | 1903.96 | 1903.95 | 0.01  | 0 | 86 | 4.10E-08 | 1 | TIEGSGSALVNTNELSGGAK   | 1.16E+07 | control-Rep I      |
| gil103144 | FBgn0003392 | 952.98 | 1903.95 | 1903.95 | 0     | 0 | 63 | 6.80E-06 | 1 | TIEGSGSALVNTNELSGGAK   | 1.17E+07 | parkin null-Rep II |
| gil103144 | FBgn0003392 | 952.97 | 1903.93 | 1903.95 | -0.02 | 0 | 79 | 1.40E-07 | 1 | TIEGSGSALVNTNELSGGAK   | 1.26E+07 | control-Rep II     |
| gil103144 | FBgn0003392 | 819.44 | 1636.87 | 1636.85 | 0.01  | 0 | 26 | 0.071    | 1 | VGLFTPDMAFEAIVK        | 5.75E+06 | control-Rep II     |
| gil103144 | FBgn0003392 | 819.43 | 1636.85 | 1636.85 | 0     | 0 | 52 | 9.10E-05 | 1 | VGLFTPDMAFEAIVK        | 6.57E+06 | control-Rep I      |
| gil103144 | FBgn0003392 | 819.44 | 1636.87 | 1636.85 | 0.01  | 0 | 27 | 0.056    | 1 | VGLFTPDMAFEAIVK        | 6.61E+06 | parkin null-Rep I  |
| gil8647   | FBgn0003462 | 806.9  | 1611.79 | 1611.78 | 0.01  | 0 | 69 | 1.50E-06 | 1 | GTVFFEQESSGTPVK        | 4.50E+06 | parkin null-Rep II |
| gil8647   | FBgn0003462 | 806.9  | 1611.79 | 1611.78 | 0.01  | 0 | 62 | 7.60E-06 | 1 | GTVFFEQESSGTPVK        | 5.86E+06 | control-Rep II     |
| gil8647   | FBgn0003462 | 806.9  | 1611.79 | 1611.78 | 0.01  | 0 | 58 | 1.70E-05 | 1 | GTVFFEQESSGTPVK        | 8.12E+06 | control-Rep I      |
| gil8647   | FBgn0003462 | 631.86 | 1261.71 | 1261.7  | 0     | 0 | 54 | 3.80E-05 | 1 | ITLFGADSIIGR           | 6.35E+06 | control-Rep II     |
| gil8647   | FBgn0003462 | 631.86 | 1261.71 | 1261.7  | 0.01  | 0 | 67 | 1.90E-06 | 1 | ITLFGADSIIGR           | 8.72E+06 | parkin null-Rep II |
| gil8647   | FBgn0003462 | 631.86 | 1261.71 | 1261.7  | 0     | 0 | 76 | 2.30E-07 | 1 | ITLFGADSIIGR           | 1.01E+07 | parkin null-Rep I  |
| gil8647   | FBgn0003462 | 631.86 | 1261.71 | 1261.7  | 0     | 0 | 67 | 2.10E-06 | 1 | ITLFGADSIIGR           | 1.15E+07 | control-Rep I      |
| gil8647   | FBgn0003462 | 510.27 | 1018.53 | 1018.51 | 0.01  | 0 | 38 | 0.0057   | 1 | VSGEVCGLAK             | 1.45E+06 | parkin null-Rep II |
| gil8647   | FBgn0003462 | 510.26 | 1018.51 | 1018.51 | -0.01 | 0 | 40 | 0.0036   | 1 | VSGEVCGLAK             | 2.39E+06 | parkin null-Rep I  |
| gil8647   | FBgn0003462 | 510.26 | 1018.51 | 1018.51 | -0.01 | 0 | 37 | 0.0068   | 1 | VSGEVCGLAK             | 3.13E+06 | control-Rep II     |
| gil8647   | FBgn0003462 | 510.26 | 1018.51 | 1018.51 | 0     | 0 | 38 | 0.0029   | 1 | VSGEVCGLAK             | 3.60E+06 | control-Rep I      |
| gil103399 | FBgn0003470 | 430.21 | 1287.61 | 1287.61 | 0     | 0 | 30 | 0.017    | 1 | EHYAAAEIQEK            | 4.67E+05 | parkin null-Rep II |
| gil103399 | FBgn0003470 | 430.21 | 1287.61 | 1287.61 | 0     | 0 | 22 | 0.068    | 1 | EHYAAAEIQEK            | 5.71E+05 | parkin null-Rep I  |
| gil103399 | FBgn0003470 | 430.21 | 1287.61 | 1287.61 | 0     | 0 | 30 | 0.014    | 1 | EHYAAAEIQEK            | 6.01E+05 | control-Rep II     |
| gil103399 | FBgn0003470 | 430.21 | 1287.61 | 1287.61 | 0     | 0 | 22 | 0.094    | 1 | EHYAAAEIQEK            | 8.20E+05 | control-Rep I      |
| gil103399 | FBgn0003470 | 535.93 | 1604.77 | 1604.77 | 0     | 0 | 68 | 1.50E-06 | 1 | HALLEADVMAHQDR         | 2.19E+06 | parkin null-Rep II |
| gil103399 | FBgn0003470 | 535.93 | 1604.77 | 1604.77 | 0     | 0 | 58 | 1.70E-05 | 1 | HALLEADVMAHQDR         | 2.67E+06 | parkin null-Rep I  |
| gil103399 | FBgn0003470 | 535.93 | 1604.77 | 1604.77 | -0.01 | 0 | 74 | 3.70E-07 | 1 | HALLEADVMAHQDR         | 4.64E+06 | control-Rep I      |

|           |             |         |         |         |       |   |    |          |   |                           |          |                    |
|-----------|-------------|---------|---------|---------|-------|---|----|----------|---|---------------------------|----------|--------------------|
| gil103399 | FBgn0003470 | 514.92  | 1541.74 | 1541.72 | 0.02  | 0 | 27 | 0.019    | 1 | HQAFEAEELANADR            | 3.68E+06 | parkin null-Rep I  |
| gil103399 | FBgn0003470 | 514.91  | 1541.72 | 1541.72 | 0     | 0 | 22 | 0.062    | 1 | HQAFEAEELANADR            | 4.92E+06 | control-Rep I      |
| gil103399 | FBgn0003470 | 771.87  | 1541.73 | 1541.72 | 0     | 0 | 24 | 0.037    | 1 | HQAFEAEELANADR            | 5.58E+06 | control-Rep II     |
| gil103399 | FBgn0003470 | 909.15  | 2724.43 | 2724.41 | 0.02  | 0 | 37 | 0.002    | 1 | IAALQTVADQLIAQNHYASNLVDEK | 1.31E+07 | parkin null-Rep I  |
| gil103399 | FBgn0003470 | 909.15  | 2724.43 | 2724.41 | 0.02  | 0 | 59 | 1.40E-05 | 1 | IAALQTVADQLIAQNHYASNLVDEK | 1.36E+07 | control-Rep II     |
| gil103399 | FBgn0003470 | 909.15  | 2724.43 | 2724.41 | 0.02  | 0 | 61 | 8.00E-06 | 1 | IAALQTVADQLIAQNHYASNLVDEK | 1.37E+07 | parkin null-Rep II |
| gil103399 | FBgn0003470 | 909.15  | 2724.42 | 2724.41 | 0.01  | 0 | 52 | 7.20E-05 | 1 | IAALQTVADQLIAQNHYASNLVDEK | 1.43E+07 | control-Rep I      |
| gil103399 | FBgn0003470 | 587.31  | 1758.91 | 1758.9  | 0.01  | 1 | 58 | 5.80E-05 | 1 | KHQLVEADIVAHEDR           | 7.66E+05 | parkin null-Rep II |
| gil103399 | FBgn0003470 | 587.31  | 1758.91 | 1758.9  | 0.01  | 1 | 32 | 0.021    | 1 | KHQLVEADIVAHEDR           | 1.29E+06 | control-Rep II     |
| gil103399 | FBgn0003470 | 587.31  | 1758.9  | 1758.9  | 0     | 1 | 42 | 0.00097  | 1 | KHQLVEADIVAHEDR           | 1.42E+06 | parkin null-Rep I  |
| gil103399 | FBgn0003470 | 587.31  | 1758.91 | 1758.9  | 0.01  | 1 | 38 | 0.0061   | 1 | KHQLVEADIVAHEDR           | 1.44E+06 | control-Rep I      |
| gil103399 | FBgn0003470 | 517.91  | 1550.71 | 1550.73 | -0.02 | 0 | 27 | 0.017    | 1 | LCSIHADHSDQIR             | 4.54E+05 | control-Rep II     |
| gil103399 | FBgn0003470 | 517.92  | 1550.72 | 1550.73 | 0     | 0 | 22 | 0.071    | 1 | LCSIHADHSDQIR             | 4.63E+05 | parkin null-Rep II |
| gil103399 | FBgn0003470 | 517.92  | 1550.73 | 1550.73 | 0     | 0 | 26 | 0.024    | 1 | LCSIHADHSDQIR             | 7.34E+05 | parkin null-Rep I  |
| gil103399 | FBgn0003470 | 517.92  | 1550.72 | 1550.73 | 0     | 0 | 37 | 0.0018   | 1 | LCSIHADHSDQIR             | 9.11E+05 | control-Rep I      |
| gil103399 | FBgn0003470 | 709.39  | 1416.76 | 1416.76 | 0     | 0 | 59 | 1.80E-05 | 1 | LLNVISSGENMLK             | 9.36E+06 | parkin null-Rep II |
| gil103399 | FBgn0003470 | 709.39  | 1416.77 | 1416.76 | 0     | 0 | 36 | 0.0064   | 1 | LLNVISSGENMLK             | 1.08E+07 | control-Rep I      |
| gil103399 | FBgn0003470 | 709.39  | 1416.77 | 1416.76 | 0     | 0 | 45 | 0.00045  | 1 | LLNVISSGENMLK             | 1.13E+07 | parkin null-Rep I  |
| gil136075 | FBgn0003721 | 743.39  | 1484.77 | 1484.76 | 0.01  | 0 | 23 | 0.073    | 1 | ALQNAESEVAALNR            | 2.11E+07 | parkin null-Rep I  |
| gil136075 | FBgn0003721 | 743.39  | 1484.77 | 1484.76 | 0.01  | 0 | 30 | 0.023    | 1 | ALQNAESEVAALNR            | 2.14E+07 | parkin null-Rep II |
| gil136075 | FBgn0003721 | 743.39  | 1484.77 | 1484.76 | 0.01  | 0 | 31 | 0.021    | 1 | ALQNAESEVAALNR            | 2.72E+07 | control-Rep I      |
| gil136075 | FBgn0003721 | 629.33  | 1256.65 | 1256.66 | -0.01 | 0 | 37 | 0.0027   | 1 | IQLLEEDLER                | 4.00E+06 | parkin null-Rep II |
| gil136075 | FBgn0003721 | 629.34  | 1256.67 | 1256.66 | 0     | 0 | 35 | 0.0095   | 1 | IQLLEEDLER                | 5.63E+06 | parkin null-Rep I  |
| gil136075 | FBgn0003721 | 629.34  | 1256.66 | 1256.66 | 0     | 0 | 32 | 0.011    | 1 | IQLLEEDLER                | 5.81E+06 | control-Rep II     |
| gil136075 | FBgn0003721 | 629.34  | 1256.66 | 1256.66 | 0     | 0 | 34 | 0.0058   | 1 | IQLLEEDLER                | 6.29E+06 | control-Rep I      |
| gil136075 | FBgn0003721 | 1165.62 | 2329.22 | 2329.2  | 0.02  | 0 | 90 | 1.30E-08 | 1 | IQTVENELDQTQEALTLVTGK     | 1.95E+07 | control-Rep II     |
| gil136075 | FBgn0003721 | 1165.62 | 2329.23 | 2329.2  | 0.03  | 0 | 98 | 2.10E-09 | 1 | IQTVENELDQTQEALTLVTGK     | 2.14E+07 | parkin null-Rep II |
| gil136075 | FBgn0003721 | 1165.62 | 2329.22 | 2329.2  | 0.02  | 0 | 85 | 4.10E-08 | 1 | IQTVENELDQTQEALTLVTGK     | 3.48E+07 | control-Rep I      |
| gil136075 | FBgn0003721 | 565.31  | 1128.61 | 1128.6  | 0     | 0 | 57 | 3.90E-05 | 1 | IVELEELR                  | 4.89E+07 | parkin null-Rep II |
| gil136075 | FBgn0003721 | 565.31  | 1128.6  | 1128.6  | 0     | 0 | 56 | 4.40E-05 | 1 | IVELEELR                  | 6.02E+07 | control-Rep II     |
| gil136075 | FBgn0003721 | 565.31  | 1128.6  | 1128.6  | 0     | 0 | 53 | 0.0001   | 1 | IVELEELR                  | 6.60E+07 | parkin null-Rep I  |
| gil136075 | FBgn0003721 | 565.31  | 1128.6  | 1128.6  | 0     | 0 | 53 | 9.90E-05 | 1 | IVELEELR                  | 9.53E+07 | control-Rep I      |
| gil136075 | FBgn0003721 | 820.11  | 2457.3  | 2457.3  | 0     | 1 | 35 | 0.0031   | 1 | KIQTVENELDQTQEALTLVTGK    | 1.96E+07 | parkin null-Rep II |
| gil136075 | FBgn0003721 | 820.11  | 2457.3  | 2457.3  | 0     | 1 | 25 | 0.031    | 1 | KIQTVENELDQTQEALTLVTGK    | 2.15E+07 | parkin null-Rep I  |
| gil136075 | FBgn0003721 | 820.11  | 2457.31 | 2457.3  | 0.02  | 1 | 39 | 0.0011   | 1 | KIQTVENELDQTQEALTLVTGK    | 2.39E+07 | control-Rep II     |
| gil136075 | FBgn0003721 | 820.11  | 2457.3  | 2457.3  | 0.01  | 1 | 42 | 0.0006   | 1 | KIQTVENELDQTQEALTLVTGK    | 2.72E+07 | control-Rep I      |
| gil136075 | FBgn0003721 | 637.84  | 1273.67 | 1273.67 | 0     | 1 | 59 | 2.10E-05 | 1 | KLAMVEADLER               | 3.57E+06 | parkin null-Rep II |
| gil136075 | FBgn0003721 | 637.84  | 1273.67 | 1273.67 | 0     | 1 | 46 | 0.00049  | 1 | KLAMVEADLER               | 4.96E+06 | parkin null-Rep I  |
| gil136075 | FBgn0003721 | 637.84  | 1273.67 | 1273.67 | 0     | 1 | 61 | 1.30E-05 | 1 | KLAMVEADLER               | 5.39E+06 | control-Rep II     |



|             |             |        |         |         |       |   |    |          |   |                            |          |                    |
|-------------|-------------|--------|---------|---------|-------|---|----|----------|---|----------------------------|----------|--------------------|
| gij136075   | FBgn0003721 | 637.84 | 1273.67 | 1273.67 | 0     | 1 | 61 | 1.60E-05 | 1 | KLAMVEADLER                | 7.48E+06 | control-Rep I      |
| gij136075   | FBgn0003721 | 573.8  | 1145.58 | 1145.58 | 0     | 0 | 49 | 0.0002   | 1 | LAMVEADLER                 | 2.04E+07 | parkin null-Rep II |
| gij136075   | FBgn0003721 | 573.8  | 1145.59 | 1145.58 | 0.01  | 0 | 48 | 0.00029  | 1 | LAMVEADLER                 | 2.49E+07 | parkin null-Rep I  |
| gij136075   | FBgn0003721 | 573.79 | 1145.58 | 1145.58 | 0     | 0 | 46 | 0.00042  | 1 | LAMVEADLER                 | 2.84E+07 | control-Rep II     |
| gij136075   | FBgn0003721 | 573.8  | 1145.58 | 1145.58 | 0     | 0 | 50 | 0.00018  | 1 | LAMVEADLER                 | 4.03E+07 | control-Rep I      |
| gij136075   | FBgn0003721 | 696.82 | 1391.62 | 1391.62 | 0     | 0 | 70 | 6.90E-07 | 1 | LSEASQAADESER              | 2.96E+06 | parkin null-Rep I  |
| gij136075   | FBgn0003721 | 696.81 | 1391.61 | 1391.62 | 0     | 0 | 70 | 6.40E-07 | 1 | LSEASQAADESER              | 2.96E+06 | parkin null-Rep II |
| gij136075   | FBgn0003721 | 696.82 | 1391.62 | 1391.62 | 0.01  | 0 | 73 | 3.80E-07 | 1 | LSEASQAADESER              | 5.04E+06 | control-Rep II     |
| gij136075   | FBgn0003721 | 696.82 | 1391.62 | 1391.62 | 0     | 0 | 70 | 6.90E-07 | 1 | LSEASQAADESER              | 5.35E+06 | control-Rep I      |
| gij13184376 | FBgn0003738 | 682.36 | 1362.71 | 1362.7  | 0     | 0 | 46 | 0.00073  | 1 | AIFGESDALIAEK              | 9.19E+06 | control-Rep II     |
| gij13184376 | FBgn0003738 | 682.36 | 1362.71 | 1362.7  | 0     | 0 | 44 | 0.0011   | 1 | AIFGESDALIAEK              | 1.21E+07 | control-Rep I      |
| gij13184376 | FBgn0003738 | 682.36 | 1362.7  | 1362.7  | 0     | 0 | 44 | 0.00056  | 1 | AIFGESDALIAEK              | 1.33E+07 | parkin null-Rep II |
| gij13184376 | FBgn0003738 | 640.34 | 1278.66 | 1278.66 | 0     | 0 | 67 | 3.70E-06 | 1 | IQYGGSVTAANAK              | 3.34E+06 | parkin null-Rep II |
| gij13184376 | FBgn0003738 | 640.34 | 1278.66 | 1278.66 | 0     | 0 | 64 | 6.70E-06 | 1 | IQYGGSVTAANAK              | 4.61E+06 | parkin null-Rep I  |
| gij13184376 | FBgn0003738 | 640.33 | 1278.65 | 1278.66 | 0     | 0 | 66 | 4.40E-06 | 1 | IQYGGSVTAANAK              | 5.20E+06 | control-Rep II     |
| gij13184376 | FBgn0003738 | 640.33 | 1278.65 | 1278.66 | -0.01 | 0 | 57 | 3.00E-05 | 1 | IQYGGSVTAANAK              | 6.02E+06 | control-Rep I      |
| gij13184376 | FBgn0003738 | 891.16 | 2670.46 | 2670.44 | 0.02  | 0 | 64 | 2.50E-06 | 1 | KPDIIDGFLVGGASLKPEFVDIINAR | 3.13E+06 | control-Rep II     |
| gij13184376 | FBgn0003738 | 891.16 | 2670.46 | 2670.44 | 0.02  | 0 | 44 | 0.00025  | 1 | KPDIIDGFLVGGASLKPEFVDIINAR | 4.95E+06 | control-Rep I      |
| gij13184376 | FBgn0003738 | 891.16 | 2670.46 | 2670.44 | 0.02  | 0 | 37 | 0.0011   | 1 | KPDIIDGFLVGGASLKPEFVDIINAR | 5.17E+06 | parkin null-Rep II |
| gij13184376 | FBgn0003738 | 851.97 | 1701.92 | 1701.91 | 0.01  | 0 | 66 | 3.30E-06 | 1 | NVVVAYEPVVAIGTGK           | 1.65E+07 | control-Rep II     |
| gij13184376 | FBgn0003738 | 851.97 | 1701.92 | 1701.91 | 0.01  | 0 | 74 | 5.60E-07 | 1 | NVVVAYEPVVAIGTGK           | 1.77E+07 | parkin null-Rep II |
| gij13184376 | FBgn0003738 | 851.97 | 1701.92 | 1701.91 | 0.01  | 0 | 77 | 2.30E-07 | 1 | NVVVAYEPVVAIGTGK           | 1.81E+07 | control-Rep I      |
| gij13184376 | FBgn0003738 | 851.97 | 1701.92 | 1701.91 | 0.01  | 0 | 63 | 6.50E-06 | 1 | NVVVAYEPVVAIGTGK           | 1.90E+07 | parkin null-Rep I  |
| gij28573700 | FBgn0003887 | 846.44 | 1690.87 | 1690.86 | 0.01  | 0 | 68 | 2.90E-06 | 1 | ALTVPELTQQMFDK             | 8.30E+07 | parkin null-Rep II |
| gij28573700 | FBgn0003887 | 846.44 | 1690.87 | 1690.86 | 0.01  | 0 | 63 | 8.30E-06 | 1 | ALTVPELTQQMFDK             | 9.58E+07 | parkin null-Rep I  |
| gij28573700 | FBgn0003887 | 846.44 | 1690.87 | 1690.86 | 0.01  | 0 | 70 | 1.80E-06 | 1 | ALTVPELTQQMFDK             | 9.96E+07 | control-Rep I      |
| gij28573700 | FBgn0003887 | 846.44 | 1690.86 | 1690.86 | 0     | 0 | 48 | 0.00026  | 1 | ALTVPELTQQMFDK             | 1.00E+08 | control-Rep II     |
| gij542543   | FBgn0003887 | 608.31 | 1821.91 | 1821.92 | 0     | 0 | 46 | 0.0005   | 1 | EIVHIQAGQCQNIGAK           | 6.17E+06 | parkin null-Rep II |
| gij542543   | FBgn0003887 | 608.31 | 1821.92 | 1821.92 | 0     | 0 | 35 | 0.0065   | 1 | EIVHIQAGQCQNIGAK           | 8.61E+06 | parkin null-Rep I  |
| gij542543   | FBgn0003887 | 608.31 | 1821.92 | 1821.92 | 0     | 0 | 46 | 0.00049  | 1 | EIVHIQAGQCQNIGAK           | 1.03E+07 | control-Rep II     |
| gij542543   | FBgn0003887 | 608.31 | 1821.92 | 1821.92 | 0.01  | 0 | 52 | 0.00013  | 1 | EIVHIQAGQCQNIGAK           | 1.23E+07 | control-Rep I      |
| gij28573700 | FBgn0003887 | 917.48 | 2749.41 | 2749.38 | 0.03  | 0 | 45 | 0.00031  | 1 | LTPTYGDLNHLVSLTMSGVTTCLR   | 3.26E+07 | parkin null-Rep I  |
| gij28573700 | FBgn0003887 | 917.48 | 2749.41 | 2749.38 | 0.03  | 0 | 41 | 0.0009   | 1 | LTPTYGDLNHLVSLTMSGVTTCLR   | 3.92E+07 | parkin null-Rep II |
| gij28573700 | FBgn0003887 | 917.47 | 2749.38 | 2749.38 | 0     | 0 | 48 | 0.0002   | 1 | LTPTYGDLNHLVSLTMSGVTTCLR   | 4.06E+07 | control-Rep II     |
| gij28573700 | FBgn0003887 | 917.47 | 2749.39 | 2749.38 | 0.01  | 0 | 51 | 0.0001   | 1 | LTPTYGDLNHLVSLTMSGVTTCLR   | 4.37E+07 | control-Rep I      |
| gij28573700 | FBgn0003887 | 848.92 | 1695.83 | 1695.83 | 0.01  | 0 | 58 | 1.50E-05 | 1 | NSSYFVWIPNNVK              | 4.56E+07 | parkin null-Rep II |
| gij28573700 | FBgn0003887 | 848.93 | 1695.84 | 1695.83 | 0.02  | 0 | 62 | 6.30E-06 | 1 | NSSYFVWIPNNVK              | 5.30E+07 | control-Rep II     |
| gij28573700 | FBgn0003887 | 848.93 | 1695.84 | 1695.83 | 0.01  | 0 | 53 | 4.80E-05 | 1 | NSSYFVWIPNNVK              | 5.47E+07 | parkin null-Rep I  |
| gij28573700 | FBgn0003887 | 848.92 | 1695.83 | 1695.83 | 0     | 0 | 50 | 9.30E-05 | 1 | NSSYFVWIPNNVK              | 5.99E+07 | control-Rep I      |

|             |             |        |         |         |       |   |    |          |   |                            |          |                    |
|-------------|-------------|--------|---------|---------|-------|---|----|----------|---|----------------------------|----------|--------------------|
| gij28573700 | FBgn0003887 | 933.46 | 2797.36 | 2797.34 | 0.02  | 0 | 80 | 8.00E-08 | 1 | SGPFGQIFRPDNFVFGQSGAGNNWAK | 4.61E+07 | parkin null-Rep II |
| gij28573700 | FBgn0003887 | 933.46 | 2797.36 | 2797.34 | 0.02  | 0 | 84 | 3.00E-08 | 1 | SGPFGQIFRPDNFVFGQSGAGNNWAK | 4.76E+07 | parkin null-Rep I  |
| gij28573700 | FBgn0003887 | 933.46 | 2797.35 | 2797.34 | 0.01  | 0 | 79 | 8.60E-08 | 1 | SGPFGQIFRPDNFVFGQSGAGNNWAK | 5.78E+07 | control-Rep II     |
| gij28573700 | FBgn0003887 | 933.45 | 2797.34 | 2797.34 | 0     | 0 | 73 | 2.90E-07 | 1 | SGPFGQIFRPDNFVFGQSGAGNNWAK | 5.85E+07 | control-Rep I      |
| gij28573700 | FBgn0003887 | 527.31 | 1052.61 | 1052.6  | 0     | 0 | 60 | 1.30E-05 | 1 | YLTVAAI FR                 | 7.20E+06 | control-Rep II     |
| gij28573700 | FBgn0003887 | 527.31 | 1052.61 | 1052.6  | 0     | 0 | 44 | 0.00053  | 1 | YLTVAAI FR                 | 7.82E+06 | control-Rep I      |
| gij28573700 | FBgn0003887 | 527.31 | 1052.61 | 1052.6  | 0     | 0 | 44 | 0.00054  | 1 | YLTVAAI FR                 | 8.93E+06 | parkin null-Rep I  |
| gij28573700 | FBgn0003887 | 527.31 | 1052.61 | 1052.6  | 0     | 0 | 55 | 4.40E-05 | 1 | YLTVAAI FR                 | 9.05E+06 | parkin null-Rep II |
| gij38570289 | FBgn0004028 | 856.92 | 1711.83 | 1711.85 | -0.02 | 0 | 58 | 1.70E-05 | 1 | AQEINDLNAQVNDLR            | 4.80E+06 | parkin null-Rep I  |
| gij38570289 | FBgn0004028 | 856.93 | 1711.85 | 1711.85 | 0     | 0 | 88 | 2.50E-08 | 1 | AQEINDLNAQVNDLR            | 5.47E+06 | control-Rep I      |
| gij24642953 | FBgn0004028 | 705.84 | 1409.66 | 1409.66 | 0     | 1 | 29 | 0.0076   | 1 | EFTLEEEKEK                 | 2.12E+06 | parkin null-Rep II |
| gij38570289 | FBgn0004028 | 705.84 | 1409.66 | 1409.66 | 0.01  | 1 | 28 | 0.01     | 1 | EFTLEEEKEK                 | 2.84E+06 | parkin null-Rep I  |
| gij38570289 | FBgn0004028 | 705.84 | 1409.66 | 1409.66 | 0.01  | 1 | 36 | 0.002    | 1 | EFTLEEEKEK                 | 3.54E+06 | control-Rep II     |
| gij38570289 | FBgn0004028 | 839.9  | 1677.79 | 1677.79 | 0     | 0 | 59 | 1.10E-05 | 1 | NLSDASEAELQTICK            | 4.48E+06 | control-Rep II     |
| gij38570289 | FBgn0004028 | 839.9  | 1677.79 | 1677.79 | 0     | 0 | 55 | 3.00E-05 | 1 | NLSDASEAELQTICK            | 5.07E+06 | control-Rep I      |
| gij24642953 | FBgn0004028 | 502.25 | 1002.49 | 1002.49 | 0     | 1 | 36 | 0.0075   | 1 | VKEEVEAEA                  | 3.96E+05 | control-Rep I      |
| gij24642953 | FBgn0004028 | 502.25 | 1002.49 | 1002.49 | 0     | 1 | 32 | 0.017    | 1 | VKEEVEAEA                  | 5.14E+05 | parkin null-Rep II |
| gij24642953 | FBgn0004028 | 502.25 | 1002.49 | 1002.49 | 0     | 1 | 28 | 0.042    | 1 | VKEEVEAEA                  | 6.52E+05 | parkin null-Rep I  |
| gij24642953 | FBgn0004028 | 502.25 | 1002.49 | 1002.49 | 0     | 1 | 33 | 0.014    | 1 | VKEEVEAEA                  | 6.60E+05 | control-Rep II     |
| gij28571726 | FBgn0004117 | 567.29 | 1132.57 | 1132.57 | 0     | 0 | 28 | 0.056    | 1 | IMELEELK                   | 1.97E+07 | parkin null-Rep II |
| gij28571726 | FBgn0004117 | 567.29 | 1132.57 | 1132.57 | 0     | 0 | 21 | 0.26     | 1 | IMELEELK                   | 2.29E+07 | parkin null-Rep I  |
| gij28571726 | FBgn0004117 | 567.29 | 1132.57 | 1132.57 | 0.01  | 0 | 35 | 0.0058   | 1 | IMELEELK                   | 2.33E+07 | control-Rep II     |
| gij28571726 | FBgn0004117 | 881.94 | 1761.87 | 1761.88 | -0.01 | 1 | 52 | 8.20E-05 | 1 | KLAFVEDELEVAEDR            | 1.49E+06 | control-Rep I      |
| gij28571726 | FBgn0004117 | 881.95 | 1761.89 | 1761.88 | 0.01  | 1 | 58 | 2.50E-05 | 1 | KLAFVEDELEVAEDR            | 4.77E+06 | control-Rep II     |
| gij28571726 | FBgn0004117 | 881.94 | 1761.87 | 1761.88 | 0     | 1 | 31 | 0.012    | 1 | KLAFVEDELEVAEDR            | 5.85E+06 | parkin null-Rep II |
| gij28571726 | FBgn0004117 | 730.85 | 1459.69 | 1459.69 | 0     | 0 | 74 | 3.90E-07 | 1 | LLEATQSADENNR              | 8.65E+06 | parkin null-Rep II |
| gij28571726 | FBgn0004117 | 730.85 | 1459.69 | 1459.69 | 0     | 0 | 75 | 3.20E-07 | 1 | LLEATQSADENNR              | 1.12E+07 | parkin null-Rep I  |
| gij28571726 | FBgn0004117 | 730.85 | 1459.69 | 1459.69 | 0     | 0 | 83 | 4.50E-08 | 1 | LLEATQSADENNR              | 1.36E+07 | control-Rep II     |
| gij28571726 | FBgn0004117 | 730.85 | 1459.69 | 1459.69 | 0     | 0 | 70 | 9.70E-07 | 1 | LLEATQSADENNR              | 1.57E+07 | control-Rep I      |
| gij28571726 | FBgn0004117 | 766.9  | 1531.79 | 1531.78 | 0     | 0 | 87 | 3.30E-08 | 1 | LLTATESEVATQNR             | 2.86E+07 | parkin null-Rep II |
| gij28571726 | FBgn0004117 | 766.89 | 1531.77 | 1531.78 | -0.01 | 0 | 80 | 1.50E-07 | 1 | LLTATESEVATQNR             | 3.36E+07 | parkin null-Rep I  |
| gij28571726 | FBgn0004117 | 766.9  | 1531.78 | 1531.78 | 0     | 0 | 84 | 5.40E-08 | 1 | LLTATESEVATQNR             | 4.04E+07 | control-Rep II     |
| gij28571726 | FBgn0004117 | 766.9  | 1531.78 | 1531.78 | 0     | 0 | 84 | 6.20E-08 | 1 | LLTATESEVATQNR             | 4.66E+07 | control-Rep I      |
| gij28571726 | FBgn0004117 | 860.38 | 1718.74 | 1718.73 | 0.01  | 0 | 82 | 1.60E-08 | 1 | SLADEMDSTFAELAGY           | 1.45E+07 | parkin null-Rep II |
| gij28571726 | FBgn0004117 | 860.38 | 1718.75 | 1718.73 | 0.01  | 0 | 82 | 1.90E-08 | 1 | SLADEMDSTFAELAGY           | 1.69E+07 | parkin null-Rep I  |
| gij28571726 | FBgn0004117 | 860.38 | 1718.74 | 1718.73 | 0.01  | 0 | 81 | 2.10E-08 | 1 | SLADEMDSTFAELAGY           | 1.87E+07 | control-Rep I      |
| gij28571726 | FBgn0004117 | 860.38 | 1718.74 | 1718.73 | 0.01  | 0 | 90 | 2.80E-09 | 1 | SLADEMDSTFAELAGY           | 2.07E+07 | control-Rep II     |
| gij103432   | FBgn0004169 | 614.85 | 1227.69 | 1227.69 | 0     | 0 | 51 | 0.00015  | 1 | AQELWELIVK                 | 2.74E+07 | parkin null-Rep I  |
| gij103432   | FBgn0004169 | 614.85 | 1227.69 | 1227.69 | 0     | 0 | 53 | 8.60E-05 | 1 | AQELWELIVK                 | 3.09E+07 | parkin null-Rep II |

|             |             |         |         |         |       |   |     |          |   |                       |          |                    |
|-------------|-------------|---------|---------|---------|-------|---|-----|----------|---|-----------------------|----------|--------------------|
| gil103432   | FBgn0004169 | 614.86  | 1227.7  | 1227.69 | 0.01  | 0 | 51  | 0.00013  | 1 | AQELWELIVK            | 3.37E+07 | control-Rep II     |
| gil103432   | FBgn0004169 | 614.85  | 1227.69 | 1227.69 | 0     | 0 | 56  | 4.30E-05 | 1 | AQELWELIVK            | 4.89E+07 | control-Rep I      |
| gil103432   | FBgn0004169 | 688.85  | 1375.69 | 1375.68 | 0.01  | 0 | 73  | 8.10E-07 | 1 | DAGVLGLSSAAMER        | 1.42E+07 | parkin null-Rep I  |
| gil103432   | FBgn0004169 | 688.85  | 1375.68 | 1375.68 | 0     | 0 | 67  | 2.50E-06 | 1 | DAGVLGLSSAAMER        | 1.59E+07 | control-Rep II     |
| gil103432   | FBgn0004169 | 688.84  | 1375.68 | 1375.68 | 0     | 0 | 68  | 2.50E-06 | 1 | DAGVLGLSSAAMER        | 1.76E+07 | parkin null-Rep II |
| gil103432   | FBgn0004169 | 688.85  | 1375.68 | 1375.68 | 0     | 0 | 66  | 3.50E-06 | 1 | DAGVLGLSSAAMER        | 2.09E+07 | control-Rep I      |
| gil103432   | FBgn0004169 | 475.57  | 1423.69 | 1423.68 | 0.01  | 1 | 22  | 0.078    | 1 | LETEKYDLEER           | 1.42E+06 | parkin null-Rep II |
| gil103432   | FBgn0004169 | 475.57  | 1423.67 | 1423.68 | -0.01 | 1 | 25  | 0.029    | 1 | LETEKYDLEER           | 2.49E+06 | control-Rep I      |
| gil103432   | FBgn0004169 | 640.81  | 1279.61 | 1279.61 | 0     | 0 | 59  | 1.20E-05 | 1 | LFEGGWDEISK           | 2.17E+07 | parkin null-Rep I  |
| gil103432   | FBgn0004169 | 640.81  | 1279.61 | 1279.61 | 0.01  | 0 | 62  | 6.30E-06 | 1 | LFEGGWDEISK           | 2.67E+07 | control-Rep II     |
| gil103432   | FBgn0004169 | 640.81  | 1279.61 | 1279.61 | 0     | 0 | 56  | 2.10E-05 | 1 | LFEGGWDEISK           | 2.88E+07 | parkin null-Rep II |
| gil103432   | FBgn0004169 | 640.81  | 1279.61 | 1279.61 | 0     | 0 | 59  | 1.20E-05 | 1 | LFEGGWDEISK           | 3.03E+07 | control-Rep I      |
| gil103432   | FBgn0004169 | 927.44  | 1852.87 | 1852.85 | 0.02  | 1 | 33  | 0.0073   | 1 | LFEGGWDEISKDSNEK      | 7.70E+05 | parkin null-Rep II |
| gil103432   | FBgn0004169 | 927.44  | 1852.87 | 1852.85 | 0.02  | 1 | 52  | 0.0001   | 1 | LFEGGWDEISKDSNEK      | 1.70E+06 | control-Rep II     |
| gil19550069 | FBgn0004363 | 545.28  | 1088.55 | 1088.53 | 0.01  | 0 | 32  | 0.02     | 1 | ADSDVNIDLK            | 1.01E+07 | parkin null-Rep II |
| gil19550069 | FBgn0004363 | 545.27  | 1088.53 | 1088.53 | 0     | 0 | 24  | 0.071    | 1 | ADSDVNIDLK            | 1.21E+07 | parkin null-Rep I  |
| gil19550069 | FBgn0004363 | 545.27  | 1088.53 | 1088.53 | 0     | 0 | 25  | 0.048    | 1 | ADSDVNIDLK            | 1.52E+07 | control-Rep II     |
| gil19550069 | FBgn0004363 | 545.27  | 1088.53 | 1088.53 | 0     | 0 | 27  | 0.032    | 1 | ADSDVNIDLK            | 2.07E+07 | control-Rep I      |
| gil19550069 | FBgn0004363 | 650.96  | 1949.87 | 1949.87 | 0     | 0 | 32  | 0.0023   | 1 | TSSGIEFNTAGHSNQESGK   | 9.09E+06 | parkin null-Rep II |
| gil19550069 | FBgn0004363 | 650.96  | 1949.87 | 1949.87 | 0     | 0 | 34  | 0.0015   | 1 | TSSGIEFNTAGHSNQESGK   | 1.11E+07 | parkin null-Rep I  |
| gil19550069 | FBgn0004363 | 650.96  | 1949.87 | 1949.87 | 0     | 0 | 40  | 0.0003   | 1 | TSSGIEFNTAGHSNQESGK   | 1.34E+07 | control-Rep II     |
| gil19550069 | FBgn0004363 | 650.96  | 1949.87 | 1949.87 | 0     | 0 | 31  | 0.0029   | 1 | TSSGIEFNTAGHSNQESGK   | 1.37E+07 | control-Rep I      |
| gil19550069 | FBgn0004363 | 753.39  | 1504.76 | 1504.76 | 0     | 0 | 95  | 6.20E-09 | 1 | VNNASQVGLGYQQK        | 5.07E+06 | parkin null-Rep II |
| gil19550069 | FBgn0004363 | 753.39  | 1504.77 | 1504.76 | 0     | 0 | 77  | 3.00E-07 | 1 | VNNASQVGLGYQQK        | 7.54E+06 | parkin null-Rep I  |
| gil19550069 | FBgn0004363 | 753.39  | 1504.76 | 1504.76 | 0     | 0 | 90  | 1.70E-08 | 1 | VNNASQVGLGYQQK        | 7.70E+06 | control-Rep II     |
| gil19550069 | FBgn0004363 | 753.39  | 1504.76 | 1504.76 | 0     | 0 | 76  | 4.70E-07 | 1 | VNNASQVGLGYQQK        | 1.09E+07 | control-Rep I      |
| gil19550069 | FBgn0004363 | 1267.65 | 2533.29 | 2533.27 | 0.02  | 0 | 109 | 2.60E-10 | 1 | WNTDNTLFTEVAVQDQLEGLK | 6.60E+05 | parkin null-Rep II |
| gil19550069 | FBgn0004363 | 1267.65 | 2533.29 | 2533.27 | 0.02  | 0 | 81  | 1.70E-07 | 1 | WNTDNTLFTEVAVQDQLEGLK | 9.06E+05 | control-Rep I      |
| gil19550069 | FBgn0004363 | 1267.66 | 2533.31 | 2533.27 | 0.04  | 0 | 73  | 8.60E-07 | 1 | WNTDNTLFTEVAVQDQLEGLK | 1.15E+06 | parkin null-Rep I  |
| gil19550069 | FBgn0004363 | 591.27  | 1180.54 | 1180.54 | 0     | 0 | 59  | 1.10E-05 | 1 | YQLDDASVR             | 1.49E+07 | parkin null-Rep II |
| gil19550069 | FBgn0004363 | 591.27  | 1180.53 | 1180.54 | 0     | 0 | 46  | 0.0002   | 1 | YQLDDASVR             | 1.98E+07 | parkin null-Rep I  |
| gil19550069 | FBgn0004363 | 591.27  | 1180.53 | 1180.54 | 0     | 0 | 49  | 9.50E-05 | 1 | YQLDDASVR             | 2.19E+07 | control-Rep II     |
| gil19550069 | FBgn0004363 | 591.27  | 1180.53 | 1180.54 | 0     | 0 | 54  | 2.50E-05 | 1 | YQLDDASVR             | 2.38E+07 | control-Rep I      |
| gil45549139 | FBgn0004432 | 813.46  | 1624.91 | 1624.88 | 0.02  | 0 | 73  | 7.60E-07 | 1 | HVVFGEVVEGLDVVK       | 4.32E+06 | control-Rep II     |
| gil118099   | FBgn0004432 | 813.45  | 1624.89 | 1624.88 | 0     | 0 | 61  | 1.70E-05 | 1 | HVVFGEVVEGLDVVK       | 4.38E+06 | parkin null-Rep II |
| gil118099   | FBgn0004432 | 813.45  | 1624.89 | 1624.88 | 0     | 0 | 79  | 2.20E-07 | 1 | HVVFGEVVEGLDVVK       | 6.23E+06 | parkin null-Rep I  |
| gil118099   | FBgn0004432 | 813.45  | 1624.89 | 1624.88 | 0     | 0 | 61  | 1.60E-05 | 1 | HVVFGEVVEGLDVVK       | 8.71E+06 | control-Rep I      |
| gil118099   | FBgn0004432 | 501.3   | 1000.59 | 1000.59 | -0.01 | 1 | 32  | 0.013    | 1 | KIIVANS GSL           | 1.49E+06 | parkin null-Rep II |
| gil45549139 | FBgn0004432 | 501.3   | 1000.59 | 1000.59 | -0.01 | 1 | 36  | 0.0059   | 1 | KIIVANS GSL           | 3.18E+06 | control-Rep II     |

|             |             |         |         |         |       |   |     |          |   |                           |          |                    |
|-------------|-------------|---------|---------|---------|-------|---|-----|----------|---|---------------------------|----------|--------------------|
| gil118099   | FBgn0004432 | 501.3   | 1000.59 | 1000.59 | -0.01 | 1 | 33  | 0.01     | 1 | KIIVANSGL                 | 4.15E+06 | control-Rep I      |
| gil118099   | FBgn0004432 | 600.96  | 1799.87 | 1799.87 | 0     | 1 | 37  | 0.0016   | 1 | SIYGNKFPDENFELK           | 2.84E+07 | parkin null-Rep II |
| gil45549139 | FBgn0004432 | 600.97  | 1799.88 | 1799.87 | 0.01  | 1 | 25  | 0.041    | 1 | SIYGNKFPDENFELK           | 3.02E+07 | control-Rep II     |
| gil118099   | FBgn0004432 | 600.97  | 1799.87 | 1799.87 | 0     | 1 | 29  | 0.012    | 1 | SIYGNKFPDENFELK           | 3.22E+07 | control-Rep I      |
| gil118099   | FBgn0004432 | 600.97  | 1799.87 | 1799.87 | 0     | 1 | 22  | 0.067    | 1 | SIYGNKFPDENFELK           | 3.51E+07 | parkin null-Rep I  |
| gil45549139 | FBgn0004432 | 806.38  | 1610.74 | 1610.74 | 0     | 0 | 50  | 8.30E-05 | 1 | VFFDMTADNEPLGR            | 4.96E+07 | control-Rep II     |
| gil118099   | FBgn0004432 | 806.37  | 1610.73 | 1610.74 | -0.01 | 0 | 65  | 2.40E-06 | 1 | VFFDMTADNEPLGR            | 5.24E+07 | parkin null-Rep II |
| gil118099   | FBgn0004432 | 806.38  | 1610.74 | 1610.74 | 0     | 0 | 42  | 0.00045  | 1 | VFFDMTADNEPLGR            | 5.64E+07 | control-Rep I      |
| gil118099   | FBgn0004432 | 806.38  | 1610.75 | 1610.74 | 0.01  | 0 | 41  | 0.00068  | 1 | VFFDMTADNEPLGR            | 5.64E+07 | parkin null-Rep I  |
| gil103129   | FBgn0004435 | 902.46  | 1802.91 | 1802.91 | 0     | 0 | 50  | 0.00024  | 1 | IEQADYLPTEQDILR           | 3.62E+06 | control-Rep II     |
| gil103129   | FBgn0004435 | 902.47  | 1802.93 | 1802.91 | 0.02  | 0 | 37  | 0.0055   | 1 | IEQADYLPTEQDILR           | 3.69E+06 | control-Rep I      |
| gil103129   | FBgn0004435 | 902.46  | 1802.91 | 1802.91 | 0     | 0 | 56  | 5.80E-05 | 1 | IEQADYLPTEQDILR           | 3.92E+06 | parkin null-Rep I  |
| gil103129   | FBgn0004435 | 902.47  | 1802.93 | 1802.91 | 0.02  | 0 | 46  | 0.00061  | 1 | IEQADYLPTEQDILR           | 4.40E+06 | parkin null-Rep II |
| gil103129   | FBgn0004435 | 1076.58 | 2151.15 | 2151.13 | 0.02  | 0 | 67  | 3.60E-06 | 1 | VPTTGILEYFPDLDGIVFR       | 6.96E+06 | parkin null-Rep II |
| gil103129   | FBgn0004435 | 1076.58 | 2151.14 | 2151.13 | 0.01  | 0 | 58  | 1.90E-05 | 1 | VPTTGILEYFPDLDGIVFR       | 8.24E+06 | parkin null-Rep I  |
| gil103129   | FBgn0004435 | 1076.58 | 2151.15 | 2151.13 | 0.02  | 0 | 79  | 1.50E-07 | 1 | VPTTGILEYFPDLDGIVFR       | 9.70E+06 | control-Rep I      |
| gil103129   | FBgn0004435 | 1076.58 | 2151.15 | 2151.13 | 0.03  | 0 | 82  | 7.70E-08 | 1 | VPTTGILEYFPDLDGIVFR       | 9.78E+06 | control-Rep II     |
| gil5305433  | FBgn0004507 | 893.39  | 1784.77 | 1784.77 | 0     | 0 | 55  | 6.10E-06 | 1 | DSLHFDYFEMEPQK            | 3.68E+06 | control-Rep II     |
| gil24581010 | FBgn0004507 | 893.4   | 1784.79 | 1784.77 | 0.01  | 0 | 63  | 3.10E-06 | 1 | DSLHFDYFEMEPQK            | 6.15E+06 | control-Rep I      |
| gil5305433  | FBgn0004507 | 836.91  | 1671.81 | 1671.79 | 0.02  | 0 | 93  | 4.70E-09 | 1 | FFNDGDYIQAVLDR            | 6.76E+06 | parkin null-Rep II |
| gil5305433  | FBgn0004507 | 836.9   | 1671.79 | 1671.79 | 0     | 0 | 81  | 6.50E-08 | 1 | FFNDGDYIQAVLDR            | 8.11E+06 | parkin null-Rep I  |
| gil5305433  | FBgn0004507 | 836.91  | 1671.8  | 1671.79 | 0.02  | 0 | 86  | 2.70E-08 | 1 | FFNDGDYIQAVLDR            | 1.34E+07 | control-Rep II     |
| gil24581010 | FBgn0004507 | 836.91  | 1671.8  | 1671.79 | 0.01  | 0 | 83  | 4.60E-08 | 1 | FFNDGDYIQAVLDR            | 1.37E+07 | control-Rep I      |
| gil5305433  | FBgn0004507 | 608.33  | 1214.65 | 1214.65 | -0.01 | 0 | 30  | 0.03     | 1 | GIAEVGNVTEVK              | 5.37E+06 | control-Rep II     |
| gil24581010 | FBgn0004507 | 608.33  | 1214.65 | 1214.65 | -0.01 | 0 | 27  | 0.06     | 1 | GIAEVGNVTEVK              | 8.25E+06 | control-Rep I      |
| gil5305433  | FBgn0004507 | 1240.6  | 2479.18 | 2479.16 | 0.02  | 0 | 93  | 3.70E-09 | 1 | IMPAADLSEQISTAGTEASGTGNMK | 3.41E+06 | parkin null-Rep II |
| gil5305433  | FBgn0004507 | 1240.58 | 2479.15 | 2479.16 | -0.01 | 0 | 100 | 1.00E-09 | 1 | IMPAADLSEQISTAGTEASGTGNMK | 6.12E+06 | parkin null-Rep I  |
| gil24581010 | FBgn0004507 | 827.39  | 2479.16 | 2479.16 | 0     | 0 | 44  | 0.00026  | 1 | IMPAADLSEQISTAGTEASGTGNMK | 9.01E+06 | control-Rep I      |
| gil5305433  | FBgn0004507 | 689.86  | 1377.71 | 1377.7  | 0.01  | 0 | 41  | 0.0014   | 1 | INPSSMFDIQVK              | 4.40E+06 | parkin null-Rep II |
| gil5305433  | FBgn0004507 | 689.86  | 1377.71 | 1377.7  | 0.01  | 0 | 49  | 0.00025  | 1 | INPSSMFDIQVK              | 5.74E+06 | control-Rep II     |
| gil24581010 | FBgn0004507 | 689.86  | 1377.71 | 1377.7  | 0.01  | 0 | 49  | 0.00026  | 1 | INPSSMFDIQVK              | 6.66E+06 | control-Rep I      |
| gil5305433  | FBgn0004507 | 949.01  | 1896.01 | 1895.98 | 0.03  | 0 | 76  | 3.40E-07 | 1 | LICAVGNVVNNDPIVGDK        | 4.56E+06 | parkin null-Rep II |
| gil24581010 | FBgn0004507 | 948.99  | 1895.96 | 1895.98 | -0.02 | 0 | 71  | 1.00E-06 | 1 | LICAVGNVVNNDPIVGDK        | 5.57E+06 | control-Rep I      |
| gil5305433  | FBgn0004507 | 949     | 1895.98 | 1895.98 | 0     | 0 | 71  | 1.10E-06 | 1 | LICAVGNVVNNDPIVGDK        | 6.89E+06 | control-Rep II     |
| gil5305433  | FBgn0004507 | 1111.55 | 2221.09 | 2221.08 | 0.01  | 0 | 64  | 7.40E-06 | 1 | QVIDIQGGFFSPGNPNEFK       | 1.86E+06 | parkin null-Rep II |
| gil5305433  | FBgn0004507 | 1111.54 | 2221.07 | 2221.08 | -0.01 | 0 | 71  | 8.90E-07 | 1 | QVIDIQGGFFSPGNPNEFK       | 3.06E+06 | control-Rep II     |
| gil24581010 | FBgn0004507 | 1111.55 | 2221.09 | 2221.08 | 0     | 0 | 79  | 1.60E-07 | 1 | QVIDIQGGFFSPGNPNEFK       | 3.70E+06 | control-Rep I      |
| gil24581010 | FBgn0004507 | 849.41  | 2545.22 | 2545.22 | 0     | 0 | 27  | 0.019    | 1 | VFAMPYDNPIPGYNNNHVNTLR    | 1.98E+07 | control-Rep I      |
| gil5305433  | FBgn0004507 | 849.42  | 2545.23 | 2545.22 | 0.01  | 0 | 22  | 0.055    | 1 | VFAMPYDNPIPGYNNNHVNTLR    | 2.04E+07 | control-Rep II     |

|             |             |         |         |         |       |   |    |          |   |                            |          |                    |
|-------------|-------------|---------|---------|---------|-------|---|----|----------|---|----------------------------|----------|--------------------|
| gi 5305433  | FBgn0004507 | 921.5   | 1840.98 | 1840.98 | 0.01  | 0 | 73 | 5.70E-07 | 1 | WLLLCNPGLSDLIAEK           | 8.47E+06 | parkin null-Rep I  |
| gi 5305433  | FBgn0004507 | 921.51  | 1841    | 1840.98 | 0.02  | 0 | 71 | 8.40E-07 | 1 | WLLLCNPGLSDLIAEK           | 1.31E+07 | control-Rep II     |
| gi 24581010 | FBgn0004507 | 921.5   | 1840.99 | 1840.98 | 0.02  | 0 | 91 | 1.00E-08 | 1 | WLLLCNPGLSDLIAEK           | 1.36E+07 | control-Rep I      |
| gi 5305433  | FBgn0004507 | 705.42  | 1408.82 | 1408.81 | 0.01  | 0 | 99 | 7.10E-10 | 1 | WPVSLLESILPR               | 1.21E+07 | parkin null-Rep II |
| gi 5305433  | FBgn0004507 | 705.41  | 1408.81 | 1408.81 | 0     | 0 | 80 | 7.00E-08 | 1 | WPVSLLESILPR               | 1.58E+07 | parkin null-Rep I  |
| gi 5305433  | FBgn0004507 | 705.42  | 1408.83 | 1408.81 | 0.02  | 0 | 68 | 1.10E-06 | 1 | WPVSLLESILPR               | 1.97E+07 | control-Rep II     |
| gi 24581010 | FBgn0004507 | 705.41  | 1408.81 | 1408.81 | 0     | 0 | 76 | 2.80E-07 | 1 | WPVSLLESILPR               | 2.23E+07 | control-Rep I      |
| gi 118314   | FBgn0004516 | 907.49  | 1812.96 | 1812.97 | 0     | 0 | 66 | 4.10E-06 | 1 | ALPLQLIEDCATTLK            | 1.54E+07 | parkin null-Rep I  |
| gi 118314   | FBgn0004516 | 907.49  | 1812.97 | 1812.97 | 0.01  | 0 | 89 | 2.00E-08 | 1 | ALPLQLIEDCATTLK            | 1.59E+07 | control-Rep II     |
| gi 118314   | FBgn0004516 | 907.49  | 1812.96 | 1812.97 | -0.01 | 0 | 65 | 4.90E-06 | 1 | ALPLQLIEDCATTLK            | 1.59E+07 | parkin null-Rep II |
| gi 118314   | FBgn0004516 | 907.5   | 1812.99 | 1812.97 | 0.02  | 0 | 67 | 3.40E-06 | 1 | ALPLQLIEDCATTLK            | 1.67E+07 | control-Rep I      |
| gi 118314   | FBgn0004516 | 968.98  | 1935.95 | 1935.96 | -0.02 | 0 | 41 | 0.00098  | 1 | LTAYDLMPTTVTAGPETR         | 3.14E+06 | control-Rep I      |
| gi 118314   | FBgn0004516 | 968.99  | 1935.97 | 1935.96 | 0.01  | 0 | 48 | 0.00023  | 1 | LTAYDLMPTTVTAGPETR         | 4.68E+06 | parkin null-Rep II |
| gi 118314   | FBgn0004516 | 580.85  | 1159.69 | 1159.69 | 0     | 0 | 52 | 4.40E-05 | 1 | VIDVLLDFVK                 | 7.21E+06 | parkin null-Rep I  |
| gi 118314   | FBgn0004516 | 580.85  | 1159.69 | 1159.69 | 0     | 0 | 48 | 0.00011  | 1 | VIDVLLDFVK                 | 9.23E+06 | parkin null-Rep II |
| gi 118314   | FBgn0004516 | 580.85  | 1159.69 | 1159.69 | 0     | 0 | 43 | 0.00034  | 1 | VIDVLLDFVK                 | 1.46E+07 | control-Rep I      |
| gi 280603   | FBgn0004551 | 822.05  | 2463.13 | 2463.13 | 0     | 0 | 35 | 0.0016   | 1 | CLALAVADSPMKPDEMGLDSTK     | 3.79E+06 | control-Rep I      |
| gi 280603   | FBgn0004551 | 822.05  | 2463.13 | 2463.13 | 0     | 0 | 58 | 1.00E-05 | 1 | CLALAVADSPMKPDEMGLDSTK     | 4.49E+06 | parkin null-Rep II |
| gi 12644163 | FBgn0004551 | 741.08  | 2220.21 | 2220.2  | 0.01  | 1 | 22 | 0.045    | 1 | EIVPGDLVEVSVGDKIPADIR      | 2.06E+07 | parkin null-Rep I  |
| gi 12644163 | FBgn0004551 | 741.08  | 2220.22 | 2220.2  | 0.02  | 1 | 24 | 0.03     | 1 | EIVPGDLVEVSVGDKIPADIR      | 2.12E+07 | control-Rep II     |
| gi 280603   | FBgn0004551 | 741.08  | 2220.21 | 2220.2  | 0.01  | 1 | 27 | 0.014    | 1 | EIVPGDLVEVSVGDKIPADIR      | 2.20E+07 | control-Rep I      |
| gi 280603   | FBgn0004551 | 737.44  | 1472.86 | 1472.85 | 0.01  | 0 | 69 | 8.00E-07 | 1 | FSIPVVLLDETLK              | 2.04E+07 | parkin null-Rep II |
| gi 12644163 | FBgn0004551 | 737.44  | 1472.86 | 1472.85 | 0.01  | 0 | 77 | 1.30E-07 | 1 | FSIPVVLLDETLK              | 2.50E+07 | parkin null-Rep I  |
| gi 12644163 | FBgn0004551 | 737.43  | 1472.86 | 1472.85 | 0.01  | 0 | 61 | 5.80E-06 | 1 | FSIPVVLLDETLK              | 2.70E+07 | control-Rep II     |
| gi 280603   | FBgn0004551 | 737.44  | 1472.86 | 1472.85 | 0.01  | 0 | 62 | 3.80E-06 | 1 | FSIPVVLLDETLK              | 2.73E+07 | control-Rep I      |
| gi 280603   | FBgn0004551 | 794.94  | 1587.86 | 1587.87 | -0.01 | 0 | 52 | 0.0001   | 1 | IDQSILTGESVSVIK            | 1.15E+07 | parkin null-Rep II |
| gi 12644163 | FBgn0004551 | 794.94  | 1587.87 | 1587.87 | 0     | 0 | 64 | 4.10E-06 | 1 | IDQSILTGESVSVIK            | 1.29E+07 | control-Rep II     |
| gi 12644163 | FBgn0004551 | 794.94  | 1587.87 | 1587.87 | -0.01 | 0 | 58 | 2.00E-05 | 1 | IDQSILTGESVSVIK            | 1.59E+07 | parkin null-Rep I  |
| gi 280603   | FBgn0004551 | 794.95  | 1587.89 | 1587.87 | 0.01  | 0 | 53 | 5.30E-05 | 1 | IDQSILTGESVSVIK            | 1.78E+07 | control-Rep I      |
| gi 12644163 | FBgn0004551 | 1375.66 | 2749.31 | 2749.33 | -0.02 | 0 | 42 | 0.00099  | 1 | IVEFLQSMNEISAMTGDGVNDAPALK | 2.25E+06 | parkin null-Rep I  |
| gi 280603   | FBgn0004551 | 1375.67 | 2749.32 | 2749.33 | -0.01 | 0 | 42 | 0.00056  | 1 | IVEFLQSMNEISAMTGDGVNDAPALK | 4.16E+06 | control-Rep I      |
| gi 280603   | FBgn0004551 | 501.95  | 1502.81 | 1502.81 | 0     | 1 | 38 | 0.002    | 1 | KAEIGIAMGSGTAVAK           | 5.18E+06 | parkin null-Rep II |
| gi 12644163 | FBgn0004551 | 501.95  | 1502.83 | 1502.81 | 0.02  | 1 | 36 | 0.003    | 1 | KAEIGIAMGSGTAVAK           | 7.33E+06 | parkin null-Rep I  |
| gi 12644163 | FBgn0004551 | 752.42  | 1502.83 | 1502.81 | 0.01  | 1 | 76 | 4.80E-07 | 1 | KAEIGIAMGSGTAVAK           | 7.38E+06 | control-Rep II     |
| gi 280603   | FBgn0004551 | 501.95  | 1502.81 | 1502.81 | 0     | 1 | 44 | 0.00062  | 1 | KAEIGIAMGSGTAVAK           | 1.29E+07 | control-Rep I      |
| gi 280603   | FBgn0004551 | 976.96  | 1951.91 | 1951.92 | -0.02 | 0 | 99 | 8.60E-10 | 1 | SLPSVETLGCTSVICS DK        | 5.43E+06 | parkin null-Rep II |
| gi 280603   | FBgn0004551 | 976.97  | 1951.93 | 1951.92 | 0     | 0 | 77 | 2.00E-07 | 1 | SLPSVETLGCTSVICS DK        | 7.00E+06 | control-Rep I      |
| gi 12644163 | FBgn0004551 | 976.96  | 1951.91 | 1951.92 | -0.02 | 0 | 75 | 2.00E-07 | 1 | SLPSVETLGCTSVICS DK        | 9.92E+06 | control-Rep II     |
| gi 280603   | FBgn0004551 | 698.35  | 1394.69 | 1394.68 | 0     | 0 | 46 | 0.00091  | 1 | TGTLTTNQMSVSR              | 1.33E+06 | parkin null-Rep II |

|             |             |         |         |         |       |   |    |          |   |                         |          |                    |
|-------------|-------------|---------|---------|---------|-------|---|----|----------|---|-------------------------|----------|--------------------|
| gil12644163 | FBgn0004551 | 698.35  | 1394.69 | 1394.68 | 0     | 0 | 42 | 0.0021   | 1 | TGTLTTNQMSVSR           | 1.84E+06 | parkin null-Rep I  |
| gil280603   | FBgn0004551 | 698.35  | 1394.69 | 1394.68 | 0     | 0 | 52 | 0.00022  | 1 | TGTLTTNQMSVSR           | 2.66E+06 | control-Rep I      |
| gil12644163 | FBgn0004551 | 698.35  | 1394.68 | 1394.68 | 0     | 0 | 58 | 4.00E-05 | 1 | TGTLTTNQMSVSR           | 2.82E+06 | control-Rep II     |
| gil280603   | FBgn0004551 | 870.42  | 1738.82 | 1738.82 | 0     | 0 | 72 | 5.50E-07 | 1 | TVEQSLNFFGTDPER         | 1.03E+07 | parkin null-Rep II |
| gil12644163 | FBgn0004551 | 870.42  | 1738.82 | 1738.82 | 0     | 0 | 61 | 7.00E-06 | 1 | TVEQSLNFFGTDPER         | 1.29E+07 | control-Rep II     |
| gil12644163 | FBgn0004551 | 870.43  | 1738.84 | 1738.82 | 0.02  | 0 | 86 | 2.30E-08 | 1 | TVEQSLNFFGTDPER         | 1.30E+07 | parkin null-Rep I  |
| gil280603   | FBgn0004551 | 870.41  | 1738.81 | 1738.82 | -0.01 | 0 | 69 | 1.30E-06 | 1 | TVEQSLNFFGTDPER         | 1.60E+07 | control-Rep I      |
| gil479373   | FBgn0004574 | 593.82  | 1185.63 | 1185.64 | -0.01 | 0 | 38 | 0.0039   | 1 | NIDLAASVQQK             | 2.86E+06 | parkin null-Rep II |
| gil479373   | FBgn0004574 | 593.83  | 1185.65 | 1185.64 | 0.01  | 0 | 49 | 0.00024  | 1 | NIDLAASVQQK             | 3.94E+06 | control-Rep II     |
| gil479373   | FBgn0004574 | 593.82  | 1185.63 | 1185.64 | -0.01 | 0 | 53 | 0.00011  | 1 | NIDLAASVQQK             | 4.51E+06 | control-Rep I      |
| gil479373   | FBgn0004574 | 796.86  | 1591.7  | 1591.7  | -0.01 | 0 | 84 | 1.70E-08 | 1 | VEQDLAMGTDAEGEK         | 1.95E+06 | parkin null-Rep I  |
| gil479373   | FBgn0004574 | 796.85  | 1591.69 | 1591.7  | -0.01 | 0 | 60 | 2.90E-06 | 1 | VEQDLAMGTDAEGEK         | 2.06E+06 | parkin null-Rep II |
| gil479373   | FBgn0004574 | 796.86  | 1591.71 | 1591.7  | 0     | 0 | 67 | 9.60E-07 | 1 | VEQDLAMGTDAEGEK         | 3.15E+06 | control-Rep II     |
| gil157529   | FBgn0004623 | 774.84  | 1547.67 | 1547.67 | -0.01 | 0 | 54 | 9.80E-06 | 1 | ELMGYEGFLSSCR           | 5.40E+06 | parkin null-Rep I  |
| gil71878    | FBgn0004623 | 774.85  | 1547.69 | 1547.67 | 0.01  | 0 | 41 | 0.0003   | 1 | ELMGYEGFLSSCR           | 6.93E+06 | control-Rep II     |
| gil71878    | FBgn0004623 | 774.84  | 1547.67 | 1547.67 | -0.01 | 0 | 44 | 9.10E-05 | 1 | ELMGYEGFLSSCR           | 8.40E+06 | parkin null-Rep II |
| gil71878    | FBgn0004623 | 774.85  | 1547.69 | 1547.67 | 0.01  | 0 | 40 | 0.00045  | 1 | ELMGYEGFLSSCR           | 9.99E+06 | control-Rep I      |
| gil157529   | FBgn0004623 | 537.26  | 1072.5  | 1072.5  | 0     | 0 | 48 | 8.80E-05 | 1 | HCVTGSLDGK              | 1.93E+06 | parkin null-Rep I  |
| gil71878    | FBgn0004623 | 537.26  | 1072.5  | 1072.5  | 0.01  | 0 | 45 | 0.00018  | 1 | HCVTGSLDGK              | 2.33E+06 | parkin null-Rep II |
| gil71878    | FBgn0004623 | 537.26  | 1072.5  | 1072.5  | 0     | 0 | 44 | 0.00017  | 1 | HCVTGSLDGK              | 3.02E+06 | control-Rep II     |
| gil71878    | FBgn0004623 | 537.26  | 1072.5  | 1072.5  | 0     | 0 | 42 | 0.00027  | 1 | HCVTGSLDGK              | 4.76E+06 | control-Rep I      |
| gil71878    | FBgn0004623 | 662.34  | 1322.67 | 1322.65 | 0.01  | 0 | 33 | 0.014    | 1 | LYDEINGMIQK             | 3.44E+06 | parkin null-Rep II |
| gil71878    | FBgn0004623 | 662.33  | 1322.65 | 1322.65 | -0.01 | 0 | 57 | 4.10E-05 | 1 | LYDEINGMIQK             | 3.81E+06 | control-Rep II     |
| gil71878    | FBgn0004623 | 662.33  | 1322.65 | 1322.65 | -0.01 | 0 | 51 | 0.00017  | 1 | LYDEINGMIQK             | 6.26E+06 | control-Rep I      |
| gil157529   | FBgn0004623 | 396.86  | 1187.56 | 1187.57 | -0.01 | 0 | 27 | 0.014    | 1 | VNSVHFAGDSR             | 3.04E+05 | parkin null-Rep I  |
| gil71878    | FBgn0004623 | 396.86  | 1187.56 | 1187.57 | -0.01 | 0 | 30 | 0.007    | 1 | VNSVHFAGDSR             | 4.87E+05 | control-Rep I      |
| gil480358   | FBgn0004868 | 824.89  | 1647.77 | 1647.77 | -0.01 | 0 | 48 | 0.00012  | 1 | DDEYLNPAVNTIR           | 4.20E+06 | control-Rep II     |
| gil480358   | FBgn0004868 | 824.89  | 1647.77 | 1647.77 | -0.01 | 0 | 58 | 1.30E-05 | 1 | DDEYLNPAVNTIR           | 4.67E+06 | control-Rep I      |
| gil480358   | FBgn0004868 | 824.89  | 1647.77 | 1647.77 | -0.01 | 0 | 63 | 4.20E-06 | 1 | DDEYLNPAVNTIR           | 5.73E+06 | parkin null-Rep II |
| gil480358   | FBgn0004868 | 721.35  | 1440.68 | 1440.66 | 0.01  | 0 | 71 | 6.60E-07 | 1 | EALASDLMGMFEK           | 1.22E+07 | parkin null-Rep II |
| gil480358   | FBgn0004868 | 721.34  | 1440.67 | 1440.66 | 0     | 0 | 82 | 4.10E-08 | 1 | EALASDLMGMFEK           | 1.27E+07 | control-Rep II     |
| gil480358   | FBgn0004868 | 721.34  | 1440.66 | 1440.66 | 0     | 0 | 84 | 2.10E-08 | 1 | EALASDLMGMFEK           | 1.29E+07 | parkin null-Rep I  |
| gil480358   | FBgn0004868 | 721.34  | 1440.67 | 1440.66 | 0     | 0 | 98 | 1.10E-09 | 1 | EALASDLMGMFEK           | 1.43E+07 | control-Rep I      |
| gil480358   | FBgn0004868 | 645.02  | 1932.04 | 1932.03 | 0.01  | 1 | 44 | 0.00044  | 1 | KSDIYVSLVSSTHQVAAK      | 4.04E+06 | parkin null-Rep II |
| gil480358   | FBgn0004868 | 645.02  | 1932.03 | 1932.03 | 0     | 1 | 29 | 0.013    | 1 | KSDIYVSLVSSTHQVAAK      | 5.51E+06 | parkin null-Rep I  |
| gil480358   | FBgn0004868 | 645.02  | 1932.04 | 1932.03 | 0.01  | 1 | 33 | 0.0053   | 1 | KSDIYVSLVSSTHQVAAK      | 6.17E+06 | control-Rep II     |
| gil290211   | FBgn0004873 | 1098.59 | 2195.16 | 2195.15 | 0     | 0 | 33 | 0.0059   | 1 | DGGAGASGILQQLSDIVGVPVSR | 2.75E+06 | control-Rep I      |
| gil290211   | FBgn0004873 | 732.73  | 2195.17 | 2195.15 | 0.02  | 0 | 33 | 0.0046   | 1 | DGGAGASGILQQLSDIVGVPVSR | 3.41E+06 | control-Rep II     |
| gil290211   | FBgn0004873 | 746.87  | 1491.73 | 1491.72 | 0     | 0 | 85 | 4.10E-08 | 1 | FAAVAAAEDGAATAEK        | 2.26E+05 | parkin null-Rep I  |

|             |             |         |         |         |       |   |     |          |   |                                |          |                    |
|-------------|-------------|---------|---------|---------|-------|---|-----|----------|---|--------------------------------|----------|--------------------|
| gil290211   | FBgn0004873 | 746.86  | 1491.71 | 1491.72 | -0.02 | 0 | 89  | 1.30E-08 | 1 | FAAVAAAEDGAATAEK               | 2.72E+06 | control-Rep I      |
| gil290211   | FBgn0004873 | 978.17  | 2931.47 | 2931.47 | 0     | 1 | 56  | 2.30E-05 | 1 | KYPQSEPETEHQVIEIQTQQAPVPR      | 1.41E+06 | parkin null-Rep I  |
| gil290211   | FBgn0004873 | 978.16  | 2931.47 | 2931.47 | 0     | 1 | 56  | 2.70E-05 | 1 | KYPQSEPETEHQVIEIQTQQAPVPR      | 3.11E+06 | control-Rep II     |
| gil384212   | FBgn0004873 | 939.05  | 1876.09 | 1876.07 | 0.03  | 0 | 33  | 0.0016   | 1 | LLPVGLDNLVLIPEESR              | 7.58E+06 | parkin null-Rep II |
| gil290211   | FBgn0004873 | 939.05  | 1876.09 | 1876.07 | 0.02  | 0 | 27  | 0.0079   | 1 | LLPVGLDNLVLIPEESR              | 7.59E+06 | control-Rep II     |
| gil290211   | FBgn0004873 | 939.04  | 1876.07 | 1876.07 | 0     | 0 | 30  | 0.0045   | 1 | LLPVGLDNLVLIPEESR              | 8.87E+06 | parkin null-Rep I  |
| gil290211   | FBgn0004873 | 939.05  | 1876.09 | 1876.07 | 0.02  | 0 | 30  | 0.0041   | 1 | LLPVGLDNLVLIPEESR              | 9.14E+06 | control-Rep I      |
| gil112683   | FBgn0004907 | 595.34  | 1188.66 | 1188.65 | 0     | 0 | 57  | 3.50E-05 | 1 | DSTLIMQLLR                     | 6.19E+07 | control-Rep II     |
| gil112683   | FBgn0004907 | 595.34  | 1188.66 | 1188.65 | 0.01  | 0 | 62  | 1.00E-05 | 1 | DSTLIMQLLR                     | 7.06E+07 | parkin null-Rep I  |
| gil112683   | FBgn0004907 | 595.34  | 1188.66 | 1188.65 | 0     | 0 | 54  | 6.70E-05 | 1 | DSTLIMQLLR                     | 7.80E+07 | control-Rep I      |
| gil112683   | FBgn0004907 | 595.34  | 1188.66 | 1188.65 | 0.01  | 0 | 57  | 3.90E-05 | 1 | DSTLIMQLLR                     | 7.87E+07 | parkin null-Rep II |
| gil112683   | FBgn0004907 | 726.38  | 1450.75 | 1450.74 | 0.01  | 0 | 61  | 1.50E-05 | 1 | EICYEVLGLLDK                   | 1.50E+07 | parkin null-Rep I  |
| gil112683   | FBgn0004907 | 726.38  | 1450.74 | 1450.74 | 0     | 0 | 58  | 2.70E-05 | 1 | EICYEVLGLLDK                   | 2.13E+07 | control-Rep I      |
| gil112683   | FBgn0004907 | 726.38  | 1450.74 | 1450.74 | 0.01  | 0 | 72  | 1.00E-06 | 1 | EICYEVLGLLDK                   | 2.23E+07 | control-Rep II     |
| gil112683   | FBgn0004907 | 726.38  | 1450.74 | 1450.74 | 0.01  | 0 | 72  | 1.10E-06 | 1 | EICYEVLGLLDK                   | 2.35E+07 | parkin null-Rep II |
| gil112683   | FBgn0004907 | 1058.98 | 2115.95 | 2115.96 | -0.01 | 0 | 117 | 9.30E-12 | 1 | NTVVDDSQTAYQDAFDISK            | 1.80E+07 | control-Rep I      |
| gil112683   | FBgn0004907 | 1058.99 | 2115.96 | 2115.96 | 0     | 0 | 120 | 5.20E-12 | 1 | NTVVDDSQTAYQDAFDISK            | 1.83E+07 | control-Rep II     |
| gil112683   | FBgn0004907 | 1058.99 | 2115.96 | 2115.96 | 0     | 0 | 127 | 8.80E-13 | 1 | NTVVDDSQTAYQDAFDISK            | 1.87E+07 | parkin null-Rep II |
| gil112683   | FBgn0004907 | 1058.99 | 2115.96 | 2115.96 | 0     | 0 | 128 | 7.80E-13 | 1 | NTVVDDSQTAYQDAFDISK            | 2.18E+07 | parkin null-Rep I  |
| gil112683   | FBgn0004907 | 1079.5  | 2156.99 | 2156.97 | 0.01  | 0 | 104 | 2.70E-10 | 1 | QAFDDAIAELDTLNEDSYK            | 2.33E+07 | parkin null-Rep I  |
| gil112683   | FBgn0004907 | 1079.5  | 2156.99 | 2156.97 | 0.01  | 0 | 108 | 9.10E-11 | 1 | QAFDDAIAELDTLNEDSYK            | 2.73E+07 | parkin null-Rep II |
| gil112683   | FBgn0004907 | 1079.5  | 2156.98 | 2156.97 | 0.01  | 0 | 84  | 2.40E-08 | 1 | QAFDDAIAELDTLNEDSYK            | 3.06E+07 | control-Rep II     |
| gil112683   | FBgn0004907 | 1079.5  | 2156.99 | 2156.97 | 0.02  | 0 | 95  | 2.30E-09 | 1 | QAFDDAIAELDTLNEDSYK            | 3.33E+07 | control-Rep I      |
| gil112683   | FBgn0004907 | 775.37  | 1548.73 | 1548.73 | 0.01  | 0 | 75  | 3.80E-07 | 1 | SVTETGVELSNEER                 | 2.16E+07 | parkin null-Rep II |
| gil112683   | FBgn0004907 | 775.37  | 1548.73 | 1548.73 | 0     | 0 | 72  | 8.10E-07 | 1 | SVTETGVELSNEER                 | 2.58E+07 | parkin null-Rep I  |
| gil112683   | FBgn0004907 | 775.37  | 1548.73 | 1548.73 | 0     | 0 | 91  | 1.00E-08 | 1 | SVTETGVELSNEER                 | 3.12E+07 | control-Rep II     |
| gil112683   | FBgn0004907 | 775.37  | 1548.73 | 1548.73 | 0     | 0 | 82  | 8.10E-08 | 1 | SVTETGVELSNEER                 | 3.25E+07 | control-Rep I      |
| gil112683   | FBgn0004907 | 583.3   | 1164.58 | 1164.58 | 0     | 0 | 49  | 0.00013  | 1 | YLAEVATGDAR                    | 4.60E+06 | parkin null-Rep II |
| gil112683   | FBgn0004907 | 583.3   | 1164.58 | 1164.58 | 0     | 0 | 41  | 0.0011   | 1 | YLAEVATGDAR                    | 5.41E+06 | parkin null-Rep I  |
| gil112683   | FBgn0004907 | 583.3   | 1164.58 | 1164.58 | 0     | 0 | 52  | 8.30E-05 | 1 | YLAEVATGDAR                    | 7.01E+06 | control-Rep II     |
| gil112683   | FBgn0004907 | 583.29  | 1164.57 | 1164.58 | -0.01 | 0 | 24  | 0.11     | 1 | YLAEVATGDAR                    | 8.56E+06 | control-Rep I      |
| gil3929670  | FBgn0005664 | 618.81  | 1235.61 | 1235.61 | 0     | 0 | 44  | 0.00071  | 1 | FNSLEELQTR                     | 3.07E+07 | parkin null-Rep II |
| gil17136792 | FBgn0005664 | 618.82  | 1235.62 | 1235.61 | 0     | 0 | 57  | 3.50E-05 | 1 | FNSLEELQTR                     | 3.61E+07 | parkin null-Rep I  |
| gil3929670  | FBgn0005664 | 618.82  | 1235.62 | 1235.61 | 0.01  | 0 | 53  | 9.20E-05 | 1 | FNSLEELQTR                     | 3.95E+07 | control-Rep II     |
| gil17136792 | FBgn0005664 | 618.81  | 1235.61 | 1235.61 | 0     | 0 | 56  | 4.00E-05 | 1 | FNSLEELQTR                     | 4.43E+07 | control-Rep I      |
| gil3929670  | FBgn0005664 | 1108.98 | 3323.92 | 3323.88 | 0.04  | 0 | 53  | 3.00E-06 | 1 | LLDQQTLLLAQSLPSIQATVVSHPTLLATR | 5.03E+07 | control-Rep II     |
| gil3929670  | FBgn0005664 | 1108.98 | 3323.92 | 3323.88 | 0.04  | 0 | 57  | 1.20E-06 | 1 | LLDQQTLLLAQSLPSIQATVVSHPTLLATR | 6.01E+07 | parkin null-Rep II |
| gil17136792 | FBgn0005664 | 1108.98 | 3323.92 | 3323.88 | 0.04  | 0 | 50  | 6.20E-06 | 1 | LLDQQTLLLAQSLPSIQATVVSHPTLLATR | 6.17E+07 | parkin null-Rep I  |
| gil17136792 | FBgn0005664 | 1108.97 | 3323.9  | 3323.88 | 0.01  | 0 | 54  | 2.80E-06 | 1 | LLDQQTLLLAQSLPSIQATVVSHPTLLATR | 7.05E+07 | control-Rep I      |

|             |             |         |         |         |       |   |     |          |   |                                     |          |                    |
|-------------|-------------|---------|---------|---------|-------|---|-----|----------|---|-------------------------------------|----------|--------------------|
| gij3929670  | FBgn0005664 | 700.37  | 1398.72 | 1398.73 | 0     | 0 | 73  | 6.90E-07 | 1 | LLNNDLWQLDR                         | 1.32E+08 | control-Rep II     |
| gij3929670  | FBgn0005664 | 700.37  | 1398.73 | 1398.73 | 0     | 0 | 72  | 7.50E-07 | 1 | LLNNDLWQLDR                         | 1.53E+08 | parkin null-Rep II |
| gij17136792 | FBgn0005664 | 700.37  | 1398.73 | 1398.73 | 0.01  | 0 | 73  | 7.00E-07 | 1 | LLNNDLWQLDR                         | 1.58E+08 | parkin null-Rep I  |
| gij17136792 | FBgn0005664 | 700.37  | 1398.73 | 1398.73 | 0.01  | 0 | 64  | 5.30E-06 | 1 | LLNNDLWQLDR                         | 1.66E+08 | control-Rep I      |
| gij17136792 | FBgn0005664 | 568.3   | 1134.59 | 1134.59 | 0     | 0 | 49  | 0.00034  | 1 | LPVSTTTSSSR                         | 3.84E+05 | parkin null-Rep I  |
| gij17136792 | FBgn0005664 | 568.3   | 1134.59 | 1134.59 | 0     | 0 | 43  | 0.0015   | 1 | LPVSTTTSSSR                         | 4.02E+05 | control-Rep I      |
| gij17136792 | FBgn0005664 | 1003.87 | 3008.59 | 3008.55 | 0.04  | 0 | 95  | 2.80E-09 | 1 | LTAQAIAEAQSLVEAQQASQLQLEAQNR        | 1.00E+07 | control-Rep I      |
| gij17136792 | FBgn0005664 | 1003.87 | 3008.58 | 3008.55 | 0.03  | 0 | 89  | 1.30E-08 | 1 | LTAQAIAEAQSLVEAQQASQLQLEAQNR        | 1.47E+07 | parkin null-Rep I  |
| gij3929670  | FBgn0005664 | 1003.87 | 3008.58 | 3008.55 | 0.02  | 0 | 92  | 6.00E-09 | 1 | LTAQAIAEAQSLVEAQQASQLQLEAQNR        | 1.62E+07 | control-Rep II     |
| gij3929670  | FBgn0005664 | 1003.87 | 3008.57 | 3008.55 | 0.02  | 0 | 98  | 1.50E-09 | 1 | LTAQAIAEAQSLVEAQQASQLQLEAQNR        | 1.97E+07 | parkin null-Rep II |
| gij3929670  | FBgn0005664 | 1055.89 | 3164.66 | 3164.65 | 0     | 1 | 113 | 3.50E-11 | 1 | LTAQAIAEAQSLVEAQQASQLQLEAQNR        | 7.94E+06 | control-Rep II     |
| gij17136792 | FBgn0005664 | 1055.9  | 3164.67 | 3164.65 | 0.02  | 1 | 126 | 1.30E-12 | 1 | LTAQAIAEAQSLVEAQQASQLQLEAQNR        | 1.82E+07 | parkin null-Rep I  |
| gij3929670  | FBgn0005664 | 1323.14 | 2644.27 | 2644.24 | 0.02  | 0 | 65  | 2.60E-06 | 1 | NQAQQLMEQFQQVQQEQQR                 | 2.73E+05 | parkin null-Rep II |
| gij17136792 | FBgn0005664 | 882.42  | 2644.24 | 2644.24 | 0     | 0 | 21  | 0.13     | 1 | NQAQQLMEQFQQVQQEQQR                 | 1.85E+06 | control-Rep I      |
| gij3929670  | FBgn0005664 | 519.28  | 1554.82 | 1554.83 | -0.01 | 1 | 29  | 0.037    | 1 | RLNNDLWQLDR                         | 9.04E+06 | parkin null-Rep II |
| gij3929670  | FBgn0005664 | 519.28  | 1554.82 | 1554.83 | -0.01 | 1 | 26  | 0.068    | 1 | RLNNDLWQLDR                         | 9.21E+06 | control-Rep II     |
| gij17136792 | FBgn0005664 | 778.43  | 1554.85 | 1554.83 | 0.02  | 1 | 26  | 0.047    | 1 | RLNNDLWQLDR                         | 1.47E+07 | parkin null-Rep I  |
| gij3929670  | FBgn0005664 | 793.4   | 1584.8  | 1584.8  | 0     | 0 | 92  | 9.00E-09 | 1 | SSNLQQQQQQLR                        | 4.01E+05 | parkin null-Rep II |
| gij3929670  | FBgn0005664 | 793.41  | 1584.8  | 1584.8  | 0     | 0 | 82  | 1.20E-07 | 1 | SSNLQQQQQQLR                        | 5.91E+05 | control-Rep II     |
| gij17136792 | FBgn0005664 | 793.4   | 1584.79 | 1584.8  | -0.01 | 0 | 81  | 2.00E-07 | 1 | SSNLQQQQQQLR                        | 6.32E+05 | control-Rep I      |
| gij17136792 | FBgn0005664 | 793.41  | 1584.81 | 1584.8  | 0.01  | 0 | 82  | 1.10E-07 | 1 | SSNLQQQQQQLR                        | 7.66E+05 | parkin null-Rep I  |
| gij17136792 | FBgn0005664 | 1312.07 | 3933.19 | 3933.14 | 0.05  | 0 | 36  | 0.0008   | 1 | SSQPLILSQPSATVQAQLISSPLLESGLNGLITTR | 3.72E+06 | parkin null-Rep I  |
| gij3929670  | FBgn0005664 | 1312.06 | 3933.16 | 3933.14 | 0.02  | 0 | 21  | 0.02     | 1 | SSQPLILSQPSATVQAQLISSPLLESGLNGLITTR | 3.83E+06 | control-Rep II     |
| gij24646341 | FBgn0005671 | 1168.63 | 2335.24 | 2335.22 | 0.02  | 0 | 52  | 6.60E-05 | 1 | AVVGEEALTPDDLLEYLFLTK               | 2.41E+06 | parkin null-Rep II |
| gij24646341 | FBgn0005671 | 1168.61 | 2335.21 | 2335.22 | -0.01 | 0 | 64  | 6.50E-06 | 1 | AVVGEEALTPDDLLEYLFLTK               | 3.31E+06 | parkin null-Rep I  |
| gij24646341 | FBgn0005671 | 1168.63 | 2335.25 | 2335.22 | 0.03  | 0 | 56  | 2.40E-05 | 1 | AVVGEEALTPDDLLEYLFLTK               | 6.70E+06 | control-Rep I      |
| gij24646341 | FBgn0005671 | 760.9   | 1519.79 | 1519.79 | 0     | 0 | 76  | 4.30E-07 | 1 | AVVQVFEGTSGIDAK                     | 1.25E+07 | parkin null-Rep II |
| gij24646341 | FBgn0005671 | 760.9   | 1519.79 | 1519.79 | 0     | 0 | 89  | 2.50E-08 | 1 | AVVQVFEGTSGIDAK                     | 1.42E+07 | parkin null-Rep I  |
| gij24646341 | FBgn0005671 | 688.89  | 1375.77 | 1375.75 | 0.02  | 0 | 64  | 6.30E-06 | 1 | IPASILAEFYPR                        | 6.66E+06 | parkin null-Rep I  |
| gij24646341 | FBgn0005671 | 688.88  | 1375.75 | 1375.75 | 0     | 0 | 60  | 1.60E-05 | 1 | IPASILAEFYPR                        | 7.46E+06 | control-Rep I      |
| gij24646341 | FBgn0005671 | 688.88  | 1375.75 | 1375.75 | 0     | 0 | 75  | 4.30E-07 | 1 | IPASILAEFYPR                        | 7.65E+06 | control-Rep II     |
| gij24646341 | FBgn0005671 | 688.89  | 1375.77 | 1375.75 | 0.02  | 0 | 79  | 2.00E-07 | 1 | IPASILAEFYPR                        | 8.14E+06 | parkin null-Rep II |
| gij24646341 | FBgn0005671 | 726.72  | 2177.15 | 2177.14 | 0.01  | 0 | 49  | 0.00012  | 1 | IPIFSAAGLPHNEIAAQICR                | 2.59E+07 | parkin null-Rep II |
| gij24646341 | FBgn0005671 | 726.72  | 2177.15 | 2177.14 | 0     | 0 | 55  | 3.20E-05 | 1 | IPIFSAAGLPHNEIAAQICR                | 2.71E+07 | control-Rep II     |
| gij24646341 | FBgn0005671 | 726.72  | 2177.15 | 2177.14 | 0.01  | 0 | 66  | 2.70E-06 | 1 | IPIFSAAGLPHNEIAAQICR                | 2.75E+07 | parkin null-Rep I  |
| gij24646341 | FBgn0005671 | 726.72  | 2177.15 | 2177.14 | 0     | 0 | 50  | 9.00E-05 | 1 | IPIFSAAGLPHNEIAAQICR                | 3.04E+07 | control-Rep I      |
| gij24646341 | FBgn0005671 | 817.75  | 2450.23 | 2450.22 | 0.01  | 0 | 51  | 9.10E-05 | 1 | IYPEEMIQTGISAIDVMNSIAR              | 1.45E+07 | parkin null-Rep I  |
| gij24646341 | FBgn0005671 | 817.76  | 2450.25 | 2450.22 | 0.03  | 0 | 85  | 3.80E-08 | 1 | IYPEEMIQTGISAIDVMNSIAR              | 1.58E+07 | parkin null-Rep II |
| gij24646341 | FBgn0005671 | 817.75  | 2450.24 | 2450.22 | 0.02  | 0 | 80  | 1.20E-07 | 1 | IYPEEMIQTGISAIDVMNSIAR              | 1.61E+07 | control-Rep I      |



|             |             |        |         |         |       |   |    |          |   |                        |          |                    |
|-------------|-------------|--------|---------|---------|-------|---|----|----------|---|------------------------|----------|--------------------|
| gil24646341 | FBgn0005671 | 817.76 | 2450.25 | 2450.22 | 0.03  | 0 | 62 | 7.70E-06 | 1 | YYPEEMIQTGISAIDVMNSIAR | 1.70E+07 | control-Rep II     |
| gil24646341 | FBgn0005671 | 719.86 | 1437.7  | 1437.69 | 0     | 0 | 61 | 8.80E-06 | 1 | NTLCEFTGDILR           | 1.07E+07 | control-Rep II     |
| gil24646341 | FBgn0005671 | 719.85 | 1437.69 | 1437.69 | 0     | 0 | 69 | 1.50E-06 | 1 | NTLCEFTGDILR           | 1.08E+07 | parkin null-Rep I  |
| gil24646341 | FBgn0005671 | 719.86 | 1437.71 | 1437.69 | 0.01  | 0 | 67 | 2.10E-06 | 1 | NTLCEFTGDILR           | 1.40E+07 | control-Rep I      |
| gil24646341 | FBgn0005671 | 791.96 | 1581.9  | 1581.89 | 0.01  | 0 | 44 | 0.00043  | 1 | QIYPPVNVLP SLR         | 1.72E+07 | parkin null-Rep II |
| gil24646341 | FBgn0005671 | 791.95 | 1581.89 | 1581.89 | 0     | 0 | 25 | 0.032    | 1 | QIYPPVNVLP SLR         | 1.93E+07 | control-Rep II     |
| gil24646341 | FBgn0005671 | 791.95 | 1581.89 | 1581.89 | 0     | 0 | 37 | 0.0019   | 1 | QIYPPVNVLP SLR         | 2.27E+07 | control-Rep I      |
| gil24646341 | FBgn0005671 | 545.79 | 1089.57 | 1089.57 | 0     | 0 | 25 | 0.067    | 1 | SGQVLEVSGSK            | 2.14E+05 | parkin null-Rep II |
| gil24646341 | FBgn0005671 | 545.79 | 1089.57 | 1089.57 | 0     | 0 | 28 | 0.032    | 1 | SGQVLEVSGSK            | 3.12E+05 | parkin null-Rep I  |
| gil24646341 | FBgn0005671 | 545.79 | 1089.57 | 1089.57 | 0     | 0 | 38 | 0.003    | 1 | SGQVLEVSGSK            | 5.75E+05 | control-Rep II     |
| gil24646341 | FBgn0005671 | 545.79 | 1089.57 | 1089.57 | 0     | 0 | 31 | 0.015    | 1 | SGQVLEVSGSK            | 6.62E+05 | control-Rep I      |
| gil24646341 | FBgn0005671 | 820.47 | 1638.93 | 1638.92 | 0.01  | 0 | 63 | 5.70E-06 | 1 | TVSGVNGPLVILDEVK       | 1.42E+07 | control-Rep II     |
| gil24646341 | FBgn0005671 | 820.47 | 1638.93 | 1638.92 | 0.01  | 0 | 53 | 5.20E-05 | 1 | TVSGVNGPLVILDEVK       | 1.73E+07 | parkin null-Rep I  |
| gil24646341 | FBgn0005671 | 820.47 | 1638.93 | 1638.92 | 0.01  | 0 | 45 | 0.00022  | 1 | TVSGVNGPLVILDEVK       | 2.00E+07 | control-Rep I      |
| gil103304   | FBgn0005776 | 724.41 | 2170.21 | 2170.19 | 0.02  | 0 | 31 | 0.014    | 1 | ISPFLEASVIDAQVKPTL DK  | 1.29E+06 | parkin null-Rep I  |
| gil103304   | FBgn0005776 | 724.4  | 2170.18 | 2170.19 | -0.01 | 0 | 24 | 0.08     | 1 | ISPFLEASVIDAQVKPTL DK  | 2.16E+06 | control-Rep II     |
| gil103304   | FBgn0005776 | 828.1  | 2481.29 | 2481.26 | 0.03  | 0 | 39 | 0.0017   | 1 | LAIIEYMPALAGQLGQEFFDQK | 4.15E+06 | parkin null-Rep I  |
| gil103304   | FBgn0005776 | 828.1  | 2481.28 | 2481.26 | 0.02  | 0 | 57 | 2.80E-05 | 1 | LAIIEYMPALAGQLGQEFFDQK | 4.84E+06 | control-Rep I      |
| gil103304   | FBgn0005776 | 828.1  | 2481.28 | 2481.26 | 0.02  | 0 | 67 | 2.70E-06 | 1 | LAIIEYMPALAGQLGQEFFDQK | 5.18E+06 | parkin null-Rep II |
| gil103304   | FBgn0005776 | 828.1  | 2481.28 | 2481.26 | 0.02  | 0 | 61 | 9.70E-06 | 1 | LAIIEYMPALAGQLGQEFFDQK | 5.34E+06 | control-Rep II     |
| gil17864292 | FBgn0010100 | 853.42 | 1704.82 | 1704.82 | 0     | 0 | 43 | 0.00059  | 1 | LDFNPLTDEL TGADGK      | 8.67E+06 | parkin null-Rep I  |
| gil17864292 | FBgn0010100 | 853.42 | 1704.83 | 1704.82 | 0.01  | 0 | 62 | 8.30E-06 | 1 | LDFNPLTDEL TGADGK      | 1.14E+07 | parkin null-Rep II |
| gil17864292 | FBgn0010100 | 853.43 | 1704.84 | 1704.82 | 0.02  | 0 | 55 | 4.40E-05 | 1 | LDFNPLTDEL TGADGK      | 1.34E+07 | control-Rep II     |
| gil17864292 | FBgn0010100 | 853.42 | 1704.82 | 1704.82 | 0     | 0 | 49 | 0.00017  | 1 | LDFNPLTDEL TGADGK      | 1.45E+07 | control-Rep I      |
| gil17864292 | FBgn0010100 | 566.97 | 1697.89 | 1697.89 | 0     | 0 | 30 | 0.015    | 1 | LNHTLNDLQIGWFK         | 4.52E+06 | control-Rep II     |
| gil17864292 | FBgn0010100 | 566.97 | 1697.89 | 1697.89 | 0     | 0 | 25 | 0.049    | 1 | LNHTLNDLQIGWFK         | 7.59E+06 | control-Rep I      |
| gil17864292 | FBgn0010100 | 743.39 | 2227.14 | 2227.14 | 0     | 0 | 21 | 0.084    | 1 | VAVPSTVHCDHLIEAQIGGPK  | 2.11E+07 | parkin null-Rep I  |
| gil17864292 | FBgn0010100 | 743.39 | 2227.14 | 2227.14 | 0     | 0 | 24 | 0.043    | 1 | VAVPSTVHCDHLIEAQIGGPK  | 2.36E+07 | control-Rep II     |
| gil17864292 | FBgn0010100 | 743.39 | 2227.15 | 2227.14 | 0     | 0 | 27 | 0.023    | 1 | VAVPSTVHCDHLIEAQIGGPK  | 2.72E+07 | control-Rep I      |
| gil17864292 | FBgn0010100 | 923.4  | 1844.79 | 1844.8  | -0.01 | 0 | 64 | 7.70E-07 | 1 | VGLIGSCTNSSYEDMGR      | 6.84E+06 | parkin null-Rep II |
| gil17864292 | FBgn0010100 | 923.41 | 1844.81 | 1844.8  | 0     | 0 | 53 | 2.30E-05 | 1 | VGLIGSCTNSSYEDMGR      | 7.23E+06 | parkin null-Rep I  |
| gil17864292 | FBgn0010100 | 923.41 | 1844.8  | 1844.8  | 0     | 0 | 77 | 4.90E-08 | 1 | VGLIGSCTNSSYEDMGR      | 9.21E+06 | control-Rep I      |
| gil287945   | FBgn0010217 | 994.53 | 1987.05 | 1987.03 | 0.02  | 0 | 90 | 1.50E-08 | 1 | AIAELGIYPAVDPLDSTSR    | 3.10E+07 | parkin null-Rep II |
| gil287945   | FBgn0010217 | 994.52 | 1987.03 | 1987.03 | 0.01  | 0 | 74 | 6.50E-07 | 1 | AIAELGIYPAVDPLDSTSR    | 3.35E+07 | control-Rep II     |
| gil287945   | FBgn0010217 | 994.53 | 1987.04 | 1987.03 | 0.01  | 0 | 78 | 2.40E-07 | 1 | AIAELGIYPAVDPLDSTSR    | 3.48E+07 | parkin null-Rep I  |
| gil24638766 | FBgn0010217 | 994.53 | 1987.04 | 1987.03 | 0.01  | 0 | 78 | 2.50E-07 | 1 | AIAELGIYPAVDPLDSTSR    | 3.83E+07 | control-Rep I      |
| gil287945   | FBgn0010217 | 961.5  | 1920.99 | 1920.96 | 0.03  | 0 | 84 | 5.30E-08 | 1 | DQEGQDVLLFIDNIFR       | 5.69E+06 | parkin null-Rep I  |
| gil287945   | FBgn0010217 | 961.49 | 1920.97 | 1920.96 | 0.01  | 0 | 80 | 1.40E-07 | 1 | DQEGQDVLLFIDNIFR       | 6.46E+06 | parkin null-Rep II |
| gil24638766 | FBgn0010217 | 961.49 | 1920.96 | 1920.96 | 0.01  | 0 | 86 | 4.00E-08 | 1 | DQEGQDVLLFIDNIFR       | 1.14E+07 | control-Rep I      |

|             |             |         |         |         |       |   |    |          |   |                           |          |                    |
|-------------|-------------|---------|---------|---------|-------|---|----|----------|---|---------------------------|----------|--------------------|
| gij24638766 | FBgn0010217 | 990.99  | 1979.97 | 1979.95 | 0.01  | 0 | 73 | 5.60E-07 | 1 | EGNDLYNEMIEGGVISLK        | 1.48E+06 | control-Rep I      |
| gij287945   | FBgn0010217 | 990.99  | 1979.97 | 1979.95 | 0.01  | 0 | 95 | 3.90E-09 | 1 | EGNDLYNEMIEGGVISLK        | 3.74E+06 | parkin null-Rep II |
| gij287945   | FBgn0010217 | 655.01  | 1962    | 1962    | 0     | 0 | 39 | 0.0019   | 1 | FLSQPFQVAEVFTGHAGK        | 4.93E+07 | parkin null-Rep II |
| gij287945   | FBgn0010217 | 655.01  | 1962.01 | 1962    | 0.01  | 0 | 42 | 0.00087  | 1 | FLSQPFQVAEVFTGHAGK        | 5.62E+07 | control-Rep II     |
| gij287945   | FBgn0010217 | 655.01  | 1962    | 1962    | 0     | 0 | 39 | 0.0019   | 1 | FLSQPFQVAEVFTGHAGK        | 6.29E+07 | parkin null-Rep I  |
| gij24638766 | FBgn0010217 | 655.01  | 1962    | 1962    | 0     | 0 | 43 | 0.00063  | 1 | FLSQPFQVAEVFTGHAGK        | 7.36E+07 | control-Rep I      |
| gij287945   | FBgn0010217 | 718.38  | 1434.75 | 1434.75 | 0     | 0 | 75 | 4.50E-07 | 1 | FTQAGSEVSALLGR            | 6.27E+07 | parkin null-Rep II |
| gij287945   | FBgn0010217 | 718.38  | 1434.75 | 1434.75 | 0     | 0 | 74 | 6.80E-07 | 1 | FTQAGSEVSALLGR            | 6.39E+07 | parkin null-Rep I  |
| gij287945   | FBgn0010217 | 718.38  | 1434.75 | 1434.75 | 0.01  | 0 | 70 | 1.50E-06 | 1 | FTQAGSEVSALLGR            | 6.47E+07 | control-Rep II     |
| gij24638766 | FBgn0010217 | 718.38  | 1434.75 | 1434.75 | 0     | 0 | 82 | 1.10E-07 | 1 | FTQAGSEVSALLGR            | 7.69E+07 | control-Rep I      |
| gij287945   | FBgn0010217 | 488.29  | 974.57  | 974.55  | 0.01  | 0 | 42 | 0.0012   | 1 | IGLFGGAGVGK               | 8.52E+06 | parkin null-Rep I  |
| gij287945   | FBgn0010217 | 488.29  | 974.57  | 974.55  | 0.01  | 0 | 38 | 0.0031   | 1 | IGLFGGAGVGK               | 8.61E+06 | parkin null-Rep II |
| gij287945   | FBgn0010217 | 488.29  | 974.57  | 974.55  | 0.01  | 0 | 40 | 0.002    | 1 | IGLFGGAGVGK               | 1.23E+07 | control-Rep II     |
| gij24638766 | FBgn0010217 | 488.28  | 974.55  | 974.55  | -0.01 | 0 | 37 | 0.0052   | 1 | IGLFGGAGVGK               | 1.75E+07 | control-Rep I      |
| gij287945   | FBgn0010217 | 935.46  | 1868.91 | 1868.92 | -0.01 | 0 | 46 | 0.00044  | 1 | IMDPNIIGQEHYNVAR          | 1.86E+07 | control-Rep II     |
| gij24638766 | FBgn0010217 | 623.98  | 1868.92 | 1868.92 | 0     | 0 | 31 | 0.0088   | 1 | IMDPNIIGQEHYNVAR          | 2.81E+07 | control-Rep I      |
| gij287945   | FBgn0010217 | 1126.55 | 2251.08 | 2251.06 | 0.01  | 0 | 85 | 3.10E-08 | 1 | IPSAVGYQPTLATDMGSMQER     | 5.21E+07 | parkin null-Rep II |
| gij287945   | FBgn0010217 | 1126.53 | 2251.05 | 2251.06 | -0.01 | 0 | 74 | 3.20E-07 | 1 | IPSAVGYQPTLATDMGSMQER     | 6.14E+07 | control-Rep II     |
| gij287945   | FBgn0010217 | 1126.54 | 2251.06 | 2251.06 | 0     | 0 | 70 | 8.90E-07 | 1 | IPSAVGYQPTLATDMGSMQER     | 6.45E+07 | parkin null-Rep I  |
| gij24638766 | FBgn0010217 | 1126.54 | 2251.07 | 2251.06 | 0.01  | 0 | 79 | 1.20E-07 | 1 | IPSAVGYQPTLATDMGSMQER     | 7.35E+07 | control-Rep I      |
| gij287945   | FBgn0010217 | 506.79  | 1011.57 | 1011.57 | -0.01 | 0 | 34 | 0.0031   | 1 | IPVGAETLGR                | 8.91E+05 | control-Rep II     |
| gij24638766 | FBgn0010217 | 506.79  | 1011.57 | 1011.57 | -0.01 | 0 | 33 | 0.0043   | 1 | IPVGAETLGR                | 1.53E+06 | control-Rep I      |
| gij287945   | FBgn0010217 | 559.98  | 1676.93 | 1676.92 | 0     | 0 | 58 | 1.70E-05 | 1 | LVLEVAQHLGENTVR           | 1.13E+08 | parkin null-Rep II |
| gij24638766 | FBgn0010217 | 559.98  | 1676.92 | 1676.92 | 0     | 0 | 55 | 3.30E-05 | 1 | LVLEVAQHLGENTVR           | 1.19E+08 | control-Rep I      |
| gij287945   | FBgn0010217 | 839.47  | 1676.92 | 1676.92 | 0     | 0 | 76 | 2.80E-07 | 1 | LVLEVAQHLGENTVR           | 1.23E+08 | control-Rep II     |
| gij287945   | FBgn0010217 | 839.47  | 1676.92 | 1676.92 | 0     | 0 | 76 | 3.00E-07 | 1 | LVLEVAQHLGENTVR           | 1.26E+08 | parkin null-Rep I  |
| gij287945   | FBgn0010217 | 887.14  | 2658.4  | 2658.38 | 0.02  | 1 | 64 | 3.60E-06 | 1 | SLQDIIAILGMDDELSEEDKLTVAR | 1.99E+07 | parkin null-Rep II |
| gij287945   | FBgn0010217 | 887.14  | 2658.41 | 2658.38 | 0.03  | 1 | 72 | 5.60E-07 | 1 | SLQDIIAILGMDDELSEEDKLTVAR | 2.27E+07 | parkin null-Rep I  |
| gij287945   | FBgn0010217 | 887.14  | 2658.39 | 2658.38 | 0.02  | 1 | 64 | 4.50E-06 | 1 | SLQDIIAILGMDDELSEEDKLTVAR | 2.57E+07 | control-Rep II     |
| gij24638766 | FBgn0010217 | 887.14  | 2658.39 | 2658.38 | 0.02  | 1 | 77 | 1.90E-07 | 1 | SLQDIIAILGMDDELSEEDKLTVAR | 3.28E+07 | control-Rep I      |
| gij287945   | FBgn0010217 | 729.43  | 1456.84 | 1456.83 | 0.01  | 0 | 68 | 1.40E-06 | 1 | TVLIMELINNVAK             | 2.59E+07 | parkin null-Rep I  |
| gij287945   | FBgn0010217 | 729.43  | 1456.84 | 1456.83 | 0.01  | 0 | 76 | 1.90E-07 | 1 | TVLIMELINNVAK             | 2.78E+07 | parkin null-Rep II |
| gij287945   | FBgn0010217 | 729.43  | 1456.84 | 1456.83 | 0.01  | 0 | 74 | 3.30E-07 | 1 | TVLIMELINNVAK             | 4.57E+07 | control-Rep II     |
| gij24638766 | FBgn0010217 | 729.42  | 1456.83 | 1456.83 | 0     | 0 | 83 | 4.40E-08 | 1 | TVLIMELINNVAK             | 4.84E+07 | control-Rep I      |
| gij287945   | FBgn0010217 | 720.4   | 1438.78 | 1438.78 | 0     | 0 | 78 | 2.10E-07 | 1 | VALTGLTVAEYFR             | 2.78E+07 | control-Rep II     |
| gij287945   | FBgn0010217 | 720.4   | 1438.79 | 1438.78 | 0     | 0 | 74 | 4.90E-07 | 1 | VALTGLTVAEYFR             | 3.26E+07 | parkin null-Rep II |
| gij287945   | FBgn0010217 | 720.4   | 1438.79 | 1438.78 | 0.01  | 0 | 76 | 2.90E-07 | 1 | VALTGLTVAEYFR             | 3.51E+07 | parkin null-Rep I  |
| gij24638766 | FBgn0010217 | 720.4   | 1438.78 | 1438.78 | 0     | 0 | 78 | 2.00E-07 | 1 | VALTGLTVAEYFR             | 4.57E+07 | control-Rep I      |
| gij287945   | FBgn0010217 | 801.41  | 1600.81 | 1600.8  | 0     | 0 | 31 | 0.024    | 1 | VALVYQMNEPPGAR            | 2.79E+06 | parkin null-Rep II |

|             |             |         |         |         |       |   |    |          |   |                        |          |                    |
|-------------|-------------|---------|---------|---------|-------|---|----|----------|---|------------------------|----------|--------------------|
| gij287945   | FBgn0010217 | 801.41  | 1600.81 | 1600.8  | 0.01  | 0 | 29 | 0.021    | 1 | VALVYQGMNEPPGAR        | 6.43E+06 | control-Rep II     |
| gij24638766 | FBgn0010217 | 801.42  | 1600.82 | 1600.8  | 0.01  | 0 | 31 | 0.012    | 1 | VALVYQGMNEPPGAR        | 7.32E+06 | control-Rep I      |
| gij25012868 | FBgn0010352 | 680.37  | 1358.73 | 1358.73 | 0     | 0 | 51 | 0.0003   | 1 | LIAEGTVTAEVVK          | 4.66E+06 | parkin null-Rep II |
| gij25012868 | FBgn0010352 | 680.37  | 1358.73 | 1358.73 | 0     | 0 | 55 | 9.70E-05 | 1 | LIAEGTVTAEVVK          | 4.87E+06 | control-Rep II     |
| gij25012868 | FBgn0010352 | 680.38  | 1358.75 | 1358.73 | 0.02  | 0 | 35 | 0.0087   | 1 | LIAEGTVTAEVVK          | 6.13E+06 | parkin null-Rep I  |
| gij28574585 | FBgn0010352 | 680.37  | 1358.73 | 1358.73 | 0     | 0 | 61 | 2.70E-05 | 1 | LIAEGTVTAEVVK          | 8.27E+06 | control-Rep I      |
| gij25012868 | FBgn0010352 | 759.92  | 1517.83 | 1517.81 | 0.01  | 0 | 29 | 0.018    | 1 | VEQISPPFDLVK           | 2.69E+06 | parkin null-Rep II |
| gij25012868 | FBgn0010352 | 759.92  | 1517.83 | 1517.81 | 0.01  | 0 | 33 | 0.0073   | 1 | VEQISPPFDLVK           | 3.06E+06 | control-Rep II     |
| gij25012868 | FBgn0010352 | 759.92  | 1517.83 | 1517.81 | 0.01  | 0 | 37 | 0.0029   | 1 | VEQISPPFDLVK           | 4.45E+06 | parkin null-Rep I  |
| gij28574585 | FBgn0010352 | 759.91  | 1517.81 | 1517.81 | 0     | 0 | 33 | 0.008    | 1 | VEQISPPFDLVK           | 5.88E+06 | control-Rep I      |
| gij25012868 | FBgn0010352 | 821.4   | 2461.18 | 2461.19 | -0.01 | 0 | 33 | 0.0095   | 1 | VVNAPIFHVNADDPEAVMHVCK | 4.66E+06 | control-Rep II     |
| gij28574585 | FBgn0010352 | 821.4   | 2461.19 | 2461.19 | 0     | 0 | 48 | 0.00014  | 1 | VVNAPIFHVNADDPEAVMHVCK | 5.57E+06 | control-Rep I      |
| gij481569   | FBgn0010424 | 705.34  | 1408.67 | 1408.65 | 0.01  | 0 | 48 | 0.0003   | 1 | FIVEEDAEAMQK           | 8.62E+06 | parkin null-Rep I  |
| gij481569   | FBgn0010424 | 705.33  | 1408.65 | 1408.65 | -0.01 | 0 | 52 | 8.70E-05 | 1 | FIVEEDAEAMQK           | 9.08E+06 | control-Rep II     |
| gij481569   | FBgn0010424 | 705.33  | 1408.65 | 1408.65 | -0.01 | 0 | 55 | 3.90E-05 | 1 | FIVEEDAEAMQK           | 1.26E+07 | parkin null-Rep II |
| gij481569   | FBgn0010424 | 705.33  | 1408.65 | 1408.65 | -0.01 | 0 | 56 | 3.10E-05 | 1 | FIVEEDAEAMQK           | 1.74E+07 | control-Rep I      |
| gij481569   | FBgn0010424 | 937.46  | 1872.91 | 1872.93 | -0.03 | 1 | 35 | 0.0063   | 1 | ILEELIEEVEDKSGR        | 1.67E+06 | control-Rep II     |
| gij481569   | FBgn0010424 | 625.32  | 1872.94 | 1872.93 | 0.01  | 1 | 53 | 0.00015  | 1 | ILEELIEEVEDKSGR        | 4.95E+06 | parkin null-Rep II |
| gij481569   | FBgn0010424 | 751.9   | 1501.79 | 1501.78 | 0.01  | 0 | 50 | 0.00015  | 1 | TGSIPTMVADILR          | 4.48E+07 | parkin null-Rep I  |
| gij481569   | FBgn0010424 | 751.9   | 1501.79 | 1501.78 | 0.01  | 0 | 61 | 1.40E-05 | 1 | TGSIPTMVADILR          | 4.57E+07 | parkin null-Rep II |
| gij481569   | FBgn0010424 | 751.91  | 1501.8  | 1501.78 | 0.02  | 0 | 68 | 2.20E-06 | 1 | TGSIPTMVADILR          | 4.60E+07 | control-Rep II     |
| gij481569   | FBgn0010424 | 751.9   | 1501.79 | 1501.78 | 0.01  | 0 | 67 | 3.30E-06 | 1 | TGSIPTMVADILR          | 6.20E+07 | control-Rep I      |
| gij24652801 | FBgn0010516 | 950.99  | 1899.97 | 1899.97 | 0.01  | 0 | 38 | 0.0021   | 1 | AAVDAGFVPNDLQIGQTGK    | 3.07E+06 | parkin null-Rep II |
| gij24652801 | FBgn0010516 | 950.99  | 1899.97 | 1899.97 | 0     | 0 | 54 | 5.80E-05 | 1 | AAVDAGFVPNDLQIGQTGK    | 3.43E+06 | control-Rep II     |
| gij24652801 | FBgn0010516 | 951     | 1899.99 | 1899.97 | 0.02  | 0 | 57 | 3.00E-05 | 1 | AAVDAGFVPNDLQIGQTGK    | 5.84E+06 | parkin null-Rep I  |
| gij24652801 | FBgn0010516 | 714.41  | 1426.8  | 1426.79 | 0.01  | 0 | 59 | 1.70E-05 | 1 | LDVSPISEIIDVK          | 3.72E+06 | parkin null-Rep II |
| gij24652801 | FBgn0010516 | 714.41  | 1426.81 | 1426.79 | 0.01  | 0 | 36 | 0.0046   | 1 | LDVSPISEIIDVK          | 5.57E+06 | control-Rep II     |
| gij24652801 | FBgn0010516 | 714.4   | 1426.79 | 1426.79 | -0.01 | 0 | 49 | 0.00028  | 1 | LDVSPISEIIDVK          | 6.25E+06 | parkin null-Rep I  |
| gij24658560 | FBgn0011211 | 789.07  | 2364.2  | 2364.17 | 0.03  | 0 | 70 | 1.20E-06 | 1 | EVAafaQFGSDldaATQLLNR  | 7.89E+06 | parkin null-Rep II |
| gij24658560 | FBgn0011211 | 789.07  | 2364.19 | 2364.17 | 0.02  | 0 | 68 | 1.90E-06 | 1 | EVAafaQFGSDldaATQLLNR  | 8.19E+06 | control-Rep II     |
| gij24658560 | FBgn0011211 | 789.08  | 2364.21 | 2364.17 | 0.04  | 0 | 52 | 7.40E-05 | 1 | EVAafaQFGSDldaATQLLNR  | 9.16E+06 | parkin null-Rep I  |
| gij24658560 | FBgn0011211 | 789.07  | 2364.19 | 2364.17 | 0.02  | 0 | 50 | 0.00012  | 1 | EVAafaQFGSDldaATQLLNR  | 9.60E+06 | control-Rep I      |
| gij24658560 | FBgn0011211 | 719.93  | 1437.84 | 1437.84 | 0     | 0 | 38 | 0.00072  | 1 | GIRPAINVGLSVSR         | 2.80E+07 | parkin null-Rep I  |
| gij24658560 | FBgn0011211 | 480.29  | 1437.85 | 1437.84 | 0     | 0 | 38 | 0.0009   | 1 | GIRPAINVGLSVSR         | 3.41E+07 | parkin null-Rep II |
| gij24658560 | FBgn0011211 | 719.93  | 1437.85 | 1437.84 | 0     | 0 | 41 | 0.00037  | 1 | GIRPAINVGLSVSR         | 4.00E+07 | control-Rep II     |
| gij24658560 | FBgn0011211 | 719.93  | 1437.84 | 1437.84 | 0     | 0 | 43 | 0.00025  | 1 | GIRPAINVGLSVSR         | 6.14E+07 | control-Rep I      |
| gij24658560 | FBgn0011211 | 1044.54 | 2087.07 | 2087.04 | 0.03  | 0 | 58 | 3.60E-05 | 1 | GMALNLEPDNVGVVVFGNDK   | 3.36E+06 | control-Rep II     |
| gij24658560 | FBgn0011211 | 1044.53 | 2087.05 | 2087.04 | 0.01  | 0 | 81 | 1.00E-07 | 1 | GMALNLEPDNVGVVVFGNDK   | 4.91E+06 | control-Rep I      |
| gij24658560 | FBgn0011211 | 1044.54 | 2087.06 | 2087.04 | 0.02  | 0 | 60 | 1.20E-05 | 1 | GMALNLEPDNVGVVVFGNDK   | 5.09E+06 | parkin null-Rep II |

|             |             |         |         |         |       |   |     |          |   |                        |          |                    |
|-------------|-------------|---------|---------|---------|-------|---|-----|----------|---|------------------------|----------|--------------------|
| gij24658560 | FBgn0011211 | 1044.52 | 2087.03 | 2087.04 | -0.01 | 0 | 60  | 2.00E-05 | 1 | GMALNLEPDNVGVVVFVGN DK | 5.13E+06 | parkin null-Rep I  |
| gij24658560 | FBgn0011211 | 644.35  | 1286.69 | 1286.69 | 0     | 0 | 49  | 0.00039  | 1 | HALIYDDL SK            | 2.65E+07 | parkin null-Rep II |
| gij24658560 | FBgn0011211 | 644.35  | 1286.69 | 1286.69 | 0     | 0 | 49  | 0.00041  | 1 | HALIYDDL SK            | 3.00E+07 | parkin null-Rep I  |
| gij24658560 | FBgn0011211 | 644.35  | 1286.69 | 1286.69 | 0     | 0 | 62  | 1.20E-05 | 1 | HALIYDDL SK            | 4.94E+07 | control-Rep I      |
| gij24658560 | FBgn0011211 | 630.82  | 1259.63 | 1259.64 | -0.01 | 0 | 35  | 0.0056   | 1 | SAEISNILEER            | 9.98E+06 | control-Rep II     |
| gij24658560 | FBgn0011211 | 630.82  | 1259.63 | 1259.64 | -0.01 | 0 | 36  | 0.0048   | 1 | SAEISNILEER            | 1.34E+07 | control-Rep I      |
| gij24658560 | FBgn0011211 | 650.88  | 1299.75 | 1299.74 | 0.01  | 0 | 71  | 8.90E-07 | 1 | TALAI DTIINQK          | 3.49E+07 | parkin null-Rep I  |
| gij24658560 | FBgn0011211 | 650.88  | 1299.75 | 1299.74 | 0.01  | 0 | 75  | 3.50E-07 | 1 | TALAI DTIINQK          | 3.88E+07 | control-Rep II     |
| gij24658560 | FBgn0011211 | 650.88  | 1299.74 | 1299.74 | 0     | 0 | 80  | 1.30E-07 | 1 | TALAI DTIINQK          | 4.07E+07 | parkin null-Rep II |
| gij24658560 | FBgn0011211 | 650.88  | 1299.75 | 1299.74 | 0.01  | 0 | 66  | 2.50E-06 | 1 | TALAI DTIINQK          | 4.85E+07 | control-Rep I      |
| gij24658560 | FBgn0011211 | 805.94  | 1609.87 | 1609.87 | 0.01  | 0 | 64  | 4.00E-06 | 1 | TGAI DV PVGDELLGR      | 8.68E+07 | parkin null-Rep II |
| gij24658560 | FBgn0011211 | 805.95  | 1609.88 | 1609.87 | 0.01  | 0 | 62  | 6.50E-06 | 1 | TGAI DV PVGDELLGR      | 9.52E+07 | parkin null-Rep I  |
| gij24658560 | FBgn0011211 | 805.94  | 1609.87 | 1609.87 | 0.01  | 0 | 57  | 2.30E-05 | 1 | TGAI DV PVGDELLGR      | 1.03E+08 | control-Rep II     |
| gij24658560 | FBgn0011211 | 805.94  | 1609.87 | 1609.87 | 0.01  | 0 | 58  | 1.90E-05 | 1 | TGAI DV PVGDELLGR      | 1.09E+08 | control-Rep I      |
| gij24658560 | FBgn0011211 | 645.35  | 1288.69 | 1288.69 | 0     | 0 | 72  | 1.80E-06 | 1 | TSEQALLDTIAK           | 6.12E+06 | control-Rep II     |
| gij24658560 | FBgn0011211 | 645.36  | 1288.7  | 1288.69 | 0.01  | 0 | 59  | 2.30E-05 | 1 | TSEQALLDTIAK           | 6.99E+06 | parkin null-Rep II |
| gij24658560 | FBgn0011211 | 645.35  | 1288.69 | 1288.69 | 0     | 0 | 69  | 3.80E-06 | 1 | TSEQALLDTIAK           | 9.80E+06 | control-Rep I      |
| gij28573630 | FBgn0011643 | 1034.46 | 2066.91 | 2066.92 | -0.02 | 0 | 85  | 1.30E-08 | 1 | YGFGGGAGCLSTDTGAHLNR   | 3.57E+07 | parkin null-Rep I  |
| gij28573630 | FBgn0011643 | 1034.47 | 2066.93 | 2066.92 | 0.01  | 0 | 80  | 5.40E-08 | 1 | YGFGGGAGCLSTDTGAHLNR   | 4.30E+07 | control-Rep II     |
| gij28573630 | FBgn0011643 | 689.98  | 2066.92 | 2066.92 | 0     | 0 | 45  | 0.00012  | 1 | YGFGGGAGCLSTDTGAHLNR   | 4.58E+07 | parkin null-Rep II |
| gij28573630 | FBgn0011643 | 733     | 2195.97 | 2195.97 | 0     | 1 | 55  | 1.30E-05 | 1 | YGFGGGAGCLSTDTGAHLNRE  | 8.24E+07 | control-Rep II     |
| gij28573630 | FBgn0011643 | 733     | 2195.96 | 2195.97 | 0     | 1 | 59  | 5.00E-06 | 1 | YGFGGGAGCLSTDTGAHLNRE  | 9.33E+07 | parkin null-Rep I  |
| gij28573630 | FBgn0011643 | 733     | 2195.97 | 2195.97 | 0     | 1 | 63  | 1.80E-06 | 1 | YGFGGGAGCLSTDTGAHLNRE  | 9.71E+07 | parkin null-Rep II |
| gij28573630 | FBgn0011643 | 733     | 2195.96 | 2195.97 | 0     | 1 | 49  | 4.10E-05 | 1 | YGFGGGAGCLSTDTGAHLNRE  | 9.81E+07 | control-Rep I      |
| gij3851652  | FBgn0011693 | 1149.02 | 2296.03 | 2296.02 | 0.01  | 0 | 100 | 6.90E-10 | 1 | FVTVCPGATMTDMFTNFTEK   | 4.16E+07 | parkin null-Rep II |
| gij3851652  | FBgn0011693 | 1149.02 | 2296.03 | 2296.02 | 0.01  | 0 | 105 | 2.20E-10 | 1 | FVTVCPGATMTDMFTNFTEK   | 4.69E+07 | parkin null-Rep I  |
| gij3851652  | FBgn0011693 | 1149.03 | 2296.04 | 2296.02 | 0.02  | 0 | 91  | 6.10E-09 | 1 | FVTVCPGATMTDMFTNFTEK   | 5.65E+07 | control-Rep II     |
| gij3851652  | FBgn0011693 | 1149.02 | 2296.03 | 2296.02 | 0.01  | 0 | 103 | 3.40E-10 | 1 | FVTVCPGATMTDMFTNFTEK   | 6.08E+07 | control-Rep I      |
| gij3851652  | FBgn0011693 | 605.3   | 1208.59 | 1208.59 | -0.01 | 0 | 36  | 0.0057   | 1 | GVEATYEEIAK            | 2.31E+06 | parkin null-Rep II |
| gij3851652  | FBgn0011693 | 605.3   | 1208.59 | 1208.59 | -0.01 | 0 | 52  | 0.00014  | 1 | GVEATYEEIAK            | 3.88E+06 | control-Rep II     |
| gij3851652  | FBgn0011693 | 605.31  | 1208.61 | 1208.59 | 0.01  | 0 | 48  | 0.00044  | 1 | GVEATYEEIAK            | 3.98E+06 | parkin null-Rep I  |
| gij3851652  | FBgn0011693 | 605.3   | 1208.59 | 1208.59 | -0.01 | 0 | 57  | 3.90E-05 | 1 | GVEATYEEIAK            | 6.46E+06 | control-Rep I      |
| gij3851652  | FBgn0011693 | 764.43  | 1526.85 | 1526.84 | 0.01  | 0 | 114 | 5.60E-11 | 1 | NAVVTGGAGGIGLQVSK      | 3.67E+07 | parkin null-Rep I  |
| gij3851652  | FBgn0011693 | 764.43  | 1526.84 | 1526.84 | 0     | 0 | 103 | 6.00E-10 | 1 | NAVVTGGAGGIGLQVSK      | 3.92E+07 | parkin null-Rep II |
| gij3851652  | FBgn0011693 | 764.43  | 1526.84 | 1526.84 | 0     | 0 | 95  | 4.40E-09 | 1 | NAVVTGGAGGIGLQVSK      | 5.14E+07 | control-Rep II     |
| gij3851652  | FBgn0011693 | 764.43  | 1526.84 | 1526.84 | 0     | 0 | 117 | 3.20E-11 | 1 | NAVVTGGAGGIGLQVSK      | 6.46E+07 | control-Rep I      |
| gij3851652  | FBgn0011693 | 1138.15 | 2274.28 | 2274.27 | 0.01  | 0 | 108 | 6.60E-11 | 1 | TLLVNLGGIINSTLSALPYMGK | 8.17E+06 | parkin null-Rep II |
| gij3851652  | FBgn0011693 | 1138.15 | 2274.28 | 2274.27 | 0.02  | 0 | 121 | 3.00E-12 | 1 | TLLVNLGGIINSTLSALPYMGK | 9.27E+06 | control-Rep II     |
| gij3851652  | FBgn0011693 | 1138.14 | 2274.26 | 2274.27 | -0.01 | 0 | 108 | 8.00E-11 | 1 | TLLVNLGGIINSTLSALPYMGK | 1.08E+07 | parkin null-Rep I  |

|             |             |         |         |         |       |   |     |          |   |                                      |          |                    |
|-------------|-------------|---------|---------|---------|-------|---|-----|----------|---|--------------------------------------|----------|--------------------|
| gij3851652  | FBgn0011693 | 1138.15 | 2274.28 | 2274.27 | 0.02  | 0 | 108 | 6.40E-11 | 1 | TLNVNLLGGIINSTLSALPYMGK              | 1.43E+07 | control-Rep I      |
| gij3851652  | FBgn0011693 | 873.47  | 1744.93 | 1744.92 | 0.01  | 0 | 72  | 7.90E-07 | 1 | VAIIDLQDNLEEFVK                      | 3.10E+07 | parkin null-Rep I  |
| gij3851652  | FBgn0011693 | 873.48  | 1744.94 | 1744.92 | 0.02  | 0 | 91  | 9.50E-09 | 1 | VAIIDLQDNLEEFVK                      | 3.54E+07 | parkin null-Rep II |
| gij3851652  | FBgn0011693 | 873.47  | 1744.93 | 1744.92 | 0.01  | 0 | 68  | 2.30E-06 | 1 | VAIIDLQDNLEEFVK                      | 5.91E+07 | control-Rep I      |
| gij3851652  | FBgn0011693 | 873.47  | 1744.93 | 1744.92 | 0     | 0 | 68  | 2.30E-06 | 1 | VAIIDLQDNLEEFVK                      | 9.91E+07 | control-Rep II     |
| gij17136986 | FBgn0011726 | 734.85  | 1467.69 | 1467.69 | 0     | 0 | 51  | 5.50E-05 | 1 | LFLMSWCPDTAK                         | 2.57E+07 | parkin null-Rep II |
| gij17136986 | FBgn0011726 | 734.86  | 1467.71 | 1467.69 | 0.02  | 0 | 71  | 8.70E-07 | 1 | LFLMSWCPDTAK                         | 2.65E+07 | control-Rep II     |
| gij17136986 | FBgn0011726 | 734.85  | 1467.69 | 1467.69 | 0     | 0 | 56  | 2.00E-05 | 1 | LFLMSWCPDTAK                         | 2.65E+07 | parkin null-Rep I  |
| gij17136986 | FBgn0011726 | 734.86  | 1467.71 | 1467.69 | 0.02  | 0 | 64  | 3.80E-06 | 1 | LFLMSWCPDTAK                         | 3.19E+07 | control-Rep I      |
| gij17136986 | FBgn0011726 | 806.89  | 1611.76 | 1611.74 | 0.02  | 0 | 52  | 5.40E-05 | 1 | NAEYDQFLEDIQK                        | 7.23E+07 | control-Rep II     |
| gij17136986 | FBgn0011726 | 806.88  | 1611.75 | 1611.74 | 0.01  | 0 | 44  | 0.00034  | 1 | NAEYDQFLEDIQK                        | 7.30E+07 | parkin null-Rep II |
| gij17136986 | FBgn0011726 | 806.88  | 1611.75 | 1611.74 | 0     | 0 | 52  | 4.70E-05 | 1 | NAEYDQFLEDIQK                        | 8.35E+07 | parkin null-Rep I  |
| gij17136986 | FBgn0011726 | 806.88  | 1611.74 | 1611.74 | 0     | 0 | 60  | 6.10E-06 | 1 | NAEYDQFLEDIQK                        | 8.39E+07 | control-Rep I      |
| gij17136986 | FBgn0011726 | 573.3   | 1144.59 | 1144.57 | 0.01  | 0 | 30  | 0.032    | 1 | QIDVETVADR                           | 3.61E+06 | parkin null-Rep II |
| gij17136986 | FBgn0011726 | 573.29  | 1144.57 | 1144.57 | -0.01 | 0 | 29  | 0.036    | 1 | QIDVETVADR                           | 4.29E+06 | control-Rep II     |
| gij17136986 | FBgn0011726 | 573.3   | 1144.59 | 1144.57 | 0.01  | 0 | 32  | 0.02     | 1 | QIDVETVADR                           | 5.37E+06 | parkin null-Rep I  |
| gij17136986 | FBgn0011726 | 573.29  | 1144.57 | 1144.57 | -0.01 | 0 | 39  | 0.0035   | 1 | QIDVETVADR                           | 8.45E+06 | control-Rep I      |
| gij17136986 | FBgn0011726 | 677.34  | 1352.67 | 1352.66 | 0.01  | 0 | 63  | 1.30E-05 | 1 | YIQATDLSEASR                         | 5.31E+06 | parkin null-Rep II |
| gij17136986 | FBgn0011726 | 677.34  | 1352.67 | 1352.66 | 0.01  | 0 | 56  | 7.10E-05 | 1 | YIQATDLSEASR                         | 5.95E+06 | parkin null-Rep I  |
| gij17136986 | FBgn0011726 | 677.34  | 1352.67 | 1352.66 | 0.01  | 0 | 60  | 3.00E-05 | 1 | YIQATDLSEASR                         | 7.48E+06 | control-Rep II     |
| gij929571   | FBgn0013334 | 987.76  | 2960.27 | 2960.29 | -0.02 | 1 | 82  | 1.00E-08 | 1 | KGAGADGAEGAEGAVAGEGGAASGAVSGGEDDDK   | 5.27E+06 | parkin null-Rep I  |
| gij929571   | FBgn0013334 | 987.77  | 2960.28 | 2960.29 | -0.01 | 1 | 83  | 1.00E-08 | 1 | KGAGADGAEGAEGAVAGEGGAASGAVSGGEDDDK   | 8.15E+06 | parkin null-Rep II |
| gij929571   | FBgn0013334 | 987.77  | 2960.28 | 2960.29 | -0.01 | 1 | 60  | 1.60E-06 | 1 | KGAGADGAEGAEGAVAGEGGAASGAVSGGEDDDK   | 1.11E+07 | control-Rep II     |
| gij929571   | FBgn0013334 | 1068.8  | 3203.38 | 3203.42 | -0.04 | 2 | 97  | 1.70E-10 | 1 | KGAGADGAEGAEGAVAGEGGAASGAVSGGEDDDKSR | 1.63E+06 | parkin null-Rep II |
| gij929571   | FBgn0013334 | 1068.82 | 3203.44 | 3203.42 | 0.02  | 2 | 121 | 2.20E-12 | 1 | KGAGADGAEGAEGAVAGEGGAASGAVSGGEDDDKSR | 1.73E+06 | control-Rep II     |
| gij929571   | FBgn0013334 | 1068.8  | 3203.38 | 3203.42 | -0.04 | 2 | 63  | 4.90E-07 | 1 | KGAGADGAEGAEGAVAGEGGAASGAVSGGEDDDKSR | 2.50E+06 | control-Rep I      |
| gij27819775 | FBgn0014002 | 718.87  | 1435.73 | 1435.72 | 0.01  | 0 | 63  | 8.30E-06 | 1 | DLTSVADAEQFLK                        | 1.02E+07 | parkin null-Rep I  |
| gij27819775 | FBgn0014002 | 718.87  | 1435.72 | 1435.72 | 0     | 0 | 53  | 8.20E-05 | 1 | DLTSVADAEQFLK                        | 1.08E+07 | control-Rep I      |
| gij27819775 | FBgn0014002 | 718.87  | 1435.73 | 1435.72 | 0.01  | 0 | 61  | 1.40E-05 | 1 | DLTSVADAEQFLK                        | 1.11E+07 | parkin null-Rep II |
| gij27819775 | FBgn0014002 | 718.87  | 1435.72 | 1435.72 | 0.01  | 0 | 55  | 5.00E-05 | 1 | DLTSVADAEQFLK                        | 1.26E+07 | control-Rep II     |
| gij27819775 | FBgn0014002 | 744.06  | 2229.16 | 2229.14 | 0.02  | 0 | 32  | 0.0084   | 1 | FAQQVSLPLIVDFNHESASK                 | 1.06E+07 | control-Rep II     |
| gij27819775 | FBgn0014002 | 744.06  | 2229.16 | 2229.14 | 0.01  | 0 | 33  | 0.0068   | 1 | FAQQVSLPLIVDFNHESASK                 | 1.10E+07 | parkin null-Rep II |
| gij27819775 | FBgn0014002 | 760.41  | 1518.81 | 1518.79 | 0.01  | 0 | 52  | 0.00018  | 1 | VEEGLVATVDNFK                        | 1.55E+06 | parkin null-Rep II |
| gij27819775 | FBgn0014002 | 760.41  | 1518.8  | 1518.79 | 0.01  | 0 | 44  | 0.00072  | 1 | VEEGLVATVDNFK                        | 6.41E+06 | control-Rep I      |
| gij27819775 | FBgn0014002 | 686.01  | 2055.01 | 2055    | 0     | 0 | 56  | 3.30E-05 | 1 | YKPESDDLSAETIEAFLK                   | 4.00E+06 | control-Rep II     |
| gij27819775 | FBgn0014002 | 686.01  | 2055.01 | 2055    | 0     | 0 | 53  | 5.80E-05 | 1 | YKPESDDLSAETIEAFLK                   | 4.61E+06 | control-Rep I      |
| gij27819775 | FBgn0014002 | 686.01  | 2055.01 | 2055    | 0     | 0 | 47  | 0.00026  | 1 | YKPESDDLSAETIEAFLK                   | 5.27E+06 | parkin null-Rep II |
| gij38048327 | FBgn0015222 | 921.02  | 1840.02 | 1839.99 | 0.02  | 0 | 45  | 0.00027  | 1 | GQLTEGVSDLINPTVAK                    | 1.03E+07 | parkin null-Rep II |
| gij6409189  | FBgn0015222 | 921.01  | 1840.01 | 1839.99 | 0.01  | 0 | 65  | 2.70E-06 | 1 | GQLTEGVSDLINPTVAK                    | 1.27E+07 | control-Rep II     |

|             |             |         |         |         |       |   |     |          |   |                                     |          |                    |
|-------------|-------------|---------|---------|---------|-------|---|-----|----------|---|-------------------------------------|----------|--------------------|
| gil6409189  | FBgn0015222 | 921.01  | 1840.01 | 1839.99 | 0.01  | 0 | 33  | 0.0043   | 1 | GQLTEGVSDLINVPTVAK                  | 1.39E+07 | control-Rep I      |
| gil6409189  | FBgn0015222 | 921.01  | 1840.01 | 1839.99 | 0.01  | 0 | 58  | 1.60E-05 | 1 | GQLTEGVSDLINVPTVAK                  | 1.78E+07 | parkin null-Rep I  |
| gil6409189  | FBgn0015222 | 873.89  | 1745.77 | 1745.76 | 0     | 0 | 78  | 5.30E-08 | 1 | MMDTNGELGEFLFDK                     | 1.88E+06 | control-Rep I      |
| gil6409189  | FBgn0015222 | 873.89  | 1745.77 | 1745.76 | 0     | 0 | 95  | 9.30E-10 | 1 | MMDTNGELGEFLFDK                     | 3.06E+06 | control-Rep II     |
| gil6409189  | FBgn0015222 | 873.89  | 1745.77 | 1745.76 | 0     | 0 | 85  | 1.00E-08 | 1 | MMDTNGELGEFLFDK                     | 3.86E+06 | parkin null-Rep I  |
| gil24641193 | FBgn0015245 | 955.54  | 1909.07 | 1909.06 | 0     | 0 | 49  | 0.00018  | 1 | ISSVQSIIPALELANAQR                  | 3.26E+06 | control-Rep I      |
| gil24641193 | FBgn0015245 | 955.54  | 1909.07 | 1909.06 | 0.01  | 0 | 54  | 3.70E-05 | 1 | ISSVQSIIPALELANAQR                  | 5.72E+06 | parkin null-Rep II |
| gil33636453 | FBgn0015245 | 955.55  | 1909.09 | 1909.06 | 0.02  | 0 | 50  | 7.50E-05 | 1 | ISSVQSIIPALELANAQR                  | 6.27E+06 | control-Rep II     |
| gil24641193 | FBgn0015245 | 1280.63 | 2559.25 | 2559.24 | 0     | 0 | 154 | 7.10E-15 | 1 | LVQDVANNTNEEAGDGTATVTLAR            | 1.80E+06 | parkin null-Rep I  |
| gil33636453 | FBgn0015245 | 1280.62 | 2559.23 | 2559.24 | -0.01 | 0 | 122 | 6.60E-12 | 1 | LVQDVANNTNEEAGDGTATVTLAR            | 3.79E+06 | control-Rep II     |
| gil24641193 | FBgn0015245 | 1280.62 | 2559.23 | 2559.24 | -0.01 | 0 | 121 | 8.50E-12 | 1 | LVQDVANNTNEEAGDGTATVTLAR            | 7.96E+06 | control-Rep I      |
| gil24641193 | FBgn0015245 | 566.3   | 1130.59 | 1130.58 | 0.01  | 0 | 33  | 0.016    | 1 | NAGVDGAMVVAK                        | 1.96E+06 | parkin null-Rep I  |
| gil24641193 | FBgn0015245 | 566.3   | 1130.59 | 1130.58 | 0.01  | 0 | 32  | 0.02     | 1 | NAGVDGAMVVAK                        | 2.00E+06 | parkin null-Rep II |
| gil33636453 | FBgn0015245 | 566.29  | 1130.57 | 1130.58 | 0     | 0 | 41  | 0.0011   | 1 | NAGVDGAMVVAK                        | 2.87E+06 | control-Rep II     |
| gil24641193 | FBgn0015245 | 566.3   | 1130.58 | 1130.58 | 0     | 0 | 26  | 0.053    | 1 | NAGVDGAMVVAK                        | 3.63E+06 | control-Rep I      |
| gil24641193 | FBgn0015245 | 820.12  | 2457.33 | 2457.32 | 0.01  | 0 | 71  | 7.20E-07 | 1 | TAITDASGVASLLTAEAVVTEIPK            | 6.11E+06 | control-Rep I      |
| gil33636453 | FBgn0015245 | 820.12  | 2457.34 | 2457.32 | 0.02  | 0 | 73  | 4.10E-07 | 1 | TAITDASGVASLLTAEAVVTEIPK            | 7.27E+06 | control-Rep II     |
| gil24641193 | FBgn0015245 | 820.12  | 2457.35 | 2457.32 | 0.02  | 0 | 73  | 3.20E-07 | 1 | TAITDASGVASLLTAEAVVTEIPK            | 7.45E+06 | parkin null-Rep II |
| gil24641193 | FBgn0015245 | 739.38  | 1476.75 | 1476.74 | 0.01  | 0 | 71  | 2.20E-06 | 1 | TLTDELEVIEGMK                       | 7.85E+06 | parkin null-Rep I  |
| gil24641193 | FBgn0015245 | 739.38  | 1476.74 | 1476.74 | 0     | 0 | 73  | 6.70E-07 | 1 | TLTDELEVIEGMK                       | 8.45E+06 | parkin null-Rep II |
| gil33636453 | FBgn0015245 | 739.38  | 1476.74 | 1476.74 | 0     | 0 | 68  | 2.20E-06 | 1 | TLTDELEVIEGMK                       | 8.84E+06 | control-Rep II     |
| gil24641193 | FBgn0015245 | 739.38  | 1476.75 | 1476.74 | 0.01  | 0 | 68  | 4.90E-06 | 1 | TLTDELEVIEGMK                       | 1.07E+07 | control-Rep I      |
| gil24641193 | FBgn0015245 | 1210.6  | 3628.78 | 3628.81 | -0.03 | 0 | 70  | 2.30E-06 | 1 | TMSRPVSTPEEIAQVATISANGDQAIGNLISEAMK | 5.21E+05 | parkin null-Rep II |
| gil24641193 | FBgn0015245 | 1210.62 | 3628.84 | 3628.81 | 0.03  | 0 | 71  | 1.70E-06 | 1 | TMSRPVSTPEEIAQVATISANGDQAIGNLISEAMK | 1.14E+06 | control-Rep I      |
| gil24641193 | FBgn0015245 | 617.3   | 1232.59 | 1232.59 | 0     | 0 | 70  | 1.40E-06 | 1 | VGSSEVEVNEK                         | 1.14E+06 | parkin null-Rep II |
| gil24641193 | FBgn0015245 | 617.3   | 1232.59 | 1232.59 | 0     | 0 | 65  | 4.60E-06 | 1 | VGSSEVEVNEK                         | 1.15E+06 | parkin null-Rep I  |
| gil24641193 | FBgn0015245 | 617.3   | 1232.58 | 1232.59 | -0.01 | 0 | 77  | 2.40E-07 | 1 | VGSSEVEVNEK                         | 1.46E+06 | control-Rep I      |
| gil33636453 | FBgn0015245 | 617.3   | 1232.59 | 1232.59 | 0     | 0 | 70  | 1.40E-06 | 1 | VGSSEVEVNEK                         | 1.65E+06 | control-Rep II     |
| gil24644298 | FBgn0015324 | 778.7   | 2333.08 | 2333.07 | 0.01  | 1 | 29  | 0.012    | 1 | HMMAFIEQEANEKAEIIDAK                | 4.88E+06 | parkin null-Rep II |
| gil24644298 | FBgn0015324 | 778.7   | 2333.08 | 2333.07 | 0.01  | 1 | 30  | 0.0079   | 1 | HMMAFIEQEANEKAEIIDAK                | 7.48E+06 | parkin null-Rep I  |
| gil24644298 | FBgn0015324 | 762.45  | 1522.88 | 1522.87 | 0.01  | 0 | 38  | 0.00087  | 1 | LDLISQQLVPEIR                       | 2.36E+07 | parkin null-Rep II |
| gil24644298 | FBgn0015324 | 762.45  | 1522.89 | 1522.87 | 0.01  | 0 | 42  | 0.00028  | 1 | LDLISQQLVPEIR                       | 2.37E+07 | control-Rep II     |
| gil24644298 | FBgn0015324 | 762.45  | 1522.88 | 1522.87 | 0.01  | 0 | 53  | 3.00E-05 | 1 | LDLISQQLVPEIR                       | 2.67E+07 | parkin null-Rep I  |
| gil24644298 | FBgn0015324 | 762.45  | 1522.88 | 1522.87 | 0.01  | 0 | 36  | 0.0015   | 1 | LDLISQQLVPEIR                       | 3.04E+07 | control-Rep I      |
| gil17137260 | FBgn0016119 | 687.87  | 1373.73 | 1373.72 | 0.01  | 0 | 47  | 0.00038  | 1 | ASDPIQQLFLDK                        | 1.35E+07 | parkin null-Rep II |
| gil17137260 | FBgn0016119 | 687.87  | 1373.73 | 1373.72 | 0.01  | 0 | 46  | 0.00046  | 1 | ASDPIQQLFLDK                        | 1.45E+07 | parkin null-Rep I  |
| gil17137260 | FBgn0016119 | 687.87  | 1373.73 | 1373.72 | 0.01  | 0 | 45  | 0.00064  | 1 | ASDPIQQLFLDK                        | 1.76E+07 | control-Rep II     |
| gil17137260 | FBgn0016119 | 687.87  | 1373.72 | 1373.72 | 0     | 0 | 43  | 0.001    | 1 | ASDPIQQLFLDK                        | 2.21E+07 | control-Rep I      |
| gil17137260 | FBgn0016119 | 627.31  | 1252.61 | 1252.61 | 0     | 0 | 38  | 0.002    | 1 | FPEFQFPDVK                          | 2.13E+07 | parkin null-Rep I  |

|             |             |         |         |         |       |   |    |          |   |                     |          |                    |
|-------------|-------------|---------|---------|---------|-------|---|----|----------|---|---------------------|----------|--------------------|
| gil17137260 | FBgn0016119 | 627.32  | 1252.62 | 1252.61 | 0.01  | 0 | 43 | 0.0006   | 1 | FPEFQFPDVK          | 2.15E+07 | parkin null-Rep II |
| gil17137260 | FBgn0016119 | 627.32  | 1252.62 | 1252.61 | 0     | 0 | 31 | 0.0092   | 1 | FPEFQFPDVK          | 2.64E+07 | control-Rep II     |
| gil17137260 | FBgn0016119 | 627.31  | 1252.61 | 1252.61 | 0     | 0 | 44 | 0.00049  | 1 | FPEFQFPDVK          | 3.14E+07 | control-Rep I      |
| gil1490232  | FBgn0016120 | 1043.51 | 2085    | 2085    | 0     | 0 | 77 | 2.00E-07 | 1 | AVLANPECPPQIDWANYK  | 1.17E+07 | parkin null-Rep II |
| gil1490232  | FBgn0016120 | 1043.5  | 2084.99 | 2085    | -0.01 | 0 | 80 | 7.70E-08 | 1 | AVLANPECPPQIDWANYK  | 1.24E+07 | control-Rep II     |
| gil1490232  | FBgn0016120 | 1043.51 | 2085    | 2085    | 0     | 0 | 74 | 4.00E-07 | 1 | AVLANPECPPQIDWANYK  | 1.28E+07 | parkin null-Rep I  |
| gil1490232  | FBgn0016120 | 686.89  | 1371.77 | 1371.78 | -0.01 | 0 | 45 | 0.00048  | 1 | LVPVAGLVDSFQK       | 4.12E+07 | parkin null-Rep II |
| gil1490232  | FBgn0016120 | 686.9   | 1371.78 | 1371.78 | 0     | 0 | 41 | 0.001    | 1 | LVPVAGLVDSFQK       | 4.29E+07 | parkin null-Rep I  |
| gil1490232  | FBgn0016120 | 686.9   | 1371.78 | 1371.78 | 0.01  | 0 | 49 | 0.00015  | 1 | LVPVAGLVDSFQK       | 4.99E+07 | control-Rep II     |
| gil1490232  | FBgn0016120 | 686.89  | 1371.77 | 1371.78 | 0     | 0 | 37 | 0.0024   | 1 | LVPVAGLVDSFQK       | 5.15E+07 | control-Rep I      |
| gil1490232  | FBgn0016120 | 488.57  | 1462.69 | 1462.68 | 0.01  | 1 | 26 | 0.025    | 1 | SKEQLEAEAQGHH       | 3.58E+05 | control-Rep I      |
| gil1490232  | FBgn0016120 | 488.57  | 1462.69 | 1462.68 | 0.01  | 1 | 21 | 0.071    | 1 | SKEQLEAEAQGHH       | 3.70E+05 | parkin null-Rep II |
| gil1490232  | FBgn0016120 | 488.57  | 1462.69 | 1462.68 | 0.01  | 1 | 40 | 0.00093  | 1 | SKEQLEAEAQGHH       | 4.33E+05 | parkin null-Rep I  |
| gil1490232  | FBgn0016120 | 488.57  | 1462.69 | 1462.68 | 0.01  | 1 | 31 | 0.0073   | 1 | SKEQLEAEAQGHH       | 5.06E+05 | control-Rep II     |
| gil1490232  | FBgn0016120 | 881.39  | 1760.77 | 1760.77 | -0.01 | 0 | 49 | 3.70E-05 | 1 | SLLPYDQMTMEDYR      | 1.11E+07 | parkin null-Rep II |
| gil1490232  | FBgn0016120 | 881.4   | 1760.78 | 1760.77 | 0.01  | 0 | 50 | 3.60E-05 | 1 | SLLPYDQMTMEDYR      | 1.36E+07 | parkin null-Rep I  |
| gil1490232  | FBgn0016120 | 881.4   | 1760.78 | 1760.77 | 0     | 0 | 42 | 0.00023  | 1 | SLLPYDQMTMEDYR      | 1.45E+07 | control-Rep II     |
| gil1490232  | FBgn0016120 | 881.39  | 1760.77 | 1760.77 | -0.01 | 0 | 41 | 0.00039  | 1 | SLLPYDQMTMEDYR      | 1.59E+07 | control-Rep I      |
| gil1490232  | FBgn0016120 | 538.29  | 1074.56 | 1074.56 | 0     | 0 | 41 | 0.0015   | 1 | VSSQVDAEIK          | 4.79E+06 | parkin null-Rep II |
| gil1490232  | FBgn0016120 | 538.29  | 1074.56 | 1074.56 | 0     | 0 | 42 | 0.0014   | 1 | VSSQVDAEIK          | 6.64E+06 | parkin null-Rep I  |
| gil1490232  | FBgn0016120 | 538.29  | 1074.56 | 1074.56 | 0     | 0 | 37 | 0.0034   | 1 | VSSQVDAEIK          | 7.36E+06 | control-Rep II     |
| gil1490232  | FBgn0016120 | 538.28  | 1074.55 | 1074.56 | 0     | 0 | 37 | 0.0038   | 1 | VSSQVDAEIK          | 9.78E+06 | control-Rep I      |
| gil24647054 | FBgn0016691 | 871.49  | 1740.97 | 1740.95 | 0.01  | 0 | 69 | 2.00E-06 | 1 | FAPATVNLLGLLADNGR   | 4.96E+06 | parkin null-Rep I  |
| gil1490236  | FBgn0016691 | 871.49  | 1740.97 | 1740.95 | 0.02  | 0 | 74 | 4.00E-07 | 1 | FAPATVNLLGLLADNGR   | 7.03E+06 | parkin null-Rep II |
| gil1490236  | FBgn0016691 | 871.49  | 1740.97 | 1740.95 | 0.01  | 0 | 73 | 4.90E-07 | 1 | FAPATVNLLGLLADNGR   | 1.46E+07 | control-Rep I      |
| gil24647054 | FBgn0016691 | 871.49  | 1740.97 | 1740.95 | 0.01  | 0 | 80 | 1.00E-07 | 1 | FAPATVNLLGLLADNGR   | 1.47E+07 | control-Rep II     |
| gil1490236  | FBgn0016691 | 673.01  | 2016.02 | 2016.02 | 0     | 0 | 47 | 0.00026  | 1 | GEVVCEVVTAKPLDASQSK | 4.71E+06 | parkin null-Rep II |
| gil24647054 | FBgn0016691 | 673.01  | 2016.01 | 2016.02 | -0.01 | 0 | 43 | 0.00068  | 1 | GEVVCEVVTAKPLDASQSK | 8.22E+06 | control-Rep II     |
| gil1490236  | FBgn0016691 | 673.01  | 2016.02 | 2016.02 | 0     | 0 | 38 | 0.0022   | 1 | GEVVCEVVTAKPLDASQSK | 1.17E+07 | control-Rep I      |
| gil7511958  | FBgn0016724 | 670.85  | 1339.69 | 1339.69 | -0.01 | 0 | 60 | 1.90E-05 | 1 | AFQLALDYPPFR        | 1.01E+07 | control-Rep I      |
| gil7511958  | FBgn0016724 | 670.85  | 1339.69 | 1339.69 | -0.01 | 0 | 44 | 0.00062  | 1 | AFQLALDYPPFR        | 1.19E+07 | control-Rep II     |
| gil7511958  | FBgn0016724 | 670.85  | 1339.69 | 1339.69 | 0     | 0 | 53 | 6.80E-05 | 1 | AFQLALDYPPFR        | 1.22E+07 | parkin null-Rep II |
| gil7511958  | FBgn0016724 | 670.86  | 1339.71 | 1339.69 | 0.01  | 0 | 40 | 0.0015   | 1 | AFQLALDYPPFR        | 1.63E+07 | parkin null-Rep I  |
| gil7511958  | FBgn0016724 | 636.7   | 1907.08 | 1907.07 | 0.01  | 0 | 45 | 0.00018  | 1 | AIGEIVKPINDAAQEVIK  | 7.68E+06 | control-Rep II     |
| gil7511958  | FBgn0016724 | 636.7   | 1907.08 | 1907.07 | 0.01  | 0 | 40 | 0.00053  | 1 | AIGEIVKPINDAAQEVIK  | 1.07E+07 | parkin null-Rep I  |
| gil7511958  | FBgn0016724 | 459.77  | 917.53  | 917.52  | 0.01  | 0 | 28 | 0.02     | 1 | AQLTGSITK           | 5.01E+05 | parkin null-Rep II |
| gil7511958  | FBgn0016724 | 459.77  | 917.52  | 917.52  | 0     | 0 | 24 | 0.06     | 1 | AQLTGSITK           | 9.06E+05 | control-Rep II     |
| gil7511958  | FBgn0016724 | 459.77  | 917.53  | 917.52  | 0.01  | 0 | 27 | 0.024    | 1 | AQLTGSITK           | 9.51E+05 | parkin null-Rep I  |
| gil7511958  | FBgn0016724 | 459.76  | 917.51  | 917.52  | -0.01 | 0 | 22 | 0.13     | 1 | AQLTGSITK           | 1.12E+06 | control-Rep I      |

|            |             |         |         |         |       |   |    |          |   |                                 |          |                    |
|------------|-------------|---------|---------|---------|-------|---|----|----------|---|---------------------------------|----------|--------------------|
| gi 7511958 | FBgn0016724 | 704.33  | 1406.64 | 1406.64 | 0     | 0 | 22 | 0.039    | 1 | DFGYPYEFELK                     | 8.45E+06 | control-Rep II     |
| gi 7511958 | FBgn0016724 | 704.33  | 1406.65 | 1406.64 | 0.01  | 0 | 21 | 0.1      | 1 | DFGYPYEFELK                     | 1.13E+07 | parkin null-Rep I  |
| gi 7511958 | FBgn0016724 | 465.28  | 1392.82 | 1392.81 | 0.01  | 0 | 49 | 0.00043  | 1 | FDGALIHLIAPVK                   | 5.86E+06 | control-Rep II     |
| gi 7511958 | FBgn0016724 | 465.28  | 1392.82 | 1392.81 | 0.01  | 0 | 49 | 0.00039  | 1 | FDGALIHLIAPVK                   | 8.21E+06 | parkin null-Rep I  |
| gi 7511958 | FBgn0016724 | 465.28  | 1392.81 | 1392.81 | 0     | 0 | 35 | 0.0017   | 1 | FDGALIHLIAPVK                   | 8.55E+06 | control-Rep I      |
| gi 7511958 | FBgn0016724 | 623.32  | 1244.63 | 1244.61 | 0.01  | 0 | 27 | 0.056    | 1 | GIHTQEAFSQK                     | 2.94E+05 | parkin null-Rep I  |
| gi 7511958 | FBgn0016724 | 415.88  | 1244.62 | 1244.61 | 0     | 0 | 24 | 0.065    | 1 | GIHTQEAFSQK                     | 4.95E+05 | parkin null-Rep II |
| gi 7511958 | FBgn0016724 | 660.31  | 1318.61 | 1318.62 | -0.01 | 0 | 39 | 0.0016   | 1 | HAQDYSLEASAK                    | 1.74E+06 | parkin null-Rep II |
| gi 7511958 | FBgn0016724 | 660.31  | 1318.62 | 1318.62 | 0     | 0 | 63 | 3.70E-06 | 1 | HAQDYSLEASAK                    | 2.22E+06 | parkin null-Rep I  |
| gi 7511958 | FBgn0016724 | 660.32  | 1318.62 | 1318.62 | 0     | 0 | 58 | 1.30E-05 | 1 | HAQDYSLEASAK                    | 2.25E+06 | control-Rep II     |
| gi 7511958 | FBgn0016724 | 660.31  | 1318.61 | 1318.62 | 0     | 0 | 57 | 1.80E-05 | 1 | HAQDYSLEASAK                    | 2.64E+06 | control-Rep I      |
| gi 7511958 | FBgn0016724 | 957.53  | 1913.05 | 1913.03 | 0.02  | 0 | 78 | 3.90E-07 | 1 | IVNHLEIENVQLTETYSK              | 5.20E+06 | control-Rep II     |
| gi 7511958 | FBgn0016724 | 957.52  | 1913.02 | 1913.03 | 0     | 0 | 56 | 6.70E-05 | 1 | IVNHLEIENVQLTETYSK              | 8.33E+06 | parkin null-Rep II |
| gi 7511958 | FBgn0016724 | 1180.59 | 3538.75 | 3538.74 | 0.01  | 0 | 59 | 2.00E-05 | 1 | LFGSELAFSLGDNIPSSLDDIINYFSTSFEK | 1.69E+05 | control-Rep II     |
| gi 7511958 | FBgn0016724 | 1180.6  | 3538.78 | 3538.74 | 0.04  | 0 | 79 | 2.30E-07 | 1 | LFGSELAFSLGDNIPSSLDDIINYFSTSFEK | 5.37E+05 | parkin null-Rep II |
| gi 7511958 | FBgn0016724 | 841.45  | 1680.89 | 1680.88 | 0.02  | 0 | 91 | 1.00E-08 | 1 | MLNQITSSLADTLFK                 | 3.49E+07 | control-Rep II     |
| gi 7511958 | FBgn0016724 | 841.45  | 1680.89 | 1680.88 | 0.01  | 0 | 92 | 8.80E-09 | 1 | MLNQITSSLADTLFK                 | 3.71E+07 | control-Rep I      |
| gi 7511958 | FBgn0016724 | 841.45  | 1680.88 | 1680.88 | 0.01  | 0 | 93 | 6.50E-09 | 1 | MLNQITSSLADTLFK                 | 3.90E+07 | parkin null-Rep II |
| gi 7511958 | FBgn0016724 | 841.45  | 1680.88 | 1680.88 | 0     | 0 | 90 | 1.20E-08 | 1 | MLNQITSSLADTLFK                 | 4.62E+07 | parkin null-Rep I  |
| gi 7511958 | FBgn0016724 | 666.34  | 1995.99 | 1995.99 | 0     | 0 | 39 | 0.0018   | 1 | QSDSETLLELAAPHPNPK              | 1.78E+07 | control-Rep II     |
| gi 7511958 | FBgn0016724 | 666.34  | 1996.01 | 1995.99 | 0.01  | 0 | 34 | 0.0057   | 1 | QSDSETLLELAAPHPNPK              | 1.85E+07 | parkin null-Rep I  |
| gi 7511958 | FBgn0016724 | 666.34  | 1996    | 1995.99 | 0.01  | 0 | 44 | 0.00064  | 1 | QSDSETLLELAAPHPNPK              | 2.01E+07 | parkin null-Rep II |
| gi 7511958 | FBgn0016724 | 666.34  | 1996    | 1995.99 | 0.01  | 0 | 41 | 0.0011   | 1 | QSDSETLLELAAPHPNPK              | 2.42E+07 | control-Rep I      |
| gi 7511958 | FBgn0016724 | 460.24  | 1377.69 | 1377.69 | 0.01  | 1 | 38 | 0.003    | 1 | RQDFIDGTAEVK                    | 3.60E+06 | parkin null-Rep II |
| gi 7511958 | FBgn0016724 | 689.85  | 1377.69 | 1377.69 | 0     | 1 | 65 | 6.20E-06 | 1 | RQDFIDGTAEVK                    | 5.16E+06 | control-Rep II     |
| gi 7511958 | FBgn0016724 | 689.85  | 1377.69 | 1377.69 | 0     | 1 | 69 | 1.90E-06 | 1 | RQDFIDGTAEVK                    | 5.68E+06 | control-Rep I      |
| gi 7511958 | FBgn0016724 | 689.85  | 1377.69 | 1377.69 | 0     | 1 | 54 | 5.80E-05 | 1 | RQDFIDGTAEVK                    | 5.81E+06 | parkin null-Rep I  |
| gi 7511958 | FBgn0016724 | 703.84  | 1405.66 | 1405.66 | 0     | 1 | 26 | 0.024    | 1 | RYSFNNEVSYK                     | 8.78E+05 | parkin null-Rep II |
| gi 7511958 | FBgn0016724 | 703.84  | 1405.67 | 1405.66 | 0     | 1 | 30 | 0.011    | 1 | RYSFNNEVSYK                     | 1.16E+06 | parkin null-Rep I  |
| gi 7511958 | FBgn0016724 | 871.89  | 1741.77 | 1741.77 | 0     | 0 | 93 | 1.50E-09 | 1 | SFCDNCVEQITEK                   | 2.04E+07 | control-Rep II     |
| gi 7511958 | FBgn0016724 | 871.9   | 1741.78 | 1741.77 | 0.01  | 0 | 81 | 4.00E-08 | 1 | SFCDNCVEQITEK                   | 2.21E+07 | control-Rep I      |
| gi 7511958 | FBgn0016724 | 871.89  | 1741.77 | 1741.77 | 0.01  | 0 | 71 | 2.50E-07 | 1 | SFCDNCVEQITEK                   | 2.22E+07 | parkin null-Rep II |
| gi 7511958 | FBgn0016724 | 871.89  | 1741.77 | 1741.77 | 0.01  | 0 | 76 | 8.70E-08 | 1 | SFCDNCVEQITEK                   | 2.40E+07 | parkin null-Rep I  |
| gi 7511958 | FBgn0016724 | 1068.52 | 2135.03 | 2135.01 | 0.01  | 0 | 78 | 2.50E-07 | 1 | SGLSQGNIDAQLSDTPFGSNK           | 5.71E+06 | control-Rep I      |
| gi 7511958 | FBgn0016724 | 1068.52 | 2135.03 | 2135.01 | 0.01  | 0 | 59 | 2.30E-05 | 1 | SGLSQGNIDAQLSDTPFGSNK           | 6.03E+06 | control-Rep II     |
| gi 7511958 | FBgn0016724 | 1068.53 | 2135.04 | 2135.01 | 0.03  | 0 | 68 | 1.90E-06 | 1 | SGLSQGNIDAQLSDTPFGSNK           | 6.45E+06 | parkin null-Rep II |
| gi 7511958 | FBgn0016724 | 1068.53 | 2135.04 | 2135.01 | 0.02  | 0 | 65 | 3.60E-06 | 1 | SGLSQGNIDAQLSDTPFGSNK           | 1.07E+07 | parkin null-Rep I  |
| gi 7511958 | FBgn0016724 | 890.93  | 1779.85 | 1779.84 | 0     | 0 | 80 | 1.00E-07 | 1 | SLSGNTVAALSECASGTR              | 2.34E+07 | control-Rep II     |
| gi 7511958 | FBgn0016724 | 890.92  | 1779.83 | 1779.84 | -0.01 | 0 | 83 | 4.90E-08 | 1 | SLSGNTVAALSECASGTR              | 2.77E+07 | control-Rep I      |



|             |             |        |         |         |       |   |    |          |   |                            |          |                    |
|-------------|-------------|--------|---------|---------|-------|---|----|----------|---|----------------------------|----------|--------------------|
| gij7511958  | FBgn0016724 | 890.93 | 1779.84 | 1779.84 | -0.01 | 0 | 80 | 9.80E-08 | 1 | SLSGNTVAALSECASTGR         | 2.94E+07 | parkin null-Rep I  |
| gij7511958  | FBgn0016724 | 890.93 | 1779.85 | 1779.84 | 0.01  | 0 | 76 | 2.70E-07 | 1 | SLSGNTVAALSECASTGR         | 3.10E+07 | parkin null-Rep II |
| gij7511958  | FBgn0016724 | 708.72 | 2123.14 | 2123.12 | 0.02  | 1 | 24 | 0.032    | 1 | SVDKETLNQAASQLLPNAPK       | 2.00E+07 | control-Rep II     |
| gij7511958  | FBgn0016724 | 708.72 | 2123.13 | 2123.12 | 0.01  | 1 | 24 | 0.037    | 1 | SVDKETLNQAASQLLPNAPK       | 2.31E+07 | parkin null-Rep I  |
| gij7511958  | FBgn0016724 | 708.71 | 2123.12 | 2123.12 | 0     | 1 | 39 | 0.0014   | 1 | SVDKETLNQAASQLLPNAPK       | 2.31E+07 | parkin null-Rep II |
| gij7511958  | FBgn0016724 | 813.42 | 1624.83 | 1624.82 | 0.01  | 0 | 78 | 2.40E-07 | 1 | TILSDLVDSTGDYVK            | 2.75E+07 | control-Rep II     |
| gij7511958  | FBgn0016724 | 813.42 | 1624.82 | 1624.82 | 0     | 0 | 67 | 3.20E-06 | 1 | TILSDLVDSTGDYVK            | 3.24E+07 | control-Rep I      |
| gij7511958  | FBgn0016724 | 813.42 | 1624.82 | 1624.82 | 0     | 0 | 95 | 5.10E-09 | 1 | TILSDLVDSTGDYVK            | 3.32E+07 | parkin null-Rep I  |
| gij7511958  | FBgn0016724 | 813.42 | 1624.82 | 1624.82 | 0     | 0 | 93 | 8.10E-09 | 1 | TILSDLVDSTGDYVK            | 3.71E+07 | parkin null-Rep II |
| gij7511958  | FBgn0016724 | 775.09 | 2322.24 | 2322.24 | 0     | 1 | 56 | 2.20E-05 | 1 | VQILDKNPIEITSEVQPNSAK      | 1.46E+07 | parkin null-Rep II |
| gij7511958  | FBgn0016724 | 775.09 | 2322.24 | 2322.24 | 0     | 1 | 47 | 0.00017  | 1 | VQILDKNPIEITSEVQPNSAK      | 2.05E+07 | parkin null-Rep I  |
| gij7511958  | FBgn0016724 | 842.93 | 1683.84 | 1683.85 | -0.01 | 0 | 85 | 4.00E-08 | 1 | YQFTANVQPTSSTIK            | 3.31E+06 | parkin null-Rep II |
| gij7511958  | FBgn0016724 | 842.93 | 1683.86 | 1683.85 | 0.01  | 0 | 73 | 7.60E-07 | 1 | YQFTANVQPTSSTIK            | 4.54E+06 | control-Rep II     |
| gij7511958  | FBgn0016724 | 842.93 | 1683.85 | 1683.85 | 0     | 0 | 57 | 3.10E-05 | 1 | YQFTANVQPTSSTIK            | 4.80E+06 | parkin null-Rep I  |
| gij7511958  | FBgn0016724 | 842.93 | 1683.85 | 1683.85 | 0     | 0 | 57 | 2.70E-05 | 1 | YQFTANVQPTSSTIK            | 6.33E+06 | control-Rep I      |
| gij7511958  | FBgn0016724 | 625.79 | 1249.56 | 1249.56 | 0     | 0 | 41 | 0.0005   | 1 | YSFNNEVSYK                 | 4.99E+06 | parkin null-Rep I  |
| gij7511958  | FBgn0016724 | 625.78 | 1249.55 | 1249.56 | -0.01 | 0 | 41 | 0.00041  | 1 | YSFNNEVSYK                 | 5.85E+06 | parkin null-Rep II |
| gij7511958  | FBgn0016724 | 625.79 | 1249.56 | 1249.56 | 0     | 0 | 40 | 0.00054  | 1 | YSFNNEVSYK                 | 6.15E+06 | control-Rep II     |
| gij7511958  | FBgn0016724 | 625.79 | 1249.57 | 1249.56 | 0     | 0 | 40 | 0.0006   | 1 | YSFNNEVSYK                 | 6.79E+06 | control-Rep I      |
| gij3915856  | FBgn0017545 | 803.9  | 1605.79 | 1605.79 | 0     | 0 | 31 | 0.0098   | 1 | MTDIITNEVSGADLK            | 1.71E+07 | parkin null-Rep II |
| gij3915856  | FBgn0017545 | 803.91 | 1605.81 | 1605.79 | 0.01  | 0 | 40 | 0.0014   | 1 | MTDIITNEVSGADLK            | 1.81E+07 | parkin null-Rep I  |
| gij3915856  | FBgn0017545 | 803.91 | 1605.81 | 1605.79 | 0.01  | 0 | 56 | 3.60E-05 | 1 | MTDIITNEVSGADLK            | 1.83E+07 | control-Rep II     |
| gij3915856  | FBgn0017545 | 803.9  | 1605.79 | 1605.79 | 0     | 0 | 60 | 1.20E-05 | 1 | MTDIITNEVSGADLK            | 2.23E+07 | control-Rep I      |
| gij3915856  | FBgn0017545 | 624.85 | 1247.68 | 1247.68 | 0     | 0 | 42 | 0.0012   | 1 | VFEVSLADLQK                | 9.13E+06 | parkin null-Rep II |
| gij3915856  | FBgn0017545 | 624.85 | 1247.68 | 1247.68 | 0     | 0 | 35 | 0.007    | 1 | VFEVSLADLQK                | 9.56E+06 | control-Rep II     |
| gij3915856  | FBgn0017545 | 624.84 | 1247.67 | 1247.68 | -0.01 | 0 | 42 | 0.0014   | 1 | VFEVSLADLQK                | 1.20E+07 | control-Rep I      |
| gij24646112 | FBgn0019624 | 793.9  | 1585.78 | 1585.78 | 0     | 0 | 56 | 3.50E-05 | 1 | GMNDLLGMDLVPSPK            | 7.51E+06 | parkin null-Rep I  |
| gij24646112 | FBgn0019624 | 793.9  | 1585.79 | 1585.78 | 0     | 0 | 45 | 0.00052  | 1 | GMNDLLGMDLVPSPK            | 8.46E+06 | parkin null-Rep II |
| gij24646112 | FBgn0019624 | 793.91 | 1585.8  | 1585.78 | 0.01  | 0 | 54 | 7.60E-05 | 1 | GMNDLLGMDLVPSPK            | 1.03E+07 | control-Rep II     |
| gij24646112 | FBgn0019624 | 793.9  | 1585.78 | 1585.78 | 0     | 0 | 50 | 0.00016  | 1 | GMNDLLGMDLVPSPK            | 1.21E+07 | control-Rep I      |
| gij24646112 | FBgn0019624 | 961.21 | 2880.59 | 2880.57 | 0.02  | 0 | 27 | 0.0094   | 1 | ITPTLQELGIPTIEELGYDKPELALK | 3.61E+07 | parkin null-Rep II |
| gij24646112 | FBgn0019624 | 961.21 | 2880.6  | 2880.57 | 0.03  | 0 | 34 | 0.0016   | 1 | ITPTLQELGIPTIEELGYDKPELALK | 3.67E+07 | control-Rep II     |
| gij24646112 | FBgn0019624 | 961.2  | 2880.59 | 2880.57 | 0.02  | 0 | 36 | 0.0014   | 1 | ITPTLQELGIPTIEELGYDKPELALK | 3.81E+07 | parkin null-Rep I  |
| gij24646112 | FBgn0019624 | 961.2  | 2880.59 | 2880.57 | 0.01  | 0 | 31 | 0.0052   | 1 | ITPTLQELGIPTIEELGYDKPELALK | 4.45E+07 | control-Rep I      |
| gij24646112 | FBgn0019624 | 857.95 | 1713.89 | 1713.88 | 0.01  | 1 | 83 | 7.50E-08 | 1 | KGMNDLLGMDLVPSPK           | 4.10E+06 | parkin null-Rep I  |
| gij24646112 | FBgn0019624 | 572.3  | 1713.88 | 1713.88 | 0     | 1 | 41 | 0.0023   | 1 | KGMNDLLGMDLVPSPK           | 4.47E+06 | parkin null-Rep II |
| gij24646112 | FBgn0019624 | 572.3  | 1713.88 | 1713.88 | 0     | 1 | 47 | 0.0006   | 1 | KGMNDLLGMDLVPSPK           | 5.73E+06 | control-Rep II     |
| gij24646112 | FBgn0019624 | 572.3  | 1713.88 | 1713.88 | 0     | 1 | 53 | 7.10E-05 | 1 | KGMNDLLGMDLVPSPK           | 6.24E+06 | control-Rep I      |
| gij24651129 | FBgn0020235 | 399.88 | 1196.61 | 1196.61 | 0     | 0 | 21 | 0.1      | 1 | GLCGAVHTGVAR               | 1.37E+06 | parkin null-Rep II |

|             |             |         |         |         |       |   |     |          |   |                           |          |                    |
|-------------|-------------|---------|---------|---------|-------|---|-----|----------|---|---------------------------|----------|--------------------|
| gij24651129 | FBgn0020235 | 599.31  | 1196.61 | 1196.61 | 0     | 0 | 44  | 0.00055  | 1 | GLCGAVHTGVAR              | 2.20E+06 | parkin null-Rep I  |
| gij24651129 | FBgn0020235 | 599.31  | 1196.61 | 1196.61 | 0     | 0 | 48  | 0.00059  | 1 | GLCGAVHTGVAR              | 2.39E+06 | control-Rep II     |
| gij24651129 | FBgn0020235 | 399.88  | 1196.61 | 1196.61 | 0     | 0 | 24  | 0.048    | 1 | GLCGAVHTGVAR              | 2.94E+06 | control-Rep I      |
| gij24651129 | FBgn0020235 | 900.94  | 1799.86 | 1799.86 | 0     | 0 | 51  | 7.50E-05 | 1 | IANEVLQTYDYTEGK           | 2.58E+07 | parkin null-Rep II |
| gij24651129 | FBgn0020235 | 900.94  | 1799.86 | 1799.86 | 0     | 0 | 57  | 1.90E-05 | 1 | IANEVLQTYDYTEGK           | 2.79E+07 | control-Rep II     |
| gij24651129 | FBgn0020235 | 900.94  | 1799.86 | 1799.86 | 0     | 0 | 62  | 5.50E-06 | 1 | IANEVLQTYDYTEGK           | 3.12E+07 | parkin null-Rep I  |
| gij24651129 | FBgn0020235 | 900.93  | 1799.85 | 1799.86 | -0.01 | 0 | 67  | 1.70E-06 | 1 | IANEVLQTYDYTEGK           | 3.21E+07 | control-Rep I      |
| gij24647885 | FBgn0020238 | 1044.49 | 2086.97 | 2086.96 | 0.02  | 0 | 114 | 2.90E-11 | 1 | AAFDDAIAELDTLSEESYK       | 5.60E+07 | parkin null-Rep II |
| gij24647885 | FBgn0020238 | 1044.49 | 2086.96 | 2086.96 | 0     | 0 | 107 | 1.60E-10 | 1 | AAFDDAIAELDTLSEESYK       | 6.11E+07 | control-Rep I      |
| gij24647885 | FBgn0020238 | 1044.49 | 2086.97 | 2086.96 | 0.01  | 0 | 97  | 1.60E-09 | 1 | AAFDDAIAELDTLSEESYK       | 6.55E+07 | parkin null-Rep I  |
| gij24647885 | FBgn0020238 | 1044.5  | 2086.98 | 2086.96 | 0.02  | 0 | 113 | 3.90E-11 | 1 | AAFDDAIAELDTLSEESYK       | 6.30E+07 | control-Rep II     |
| gij24647885 | FBgn0020238 | 709.87  | 1417.72 | 1417.71 | 0.01  | 0 | 52  | 0.0001   | 1 | DICSDILNVLEK              | 6.24E+07 | parkin null-Rep I  |
| gij24647885 | FBgn0020238 | 709.87  | 1417.72 | 1417.71 | 0.01  | 0 | 68  | 2.60E-06 | 1 | DICSDILNVLEK              | 6.30E+07 | control-Rep II     |
| gij24647885 | FBgn0020238 | 709.87  | 1417.72 | 1417.71 | 0.01  | 0 | 59  | 1.90E-05 | 1 | DICSDILNVLEK              | 6.79E+07 | control-Rep I      |
| gij24647885 | FBgn0020238 | 709.87  | 1417.72 | 1417.71 | 0.01  | 0 | 54  | 7.30E-05 | 1 | DICSDILNVLEK              | 7.23E+07 | parkin null-Rep II |
| gij24583992 | FBgn0020368 | 891.43  | 1780.84 | 1780.85 | 0     | 0 | 65  | 3.20E-06 | 1 | LAEMPADSGYPAYLGAR         | 1.45E+07 | control-Rep II     |
| gij24583992 | FBgn0020368 | 891.43  | 1780.85 | 1780.85 | 0     | 0 | 79  | 2.40E-07 | 1 | LAEMPADSGYPAYLGAR         | 1.54E+07 | control-Rep I      |
| gij24583992 | FBgn0020368 | 891.43  | 1780.84 | 1780.85 | 0     | 0 | 73  | 5.40E-07 | 1 | LAEMPADSGYPAYLGAR         | 1.73E+07 | parkin null-Rep I  |
| gij24583992 | FBgn0020368 | 891.44  | 1780.86 | 1780.85 | 0.01  | 0 | 60  | 1.10E-05 | 1 | LAEMPADSGYPAYLGAR         | 1.80E+07 | parkin null-Rep II |
| gij24583992 | FBgn0020368 | 761.36  | 1520.71 | 1520.71 | 0     | 0 | 50  | 0.00014  | 1 | SEMWEFNPLNVR              | 2.21E+06 | parkin null-Rep I  |
| gij24583992 | FBgn0020368 | 761.36  | 1520.71 | 1520.71 | 0     | 0 | 54  | 5.80E-05 | 1 | SEMWEFNPLNVR              | 2.43E+06 | parkin null-Rep II |
| gij24583992 | FBgn0020368 | 761.37  | 1520.73 | 1520.71 | 0.02  | 0 | 50  | 0.00018  | 1 | SEMWEFNPLNVR              | 4.10E+06 | control-Rep II     |
| gij24583992 | FBgn0020368 | 761.37  | 1520.73 | 1520.71 | 0.02  | 0 | 39  | 0.0022   | 1 | SEMWEFNPLNVR              | 4.49E+06 | control-Rep I      |
| gij24583992 | FBgn0020368 | 705.89  | 1409.77 | 1409.76 | 0.02  | 0 | 76  | 3.50E-07 | 1 | VGYYELVGEIIR              | 4.54E+06 | control-Rep II     |
| gij24583992 | FBgn0020368 | 705.89  | 1409.77 | 1409.76 | 0.01  | 0 | 56  | 2.70E-05 | 1 | VGYYELVGEIIR              | 5.71E+06 | parkin null-Rep II |
| gij24583992 | FBgn0020368 | 705.89  | 1409.77 | 1409.76 | 0.01  | 0 | 65  | 3.80E-06 | 1 | VGYYELVGEIIR              | 6.87E+06 | parkin null-Rep I  |
| gij24583992 | FBgn0020368 | 705.89  | 1409.76 | 1409.76 | 0.01  | 0 | 72  | 7.70E-07 | 1 | VGYYELVGEIIR              | 8.22E+06 | control-Rep I      |
| gij24583992 | FBgn0020368 | 1226.62 | 2451.23 | 2451.19 | 0.03  | 0 | 71  | 1.80E-06 | 1 | VLDSLFPVCVQGGTTAIPGAFGCGK | 1.22E+06 | control-Rep II     |
| gij24583992 | FBgn0020368 | 1226.6  | 2451.18 | 2451.19 | -0.01 | 0 | 68  | 1.50E-06 | 1 | VLDSLFPVCVQGGTTAIPGAFGCGK | 1.27E+06 | parkin null-Rep II |
| gij24583992 | FBgn0020368 | 1226.6  | 2451.19 | 2451.19 | -0.01 | 0 | 72  | 1.20E-06 | 1 | VLDSLFPVCVQGGTTAIPGAFGCGK | 1.58E+06 | control-Rep I      |
| gij24583992 | FBgn0020368 | 1226.62 | 2451.23 | 2451.19 | 0.03  | 0 | 68  | 3.60E-06 | 1 | VLDSLFPVCVQGGTTAIPGAFGCGK | 1.62E+06 | parkin null-Rep I  |
| gij18860083 | FBgn0020513 | 718.85  | 1435.69 | 1435.71 | -0.02 | 0 | 35  | 0.0029   | 1 | AEISNTTNGQVFR             | 1.13E+06 | parkin null-Rep I  |
| gij18860083 | FBgn0020513 | 718.86  | 1435.71 | 1435.71 | 0     | 0 | 37  | 0.0023   | 1 | AEISNTTNGQVFR             | 1.42E+06 | parkin null-Rep II |
| gij18860083 | FBgn0020513 | 718.85  | 1435.69 | 1435.71 | -0.02 | 0 | 44  | 0.00037  | 1 | AEISNTTNGQVFR             | 1.54E+06 | control-Rep I      |
| gij18860083 | FBgn0020513 | 718.86  | 1435.71 | 1435.71 | 0     | 0 | 43  | 0.00064  | 1 | AEISNTTNGQVFR             | 1.92E+06 | control-Rep II     |
| gij18860083 | FBgn0020513 | 871.98  | 1741.95 | 1741.94 | 0.01  | 0 | 44  | 0.00047  | 1 | NFIWVAEQLADIVPK           | 6.93E+06 | parkin null-Rep II |
| gij18860083 | FBgn0020513 | 871.98  | 1741.94 | 1741.94 | 0     | 0 | 23  | 0.059    | 1 | NFIWVAEQLADIVPK           | 7.47E+06 | parkin null-Rep I  |
| gij18860083 | FBgn0020513 | 871.98  | 1741.95 | 1741.94 | 0.01  | 0 | 36  | 0.0028   | 1 | NFIWVAEQLADIVPK           | 7.74E+06 | control-Rep I      |
| gij18860083 | FBgn0020513 | 871.98  | 1741.95 | 1741.94 | 0.01  | 0 | 44  | 0.00049  | 1 | NFIWVAEQLADIVPK           | 9.08E+06 | control-Rep II     |

|             |             |         |         |         |       |   |     |          |   |                                   |          |                    |
|-------------|-------------|---------|---------|---------|-------|---|-----|----------|---|-----------------------------------|----------|--------------------|
| gil10953881 | FBgn0020653 | 791.77  | 2372.29 | 2372.29 | 0     | 0 | 35  | 0.0029   | 1 | VYGLHYIGPVAGEVIQGFAAALK           | 4.64E+06 | parkin null-Rep I  |
| gil1857433  | FBgn0020653 | 791.78  | 2372.31 | 2372.29 | 0.02  | 0 | 28  | 0.011    | 1 | VYGLHYIGPVAGEVIQGFAAALK           | 5.27E+06 | parkin null-Rep II |
| gil1857433  | FBgn0020653 | 791.78  | 2372.32 | 2372.29 | 0.03  | 0 | 57  | 1.20E-05 | 1 | VYGLHYIGPVAGEVIQGFAAALK           | 5.30E+06 | control-Rep II     |
| gil10953881 | FBgn0020653 | 802.39  | 1602.77 | 1602.76 | 0     | 0 | 36  | 0.0058   | 1 | WGVGGTCVNVGCIPK                   | 1.14E+07 | control-Rep I      |
| gil10953881 | FBgn0020653 | 802.39  | 1602.77 | 1602.76 | 0.01  | 0 | 41  | 0.00094  | 1 | WGVGGTCVNVGCIPK                   | 1.18E+07 | parkin null-Rep I  |
| gil1857433  | FBgn0020653 | 802.39  | 1602.77 | 1602.76 | 0     | 0 | 52  | 0.00014  | 1 | WGVGGTCVNVGCIPK                   | 1.23E+07 | parkin null-Rep II |
| gil1857433  | FBgn0020653 | 802.4   | 1602.79 | 1602.76 | 0.02  | 0 | 56  | 6.00E-05 | 1 | WGVGGTCVNVGCIPK                   | 1.25E+07 | control-Rep II     |
| gil1857602  | FBgn0020765 | 1182.58 | 3544.72 | 3544.69 | 0.03  | 0 | 25  | 0.051    | 1 | GSVTWVAPDGQTYTINFVADENGFQPEGAHLPK | 3.12E+06 | parkin null-Rep I  |
| gil1857602  | FBgn0020765 | 1182.57 | 3544.69 | 3544.69 | 0     | 0 | 35  | 0.0045   | 1 | GSVTWVAPDGQTYTINFVADENGFQPEGAHLPK | 3.74E+06 | control-Rep II     |
| gil1857602  | FBgn0020765 | 1182.57 | 3544.69 | 3544.69 | 0     | 0 | 32  | 0.0093   | 1 | GSVTWVAPDGQTYTINFVADENGFQPEGAHLPK | 4.20E+06 | parkin null-Rep II |
| gil1857602  | FBgn0020765 | 1002.98 | 2003.94 | 2003.94 | 0     | 0 | 80  | 8.30E-08 | 1 | TEEGVVNNAGTDNESISIR               | 2.54E+08 | control-Rep I      |
| gil1857602  | FBgn0020765 | 1002.98 | 2003.94 | 2003.94 | 0     | 0 | 77  | 2.00E-07 | 1 | TEEGVVNNAGTDNESISIR               | 2.72E+08 | control-Rep II     |
| gil1857602  | FBgn0020765 | 1002.98 | 2003.94 | 2003.94 | 0     | 0 | 83  | 5.50E-08 | 1 | TEEGVVNNAGTDNESISIR               | 2.73E+08 | parkin null-Rep II |
| gil1857602  | FBgn0020765 | 1002.98 | 2003.94 | 2003.94 | 0     | 0 | 85  | 2.90E-08 | 1 | TEEGVVNNAGTDNESISIR               | 2.73E+08 | parkin null-Rep I  |
| gil3786400  | FBgn0022355 | 637.32  | 1272.63 | 1272.63 | -0.01 | 0 | 46  | 0.00061  | 1 | VSADPQISATER                      | 2.00E+05 | parkin null-Rep I  |
| gil3786400  | FBgn0022355 | 637.32  | 1272.63 | 1272.63 | -0.01 | 0 | 42  | 0.0017   | 1 | VSADPQISATER                      | 3.44E+05 | control-Rep I      |
| gil3786400  | FBgn0022355 | 637.32  | 1272.63 | 1272.63 | -0.01 | 0 | 57  | 4.90E-05 | 1 | VSADPQISATER                      | 7.21E+05 | control-Rep II     |
| gil3786400  | FBgn0022355 | 994.99  | 1987.97 | 1987.96 | 0.01  | 0 | 36  | 0.003    | 1 | VSSDDGGEVQIVPASELEK               | 4.36E+06 | parkin null-Rep I  |
| gil3786400  | FBgn0022355 | 994.99  | 1987.97 | 1987.96 | 0.01  | 0 | 38  | 0.0017   | 1 | VSSDDGGEVQIVPASELEK               | 4.94E+06 | control-Rep II     |
| gil3786400  | FBgn0022355 | 994.99  | 1987.97 | 1987.96 | 0.01  | 0 | 46  | 0.0003   | 1 | VSSDDGGEVQIVPASELEK               | 6.18E+06 | parkin null-Rep II |
| gil28573937 | FBgn0023143 | 960.43  | 2878.27 | 2878.29 | -0.01 | 1 | 83  | 9.30E-09 | 1 | IETNEAAAAASANNFDDGELDQDRVDK       | 1.53E+06 | parkin null-Rep II |
| gil2706522  | FBgn0023143 | 960.44  | 2878.3  | 2878.29 | 0.01  | 1 | 91  | 6.80E-09 | 1 | IETNEAAAAASANNFDDGELDQDRVDK       | 2.57E+06 | control-Rep II     |
| gil28573937 | FBgn0023143 | 787.4   | 1572.79 | 1572.77 | 0.01  | 0 | 77  | 5.20E-07 | 1 | VVVLTNSDGEEQQR                    | 1.07E+05 | parkin null-Rep I  |
| gil28573937 | FBgn0023143 | 787.39  | 1572.77 | 1572.77 | -0.01 | 0 | 46  | 0.00051  | 1 | VVVLTNSDGEEQQR                    | 1.13E+05 | parkin null-Rep II |
| gil2706522  | FBgn0023143 | 787.4   | 1572.79 | 1572.77 | 0.01  | 0 | 78  | 4.60E-07 | 1 | VVVLTNSDGEEQQR                    | 3.90E+05 | control-Rep II     |
| gil2706522  | FBgn0023143 | 787.4   | 1572.79 | 1572.77 | 0.01  | 0 | 68  | 4.20E-06 | 1 | VVVLTNSDGEEQQR                    | 5.05E+05 | control-Rep I      |
| gil3337433  | FBgn0024923 | 724.9   | 1447.79 | 1447.78 | 0.01  | 0 | 72  | 8.80E-07 | 1 | IVSQLLTLMDGMK                     | 4.86E+06 | parkin null-Rep I  |
| gil3337433  | FBgn0024923 | 724.9   | 1447.79 | 1447.78 | 0.01  | 0 | 78  | 1.90E-07 | 1 | IVSQLLTLMDGMK                     | 5.04E+06 | parkin null-Rep II |
| gil3337433  | FBgn0024923 | 724.9   | 1447.79 | 1447.78 | 0.01  | 0 | 70  | 1.20E-06 | 1 | IVSQLLTLMDGMK                     | 6.11E+06 | control-Rep II     |
| gil3337433  | FBgn0024923 | 724.9   | 1447.79 | 1447.78 | 0.01  | 0 | 73  | 6.30E-07 | 1 | IVSQLLTLMDGMK                     | 6.71E+06 | control-Rep I      |
| gil3337433  | FBgn0024923 | 771.93  | 1541.85 | 1541.83 | 0.01  | 0 | 39  | 0.0019   | 1 | LDQLIYIPLPDDK                     | 2.39E+06 | parkin null-Rep II |
| gil3337433  | FBgn0024923 | 771.93  | 1541.85 | 1541.83 | 0.01  | 0 | 36  | 0.0037   | 1 | LDQLIYIPLPDDK                     | 3.33E+06 | control-Rep II     |
| gil3337433  | FBgn0024923 | 771.93  | 1541.85 | 1541.83 | 0.01  | 0 | 52  | 9.20E-05 | 1 | LDQLIYIPLPDDK                     | 5.02E+06 | control-Rep I      |
| gil3337433  | FBgn0024923 | 771.93  | 1541.85 | 1541.83 | 0.01  | 0 | 48  | 0.00026  | 1 | LDQLIYIPLPDDK                     | 5.11E+06 | parkin null-Rep I  |
| gil3337433  | FBgn0024923 | 914.01  | 1826.01 | 1825.98 | 0.02  | 0 | 40  | 0.001    | 1 | NSPAIIFIDEIDAIAPK                 | 5.56E+06 | control-Rep II     |
| gil3337433  | FBgn0024923 | 914.01  | 1826.01 | 1825.98 | 0.02  | 0 | 33  | 0.0053   | 1 | NSPAIIFIDEIDAIAPK                 | 5.64E+06 | parkin null-Rep II |
| gil3337433  | FBgn0024923 | 914.01  | 1826    | 1825.98 | 0.01  | 0 | 102 | 6.40E-10 | 1 | NSPAIIFIDEIDAIAPK                 | 9.51E+06 | control-Rep I      |
| gil3337433  | FBgn0024923 | 941.97  | 1881.93 | 1881.92 | 0.01  | 0 | 92  | 7.10E-09 | 1 | SAAPCVLFFDELDSIAK                 | 5.75E+06 | parkin null-Rep II |
| gil3337433  | FBgn0024923 | 941.97  | 1881.93 | 1881.92 | 0.01  | 0 | 65  | 3.70E-06 | 1 | SAAPCVLFFDELDSIAK                 | 6.17E+06 | parkin null-Rep I  |

|             |             |         |         |         |       |   |    |          |   |                         |          |                    |
|-------------|-------------|---------|---------|---------|-------|---|----|----------|---|-------------------------|----------|--------------------|
| gij3337433  | FBgn0024923 | 941.97  | 1881.93 | 1881.92 | 0.01  | 0 | 68 | 1.70E-06 | 1 | SAAPCVLFFDELDSIAK       | 6.31E+06 | control-Rep II     |
| gij3337433  | FBgn0024923 | 941.96  | 1881.91 | 1881.92 | 0     | 0 | 56 | 3.10E-05 | 1 | SAAPCVLFFDELDSIAK       | 8.46E+06 | control-Rep I      |
| gij3337433  | FBgn0024923 | 810.42  | 1618.83 | 1618.81 | 0.02  | 0 | 66 | 3.90E-06 | 1 | VINQILTEMDGMGAK         | 1.13E+07 | parkin null-Rep II |
| gij3337433  | FBgn0024923 | 810.42  | 1618.83 | 1618.81 | 0.02  | 0 | 66 | 7.90E-06 | 1 | VINQILTEMDGMGAK         | 1.25E+07 | control-Rep II     |
| gij3337433  | FBgn0024923 | 810.42  | 1618.82 | 1618.81 | 0.01  | 0 | 57 | 3.60E-05 | 1 | VINQILTEMDGMGAK         | 1.30E+07 | parkin null-Rep I  |
| gij24583025 | FBgn0026439 | 631.83  | 1261.64 | 1261.64 | 0     | 0 | 53 | 8.50E-05 | 1 | IVETQTESIDK             | 1.30E+06 | parkin null-Rep II |
| gij24583025 | FBgn0026439 | 631.82  | 1261.63 | 1261.64 | -0.01 | 0 | 58 | 2.40E-05 | 1 | IVETQTESIDK             | 1.79E+06 | parkin null-Rep I  |
| gij24583025 | FBgn0026439 | 631.83  | 1261.65 | 1261.64 | 0.01  | 0 | 55 | 5.70E-05 | 1 | IVETQTESIDK             | 2.29E+06 | control-Rep II     |
| gij24583025 | FBgn0026439 | 631.82  | 1261.63 | 1261.64 | -0.01 | 0 | 61 | 1.30E-05 | 1 | IVETQTESIDK             | 2.52E+06 | control-Rep I      |
| gij24583025 | FBgn0026439 | 686.88  | 1371.75 | 1371.74 | 0.01  | 0 | 46 | 0.00045  | 1 | VLTPDTLMDLVR            | 2.16E+07 | parkin null-Rep II |
| gij24583025 | FBgn0026439 | 686.88  | 1371.75 | 1371.74 | 0.01  | 0 | 55 | 5.10E-05 | 1 | VLTPDTLMDLVR            | 2.45E+07 | control-Rep II     |
| gij24583025 | FBgn0026439 | 686.88  | 1371.75 | 1371.74 | 0     | 0 | 52 | 0.00011  | 1 | VLTPDTLMDLVR            | 2.73E+07 | control-Rep I      |
| gij24583025 | FBgn0026439 | 686.88  | 1371.75 | 1371.74 | 0     | 0 | 38 | 0.0025   | 1 | VLTPDTLMDLVR            | 2.80E+07 | parkin null-Rep I  |
| gij7290712  | FBgn0026708 | 796.84  | 1591.66 | 1591.65 | 0.01  | 0 | 25 | 0.0038   | 1 | MGETTIDMMYGGMR          | 9.82E+06 | parkin null-Rep I  |
| gij7290712  | FBgn0026708 | 796.84  | 1591.66 | 1591.65 | 0.01  | 0 | 55 | 1.80E-06 | 1 | MGETTIDMMYGGMR          | 1.19E+07 | parkin null-Rep II |
| gij7290712  | FBgn0026708 | 796.83  | 1591.64 | 1591.65 | -0.01 | 0 | 58 | 4.40E-07 | 1 | MGETTIDMMYGGMR          | 1.31E+07 | control-Rep II     |
| gij7290712  | FBgn0026708 | 829.39  | 1656.77 | 1656.76 | 0.01  | 0 | 60 | 5.80E-06 | 1 | MLGYDNAPFTELMR          | 1.81E+07 | parkin null-Rep II |
| gij7290712  | FBgn0026708 | 829.4   | 1656.78 | 1656.76 | 0.01  | 0 | 61 | 6.10E-06 | 1 | MLGYDNAPFTELMR          | 2.20E+07 | control-Rep I      |
| gij7290712  | FBgn0026708 | 829.4   | 1656.78 | 1656.76 | 0.01  | 0 | 55 | 2.60E-05 | 1 | MLGYDNAPFTELMR          | 2.28E+07 | parkin null-Rep I  |
| gij7290712  | FBgn0026708 | 829.39  | 1656.77 | 1656.76 | 0.01  | 0 | 55 | 2.10E-05 | 1 | MLGYDNAPFTELMR          | 2.39E+07 | control-Rep II     |
| gij24643268 | FBgn0027291 | 844.75  | 2531.23 | 2531.2  | 0.03  | 0 | 22 | 0.066    | 1 | ENTEGEYSGIEHEIVDGVVQSIK | 8.94E+06 | parkin null-Rep II |
| gij24643268 | FBgn0027291 | 844.75  | 2531.23 | 2531.2  | 0.02  | 0 | 22 | 0.065    | 1 | ENTEGEYSGIEHEIVDGVVQSIK | 8.94E+06 | parkin null-Rep I  |
| gij24643268 | FBgn0027291 | 787.91  | 1573.81 | 1573.81 | 0     | 0 | 61 | 1.40E-05 | 1 | FGIPQAAIDSVNTNK         | 3.14E+07 | parkin null-Rep I  |
| gij24643268 | FBgn0027291 | 787.91  | 1573.81 | 1573.81 | 0     | 0 | 76 | 4.20E-07 | 1 | FGIPQAAIDSVNTNK         | 3.34E+07 | parkin null-Rep II |
| gij24643268 | FBgn0027291 | 787.91  | 1573.81 | 1573.81 | 0     | 0 | 57 | 3.50E-05 | 1 | FGIPQAAIDSVNTNK         | 3.40E+07 | control-Rep I      |
| gij24643268 | FBgn0027291 | 787.91  | 1573.81 | 1573.81 | 0     | 0 | 55 | 5.40E-05 | 1 | FGIPQAAIDSVNTNK         | 3.44E+07 | control-Rep II     |
| gij24643268 | FBgn0027291 | 1114.09 | 2226.16 | 2226.17 | 0     | 0 | 61 | 9.90E-06 | 1 | IFTAANVPIEWAVDVTPVR     | 5.50E+06 | parkin null-Rep I  |
| gij24643268 | FBgn0027291 | 1114.09 | 2226.17 | 2226.17 | 0     | 0 | 79 | 1.60E-07 | 1 | IFTAANVPIEWAVDVTPVR     | 6.45E+06 | control-Rep II     |
| gij24643268 | FBgn0027291 | 704.88  | 1407.75 | 1407.72 | 0.02  | 0 | 41 | 0.0012   | 1 | TLYDDVDVVVIR            | 4.13E+06 | parkin null-Rep I  |
| gij24643268 | FBgn0027291 | 704.87  | 1407.73 | 1407.72 | 0     | 0 | 28 | 0.02     | 1 | TLYDDVDVVVIR            | 6.46E+06 | control-Rep I      |
| gij24643268 | FBgn0027291 | 933.02  | 1864.03 | 1864.03 | -0.01 | 0 | 45 | 0.00031  | 1 | VTLPDGDGIGPEISAAVQK     | 7.03E+06 | parkin null-Rep I  |
| gij24643268 | FBgn0027291 | 933.03  | 1864.05 | 1864.03 | 0.01  | 0 | 48 | 0.0001   | 1 | VTLPDGDGIGPEISAAVQK     | 9.31E+06 | parkin null-Rep II |
| gij24643268 | FBgn0027291 | 933.03  | 1864.05 | 1864.03 | 0.01  | 0 | 31 | 0.0052   | 1 | VTLPDGDGIGPEISAAVQK     | 9.47E+06 | control-Rep II     |
| gij24643268 | FBgn0027291 | 933.02  | 1864.03 | 1864.03 | -0.01 | 0 | 39 | 0.0012   | 1 | VTLPDGDGIGPEISAAVQK     | 1.13E+07 | control-Rep I      |
| gij18858089 | FBgn0028342 | 733.75  | 2198.24 | 2198.24 | 0     | 0 | 26 | 0.011    | 1 | HVPTLAVLKPQVVQVVDGK     | 3.67E+07 | parkin null-Rep I  |
| gij18858089 | FBgn0028342 | 733.76  | 2198.25 | 2198.24 | 0     | 0 | 28 | 0.0069   | 1 | HVPTLAVLKPQVVQVVDGK     | 3.77E+07 | parkin null-Rep II |
| gij18858089 | FBgn0028342 | 733.76  | 2198.25 | 2198.24 | 0     | 0 | 41 | 0.00038  | 1 | HVPTLAVLKPQVVQVVDGK     | 4.17E+07 | control-Rep II     |
| gij18858089 | FBgn0028342 | 733.75  | 2198.24 | 2198.24 | -0.01 | 0 | 28 | 0.008    | 1 | HVPTLAVLKPQVVQVVDGK     | 4.50E+07 | control-Rep I      |
| gij18858089 | FBgn0028342 | 649.8   | 1297.59 | 1297.58 | 0.01  | 0 | 41 | 0.00035  | 1 | YQSQLSSAGDDK            | 1.32E+05 | parkin null-Rep II |

|             |             |         |         |         |       |   |    |          |   |                                      |          |                    |
|-------------|-------------|---------|---------|---------|-------|---|----|----------|---|--------------------------------------|----------|--------------------|
| gil18858089 | FBgn0028342 | 649.79  | 1297.57 | 1297.58 | -0.01 | 0 | 48 | 4.20E-05 | 1 | YQSQLSSAGDDK                         | 2.41E+05 | control-Rep II     |
| gil24583079 | FBgn0028479 | 1012.23 | 3033.66 | 3033.63 | 0.03  | 0 | 54 | 1.50E-05 | 1 | LGIVDLLVDPLGPGQLPAEQNTIEYLEK         | 6.82E+06 | control-Rep II     |
| gil24583079 | FBgn0028479 | 1012.22 | 3033.65 | 3033.63 | 0.02  | 0 | 63 | 2.30E-06 | 1 | LGIVDLLVDPLGPGQLPAEQNTIEYLEK         | 7.54E+06 | control-Rep I      |
| gil24583079 | FBgn0028479 | 918.53  | 1835.05 | 1835.03 | 0.02  | 0 | 33 | 0.002    | 1 | LGLPEVMLGLLPGGGGTVR                  | 5.08E+06 | parkin null-Rep II |
| gil24583079 | FBgn0028479 | 918.53  | 1835.05 | 1835.03 | 0.01  | 0 | 26 | 0.016    | 1 | LGLPEVMLGLLPGGGGTVR                  | 6.16E+06 | control-Rep I      |
| gil24583079 | FBgn0028479 | 918.52  | 1835.03 | 1835.03 | -0.01 | 0 | 37 | 0.0017   | 1 | LGLPEVMLGLLPGGGGTVR                  | 6.87E+06 | control-Rep II     |
| gil24583079 | FBgn0028479 | 918.53  | 1835.05 | 1835.03 | 0.02  | 0 | 38 | 0.00054  | 1 | LGLPEVMLGLLPGGGGTVR                  | 8.57E+06 | parkin null-Rep I  |
| gil24583079 | FBgn0028479 | 788.42  | 1574.83 | 1574.82 | 0     | 0 | 36 | 0.0067   | 1 | LTSVPTALDMELTGK                      | 1.34E+07 | control-Rep I      |
| gil24583079 | FBgn0028479 | 788.42  | 1574.82 | 1574.82 | 0     | 0 | 33 | 0.0069   | 1 | LTSVPTALDMELTGK                      | 1.36E+07 | parkin null-Rep I  |
| gil24583079 | FBgn0028479 | 788.42  | 1574.83 | 1574.82 | 0     | 0 | 24 | 0.088    | 1 | LTSVPTALDMELTGK                      | 1.45E+07 | control-Rep II     |
| gil24583079 | FBgn0028479 | 788.42  | 1574.83 | 1574.82 | 0.01  | 0 | 38 | 0.0022   | 1 | LTSVPTALDMELTGK                      | 1.47E+07 | parkin null-Rep II |
| gil13124189 | FBgn0028737 | 568.3   | 1134.59 | 1134.59 | -0.01 | 0 | 56 | 7.60E-05 | 1 | ADLSVFDALGK                          | 3.65E+06 | control-Rep II     |
| gil13124189 | FBgn0028737 | 568.3   | 1134.59 | 1134.59 | -0.01 | 0 | 58 | 4.60E-05 | 1 | ADLSVFDALGK                          | 4.88E+06 | parkin null-Rep I  |
| gil13124189 | FBgn0028737 | 568.3   | 1134.59 | 1134.59 | -0.01 | 0 | 54 | 0.00011  | 1 | ADLSVFDALGK                          | 6.53E+06 | parkin null-Rep II |
| gil13124189 | FBgn0028737 | 565.78  | 1129.55 | 1129.55 | 0     | 0 | 43 | 0.00047  | 1 | HIASFEEAER                           | 1.46E+06 | parkin null-Rep II |
| gil13124189 | FBgn0028737 | 565.79  | 1129.56 | 1129.55 | 0     | 0 | 36 | 0.0033   | 1 | HIASFEEAER                           | 1.89E+06 | parkin null-Rep I  |
| gil13124189 | FBgn0028737 | 565.78  | 1129.55 | 1129.55 | 0     | 0 | 55 | 3.30E-05 | 1 | HIASFEEAER                           | 2.18E+06 | control-Rep II     |
| gil13124189 | FBgn0028737 | 565.78  | 1129.55 | 1129.55 | 0     | 0 | 44 | 0.00043  | 1 | HIASFEEAER                           | 2.67E+06 | control-Rep I      |
| gil6451558  | FBgn0028833 | 502.27  | 1503.79 | 1503.78 | 0     | 0 | 64 | 1.40E-05 | 1 | FQFTHLSAGDLLR                        | 8.68E+05 | parkin null-Rep II |
| gil6451558  | FBgn0028833 | 502.27  | 1503.79 | 1503.78 | 0     | 0 | 58 | 6.60E-05 | 1 | FQFTHLSAGDLLR                        | 9.63E+05 | control-Rep I      |
| gil6451558  | FBgn0028833 | 901.97  | 1801.93 | 1801.93 | 0     | 0 | 50 | 0.00017  | 1 | IVPVEVTCSLLENAMK                     | 5.75E+06 | control-Rep II     |
| gil6451558  | FBgn0028833 | 901.98  | 1801.95 | 1801.93 | 0.01  | 0 | 37 | 0.0026   | 1 | IVPVEVTCSLLENAMK                     | 6.53E+06 | parkin null-Rep II |
| gil6451558  | FBgn0028833 | 901.97  | 1801.93 | 1801.93 | 0     | 0 | 63 | 8.30E-06 | 1 | IVPVEVTCSLLENAMK                     | 7.25E+06 | control-Rep I      |
| gil6451558  | FBgn0028833 | 901.97  | 1801.93 | 1801.93 | -0.01 | 0 | 57 | 2.80E-05 | 1 | IVPVEVTCSLLENAMK                     | 8.05E+06 | parkin null-Rep I  |
| gil21355083 | FBgn0029093 | 915.46  | 2743.37 | 2743.37 | 0     | 0 | 75 | 4.00E-07 | 1 | GGCQVIADTGTSLIAAPLEEATSINQK          | 1.13E+07 | control-Rep II     |
| gil21355083 | FBgn0029093 | 915.46  | 2743.37 | 2743.37 | 0     | 0 | 71 | 9.60E-07 | 1 | GGCQVIADTGTSLIAAPLEEATSINQK          | 1.20E+07 | control-Rep I      |
| gil21355083 | FBgn0029093 | 915.47  | 2743.38 | 2743.37 | 0.01  | 0 | 66 | 2.90E-06 | 1 | GGCQVIADTGTSLIAAPLEEATSINQK          | 1.47E+07 | parkin null-Rep II |
| gil21355083 | FBgn0029093 | 1319.22 | 2636.43 | 2636.46 | -0.04 | 0 | 96 | 1.30E-09 | 1 | IGGTPIGGQYVVSCDLIPQLPVIK             | 1.74E+06 | control-Rep I      |
| gil21355083 | FBgn0029093 | 1319.24 | 2636.47 | 2636.46 | 0     | 0 | 66 | 8.50E-07 | 1 | IGGTPIGGQYVVSCDLIPQLPVIK             | 2.94E+06 | control-Rep II     |
| gil21355083 | FBgn0029093 | 1319.25 | 2636.49 | 2636.46 | 0.02  | 0 | 93 | 1.30E-09 | 1 | IGGTPIGGQYVVSCDLIPQLPVIK             | 3.99E+06 | parkin null-Rep II |
| gil21355083 | FBgn0029093 | 1319.25 | 2636.49 | 2636.46 | 0.03  | 0 | 55 | 7.40E-06 | 1 | IGGTPIGGQYVVSCDLIPQLPVIK             | 6.10E+06 | parkin null-Rep I  |
| gil21355083 | FBgn0029093 | 711.34  | 1420.67 | 1420.67 | 0     | 0 | 64 | 7.90E-06 | 1 | MDAASIGDLQLCK                        | 5.36E+06 | parkin null-Rep II |
| gil21355083 | FBgn0029093 | 711.34  | 1420.67 | 1420.67 | 0     | 0 | 45 | 0.00063  | 1 | MDAASIGDLQLCK                        | 6.37E+06 | parkin null-Rep I  |
| gil6634090  | FBgn0029155 | 1237.35 | 3709.03 | 3709    | 0.03  | 0 | 35 | 0.00075  | 1 | DINPMSDLAEIVSTIKPSVLIGASAAAGIFTPEILR | 2.27E+06 | control-Rep II     |
| gil6634090  | FBgn0029155 | 1237.34 | 3709    | 3709    | 0     | 0 | 24 | 0.012    | 1 | DINPMSDLAEIVSTIKPSVLIGASAAAGIFTPEILR | 2.48E+06 | parkin null-Rep I  |
| gil6634090  | FBgn0029155 | 864.47  | 1726.93 | 1726.91 | 0.01  | 0 | 43 | 0.00094  | 1 | ILGLGDLGACGMGIPVGK                   | 4.27E+06 | parkin null-Rep II |
| gil6634090  | FBgn0029155 | 864.46  | 1726.91 | 1726.91 | -0.01 | 0 | 36 | 0.0067   | 1 | ILGLGDLGACGMGIPVGK                   | 4.34E+06 | parkin null-Rep I  |
| gil6634090  | FBgn0029155 | 864.47  | 1726.93 | 1726.91 | 0.01  | 0 | 40 | 0.0019   | 1 | ILGLGDLGACGMGIPVGK                   | 4.66E+06 | control-Rep II     |
| gil6634090  | FBgn0029155 | 864.47  | 1726.93 | 1726.91 | 0.01  | 0 | 36 | 0.0048   | 1 | ILGLGDLGACGMGIPVGK                   | 5.78E+06 | control-Rep I      |

|             |             |         |         |         |       |   |    |          |   |                           |          |                    |
|-------------|-------------|---------|---------|---------|-------|---|----|----------|---|---------------------------|----------|--------------------|
| gil45551448 | FBgn0030362 | 846.87  | 1691.73 | 1691.73 | -0.01 | 0 | 78 | 4.00E-08 | 1 | SYDYDFETGVASNP            | 1.90E+07 | control-Rep I      |
| gil45551448 | FBgn0030362 | 846.87  | 1691.72 | 1691.73 | -0.01 | 0 | 86 | 4.40E-09 | 1 | SYDYDFETGVASNP            | 2.09E+07 | parkin null-Rep II |
| gil45551448 | FBgn0030362 | 846.88  | 1691.74 | 1691.73 | 0.01  | 0 | 88 | 4.80E-09 | 1 | SYDYDFETGVASNP            | 2.47E+07 | parkin null-Rep I  |
| gil45551448 | FBgn0030362 | 667.86  | 1333.71 | 1333.7  | 0.01  | 0 | 29 | 0.02     | 1 | TLFEVQPLMEK               | 4.96E+06 | control-Rep II     |
| gil45551448 | FBgn0030362 | 667.85  | 1333.69 | 1333.7  | 0     | 0 | 40 | 0.0017   | 1 | TLFEVQPLMEK               | 8.76E+06 | parkin null-Rep I  |
| gil45551448 | FBgn0030362 | 667.86  | 1333.71 | 1333.7  | 0.01  | 0 | 42 | 0.0011   | 1 | TLFEVQPLMEK               | 1.11E+07 | parkin null-Rep II |
| gil45551448 | FBgn0030362 | 755.7   | 2264.09 | 2264.09 | 0.01  | 0 | 32 | 0.0052   | 1 | VEPLPDSYAGLGEGPHWDVAR     | 2.67E+07 | control-Rep II     |
| gil45551448 | FBgn0030362 | 755.7   | 2264.09 | 2264.09 | 0     | 0 | 23 | 0.048    | 1 | VEPLPDSYAGLGEGPHWDVAR     | 2.96E+07 | control-Rep I      |
| gil45551448 | FBgn0030362 | 755.71  | 2264.09 | 2264.09 | 0.01  | 0 | 34 | 0.0032   | 1 | VEPLPDSYAGLGEGPHWDVAR     | 4.23E+07 | parkin null-Rep II |
| gil45551448 | FBgn0030362 | 755.7   | 2264.09 | 2264.09 | 0.01  | 0 | 30 | 0.0093   | 1 | VEPLPDSYAGLGEGPHWDVAR     | 4.95E+07 | parkin null-Rep I  |
| gil45551448 | FBgn0030362 | 801.95  | 1601.89 | 1601.88 | 0.01  | 1 | 41 | 0.0008   | 1 | VTGLNATGYPGVNLKV          | 2.91E+06 | control-Rep II     |
| gil45551448 | FBgn0030362 | 801.95  | 1601.89 | 1601.88 | 0.01  | 1 | 49 | 0.00012  | 1 | VTGLNATGYPGVNLKV          | 4.18E+06 | control-Rep I      |
| gil45551448 | FBgn0030362 | 801.95  | 1601.89 | 1601.88 | 0.01  | 1 | 44 | 0.00041  | 1 | VTGLNATGYPGVNLKV          | 8.99E+06 | parkin null-Rep I  |
| gil45551448 | FBgn0030362 | 735.9   | 1469.78 | 1469.79 | -0.01 | 0 | 43 | 0.0007   | 1 | VVIVNWDGVSPSAK            | 5.17E+06 | control-Rep I      |
| gil45551448 | FBgn0030362 | 735.9   | 1469.79 | 1469.79 | 0     | 0 | 36 | 0.0034   | 1 | VVIVNWDGVSPSAK            | 9.10E+06 | parkin null-Rep II |
| gil45551448 | FBgn0030362 | 735.91  | 1469.81 | 1469.79 | 0.02  | 0 | 30 | 0.014    | 1 | VVIVNWDGVSPSAK            | 9.27E+06 | parkin null-Rep I  |
| gil45551448 | FBgn0030362 | 587.32  | 1172.62 | 1172.62 | 0     | 0 | 27 | 0.037    | 1 | WEAGGQVSVIK               | 1.96E+07 | control-Rep II     |
| gil45551448 | FBgn0030362 | 587.32  | 1172.62 | 1172.62 | 0     | 0 | 36 | 0.0044   | 1 | WEAGGQVSVIK               | 2.59E+07 | parkin null-Rep II |
| gil45551448 | FBgn0030362 | 587.32  | 1172.62 | 1172.62 | 0     | 0 | 47 | 0.00047  | 1 | WEAGGQVSVIK               | 2.62E+07 | control-Rep I      |
| gil45551448 | FBgn0030362 | 587.32  | 1172.62 | 1172.62 | 0     | 0 | 31 | 0.016    | 1 | WEAGGQVSVIK               | 3.15E+07 | parkin null-Rep I  |
| gil19920346 | FBgn0031037 | 838.15  | 2511.42 | 2511.39 | 0.02  | 0 | 57 | 4.90E-06 | 1 | DGVLTVDAPLPALTAGETLIPIAHK | 4.32E+07 | control-Rep II     |
| gil19920346 | FBgn0031037 | 838.14  | 2511.41 | 2511.39 | 0.01  | 0 | 59 | 3.70E-06 | 1 | DGVLTVDAPLPALTAGETLIPIAHK | 4.39E+07 | control-Rep I      |
| gil19920346 | FBgn0031037 | 838.15  | 2511.42 | 2511.39 | 0.02  | 0 | 55 | 8.80E-06 | 1 | DGVLTVDAPLPALTAGETLIPIAHK | 4.41E+07 | parkin null-Rep II |
| gil19920346 | FBgn0031037 | 838.14  | 2511.4  | 2511.39 | 0.01  | 0 | 59 | 4.60E-06 | 1 | DGVLTVDAPLPALTAGETLIPIAHK | 4.52E+07 | parkin null-Rep I  |
| gil19920346 | FBgn0031037 | 1023.46 | 2044.91 | 2044.93 | -0.03 | 0 | 59 | 7.40E-06 | 1 | EANFFESTSSTTNSALPSR       | 4.51E+06 | parkin null-Rep II |
| gil19920346 | FBgn0031037 | 1023.48 | 2044.95 | 2044.93 | 0.01  | 0 | 55 | 3.50E-05 | 1 | EANFFESTSSTTNSALPSR       | 6.13E+06 | control-Rep I      |
| gil19920346 | FBgn0031037 | 812.42  | 1622.82 | 1622.82 | 0     | 0 | 44 | 0.00058  | 1 | FDVSQYAPEEIVVK            | 2.04E+07 | control-Rep II     |
| gil19920346 | FBgn0031037 | 812.42  | 1622.82 | 1622.82 | 0.01  | 0 | 41 | 0.0012   | 1 | FDVSQYAPEEIVVK            | 2.06E+07 | control-Rep I      |
| gil19920346 | FBgn0031037 | 812.42  | 1622.83 | 1622.82 | 0.01  | 0 | 33 | 0.0068   | 1 | FDVSQYAPEEIVVK            | 2.25E+07 | parkin null-Rep II |
| gil19920346 | FBgn0031037 | 812.42  | 1622.84 | 1622.82 | 0.02  | 0 | 39 | 0.002    | 1 | FDVSQYAPEEIVVK            | 2.28E+07 | parkin null-Rep I  |
| gil19920346 | FBgn0031037 | 856.93  | 1711.85 | 1711.84 | 0.01  | 0 | 76 | 4.10E-07 | 1 | LGDFSVIDTEFSNIR           | 2.05E+07 | parkin null-Rep II |
| gil19920346 | FBgn0031037 | 856.93  | 1711.85 | 1711.84 | 0.01  | 0 | 99 | 2.20E-09 | 1 | LGDFSVIDTEFSNIR           | 2.33E+07 | parkin null-Rep I  |
| gil19920346 | FBgn0031037 | 856.94  | 1711.86 | 1711.84 | 0.02  | 0 | 79 | 1.80E-07 | 1 | LGDFSVIDTEFSNIR           | 2.35E+07 | control-Rep II     |
| gil19920346 | FBgn0031037 | 856.93  | 1711.85 | 1711.84 | 0.01  | 0 | 61 | 1.50E-05 | 1 | LGDFSVIDTEFSNIR           | 2.46E+07 | control-Rep I      |
| gil19920346 | FBgn0031037 | 1125.53 | 2249.05 | 2249.04 | 0     | 0 | 22 | 0.075    | 1 | QQNYVSDISSPLIQDEGDNK      | 1.16E+07 | parkin null-Rep II |
| gil19920346 | FBgn0031037 | 1125.52 | 2249.03 | 2249.04 | -0.02 | 0 | 31 | 0.0082   | 1 | QQNYVSDISSPLIQDEGDNK      | 1.18E+07 | control-Rep I      |
| gil7297246  | FBgn0031908 | 727.02  | 2178.02 | 2178.04 | -0.01 | 0 | 30 | 0.0086   | 1 | FPNVTYAGNHGLEVEYPSGK      | 3.43E+06 | parkin null-Rep II |
| gil7297246  | FBgn0031908 | 727.02  | 2178.03 | 2178.04 | -0.01 | 0 | 33 | 0.0043   | 1 | FPNVTYAGNHGLEVEYPSGK      | 4.97E+06 | control-Rep II     |
| gil7297246  | FBgn0031908 | 827.39  | 1652.77 | 1652.78 | -0.01 | 0 | 75 | 3.80E-07 | 1 | IVYVGGDDTTDEDAIK          | 7.74E+06 | parkin null-Rep II |

|             |             |         |         |         |       |   |    |          |   |                                |          |                    |
|-------------|-------------|---------|---------|---------|-------|---|----|----------|---|--------------------------------|----------|--------------------|
| gil7297246  | FBgn0031908 | 827.4   | 1652.78 | 1652.78 | 0     | 0 | 72 | 6.00E-07 | 1 | IVYVGGDDTTDEDAIK               | 8.44E+06 | control-Rep II     |
| gil7297246  | FBgn0031908 | 827.4   | 1652.79 | 1652.78 | 0.01  | 0 | 26 | 0.04     | 1 | IVYVGGDDTTDEDAIK               | 8.83E+06 | control-Rep I      |
| gil7297246  | FBgn0031908 | 625.3   | 1248.59 | 1248.58 | 0     | 0 | 32 | 0.0098   | 1 | VVCSGAWVEDK                    | 1.54E+06 | parkin null-Rep I  |
| gil7297246  | FBgn0031908 | 625.3   | 1248.59 | 1248.58 | 0     | 0 | 33 | 0.0095   | 1 | VVCSGAWVEDK                    | 1.82E+06 | parkin null-Rep II |
| gil7297246  | FBgn0031908 | 625.29  | 1248.58 | 1248.58 | -0.01 | 0 | 26 | 0.019    | 1 | VVCSGAWVEDK                    | 2.71E+06 | control-Rep I      |
| gil20129399 | FBgn0032114 | 714.9   | 1427.79 | 1427.78 | 0.01  | 0 | 34 | 0.0054   | 1 | EEIFGPVQQLIR                   | 8.21E+06 | control-Rep II     |
| gil20129399 | FBgn0032114 | 714.9   | 1427.79 | 1427.78 | 0.01  | 0 | 36 | 0.0033   | 1 | EEIFGPVQQLIR                   | 1.13E+07 | parkin null-Rep II |
| gil20129399 | FBgn0032114 | 714.9   | 1427.79 | 1427.78 | 0.01  | 0 | 36 | 0.0031   | 1 | EEIFGPVQQLIR                   | 1.14E+07 | control-Rep I      |
| gil20129399 | FBgn0032114 | 714.9   | 1427.79 | 1427.78 | 0.01  | 0 | 43 | 0.0006   | 1 | EEIFGPVQQLIR                   | 1.23E+07 | parkin null-Rep I  |
| gil20129399 | FBgn0032114 | 541.28  | 1080.55 | 1080.55 | 0     | 0 | 43 | 0.0016   | 1 | VAFTGSTDVVGK                   | 1.90E+06 | control-Rep II     |
| gil20129399 | FBgn0032114 | 541.28  | 1080.55 | 1080.55 | 0     | 0 | 59 | 4.00E-05 | 1 | VAFTGSTDVVGK                   | 1.98E+06 | parkin null-Rep I  |
| gil20129399 | FBgn0032114 | 541.28  | 1080.55 | 1080.55 | 0     | 0 | 54 | 0.00011  | 1 | VAFTGSTDVVGK                   | 2.51E+06 | control-Rep I      |
| gil24583531 | FBgn0032299 | 1046.9  | 3137.67 | 3137.64 | 0.03  | 0 | 69 | 8.30E-07 | 1 | INLFEILGDQVPSEVINLQSQVDQIGR    | 8.47E+06 | control-Rep I      |
| gil24583531 | FBgn0032299 | 1046.9  | 3137.67 | 3137.64 | 0.04  | 0 | 71 | 4.70E-07 | 1 | INLFEILGDQVPSEVINLQSQVDQIGR    | 8.82E+06 | control-Rep II     |
| gil24583531 | FBgn0032299 | 1046.9  | 3137.67 | 3137.64 | 0.04  | 0 | 81 | 5.40E-08 | 1 | INLFEILGDQVPSEVINLQSQVDQIGR    | 9.74E+06 | parkin null-Rep I  |
| gil24583531 | FBgn0032299 | 1046.9  | 3137.68 | 3137.64 | 0.04  | 0 | 91 | 4.40E-09 | 1 | INLFEILGDQVPSEVINLQSQVDQIGR    | 1.04E+07 | parkin null-Rep II |
| gil24583531 | FBgn0032299 | 1084.9  | 3251.68 | 3251.68 | 0     | 1 | 68 | 3.00E-06 | 1 | INLFEILGDQVPSEVINLQSQVDQIGRN   | 4.70E+06 | control-Rep I      |
| gil24583531 | FBgn0032299 | 1084.91 | 3251.71 | 3251.68 | 0.03  | 1 | 71 | 1.30E-06 | 1 | INLFEILGDQVPSEVINLQSQVDQIGRN   | 5.16E+06 | parkin null-Rep I  |
| gil19921140 | FBgn0032350 | 850.94  | 1699.87 | 1699.86 | 0     | 0 | 68 | 2.30E-06 | 1 | GGIIDEQAVLDGLESGK              | 4.09E+06 | control-Rep II     |
| gil19921140 | FBgn0032350 | 850.94  | 1699.87 | 1699.86 | 0     | 0 | 44 | 0.0005   | 1 | GGIIDEQAVLDGLESGK              | 4.90E+06 | parkin null-Rep II |
| gil19921140 | FBgn0032350 | 850.94  | 1699.87 | 1699.86 | 0     | 0 | 58 | 1.90E-05 | 1 | GGIIDEQAVLDGLESGK              | 5.05E+06 | parkin null-Rep I  |
| gil19921140 | FBgn0032350 | 850.94  | 1699.87 | 1699.86 | 0     | 0 | 70 | 1.40E-06 | 1 | GGIIDEQAVLDGLESGK              | 5.49E+06 | control-Rep I      |
| gil19921140 | FBgn0032350 | 927.5   | 2779.48 | 2779.46 | 0.02  | 0 | 32 | 0.0063   | 1 | MTLEEIWPLADYITVHTPLIPATR       | 1.89E+06 | parkin null-Rep II |
| gil19921140 | FBgn0032350 | 927.5   | 2779.46 | 2779.46 | 0     | 0 | 43 | 0.00064  | 1 | MTLEEIWPLADYITVHTPLIPATR       | 5.86E+06 | control-Rep I      |
| gil28573391 | FBgn0033728 | 1129.54 | 3385.6  | 3385.58 | 0.01  | 0 | 51 | 0.00011  | 1 | AEEPIAHSQESNIEPDGSYNYAYETANGIK | 3.49E+06 | parkin null-Rep I  |
| gil28573391 | FBgn0033728 | 1129.55 | 3385.63 | 3385.58 | 0.04  | 0 | 30 | 0.02     | 1 | AEEPIAHSQESNIEPDGSYNYAYETANGIK | 3.51E+06 | control-Rep II     |
| gil28573391 | FBgn0033728 | 1129.55 | 3385.63 | 3385.58 | 0.04  | 0 | 46 | 0.00051  | 1 | AEEPIAHSQESNIEPDGSYNYAYETANGIK | 4.21E+06 | parkin null-Rep II |
| gil28573391 | FBgn0033728 | 650.88  | 1299.75 | 1299.74 | 0.01  | 0 | 60 | 9.90E-06 | 1 | ALDYLLSLPPAK                   | 8.79E+07 | control-Rep II     |
| gil28573391 | FBgn0033728 | 650.88  | 1299.75 | 1299.74 | 0     | 0 | 46 | 0.00028  | 1 | ALDYLLSLPPAK                   | 9.03E+07 | parkin null-Rep II |
| gil28573391 | FBgn0033728 | 650.88  | 1299.75 | 1299.74 | 0     | 0 | 54 | 4.70E-05 | 1 | ALDYLLSLPPAK                   | 1.07E+08 | control-Rep I      |
| gil28573391 | FBgn0033728 | 650.88  | 1299.75 | 1299.74 | 0.01  | 0 | 62 | 6.10E-06 | 1 | ALDYLLSLPPAK                   | 1.13E+08 | parkin null-Rep I  |
| gil28573391 | FBgn0033728 | 666.34  | 1330.67 | 1330.67 | 0     | 0 | 54 | 6.60E-05 | 1 | ATSPDSSDVIIAR                  | 1.06E+07 | parkin null-Rep II |
| gil28573391 | FBgn0033728 | 666.34  | 1330.66 | 1330.67 | -0.01 | 0 | 51 | 0.00012  | 1 | ATSPDSSDVIIAR                  | 1.14E+07 | control-Rep II     |
| gil28573391 | FBgn0033728 | 666.34  | 1330.67 | 1330.67 | 0     | 0 | 60 | 1.40E-05 | 1 | ATSPDSSDVIIAR                  | 1.15E+07 | parkin null-Rep I  |
| gil28573391 | FBgn0033728 | 666.35  | 1330.68 | 1330.67 | 0     | 0 | 46 | 0.00043  | 1 | ATSPDSSDVIIAR                  | 1.32E+07 | control-Rep I      |
| gil28573391 | FBgn0033728 | 487.26  | 1458.76 | 1458.77 | -0.01 | 1 | 22 | 0.19     | 1 | KATSPDSSDVIIAR                 | 1.14E+05 | parkin null-Rep II |
| gil28573391 | FBgn0033728 | 487.26  | 1458.76 | 1458.77 | -0.01 | 1 | 21 | 0.29     | 1 | KATSPDSSDVIIAR                 | 2.19E+05 | control-Rep II     |
| gil24653025 | FBgn0033730 | 1195.01 | 2388.01 | 2388.02 | -0.01 | 0 | 94 | 3.50E-10 | 1 | QDNVNNADGSFNSSYETSNGIR         | 1.32E+06 | control-Rep II     |
| gil24653025 | FBgn0033730 | 1195.02 | 2388.03 | 2388.02 | 0     | 0 | 87 | 3.40E-09 | 1 | QDNVNNADGSFNSSYETSNGIR         | 2.61E+06 | parkin null-Rep II |

|             |             |         |         |         |       |   |    |          |   |                                   |          |                    |
|-------------|-------------|---------|---------|---------|-------|---|----|----------|---|-----------------------------------|----------|--------------------|
| gij24653025 | FBgn0033730 | 1092.01 | 2182    | 2182    | 0     | 0 | 54 | 3.00E-05 | 1 | YVADENGFQPEGDHLVPAPQ              | 1.81E+07 | parkin null-Rep II |
| gij24653025 | FBgn0033730 | 1092    | 2181.99 | 2182    | -0.01 | 0 | 38 | 0.0009   | 1 | YVADENGFQPEGDHLVPAPQ              | 1.89E+07 | control-Rep II     |
| gij24653025 | FBgn0033730 | 1092    | 2181.99 | 2182    | -0.01 | 0 | 52 | 3.50E-05 | 1 | YVADENGFQPEGDHLVPAPQ              | 1.93E+07 | control-Rep I      |
| gij24653025 | FBgn0033730 | 1092.01 | 2182    | 2182    | 0     | 0 | 41 | 0.0005   | 1 | YVADENGFQPEGDHLVPAPQ              | 2.10E+07 | parkin null-Rep I  |
| gij25012440 | FBgn0034603 | 695.34  | 2083.01 | 2083.01 | 0     | 0 | 24 | 0.051    | 1 | IEGGTEYHYTTVTSEGIVK               | 9.74E+06 | control-Rep II     |
| gij25012440 | FBgn0034603 | 695.34  | 2083    | 2083.01 | -0.01 | 0 | 35 | 0.0056   | 1 | IEGGTEYHYTTVTSEGIVK               | 1.03E+07 | parkin null-Rep I  |
| gij25012440 | FBgn0034603 | 695.34  | 2083.01 | 2083.01 | 0     | 0 | 35 | 0.0035   | 1 | IEGGTEYHYTTVTSEGIVK               | 1.06E+07 | parkin null-Rep II |
| gij25012440 | FBgn0034603 | 899.97  | 1797.93 | 1797.94 | 0     | 0 | 50 | 0.00013  | 1 | IVPSENPGDVTTVETIK                 | 1.02E+07 | parkin null-Rep I  |
| gij25012440 | FBgn0034603 | 899.97  | 1797.93 | 1797.94 | -0.01 | 0 | 63 | 7.90E-06 | 1 | IVPSENPGDVTTVETIK                 | 1.04E+07 | control-Rep II     |
| gij25012440 | FBgn0034603 | 899.98  | 1797.95 | 1797.94 | 0.01  | 0 | 46 | 0.00034  | 1 | IVPSENPGDVTTVETIK                 | 1.07E+07 | control-Rep I      |
| gij25012440 | FBgn0034603 | 899.98  | 1797.94 | 1797.94 | 0.01  | 0 | 68 | 2.10E-06 | 1 | IVPSENPGDVTTVETIK                 | 1.15E+07 | parkin null-Rep II |
| gij25012440 | FBgn0034603 | 653     | 1955.96 | 1955.96 | 0.01  | 1 | 52 | 8.10E-05 | 1 | RVPGGVEYTYSTQLDSGK                | 4.63E+06 | control-Rep II     |
| gij25012440 | FBgn0034603 | 652.99  | 1955.95 | 1955.96 | -0.01 | 1 | 60 | 1.30E-05 | 1 | RVPGGVEYTYSTQLDSGK                | 5.70E+06 | parkin null-Rep II |
| gij25012440 | FBgn0034603 | 652.99  | 1955.95 | 1955.96 | -0.01 | 1 | 48 | 0.0002   | 1 | RVPGGVEYTYSTQLDSGK                | 6.10E+06 | parkin null-Rep I  |
| gij25012440 | FBgn0034603 | 652.99  | 1955.96 | 1955.96 | 0     | 1 | 51 | 9.30E-05 | 1 | RVPGGVEYTYSTQLDSGK                | 8.96E+06 | control-Rep I      |
| gij24762535 | FBgn0034968 | 716.85  | 1431.69 | 1431.7  | -0.02 | 0 | 65 | 3.90E-06 | 1 | CVGGVEGATSSLAPK                   | 2.41E+06 | parkin null-Rep I  |
| gij24762535 | FBgn0034968 | 716.86  | 1431.7  | 1431.7  | 0     | 0 | 75 | 4.50E-07 | 1 | CVGGVEGATSSLAPK                   | 5.01E+06 | control-Rep II     |
| gij24762535 | FBgn0034968 | 716.86  | 1431.71 | 1431.7  | 0     | 0 | 64 | 5.80E-06 | 1 | CVGGVEGATSSLAPK                   | 5.72E+06 | control-Rep I      |
| gij24762535 | FBgn0034968 | 810.9   | 1619.79 | 1619.78 | 0.01  | 0 | 62 | 7.30E-06 | 1 | EVLGTAQSVGCTVDGK                  | 3.71E+06 | parkin null-Rep I  |
| gij24762535 | FBgn0034968 | 810.9   | 1619.78 | 1619.78 | 0     | 0 | 68 | 2.00E-06 | 1 | EVLGTAQSVGCTVDGK                  | 3.97E+06 | parkin null-Rep II |
| gij24762535 | FBgn0034968 | 810.9   | 1619.79 | 1619.78 | 0     | 0 | 78 | 2.00E-07 | 1 | EVLGTAQSVGCTVDGK                  | 4.52E+06 | control-Rep II     |
| gij21355923 | FBgn0035510 | 629.66  | 1885.97 | 1885.97 | 0     | 0 | 33 | 0.006    | 1 | IVEYTADPVHGFNAVVR                 | 5.67E+06 | control-Rep II     |
| gij21355923 | FBgn0035510 | 629.66  | 1885.97 | 1885.97 | 0     | 0 | 21 | 0.099    | 1 | IVEYTADPVHGFNAVVR                 | 1.23E+07 | control-Rep I      |
| gij21355923 | FBgn0035510 | 626.36  | 1250.71 | 1250.7  | 0     | 0 | 23 | 0.071    | 1 | LALPALSPLGYH                      | 7.46E+06 | control-Rep I      |
| gij21355923 | FBgn0035510 | 626.36  | 1250.71 | 1250.7  | 0     | 0 | 35 | 0.0045   | 1 | LALPALSPLGYH                      | 2.17E+07 | parkin null-Rep II |
| gij21355923 | FBgn0035510 | 626.36  | 1250.71 | 1250.7  | 0     | 0 | 24 | 0.057    | 1 | LALPALSPLGYH                      | 2.34E+07 | parkin null-Rep I  |
| gij21355923 | FBgn0035510 | 1068.25 | 3201.72 | 3201.7  | 0.02  | 0 | 52 | 3.20E-05 | 1 | VPAYGPALAPAYPALAHGYGPALAPAYGPALPK | 1.85E+07 | parkin null-Rep I  |
| gij21355923 | FBgn0035510 | 1068.25 | 3201.73 | 3201.7  | 0.03  | 0 | 57 | 1.10E-05 | 1 | VPAYGPALAPAYPALAHGYGPALAPAYGPALPK | 2.57E+07 | control-Rep II     |
| gij21355923 | FBgn0035510 | 1068.25 | 3201.73 | 3201.7  | 0.03  | 0 | 51 | 4.30E-05 | 1 | VPAYGPALAPAYPALAHGYGPALAPAYGPALPK | 2.91E+07 | control-Rep I      |
| gij24661247 | FBgn0035943 | 633.32  | 1264.63 | 1264.63 | 0     | 0 | 64 | 1.10E-05 | 1 | DVASEALNTFAK                      | 4.28E+06 | control-Rep II     |
| gij24661247 | FBgn0035943 | 633.32  | 1264.63 | 1264.63 | 0     | 0 | 70 | 2.60E-06 | 1 | DVASEALNTFAK                      | 4.83E+06 | parkin null-Rep II |
| gij24661247 | FBgn0035943 | 548.93  | 1643.78 | 1643.78 | 0     | 0 | 43 | 0.00053  | 1 | NHFSTVHGAVEAGYR                   | 5.14E+06 | parkin null-Rep II |
| gij24661247 | FBgn0035943 | 548.94  | 1643.78 | 1643.78 | 0     | 0 | 48 | 0.00019  | 1 | NHFSTVHGAVEAGYR                   | 6.37E+06 | control-Rep II     |
| gij24661247 | FBgn0035943 | 548.93  | 1643.78 | 1643.78 | 0     | 0 | 45 | 0.0003   | 1 | NHFSTVHGAVEAGYR                   | 7.51E+06 | parkin null-Rep I  |
| gij24661247 | FBgn0035943 | 548.93  | 1643.78 | 1643.78 | 0     | 0 | 51 | 7.70E-05 | 1 | NHFSTVHGAVEAGYR                   | 7.53E+06 | control-Rep I      |
| gij24661247 | FBgn0035943 | 842.75  | 2525.22 | 2525.23 | -0.01 | 0 | 25 | 0.033    | 1 | SMPSPGPHPVVGSFGTHLQTFWR           | 2.49E+06 | parkin null-Rep I  |
| gij24661247 | FBgn0035943 | 842.75  | 2525.23 | 2525.23 | 0     | 0 | 34 | 0.0048   | 1 | SMPSPGPHPVVGSFGTHLQTFWR           | 2.81E+06 | parkin null-Rep II |
| gij21357213 | FBgn0036619 | 827.43  | 1652.84 | 1652.84 | 0     | 0 | 91 | 9.30E-09 | 1 | APLPVTDTEEVQQR                    | 1.80E+07 | parkin null-Rep II |
| gij21357213 | FBgn0036619 | 827.43  | 1652.84 | 1652.84 | 0     | 0 | 80 | 1.20E-07 | 1 | APLPVTDTEEVQQR                    | 1.80E+07 | parkin null-Rep I  |



|             |             |        |         |         |       |   |     |          |   |                         |          |                    |
|-------------|-------------|--------|---------|---------|-------|---|-----|----------|---|-------------------------|----------|--------------------|
| gij21357213 | FBgn0036619 | 827.43 | 1652.84 | 1652.84 | 0     | 0 | 96  | 2.80E-09 | 1 | APLPVTDTEEVQQR          | 2.10E+07 | control-Rep II     |
| gij21357213 | FBgn0036619 | 827.43 | 1652.84 | 1652.84 | 0     | 0 | 102 | 8.60E-10 | 1 | APLPVTDTEEVQQR          | 2.25E+07 | control-Rep I      |
| gij21357213 | FBgn0036619 | 611.28 | 1220.54 | 1220.53 | 0     | 0 | 47  | 8.40E-05 | 1 | GFYSYVDADGK             | 1.83E+07 | parkin null-Rep II |
| gij21357213 | FBgn0036619 | 611.28 | 1220.54 | 1220.53 | 0     | 0 | 65  | 1.10E-06 | 1 | GFYSYVDADGK             | 2.12E+07 | parkin null-Rep I  |
| gij21357213 | FBgn0036619 | 611.28 | 1220.54 | 1220.53 | 0.01  | 0 | 56  | 1.00E-05 | 1 | GFYSYVDADGK             | 2.28E+07 | control-Rep I      |
| gij21357213 | FBgn0036619 | 611.27 | 1220.54 | 1220.53 | 0     | 0 | 62  | 2.60E-06 | 1 | GFYSYVDADGK             | 2.49E+07 | control-Rep II     |
| gij21357213 | FBgn0036619 | 556.77 | 1111.53 | 1111.53 | 0     | 0 | 25  | 0.054    | 1 | YEANGVQGFK              | 2.48E+06 | parkin null-Rep II |
| gij21357213 | FBgn0036619 | 556.77 | 1111.53 | 1111.53 | 0     | 0 | 33  | 0.0086   | 1 | YEANGVQGFK              | 2.85E+06 | parkin null-Rep I  |
| gij21357213 | FBgn0036619 | 556.77 | 1111.53 | 1111.53 | 0     | 0 | 41  | 0.0014   | 1 | YEANGVQGFK              | 3.65E+06 | control-Rep II     |
| gij21357213 | FBgn0036619 | 556.77 | 1111.52 | 1111.53 | 0     | 0 | 39  | 0.0023   | 1 | YEANGVQGFK              | 3.96E+06 | control-Rep I      |
| gij24665395 | FBgn0036642 | 484.26 | 1449.77 | 1449.77 | 0     | 0 | 30  | 0.013    | 1 | AVVAVAGQGAAASNHK        | 1.02E+06 | parkin null-Rep II |
| gij24665395 | FBgn0036642 | 484.26 | 1449.77 | 1449.77 | 0     | 0 | 27  | 0.028    | 1 | AVVAVAGQGAAASNHK        | 1.17E+06 | parkin null-Rep I  |
| gij24665395 | FBgn0036642 | 484.26 | 1449.77 | 1449.77 | 0     | 0 | 28  | 0.021    | 1 | AVVAVAGQGAAASNHK        | 1.31E+06 | control-Rep II     |
| gij24665395 | FBgn0036642 | 484.26 | 1449.77 | 1449.77 | 0     | 0 | 28  | 0.019    | 1 | AVVAVAGQGAAASNHK        | 1.65E+06 | control-Rep I      |
| gij24665395 | FBgn0036642 | 772.94 | 1543.87 | 1543.86 | 0.01  | 0 | 54  | 3.60E-05 | 1 | EALAFaILEQALGAK         | 2.95E+06 | parkin null-Rep II |
| gij24665395 | FBgn0036642 | 772.94 | 1543.87 | 1543.86 | 0.01  | 0 | 67  | 1.60E-06 | 1 | EALAFaILEQALGAK         | 4.41E+06 | parkin null-Rep I  |
| gij24665395 | FBgn0036642 | 772.94 | 1543.86 | 1543.86 | 0     | 0 | 70  | 1.10E-06 | 1 | EALAFaILEQALGAK         | 4.89E+06 | control-Rep II     |
| gij24665395 | FBgn0036642 | 772.95 | 1543.88 | 1543.86 | 0.02  | 0 | 71  | 5.10E-07 | 1 | EALAFaILEQALGAK         | 7.19E+06 | control-Rep I      |
| gij24665395 | FBgn0036642 | 926.51 | 1851.01 | 1850.99 | 0.02  | 0 | 25  | 0.034    | 1 | LAVGAIGHLANVPYASDLA     | 4.68E+06 | control-Rep II     |
| gij24665395 | FBgn0036642 | 926.51 | 1851.01 | 1850.99 | 0.02  | 0 | 33  | 0.0081   | 1 | LAVGAIGHLANVPYASDLA     | 5.45E+06 | parkin null-Rep II |
| gij24665395 | FBgn0036642 | 926.51 | 1851    | 1850.99 | 0.01  | 0 | 22  | 0.073    | 1 | LAVGAIGHLANVPYASDLA     | 6.54E+06 | parkin null-Rep I  |
| gij24665395 | FBgn0036642 | 706.91 | 1411.81 | 1411.8  | 0     | 0 | 47  | 0.00019  | 1 | LVVATADATLPVSR          | 2.43E+07 | parkin null-Rep II |
| gij24665395 | FBgn0036642 | 706.91 | 1411.81 | 1411.8  | 0     | 0 | 27  | 0.02     | 1 | LVVATADATLPVSR          | 2.45E+07 | parkin null-Rep I  |
| gij24665395 | FBgn0036642 | 706.91 | 1411.81 | 1411.8  | 0     | 0 | 45  | 0.00033  | 1 | LVVATADATLPVSR          | 2.47E+07 | control-Rep II     |
| gij24665395 | FBgn0036642 | 706.91 | 1411.8  | 1411.8  | 0     | 0 | 62  | 7.10E-06 | 1 | LVVATADATLPVSR          | 3.04E+07 | control-Rep I      |
| gij24665395 | FBgn0036642 | 823.42 | 1644.83 | 1644.82 | 0.01  | 0 | 85  | 5.10E-08 | 1 | NIQQVGGTLTTWGDR         | 1.37E+07 | parkin null-Rep II |
| gij24665395 | FBgn0036642 | 823.42 | 1644.82 | 1644.82 | -0.01 | 0 | 86  | 3.80E-08 | 1 | NIQQVGGTLTTWGDR         | 1.60E+07 | control-Rep I      |
| gij24665395 | FBgn0036642 | 823.42 | 1644.82 | 1644.82 | 0     | 0 | 87  | 3.50E-08 | 1 | NIQQVGGTLTTWGDR         | 1.68E+07 | control-Rep II     |
| gij24665395 | FBgn0036642 | 847.45 | 2539.32 | 2539.31 | 0.01  | 0 | 98  | 1.70E-09 | 1 | NVLEADALLGAIDGISQSQVQEA | 7.73E+06 | control-Rep II     |
| gij24665395 | FBgn0036642 | 847.46 | 2539.34 | 2539.31 | 0.03  | 0 | 79  | 1.00E-07 | 1 | NVLEADALLGAIDGISQSQVQEA | 8.96E+06 | parkin null-Rep II |
| gij24665395 | FBgn0036642 | 847.46 | 2539.34 | 2539.31 | 0.03  | 0 | 71  | 6.40E-07 | 1 | NVLEADALLGAIDGISQSQVQEA | 9.37E+06 | control-Rep I      |
| gij24665395 | FBgn0036642 | 479.79 | 957.57  | 957.56  | 0     | 0 | 93  | 7.00E-09 | 1 | VSLVLGAGSR              | 2.85E+05 | parkin null-Rep I  |
| gij24665395 | FBgn0036642 | 479.79 | 957.57  | 957.56  | 0     | 0 | 71  | 1.20E-06 | 1 | VSLVLGAGSR              | 1.06E+06 | control-Rep I      |
| gij21358499 | FBgn0036762 | 724.88 | 1447.75 | 1447.75 | 0     | 0 | 29  | 0.021    | 1 | EANVAAAFGKPINF          | 1.81E+06 | control-Rep II     |
| gij21358499 | FBgn0036762 | 724.88 | 1447.75 | 1447.75 | 0     | 0 | 28  | 0.027    | 1 | EANVAAAFGKPINF          | 3.22E+06 | control-Rep I      |
| gij21358499 | FBgn0036762 | 888.94 | 1775.86 | 1775.85 | 0.01  | 0 | 35  | 0.0046   | 1 | EATLGGTCLNVGCIPSK       | 8.00E+06 | parkin null-Rep I  |
| gij21358499 | FBgn0036762 | 888.94 | 1775.87 | 1775.85 | 0.01  | 0 | 51  | 0.0001   | 1 | EATLGGTCLNVGCIPSK       | 9.52E+06 | parkin null-Rep II |
| gij21358499 | FBgn0036762 | 888.93 | 1775.86 | 1775.85 | 0     | 0 | 47  | 0.00024  | 1 | EATLGGTCLNVGCIPSK       | 1.10E+07 | control-Rep II     |
| gij21358499 | FBgn0036762 | 888.94 | 1775.87 | 1775.85 | 0.01  | 0 | 42  | 0.00088  | 1 | EATLGGTCLNVGCIPSK       | 1.25E+07 | control-Rep I      |

|             |             |         |         |         |       |   |    |          |   |                                   |          |                    |
|-------------|-------------|---------|---------|---------|-------|---|----|----------|---|-----------------------------------|----------|--------------------|
| gij21358499 | FBgn0036762 | 1107.91 | 3320.72 | 3320.71 | 0.01  | 0 | 62 | 5.70E-06 | 1 | ILGTHIIGPGAGELINEAVLAMEYGAAAEDVAR | 7.74E+06 | parkin null-Rep II |
| gij21358499 | FBgn0036762 | 1107.91 | 3320.72 | 3320.71 | 0.02  | 0 | 75 | 3.00E-07 | 1 | ILGTHIIGPGAGELINEAVLAMEYGAAAEDVAR | 1.19E+07 | control-Rep I      |
| gij21358499 | FBgn0036762 | 660.32  | 1318.63 | 1318.64 | -0.01 | 0 | 56 | 5.30E-05 | 1 | SGDNVTVSVENAK                     | 1.56E+06 | parkin null-Rep II |
| gij21358499 | FBgn0036762 | 660.33  | 1318.64 | 1318.64 | 0     | 0 | 59 | 1.70E-05 | 1 | SGDNVTVSVENAK                     | 2.29E+06 | parkin null-Rep I  |
| gij21358499 | FBgn0036762 | 660.33  | 1318.64 | 1318.64 | 0     | 0 | 49 | 0.00019  | 1 | SGDNVTVSVENAK                     | 2.99E+06 | control-Rep II     |
| gij21358499 | FBgn0036762 | 660.33  | 1318.64 | 1318.64 | 0     | 0 | 60 | 1.60E-05 | 1 | SGDNVTVSVENAK                     | 3.42E+06 | control-Rep I      |
| gij21358499 | FBgn0036762 | 1023.04 | 2044.07 | 2044.08 | -0.02 | 0 | 34 | 0.0055   | 1 | VTQLTGFGTIVNPNEVEVK               | 6.83E+06 | control-Rep I      |
| gij21358499 | FBgn0036762 | 1023.05 | 2044.09 | 2044.08 | 0     | 0 | 54 | 5.70E-05 | 1 | VTQLTGFGTIVNPNEVEVK               | 6.91E+06 | parkin null-Rep II |
| gij21358499 | FBgn0036762 | 1023.06 | 2044.11 | 2044.08 | 0.02  | 0 | 52 | 7.60E-05 | 1 | VTQLTGFGTIVNPNEVEVK               | 7.06E+06 | control-Rep II     |
| gij21358499 | FBgn0036762 | 1023.05 | 2044.09 | 2044.08 | 0     | 0 | 36 | 0.003    | 1 | VTQLTGFGTIVNPNEVEVK               | 7.51E+06 | parkin null-Rep I  |
| gij20151469 | FBgn0037138 | 795.43  | 1588.85 | 1588.85 | 0     | 0 | 30 | 0.024    | 1 | DFPIANEPILGYLK                    | 1.47E+06 | parkin null-Rep I  |
| gij20151469 | FBgn0037138 | 795.43  | 1588.85 | 1588.85 | 0     | 0 | 39 | 0.003    | 1 | DFPIANEPILGYLK                    | 3.62E+06 | parkin null-Rep II |
| gij20151469 | FBgn0037138 | 795.44  | 1588.87 | 1588.85 | 0.02  | 0 | 39 | 0.003    | 1 | DFPIANEPILGYLK                    | 3.99E+06 | control-Rep I      |
| gij20151469 | FBgn0037138 | 669.38  | 1336.74 | 1336.74 | 0     | 0 | 48 | 0.00017  | 1 | GYFVNPTIVLSK                      | 9.19E+06 | parkin null-Rep II |
| gij20151469 | FBgn0037138 | 669.38  | 1336.75 | 1336.74 | 0.01  | 0 | 50 | 0.00019  | 1 | GYFVNPTIVLSK                      | 9.80E+06 | control-Rep II     |
| gij20151469 | FBgn0037138 | 669.38  | 1336.74 | 1336.74 | 0     | 0 | 44 | 0.00041  | 1 | GYFVNPTIVLSK                      | 1.09E+07 | control-Rep I      |
| gij20151469 | FBgn0037138 | 611.02  | 1830.04 | 1830.03 | 0.01  | 1 | 49 | 7.00E-05 | 1 | LKDFPIANEPILGYLK                  | 6.29E+06 | parkin null-Rep II |
| gij20151469 | FBgn0037138 | 611.02  | 1830.04 | 1830.03 | 0.01  | 1 | 58 | 9.90E-06 | 1 | LKDFPIANEPILGYLK                  | 9.21E+06 | control-Rep II     |
| gij20151469 | FBgn0037138 | 611.02  | 1830.03 | 1830.03 | 0.01  | 1 | 39 | 0.00085  | 1 | LKDFPIANEPILGYLK                  | 1.14E+07 | control-Rep I      |
| gij20151469 | FBgn0037138 | 745.89  | 1489.77 | 1489.76 | 0.01  | 0 | 45 | 0.00064  | 1 | MYVPESLWPQIK                      | 1.07E+07 | control-Rep II     |
| gij20151469 | FBgn0037138 | 745.89  | 1489.76 | 1489.76 | 0     | 0 | 41 | 0.0015   | 1 | MYVPESLWPQIK                      | 1.28E+07 | parkin null-Rep II |
| gij20151469 | FBgn0037138 | 745.9   | 1489.79 | 1489.76 | 0.02  | 0 | 33 | 0.0091   | 1 | MYVPESLWPQIK                      | 1.31E+07 | control-Rep I      |
| gij20151469 | FBgn0037138 | 745.89  | 1489.77 | 1489.76 | 0     | 0 | 48 | 0.00032  | 1 | MYVPESLWPQIK                      | 1.32E+07 | parkin null-Rep I  |
| gij20151469 | FBgn0037138 | 825.41  | 1648.81 | 1648.8  | 0.01  | 0 | 37 | 0.0066   | 1 | QVGNNIDNYVNFPR                    | 4.52E+06 | parkin null-Rep I  |
| gij20151469 | FBgn0037138 | 825.4   | 1648.79 | 1648.8  | -0.01 | 0 | 45 | 0.00079  | 1 | QVGNNIDNYVNFPR                    | 6.37E+06 | control-Rep I      |
| gij16197833 | FBgn0037643 | 635.35  | 1268.69 | 1268.69 | -0.01 | 0 | 65 | 6.70E-06 | 1 | DLNLNMPVVVR                       | 4.45E+06 | control-Rep II     |
| gij16197833 | FBgn0037643 | 635.35  | 1268.69 | 1268.69 | -0.01 | 0 | 47 | 0.0005   | 1 | DLNLNMPVVVR                       | 5.20E+06 | parkin null-Rep II |
| gij16197833 | FBgn0037643 | 635.36  | 1268.7  | 1268.69 | 0.01  | 0 | 35 | 0.003    | 1 | DLNLNMPVVVR                       | 6.47E+06 | parkin null-Rep I  |
| gij16197833 | FBgn0037643 | 635.35  | 1268.69 | 1268.69 | -0.01 | 0 | 49 | 0.0003   | 1 | DLNLNMPVVVR                       | 6.56E+06 | control-Rep I      |
| gij16197833 | FBgn0037643 | 703.83  | 1405.65 | 1405.65 | -0.01 | 0 | 21 | 0.056    | 1 | MDVNFEIPDAQK                      | 5.18E+06 | parkin null-Rep II |
| gij16197833 | FBgn0037643 | 703.83  | 1405.65 | 1405.65 | -0.01 | 0 | 24 | 0.03     | 1 | MDVNFEIPDAQK                      | 5.67E+06 | control-Rep I      |
| gij24646943 | FBgn0038271 | 971.47  | 1940.93 | 1940.94 | -0.02 | 0 | 67 | 3.40E-06 | 1 | CPAVAAVGPVENLPDYNR                | 3.30E+06 | parkin null-Rep I  |
| gij24646943 | FBgn0038271 | 971.48  | 1940.95 | 1940.94 | 0     | 0 | 77 | 2.00E-07 | 1 | CPAVAAVGPVENLPDYNR                | 6.39E+06 | parkin null-Rep II |
| gij24646943 | FBgn0038271 | 971.48  | 1940.94 | 1940.94 | 0     | 0 | 67 | 1.70E-06 | 1 | CPAVAAVGPVENLPDYNR                | 8.62E+06 | control-Rep I      |
| gij24646943 | FBgn0038271 | 449.79  | 897.57  | 897.56  | 0     | 0 | 31 | 0.0064   | 1 | IVLAAAGGVK                        | 3.01E+06 | parkin null-Rep II |
| gij24646943 | FBgn0038271 | 449.79  | 897.57  | 897.56  | 0     | 0 | 43 | 0.00039  | 1 | IVLAAAGGVK                        | 3.82E+06 | parkin null-Rep I  |
| gij24646943 | FBgn0038271 | 449.79  | 897.57  | 897.56  | 0     | 0 | 39 | 0.001    | 1 | IVLAAAGGVK                        | 4.54E+06 | control-Rep II     |
| gij24646943 | FBgn0038271 | 449.79  | 897.57  | 897.56  | 0     | 0 | 34 | 0.0029   | 1 | IVLAAAGGVK                        | 7.02E+06 | control-Rep I      |
| gij24646943 | FBgn0038271 | 719.35  | 1436.68 | 1436.66 | 0.02  | 0 | 58 | 1.60E-05 | 1 | LCTMVTEAEVER                      | 5.38E+06 | parkin null-Rep II |

|             |             |         |         |         |       |   |    |          |   |                         |          |                    |
|-------------|-------------|---------|---------|---------|-------|---|----|----------|---|-------------------------|----------|--------------------|
| gij24646943 | FBgn0038271 | 719.34  | 1436.67 | 1436.66 | 0     | 0 | 58 | 1.20E-05 | 1 | LCTMVTEAEVER            | 5.90E+06 | parkin null-Rep I  |
| gij24646943 | FBgn0038271 | 719.34  | 1436.67 | 1436.66 | 0.01  | 0 | 67 | 1.80E-06 | 1 | LCTMVTEAEVER            | 8.23E+06 | control-Rep II     |
| gij24646943 | FBgn0038271 | 719.34  | 1436.67 | 1436.66 | 0     | 0 | 71 | 1.20E-06 | 1 | LCTMVTEAEVER            | 1.10E+07 | control-Rep I      |
| gij24646943 | FBgn0038271 | 1074.03 | 2146.05 | 2146.04 | 0.01  | 0 | 72 | 9.40E-07 | 1 | TNMLLQLDGTTPICEDIGR     | 9.51E+05 | parkin null-Rep II |
| gij24646943 | FBgn0038271 | 1074.03 | 2146.05 | 2146.04 | 0.01  | 0 | 62 | 9.00E-06 | 1 | TNMLLQLDGTTPICEDIGR     | 2.63E+06 | control-Rep I      |
| gij38048721 | FBgn0038570 | 937.46  | 1872.91 | 1872.91 | -0.01 | 0 | 77 | 4.10E-07 | 1 | VGDSLPAVDLFDSPANK       | 2.55E+06 | parkin null-Rep I  |
| gij38048721 | FBgn0038570 | 937.47  | 1872.92 | 1872.91 | 0     | 0 | 81 | 8.80E-08 | 1 | VGDSLPAVDLFDSPANK       | 9.44E+06 | control-Rep II     |
| gij38048721 | FBgn0038570 | 937.47  | 1872.93 | 1872.91 | 0.02  | 0 | 73 | 6.20E-07 | 1 | VGDSLPAVDLFDSPANK       | 1.03E+07 | control-Rep I      |
| gij38048721 | FBgn0038570 | 825.44  | 1648.86 | 1648.86 | 0     | 0 | 31 | 0.01     | 1 | VIIFGVPGAFTPGCSK        | 1.61E+07 | parkin null-Rep II |
| gij38048721 | FBgn0038570 | 825.45  | 1648.88 | 1648.86 | 0.01  | 0 | 39 | 0.0014   | 1 | VIIFGVPGAFTPGCSK        | 1.77E+07 | control-Rep II     |
| gij38048721 | FBgn0038570 | 825.44  | 1648.87 | 1648.86 | 0.01  | 0 | 36 | 0.0039   | 1 | VIIFGVPGAFTPGCSK        | 1.96E+07 | control-Rep I      |
| gij38048721 | FBgn0038570 | 825.43  | 1648.85 | 1648.86 | -0.02 | 0 | 28 | 0.054    | 1 | VIIFGVPGAFTPGCSK        | 2.07E+07 | parkin null-Rep I  |
| gij24647881 | FBgn0038587 | 1160.68 | 2319.35 | 2319.32 | 0.03  | 0 | 75 | 5.60E-08 | 1 | ALVAIITNPVNTCVPIAAEILK  | 5.74E+06 | parkin null-Rep II |
| gij24647881 | FBgn0038587 | 1160.66 | 2319.31 | 2319.32 | -0.02 | 0 | 85 | 1.80E-08 | 1 | ALVAIITNPVNTCVPIAAEILK  | 5.95E+06 | control-Rep II     |
| gij24647881 | FBgn0038587 | 816.82  | 2447.43 | 2447.42 | 0.01  | 1 | 29 | 0.0015   | 1 | ALVAIITNPVNTCVPIAAEILKK | 1.87E+07 | control-Rep II     |
| gij24647881 | FBgn0038587 | 816.82  | 2447.44 | 2447.42 | 0.02  | 1 | 37 | 0.00023  | 1 | ALVAIITNPVNTCVPIAAEILKK | 2.30E+07 | control-Rep I      |
| gij24647881 | FBgn0038587 | 659.86  | 1317.71 | 1317.69 | 0.01  | 0 | 74 | 6.50E-07 | 1 | DDLFNVNAGIHK            | 9.52E+06 | parkin null-Rep I  |
| gij24647881 | FBgn0038587 | 659.86  | 1317.71 | 1317.69 | 0.01  | 0 | 48 | 0.00022  | 1 | DDLFNVNAGIHK            | 1.07E+07 | parkin null-Rep II |
| gij24647881 | FBgn0038587 | 659.86  | 1317.71 | 1317.69 | 0.01  | 0 | 60 | 1.50E-05 | 1 | DDLFNVNAGIHK            | 1.28E+07 | control-Rep II     |
| gij24647881 | FBgn0038587 | 659.85  | 1317.69 | 1317.69 | -0.01 | 0 | 56 | 4.10E-05 | 1 | DDLFNVNAGIHK            | 1.40E+07 | control-Rep I      |
| gij24647881 | FBgn0038587 | 537.3   | 1072.58 | 1072.58 | 0.01  | 0 | 28 | 0.037    | 1 | IQEAGTEVVK              | 1.20E+06 | parkin null-Rep II |
| gij24647881 | FBgn0038587 | 537.3   | 1072.59 | 1072.58 | 0.01  | 0 | 30 | 0.033    | 1 | IQEAGTEVVK              | 1.55E+06 | parkin null-Rep I  |
| gij24647881 | FBgn0038587 | 537.29  | 1072.57 | 1072.58 | 0     | 0 | 28 | 0.042    | 1 | IQEAGTEVVK              | 2.14E+06 | control-Rep II     |
| gij24647881 | FBgn0038587 | 537.3   | 1072.59 | 1072.58 | 0.01  | 0 | 27 | 0.06     | 1 | IQEAGTEVVK              | 2.22E+06 | control-Rep I      |
| gij24647881 | FBgn0038587 | 603.35  | 1204.69 | 1204.68 | 0     | 0 | 52 | 0.00011  | 1 | LFGVSTLDVVR             | 2.80E+07 | parkin null-Rep II |
| gij24647881 | FBgn0038587 | 603.35  | 1204.69 | 1204.68 | 0     | 0 | 52 | 7.10E-05 | 1 | LFGVSTLDVVR             | 3.11E+07 | parkin null-Rep I  |
| gij24647881 | FBgn0038587 | 603.35  | 1204.68 | 1204.68 | 0     | 0 | 52 | 7.30E-05 | 1 | LFGVSTLDVVR             | 3.18E+07 | control-Rep II     |
| gij24647881 | FBgn0038587 | 603.35  | 1204.69 | 1204.68 | 0     | 0 | 58 | 1.80E-05 | 1 | LFGVSTLDVVR             | 4.12E+07 | control-Rep I      |
| gij24647881 | FBgn0038587 | 746.89  | 1491.76 | 1491.76 | 0.01  | 0 | 63 | 7.20E-06 | 1 | TAGFIGADQLGDSLK         | 2.08E+07 | parkin null-Rep II |
| gij24647881 | FBgn0038587 | 746.89  | 1491.77 | 1491.76 | 0.01  | 0 | 71 | 1.10E-06 | 1 | TAGFIGADQLGDSLK         | 2.14E+07 | control-Rep II     |
| gij24647881 | FBgn0038587 | 746.89  | 1491.76 | 1491.76 | 0.01  | 0 | 60 | 1.40E-05 | 1 | TAGFIGADQLGDSLK         | 2.26E+07 | parkin null-Rep I  |
| gij24647881 | FBgn0038587 | 746.88  | 1491.75 | 1491.76 | -0.01 | 0 | 74 | 5.60E-07 | 1 | TAGFIGADQLGDSLK         | 2.94E+07 | control-Rep I      |
| gij21356183 | FBgn0038774 | 794.38  | 1586.75 | 1586.75 | 0     | 0 | 65 | 3.40E-06 | 1 | AHEGELNLQMGFNK          | 4.36E+06 | control-Rep II     |
| gij21356183 | FBgn0038774 | 794.38  | 1586.75 | 1586.75 | -0.01 | 0 | 46 | 0.00046  | 1 | AHEGELNLQMGFNK          | 5.72E+06 | parkin null-Rep I  |
| gij21356183 | FBgn0038774 | 794.39  | 1586.77 | 1586.75 | 0.01  | 0 | 56 | 4.90E-05 | 1 | AHEGELNLQMGFNK          | 6.09E+06 | parkin null-Rep II |
| gij21356183 | FBgn0038774 | 794.38  | 1586.75 | 1586.75 | 0     | 0 | 55 | 3.00E-05 | 1 | AHEGELNLQMGFNK          | 8.99E+06 | control-Rep I      |
| gij21356183 | FBgn0038774 | 725.86  | 1449.71 | 1449.7  | 0.01  | 0 | 54 | 5.90E-05 | 1 | GTNFQLMENIQR            | 5.93E+06 | parkin null-Rep II |
| gij21356183 | FBgn0038774 | 725.86  | 1449.7  | 1449.7  | 0     | 0 | 29 | 0.014    | 1 | GTNFQLMENIQR            | 7.49E+06 | control-Rep I      |
| gij21356183 | FBgn0038774 | 725.86  | 1449.7  | 1449.7  | 0     | 0 | 44 | 0.00049  | 1 | GTNFQLMENIQR            | 9.23E+06 | parkin null-Rep I  |

|             |             |         |         |         |       |   |    |          |   |                       |          |                    |
|-------------|-------------|---------|---------|---------|-------|---|----|----------|---|-----------------------|----------|--------------------|
| gij21356183 | FBgn0038774 | 1022    | 2041.98 | 2041.96 | 0.02  | 0 | 73 | 4.50E-07 | 1 | YGVPEEEIFQTADLFFER    | 1.19E+07 | parkin null-Rep II |
| gij21356183 | FBgn0038774 | 1022    | 2041.98 | 2041.96 | 0.02  | 0 | 72 | 5.70E-07 | 1 | YGVPEEEIFQTADLFFER    | 1.24E+07 | control-Rep I      |
| gij21356183 | FBgn0038774 | 1021.99 | 2041.97 | 2041.96 | 0.01  | 0 | 70 | 8.70E-07 | 1 | YGVPEEEIFQTADLFFER    | 1.24E+07 | parkin null-Rep I  |
| gij21356183 | FBgn0038774 | 1021.99 | 2041.97 | 2041.96 | 0.01  | 0 | 58 | 1.40E-05 | 1 | YGVPEEEIFQTADLFFER    | 1.30E+07 | control-Rep II     |
| gij24649832 | FBgn0039241 | 766.38  | 1530.75 | 1530.73 | 0.01  | 0 | 36 | 0.0064   | 1 | DVSEITGAPEMLGGR       | 7.18E+06 | control-Rep II     |
| gij24649832 | FBgn0039241 | 766.37  | 1530.73 | 1530.73 | -0.01 | 0 | 45 | 0.00066  | 1 | DVSEITGAPEMLGGR       | 7.61E+06 | parkin null-Rep II |
| gij24649832 | FBgn0039241 | 856.45  | 1710.89 | 1710.87 | 0.01  | 0 | 55 | 0.00013  | 1 | QLSGVALGSDAFFPFR      | 1.93E+06 | control-Rep II     |
| gij24649832 | FBgn0039241 | 856.45  | 1710.89 | 1710.87 | 0.01  | 0 | 30 | 0.042    | 1 | QLSGVALGSDAFFPFR      | 3.54E+06 | parkin null-Rep II |
| gij24649832 | FBgn0039241 | 856.44  | 1710.87 | 1710.87 | -0.01 | 0 | 49 | 0.00042  | 1 | QLSGVALGSDAFFPFR      | 4.72E+06 | control-Rep I      |
| gij24649832 | FBgn0039241 | 713.34  | 1424.66 | 1424.66 | 0     | 0 | 59 | 9.60E-06 | 1 | VTVVCEAVDYDR          | 5.89E+06 | parkin null-Rep II |
| gij24649832 | FBgn0039241 | 713.34  | 1424.67 | 1424.66 | 0     | 0 | 67 | 3.30E-06 | 1 | VTVVCEAVDYDR          | 7.48E+06 | parkin null-Rep I  |
| gij24649832 | FBgn0039241 | 713.34  | 1424.67 | 1424.66 | 0     | 0 | 90 | 1.60E-08 | 1 | VTVVCEAVDYDR          | 9.79E+06 | control-Rep I      |
| gij24651102 | FBgn0039685 | 812.38  | 2434.12 | 2434.13 | -0.02 | 0 | 33 | 0.0061   | 1 | AYHAGMCFMNSNLQLVQHSVK | 1.01E+07 | control-Rep II     |
| gij24651102 | FBgn0039685 | 812.39  | 2434.14 | 2434.13 | 0.01  | 0 | 36 | 0.0017   | 1 | AYHAGMCFMNSNLQLVQHSVK | 1.09E+07 | parkin null-Rep I  |
| gij24651102 | FBgn0039685 | 774.73  | 2321.17 | 2321.18 | 0     | 0 | 63 | 8.10E-06 | 1 | IHIQLAGPGVEVHESDEVHQK | 8.76E+07 | parkin null-Rep II |
| gij24651102 | FBgn0039685 | 774.74  | 2321.19 | 2321.18 | 0.01  | 0 | 55 | 5.50E-05 | 1 | IHIQLAGPGVEVHESDEVHQK | 1.01E+08 | parkin null-Rep I  |
| gij24651102 | FBgn0039685 | 774.73  | 2321.18 | 2321.18 | 0.01  | 0 | 55 | 5.00E-05 | 1 | IHIQLAGPGVEVHESDEVHQK | 1.02E+08 | control-Rep II     |
| gij24651102 | FBgn0039685 | 774.73  | 2321.18 | 2321.18 | 0     | 0 | 56 | 3.70E-05 | 1 | IHIQLAGPGVEVHESDEVHQK | 1.13E+08 | control-Rep I      |
| gij24651102 | FBgn0039685 | 570.8   | 1139.58 | 1139.58 | 0     | 0 | 40 | 0.0016   | 1 | VHASEELVEK            | 9.67E+06 | parkin null-Rep II |
| gij24651102 | FBgn0039685 | 570.8   | 1139.58 | 1139.58 | 0     | 0 | 39 | 0.0017   | 1 | VHASEELVEK            | 1.18E+07 | control-Rep II     |
| gij24651102 | FBgn0039685 | 570.8   | 1139.58 | 1139.58 | 0     | 0 | 41 | 0.0011   | 1 | VHASEELVEK            | 1.35E+07 | control-Rep I      |
| gij24651102 | FBgn0039685 | 570.8   | 1139.58 | 1139.58 | 0     | 0 | 43 | 0.0007   | 1 | VHASEELVEK            | 1.75E+07 | parkin null-Rep I  |
| gij24651102 | FBgn0039685 | 825.04  | 2472.1  | 2472.09 | 0.01  | 0 | 21 | 0.024    | 1 | WQYPDDAVTHCYLECFQK    | 3.59E+07 | control-Rep I      |
| gij24651102 | FBgn0039685 | 1237.05 | 2472.09 | 2472.09 | 0     | 0 | 64 | 8.20E-07 | 1 | WQYPDDAVTHCYLECFQK    | 3.60E+07 | control-Rep II     |
| gij24651183 | FBgn0039713 | 838.93  | 1675.85 | 1675.85 | -0.01 | 0 | 47 | 0.00031  | 1 | IADVYVYNASNNELVR      | 3.39E+06 | control-Rep II     |
| gij24651183 | FBgn0039713 | 838.93  | 1675.85 | 1675.85 | -0.01 | 0 | 56 | 4.20E-05 | 1 | IADVYVYNASNNELVR      | 3.84E+06 | parkin null-Rep I  |
| gij24651183 | FBgn0039713 | 838.94  | 1675.87 | 1675.85 | 0.01  | 0 | 50 | 0.00017  | 1 | IADVYVYNASNNELVR      | 6.91E+06 | parkin null-Rep II |
| gij24651183 | FBgn0039713 | 740.35  | 1478.69 | 1478.7  | -0.01 | 0 | 50 | 0.00013  | 1 | VEQALEDQFTSGR         | 1.91E+05 | parkin null-Rep II |
| gij24651183 | FBgn0039713 | 740.36  | 1478.71 | 1478.7  | 0.01  | 0 | 45 | 0.00055  | 1 | VEQALEDQFTSGR         | 1.12E+06 | control-Rep I      |
| gij24651183 | FBgn0039713 | 740.36  | 1478.71 | 1478.7  | 0.01  | 0 | 53 | 8.80E-05 | 1 | VEQALEDQFTSGR         | 1.58E+06 | control-Rep II     |
| gij24583090 | FBgn0040070 | 602.32  | 1202.63 | 1202.61 | 0.01  | 1 | 36 | 0.0083   | 1 | DKADLDGQLTK           | 1.11E+06 | parkin null-Rep II |
| gij24583090 | FBgn0040070 | 602.32  | 1202.63 | 1202.61 | 0.01  | 1 | 38 | 0.0056   | 1 | DKADLDGQLTK           | 1.38E+06 | parkin null-Rep I  |
| gij24583090 | FBgn0040070 | 602.32  | 1202.63 | 1202.61 | 0.01  | 1 | 36 | 0.0089   | 1 | DKADLDGQLTK           | 1.57E+06 | control-Rep II     |
| gij24583090 | FBgn0040070 | 602.32  | 1202.63 | 1202.61 | 0.01  | 1 | 39 | 0.0048   | 1 | DKADLDGQLTK           | 1.65E+06 | control-Rep I      |
| gij24583090 | FBgn0040070 | 518.26  | 1034.51 | 1034.5  | 0     | 0 | 27 | 0.042    | 1 | VEEFAGANAK            | 9.59E+05 | parkin null-Rep I  |
| gij24583090 | FBgn0040070 | 518.26  | 1034.51 | 1034.5  | 0     | 0 | 31 | 0.016    | 1 | VEEFAGANAK            | 1.05E+06 | control-Rep II     |
| gij24583090 | FBgn0040070 | 518.26  | 1034.51 | 1034.5  | 0     | 0 | 31 | 0.02     | 1 | VEEFAGANAK            | 1.34E+06 | control-Rep I      |
| gij24641739 | FBgn0040309 | 805.89  | 1609.77 | 1609.76 | 0.01  | 0 | 42 | 0.00077  | 1 | DYGVLEDEETGIPFR       | 1.49E+07 | control-Rep II     |
| gij24641739 | FBgn0040309 | 805.89  | 1609.77 | 1609.76 | 0     | 0 | 43 | 0.00044  | 1 | DYGVLEDEETGIPFR       | 1.88E+07 | parkin null-Rep II |

|             |             |         |         |         |       |   |     |          |   |                             |          |                    |
|-------------|-------------|---------|---------|---------|-------|---|-----|----------|---|-----------------------------|----------|--------------------|
| gij24641739 | FBgn0040309 | 805.89  | 1609.77 | 1609.76 | 0     | 0 | 32  | 0.0054   | 1 | DYGVLDEETGIPFR              | 2.14E+07 | parkin null-Rep I  |
| gij24641739 | FBgn0040309 | 805.9   | 1609.78 | 1609.76 | 0.02  | 0 | 46  | 0.00025  | 1 | DYGVLDEETGIPFR              | 2.18E+07 | control-Rep I      |
| gij24641739 | FBgn0040309 | 714.07  | 2139.19 | 2139.18 | 0.01  | 0 | 60  | 5.80E-06 | 1 | PQLQKPAPAFAGTAVVNGVFK       | 9.72E+06 | control-Rep II     |
| gij24641739 | FBgn0040309 | 714.07  | 2139.19 | 2139.18 | 0.01  | 0 | 49  | 6.60E-05 | 1 | PQLQKPAPAFAGTAVVNGVFK       | 1.21E+07 | parkin null-Rep II |
| gij24641739 | FBgn0040309 | 714.07  | 2139.19 | 2139.18 | 0     | 0 | 70  | 6.20E-07 | 1 | PQLQKPAPAFAGTAVVNGVFK       | 1.26E+07 | control-Rep I      |
| gij24650465 | FBgn0051075 | 853.46  | 1704.91 | 1704.91 | 0     | 0 | 57  | 4.30E-05 | 1 | IAQEEIFGPVQSIFK             | 1.06E+07 | control-Rep I      |
| gij24650465 | FBgn0051075 | 853.47  | 1704.92 | 1704.91 | 0.01  | 0 | 72  | 1.20E-06 | 1 | IAQEEIFGPVQSIFK             | 1.23E+07 | parkin null-Rep II |
| gij24650465 | FBgn0051075 | 853.47  | 1704.93 | 1704.91 | 0.02  | 0 | 69  | 1.30E-06 | 1 | IAQEEIFGPVQSIFK             | 1.23E+07 | parkin null-Rep I  |
| gij24650465 | FBgn0051075 | 623.84  | 1245.67 | 1245.68 | -0.01 | 0 | 64  | 7.80E-06 | 1 | IVMQAAATSNLK                | 3.22E+06 | control-Rep II     |
| gij24650465 | FBgn0051075 | 623.84  | 1245.68 | 1245.68 | 0     | 0 | 63  | 8.30E-06 | 1 | IVMQAAATSNLK                | 3.87E+06 | parkin null-Rep I  |
| gij24650465 | FBgn0051075 | 623.84  | 1245.67 | 1245.68 | -0.01 | 0 | 63  | 9.10E-06 | 1 | IVMQAAATSNLK                | 4.25E+06 | control-Rep I      |
| gij24650465 | FBgn0051075 | 623.85  | 1245.69 | 1245.68 | 0.01  | 0 | 60  | 1.60E-05 | 1 | IVMQAAATSNLK                | 4.41E+06 | parkin null-Rep II |
| gij84876    | FBgn0000024 | 814.7   | 2441.09 | 2441.11 | -0.02 | 0 | 28  | 0.023    | 1 | R.AVGDHFFTCPTNEYAQAALR.G    | 1.30     | F&H (2D-GIST)      |
| gij17136862 | FBgn0000024 | 932.01  | 1862    | 1862    | 0.01  | 0 | 39  | 0.0077   | 1 | R.KPVPAPWGHVLDATRL          | 1.16     | R&H (2D-GIST)      |
| gij17136862 | FBgn0000024 | 722.73  | 2165.17 | 2165.17 | 0.01  | 1 | 60  | 4.90E-05 | 1 | R.FRKPVPAPWGHVLDATRL        | 1.01     | F&H (2D-GIST)      |
| gij17136862 | FBgn0000024 | 722.73  | 2165.17 | 2165.17 | 0.01  | 1 | 46  | 0.0012   | 1 | R.FRKPVPAPWGHVLDATRL        | 1.05     | R&H (2D-GIST)      |
| gij131613   | FBgn0000053 | 549.97  | 1646.88 | 1646.87 | 0     | 0 | 49  | 0.0007   | 1 | K.ALAHITGGGLSENIPR.V        | 0.80     | F&H (2D-GIST)      |
| gij131613   | FBgn0000053 | 824.45  | 1646.88 | 1646.87 | 0.01  | 0 | 67  | 1.20E-05 | 1 | K.ALAHITGGGLSENIPR.V        | 1.07     | F&H (2D-GIST)      |
| gij131613   | FBgn0000053 | 944.51  | 1887    | 1887.01 | -0.01 | 0 | 55  | 0.00018  | 1 | R.GTQRPVIGGLGGFGLFR.L       | 1.34     | F&H (2D-GIST)      |
| gij131613   | FBgn0000053 | 825.96  | 1649.9  | 1649.89 | 0.01  | 0 | 51  | 0.00045  | 1 | K.ALAHITGGGLSENIPR.V        | 1.04     | R&H (2D-GIST)      |
| gij131613   | FBgn0000053 | 946.02  | 1890.02 | 1890.03 | -0.01 | 0 | 48  | 0.00084  | 1 | R.GTQRPVIGGLGGFGLFR.L       | 1.15     | F&H (2D-GIST)      |
| gij131613   | FBgn0000053 | 825.95  | 1649.9  | 1649.89 | 0     | 0 | 62  | 4.20E-05 | 1 | K.ALAHITGGGLSENIPR.V        | 1.06     | R&H (2D-GIST)      |
| gij131613   | FBgn0000053 | 944.52  | 1887.03 | 1887.01 | 0.01  | 0 | 60  | 4.70E-05 | 1 | R.GTQRPVIGGLGGFGLFR.L       | 0.92     | R&L (2D-GIST)      |
| gij131613   | FBgn0000053 | 528.26  | 1054.5  | 1054.5  | 0     | 0 | 37  | 0.0052   | 1 | K.AEHWAFPR.A                | 0.90     | R&L (2D-GIST)      |
| gij131613   | FBgn0000053 | 563.99  | 1688.95 | 1688.94 | 0.01  | 0 | 47  | 0.0012   | 1 | K.SVAHVTHGLLDLRL            | 0.91     | F&H (2D-GIST)      |
| gij311725   | FBgn0000053 | 562.98  | 1685.93 | 1685.92 | 0     | 0 | 64  | 2.00E-05 | 1 | K.SVAHVTHGLLDLRL            | 1.09     | R&L (2D-GIST)      |
| gij131613   | FBgn0000053 | 843.97  | 1685.93 | 1685.92 | 0.01  | 0 | 53  | 0.0002   | 1 | K.SVAHVTHGLLDLRL            | 1.17     | R&L (2D-GIST)      |
| gij113424   | FBgn0000055 | 1043.56 | 2085.11 | 2085.08 | 0.03  | 0 | 93  | 2.80E-08 | 1 | K.LLAHPTQPSLACAENFVK.A      | 0.69     | F&H (2D-GIST)      |
| gij8282     | FBgn0000055 | 694.03  | 2079.07 | 2079.05 | 0.03  | 0 | 58  | 0.0001   | 1 | K.LLAHPTQPSLACAENFVK.A      | 0.68     | F&H (2D-GIST)      |
| gij8282     | FBgn0000055 | 1060.56 | 2119.11 | 2119.09 | 0.02  | 0 | 96  | 1.50E-08 | 1 | K.TVDVLINGAGILDDHQIER.T     | 1.39     | F&H (2D-GIST)      |
| gij113424   | FBgn0000055 | 1043.56 | 2085.11 | 2085.08 | 0.02  | 0 | 96  | 1.40E-08 | 1 | K.LLAHPTQPSLACAENFVK.A      | 1.15     | R&H (2D-GIST)      |
| gij113424   | FBgn0000055 | 626.85  | 1251.68 | 1251.67 | 0.01  | 0 | 70  | 4.30E-06 | 1 | R.IENPAAIAELK.A             | 0.79     | R&L (2D-GIST)      |
| gij8282     | FBgn0000055 | 694.03  | 2079.06 | 2079.05 | 0.01  | 0 | 46  | 0.0016   | 1 | K.LLAHPTQPSLACAENFVK.A      | 1.04     | R&L (2D-GIST)      |
| gij113424   | FBgn0000055 | 646.35  | 1290.69 | 1290.68 | 0.01  | 0 | 53  | 0.00032  | 1 | K.AAVVNFTSSLAK.L            | 1.06     | R&L (2D-GIST)      |
| gij217318   | FBgn0000064 | 835.97  | 1669.92 | 1669.91 | 0.01  | 0 | 41  | 0.005    | 1 | K.NTPPEIALATVQALR.R         | 0.86     | F&H (2D-GIST)      |
| gij217318   | FBgn0000064 | 972.48  | 1942.95 | 1942.93 | 0.02  | 0 | 73  | 2.70E-06 | 1 | K.YVAGSAGAGSGSLFVANHAY.-    | 1.06     | F&H (2D-GIST)      |
| gij217318   | FBgn0000064 | 1217.63 | 2433.24 | 2433.21 | 0.03  | 0 | 46  | 0.0013   | 1 | K.GVVPLFGSEDEVTTQGLDDLAAR.C | 1.11     | F&H (2D-GIST)      |
| gij68194    | FBgn0000064 | 968     | 1933.99 | 1933.99 | 0     | 0 | 57  | 0.00012  | 1 | K.NTPSYQSILENANVLAR.Y       | 1.18     | F&H (2D-GIST)      |
| gij217318   | FBgn0000064 | 1085.56 | 2169.11 | 2169.1  | 0.01  | 0 | 113 | 2.90E-10 | 1 | R.IVPIVEVPLPDGDHDLDR.A      | 1.31     | F&H (2D-GIST)      |

|             |             |         |         |         |       |   |     |          |   |                                     |      |               |
|-------------|-------------|---------|---------|---------|-------|---|-----|----------|---|-------------------------------------|------|---------------|
| gij217318   | FBgn0000064 | 1216.11 | 2430.21 | 2430.19 | 0.01  | 0 | 61  | 4.60E-05 | 1 | K.GVVPLFGSEDEVTTQGLDDLAAR.C         | 0.80 | R&L (2D-GIST) |
| gij217318   | FBgn0000064 | 1085.57 | 2169.12 | 2169.1  | 0.02  | 0 | 108 | 8.70E-10 | 1 | R.IVPIVEPEVLPGDGHDLDR.A             | 0.86 | R&L (2D-GIST) |
| gij217318   | FBgn0000064 | 966.5   | 1930.98 | 1930.97 | 0     | 0 | 63  | 3.30E-05 | 1 | K.NTPSYQSILENANVLAR.Y               | 0.97 | R&L (2D-GIST) |
| gij217318   | FBgn0000064 | 970.97  | 1939.92 | 1939.91 | 0.01  | 0 | 81  | 3.70E-07 | 1 | K.YVAGSAGAGSGSLFVANHAY.-            | 1.19 | R&L (2D-GIST) |
| gij217318   | FBgn0000064 | 834.46  | 1666.91 | 1666.89 | 0.02  | 0 | 46  | 0.0015   | 1 | K.NTPPEIALATVQALR.R                 | 1.33 | R&L (2D-GIST) |
| gij68193    | FBgn0000064 | 850.92  | 1699.82 | 1699.81 | 0.01  | 1 | 39  | 0.0061   | 1 | K.RLQDIGVENTEDNR.R                  | 0.71 | F&H (2D-GIST) |
| gij217318   | FBgn0000064 | 852.43  | 1702.84 | 1702.83 | 0.01  | 1 | 43  | 0.0022   | 1 | K.RLQDIGVENTEDNR.R                  | 0.91 | F&H (2D-GIST) |
| gij217318   | FBgn0000064 | 852.42  | 1702.83 | 1702.83 | 0     | 1 | 39  | 0.0052   | 1 | R.LQDIGVENTEDNRR.A                  | 1.14 | F&H (2D-GIST) |
| gij17136288 | FBgn0000084 | 643.43  | 1284.84 | 1284.83 | 0.01  | 1 | 42  | 0.0002   | 1 | R.RLLTLIVTGVR.D                     | 0.65 | F&H (2D-GIST) |
| gij71777    | FBgn0000084 | 664.84  | 1327.67 | 1327.67 | 0     | 0 | 42  | 0.0044   | 1 | R.IMSHASFPQLR.L                     | 0.87 | F&H (2D-GIST) |
| gij71777    | FBgn0000084 | 1125.02 | 2248.02 | 2248    | 0.01  | 0 | 61  | 1.80E-05 | 1 | R.YQRPLAEQMCSETSGFFR.R              | 0.81 | R&L (2D-GIST) |
| gij71777    | FBgn0000084 | 664.84  | 1327.67 | 1327.67 | 0     | 0 | 41  | 0.005    | 1 | R.IMSHASFPQLR.L                     | 1.19 | R&L (2D-GIST) |
| gij113987   | FBgn0000100 | 1339.78 | 2677.54 | 2677.52 | 0.02  | 0 | 56  | 1.80E-05 | 1 | R.APARPGAIAPLHVIIAQNNTGLGPEK.T      | 0.94 | R&H (2D-GIST) |
| gij113987   | FBgn0000100 | 891.51  | 2671.5  | 2671.48 | 0.02  | 0 | 40  | 0.0011   | 1 | R.APARPGAIAPLHVIIAQNNTGLGPEK.T      | 1.13 | R&L (2D-GIST) |
| gij113987   | FBgn0000100 | 978.57  | 2932.7  | 2932.69 | 0.01  | 1 | 51  | 4.90E-05 | 1 | K.VRAPARPGAIAPLHVIIAQNNTGLGPEK.T    | 1.02 | F&H (2D-GIST) |
| gij1346366  | FBgn0000116 | 1144.57 | 3430.69 | 3430.66 | 0.03  | 2 | 47  | 0.00075  | 1 | K.KTDKHPASNFGDVSTFGNVDPNTNEYVISTR.V | 1.11 | F&H (2D-GIST) |
| gij24661348 | FBgn0000116 | 893.47  | 1784.92 | 1784.91 | 0.01  | 0 | 57  | 0.00015  | 1 | K.AVQQQLIDDHFLFK.E                  | 0.89 | F&H (2D-GIST) |
| gij24661348 | FBgn0000116 | 678.38  | 1354.76 | 1354.75 | 0.01  | 1 | 66  | 1.60E-05 | 1 | R.LVTAVNEIEKR.V                     | 0.92 | F&H (2D-GIST) |
| gij24661348 | FBgn0000116 | 895.39  | 1788.77 | 1788.78 | -0.01 | 0 | 62  | 7.30E-06 | 1 | R.GEHTEAEGGVYDISNK.R                | 0.93 | F&H (2D-GIST) |
| gij24661348 | FBgn0000116 | 926.99  | 1851.97 | 1851.96 | 0.02  | 0 | 76  | 1.60E-06 | 1 | R.LGFLFCPTNLGTTIR.A                 | 1.06 | F&H (2D-GIST) |
| gij24661348 | FBgn0000116 | 702.37  | 1402.73 | 1402.72 | 0.01  | 0 | 59  | 8.10E-05 | 1 | K.VSSTLSGLEGELK.G                   | 1.07 | F&H (2D-GIST) |
| gij24661348 | FBgn0000116 | 607.82  | 1213.62 | 1213.62 | 0.01  | 0 | 37  | 0.01     | 1 | R.MGLTEFEAVK.E                      | 0.92 | R&H (2D-GIST) |
| gij24661348 | FBgn0000116 | 896.49  | 1790.96 | 1790.95 | 0.01  | 0 | 68  | 1.20E-05 | 1 | K.AVQQQLIDDHFLFK.E                  | 0.97 | R&H (2D-GIST) |
| gij24661348 | FBgn0000116 | 681.4   | 1360.79 | 1360.78 | 0.01  | 1 | 69  | 5.20E-06 | 1 | R.LVTAVNEIEKR.V                     | 1.00 | R&H (2D-GIST) |
| gij24661348 | FBgn0000116 | 599.28  | 1794.82 | 1794.82 | 0     | 0 | 28  | 0.031    | 1 | R.GEHTEAEGGVYDISNK.R                | 1.00 | R&H (2D-GIST) |
| gij24661348 | FBgn0000116 | 898.42  | 1794.82 | 1794.82 | 0.01  | 0 | 64  | 9.70E-06 | 1 | R.GEHTEAEGGVYDISNK.R                | 1.08 | R&H (2D-GIST) |
| gij24661348 | FBgn0000116 | 702.37  | 1402.73 | 1402.72 | 0.01  | 0 | 53  | 0.00038  | 1 | K.VSSTLSGLEGELK.G                   | 1.04 | R&L (2D-GIST) |
| gij24661348 | FBgn0000116 | 600.33  | 1198.65 | 1198.64 | 0.01  | 0 | 51  | 0.00059  | 1 | R.LVTAVNEIEK.R                      | 1.08 | R&L (2D-GIST) |
| gij24661348 | FBgn0000116 | 976.47  | 1950.92 | 1950.92 | 0     | 1 | 97  | 5.70E-09 | 1 | R.GEHTEAEGGVYDISNK.R                | 1.08 | F&H (2D-GIST) |
| gij24661348 | FBgn0000116 | 649.3   | 1944.89 | 1944.88 | 0     | 1 | 40  | 0.0027   | 1 | R.GEHTEAEGGVYDISNK.R                | 0.99 | F&H (2D-GIST) |
| gij24661348 | FBgn0000116 | 957.12  | 2868.35 | 2868.34 | 0.01  | 0 | 30  | 0.023    | 1 | K.HPASNFGDVSTFGNVDPNTNEYVISTR.V     | 0.64 | R&H (2D-GIST) |
| gij24661348 | FBgn0000116 | 1435.19 | 2868.37 | 2868.34 | 0.03  | 0 | 46  | 0.0007   | 1 | K.HPASNFGDVSTFGNVDPNTNEYVISTR.V     | 0.81 | R&H (2D-GIST) |
| gij24661348 | FBgn0000116 | 976.47  | 1950.93 | 1950.92 | 0.01  | 1 | 96  | 8.60E-09 | 1 | R.GEHTEAEGGVYDISNK.R                | 1.12 | R&H (2D-GIST) |
| gij24661348 | FBgn0000116 | 875.9   | 1749.79 | 1749.79 | 0.01  | 0 | 58  | 2.90E-05 | 1 | R.GEHTEAEGGVYDISNK.R                | 1.45 | R&H (2D-GIST) |
| gij24661348 | FBgn0000116 | 649.3   | 1944.89 | 1944.88 | 0.01  | 1 | 42  | 0.0019   | 1 | R.GEHTEAEGGVYDISNK.R                | 1.13 | R&L (2D-GIST) |
| gij24661348 | FBgn0000116 | 880.91  | 1759.81 | 1759.8  | 0.01  | 0 | 71  | 2.30E-06 | 1 | K.TFLVWCNEEDHLR.I                   | 0.77 | F&H (2D-GIST) |
| gij24661348 | FBgn0000116 | 756.43  | 1510.84 | 1510.85 | 0     | 2 | 36  | 0.015    | 1 | K.RLVTAVNEIEKR.V                    | 0.92 | F&H (2D-GIST) |
| gij24661348 | FBgn0000116 | 880.91  | 1759.8  | 1759.8  | 0.01  | 0 | 66  | 7.60E-06 | 1 | K.TFLVWCNEEDHLR.I                   | 1.10 | R&L (2D-GIST) |
| gij24661348 | FBgn0000116 | 756.43  | 1510.85 | 1510.85 | 0     | 2 | 41  | 0.004    | 1 | K.RLVTAVNEIEKR.V                    | 1.25 | R&L (2D-GIST) |

|             |             |         |         |         |       |   |     |          |   |                              |      |               |
|-------------|-------------|---------|---------|---------|-------|---|-----|----------|---|------------------------------|------|---------------|
| gil1346366  | FBgn0000116 | 882.42  | 1762.82 | 1762.82 | 0     | 0 | 50  | 0.0003   | 1 | K.TFLVWCNEEDHLR.I            | 1.01 | R&H (2D-GIST) |
| gil1346366  | FBgn0000116 | 882.42  | 1762.82 | 1762.82 | 0     | 0 | 49  | 0.00035  | 1 | K.TFLVWCNEEDHLR.I            | 0.74 | R&H (2D-GIST) |
| gil114211   | FBgn0000121 | 564.78  | 1127.54 | 1127.54 | 0     | 0 | 40  | 0.0027   | 1 | R.EIYYHGK.T                  | 0.68 | F&H (2D-GIST) |
| gil114211   | FBgn0000121 | 684.37  | 1366.73 | 1366.72 | 0.01  | 1 | 67  | 9.70E-06 | 1 | R.KVFGQLATTYR.Y              | 0.68 | F&H (2D-GIST) |
| gil114211   | FBgn0000121 | 599.32  | 1196.62 | 1196.62 | 0.01  | 0 | 77  | 1.10E-06 | 1 | K.VFGQLATTYR.Y               | 0.74 | F&H (2D-GIST) |
| gil114211   | FBgn0000121 | 599.32  | 1196.63 | 1196.62 | 0.01  | 0 | 46  | 0.0012   | 1 | K.VFGQLATTYR.Y               | 1.13 | R&L (2D-GIST) |
| gil114211   | FBgn0000121 | 684.38  | 1366.74 | 1366.72 | 0.01  | 1 | 67  | 9.10E-06 | 1 | R.KVFGQLATTYR.Y              | 1.19 | R&L (2D-GIST) |
| gil114211   | FBgn0000121 | 572.81  | 1143.61 | 1143.6  | 0     | 0 | 48  | 0.0016   | 1 | R.HGIALDGHK.D                | 0.70 | F&H (2D-GIST) |
| gil127980   | FBgn0000150 | 780.39  | 1558.77 | 1558.77 | 0     | 0 | 45  | 0.0014   | 1 | R.NIHGSDAVESA.E              | 0.68 | R&H (2D-GIST) |
| gil127980   | FBgn0000150 | 737.89  | 1473.77 | 1473.76 | 0.01  | 0 | 46  | 0.0019   | 1 | R.TFIMVKPDGVQR.G             | 0.72 | R&L (2D-GIST) |
| gil17985987 | FBgn0000171 | 941.17  | 2820.49 | 2820.46 | 0.02  | 0 | 34  | 0.014    | 1 | K.TAAFLVPILNQMYELGHVPPQSTR.Q | 1.00 | R&L (2D-GIST) |
| gil17985987 | FBgn0000171 | 953.11  | 2856.32 | 2856.31 | 0.01  | 1 | 66  | 4.90E-06 | 1 | K.KGADSLLEFLYQCNHPVTSIHGDR.T | 0.81 | F&H (2D-GIST) |
| gil17985987 | FBgn0000171 | 955.13  | 2862.38 | 2862.35 | 0.02  | 1 | 61  | 2.30E-05 | 1 | K.KGADSLLEFLYQCNHPVTSIHGDR.T | 1.26 | F&H (2D-GIST) |
| gil17985987 | FBgn0000171 | 704.35  | 2110.02 | 2110.01 | 0.01  | 0 | 53  | 0.00021  | 1 | K.HVINFDLPSDVEEYVHR.I        | 0.80 | F&H (2D-GIST) |
| gil17985987 | FBgn0000171 | 953.12  | 2856.33 | 2856.31 | 0.02  | 1 | 43  | 0.0012   | 1 | K.KGADSLLEFLYQCNHPVTSIHGDR.T | 1.23 | R&L (2D-GIST) |
| gil103078   | FBgn0000206 | 815.42  | 1628.82 | 1628.81 | 0.01  | 0 | 47  | 0.0014   | 1 | K.VAHLHLQMPWGEK.I            | 0.77 | F&H (2D-GIST) |
| gil283657   | FBgn0000206 | 815.42  | 1628.83 | 1628.81 | 0.02  | 0 | 56  | 0.00019  | 1 | K.VAHLHLQMPWGEK.I            | 0.89 | R&L (2D-GIST) |
| gil103078   | FBgn0000206 | 829.4   | 2485.17 | 2485.17 | 0.01  | 0 | 36  | 0.0099   | 1 | R.HCSQDEVNHQSPSEIPTLPLR.G    | 1.21 | F&H (2D-GIST) |
| gil18461323 | FBgn0000239 | 916.96  | 1831.9  | 1831.9  | 0     | 1 | 55  | 0.00012  | 1 | R.VVEPLCDFHKDEV.R.D          | 1.02 | R&H (2D-GIST) |
| gil18461323 | FBgn0000239 | 709.37  | 2125.1  | 2125.1  | 0     | 0 | 32  | 0.042    | 1 | R.ALYPHQIIAVHVDNGFMR.K       | 0.71 | R&H (2D-GIST) |
| gil24643292 | FBgn0000257 | 894.49  | 1786.97 | 1786.97 | 0     | 0 | 65  | 1.80E-05 | 1 | K.TILLHSGEQLYAE.LR.N         | 1.21 | F&H (2D-GIST) |
| gil24643292 | FBgn0000257 | 745.48  | 1488.94 | 1488.93 | 0.01  | 0 | 46  | 1.00E-04 | 1 | R.LLALKPELHLPR.E             | 1.10 | R&H (2D-GIST) |
| gil24643292 | FBgn0000257 | 721.39  | 2161.14 | 2161.13 | 0.01  | 0 | 39  | 0.0067   | 1 | K.ATSEHTAIAGLLHEQVNAVR.F     | 1.42 | F&H (2D-GIST) |
| gil17981717 | FBgn0000261 | 1144.56 | 2287.1  | 2287.09 | 0.01  | 0 | 100 | 5.70E-09 | 1 | R.GPILLQDVNFLDEMESHFDR.E     | 1.18 | F&H (2D-GIST) |
| gil17981717 | FBgn0000261 | 723.05  | 2166.13 | 2166.12 | 0.01  | 0 | 60  | 4.40E-05 | 1 | R.LVQNIAGHLSNASQFLQER.A      | 1.22 | F&H (2D-GIST) |
| gil17981717 | FBgn0000261 | 1084.06 | 2166.11 | 2166.12 | -0.01 | 0 | 89  | 6.50E-08 | 1 | R.LVQNIAGHLSNASQFLQER.A      | 1.25 | F&H (2D-GIST) |
| gil17981717 | FBgn0000261 | 1146.07 | 2290.13 | 2290.11 | 0.02  | 0 | 85  | 1.80E-07 | 1 | R.GPILLQDVNFLDEMESHFDR.E     | 0.76 | R&H (2D-GIST) |
| gil17981717 | FBgn0000261 | 1085.59 | 2169.16 | 2169.14 | 0.02  | 0 | 58  | 8.50E-05 | 1 | R.LVQNIAGHLSNASQFLQER.A      | 0.94 | R&H (2D-GIST) |
| gil17981717 | FBgn0000261 | 763.37  | 2287.1  | 2287.09 | 0.01  | 0 | 43  | 0.0026   | 1 | R.GPILLQDVNFLDEMESHFDR.E     | 0.87 | R&L (2D-GIST) |
| gil17981717 | FBgn0000261 | 723.05  | 2166.13 | 2166.12 | 0.01  | 0 | 72  | 3.00E-06 | 1 | R.LVQNIAGHLSNASQFLQER.A      | 1.04 | R&L (2D-GIST) |
| gil17981717 | FBgn0000261 | 668.83  | 1335.64 | 1335.64 | 0     | 0 | 52  | 0.00024  | 1 | K.NFTQVHADDFGR.M             | 0.90 | F&H (2D-GIST) |
| gil17981717 | FBgn0000261 | 1084.07 | 2166.13 | 2166.12 | 0.01  | 0 | 75  | 1.70E-06 | 1 | R.LVQNIAGHLSNASQFLQER.A      | 0.62 | R&L (2D-GIST) |
| gil17981717 | FBgn0000261 | 1144.56 | 2287.11 | 2287.09 | 0.02  | 0 | 111 | 4.70E-10 | 1 | R.GPILLQDVNFLDEMESHFDR.E     | 0.85 | R&L (2D-GIST) |
| gil17981717 | FBgn0000261 | 1056.94 | 2111.86 | 2111.85 | 0.01  | 0 | 60  | 3.50E-06 | 1 | R.GTPDGYCHMNGYGSHTFK.L       | 1.04 | R&L (2D-GIST) |
| gil17981717 | FBgn0000261 | 723.05  | 2166.13 | 2166.12 | 0.01  | 0 | 39  | 0.0064   | 1 | R.LVQNIAGHLSNASQFLQER.A      | 1.14 | R&L (2D-GIST) |
| gil17981717 | FBgn0000261 | 667.32  | 1332.62 | 1332.62 | 0     | 0 | 48  | 0.00052  | 1 | K.NFTQVHADDFGR.M             | 1.30 | R&L (2D-GIST) |
| gil45552299 | FBgn0000273 | 832.91  | 1663.8  | 1663.8  | 0     | 1 | 55  | 0.00011  | 1 | R.RNPTNTAALDDFER.I           | 0.92 | F&H (2D-GIST) |
| gil45552299 | FBgn0000273 | 737.38  | 1472.74 | 1472.74 | 0     | 1 | 49  | 0.00089  | 1 | K.VRFPESHFGSDLK.D            | 0.91 | F&H (2D-GIST) |
| gil45552299 | FBgn0000273 | 831.4   | 1660.79 | 1660.78 | 0     | 1 | 66  | 1.30E-05 | 1 | R.RNPTNTAALDDFER.I           | 0.94 | R&L (2D-GIST) |

|             |            |         |         |         |      |   |     |          |   |                                   |      |               |
|-------------|------------|---------|---------|---------|------|---|-----|----------|---|-----------------------------------|------|---------------|
| gij279511   | FBgn000275 | 1034.05 | 2066.09 | 2066.09 | 0    | 0 | 46  | 0.0016   | 1 | R.LGSSDYFGEIALLDRPR.A             | 0.79 | F&H (2D-GIST) |
| gij279511   | FBgn000275 | 737.87  | 1473.74 | 1473.73 | 0.01 | 0 | 56  | 0.00013  | 1 | K.NVLF AHLDESER.S                 | 1.03 | F&H (2D-GIST) |
| gij84915    | FBgn000303 | 533.31  | 1064.6  | 1064.6  | 0    | 0 | 65  | 1.00E-05 | 1 | R.LLDGILSHR.E                     | 1.10 | F&H (2D-GIST) |
| gij84915    | FBgn000303 | 759.42  | 1516.82 | 1516.82 | 0.01 | 0 | 34  | 0.023    | 1 | R.LEWHVGPQLQR.F                   | 1.07 | R&L (2D-GIST) |
| gij84915    | FBgn000303 | 533.31  | 1064.6  | 1064.6  | 0    | 0 | 63  | 1.70E-05 | 1 | R.LLDGILSHR.E                     | 1.16 | R&L (2D-GIST) |
| gij84914    | FBgn000313 | 710.7   | 2129.07 | 2129.05 | 0.02 | 0 | 30  | 0.049    | 1 | K.ISGNHLTEIPDDAFTGLER.S           | 1.21 | F&H (2D-GIST) |
| gij84914    | FBgn000313 | 1065.54 | 2129.07 | 2129.05 | 0.02 | 0 | 71  | 4.20E-06 | 1 | K.ISGNHLTEIPDDAFTGLER.S           | 1.29 | F&H (2D-GIST) |
| gij84914    | FBgn000313 | 859.43  | 1716.84 | 1716.83 | 0.01 | 0 | 39  | 0.005    | 1 | K.MSHGYSGSALPAEPLR.H              | 0.91 | F&H (2D-GIST) |
| gij17864142 | FBgn000313 | 1326.2  | 2650.38 | 2650.36 | 0.02 | 0 | 108 | 1.00E-09 | 1 | R.MLDLSNNDLTVPLMTQALPHLR.R        | 0.74 | R&H (2D-GIST) |
| gij17864142 | FBgn000313 | 1355.23 | 2708.44 | 2708.41 | 0.03 | 0 | 34  | 0.017    | 1 | K.LNLDNLHLEYNHIEVLPNSFK.Y         | 0.82 | R&H (2D-GIST) |
| gij17864142 | FBgn000313 | 884.46  | 2650.37 | 2650.36 | 0.01 | 0 | 29  | 0.089    | 1 | R.MLDLSNNDLTVPLMTQALPHLR.R        | 0.82 | R&H (2D-GIST) |
| gij17864142 | FBgn000313 | 859.43  | 1716.84 | 1716.83 | 0    | 0 | 49  | 0.00048  | 1 | K.MSHGYSGSALPAEPLR.H              | 0.91 | R&H (2D-GIST) |
| gij84914    | FBgn000313 | 730.37  | 1458.73 | 1458.73 | 0    | 0 | 64  | 2.90E-05 | 1 | R.TFFDGNPIHTLR.E                  | 0.84 | F&H (2D-GIST) |
| gij84914    | FBgn000313 | 745.37  | 1488.73 | 1488.72 | 0    | 0 | 73  | 2.80E-06 | 1 | K.VFMLHMENTGLR.E                  | 0.84 | F&H (2D-GIST) |
| gij84914    | FBgn000313 | 590.33  | 1178.64 | 1178.64 | 0    | 0 | 73  | 2.10E-06 | 1 | K.LAVLDLSHNR.D                    | 0.98 | F&H (2D-GIST) |
| gij17864142 | FBgn000313 | 746.88  | 1491.75 | 1491.74 | 0.01 | 0 | 70  | 6.20E-06 | 1 | K.VFMLHMENTGLR.E                  | 0.78 | R&H (2D-GIST) |
| gij17864142 | FBgn000313 | 859.43  | 1716.84 | 1716.83 | 0.01 | 0 | 51  | 0.00033  | 1 | K.MSHGYSGSALPAEPLR.H              | 0.86 | R&H (2D-GIST) |
| gij17864142 | FBgn000313 | 591.84  | 1181.66 | 1181.66 | 0.01 | 0 | 76  | 1.20E-06 | 1 | K.LAVLDLSHNR.D                    | 0.96 | R&H (2D-GIST) |
| gij17864142 | FBgn000313 | 731.88  | 1461.75 | 1461.74 | 0    | 0 | 59  | 7.20E-05 | 1 | R.TFFDGNPIHTLR.E                  | 0.98 | R&H (2D-GIST) |
| gij84914    | FBgn000313 | 1071.54 | 3211.59 | 3211.58 | 0.01 | 1 | 50  | 0.00054  | 1 | K.RLDFSENGISSIENDAFHEIGHSLISL.K.M | 0.95 | F&H (2D-GIST) |
| gij17864142 | FBgn000313 | 1071.54 | 3211.6  | 3211.58 | 0.02 | 1 | 56  | 0.00012  | 1 | K.RLDFSENGISSIENDAFHEIGHSLISL.K.M | 0.73 | R&L (2D-GIST) |
| gij84914    | FBgn000313 | 774.4   | 2320.17 | 2320.17 | 0.01 | 0 | 37  | 0.013    | 1 | R.FNHLTSISQHTFFDLEALR.K           | 1.24 | F&H (2D-GIST) |
| gij17864142 | FBgn000313 | 688     | 2060.98 | 2060.98 | 0    | 0 | 42  | 0.0031   | 1 | R.LHYFEYGCLDSLPHLR.S              | 0.92 | F&H (2D-GIST) |
| gij84914    | FBgn000313 | 1031.5  | 2060.98 | 2060.98 | 0    | 0 | 73  | 2.90E-06 | 1 | R.LHYFEYGCLDSLPHLR.S              | 1.18 | F&H (2D-GIST) |
| gij84914    | FBgn000313 | 689.01  | 2064    | 2064    | 0.01 | 0 | 52  | 0.00034  | 1 | R.LHYFEYGCLDSLPHLR.S              | 0.93 | R&H (2D-GIST) |
| gij84914    | FBgn000313 | 832.11  | 2493.3  | 2493.29 | 0.01 | 1 | 44  | 0.0021   | 1 | R.FNHLTSISQHTFFDLEALR.K.L         | 0.98 | R&H (2D-GIST) |
| gij84914    | FBgn000313 | 773.39  | 2317.16 | 2317.15 | 0.01 | 0 | 46  | 0.0013   | 1 | R.FNHLTSISQHTFFDLEALR.K           | 0.73 | R&L (2D-GIST) |
| gij84914    | FBgn000313 | 427.22  | 1278.65 | 1278.65 | 0    | 0 | 33  | 0.029    | 1 | R.IVDFSHNHLR.G                    | 0.81 | R&L (2D-GIST) |
| gij84914    | FBgn000313 | 640.33  | 1278.65 | 1278.65 | 0    | 0 | 52  | 0.00038  | 1 | R.IVDFSHNHLR.G                    | 0.85 | R&L (2D-GIST) |
| gij84914    | FBgn000313 | 1031.5  | 2060.99 | 2060.98 | 0.01 | 0 | 76  | 1.30E-06 | 1 | R.LHYFEYGCLDSLPHLR.S              | 0.87 | R&L (2D-GIST) |
| gij84914    | FBgn000313 | 1071.54 | 3211.59 | 3211.58 | 0.02 | 1 | 58  | 8.50E-05 | 1 | K.RLDFSENGISSIENDAFHEIGHSLISL.K.M | 0.94 | R&L (2D-GIST) |
| gij84914    | FBgn000313 | 750.04  | 2247.1  | 2247.1  | 0    | 0 | 38  | 0.0081   | 1 | R.HLDLGYNHITHIQHDSFR.G            | 0.70 | R&H (2D-GIST) |
| gij84914    | FBgn000313 | 774.4   | 2320.17 | 2320.17 | 0    | 0 | 42  | 0.0037   | 1 | R.FNHLTSISQHTFFDLEALR.K           | 1.01 | R&H (2D-GIST) |
| gij4555333  | FBgn000319 | 908.94  | 1815.86 | 1815.86 | 0    | 0 | 87  | 1.10E-07 | 1 | R.VHEGCVEPATHNALAK.I              | 0.90 | F&H (2D-GIST) |
| gij4555333  | FBgn000319 | 715.87  | 1429.73 | 1429.72 | 0.01 | 0 | 68  | 1.10E-05 | 1 | K.IILDSSVFSHDR.N                  | 0.92 | F&H (2D-GIST) |
| gij4555333  | FBgn000319 | 1185.64 | 2369.26 | 2369.24 | 0.02 | 0 | 63  | 2.80E-05 | 1 | R.ISADTIFVTAPHEASGGIIVNR.K        | 0.72 | R&H (2D-GIST) |
| gij4555333  | FBgn000319 | 911.96  | 1821.9  | 1821.89 | 0.01 | 0 | 53  | 0.00028  | 1 | R.VHEGCVEPATHNALAK.I              | 1.07 | R&H (2D-GIST) |
| gij4555333  | FBgn000319 | 803.9   | 1605.78 | 1605.78 | 0    | 0 | 63  | 2.20E-05 | 1 | R.HSSLNGCQIINYR.C                 | 1.24 | F&H (2D-GIST) |
| gij356770   | FBgn000409 | 675.91  | 1349.81 | 1349.8  | 0    | 1 | 30  | 0.028    | 1 | K.VGPNLHGLIGRK.T                  | 2.50 | F&H (2D-GIST) |



|             |             |         |         |         |       |   |     |          |   |                                          |             |               |
|-------------|-------------|---------|---------|---------|-------|---|-----|----------|---|------------------------------------------|-------------|---------------|
| gij356770   | FBgn0000409 | 587.84  | 1173.66 | 1173.66 | 0     | 0 | 79  | 5.50E-07 | 1 | K.VGPNLHGLIGR.K                          | 0.97        | F&H (2D-GIST) |
| gij356770   | FBgn0000409 | 587.84  | 1173.66 | 1173.66 | 0     | 0 | 77  | 9.20E-07 | 1 | K.VGPNLHGLIGR.K                          | 1.87        | R&L (2D-GIST) |
| gij356770   | FBgn0000409 | 587.84  | 1173.66 | 1173.66 | 0     | 0 | 71  | 3.30E-06 | 1 | K.VGPNLHGLIGR.K                          | 2.50        | R&L (2D-GIST) |
| gij24652838 | FBgn0000556 | 1002.56 | 2003.11 | 2003.09 | 0.02  | 0 | 76  | 6.40E-07 | 1 | K.TLIDALDAILPPARPTDK.A                   | 0.79        | F&H (2D-GIST) |
| gij24652838 | FBgn0000556 | 668.71  | 2003.11 | 2003.09 | 0.02  | 0 | 36  | 0.0067   | 1 | K.TLIDALDAILPPARPTDK.A                   | 0.82        | F&H (2D-GIST) |
| gij24652838 | FBgn0000556 | 1002.56 | 2003.11 | 2003.09 | 0.02  | 0 | 82  | 1.70E-07 | 1 | K.TLIDALDAILPPARPTDK.A                   | 0.95        | R&L (2D-GIST) |
| gij24652838 | FBgn0000556 | 668.71  | 2003.11 | 2003.09 | 0.02  | 0 | 37  | 0.0054   | 1 | K.TLIDALDAILPPARPTDK.A                   | 1.03        | R&L (2D-GIST) |
| gij24652838 | FBgn0000556 | 1317.32 | 3948.94 | 3948.95 | -0.01 | 0 | 89  | 3.90E-08 | 1 | K.GAADFTAQVIVLNHPGQIANGYTPVLDCHTAHIACK.F | 0.84        | F&H (2D-GIST) |
| gij84947    | FBgn0000559 | 569.31  | 1136.6  | 1136.59 | 0.01  | 0 | 50  | 0.00052  | 1 | M.VNFTVDEIR.G                            | 0.89        | R&H (2D-GIST) |
| gij84947    | FBgn0000559 | 696.34  | 1390.67 | 1390.67 | 0     | 0 | 55  | 0.00017  | 1 | R.NMSVIAHVVDHGK.S                        | 0.61        | F&H (2D-GIST) |
| gij84947    | FBgn0000559 | 691.86  | 1381.7  | 1381.7  | 0     | 0 | 60  | 5.70E-05 | 1 | K.DLVFITHPDQR.E                          | 0.84        | F&H (2D-GIST) |
| gij84947    | FBgn0000559 | 693.37  | 1384.73 | 1384.72 | 0.01  | 0 | 44  | 0.0022   | 1 | K.DLVFITHPDQR.E                          | 0.95        | R&H (2D-GIST) |
| gij84947    | FBgn0000559 | 699.36  | 1396.71 | 1396.7  | 0     | 0 | 63  | 2.70E-05 | 1 | R.NMSVIAHVVDHGK.S                        | 1.11        | R&H (2D-GIST) |
| gij84947    | FBgn0000559 | 691.86  | 1381.7  | 1381.7  | 0     | 0 | 53  | 0.0003   | 1 | K.DLVFITHPDQR.E                          | 0.81        | F&H (2D-GIST) |
| gij84947    | FBgn0000559 | 693.37  | 1384.72 | 1384.72 | 0     | 0 | 59  | 7.40E-05 | 1 | K.DLVFITHPDQR.E                          | 0.99        | R&H (2D-GIST) |
| gij84947    | FBgn0000559 | 699.36  | 1396.71 | 1396.7  | 0     | 0 | 65  | 1.60E-05 | 1 | R.NMSVIAHVVDHGK.S                        | 1.05        | R&H (2D-GIST) |
| gij21392248 | FBgn0000579 | 674.39  | 1346.77 | 1346.76 | 0.01  | 0 | 84  | 2.50E-07 | 1 | K.EALNLISDAIAK.A                         | 0.93        | F&H (2D-GIST) |
| gij21392248 | FBgn0000579 | 975.04  | 1948.07 | 1948.06 | 0.01  | 0 | 61  | 2.50E-05 | 1 | K.VNIGITVTESIAAHLAK.K                    | 0.95        | F&H (2D-GIST) |
| gij21392248 | FBgn0000579 | 903.97  | 1805.93 | 1805.93 | 0.01  | 0 | 99  | 7.90E-09 | 1 | R.AAVPSGASTGVHEALELR.D                   | 1.07        | F&H (2D-GIST) |
| gij21392248 | FBgn0000579 | 671.37  | 1340.73 | 1340.72 | 0.01  | 0 | 85  | 2.30E-07 | 1 | K.EALNLISDAIAK.A                         | 1.15        | R&L (2D-GIST) |
| gij21392248 | FBgn0000579 | 823.95  | 1645.88 | 1645.87 | 0.01  | 0 | 47  | 0.0016   | 1 | K.AVGHVNDTLGPELIK.A                      | 1.24        | R&L (2D-GIST) |
| gij21392248 | FBgn0000579 | 975.05  | 1948.08 | 1948.06 | 0.02  | 0 | 70  | 2.90E-06 | 1 | K.VNIGITVTESIAAHLAK.K                    | 1.30        | R&L (2D-GIST) |
| gij119351   | FBgn0000579 | 903.97  | 1805.92 | 1805.93 | 0     | 0 | 112 | 4.60E-10 | 1 | R.AAVPSGASTGVHEALELR.D                   | 0.98        | F&H (2D-GIST) |
| gij119351   | FBgn0000579 | 905.48  | 1808.95 | 1808.95 | 0     | 0 | 107 | 1.20E-09 | 1 | R.AAVPSGASTGVHEALELR.D                   | 1.01        | R&H (2D-GIST) |
| gij21392248 | FBgn0000579 | 642.81  | 1283.6  | 1283.6  | 0     | 0 | 66  | 7.70E-06 | 1 | K.MGSEVYHHLK.N                           | 0.87        | F&H (2D-GIST) |
| gij21392248 | FBgn0000579 | 678.83  | 1355.64 | 1355.64 | 0     | 1 | 28  | 0.054    | 1 | K.KNGWGTMVSHR.S                          | 1.21        | F&H (2D-GIST) |
| gij119351   | FBgn0000579 | 642.81  | 1283.6  | 1283.6  | 0     | 0 | 61  | 2.10E-05 | 1 | K.MGSEVYHHLK.N                           | 1.36        | R&L (2D-GIST) |
| gij103175   | FBgn0000639 | 903.48  | 2707.4  | 2707.4  | 0.01  | 0 | 49  | 0.00084  | 1 | R.LNQESIAQQQLIEEQQLINNPR.L               | 3.45        | R&H (2D-GIST) |
| gij24664085 | FBgn0000639 | 794.4   | 1586.79 | 1586.78 | 0.01  | 0 | 33  | 0.034    | 1 | R.AMNPVMSILMPWRE                         | singleton L | R&L (2D-GIST) |
| gij24664085 | FBgn0000639 | 1033.07 | 2064.14 | 2064.13 | 0     | 0 | 62  | 1.90E-05 | 1 | R.IQEVIGQVLNQVNVNSLR.G                   | singleton L | R&L (2D-GIST) |
| gij103175   | FBgn0000639 | 583.35  | 1164.69 | 1164.68 | 0     | 0 | 56  | 0.00011  | 1 | R.FPQHLLLP.R.G                           | 3.35        | F&H (2D-GIST) |
| gij103175   | FBgn0000639 | 619.87  | 1237.72 | 1237.72 | 0     | 0 | 60  | 3.90E-05 | 1 | R.LSEIVLHNL.R.Q                          | 3.37        | F&H (2D-GIST) |
| gij24664085 | FBgn0000639 | 628.83  | 1255.64 | 1255.64 | 0     | 0 | 36  | 0.012    | 1 | K.VMHNVIDLDR.Q                           | 36.74       | F&H (2D-GIST) |
| gij103175   | FBgn0000639 | 581.84  | 1161.67 | 1161.67 | 0     | 0 | 42  | 0.0014   | 1 | R.FPQHLLLP.R.G                           | 4.23        | R&L (2D-GIST) |
| gij103175   | FBgn0000639 | 618.36  | 1234.71 | 1234.7  | 0     | 0 | 60  | 2.50E-05 | 1 | R.LSEIVLHNL.R.Q                          | 5.03        | R&L (2D-GIST) |
| gij24664085 | FBgn0000639 | 627.32  | 1252.62 | 1252.62 | 0     | 0 | 35  | 0.016    | 1 | K.VMHNVIDLDR.Q                           | singleton L | R&L (2D-GIST) |
| gij24664085 | FBgn0000639 | 839.93  | 1677.85 | 1677.84 | 0     | 0 | 54  | 0.00029  | 1 | R.IGGAHNLPVSVNSDR.L                      | singleton L | R&L (2D-GIST) |
| gij103175   | FBgn0000639 | 1102.58 | 3304.73 | 3304.71 | 0.02  | 1 | 118 | 5.70E-11 | 1 | R.TRIEEHELDLSNLVEQQVQGIQEIIVGR.Q         | 3.83        | F&H (2D-GIST) |
| gij103175   | FBgn0000639 | 618.36  | 1234.71 | 1234.7  | 0     | 0 | 63  | 1.20E-05 | 1 | R.LSEIVLHNL.R.Q                          | singleton L | R&L (2D-GIST) |

|             |             |         |         |         |       |   |     |          |   |                                 |             |               |
|-------------|-------------|---------|---------|---------|-------|---|-----|----------|---|---------------------------------|-------------|---------------|
| gij24664085 | FBgn0000639 | 760.99  | 2279.94 | 2279.94 | 0.01  | 0 | 73  | 1.70E-07 | 1 | K.HQNDDDDDDVNDVVNVVHR.Q         | 44.29       | F&H (2D-GIST) |
| gij103175   | FBgn0000639 | 1101.58 | 3301.7  | 3301.69 | 0.01  | 1 | 131 | 2.50E-12 | 1 | R.TRIEEHLDLSNLVEQQVQGIQVEIVGR.Q | 4.55        | R&L (2D-GIST) |
| gij24664085 | FBgn0000639 | 780.04  | 2337.11 | 2337.1  | 0.01  | 1 | 63  | 2.30E-05 | 1 | R.RLNQDNQDIQQQMHPFR.R           | singleton L | R&L (2D-GIST) |
| gij8186     | FBgn0000667 | 630.86  | 1259.7  | 1259.7  | 0     | 0 | 29  | 0.072    | 1 | R.LASDLLEWIR.R                  | 0.55        | F&H (2D-GIST) |
| gij8186     | FBgn0000667 | 746.85  | 1491.69 | 1491.68 | 0.01  | 0 | 65  | 1.00E-05 | 1 | K.AGTAIDNIEEDFR.N               | 0.68        | F&H (2D-GIST) |
| gij8186     | FBgn0000667 | 630.86  | 1259.7  | 1259.7  | 0     | 0 | 37  | 0.014    | 1 | R.LASDLLEWIR.R                  | 1.02        | R&H (2D-GIST) |
| gij8186     | FBgn0000667 | 600.34  | 1198.66 | 1198.65 | 0.01  | 0 | 30  | 0.056    | 1 | K.ANIVGPWIER.Q                  | 1.04        | R&H (2D-GIST) |
| gij8186     | FBgn0000667 | 746.85  | 1491.69 | 1491.68 | 0.01  | 0 | 61  | 2.60E-05 | 1 | K.AGTAIDNIEEDFR.N               | 0.87        | R&L (2D-GIST) |
| gij8186     | FBgn0000667 | 872.44  | 1742.86 | 1742.84 | 0.02  | 0 | 81  | 4.50E-07 | 1 | K.IHQAVQESMIFENR.Y              | 0.81        | F&H (2D-GIST) |
| gij13124689 | FBgn0000667 | 1444.74 | 2887.46 | 2887.42 | 0.04  | 0 | 53  | 0.00027  | 1 | R.VEQIAAIAQELNTLEYHDCVSVNAR.C   | 1.52        | R&H (2D-GIST) |
| gij13124689 | FBgn0000667 | 962.48  | 2884.41 | 2884.4  | 0.01  | 0 | 73  | 2.40E-06 | 1 | R.VEQIAAIAQELNTLEYHDCVSVNAR.C   | 0.73        | R&L (2D-GIST) |
| gij8186     | FBgn0000667 | 659.36  | 1316.7  | 1316.7  | 0     | 0 | 49  | 0.00085  | 1 | R.HRPDLIDYAK.L                  | 1.02        | F&H (2D-GIST) |
| gij13124689 | FBgn0000667 | 872.43  | 1742.85 | 1742.84 | 0     | 0 | 83  | 3.00E-07 | 1 | K.IHQAVQESMIFENR.Y              | 0.90        | R&L (2D-GIST) |
| gij13124689 | FBgn0000667 | 656.34  | 1310.67 | 1310.66 | 0     | 0 | 48  | 0.00077  | 1 | R.HRPDLIDYAK.L                  | 0.94        | R&L (2D-GIST) |
| gij13124689 | FBgn0000667 | 657.84  | 1313.66 | 1313.65 | 0.01  | 0 | 37  | 0.013    | 1 | K.DGLAFCALIHR.H                 | 1.61        | R&L (2D-GIST) |
| gij1070611  | FBgn0000667 | 673.01  | 2016    | 2016    | 0     | 2 | 58  | 9.50E-05 | 1 | K.KKHEAFESDLAAHQDR.V            | 0.83        | F&H (2D-GIST) |
| gij1070611  | FBgn0000667 | 556.59  | 1666.74 | 1666.73 | 0     | 0 | 65  | 5.80E-06 | 1 | K.HEAFESDLAAHQDR.V              | 0.74        | F&H (2D-GIST) |
| gij13124689 | FBgn0000667 | 919.42  | 1836.83 | 1836.84 | 0     | 1 | 66  | 7.20E-06 | 1 | K.KHEAFESDLAAHQDR.V             | 0.99        | F&H (2D-GIST) |
| gij13124689 | FBgn0000667 | 615.3   | 1842.88 | 1842.88 | 0     | 1 | 43  | 0.0021   | 1 | K.KHEAFESDLAAHQDR.V             | 0.88        | R&H (2D-GIST) |
| gij1346761  | FBgn0000711 | 855.4   | 1708.79 | 1708.78 | 0     | 0 | 49  | 0.00044  | 1 | R.AHQVVEDGYEFFAR.R              | 0.60        | F&H (2D-GIST) |
| gij1346761  | FBgn0000711 | 951.97  | 1901.93 | 1901.91 | 0.02  | 0 | 30  | 0.05     | 1 | K.YLYSGMNSSRPTTPQR.S            | 1.23        | R&H (2D-GIST) |
| gij1346761  | FBgn0000711 | 855.41  | 1708.8  | 1708.78 | 0.02  | 0 | 48  | 0.00064  | 1 | R.AHQVVEDGYEFFAR.R              | 0.87        | R&L (2D-GIST) |
| gij1854503  | FBgn0001098 | 896.49  | 1790.96 | 1790.95 | 0.01  | 0 | 103 | 3.70E-09 | 1 | K.TFIVQGGFNGVGLHTTR.Y           | 1.00        | F&H (2D-GIST) |
| gij1854503  | FBgn0001098 | 959.99  | 1917.97 | 1917.96 | 0     | 0 | 62  | 3.90E-05 | 1 | R.ESNYHLLASVQQSIER.I            | 1.49        | F&H (2D-GIST) |
| gij542577   | FBgn0001098 | 789.37  | 1576.72 | 1576.72 | 0     | 0 | 44  | 0.0012   | 1 | K.DIVHSGLDYTMER.S               | 0.77        | F&H (2D-GIST) |
| gij542577   | FBgn0001098 | 987.97  | 1973.92 | 1973.93 | -0.01 | 0 | 76  | 1.00E-06 | 1 | R.ESNYHLLSVQESLER.R             | 1.30        | F&H (2D-GIST) |
| gij542577   | FBgn0001098 | 989.49  | 1976.97 | 1976.95 | 0.02  | 0 | 78  | 7.70E-07 | 1 | R.ESNYHLLSVQESLER.R             | 0.98        | R&H (2D-GIST) |
| gij542577   | FBgn0001098 | 790.88  | 1579.74 | 1579.74 | 0.01  | 0 | 55  | 0.0001   | 1 | K.DIVHSGLDYTMER.S               | 1.11        | R&H (2D-GIST) |
| gij45549226 | FBgn0001098 | 894.98  | 1787.95 | 1787.93 | 0.02  | 0 | 93  | 2.80E-08 | 1 | K.TFIVQGGFNGVGLHTTR.Y           | 0.87        | F&H (2D-GIST) |
| gij1854503  | FBgn0001098 | 894.98  | 1787.94 | 1787.93 | 0.01  | 0 | 103 | 3.20E-09 | 1 | K.TFIVQGGFNGVGLHTTR.Y           | 0.97        | R&L (2D-GIST) |
| gij542577   | FBgn0001098 | 987.98  | 1973.94 | 1973.93 | 0.01  | 0 | 76  | 1.40E-06 | 1 | R.ESNYHLLSVQESLER.R             | 1.12        | R&L (2D-GIST) |
| gij1854503  | FBgn0001098 | 958.48  | 1914.95 | 1914.94 | 0.01  | 0 | 83  | 2.80E-07 | 1 | R.ESNYHLLASVQQSIER.I            | 1.40        | R&L (2D-GIST) |
| gij45555444 | FBgn0001105 | 702.38  | 1402.75 | 1402.74 | 0.01  | 0 | 39  | 0.011    | 1 | K.LIVWDSHTTNK.V                 | 1.39        | F&H (2D-GIST) |
| gij45555444 | FBgn0001105 | 702.38  | 1402.74 | 1402.74 | 0.01  | 0 | 40  | 0.007    | 1 | K.LIVWDSHTTNK.V                 | 1.28        | R&H (2D-GIST) |
| gij45555444 | FBgn0001105 | 774.34  | 1546.67 | 1546.67 | 0     | 0 | 47  | 0.00031  | 1 | R.ELPGHGGYLSCCR.F               | 0.88        | F&H (2D-GIST) |
| gij45555444 | FBgn0001105 | 696.31  | 1390.61 | 1390.61 | 0     | 0 | 34  | 0.0073   | 1 | K.IYAMHWGNDSR.N                 | 0.99        | F&H (2D-GIST) |
| gij45555444 | FBgn0001105 | 696.31  | 1390.61 | 1390.61 | 0     | 0 | 30  | 0.021    | 1 | K.IYAMHWGNDSR.N                 | 1.42        | R&L (2D-GIST) |
| gij45555444 | FBgn0001105 | 696.31  | 1390.61 | 1390.61 | 0     | 0 | 47  | 0.0004   | 1 | K.IYAMHWGNDSR.N                 | 1.44        | R&L (2D-GIST) |
| gij2146901  | FBgn0001114 | 1053.49 | 2104.96 | 2104.94 | 0.02  | 1 | 35  | 0.0076   | 1 | R.NFSEEDREQQQEQQLR.R            | 0.62        | F&H (2D-GIST) |

|             |             |         |         |         |      |   |     |          |   |                                     |      |               |
|-------------|-------------|---------|---------|---------|------|---|-----|----------|---|-------------------------------------|------|---------------|
| gij2146901  | FBgn0001114 | 1341.56 | 2681.11 | 2681.1  | 0.01 | 1 | 42  | 0.00016  | 1 | R.DQVEQEREQPEDDQGEYER.L             | 0.83 | R&H (2D-GIST) |
| gij2146901  | FBgn0001114 | 893.71  | 2678.09 | 2678.09 | 0.01 | 1 | 28  | 0.005    | 1 | R.DQVEQEREQPEDDQGEYER.L             | 0.63 | R&L (2D-GIST) |
| gij2146901  | FBgn0001114 | 792.46  | 1582.9  | 1582.89 | 0    | 0 | 45  | 0.0014   | 1 | K.TIANRPVNAFLGIR.Y                  | 0.78 | F&H (2D-GIST) |
| gij2146901  | FBgn0001114 | 1029.49 | 2056.96 | 2056.95 | 0.01 | 2 | 94  | 1.60E-08 | 1 | K.LREEQEEQEKLEER.Y                  | 0.87 | R&L (2D-GIST) |
| gij2146901  | FBgn0001114 | 792.46  | 1582.9  | 1582.89 | 0.01 | 0 | 50  | 0.00036  | 1 | K.TIANRPVNAFLGIR.Y                  | 1.12 | R&L (2D-GIST) |
| gij17861668 | FBgn0001125 | 885.92  | 1769.82 | 1769.8  | 0.02 | 0 | 46  | 0.0006   | 1 | R.AGFTVLCSDEEEAAR.V                 | 0.96 | R&H (2D-GIST) |
| gij17861668 | FBgn0001125 | 777.41  | 1552.8  | 1552.8  | 0    | 0 | 74  | 2.50E-06 | 1 | K.HNVTAQSIGTGALR.I                  | 0.86 | F&H (2D-GIST) |
| gij17861668 | FBgn0001125 | 777.41  | 1552.8  | 1552.8  | 0    | 0 | 66  | 1.60E-05 | 1 | K.HNVTAQSIGTGALR.I                  | 1.29 | R&L (2D-GIST) |
| gij17861668 | FBgn0001125 | 886.12  | 2655.34 | 2655.32 | 0.01 | 0 | 51  | 0.00048  | 1 | K.SIVLLHACAHNPTGVDPTLEQWR.E         | 0.64 | F&H (2D-GIST) |
| gij24580972 | FBgn0001125 | 886.12  | 2655.33 | 2655.32 | 0.01 | 0 | 58  | 9.70E-05 | 1 | K.SIVLLHACAHNPTGVDPTLEQWR.E         | 0.97 | R&L (2D-GIST) |
| gij103185   | FBgn0001128 | 902.01  | 1802    | 1801.98 | 0.02 | 1 | 58  | 8.00E-05 | 1 | K.KLTEIINETHENVK.Y                  | 0.87 | R&H (2D-GIST) |
| gij103185   | FBgn0001128 | 876     | 1749.99 | 1749.97 | 0.02 | 1 | 31  | 0.028    | 1 | K.GLEDKFPFLTAIHK.I                  | 1.05 | R&H (2D-GIST) |
| gij103185   | FBgn0001128 | 798.94  | 1595.87 | 1595.87 | 0    | 0 | 88  | 9.10E-08 | 1 | K.AEGGGIDLISHIITR.H                 | 0.79 | F&H (2D-GIST) |
| gij103185   | FBgn0001128 | 798.95  | 1595.88 | 1595.87 | 0    | 0 | 85  | 1.50E-07 | 1 | K.AEGGGIDLISHIITR.H                 | 0.89 | R&H (2D-GIST) |
| gij217336   | FBgn0001128 | 596.8   | 1191.59 | 1191.59 | 0    | 0 | 51  | 0.00032  | 1 | R.DLFQANHFR.V                       | 0.82 | F&H (2D-GIST) |
| gij103185   | FBgn0001128 | 797.44  | 1592.86 | 1592.85 | 0.01 | 0 | 83  | 2.80E-07 | 1 | K.AEGGGIDLISHIITR.H                 | 0.86 | R&L (2D-GIST) |
| gij217336   | FBgn0001128 | 596.8   | 1191.59 | 1191.59 | 0    | 0 | 55  | 0.00015  | 1 | R.DLFQANHFR.V                       | 1.06 | R&H (2D-GIST) |
| gij24641292 | FBgn0001145 | 875.42  | 1748.82 | 1748.82 | 0    | 0 | 111 | 1.90E-10 | 1 | K.HETSSINDFSAGVANR.G                | 0.89 | F&H (2D-GIST) |
| gij24641292 | FBgn0001145 | 1004.51 | 2007    | 2006.99 | 0.01 | 0 | 44  | 0.0022   | 1 | R.RPSSNCDPYSVVEAILR.T               | 1.02 | F&H (2D-GIST) |
| gij16768060 | FBgn0001145 | 669     | 2003.98 | 2003.97 | 0.01 | 0 | 52  | 0.0004   | 1 | R.RPSSNCDPYSVVEAILR.T               | 0.84 | F&H (2D-GIST) |
| gij16768060 | FBgn0001145 | 582.94  | 1745.8  | 1745.8  | 0    | 0 | 36  | 0.0082   | 1 | K.HETSSINDFSAGVANR.G                | 0.93 | F&H (2D-GIST) |
| gij24641292 | FBgn0001145 | 1004.51 | 2007.01 | 2006.99 | 0.01 | 0 | 40  | 0.0058   | 1 | R.RPSSNCDPYSVVEAILR.T               | 0.91 | R&H (2D-GIST) |
| gij24641292 | FBgn0001145 | 875.42  | 1748.82 | 1748.82 | 0.01 | 0 | 95  | 9.00E-09 | 1 | K.HETSSINDFSAGVANR.G                | 0.94 | R&H (2D-GIST) |
| gij68585    | FBgn0001145 | 583.95  | 1748.82 | 1748.82 | 0    | 0 | 37  | 0.0048   | 1 | K.HETSSINDFSAGVANR.G                | 1.07 | R&H (2D-GIST) |
| gij68585    | FBgn0001145 | 875.42  | 1748.82 | 1748.82 | 0    | 0 | 98  | 4.10E-09 | 1 | K.HETSSINDFSAGVANR.G                | 1.00 | R&H (2D-GIST) |
| gij24641292 | FBgn0001145 | 670.01  | 2007.01 | 2006.99 | 0.02 | 0 | 51  | 0.00052  | 1 | R.RPSSNCDPYSVVEAILR.T               | 1.14 | R&H (2D-GIST) |
| gij24641292 | FBgn0001145 | 1003    | 2003.99 | 2003.97 | 0.01 | 0 | 51  | 0.00054  | 1 | R.RPSSNCDPYSVVEAILR.T               | 0.87 | R&L (2D-GIST) |
| gij24641292 | FBgn0001145 | 515.75  | 1029.49 | 1029.49 | 0    | 0 | 35  | 0.014    | 1 | R.DIVDAHFR.A                        | 0.87 | R&L (2D-GIST) |
| gij68585    | FBgn0001145 | 582.94  | 1745.8  | 1745.8  | 0    | 0 | 34  | 0.013    | 1 | K.HETSSINDFSAGVANR.G                | 1.13 | R&L (2D-GIST) |
| gij103300   | FBgn0001208 | 675.66  | 2023.97 | 2023.97 | 0    | 0 | 31  | 0.034    | 1 | R.EYNHVFPLLDVNCGFR.E                | 0.63 | F&H (2D-GIST) |
| gij1483314  | FBgn0001208 | 1011.48 | 2020.95 | 2020.95 | 0.01 | 0 | 62  | 2.40E-05 | 1 | R.EYNHVFPLLDVNCGFR.E                | 1.05 | F&H (2D-GIST) |
| gij103300   | FBgn0001208 | 1013    | 2023.98 | 2023.97 | 0.01 | 0 | 39  | 0.0063   | 1 | R.EYNHVFPLLDVNCGFR.E                | 0.89 | R&H (2D-GIST) |
| gij103300   | FBgn0001208 | 1013    | 2023.98 | 2023.97 | 0.01 | 0 | 68  | 7.50E-06 | 1 | R.EYNHVFPLLDVNCGFR.E                | 0.80 | R&H (2D-GIST) |
| gij103300   | FBgn0001208 | 1265.62 | 3793.83 | 3793.82 | 0.01 | 1 | 32  | 0.018    | 1 | R.EYNHVFPLLDVNCGFREDNIPQLEDVSNFLR.D | 1.29 | F&H (2D-GIST) |
| gij1483314  | FBgn0001208 | 517.62  | 1549.85 | 1549.85 | 0    | 1 | 48  | 0.0011   | 1 | K.KHDINLVHIESR.S                    | 0.84 | F&H (2D-GIST) |
| gij1483314  | FBgn0001208 | 687.86  | 1373.7  | 1373.71 | 0    | 0 | 77  | 1.60E-06 | 1 | K.HDINLVHIESR.S                     | 0.89 | F&H (2D-GIST) |
| gij1483314  | FBgn0001208 | 458.91  | 1373.71 | 1373.71 | 0    | 0 | 55  | 0.00024  | 1 | K.HDINLVHIESR.S                     | 0.90 | F&H (2D-GIST) |
| gij1483314  | FBgn0001208 | 772.91  | 1543.81 | 1543.81 | 0    | 1 | 40  | 0.0075   | 1 | K.KHDINLVHIESR.S                    | 0.92 | F&H (2D-GIST) |
| gij1483314  | FBgn0001208 | 775.93  | 1549.85 | 1549.85 | 0    | 1 | 57  | 0.00013  | 1 | K.KHDINLVHIESR.S                    | 1.13 | R&H (2D-GIST) |

|             |             |         |         |         |       |   |     |          |   |                                 |      |               |
|-------------|-------------|---------|---------|---------|-------|---|-----|----------|---|---------------------------------|------|---------------|
| gil283667   | FBgn0001215 | 881.97  | 1761.93 | 1761.93 | 0     | 0 | 30  | 0.067    | 1 | K.VFLGGLPSNVTTETDLR.T           | 0.96 | R&H (2D-GIST) |
| gil283667   | FBgn0001215 | 1173.05 | 2344.09 | 2344.07 | 0.03  | 0 | 103 | 1.30E-09 | 1 | R.GFGFLSFEEESSVEHVTNER.Y        | 1.14 | F&H (2D-GIST) |
| gil133253   | FBgn0001215 | 967.01  | 1932.01 | 1931.99 | 0.02  | 1 | 62  | 3.80E-05 | 1 | K.LFVGALKDDHDEQSR.D             | 1.02 | R&H (2D-GIST) |
| gil283667   | FBgn0001215 | 985.82  | 2954.45 | 2954.45 | 0     | 0 | 42  | 0.0027   | 1 | R.GFGFVTFADPTNVNHLVQNGPHTLDGR.T | 0.95 | F&H (2D-GIST) |
| gil283667   | FBgn0001215 | 985.82  | 2954.44 | 2954.45 | -0.01 | 0 | 40  | 0.0036   | 1 | R.GFGFVTFADPTNVNHLVQNGPHTLDGR.T | 0.92 | R&H (2D-GIST) |
| gil266310   | FBgn0001218 | 645.01  | 1932.01 | 1931.99 | 0.01  | 0 | 38  | 0.0094   | 1 | K.VTHAVVTVPAYFNDAQR.Q           | 0.88 | F&H (2D-GIST) |
| gil266310   | FBgn0001218 | 1053.57 | 2105.14 | 2105.12 | 0.02  | 1 | 61  | 4.10E-05 | 1 | K.KVTHAVVTVPAYFNDAQR.Q          | 0.92 | F&H (2D-GIST) |
| gil266310   | FBgn0001218 | 787.91  | 1573.81 | 1573.81 | 0.01  | 0 | 64  | 2.70E-05 | 1 | K.VFAPEEISAMVLGK.M              | 1.03 | F&H (2D-GIST) |
| gil266310   | FBgn0001218 | 635.82  | 1269.63 | 1269.63 | 0     | 0 | 35  | 0.02     | 1 | R.VEIIANDQGNR.I                 | 1.09 | F&H (2D-GIST) |
| gil266310   | FBgn0001218 | 965.5   | 1928.99 | 1928.97 | 0.01  | 0 | 46  | 0.0017   | 1 | K.VTHAVVTVPAYFNDAQR.Q           | 1.24 | F&H (2D-GIST) |
| gil266310   | FBgn0001218 | 786.4   | 1570.78 | 1570.77 | 0.01  | 0 | 33  | 0.025    | 1 | R.ITPSYVAFTADGER.L              | 1.49 | R&H (2D-GIST) |
| gil24641408 | FBgn0001218 | 787.91  | 1573.81 | 1573.81 | 0.01  | 0 | 53  | 0.00036  | 1 | K.VFAPEEISAMVLGK.M              | 2.02 | R&L (2D-GIST) |
| gil266310   | FBgn0001218 | 712.38  | 1422.75 | 1422.75 | 0     | 0 | 72  | 3.60E-06 | 1 | K.DVHEIVLVGGSTR.I               | 1.16 | F&H (2D-GIST) |
| gil266310   | FBgn0001218 | 967.01  | 1932    | 1931.99 | 0.01  | 0 | 39  | 0.0079   | 1 | K.VTHAVVTVPAYFNDAQR.Q           | 0.91 | R&H (2D-GIST) |
| gil266310   | FBgn0001218 | 713.89  | 1425.77 | 1425.77 | 0.01  | 0 | 49  | 0.00066  | 1 | K.DVHEIVLVGGSTR.I               | 1.18 | R&H (2D-GIST) |
| gil266310   | FBgn0001218 | 1053.57 | 2105.13 | 2105.12 | 0.01  | 1 | 55  | 0.00018  | 1 | K.KVTHAVVTVPAYFNDAQR.Q          | 1.21 | R&H (2D-GIST) |
| gil266310   | FBgn0001218 | 700.7   | 2099.09 | 2099.08 | 0.01  | 1 | 45  | 0.0022   | 1 | K.KVTHAVVTVPAYFNDAQR.Q          | 1.04 | R&L (2D-GIST) |
| gil266310   | FBgn0001218 | 644     | 1928.98 | 1928.97 | 0.01  | 0 | 47  | 0.0014   | 1 | K.VTHAVVTVPAYFNDAQR.Q           | 1.23 | R&L (2D-GIST) |
| gil103190   | FBgn0001219 | 703.01  | 2106.01 | 2105.99 | 0.02  | 1 | 35  | 0.011    | 1 | K.WLDANQLADKEEYHR.Q             | 0.93 | F&H (2D-GIST) |
| gil103190   | FBgn0001219 | 666.36  | 1330.7  | 1330.69 | 0.01  | 0 | 45  | 0.0023   | 1 | R.LVTHFVQEFK.R                  | 0.85 | F&H (2D-GIST) |
| gil103190   | FBgn0001219 | 1051    | 2099.98 | 2099.95 | 0.03  | 1 | 107 | 8.30E-10 | 1 | K.WLDANQLADKEEYHR.Q             | 0.89 | F&H (2D-GIST) |
| gil103190   | FBgn0001219 | 765.36  | 1528.71 | 1528.7  | 0     | 0 | 44  | 0.0013   | 1 | R.TTPSYVAFTDTER.L               | 1.08 | F&H (2D-GIST) |
| gil103190   | FBgn0001219 | 1019.52 | 2037.02 | 2037.02 | 0     | 0 | 43  | 0.0026   | 1 | K.TVTNAVITVPAYFNDSQR.Q          | 0.87 | R&L (2D-GIST) |
| gil103190   | FBgn0001219 | 666.36  | 1330.7  | 1330.69 | 0.01  | 0 | 44  | 0.0031   | 1 | R.LVTHFVQEFK.R                  | 1.39 | R&L (2D-GIST) |
| gil103190   | FBgn0001219 | 861.93  | 1721.85 | 1721.84 | 0.01  | 0 | 30  | 0.068    | 1 | K.HWPFEVVSADGKPK.I              | 1.44 | R&L (2D-GIST) |
| gil103190   | FBgn0001219 | 868.88  | 1735.75 | 1735.75 | 0     | 0 | 64  | 3.90E-06 | 1 | K.STAGDTHLGGEDFDNRL             | 0.97 | F&H (2D-GIST) |
| gil103190   | FBgn0001219 | 747.92  | 1493.83 | 1493.82 | 0.01  | 0 | 87  | 1.10E-07 | 1 | K.SVIHDIVLVGGSTR.I              | 0.84 | F&H (2D-GIST) |
| gil38047539 | FBgn0001219 | 703.01  | 2106    | 2105.99 | 0.01  | 1 | 29  | 0.048    | 1 | K.WLDANQLADKEEYHR.Q             | 1.03 | R&H (2D-GIST) |
| gil103190   | FBgn0001219 | 749.43  | 1496.84 | 1496.84 | 0     | 0 | 73  | 2.70E-06 | 1 | K.SVIHDIVLVGGSTR.I              | 1.08 | R&H (2D-GIST) |
| gil103190   | FBgn0001219 | 1054.01 | 2106.01 | 2105.99 | 0.02  | 1 | 94  | 1.70E-08 | 1 | K.WLDANQLADKEEYHR.Q             | 1.09 | R&H (2D-GIST) |
| gil103190   | FBgn0001219 | 868.88  | 1735.76 | 1735.75 | 0.01  | 0 | 46  | 0.00028  | 1 | K.STAGDTHLGGEDFDNRL             | 1.11 | R&H (2D-GIST) |
| gil103190   | FBgn0001219 | 747.42  | 1492.83 | 1492.83 | 0     | 1 | 32  | 0.04     | 1 | R.LVTHFVQEFK.R                  | 1.53 | F&H (2D-GIST) |
| gil103190   | FBgn0001219 | 508.26  | 1521.76 | 1521.76 | 0     | 1 | 44  | 0.002    | 1 | R.ARFEELNADLFR.S                | 0.70 | F&H (2D-GIST) |
| gil103190   | FBgn0001219 | 761.89  | 1521.76 | 1521.76 | 0     | 1 | 55  | 0.00018  | 1 | R.ARFEELNADLFR.S                | 0.89 | F&H (2D-GIST) |
| gil103190   | FBgn0001219 | 763.4   | 1524.78 | 1524.78 | 0     | 1 | 47  | 0.0011   | 1 | R.ARFEELNADLFR.S                | 0.99 | R&H (2D-GIST) |
| gil103190   | FBgn0001219 | 749.43  | 1496.84 | 1496.84 | 0.01  | 0 | 70  | 5.40E-06 | 1 | K.SVIHDIVLVGGSTR.I              | 1.11 | R&H (2D-GIST) |
| gil103190   | FBgn0001219 | 761.89  | 1521.76 | 1521.76 | 0     | 1 | 39  | 0.0064   | 1 | R.ARFEELNADLFR.S                | 1.07 | R&L (2D-GIST) |
| gil17737553 | FBgn0001224 | 864.5   | 1726.98 | 1726.97 | 0.01  | 0 | 54  | 0.0001   | 1 | R.IVQIQVGPAPHLNVK.E             | 1.08 | R&L (2D-GIST) |
| gil17737553 | FBgn0001224 | 883.92  | 1765.83 | 1765.82 | 0.01  | 0 | 98  | 6.10E-09 | 1 | K.VQDNSVLVEGNHEER.E             | 0.83 | F&H (2D-GIST) |

|             |             |         |         |         |      |   |     |          |   |                               |      |               |
|-------------|-------------|---------|---------|---------|------|---|-----|----------|---|-------------------------------|------|---------------|
| gij17737553 | FBgn0001224 | 885.43  | 1768.85 | 1768.84 | 0.01 | 0 | 62  | 2.30E-05 | 1 | K.VQDNSVLVEGNHEER.E           | 0.85 | R&H (2D-GIST) |
| gij171489   | FBgn0001224 | 567.77  | 1133.53 | 1133.52 | 0.01 | 0 | 34  | 0.0074   | 1 | R.EDDHGFITR.H                 | 0.99 | R&H (2D-GIST) |
| gij17647519 | FBgn0001225 | 765.38  | 1528.75 | 1528.74 | 0.01 | 0 | 31  | 0.052    | 1 | R.NDIHWPATAHVVGK.D            | 0.94 | F&H (2D-GIST) |
| gij17647519 | FBgn0001225 | 573.31  | 1716.9  | 1716.89 | 0.01 | 0 | 73  | 3.40E-06 | 1 | R.SPIYELGLGLHPHSR.Y           | 0.92 | F&H (2D-GIST) |
| gij17647519 | FBgn0001225 | 573.31  | 1716.9  | 1716.89 | 0    | 0 | 67  | 1.20E-05 | 1 | R.SPIYELGLGLHPHSR.Y           | 0.88 | R&L (2D-GIST) |
| gij171491   | FBgn0001226 | 684.43  | 1366.85 | 1366.85 | 0    | 1 | 37  | 0.0022   | 1 | R.RLLLPNTLGLGR.R              | 0.78 | F&H (2D-GIST) |
| gij17647521 | FBgn0001226 | 955.12  | 2862.33 | 2862.33 | 0    | 0 | 64  | 7.90E-06 | 1 | R.TDWGHLLLEDDFGFGVHAHDLFHPR.R | 0.44 | R&H (2D-GIST) |
| gij17647529 | FBgn0001233 | 910     | 1818    | 1817.97 | 0.02 | 0 | 63  | 2.70E-05 | 1 | K.QLEINPDHPIVETLR.Q           | 0.67 | F&H (2D-GIST) |
| gij17647529 | FBgn0001233 | 635.83  | 1269.66 | 1269.65 | 0    | 0 | 35  | 0.016    | 1 | K.HVYFITGESK.D                | 0.94 | F&H (2D-GIST) |
| gij17647529 | FBgn0001233 | 1088.97 | 2175.94 | 2175.92 | 0.02 | 0 | 125 | 3.50E-12 | 1 | R.FHTSASGDDFCSLADYVSR.M       | 0.94 | F&H (2D-GIST) |
| gij17647529 | FBgn0001233 | 632.82  | 1263.62 | 1263.61 | 0.01 | 0 | 33  | 0.026    | 1 | K.HVYFITGESK.D                | 0.87 | R&L (2D-GIST) |
| gij17647529 | FBgn0001233 | 739.87  | 1477.73 | 1477.72 | 0.01 | 1 | 47  | 0.0013   | 1 | R.RTPFDLFENQK.K               | 1.01 | R&L (2D-GIST) |
| gij17647529 | FBgn0001233 | 1090.49 | 2178.96 | 2178.94 | 0.03 | 0 | 88  | 1.80E-08 | 1 | R.FHTSASGDDFCSLADYVSR.M       | 1.15 | F&H (2D-GIST) |
| gij17647529 | FBgn0001233 | 1090.48 | 2178.94 | 2178.94 | 0.01 | 0 | 88  | 9.90E-09 | 1 | R.FHTSASGDDFCSLADYVSR.M       | 0.78 | R&H (2D-GIST) |
| gij17647529 | FBgn0001233 | 910     | 1817.98 | 1817.97 | 0.01 | 0 | 81  | 5.00E-07 | 1 | K.QLEINPDHPIVETLR.Q           | 0.80 | R&H (2D-GIST) |
| gij17647529 | FBgn0001233 | 996.56  | 1991.1  | 1991.1  | 0    | 1 | 63  | 1.90E-05 | 1 | K.KQLEINPDHPIVETLR.Q          | 0.92 | R&H (2D-GIST) |
| gij8102     | FBgn0001233 | 695.84  | 1389.67 | 1389.67 | 0    | 0 | 60  | 6.40E-05 | 1 | K.HFSVEGQLEFR.A               | 1.00 | F&H (2D-GIST) |
| gij17647529 | FBgn0001233 | 697.35  | 1392.69 | 1392.69 | 0.01 | 0 | 50  | 0.00062  | 1 | K.HFSVEGQLEFR.A               | 0.94 | R&H (2D-GIST) |
| gij24660868 | FBgn0001248 | 750.88  | 1499.74 | 1499.73 | 0.01 | 0 | 87  | 1.10E-07 | 1 | K.AGPVVDVLGDEMTR.I            | 1.16 | F&H (2D-GIST) |
| gij24660868 | FBgn0001248 | 778.98  | 1555.94 | 1555.94 | 0.01 | 0 | 30  | 0.016    | 1 | R.LVTGWQKPIVIGR.H             | 1.54 | R&H (2D-GIST) |
| gij24660868 | FBgn0001248 | 750.88  | 1499.74 | 1499.73 | 0.01 | 0 | 83  | 2.80E-07 | 1 | K.AGPVVDVLGDEMTR.I            | 1.41 | R&L (2D-GIST) |
| gij24660868 | FBgn0001248 | 693.86  | 1385.7  | 1385.7  | 0    | 0 | 99  | 6.20E-09 | 1 | K.TVEAEAAHGTVTR.H             | 0.79 | F&H (2D-GIST) |
| gij24660868 | FBgn0001248 | 868.41  | 1734.81 | 1734.8  | 0.01 | 1 | 70  | 3.90E-06 | 1 | K.KEYEAAGIWEHR.L              | 1.02 | F&H (2D-GIST) |
| gij24660868 | FBgn0001248 | 693.86  | 1385.7  | 1385.7  | 0    | 0 | 71  | 3.50E-06 | 1 | K.TVEAEAAHGTVTR.H             | 1.36 | R&H (2D-GIST) |
| gij24660868 | FBgn0001248 | 783.36  | 1564.7  | 1564.69 | 0    | 0 | 57  | 4.00E-05 | 1 | K.EYEAAGIWEHR.L               | 0.94 | F&H (2D-GIST) |
| gij24660868 | FBgn0001248 | 693.86  | 1385.7  | 1385.7  | 0    | 0 | 99  | 6.10E-09 | 1 | K.TVEAEAAHGTVTR.H             | 1.23 | R&H (2D-GIST) |
| gij24660868 | FBgn0001248 | 783.36  | 1564.7  | 1564.69 | 0    | 0 | 53  | 9.60E-05 | 1 | K.EYEAAGIWEHR.L               | 1.41 | R&L (2D-GIST) |
| gij24660868 | FBgn0001248 | 868.41  | 1734.81 | 1734.8  | 0.01 | 1 | 75  | 1.10E-06 | 1 | K.KEYEAAGIWEHR.L              | 1.43 | R&L (2D-GIST) |
| gij8896016  | FBgn0001263 | 710.85  | 1419.7  | 1419.69 | 0    | 0 | 29  | 0.07     | 1 | K.GIVPDSPAHLCCR.L             | 0.85 | F&H (2D-GIST) |
| gij8896016  | FBgn0001263 | 743.87  | 1485.73 | 1485.73 | 0    | 0 | 42  | 0.0042   | 1 | K.VHQLFHTTYEK.A               | 0.83 | F&H (2D-GIST) |
| gij8896016  | FBgn0001263 | 684.36  | 1366.7  | 1366.69 | 0.01 | 1 | 33  | 0.029    | 1 | R.IRTEAGYEIDR.A               | 0.81 | R&H (2D-GIST) |
| gij8896016  | FBgn0001263 | 712.37  | 1422.72 | 1422.71 | 0.01 | 0 | 44  | 0.0024   | 1 | K.GIVPDSPAHLCCR.L             | 0.98 | R&H (2D-GIST) |
| gij8896016  | FBgn0001263 | 773.41  | 1544.81 | 1544.8  | 0.01 | 0 | 65  | 2.50E-05 | 1 | K.HAEVSGGIFISDLR.E            | 1.14 | R&H (2D-GIST) |
| gij8896016  | FBgn0001263 | 799.44  | 1596.87 | 1596.87 | 0.01 | 0 | 35  | 0.018    | 1 | K.VSMEVTRPKPLR.T              | 0.98 | R&L (2D-GIST) |
| gij8896016  | FBgn0001263 | 743.87  | 1485.73 | 1485.73 | 0.01 | 0 | 45  | 0.0019   | 1 | K.VHQLFHTTYEK.A               | 1.03 | R&L (2D-GIST) |
| gij8896016  | FBgn0001263 | 917.45  | 2749.33 | 2749.32 | 0.01 | 1 | 57  | 8.90E-05 | 1 | K.NNHVTTGCVITHVYPEGQVAADKR.L  | 0.77 | F&H (2D-GIST) |
| gij8896016  | FBgn0001263 | 917.45  | 2749.33 | 2749.32 | 0    | 1 | 45  | 0.0013   | 1 | K.NNHVTTGCVITHVYPEGQVAADKR.L  | 0.99 | R&L (2D-GIST) |
| gij24658721 | FBgn0001263 | 917.45  | 2749.33 | 2749.32 | 0.01 | 1 | 38  | 0.0067   | 1 | K.NNHVTTGCVITHVYPEGQVAADKR.L  | 0.80 | R&L (2D-GIST) |
| gij24639352 | FBgn0001402 | 682.87  | 1363.72 | 1363.72 | 0    | 0 | 55  | 0.00016  | 1 | R.GGHAELLINTAAR.L             | 0.92 | R&L (2D-GIST) |

|             |             |         |         |         |       |   |     |          |   |                                             |             |               |
|-------------|-------------|---------|---------|---------|-------|---|-----|----------|---|---------------------------------------------|-------------|---------------|
| gij24639352 | FBgn0001402 | 651.7   | 1952.07 | 1952.07 | 0     | 0 | 42  | 0.0035   | 1 | R.GTHFVNPDTIVTVRPVR.T                       | 0.96        | F&H (2D-GIST) |
| gij33243112 | FBgn0001624 | 686.35  | 1370.69 | 1370.68 | 0     | 0 | 67  | 1.30E-05 | 1 | R.ALELLEDYHAR.L                             | 0.77        | F&H (2D-GIST) |
| gij33243112 | FBgn0001624 | 686.35  | 1370.69 | 1370.68 | 0.01  | 0 | 56  | 0.00016  | 1 | R.ALELLEDYHAR.L                             | 1.31        | R&L (2D-GIST) |
| gij33243112 | FBgn0001624 | 764.69  | 2291.04 | 2291.04 | 0.01  | 0 | 57  | 5.30E-05 | 1 | K.HGDILHVTNASDDEWWQAR.R                     | 1.11        | F&H (2D-GIST) |
| gij33243112 | FBgn0001624 | 765.69  | 2294.06 | 2294.05 | 0.01  | 0 | 57  | 4.90E-05 | 1 | K.HGDILHVTNASDDEWWQAR.R                     | 1.00        | R&H (2D-GIST) |
| gij33243112 | FBgn0001624 | 973.84  | 2918.49 | 2918.51 | -0.02 | 1 | 29  | 0.068    | 1 | K.RGDQLLSVNNVNLTHATHEEAAQALK.T              | 1.16        | R&H (2D-GIST) |
| gij33243112 | FBgn0001624 | 1148.04 | 2294.07 | 2294.05 | 0.01  | 0 | 80  | 2.60E-07 | 1 | K.HGDILHVTNASDDEWWQAR.R                     | 1.24        | R&H (2D-GIST) |
| gij418925   | FBgn0001942 | 790.39  | 1578.77 | 1578.76 | 0.01  | 0 | 40  | 0.0059   | 1 | K.LFVLDDEADMLSR.G                           | 0.65        | F&H (2D-GIST) |
| gij418925   | FBgn0001942 | 791.9   | 1581.79 | 1581.78 | 0.02  | 0 | 41  | 0.0041   | 1 | K.LFVLDDEADMLSR.G                           | 0.78        | R&H (2D-GIST) |
| gij418925   | FBgn0001942 | 855.46  | 1708.91 | 1708.9  | 0     | 2 | 42  | 0.0039   | 1 | R.KGVAINFITDDDRR.I                          | 1.00        | F&H (2D-GIST) |
| gij418925   | FBgn0001942 | 811.92  | 1621.83 | 1621.82 | 0     | 0 | 76  | 1.80E-06 | 1 | R.ILESGCHVVVGTTPGR.V                        | 0.72        | F&H (2D-GIST) |
| gij418925   | FBgn0001942 | 767.39  | 1532.76 | 1532.76 | 0     | 1 | 33  | 0.039    | 1 | K.GVAINFITDDDRR.I                           | 0.87        | F&H (2D-GIST) |
| gij418925   | FBgn0001942 | 813.43  | 1624.85 | 1624.84 | 0.01  | 0 | 68  | 1.00E-05 | 1 | R.ILESGCHVVVGTTPGR.V                        | 1.07        | R&H (2D-GIST) |
| gij418925   | FBgn0001942 | 767.39  | 1532.76 | 1532.76 | 0     | 1 | 35  | 0.022    | 1 | K.GVAINFITDDDRR.I                           | 0.82        | F&H (2D-GIST) |
| gij24582080 | FBgn0001942 | 811.92  | 1621.83 | 1621.82 | 0     | 0 | 69  | 7.90E-06 | 1 | R.ILESGCHVVVGTTPGR.V                        | 1.04        | R&L (2D-GIST) |
| gij24582080 | FBgn0001942 | 767.39  | 1532.76 | 1532.76 | 0     | 1 | 29  | 0.082    | 1 | K.GVAINFITDDDRR.I                           | 1.26        | R&L (2D-GIST) |
| gij418925   | FBgn0001942 | 1039.49 | 3115.45 | 3115.42 | 0.03  | 1 | 88  | 4.20E-08 | 1 | R.KVDQLTQEMSIHNFTVSAMHGDMQR.D               | 0.95        | F&H (2D-GIST) |
| gij418925   | FBgn0001942 | 1039.48 | 3115.43 | 3115.42 | 0.01  | 1 | 89  | 2.60E-08 | 1 | R.KVDQLTQEMSIHNFTVSAMHGDMQR.D               | 1.01        | R&L (2D-GIST) |
| gij1346410  | FBgn0002525 | 680.35  | 1358.69 | 1358.69 | 0     | 1 | 44  | 0.0031   | 1 | R.LREEMTQQLK.E                              | 0.91        | R&L (2D-GIST) |
| gij1346410  | FBgn0002525 | 1354.35 | 4060.04 | 4060.01 | 0.03  | 0 | 55  | 9.90E-05 | 1 | R.AGTATPQPGNTSTPRPPSAGPQPPPTHSQTASSPLSPTR.H | 0.79        | R&H (2D-GIST) |
| gij2497593  | FBgn0002526 | 771.9   | 1541.79 | 1541.79 | 0     | 0 | 62  | 3.20E-05 | 1 | R.AHLADTGSTDLLQR.A                          | 1.06        | F&H (2D-GIST) |
| gij2497593  | FBgn0002526 | 884.93  | 1767.85 | 1767.85 | 0.01  | 0 | 67  | 7.60E-06 | 1 | K.LNELAEDIEEQHR.V                           | 0.76        | R&H (2D-GIST) |
| gij2497593  | FBgn0002526 | 771.9   | 1541.79 | 1541.79 | 0     | 0 | 70  | 5.50E-06 | 1 | R.AHLADTGSTDLLQR.A                          | 1.09        | R&H (2D-GIST) |
| gij2497593  | FBgn0002526 | 769.06  | 2304.16 | 2304.15 | 0     | 0 | 62  | 3.70E-05 | 1 | R.ILNDGEDHVTVQHTQGELR.L                     | 1.15        | F&H (2D-GIST) |
| gij2497593  | FBgn0002526 | 769.06  | 2304.15 | 2304.15 | 0     | 0 | 58  | 8.50E-05 | 1 | R.ILNDGEDHVTVQHTQGELR.L                     | 0.89        | R&H (2D-GIST) |
| gij24641542 | FBgn0002562 | 797.89  | 1593.77 | 1593.77 | 0     | 0 | 70  | 4.30E-06 | 1 | R.HVDSLPGYFPDR.E                            | 3.96        | F&H (2D-GIST) |
| gij24641542 | FBgn0002562 | 1262.64 | 2523.27 | 2523.25 | 0.02  | 0 | 56  | 0.00013  | 1 | R.IQNIVELGYQTTDGHMIDLR.K                    | 2.94        | R&H (2D-GIST) |
| gij24641542 | FBgn0002562 | 1057.02 | 2112.02 | 2112.02 | 0     | 0 | 89  | 5.90E-08 | 1 | K.LMGLGEHWYSESNYILR.E                       | 14.24       | F&H (2D-GIST) |
| gij24641542 | FBgn0002562 | 965.48  | 1928.95 | 1928.96 | -0.01 | 0 | 31  | 0.044    | 1 | K.SIAQVYFQFMHHLPK.Y                         | 5.84        | R&L (2D-GIST) |
| gij24641542 | FBgn0002562 | 1055.51 | 2109.01 | 2109    | 0.02  | 0 | 100 | 4.60E-09 | 1 | K.LMGLGEHWYSESNYILR.E                       | singleton L | R&L (2D-GIST) |
| gij1438748  | FBgn0002563 | 1055.48 | 2108.94 | 2108.93 | 0.01  | 0 | 45  | 0.00078  | 1 | K.YDFPLDISEPHCGFPDR.L                       | 9.19        | F&H (2D-GIST) |
| gij1438748  | FBgn0002563 | 667.02  | 1998.03 | 1998.02 | 0.01  | 1 | 41  | 0.0055   | 1 | R.RGEWWLYNVHQLLSR.Y                         | 14.29       | R&L (2D-GIST) |
| gij2454565  | FBgn0002564 | 1039.5  | 2076.99 | 2076.96 | 0.03  | 0 | 71  | 2.50E-06 | 1 | K.YDFPLDISEPHNAFPDR.L                       | 4.81        | F&H (2D-GIST) |
| gij2454565  | FBgn0002564 | 591.76  | 1181.51 | 1181.5  | 0.01  | 0 | 55  | 4.00E-05 | 1 | K.EFSWTAEDR.I                               | singleton L | R&L (2D-GIST) |
| gij17647601 | FBgn0002564 | 553.31  | 1104.62 | 1104.62 | 0     | 0 | 62  | 4.80E-05 | 1 | K.FLFEIVHR.I                                | 4.66        | F&H (2D-GIST) |
| gij17647601 | FBgn0002564 | 977.52  | 1953.03 | 1953.03 | 0     | 1 | 64  | 2.50E-05 | 1 | R.RGEYWIYVQVQILAR.Y                         | 9.32        | F&H (2D-GIST) |
| gij17647601 | FBgn0002564 | 652.02  | 1953.04 | 1953.03 | 0.01  | 1 | 42  | 0.0041   | 1 | R.RGEYWIYVQVQILAR.Y                         | 15.07       | F&H (2D-GIST) |
| gij17647601 | FBgn0002564 | 551.81  | 1101.6  | 1101.6  | 0     | 0 | 62  | 5.60E-05 | 1 | K.FLFEIVHR.I                                | 6.24        | R&L (2D-GIST) |
| gij17647601 | FBgn0002564 | 976.02  | 1950.02 | 1950.01 | 0.01  | 1 | 45  | 0.0019   | 1 | R.RGEYWIYVQVQILAR.Y                         | singleton L | R&L (2D-GIST) |

|             |             |         |         |         |      |   |    |          |   |                                |             |               |
|-------------|-------------|---------|---------|---------|------|---|----|----------|---|--------------------------------|-------------|---------------|
| gij17647601 | FBgn0002564 | 651.01  | 1950.02 | 1950.01 | 0    | 1 | 46 | 0.0014   | 1 | R.RGEYWIYNVQQILAR.Y            | singleton L | R&L (2D-GIST) |
| gij85046    | FBgn0002564 | 551.81  | 1101.6  | 1101.6  | 0    | 0 | 54 | 0.0004   | 1 | K.FLFEIVHR.I                   | singleton L | R&L (2D-GIST) |
| gij2495185  | FBgn0002565 | 705.37  | 1408.74 | 1408.72 | 0.01 | 0 | 70 | 5.70E-06 | 1 | K.QMDNIYNVVIR.T                | 2.54        | F&H (2D-GIST) |
| gij17864446 | FBgn0002565 | 703.86  | 1405.71 | 1405.7  | 0.01 | 0 | 57 | 0.00013  | 1 | K.QMDNIYNVVIR.T                | 1.25        | R&L (2D-GIST) |
| gij2495185  | FBgn0002565 | 653.87  | 1305.73 | 1305.73 | 0    | 0 | 54 | 0.00024  | 1 | K.VHLEAGVNHK.R                 | 1.45        | F&H (2D-GIST) |
| gij2495185  | FBgn0002565 | 921.43  | 1840.85 | 1840.85 | 0    | 1 | 84 | 1.30E-07 | 1 | K.FKLDQSEAHCGVPCR.M            | 1.45        | F&H (2D-GIST) |
| gij2495185  | FBgn0002565 | 924.45  | 1846.9  | 1846.89 | 0    | 1 | 92 | 3.10E-08 | 1 | K.FKLDQSEAHCGVPCR.M            | 1.44        | R&H (2D-GIST) |
| gij2495185  | FBgn0002565 | 970.47  | 2908.38 | 2908.37 | 0.01 | 0 | 59 | 7.50E-05 | 1 | R.LSHDLGEVPAFNMYVPTESGYASNLR.T | 2.08        | R&L (2D-GIST) |
| gij2495185  | FBgn0002565 | 676.34  | 1350.66 | 1350.65 | 0    | 0 | 49 | 0.0005   | 1 | R.TYYGVPQWHR.E                 | 1.36        | F&H (2D-GIST) |
| gij2495185  | FBgn0002565 | 650.86  | 1299.7  | 1299.69 | 0    | 0 | 54 | 0.00036  | 1 | K.VHLEAGVNHK.R                 | 1.38        | F&H (2D-GIST) |
| gij2495185  | FBgn0002565 | 784.85  | 1567.68 | 1567.67 | 0    | 0 | 77 | 2.30E-07 | 1 | K.HDYFFDVHNFK.F                | 1.53        | F&H (2D-GIST) |
| gij2495185  | FBgn0002565 | 924.46  | 1846.91 | 1846.89 | 0.01 | 1 | 82 | 3.40E-07 | 1 | K.FKLDQSEAHCGVPCR.M            | 1.49        | R&H (2D-GIST) |
| gij2495185  | FBgn0002565 | 653.88  | 1305.74 | 1305.73 | 0    | 0 | 54 | 0.00023  | 1 | K.VHLEAGVNHK.R                 | 1.71        | R&H (2D-GIST) |
| gij2495185  | FBgn0002565 | 762.85  | 1523.68 | 1523.68 | 0.01 | 0 | 67 | 5.10E-06 | 1 | K.LDQSEAHCGVPCR.M              | 1.26        | R&L (2D-GIST) |
| gij2495185  | FBgn0002565 | 674.83  | 1347.64 | 1347.64 | 0    | 0 | 61 | 3.50E-05 | 1 | R.TYYGVPQWHR.E                 | 1.58        | R&L (2D-GIST) |
| gij2495185  | FBgn0002565 | 784.85  | 1567.68 | 1567.67 | 0.01 | 0 | 81 | 1.20E-07 | 1 | K.HDYFFDVHNFK.F                | 1.72        | R&L (2D-GIST) |
| gij2495185  | FBgn0002565 | 676.34  | 1350.66 | 1350.65 | 0.01 | 0 | 38 | 0.0066   | 1 | R.TYYGVPQWHR.E                 | 2.31        | F&H (2D-GIST) |
| gij2495185  | FBgn0002565 | 784.85  | 1567.68 | 1567.67 | 0    | 0 | 54 | 4.80E-05 | 1 | K.HDYFFDVHNFK.F                | 1.54        | R&L (2D-GIST) |
| gij2495185  | FBgn0002565 | 674.83  | 1347.64 | 1347.64 | 0    | 0 | 62 | 2.80E-05 | 1 | R.TYYGVPQWHR.E                 | 1.55        | R&L (2D-GIST) |
| gij2495185  | FBgn0002565 | 1299.16 | 2596.31 | 2596.28 | 0.04 | 1 | 54 | 0.00019  | 1 | K.TIVSHYWHLMETYPEYHKK.D        | 1.48        | F&H (2D-GIST) |
| gij2495185  | FBgn0002565 | 488.29  | 1461.83 | 1461.83 | 0    | 1 | 35 | 0.017    | 1 | K.VHLEAGVNHK.R.A               | 1.61        | F&H (2D-GIST) |
| gij2495185  | FBgn0002565 | 731.92  | 1461.83 | 1461.83 | 0    | 1 | 54 | 0.00017  | 1 | K.VHLEAGVNHK.R.A               | 1.66        | F&H (2D-GIST) |
| gij2495185  | FBgn0002565 | 863.42  | 2587.23 | 2587.22 | 0.01 | 1 | 53 | 0.0002   | 1 | K.TIVSHYWHLMETYPEYHKK.D        | 1.58        | F&H (2D-GIST) |
| gij2495185  | FBgn0002565 | 866.44  | 2596.29 | 2596.28 | 0.01 | 1 | 48 | 0.00075  | 1 | K.TIVSHYWHLMETYPEYHKK.D        | 1.43        | R&H (2D-GIST) |
| gij2495185  | FBgn0002565 | 1294.62 | 2587.23 | 2587.22 | 0.01 | 1 | 70 | 3.80E-06 | 1 | K.TIVSHYWHLMETYPEYHKK.D        | 1.46        | R&L (2D-GIST) |
| gij2495185  | FBgn0002565 | 728.91  | 1455.8  | 1455.79 | 0.01 | 1 | 54 | 0.00026  | 1 | K.VHLEAGVNHK.R.A               | 1.60        | R&L (2D-GIST) |
| gij2495185  | FBgn0002565 | 486.27  | 1455.8  | 1455.79 | 0    | 1 | 46 | 0.0016   | 1 | K.VHLEAGVNHK.R.A               | 1.83        | R&L (2D-GIST) |
| gij2495185  | FBgn0002565 | 1209.57 | 2417.13 | 2417.12 | 0.01 | 0 | 48 | 0.00059  | 1 | K.TIVSHYWHLMETYPEYHKK.K        | 2.37        | R&L (2D-GIST) |
| gij17864446 | FBgn0002565 | 1052.81 | 3155.42 | 3155.4  | 0.01 | 0 | 59 | 2.00E-05 | 1 | K.YDEHGHEIPLEHNYQNFFELEHFK.V   | 1.53        | F&H (2D-GIST) |
| gij2495185  | FBgn0002565 | 1052.82 | 3155.44 | 3155.4  | 0.03 | 0 | 65 | 6.80E-06 | 1 | K.YDEHGHEIPLEHNYQNFFELEHFK.V   | 1.54        | R&L (2D-GIST) |
| gij24638921 | FBgn0002579 | 842.47  | 1682.93 | 1682.93 | 0    | 2 | 59 | 6.10E-05 | 1 | R.KREELSNILTQLR.K              | 0.89        | F&H (2D-GIST) |
| gij24638921 | FBgn0002579 | 561.98  | 1682.93 | 1682.93 | 0    | 2 | 41 | 0.0041   | 1 | R.KREELSNILTQLR.K              | 0.95        | F&H (2D-GIST) |
| gij24638921 | FBgn0002579 | 561.99  | 1682.93 | 1682.93 | 0    | 2 | 44 | 0.0021   | 1 | R.KREELSNILTQLR.K              | 0.81        | F&H (2D-GIST) |
| gij24638921 | FBgn0002579 | 842.48  | 1682.94 | 1682.93 | 0    | 2 | 61 | 3.90E-05 | 1 | R.KREELSNILTQLR.K              | 0.86        | F&H (2D-GIST) |
| gij24638921 | FBgn0002579 | 758.93  | 1515.85 | 1515.84 | 0    | 1 | 54 | 0.00025  | 1 | K.REELSNILTQLR.K               | 1.06        | R&H (2D-GIST) |
| gij24638921 | FBgn0002579 | 561.99  | 1682.94 | 1682.93 | 0.01 | 2 | 53 | 0.00022  | 1 | R.KREELSNILTQLR.K              | 1.01        | R&L (2D-GIST) |
| gij24638921 | FBgn0002579 | 842.48  | 1682.94 | 1682.93 | 0    | 2 | 69 | 5.80E-06 | 1 | R.KREELSNILTQLR.K              | 1.13        | R&L (2D-GIST) |
| gij1079135  | FBgn0002607 | 638.87  | 1275.73 | 1275.72 | 0.01 | 1 | 38 | 0.0043   | 1 | K.KQELIALHAK.E                 | 1.37        | R&L (2D-GIST) |
| gij27819985 | FBgn0002607 | 655.33  | 1308.65 | 1308.64 | 0    | 0 | 35 | 0.013    | 1 | R.HLYHDLYMK.C                  | 1.35        | R&H (2D-GIST) |

|             |             |         |         |         |       |   |     |          |   |                                |      |               |
|-------------|-------------|---------|---------|---------|-------|---|-----|----------|---|--------------------------------|------|---------------|
| gii17136324 | FBgn0002622 | 667.36  | 1332.7  | 1332.69 | 0.01  | 0 | 53  | 0.00034  | 1 | R.GLCAIAQAESLR.Y               | 0.53 | F&H (2D-GIST) |
| gii38047525 | FBgn0002622 | 665.85  | 1329.68 | 1329.67 | 0.01  | 0 | 67  | 1.70E-05 | 1 | R.GLCAIAQAESLR.Y               | 1.19 | R&L (2D-GIST) |
| gii17136324 | FBgn0002622 | 1271.57 | 2541.13 | 2541.13 | 0     | 0 | 69  | 1.80E-06 | 1 | K.FVDGLMIHSGDPCNDYVETATR.H     | 0.76 | R&H (2D-GIST) |
| gii296094   | FBgn0002622 | 534.77  | 1067.52 | 1067.51 | 0     | 1 | 37  | 0.0073   | 1 | K.RFNFTGR.I                    | 0.75 | F&H (2D-GIST) |
| gii7248646  | FBgn0002719 | 777.67  | 2330    | 2330    | 0     | 0 | 52  | 5.90E-05 | 1 | R.ATGDLYDEFIDEFMHACVR.R        | 0.74 | R&L (2D-GIST) |
| gii7248648  | FBgn0002719 | 701.38  | 2101.11 | 2101.1  | 0.01  | 0 | 59  | 8.00E-05 | 1 | K.LHFAQLHEPIDTLAEAVR.K         | 1.12 | F&H (2D-GIST) |
| gii6634088  | FBgn0002719 | 1051.56 | 2101.1  | 2101.1  | 0.01  | 0 | 72  | 3.60E-06 | 1 | K.LHFAQLHEPIDTLAEAVR.K         | 1.18 | F&H (2D-GIST) |
| gii6634088  | FBgn0002719 | 702.38  | 2104.12 | 2104.11 | 0     | 0 | 57  | 0.00012  | 1 | K.LHFAQLHEPIDTLAEAVR.K         | 0.97 | R&H (2D-GIST) |
| gii6634088  | FBgn0002719 | 1051.56 | 2101.11 | 2101.1  | 0.01  | 0 | 71  | 4.80E-06 | 1 | K.LHFAQLHEPIDTLAEAVR.K         | 0.88 | R&L (2D-GIST) |
| gii482280   | FBgn0002741 | 875.98  | 1749.94 | 1749.93 | 0.01  | 1 | 35  | 0.021    | 1 | K.LKVDDLAAELDASQK.E            | 0.56 | F&H (2D-GIST) |
| gii482280   | FBgn0002741 | 602.84  | 1203.66 | 1203.65 | 0.01  | 0 | 36  | 0.017    | 1 | K.LSIENSDLLR.Q                 | 0.67 | F&H (2D-GIST) |
| gii482280   | FBgn0002741 | 1086.09 | 2170.16 | 2170.15 | 0.01  | 1 | 134 | 2.20E-12 | 1 | K.KLEADINELEIALDHANK.A         | 0.89 | F&H (2D-GIST) |
| gii482280   | FBgn0002741 | 774.37  | 2320.1  | 2320.12 | -0.02 | 0 | 49  | 0.00039  | 1 | K.AEDMSNLTYLNDASVLHNL.R.Q      | 0.95 | F&H (2D-GIST) |
| gii482280   | FBgn0002741 | 639.82  | 1277.62 | 1277.61 | 0.01  | 0 | 51  | 0.00046  | 1 | R.AGVLGQMEEFR.D                | 0.52 | F&H (2D-GIST) |
| gii482280   | FBgn0002741 | 952.48  | 1902.95 | 1902.93 | 0.01  | 1 | 37  | 0.013    | 1 | R.LKGAYEEGQEQLAEVR.R           | 0.57 | F&H (2D-GIST) |
| gii482280   | FBgn0002741 | 721.38  | 2161.11 | 2161.09 | 0.02  | 1 | 54  | 0.00024  | 1 | K.KLEADINELEIALDHANK.A         | 0.63 | F&H (2D-GIST) |
| gii482280   | FBgn0002741 | 686.38  | 1370.75 | 1370.74 | 0.01  | 1 | 64  | 2.90E-05 | 1 | K.KLSIENSDLLR.Q                | 0.75 | F&H (2D-GIST) |
| gii482280   | FBgn0002741 | 674.35  | 1346.69 | 1346.69 | 0.01  | 0 | 56  | 0.00018  | 1 | K.EQLNSLMTTLR.S                | 0.75 | F&H (2D-GIST) |
| gii482280   | FBgn0002741 | 643.84  | 1285.66 | 1285.65 | 0.01  | 0 | 62  | 4.60E-05 | 1 | K.LTQEA VADLER.N               | 0.76 | F&H (2D-GIST) |
| gii482280   | FBgn0002741 | 665.66  | 1993.97 | 1993.97 | 0     | 0 | 36  | 0.015    | 1 | R.DLEEANIQHES TLANLR.K         | 0.78 | F&H (2D-GIST) |
| gii482280   | FBgn0002741 | 665.82  | 1329.63 | 1329.62 | 0.01  | 0 | 74  | 2.30E-06 | 1 | R.ITAAVMHMGGMK.F               | 0.79 | F&H (2D-GIST) |
| gii482280   | FBgn0002741 | 543.77  | 1085.53 | 1085.53 | 0     | 0 | 47  | 0.00096  | 1 | K.ANAEAQVWR.S                  | 0.80 | F&H (2D-GIST) |
| gii482280   | FBgn0002741 | 810.88  | 1619.75 | 1619.74 | 0.01  | 0 | 76  | 8.00E-07 | 1 | K.GAYEEGQEQLAEVR.R             | 0.80 | F&H (2D-GIST) |
| gii482280   | FBgn0002741 | 851.1   | 2550.29 | 2550.27 | 0.02  | 1 | 59  | 6.10E-05 | 1 | R.KLESELQTLHSDDLDELLNEAK.N     | 0.81 | F&H (2D-GIST) |
| gii482280   | FBgn0002741 | 543.3   | 1084.59 | 1084.59 | 0     | 0 | 49  | 0.0013   | 1 | R.AQLELSQVR.Q                  | 0.82 | F&H (2D-GIST) |
| gii482280   | FBgn0002741 | 868.92  | 1735.83 | 1735.83 | 0.01  | 0 | 29  | 0.073    | 1 | K.VLIESTELNDDQYR.L             | 0.83 | F&H (2D-GIST) |
| gii482280   | FBgn0002741 | 744.91  | 1487.8  | 1487.78 | 0.01  | 1 | 64  | 2.60E-05 | 1 | K.ISLTTQLEDTKR.L               | 0.90 | F&H (2D-GIST) |
| gii482280   | FBgn0002741 | 1276.16 | 2550.3  | 2550.27 | 0.03  | 1 | 69  | 5.70E-06 | 1 | R.KLESELQTLHSDDLDELLNEAK.N     | 0.94 | F&H (2D-GIST) |
| gii482280   | FBgn0002741 | 998     | 1993.98 | 1993.97 | 0.01  | 0 | 89  | 7.40E-08 | 1 | R.DLEEANIQHES TLANLR.K         | 0.97 | F&H (2D-GIST) |
| gii482280   | FBgn0002741 | 1150.56 | 2299.11 | 2299.13 | -0.03 | 0 | 42  | 0.0034   | 1 | K.GSLEDQVVQTNPVLEAFGNAK.T      | 1.18 | F&H (2D-GIST) |
| gii482280   | FBgn0002741 | 726.34  | 1450.66 | 1450.66 | 0     | 1 | 53  | 0.00014  | 1 | K.ELSFQSEEDRK.N                | 1.20 | F&H (2D-GIST) |
| gii482280   | FBgn0002741 | 1159.57 | 2317.13 | 2317.1  | 0.03  | 0 | 81  | 3.90E-07 | 1 | K.AEDMSNLTYLNDASVLHNL.R.Q      | 1.43 | F&H (2D-GIST) |
| gii482280   | FBgn0002741 | 987     | 1971.98 | 1971.96 | 0.02  | 1 | 99  | 8.00E-09 | 1 | K.AKLEQTLDEEDSLER.E            | 1.43 | F&H (2D-GIST) |
| gii482280   | FBgn0002741 | 1031.19 | 3090.55 | 3090.52 | 0.03  | 2 | 33  | 0.022    | 1 | K.RLEAEKDELQAALAEAEAALEQEENK.V | 0.72 | R&H (2D-GIST) |
| gii482955   | FBgn0002741 | 867.94  | 1733.86 | 1733.84 | 0.02  | 0 | 36  | 0.015    | 1 | K.LEQTLDEEDSLER.E              | 0.75 | R&H (2D-GIST) |
| gii482955   | FBgn0002741 | 1086.09 | 2170.17 | 2170.15 | 0.02  | 1 | 120 | 5.00E-11 | 1 | K.KLEADINELEIALDHANK.A         | 0.76 | R&H (2D-GIST) |
| gii482280   | FBgn0002741 | 854.12  | 2559.35 | 2559.33 | 0.02  | 1 | 59  | 7.30E-05 | 1 | R.KLESELQTLHSDDLDELLNEAK.N     | 0.89 | R&H (2D-GIST) |
| gii482955   | FBgn0002741 | 870.44  | 1738.86 | 1738.85 | 0.01  | 0 | 40  | 0.0045   | 1 | K.VLIESTELNDDQYR.L             | 0.98 | R&H (2D-GIST) |
| gii482280   | FBgn0002741 | 660.35  | 1978.02 | 1978    | 0.01  | 1 | 54  | 0.00028  | 1 | K.AKLEQTLDEEDSLER.E            | 0.99 | R&H (2D-GIST) |



|           |             |         |         |         |      |   |     |          |   |                            |      |               |
|-----------|-------------|---------|---------|---------|------|---|-----|----------|---|----------------------------|------|---------------|
| gii482955 | FBgn0002741 | 612.34  | 1222.66 | 1222.66 | 0.01 | 0 | 65  | 2.00E-05 | 1 | K.TALLDSLSGK.G             | 1.02 | R&H (2D-GIST) |
| gii482955 | FBgn0002741 | 645.35  | 1288.68 | 1288.67 | 0.01 | 0 | 47  | 0.0013   | 1 | K.LTQEAVADLER.N            | 1.03 | R&H (2D-GIST) |
| gii482955 | FBgn0002741 | 875.98  | 1749.95 | 1749.93 | 0.01 | 1 | 32  | 0.042    | 1 | K.LKVDDLAAELDASQK.E        | 1.03 | R&H (2D-GIST) |
| gii482955 | FBgn0002741 | 602.84  | 1203.66 | 1203.65 | 0.01 | 0 | 49  | 0.00087  | 1 | K.LSIENS DLLR.Q            | 1.03 | R&H (2D-GIST) |
| gii482955 | FBgn0002741 | 680.38  | 1358.74 | 1358.74 | 0.01 | 1 | 29  | 0.097    | 1 | K.KAEELHAAEVK.V            | 1.13 | R&H (2D-GIST) |
| gii482955 | FBgn0002741 | 688.84  | 1375.68 | 1375.67 | 0.01 | 0 | 36  | 0.012    | 1 | K.DIQTAL EEEQR.A           | 1.19 | R&H (2D-GIST) |
| gii482955 | FBgn0002741 | 821.41  | 1640.8  | 1640.78 | 0.02 | 1 | 28  | 0.072    | 1 | R.IQEKEEEFENTR.K           | 1.25 | R&H (2D-GIST) |
| gii482280 | FBgn0002741 | 767.39  | 2299.15 | 2299.13 | 0.02 | 0 | 42  | 0.0039   | 1 | K.GSLEDQVVQTNPVLEAFGNAK.T  | 0.64 | R&L (2D-GIST) |
| gii482280 | FBgn0002741 | 987     | 1971.98 | 1971.96 | 0.02 | 1 | 97  | 1.30E-08 | 1 | K.AKLEQTLDELEDSL E.R       | 0.71 | R&L (2D-GIST) |
| gii482280 | FBgn0002741 | 543.77  | 1085.53 | 1085.53 | 0    | 0 | 48  | 0.00083  | 1 | K.ANAEAQVWR.S              | 0.76 | R&L (2D-GIST) |
| gii482280 | FBgn0002741 | 744.9   | 1487.79 | 1487.78 | 0.01 | 1 | 66  | 1.60E-05 | 1 | K.ISLTTQLEDTKR.L           | 0.78 | R&L (2D-GIST) |
| gii482280 | FBgn0002741 | 829.92  | 1657.82 | 1657.8  | 0.01 | 0 | 50  | 0.00068  | 1 | R.LAEAEE TIESLNQK.C        | 0.80 | R&L (2D-GIST) |
| gii482280 | FBgn0002741 | 1276.15 | 2550.29 | 2550.27 | 0.02 | 1 | 73  | 2.40E-06 | 1 | R.KLESELQTLHSDLELLNEAK.N   | 0.83 | R&L (2D-GIST) |
| gii482280 | FBgn0002741 | 998.47  | 1994.93 | 1994.9  | 0.03 | 0 | 104 | 1.20E-09 | 1 | K.HNDAVAEMAEQVDQLNK.L      | 0.86 | R&L (2D-GIST) |
| gii482280 | FBgn0002741 | 639.81  | 1277.62 | 1277.61 | 0.01 | 0 | 58  | 8.50E-05 | 1 | R.AGVLGQMEEFR.D            | 0.90 | R&L (2D-GIST) |
| gii482280 | FBgn0002741 | 863.42  | 1724.82 | 1724.8  | 0.02 | 1 | 46  | 0.0013   | 1 | K.EKNEY YGQLNDLR.A         | 0.91 | R&L (2D-GIST) |
| gii482280 | FBgn0002741 | 721.38  | 2161.1  | 2161.09 | 0.01 | 1 | 42  | 0.004    | 1 | K.KLEADINELEIALDHANK.A     | 0.91 | R&L (2D-GIST) |
| gii482280 | FBgn0002741 | 686.38  | 1370.75 | 1370.74 | 0.01 | 1 | 73  | 3.60E-06 | 1 | K.KLSIENS DLLR.Q           | 0.92 | R&L (2D-GIST) |
| gii482280 | FBgn0002741 | 1150.59 | 2299.16 | 2299.13 | 0.02 | 0 | 32  | 0.033    | 1 | K.GSLEDQVVQTNPVLEAFGNAK.T  | 0.94 | R&L (2D-GIST) |
| gii482280 | FBgn0002741 | 726.34  | 1450.67 | 1450.66 | 0.01 | 1 | 50  | 0.00033  | 1 | K.ELSFQSEEDRK.N            | 0.95 | R&L (2D-GIST) |
| gii482280 | FBgn0002741 | 665.82  | 1329.63 | 1329.62 | 0.01 | 0 | 78  | 7.90E-07 | 1 | R.ITAAVMHMGGMK.F           | 1.01 | R&L (2D-GIST) |
| gii482280 | FBgn0002741 | 665.98  | 1994.91 | 1994.9  | 0.01 | 0 | 54  | 0.0001   | 1 | K.HNDAVAEMAEQVDQLNK.L      | 1.03 | R&L (2D-GIST) |
| gii482280 | FBgn0002741 | 758.86  | 1515.7  | 1515.69 | 0.01 | 0 | 72  | 2.30E-06 | 1 | R.IEELEEEVEAER.Q           | 1.03 | R&L (2D-GIST) |
| gii482280 | FBgn0002741 | 952.48  | 1902.95 | 1902.93 | 0.02 | 1 | 40  | 0.0056   | 1 | R.LKGAYEEGQEQLAVR.R        | 1.04 | R&L (2D-GIST) |
| gii482280 | FBgn0002741 | 810.88  | 1619.75 | 1619.74 | 0    | 0 | 66  | 7.50E-06 | 1 | K.GAYEEGQEQLAVR.R          | 1.12 | R&L (2D-GIST) |
| gii482280 | FBgn0002741 | 699.85  | 1397.69 | 1397.68 | 0.01 | 1 | 47  | 0.00098  | 1 | K.KGGGFATVSSAYK.E          | 1.22 | R&L (2D-GIST) |
| gii482280 | FBgn0002741 | 674.36  | 1346.7  | 1346.69 | 0.01 | 0 | 56  | 0.00019  | 1 | K.EQLNSLMTTLR.S            | 1.23 | R&L (2D-GIST) |
| gii482955 | FBgn0002741 | 819.73  | 2456.17 | 2456.16 | 0.01 | 1 | 35  | 0.0097   | 1 | R.NLEHDLDNLREQVEEEAEGK.A   | 2.39 | F&H (2D-GIST) |
| gii103256 | FBgn0002741 | 1229.1  | 2456.19 | 2456.16 | 0.03 | 1 | 57  | 8.00E-05 | 1 | R.NLEHDLDNLREQVEEEAEGK.A   | 3.91 | F&H (2D-GIST) |
| gii482955 | FBgn0002741 | 900.98  | 1799.94 | 1799.93 | 0.01 | 0 | 46  | 0.0023   | 1 | R.ATSVRPQFDGLAFPPR.F       | 0.93 | F&H (2D-GIST) |
| gii482955 | FBgn0002741 | 998     | 1993.98 | 1993.97 | 0.01 | 0 | 87  | 1.40E-07 | 1 | R.DLEEANI QHES TLANLR.K    | 0.96 | F&H (2D-GIST) |
| gii482955 | FBgn0002741 | 600.98  | 1799.93 | 1799.93 | 0    | 0 | 50  | 0.00082  | 1 | R.ATSVRPQFDGLAFPPR.F       | 0.99 | F&H (2D-GIST) |
| gii482955 | FBgn0002741 | 665.66  | 1993.97 | 1993.97 | 0    | 0 | 35  | 0.022    | 1 | R.DLEEANI QHES TLANLR.K    | 1.22 | F&H (2D-GIST) |
| gii482955 | FBgn0002741 | 796.39  | 2386.16 | 2386.15 | 0.01 | 0 | 30  | 0.046    | 1 | K.IEDMADMTV LNTPCVLHNL R.Q | 0.71 | R&H (2D-GIST) |
| gii482955 | FBgn0002741 | 902.49  | 1802.96 | 1802.95 | 0.01 | 0 | 33  | 0.036    | 1 | R.ATSVRPQFDGLAFPPR.F       | 0.82 | R&H (2D-GIST) |
| gii482955 | FBgn0002741 | 819.73  | 2456.17 | 2456.16 | 0.02 | 1 | 30  | 0.036    | 1 | R.NLEHDLDNLREQVEEEAEGK.A   | 0.99 | R&H (2D-GIST) |
| gii482955 | FBgn0002741 | 1161.07 | 2320.13 | 2320.12 | 0.01 | 0 | 83  | 2.50E-07 | 1 | K.AEDMSNLTYLNDASVLHNL R.Q  | 1.08 | R&H (2D-GIST) |
| gii482280 | FBgn0002741 | 773.38  | 2317.11 | 2317.1  | 0.01 | 0 | 52  | 0.00023  | 1 | K.AEDMSNLTYLNDASVLHNL R.Q  | 0.97 | R&L (2D-GIST) |
| gii482280 | FBgn0002741 | 561.27  | 1680.79 | 1680.8  | 0    | 1 | 31  | 0.027    | 1 | R.AGVLGQMEEFRDER.L         | 0.51 | F&H (2D-GIST) |

|             |             |         |         |         |       |   |     |          |   |                                              |      |               |
|-------------|-------------|---------|---------|---------|-------|---|-----|----------|---|----------------------------------------------|------|---------------|
| gij482280   | FBgn0002741 | 890.44  | 1778.86 | 1778.86 | 0     | 1 | 33  | 0.022    | 1 | K.GAYEEGQEQLEAVRR.E                          | 0.86 | F&H (2D-GIST) |
| gij482280   | FBgn0002741 | 841.41  | 1680.8  | 1680.8  | 0     | 1 | 35  | 0.0099   | 1 | R.AGVLGQMEEFRDER.L                           | 0.91 | F&H (2D-GIST) |
| gij482280   | FBgn0002741 | 507.26  | 1012.51 | 1012.51 | 0     | 0 | 36  | 0.011    | 1 | R.STQPHFVR.C                                 | 0.77 | F&H (2D-GIST) |
| gij482280   | FBgn0002741 | 640.82  | 1279.62 | 1279.62 | 0     | 0 | 56  | 0.00011  | 1 | R.NLEHDLNLR.E                                | 0.78 | F&H (2D-GIST) |
| gij482280   | FBgn0002741 | 786.39  | 1570.77 | 1570.77 | 0     | 1 | 57  | 0.00014  | 1 | R.RANALQNELEESR.T                            | 0.97 | F&H (2D-GIST) |
| gij482280   | FBgn0002741 | 896.43  | 1790.84 | 1790.84 | 0     | 2 | 53  | 0.0002   | 1 | R.RIQEKEEEFENTR.K                            | 1.07 | F&H (2D-GIST) |
| gij20455497 | FBgn0002741 | 841.41  | 1680.8  | 1680.8  | 0.01  | 1 | 38  | 0.0055   | 1 | R.AGVLGQMEEFRDER.L                           | 0.67 | R&H (2D-GIST) |
| gij20455497 | FBgn0002741 | 890.44  | 1778.87 | 1778.86 | 0.01  | 1 | 32  | 0.029    | 1 | K.GAYEEGQEQLEAVRR.E                          | 0.86 | R&H (2D-GIST) |
| gij20455497 | FBgn0002741 | 899.45  | 1796.88 | 1796.88 | 0     | 2 | 49  | 0.00061  | 1 | R.RIQEKEEEFENTR.K                            | 1.03 | R&H (2D-GIST) |
| gij20455497 | FBgn0002741 | 508.77  | 1015.53 | 1015.53 | 0     | 0 | 33  | 0.023    | 1 | R.STQPHFVR.C                                 | 1.26 | R&H (2D-GIST) |
| gij482955   | FBgn0002741 | 900.98  | 1799.94 | 1799.93 | 0.01  | 0 | 31  | 0.064    | 1 | R.ATSVRPQFDGLAFPPR.F                         | 0.78 | R&L (2D-GIST) |
| gij482955   | FBgn0002741 | 640.82  | 1279.62 | 1279.62 | 0     | 0 | 47  | 0.00072  | 1 | R.NLEHDLNLR.E                                | 1.00 | R&L (2D-GIST) |
| gij482280   | FBgn0002741 | 1385.01 | 4152.02 | 4152    | 0.01  | 1 | 173 | 1.30E-16 | 1 | R.RNEVPPHIFAISDGAYVDMMLTNHVNQSMMLITGESGAGK.T | 0.93 | F&H (2D-GIST) |
| gij482280   | FBgn0002741 | 895.8   | 2684.36 | 2684.35 | 0.01  | 0 | 73  | 3.00E-06 | 1 | K.QPGVVDAHLVMHQLTCNGVLEGIR.I                 | 1.10 | F&H (2D-GIST) |
| gij20455497 | FBgn0002741 | 895.8   | 2684.37 | 2684.35 | 0.01  | 0 | 73  | 2.90E-06 | 1 | K.QPGVVDAHLVMHQLTCNGVLEGIR.I                 | 0.75 | R&L (2D-GIST) |
| gij20455497 | FBgn0002741 | 1385.03 | 4152.06 | 4152    | 0.06  | 1 | 126 | 7.30E-12 | 1 | R.RNEVPPHIFAISDGAYVDMMLTNHVNQSMMLITGESGAGK.T | 0.80 | R&L (2D-GIST) |
| gij482280   | FBgn0002741 | 786.39  | 1570.76 | 1570.77 | -0.01 | 1 | 40  | 0.0051   | 1 | R.RANALQNELEESR.T                            | 1.07 | R&L (2D-GIST) |
| gij482280   | FBgn0002741 | 717.7   | 2150.07 | 2150.07 | 0     | 1 | 35  | 0.018    | 1 | R.RDLEEANIQHESSTLANLR.K                      | 0.93 | F&H (2D-GIST) |
| gij482280   | FBgn0002741 | 799.08  | 2394.22 | 2394.19 | 0.03  | 1 | 34  | 0.025    | 1 | K.LLIEIFADHAGQSGGGEQAKGGR.G                  | 1.57 | F&H (2D-GIST) |
| gij482280   | FBgn0002741 | 718.71  | 2153.09 | 2153.09 | 0     | 1 | 48  | 0.00087  | 1 | R.RDLEEANIQHESSTLANLR.K                      | 0.89 | R&H (2D-GIST) |
| gij482280   | FBgn0002741 | 869.76  | 2606.25 | 2606.24 | 0.01  | 1 | 63  | 2.40E-05 | 1 | K.LQQFFNHHMFVLEQEEYKR.E                      | 0.84 | R&L (2D-GIST) |
| gij482280   | FBgn0002741 | 895.8   | 2684.37 | 2684.35 | 0.01  | 0 | 57  | 0.00012  | 1 | K.QPGVVDAHLVMHQLTCNGVLEGIR.I                 | 0.85 | R&L (2D-GIST) |
| gij17136340 | FBgn0002772 | 747.43  | 1492.85 | 1492.85 | 0     | 0 | 60  | 2.80E-05 | 1 | R.ALNLNPTLALIEK.L                            | 0.68 | F&H (2D-GIST) |
| gij17136340 | FBgn0002772 | 768.41  | 1534.8  | 1534.79 | 0.01  | 0 | 48  | 0.0011   | 1 | K.LDEFPLPIYSQVK.K                            | 0.87 | F&H (2D-GIST) |
| gij17136340 | FBgn0002772 | 747.44  | 1492.86 | 1492.85 | 0.01  | 0 | 73  | 1.20E-06 | 1 | R.ALNLNPTLALIEK.L                            | 1.15 | R&L (2D-GIST) |
| gij17136340 | FBgn0002772 | 768.41  | 1534.8  | 1534.79 | 0.01  | 0 | 57  | 0.00013  | 1 | K.LDEFPLPIYSQVK.K                            | 1.15 | R&L (2D-GIST) |
| gij1709802  | FBgn0002787 | 790.44  | 1578.86 | 1578.86 | 0.01  | 0 | 35  | 0.019    | 1 | K.LHQNDIAINELVR.R                            | 0.87 | F&H (2D-GIST) |
| gij1709802  | FBgn0002787 | 788.93  | 1575.84 | 1575.84 | 0.01  | 0 | 38  | 0.01     | 1 | K.LHQNDIAINELVR.R                            | 0.99 | R&L (2D-GIST) |
| gij24762618 | FBgn0002787 | 667.06  | 1998.15 | 1998.14 | 0.01  | 0 | 67  | 2.70E-06 | 1 | K.VIVHPLVLLSVVDHFNRM                         | 1.21 | F&H (2D-GIST) |
| gij24762618 | FBgn0002787 | 907.11  | 2718.31 | 2718.31 | 0     | 0 | 68  | 7.10E-06 | 1 | K.TFEHVPSEIGAEAAEEVGVHLLR.D                  | 1.38 | F&H (2D-GIST) |
| gij24762618 | FBgn0002787 | 908.12  | 2721.34 | 2721.33 | 0.01  | 0 | 49  | 0.00048  | 1 | K.TFEHVPSEIGAEAAEEVGVHLLR.D                  | 0.89 | R&H (2D-GIST) |
| gij1709802  | FBgn0002787 | 668.06  | 2001.17 | 2001.16 | 0.01  | 0 | 67  | 2.90E-06 | 1 | K.VIVHPLVLLSVVDHFNRM                         | 1.08 | F&H (2D-GIST) |
| gij24762618 | FBgn0002787 | 667.06  | 1998.15 | 1998.14 | 0.01  | 0 | 68  | 1.90E-06 | 1 | K.VIVHPLVLLSVVDHFNRM                         | 0.92 | R&L (2D-GIST) |
| gij24762618 | FBgn0002787 | 907.11  | 2718.32 | 2718.31 | 0.01  | 0 | 67  | 8.90E-06 | 1 | K.TFEHVPSEIGAEAAEEVGVHLLR.D                  | 1.11 | R&L (2D-GIST) |
| gij1709802  | FBgn0002787 | 667.06  | 1998.15 | 1998.14 | 0.01  | 0 | 70  | 1.10E-06 | 1 | K.VIVHPLVLLSVVDHFNRM                         | 0.74 | R&L (2D-GIST) |
| gij14424436 | FBgn0002921 | 660.87  | 1319.72 | 1319.71 | 0.01  | 0 | 49  | 0.001    | 1 | K.NMVPQFATVIR.E                              | 0.73 | F&H (2D-GIST) |
| gij14424436 | FBgn0002921 | 852.48  | 1702.94 | 1702.93 | 0.02  | 0 | 59  | 7.70E-05 | 1 | R.IAGLASGLDTGETPIAKE                         | 0.89 | F&H (2D-GIST) |
| gij14424436 | FBgn0002921 | 869.94  | 1737.86 | 1737.84 | 0.02  | 0 | 50  | 0.0005   | 1 | K.FNTDDINFIDNLR.F                            | 0.96 | F&H (2D-GIST) |
| gij14424436 | FBgn0002921 | 736.42  | 1470.82 | 1470.8  | 0.02  | 0 | 44  | 0.0023   | 1 | K.VIMVTGDHPITAK.A                            | 1.03 | F&H (2D-GIST) |

|             |             |         |         |         |      |   |    |          |   |                                 |      |               |
|-------------|-------------|---------|---------|---------|------|---|----|----------|---|---------------------------------|------|---------------|
| gij14424436 | FBgn0002921 | 908.43  | 1814.85 | 1814.83 | 0.02 | 0 | 44 | 0.0013   | 1 | K.EAFNNAYMELGGLGER.V            | 1.08 | F&H (2D-GIST) |
| gij2944333  | FBgn0002921 | 980     | 1957.98 | 1957.96 | 0.02 | 0 | 90 | 7.10E-08 | 1 | K.SVGIHSEGNETVEDIAQR.L          | 0.90 | F&H (2D-GIST) |
| gij2944333  | FBgn0002921 | 827.88  | 1653.75 | 1653.74 | 0.01 | 1 | 42 | 0.0014   | 1 | R.RNPGGWLEQETYY.-               | 0.95 | F&H (2D-GIST) |
| gij85070    | FBgn0002921 | 566.82  | 1131.62 | 1131.61 | 0.01 | 0 | 62 | 4.70E-05 | 1 | K.LIIVEGCQR.M                   | 0.62 | R&H (2D-GIST) |
| gij85070    | FBgn0002921 | 829.39  | 1656.77 | 1656.76 | 0.01 | 1 | 53 | 0.00011  | 1 | R.RNPGGWLEQETYY.-               | 0.86 | R&H (2D-GIST) |
| gij85070    | FBgn0002921 | 660.87  | 1319.72 | 1319.71 | 0.01 | 0 | 47 | 0.0015   | 1 | K.NMVPQFATVIR.E                 | 1.07 | R&H (2D-GIST) |
| gij17861704 | FBgn0002921 | 979.99  | 1957.97 | 1957.96 | 0.01 | 0 | 95 | 1.90E-08 | 1 | K.SVGIHSEGNETVEDIAQR.L          | 0.70 | R&L (2D-GIST) |
| gij17861704 | FBgn0002921 | 906.92  | 1811.83 | 1811.81 | 0.02 | 0 | 68 | 5.20E-06 | 1 | K.EAFNNAYMELGGLGER.V            | 0.84 | R&L (2D-GIST) |
| gij17861704 | FBgn0002921 | 868.42  | 1734.83 | 1734.82 | 0.01 | 0 | 53 | 0.00022  | 1 | K.FNTDDINFIDNLR.F               | 0.84 | R&L (2D-GIST) |
| gij17861704 | FBgn0002921 | 849.46  | 1696.9  | 1696.89 | 0.01 | 0 | 91 | 4.60E-08 | 1 | R.IAGLASGLDTGETPIAK.E           | 0.85 | R&L (2D-GIST) |
| gij17861704 | FBgn0002921 | 733.4   | 1464.78 | 1464.76 | 0.01 | 0 | 62 | 4.20E-05 | 1 | K.VIMVTGDHPITAK.A               | 1.08 | R&L (2D-GIST) |
| gij14424436 | FBgn0002921 | 924.93  | 1847.84 | 1847.84 | 0    | 0 | 45 | 0.00047  | 1 | K.YQVSIHETEDTNDPR.Y             | 0.90 | F&H (2D-GIST) |
| gij14424436 | FBgn0002921 | 765.37  | 1528.72 | 1528.71 | 0    | 0 | 88 | 6.10E-08 | 1 | K.GVVISCGDHTVMGR.I              | 0.89 | F&H (2D-GIST) |
| gij85070    | FBgn0002921 | 924.93  | 1847.84 | 1847.84 | 0.01 | 0 | 32 | 0.014    | 1 | K.YQVSIHETEDTNDPR.Y             | 0.66 | R&H (2D-GIST) |
| gij85070    | FBgn0002921 | 766.87  | 1531.74 | 1531.73 | 0    | 0 | 92 | 2.30E-08 | 1 | K.GVVISCGDHTVMGR.I              | 0.89 | R&H (2D-GIST) |
| gij2944333  | FBgn0002921 | 532.8   | 1063.58 | 1063.58 | 0    | 0 | 52 | 0.00032  | 1 | K.AAVVHGAELR.D                  | 0.81 | F&H (2D-GIST) |
| gij2944333  | FBgn0002921 | 775.37  | 1548.73 | 1548.73 | 0    | 0 | 28 | 0.063    | 1 | R.FQTHPENGLSHAK.A               | 0.85 | F&H (2D-GIST) |
| gij2944333  | FBgn0002921 | 589.3   | 1176.59 | 1176.59 | 0    | 0 | 50 | 0.00069  | 1 | R.YHTEIVFAR.T                   | 0.92 | F&H (2D-GIST) |
| gij85070    | FBgn0002921 | 766.88  | 1531.74 | 1531.73 | 0    | 0 | 88 | 5.80E-08 | 1 | K.GVVISCGDHTVMGR.I              | 0.90 | R&H (2D-GIST) |
| gij85070    | FBgn0002921 | 924.93  | 1847.84 | 1847.84 | 0.01 | 0 | 28 | 0.032    | 1 | K.YQVSIHETEDTNDPR.Y             | 1.04 | R&H (2D-GIST) |
| gij2944333  | FBgn0002921 | 532.8   | 1063.58 | 1063.58 | 0    | 0 | 65 | 1.60E-05 | 1 | K.AAVVHGAELR.D                  | 1.03 | R&L (2D-GIST) |
| gij2944333  | FBgn0002921 | 589.3   | 1176.59 | 1176.59 | 0    | 0 | 53 | 0.00031  | 1 | R.YHTEIVFAR.T                   | 1.04 | R&L (2D-GIST) |
| gij2944333  | FBgn0002921 | 775.38  | 1548.74 | 1548.73 | 0.01 | 0 | 44 | 0.0018   | 1 | R.FQTHPENGLSHAK.A               | 1.55 | R&L (2D-GIST) |
| gij85070    | FBgn0002921 | 590.81  | 1179.61 | 1179.61 | 0    | 0 | 36 | 0.015    | 1 | R.YHTEIVFAR.T                   | 0.87 | R&H (2D-GIST) |
| gij84873    | FBgn0002938 | 654.9   | 1307.79 | 1307.79 | 0    | 0 | 64 | 3.70E-06 | 1 | K.VLAAILNIGNIR.F                | 0.70 | F&H (2D-GIST) |
| gij84873    | FBgn0002938 | 585.35  | 1168.69 | 1168.68 | 0.01 | 0 | 81 | 3.50E-07 | 1 | K.ALGVLDTVIAR.Q                 | 0.82 | F&H (2D-GIST) |
| gij84873    | FBgn0002938 | 654.83  | 1307.65 | 1307.65 | 0.01 | 0 | 44 | 0.0019   | 1 | R.SDIAEMLELSR.D                 | 0.66 | R&H (2D-GIST) |
| gij84873    | FBgn0002938 | 517.81  | 1033.61 | 1033.6  | 0.01 | 0 | 49 | 0.00078  | 1 | R.LVDFIINR.I                    | 0.93 | R&H (2D-GIST) |
| gij84873    | FBgn0002938 | 1062.05 | 2122.08 | 2122.05 | 0.03 | 0 | 38 | 0.0087   | 1 | K.SYALNTLSAGCISQVNNLR.T         | 0.83 | R&L (2D-GIST) |
| gij84873    | FBgn0002938 | 585.35  | 1168.69 | 1168.68 | 0    | 0 | 66 | 1.00E-05 | 1 | K.ALGVLDTVIAR.Q                 | 0.91 | R&L (2D-GIST) |
| gij84873    | FBgn0002938 | 1125.04 | 2248.07 | 2248.07 | 0    | 1 | 90 | 3.80E-08 | 1 | K.AGNLTMPFEAVQHKDESER.K         | 0.59 | R&H (2D-GIST) |
| gij21428862 | FBgn0002938 | 1002.85 | 3005.52 | 3005.5  | 0.03 | 0 | 90 | 3.70E-08 | 1 | R.ADVWALGITTIELADGKPPFADMHPTR.A | 0.88 | R&L (2D-GIST) |
| gij84873    | FBgn0002938 | 1099.97 | 2197.93 | 2197.93 | 0    | 1 | 78 | 8.00E-08 | 1 | R.RYQDDEGYNSSSGNYGVS.R.K        | 1.15 | F&H (2D-GIST) |
| gij84873    | FBgn0002938 | 733.66  | 2197.95 | 2197.93 | 0.01 | 1 | 44 | 0.0002   | 1 | R.RYQDDEGYNSSSGNYGVS.R.K        | 1.24 | F&H (2D-GIST) |
| gij84873    | FBgn0002938 | 814.42  | 1626.83 | 1626.83 | 0    | 0 | 74 | 2.70E-06 | 1 | K.MLSQANLGVHVFVR.C              | 0.68 | F&H (2D-GIST) |
| gij84873    | FBgn0002938 | 659.37  | 1316.73 | 1316.72 | 0.01 | 0 | 70 | 6.00E-06 | 1 | K.SIFQVLLHYR.A                  | 0.79 | F&H (2D-GIST) |
| gij84873    | FBgn0002938 | 641.33  | 1280.65 | 1280.65 | 0    | 1 | 34 | 0.024    | 1 | R.YREFENILR.D                   | 0.83 | F&H (2D-GIST) |
| gij84873    | FBgn0002938 | 815.93  | 1629.85 | 1629.85 | 0.01 | 0 | 69 | 9.20E-06 | 1 | K.MLSQANLGVHVFVR.C              | 0.85 | R&H (2D-GIST) |
| gij84873    | FBgn0002938 | 1310.13 | 2618.24 | 2618.21 | 0.03 | 0 | 54 | 0.00014  | 1 | R.AVFGDTNAIHDMFGFEFCNR.N        | 0.85 | R&H (2D-GIST) |

|             |             |         |         |         |       |   |     |          |   |                                    |      |               |
|-------------|-------------|---------|---------|---------|-------|---|-----|----------|---|------------------------------------|------|---------------|
| gij84873    | FBgn0002938 | 1089.55 | 2177.09 | 2177.07 | 0.02  | 0 | 87  | 1.30E-07 | 1 | R.FQDFVNLSQQVHIYNQR.M              | 0.75 | R&L (2D-GIST) |
| gij84872    | FBgn0002938 | 1150.19 | 3447.55 | 3447.56 | -0.02 | 0 | 43  | 0.00051  | 1 | K.NAENRPMVMVEMVEHPFLTELIENEDEM.R.S | 0.94 | F&H (2D-GIST) |
| gij84872    | FBgn0002938 | 1061.82 | 3182.45 | 3182.44 | 0.01  | 1 | 43  | 0.0009   | 1 | R.LREYDEEHIDISETPSEAEEMFLEAR.M     | 3.19 | F&H (2D-GIST) |
| gij84872    | FBgn0002938 | 888.76  | 2663.26 | 2663.24 | 0.02  | 0 | 44  | 0.0019   | 1 | R.SENQPHIFSVADIAYQDMLHKK.E         | 0.81 | F&H (2D-GIST) |
| gij84872    | FBgn0002938 | 642.84  | 1283.67 | 1283.67 | 0     | 1 | 29  | 0.07     | 1 | R.YREFENILR.D                      | 0.75 | R&H (2D-GIST) |
| gij84872    | FBgn0002938 | 642.84  | 1283.67 | 1283.67 | 0     | 1 | 29  | 0.07     | 1 | R.YREFENILR.D                      | 0.75 | R&H (2D-GIST) |
| gij84872    | FBgn0002938 | 1150.2  | 3447.59 | 3447.56 | 0.02  | 0 | 57  | 3.40E-05 | 1 | K.NAENRPMVMVEMVEHPFLTELIENEDEM.R.S | 0.92 | R&H (2D-GIST) |
| gij84873    | FBgn0002938 | 888.76  | 2663.26 | 2663.24 | 0.01  | 0 | 59  | 5.50E-05 | 1 | R.SENQPHIFSVADIAYQDMLHKK.E         | 0.82 | R&L (2D-GIST) |
| gij84873    | FBgn0002938 | 587.65  | 1759.91 | 1759.91 | 0     | 1 | 37  | 0.012    | 1 | K.KHTATEISVAHYTGR.I                | 0.61 | F&H (2D-GIST) |
| gij84872    | FBgn0002938 | 749.34  | 2244.99 | 2244.99 | 0     | 0 | 39  | 0.0022   | 1 | K.IQHYDEEHQVSIEEEYR.T              | 1.02 | F&H (2D-GIST) |
| gij84872    | FBgn0002938 | 1123.51 | 2245    | 2244.99 | 0     | 0 | 117 | 4.20E-11 | 1 | K.IQHYDEEHQVSIEEEYR.T              | 1.27 | F&H (2D-GIST) |
| gij84872    | FBgn0002938 | 750.35  | 2248.01 | 2248.01 | 0     | 0 | 64  | 5.90E-06 | 1 | K.IQHYDEEHQVSIEEEYR.T              | 0.84 | R&H (2D-GIST) |
| gij84872    | FBgn0002938 | 1150.2  | 3447.57 | 3447.56 | 0.01  | 0 | 50  | 0.00013  | 1 | K.NAENRPMVMVEMVEHPFLTELIENEDEM.R.S | 0.87 | R&H (2D-GIST) |
| gij84872    | FBgn0002938 | 1123.51 | 2245    | 2244.99 | 0.01  | 0 | 123 | 1.10E-11 | 1 | K.IQHYDEEHQVSIEEEYR.T              | 0.74 | R&L (2D-GIST) |
| gij24651916 | FBgn0003074 | 889.43  | 1776.84 | 1776.83 | 0.01  | 0 | 63  | 1.50E-05 | 1 | R.DAMFSGQHINITENR.A                | 0.93 | R&H (2D-GIST) |
| gij24651916 | FBgn0003074 | 889.42  | 1776.84 | 1776.83 | 0.01  | 0 | 64  | 1.00E-05 | 1 | R.DAMFSGQHINITENR.A                | 0.74 | R&H (2D-GIST) |
| gij24651916 | FBgn0003074 | 753.4   | 2257.17 | 2257.15 | 0.02  | 0 | 32  | 0.037    | 1 | K.GLHSHFVSNIDGTHLAEVLK.K           | 1.06 | F&H (2D-GIST) |
| gij24651916 | FBgn0003074 | 1129.59 | 2257.17 | 2257.15 | 0.02  | 0 | 79  | 7.20E-07 | 1 | K.GLHSHFVSNIDGTHLAEVLK.K           | 0.75 | R&L (2D-GIST) |
| gij24651916 | FBgn0003074 | 623.65  | 1867.93 | 1867.92 | 0     | 0 | 43  | 0.0029   | 1 | K.AETHALLPYDQYLHR.F                | 1.06 | R&L (2D-GIST) |
| gij279529   | FBgn0003075 | 847.44  | 1692.87 | 1692.86 | 0.01  | 0 | 53  | 0.00028  | 1 | K.SVVLMSHLGRPDGKN.N                | 0.71 | F&H (2D-GIST) |
| gij279529   | FBgn0003075 | 838.91  | 1675.8  | 1675.8  | 0.01  | 0 | 86  | 1.40E-07 | 1 | K.LGDVYVNDAFGTAHR.A                | 0.93 | F&H (2D-GIST) |
| gij384291   | FBgn0003075 | 840.42  | 1678.82 | 1678.81 | 0.01  | 0 | 72  | 3.20E-06 | 1 | K.LGDVYVNDAFGTAHR.A                | 1.02 | R&H (2D-GIST) |
| gij384291   | FBgn0003075 | 850.46  | 1698.91 | 1698.9  | 0.01  | 0 | 52  | 0.00034  | 1 | K.SVVLMSHLGRPDGKN.N                | 1.23 | R&H (2D-GIST) |
| gij279529   | FBgn0003075 | 838.91  | 1675.8  | 1675.8  | 0     | 0 | 68  | 7.00E-06 | 1 | K.LGDVYVNDAFGTAHR.A                | 1.03 | R&L (2D-GIST) |
| gij279529   | FBgn0003075 | 847.44  | 1692.87 | 1692.86 | 0.01  | 0 | 28  | 0.095    | 1 | K.SVVLMSHLGRPDGKN.N                | 1.15 | R&L (2D-GIST) |
| gij10959    | FBgn0003149 | 1130.59 | 2259.17 | 2259.15 | 0.02  | 0 | 46  | 0.0014   | 1 | R.TFVTTSTVPGSQVYIQUETTR.T          | 0.69 | F&H (2D-GIST) |
| gij10959    | FBgn0003149 | 1050.53 | 2099.05 | 2099.03 | 0.02  | 0 | 80  | 7.20E-07 | 1 | K.QSLQLTELQAHYEDVQR.Q              | 0.72 | F&H (2D-GIST) |
| gij10959    | FBgn0003149 | 719.35  | 1436.68 | 1436.68 | 0     | 0 | 69  | 8.60E-06 | 1 | R.TVELQYEEAASR.I                   | 0.75 | F&H (2D-GIST) |
| gij10959    | FBgn0003149 | 700.69  | 2099.05 | 2099.03 | 0.02  | 0 | 28  | 0.09     | 1 | K.QSLQLTELQAHYEDVQR.Q              | 0.78 | F&H (2D-GIST) |
| gij10959    | FBgn0003149 | 671.36  | 1340.7  | 1340.69 | 0.01  | 0 | 69  | 9.20E-06 | 1 | R.LAGLNGELEEV.R.S                  | 0.78 | F&H (2D-GIST) |
| gij10959    | FBgn0003149 | 1048.55 | 2095.08 | 2095.08 | 0     | 0 | 86  | 1.50E-07 | 1 | R.SLLESSLHQVEIELDSVR.N             | 0.84 | F&H (2D-GIST) |
| gij10959    | FBgn0003149 | 670.38  | 1338.75 | 1338.74 | 0.01  | 0 | 68  | 6.90E-06 | 1 | K.NLILLQDALDK.S                    | 1.07 | F&H (2D-GIST) |
| gij10959    | FBgn0003149 | 1130.59 | 2259.17 | 2259.15 | 0.03  | 0 | 49  | 0.00079  | 1 | R.TFVTTSTVPGSQVYIQUETTR.T          | 0.91 | R&H (2D-GIST) |
| gij10959    | FBgn0003149 | 673.4   | 1344.78 | 1344.78 | 0.01  | 0 | 79  | 5.90E-07 | 1 | K.NLILLQDALDK.S                    | 1.01 | R&H (2D-GIST) |
| gij10959    | FBgn0003149 | 637.84  | 1273.67 | 1273.66 | 0.01  | 0 | 30  | 0.071    | 1 | R.LLQDDLEVER.E                     | 1.21 | R&H (2D-GIST) |
| gij10959    | FBgn0003149 | 753.41  | 1504.8  | 1504.79 | 0.01  | 1 | 39  | 0.0086   | 1 | R.LAEKDEEIEAIR.K                   | 1.27 | R&H (2D-GIST) |
| gij10959    | FBgn0003149 | 719.35  | 1436.69 | 1436.68 | 0.01  | 0 | 71  | 5.00E-06 | 1 | R.TVELQYEEAASR.I                   | 0.73 | R&L (2D-GIST) |
| gij10959    | FBgn0003149 | 671.36  | 1340.7  | 1340.69 | 0.01  | 0 | 65  | 2.00E-05 | 1 | R.LAGLNGELEEV.R.S                  | 1.13 | R&L (2D-GIST) |
| gij10959    | FBgn0003149 | 1050.07 | 2098.12 | 2098.1  | 0.02  | 0 | 68  | 1.40E-05 | 1 | R.SLLESSLHQVEIELDSVR.N             | 1.01 | F&H (2D-GIST) |

|             |             |         |         |         |       |   |     |          |   |                         |      |               |
|-------------|-------------|---------|---------|---------|-------|---|-----|----------|---|-------------------------|------|---------------|
| gij17861600 | FBgn0003149 | 622.66  | 1864.96 | 1864.95 | 0     | 1 | 34  | 0.023    | 1 | K.SRLDETIILYETSQR.D     | 0.68 | F&H (2D-GIST) |
| gij17861600 | FBgn0003149 | 610.28  | 1827.8  | 1827.8  | 0     | 0 | 51  | 0.00012  | 1 | R.LEEAEGGAEHQFEANR.K    | 0.68 | F&H (2D-GIST) |
| gij10959    | FBgn0003149 | 933.49  | 1864.96 | 1864.95 | 0.01  | 1 | 84  | 2.70E-07 | 1 | K.SRLDETIILYETSQR.D     | 0.86 | F&H (2D-GIST) |
| gij10959    | FBgn0003149 | 914.91  | 1827.81 | 1827.8  | 0     | 0 | 103 | 7.30E-10 | 1 | R.LEEAEGGAEHQFEANR.K    | 0.87 | F&H (2D-GIST) |
| gij17861600 | FBgn0003149 | 699.37  | 2095.1  | 2095.08 | 0.02  | 0 | 49  | 0.00063  | 1 | R.SLLESSLHQVEIELDSVR.N  | 1.17 | F&H (2D-GIST) |
| gij17861600 | FBgn0003149 | 1050.06 | 2098.1  | 2098.1  | 0.01  | 0 | 85  | 2.80E-07 | 1 | R.SLLESSLHQVEIELDSVR.N  | 0.77 | R&H (2D-GIST) |
| gij17861600 | FBgn0003149 | 1052.03 | 2102.05 | 2102.05 | 0.01  | 0 | 80  | 5.60E-07 | 1 | K.QSLQLTELQAHYEDVQR.Q   | 0.81 | R&H (2D-GIST) |
| gij17861600 | FBgn0003149 | 916.42  | 1830.82 | 1830.82 | 0     | 0 | 100 | 1.20E-09 | 1 | R.LEEAEGGAEHQFEANR.K    | 0.99 | R&H (2D-GIST) |
| gij17861600 | FBgn0003149 | 1138.6  | 2275.18 | 2275.17 | 0.01  | 1 | 69  | 7.80E-06 | 1 | K.KQSLQLTELQAHYEDVQR.Q  | 1.03 | R&H (2D-GIST) |
| gij10959    | FBgn0003149 | 699.37  | 2095.09 | 2095.08 | 0.01  | 0 | 52  | 0.00036  | 1 | R.SLLESSLHQVEIELDSVR.N  | 0.98 | R&L (2D-GIST) |
| gij10959    | FBgn0003149 | 798.91  | 1595.8  | 1595.8  | 0     | 1 | 38  | 0.0077   | 1 | K.RTVELQYEEAASR.I       | 0.71 | F&H (2D-GIST) |
| gij24661116 | FBgn0003149 | 878.46  | 1754.91 | 1754.9  | 0     | 2 | 73  | 3.50E-06 | 1 | R.IRDLELELEEEKR.R       | 0.64 | F&H (2D-GIST) |
| gij24661116 | FBgn0003149 | 828.43  | 1654.86 | 1654.85 | 0     | 2 | 62  | 4.70E-05 | 1 | R.RLAEKDEEIEAIR.K       | 0.69 | F&H (2D-GIST) |
| gij24661116 | FBgn0003149 | 749.41  | 1496.8  | 1496.79 | 0     | 1 | 45  | 0.0018   | 1 | R.RLAGLNGELEEVR.S       | 0.80 | F&H (2D-GIST) |
| gij24661116 | FBgn0003149 | 896.45  | 1790.88 | 1790.88 | 0     | 2 | 39  | 0.0071   | 1 | R.RLENERDELTAAYK.E      | 0.83 | F&H (2D-GIST) |
| gij24661116 | FBgn0003149 | 597.33  | 1192.65 | 1192.65 | 0     | 0 | 58  | 6.70E-05 | 1 | R.LHELELELR.R           | 0.83 | F&H (2D-GIST) |
| gij10959    | FBgn0003149 | 598.84  | 1195.67 | 1195.66 | 0     | 0 | 53  | 0.00031  | 1 | R.LHELELELR.R           | 1.07 | R&H (2D-GIST) |
| gij10959    | FBgn0003149 | 798.91  | 1595.81 | 1595.8  | 0.01  | 1 | 40  | 0.0053   | 1 | K.RTVELQYEEAASR.I       | 1.10 | R&H (2D-GIST) |
| gij10959    | FBgn0003149 | 899.47  | 1796.92 | 1796.92 | 0     | 2 | 46  | 0.0016   | 1 | R.RLENERDELTAAYK.E      | 1.20 | R&H (2D-GIST) |
| gij24661116 | FBgn0003149 | 1048.54 | 2095.07 | 2095.08 | -0.01 | 0 | 87  | 1.00E-07 | 1 | R.SLLESSLHQVEIELDSVR.N  | 1.03 | R&L (2D-GIST) |
| gij24661116 | FBgn0003149 | 914.91  | 1827.81 | 1827.8  | 0.01  | 0 | 104 | 7.30E-10 | 1 | R.LEEAEGGAEHQFEANR.K    | 1.11 | R&L (2D-GIST) |
| gij24661116 | FBgn0003149 | 749.41  | 1496.8  | 1496.79 | 0     | 1 | 45  | 0.0019   | 1 | R.RLAGLNGELEEVR.S       | 1.12 | R&L (2D-GIST) |
| gij24661116 | FBgn0003149 | 828.44  | 1654.86 | 1654.85 | 0.01  | 2 | 68  | 1.20E-05 | 1 | R.RLAEKDEEIEAIR.K       | 1.19 | R&L (2D-GIST) |
| gij24661116 | FBgn0003149 | 933.49  | 1864.96 | 1864.95 | 0.01  | 1 | 63  | 3.50E-05 | 1 | K.SRLDETIILYETSQR.D     | 1.28 | R&L (2D-GIST) |
| gij24661116 | FBgn0003149 | 878.47  | 1754.92 | 1754.9  | 0.01  | 2 | 72  | 4.20E-06 | 1 | R.IRDLELELEEEKR.R       | 1.45 | R&L (2D-GIST) |
| gij10959    | FBgn0003149 | 1050.05 | 2098.08 | 2098.1  | -0.02 | 0 | 60  | 8.10E-05 | 1 | R.SLLESSLHQVEIELDSVR.N  | 0.93 | R&H (2D-GIST) |
| gij10959    | FBgn0003149 | 598.84  | 1195.67 | 1195.66 | 0.01  | 0 | 51  | 0.0004   | 1 | R.LHELELELR.R           | 1.43 | R&H (2D-GIST) |
| gij10959    | FBgn0003149 | 751.4   | 2251.19 | 2251.18 | 0.01  | 1 | 47  | 0.00088  | 1 | R.RSLLESSLHQVEIELDSVR.N | 0.93 | F&H (2D-GIST) |
| gij10959    | FBgn0003149 | 751.4   | 2251.19 | 2251.18 | 0.01  | 1 | 43  | 0.0025   | 1 | R.RSLLESSLHQVEIELDSVR.N | 0.99 | R&L (2D-GIST) |
| gij10959    | FBgn0003149 | 450.59  | 1348.75 | 1348.75 | 0     | 1 | 35  | 0.012    | 1 | R.RLHELELELR.R          | 0.89 | F&H (2D-GIST) |
| gij10959    | FBgn0003149 | 451.6   | 1351.77 | 1351.77 | 0     | 1 | 45  | 0.0017   | 1 | R.RLHELELELR.R          | 1.23 | R&H (2D-GIST) |
| gij10959    | FBgn0003149 | 675.38  | 1348.75 | 1348.75 | 0     | 1 | 53  | 0.00017  | 1 | R.RLHELELELR.R          | 1.11 | R&L (2D-GIST) |
| gij130837   | FBgn0003151 | 1053.59 | 2105.17 | 2105.16 | 0.01  | 0 | 85  | 9.40E-08 | 1 | K.IIPIDDLGISIAGLTADAR.V | 0.70 | R&H (2D-GIST) |
| gij130837   | FBgn0003151 | 853.95  | 1705.88 | 1705.88 | 0     | 0 | 35  | 0.021    | 1 | R.RPYGVGLLVAGYDER.G     | 0.77 | F&H (2D-GIST) |
| gij130837   | FBgn0003151 | 855.46  | 1708.91 | 1708.9  | 0.01  | 0 | 28  | 0.098    | 1 | R.RPYGVGLLVAGYDER.G     | 1.27 | R&H (2D-GIST) |
| gij1079084  | FBgn0003162 | 628.84  | 1255.67 | 1255.67 | 0.01  | 0 | 44  | 0.0022   | 1 | K.TVTSTMLGVFR.D         | 1.05 | F&H (2D-GIST) |
| gij1079084  | FBgn0003162 | 649.86  | 1297.71 | 1297.71 | 0.01  | 0 | 59  | 6.70E-05 | 1 | R.LLLGGLGENPDR.Q        | 1.07 | F&H (2D-GIST) |
| gij38455513 | FBgn0003162 | 767.41  | 1532.8  | 1532.78 | 0.02  | 1 | 69  | 9.10E-06 | 1 | K.TREEFLNLVNSK.-        | 1.00 | F&H (2D-GIST) |
| gij1079084  | FBgn0003162 | 770.42  | 1538.83 | 1538.82 | 0.01  | 1 | 67  | 1.50E-05 | 1 | K.TREEFLNLVNSK.-        | 1.05 | R&H (2D-GIST) |

|             |             |         |         |         |       |   |    |          |   |                              |      |               |
|-------------|-------------|---------|---------|---------|-------|---|----|----------|---|------------------------------|------|---------------|
| gij1079084  | FBgn0003162 | 628.84  | 1255.68 | 1255.67 | 0.01  | 0 | 35 | 0.019    | 1 | K.TVTSTMLGVFR.D              | 1.41 | R&H (2D-GIST) |
| gij5524669  | FBgn0003162 | 648.35  | 1294.7  | 1294.69 | 0.01  | 0 | 75 | 2.00E-06 | 1 | R.LLLGGLGENPDR.Q             | 1.23 | R&L (2D-GIST) |
| gij24656796 | FBgn0003162 | 696.33  | 2085.98 | 2085.97 | 0.01  | 0 | 34 | 0.017    | 1 | K.CTFHHDLELDHKPPTR.E         | 1.02 | R&L (2D-GIST) |
| gij3128475  | FBgn0003178 | 999.54  | 1997.06 | 1997.03 | 0.02  | 0 | 32 | 0.036    | 1 | K.AGKPVICATQMLESVK.K         | 0.90 | F&H (2D-GIST) |
| gij3128475  | FBgn0003178 | 990.52  | 1979.02 | 1979    | 0.03  | 0 | 87 | 1.30E-07 | 1 | R.GAGTIDASHAAAIAAVEAATK.A    | 0.71 | F&H (2D-GIST) |
| gij3128475  | FBgn0003178 | 805.93  | 1609.85 | 1609.84 | 0.01  | 0 | 31 | 0.041    | 1 | K.LGYEHPVAIALDTK.G           | 1.08 | F&H (2D-GIST) |
| gij3128475  | FBgn0003178 | 808.95  | 1615.88 | 1615.87 | 0.01  | 0 | 51 | 0.00047  | 1 | K.LGYEHPVAIALDTK.G           | 0.96 | R&H (2D-GIST) |
| gij3128475  | FBgn0003178 | 990.51  | 1979    | 1979    | 0.01  | 0 | 87 | 1.30E-07 | 1 | R.GAGTIDASHAAAIAAVEAATK.A    | 1.06 | R&L (2D-GIST) |
| gij3128475  | FBgn0003178 | 995.01  | 1988    | 1987.98 | 0.02  | 0 | 68 | 9.30E-06 | 1 | K.AGKPVICATQMLESVK.K         | 1.13 | R&L (2D-GIST) |
| gij27819773 | FBgn0003178 | 1036.03 | 2070.04 | 2070.04 | 0     | 0 | 63 | 2.70E-05 | 1 | K.EAEAALWHQNLFNLDLVR.G       | 0.70 | F&H (2D-GIST) |
| gij3128475  | FBgn0003178 | 1349.66 | 2697.31 | 2697.29 | 0.02  | 0 | 76 | 9.40E-07 | 1 | K.IENQQGMHNLDEIIEAGDGIMVAR.G | 0.76 | R&H (2D-GIST) |
| gij27819773 | FBgn0003178 | 899.1   | 2694.29 | 2694.27 | 0.01  | 0 | 66 | 9.70E-06 | 1 | K.IENQQGMHNLDEIIEAGDGIMVAR.G | 0.86 | R&L (2D-GIST) |
| gij27819773 | FBgn0003178 | 668.85  | 1335.69 | 1335.69 | 0     | 0 | 44 | 0.0025   | 1 | R.LQFDSVPVHVR.L              | 0.71 | F&H (2D-GIST) |
| gij3128475  | FBgn0003178 | 668.85  | 1335.69 | 1335.69 | 0     | 0 | 38 | 0.0098   | 1 | R.LQFDSVPVHVR.L              | 1.01 | R&L (2D-GIST) |
| gij24640697 | FBgn0003217 | 846.94  | 1691.86 | 1691.86 | 0     | 0 | 94 | 2.40E-08 | 1 | K.ELGQTALHIAAEQNR.R          | 0.74 | F&H (2D-GIST) |
| gij24640697 | FBgn0003217 | 984.48  | 1966.95 | 1966.94 | 0.01  | 0 | 96 | 1.50E-08 | 1 | K.LGQIEIESQCDEHVR.N          | 0.89 | F&H (2D-GIST) |
| gij729891   | FBgn0003217 | 985.99  | 1969.96 | 1969.96 | 0     | 0 | 85 | 1.30E-07 | 1 | K.LGQIEIESQCDEHVR.N          | 1.09 | R&H (2D-GIST) |
| gij729891   | FBgn0003217 | 535.3   | 1068.59 | 1068.59 | 0     | 0 | 37 | 0.008    | 1 | K.FQHLLNPR.Q                 | 0.72 | F&H (2D-GIST) |
| gij729891   | FBgn0003217 | 848.45  | 1694.88 | 1694.88 | 0     | 0 | 48 | 0.00089  | 1 | K.ELGQTALHIAAEQNR.R          | 0.76 | R&H (2D-GIST) |
| gij729891   | FBgn0003217 | 1182.01 | 2362    | 2361.98 | 0.02  | 0 | 69 | 7.30E-07 | 1 | K.VSQDWCFIDSCTAEHYFR.I       | 0.63 | R&L (2D-GIST) |
| gij729891   | FBgn0003217 | 533.79  | 1065.57 | 1065.57 | 0     | 0 | 30 | 0.037    | 1 | K.FQHLLNPR.Q                 | 0.93 | R&L (2D-GIST) |
| gij729891   | FBgn0003217 | 535.3   | 1068.59 | 1068.59 | 0     | 0 | 64 | 1.90E-05 | 1 | K.FQHLLNPR.Q                 | 0.97 | R&H (2D-GIST) |
| gij132748   | FBgn0003279 | 645.71  | 1934.12 | 1934.1  | 0.02  | 0 | 32 | 0.011    | 1 | R.YALVSAIAASGVPALVQSK.G      | 1.02 | F&H (2D-GIST) |
| gij132748   | FBgn0003279 | 965.05  | 1928.08 | 1928.06 | 0.02  | 0 | 75 | 9.50E-07 | 1 | R.YALVSAIAASGVPALVQSK.G      | 0.75 | F&H (2D-GIST) |
| gij132748   | FBgn0003279 | 965.05  | 1928.08 | 1928.06 | 0.02  | 0 | 87 | 6.20E-08 | 1 | R.YALVSAIAASGVPALVQSK.G      | 1.15 | R&L (2D-GIST) |
| gij132748   | FBgn0003279 | 850.95  | 1699.89 | 1699.89 | 0     | 2 | 48 | 0.0011   | 1 | R.RGPLVVYDKDEGLR.K           | 0.84 | F&H (2D-GIST) |
| gij132748   | FBgn0003279 | 853.97  | 1705.93 | 1705.93 | 0     | 2 | 35 | 0.018    | 1 | R.RGPLVVYDKDEGLR.K           | 0.87 | R&H (2D-GIST) |
| gij132748   | FBgn0003279 | 850.95  | 1699.89 | 1699.89 | 0.01  | 2 | 39 | 0.0089   | 1 | R.RGPLVVYDKDEGLR.K           | 0.94 | R&L (2D-GIST) |
| gij132748   | FBgn0003279 | 949.53  | 1897.05 | 1897.05 | 0     | 0 | 36 | 0.0097   | 1 | K.APIRPDVVNEVHQLLR.R         | 0.99 | F&H (2D-GIST) |
| gij132748   | FBgn0003279 | 634.37  | 1900.08 | 1900.07 | 0.01  | 0 | 42 | 0.0018   | 1 | K.APIRPDVVNEVHQLLR.R         | 0.87 | R&H (2D-GIST) |
| gij17646233 | FBgn0003349 | 851.46  | 1700.9  | 1700.89 | 0.01  | 0 | 61 | 5.50E-05 | 1 | R.AYHQLLAEINSLER.E           | 0.76 | F&H (2D-GIST) |
| gij17646233 | FBgn0003349 | 654.7   | 1961.08 | 1961.09 | -0.01 | 0 | 47 | 0.00095  | 1 | R.VSAAHSVLASASVAHVLAAR.T     | 1.04 | F&H (2D-GIST) |
| gij17646233 | FBgn0003349 | 653.7   | 1958.08 | 1958.07 | 0.01  | 0 | 49 | 0.00038  | 1 | R.VSAAHSVLASASVAHVLAAR.T     | 1.28 | R&L (2D-GIST) |
| gij103318   | FBgn0003371 | 702.82  | 1403.63 | 1403.63 | 0     | 0 | 49 | 0.00028  | 1 | K.ACAHPFFDEL.R.M             | 0.84 | F&H (2D-GIST) |
| gij10896    | FBgn0003371 | 702.82  | 1403.63 | 1403.63 | 0     | 0 | 43 | 0.0014   | 1 | K.ACAHPFFDEL.R.M             | 1.08 | R&L (2D-GIST) |
| gij6691827  | FBgn0003371 | 524.61  | 1570.81 | 1570.81 | 0     | 0 | 39 | 0.0077   | 1 | R.SLAYIHSLGICHR.D            | 0.66 | F&H (2D-GIST) |
| gij10896    | FBgn0003371 | 523.61  | 1567.8  | 1567.79 | 0     | 0 | 50 | 0.00059  | 1 | R.SLAYIHSLGICHR.D            | 1.10 | R&L (2D-GIST) |
| gij103144   | FBgn0003392 | 940.46  | 1878.91 | 1878.9  | 0.02  | 0 | 76 | 1.90E-06 | 1 | K.AMLQMIQQLQSDFER.T          | 1.08 | F&H (2D-GIST) |
| gij103144   | FBgn0003392 | 940.47  | 1878.92 | 1878.9  | 0.02  | 0 | 87 | 1.30E-07 | 1 | K.AMLQMIQQLQSDFER.T          | 0.86 | R&L (2D-GIST) |

|             |             |         |         |         |       |   |    |          |   |                                |      |               |
|-------------|-------------|---------|---------|---------|-------|---|----|----------|---|--------------------------------|------|---------------|
| gij103144   | FBgn0003392 | 671.37  | 1340.74 | 1340.73 | 0     | 1 | 67 | 1.00E-05 | 1 | R.KDIHQALAAER.K                | 0.92 | F&H (2D-GIST) |
| gij103144   | FBgn0003392 | 846.48  | 2536.41 | 2536.41 | 0     | 0 | 36 | 0.0036   | 1 | R.RPLILQLINGVTEYGEFLHIK.G      | 0.88 | R&L (2D-GIST) |
| gij103144   | FBgn0003392 | 599.81  | 1197.6  | 1197.6  | 0     | 0 | 51 | 0.0004   | 1 | K.FFLSHPSYR.H                  | 0.85 | F&H (2D-GIST) |
| gij103144   | FBgn0003392 | 683.35  | 1364.69 | 1364.69 | 0     | 1 | 60 | 6.50E-05 | 1 | R.KFFLSHPSYR.H                 | 0.87 | F&H (2D-GIST) |
| gij103144   | FBgn0003392 | 689.38  | 1376.75 | 1376.75 | 0     | 0 | 46 | 0.0011   | 1 | R.VLNQQLTNHIR.D                | 0.97 | F&H (2D-GIST) |
| gij103144   | FBgn0003392 | 690.89  | 1379.78 | 1379.77 | 0     | 0 | 46 | 0.0012   | 1 | R.VLNQQLTNHIR.D                | 0.97 | R&H (2D-GIST) |
| gij103144   | FBgn0003392 | 683.35  | 1364.69 | 1364.69 | 0     | 1 | 60 | 6.50E-05 | 1 | R.KFFLSHPSYR.H                 | 0.97 | R&L (2D-GIST) |
| gij103144   | FBgn0003392 | 598.3   | 1194.58 | 1194.58 | 0     | 0 | 51 | 0.00032  | 1 | K.FFLSHPSYR.H                  | 1.12 | R&L (2D-GIST) |
| gij476937   | FBgn0003423 | 1098.66 | 2195.31 | 2195.29 | 0.01  | 0 | 63 | 2.70E-06 | 1 | K.LTALGRPQLLLQLSEVIMR.T        | 0.64 | R&H (2D-GIST) |
| gij476937   | FBgn0003423 | 1003.47 | 2004.93 | 2004.93 | 0     | 0 | 36 | 0.0067   | 1 | K.YMEDMVGQGNVLTTHHK.T          | 0.76 | R&H (2D-GIST) |
| gij476937   | FBgn0003423 | 732.77  | 2195.3  | 2195.29 | 0.01  | 0 | 37 | 0.0014   | 1 | K.LTALGRPQLLLQLSEVIMR.T        | 0.89 | R&H (2D-GIST) |
| gij20908094 | FBgn0003432 | 878.98  | 1755.95 | 1755.95 | 0.01  | 0 | 31 | 0.042    | 1 | R.QRPVFTQPLQNIDR.I             | 0.63 | F&H (2D-GIST) |
| gij20908094 | FBgn0003432 | 903.95  | 1805.88 | 1805.88 | 0     | 0 | 62 | 3.50E-05 | 1 | R.SSIHETQHEEALTK.I             | 0.87 | F&H (2D-GIST) |
| gij20908094 | FBgn0003432 | 832.4   | 1662.79 | 1662.78 | 0     | 1 | 76 | 1.10E-06 | 1 | R.REEEETYITQAPR.F              | 0.96 | F&H (2D-GIST) |
| gij20908094 | FBgn0003432 | 843.43  | 1684.85 | 1684.84 | 0     | 0 | 76 | 1.60E-06 | 1 | K.SIYLESQHETALPR.L             | 1.04 | F&H (2D-GIST) |
| gij8250181  | FBgn0003432 | 1244.65 | 2487.28 | 2487.27 | 0.01  | 0 | 45 | 0.002    | 1 | K.VSGKPGIVYDSQLPAHQSIDR.I      | 0.70 | R&H (2D-GIST) |
| gij8250181  | FBgn0003432 | 906.97  | 1811.93 | 1811.92 | 0.01  | 0 | 31 | 0.052    | 1 | R.SSIHETQHEEALTK.I             | 0.93 | R&H (2D-GIST) |
| gij20908094 | FBgn0003432 | 833.91  | 1665.81 | 1665.8  | 0     | 1 | 65 | 1.40E-05 | 1 | R.REEEETYITQAPR.F              | 0.85 | F&H (2D-GIST) |
| gij20908094 | FBgn0003432 | 708.36  | 1414.71 | 1414.7  | 0     | 0 | 72 | 2.60E-06 | 1 | R.VAENQAVHFEAR.L               | 0.86 | F&H (2D-GIST) |
| gij20908094 | FBgn0003432 | 867.86  | 1733.71 | 1733.72 | -0.01 | 0 | 29 | 0.0037   | 1 | K.SSGYTADTEEHSSYR.K            | 1.07 | F&H (2D-GIST) |
| gij20908094 | FBgn0003432 | 693.35  | 1384.68 | 1384.67 | 0     | 0 | 83 | 2.80E-07 | 1 | K.LVEGQSAHFEAR.L               | 0.70 | F&H (2D-GIST) |
| gij20908094 | FBgn0003432 | 589.85  | 1177.69 | 1177.69 | 0     | 1 | 37 | 0.0037   | 1 | R.RLNLPRPTK.V                  | 0.78 | F&H (2D-GIST) |
| gij20908094 | FBgn0003432 | 801.42  | 1600.82 | 1600.82 | 0     | 0 | 53 | 0.00043  | 1 | R.SEFVDEVVNIRPR.F              | 0.88 | F&H (2D-GIST) |
| gij20908094 | FBgn0003432 | 555.27  | 1662.79 | 1662.78 | 0     | 1 | 28 | 0.07     | 1 | R.REEEETYITQAPR.F              | 1.05 | F&H (2D-GIST) |
| gij20908094 | FBgn0003432 | 693.35  | 1384.68 | 1384.67 | 0     | 0 | 71 | 5.30E-06 | 1 | K.LVEGQSAHFEAR.L               | 0.68 | R&L (2D-GIST) |
| gij20908094 | FBgn0003432 | 843.43  | 1684.85 | 1684.84 | 0.01  | 0 | 88 | 1.20E-07 | 1 | K.SIYLESQHETALPR.L             | 0.90 | R&L (2D-GIST) |
| gij20908094 | FBgn0003432 | 801.42  | 1600.83 | 1600.82 | 0.01  | 0 | 45 | 0.0023   | 1 | R.SEFVDEVVNIRPR.F              | 1.04 | R&L (2D-GIST) |
| gij20908094 | FBgn0003432 | 1051.09 | 2100.16 | 2100.16 | 0     | 0 | 34 | 0.016    | 1 | R.IHQLEKPLAPRPTPEPER.L         | 0.87 | F&H (2D-GIST) |
| gij20908094 | FBgn0003432 | 699.05  | 2094.13 | 2094.12 | 0     | 0 | 30 | 0.046    | 1 | R.IHQLEKPLAPRPTPEPER.L         | 0.82 | F&H (2D-GIST) |
| gij20908094 | FBgn0003432 | 1113.58 | 3337.71 | 3337.68 | 0.03  | 0 | 43 | 0.002    | 1 | R.LFEKPFTQLLTGPELWEGTHAHFEAR.V | 0.82 | F&H (2D-GIST) |
| gij20908094 | FBgn0003432 | 713.02  | 2136.05 | 2136.05 | 0     | 0 | 45 | 0.0015   | 1 | R.GLHNIETIEGTNVHLECR.L         | 1.05 | F&H (2D-GIST) |
| gij20908094 | FBgn0003432 | 586.65  | 1756.92 | 1756.92 | 0     | 1 | 50 | 0.00056  | 1 | R.RSEFVDEVVNIRPR.F             | 0.68 | F&H (2D-GIST) |
| gij20908094 | FBgn0003432 | 633     | 1895.99 | 1895.99 | 0     | 0 | 39 | 0.0075   | 1 | K.LHEGQHVLLAEQVEPR.A           | 0.73 | F&H (2D-GIST) |
| gij20908094 | FBgn0003432 | 609.98  | 1826.91 | 1826.91 | 0     | 0 | 64 | 2.70E-05 | 1 | R.HWLQAESLHPDSLPR.I            | 0.87 | F&H (2D-GIST) |
| gij20908094 | FBgn0003432 | 949     | 1895.99 | 1895.99 | 0     | 0 | 82 | 4.10E-07 | 1 | K.LHEGQHVLLAEQVEPR.A           | 0.90 | F&H (2D-GIST) |
| gij8250181  | FBgn0003432 | 915.97  | 1829.93 | 1829.93 | 0     | 0 | 60 | 5.90E-05 | 1 | R.HWLQAESLHPDSLPR.I            | 0.83 | R&H (2D-GIST) |
| gij8250181  | FBgn0003432 | 587.66  | 1759.95 | 1759.94 | 0.01  | 1 | 54 | 0.00025  | 1 | R.RSEFVDEVVNIRPR.F             | 1.01 | R&H (2D-GIST) |
| gij8250181  | FBgn0003432 | 950.51  | 1899.01 | 1899    | 0     | 0 | 90 | 7.50E-08 | 1 | K.LHEGQHVLLAEQVEPR.A           | 1.16 | R&H (2D-GIST) |
| gij8250181  | FBgn0003432 | 634.01  | 1899.01 | 1899    | 0     | 0 | 35 | 0.02     | 1 | K.LHEGQHVLLAEQVEPR.A           | 1.20 | R&H (2D-GIST) |

|             |             |         |         |         |       |   |     |          |   |                                  |      |               |
|-------------|-------------|---------|---------|---------|-------|---|-----|----------|---|----------------------------------|------|---------------|
| gil8250181  | FBgn0003432 | 618.99  | 1853.95 | 1853.94 | 0     | 0 | 34  | 0.027    | 1 | K.VEFHNGKPLSTGHR.F               | 1.53 | R&H (2D-GIST) |
| gil20908094 | FBgn0003432 | 609.98  | 1826.91 | 1826.91 | 0     | 0 | 54  | 0.00023  | 1 | R.HWLQAESLHPDSLPR.I              | 1.02 | R&L (2D-GIST) |
| gil20908094 | FBgn0003432 | 1113.57 | 3337.7  | 3337.68 | 0.02  | 0 | 60  | 4.10E-05 | 1 | R.LFEKPIFTQLLTGPSELWEGTHAHFEAR.V | 1.17 | R&L (2D-GIST) |
| gil20908094 | FBgn0003432 | 712.02  | 2133.03 | 2133.03 | 0     | 0 | 45  | 0.0019   | 1 | R.GLHNIETIEGTNVHLECR.L           | 1.46 | R&L (2D-GIST) |
| gil8647     | FBgn0003462 | 1066.52 | 2131.02 | 2131.02 | 0     | 0 | 100 | 3.70E-09 | 1 | R.TVVVHADADDLGQGGHELK.S          | 0.66 | F&H (2D-GIST) |
| gil6684465  | FBgn0003462 | 711.35  | 2131.03 | 2131.05 | -0.03 | 1 | 34  | 0.019    | 1 | R.TVVVHADADDLGKGGHELK.S          | 1.06 | F&H (2D-GIST) |
| gil6684465  | FBgn0003462 | 1069.54 | 2137.06 | 2137.09 | -0.03 | 1 | 68  | 8.30E-06 | 1 | R.TVVVHADADDLGKGGHELK.S          | 0.89 | R&H (2D-GIST) |
| gil6684465  | FBgn0003462 | 698.35  | 2092.04 | 2092.06 | -0.02 | 1 | 58  | 7.30E-05 | 1 | R.TVVVHADADDLGKGGHELK.S          | 1.44 | F&H (2D-GIST) |
| gil8647     | FBgn0003462 | 951.47  | 2851.4  | 2851.4  | 0     | 1 | 70  | 4.30E-06 | 1 | R.TVVVHADADDLGQGGHELKSTGNAGARI   | 1.94 | F&H (2D-GIST) |
| gil8647     | FBgn0003462 | 697.34  | 2089.01 | 2089.01 | 0     | 0 | 63  | 2.20E-05 | 1 | R.TVVVHADADDLGQGGHELK.S          | 1.44 | F&H (2D-GIST) |
| gil6684465  | FBgn0003462 | 949.46  | 2845.36 | 2845.4  | -0.04 | 2 | 79  | 4.40E-07 | 1 | R.TVVVHADADDLGKGGHELKSTGNAGARI   | 1.74 | R&L (2D-GIST) |
| gil8647     | FBgn0003462 | 1095.48 | 3283.42 | 3283.4  | 0.02  | 0 | 81  | 6.50E-08 | 1 | K.GLHGFHVHEFGDNTNGCMSGPHFNPYGK.E | 0.82 | R&L (2D-GIST) |
| gil17136504 | FBgn0003470 | 561.28  | 1680.83 | 1680.81 | 0.02  | 1 | 30  | 0.053    | 1 | K.KHDAFETDFTAHK.D                | 0.71 | F&H (2D-GIST) |
| gil103399   | FBgn0003470 | 751.41  | 1500.8  | 1500.79 | 0.01  | 0 | 63  | 3.40E-05 | 1 | R.LLNVISSGENMLK.D                | 0.64 | F&H (2D-GIST) |
| gil103399   | FBgn0003470 | 836.88  | 1671.75 | 1671.75 | 0     | 1 | 71  | 1.70E-06 | 1 | K.KHDAFETDFTAHK.D                | 0.67 | F&H (2D-GIST) |
| gil103399   | FBgn0003470 | 937.16  | 2808.45 | 2808.43 | 0.03  | 0 | 62  | 3.20E-05 | 1 | K.IAALQTVADQLIAQNHYASNLVDEK.R    | 0.82 | F&H (2D-GIST) |
| gil103399   | FBgn0003470 | 754.42  | 1506.83 | 1506.82 | 0.01  | 0 | 64  | 2.40E-05 | 1 | R.LLNVISSGENMLK.D                | 1.04 | R&H (2D-GIST) |
| gil103399   | FBgn0003470 | 937.16  | 2808.46 | 2808.43 | 0.03  | 0 | 77  | 9.20E-07 | 1 | K.IAALQTVADQLIAQNHYASNLVDEK.R    | 0.88 | R&L (2D-GIST) |
| gil103399   | FBgn0003470 | 883.98  | 1765.95 | 1765.95 | 0.01  | 0 | 87  | 1.20E-07 | 1 | K.QHLLDSLQVQQLFR.D               | 0.70 | F&H (2D-GIST) |
| gil103399   | FBgn0003470 | 816.08  | 2445.22 | 2445.21 | 0.01  | 1 | 47  | 0.001    | 1 | K.RLEAELGSHEPAIQAVQEAGEK.L       | 0.82 | F&H (2D-GIST) |
| gil103399   | FBgn0003470 | 646.36  | 1936.06 | 1936.05 | 0.01  | 1 | 43  | 0.0021   | 1 | R.KQHLLDSLQVQQLFR.D              | 0.83 | F&H (2D-GIST) |
| gil103399   | FBgn0003470 | 969.04  | 1936.06 | 1936.05 | 0.01  | 1 | 95  | 1.10E-08 | 1 | R.KQHLLDSLQVQQLFR.D              | 0.90 | F&H (2D-GIST) |
| gil103399   | FBgn0003470 | 858.93  | 1715.84 | 1715.83 | 0.01  | 0 | 52  | 0.00029  | 1 | K.LIDGQHYAADDVAQR.R              | 0.89 | R&H (2D-GIST) |
| gil103399   | FBgn0003470 | 1098.12 | 2194.23 | 2194.21 | 0.02  | 1 | 87  | 6.90E-08 | 1 | K.KIEELGALLEEHLILDNR.Y           | 1.01 | R&H (2D-GIST) |
| gil103399   | FBgn0003470 | 841.42  | 1680.82 | 1680.81 | 0.01  | 1 | 59  | 5.00E-05 | 1 | K.KHDAFETDFTAHK.D                | 1.02 | R&H (2D-GIST) |
| gil103399   | FBgn0003470 | 972.05  | 1942.09 | 1942.09 | 0     | 1 | 77  | 6.70E-07 | 1 | R.KQHLLDSLQVQQLFR.D              | 1.03 | R&H (2D-GIST) |
| gil103399   | FBgn0003470 | 1226.64 | 2451.27 | 2451.25 | 0.02  | 1 | 71  | 5.00E-06 | 1 | K.RLEAELGSHEPAIQAVQEAGEK.L       | 1.15 | R&H (2D-GIST) |
| gil17862818 | FBgn0003470 | 818.1   | 2451.26 | 2451.25 | 0.01  | 1 | 47  | 0.0012   | 1 | K.RLEAELGSHEPAIQAVQEAGEK.L       | 1.20 | R&H (2D-GIST) |
| gil103399   | FBgn0003470 | 730.4   | 2188.19 | 2188.17 | 0.01  | 1 | 67  | 7.30E-06 | 1 | K.KIEELGALLEEHLILDNR.Y           | 0.91 | R&L (2D-GIST) |
| gil103399   | FBgn0003470 | 794.38  | 1586.75 | 1586.75 | 0     | 0 | 85  | 9.00E-08 | 1 | K.HQAFEAELAAANADR.I              | 0.81 | F&H (2D-GIST) |
| gil103399   | FBgn0003470 | 767.42  | 1532.82 | 1532.82 | 0.01  | 0 | 70  | 7.10E-06 | 1 | R.LNEALTLHQFFR.D                 | 0.86 | F&H (2D-GIST) |
| gil103399   | FBgn0003470 | 771.89  | 1541.76 | 1541.76 | 0     | 2 | 56  | 0.00017  | 1 | K.RKEELNEAWQR.L                  | 0.72 | F&H (2D-GIST) |
| gil103399   | FBgn0003470 | 781.87  | 1561.72 | 1561.72 | 0     | 0 | 84  | 1.50E-07 | 1 | K.FIESGHFDADNIR.N                | 0.82 | F&H (2D-GIST) |
| gil103399   | FBgn0003470 | 556.8   | 1111.58 | 1111.58 | 0     | 0 | 54  | 0.00018  | 1 | K.LFGAHEIQR.F                    | 0.91 | F&H (2D-GIST) |
| gil103399   | FBgn0003470 | 782.86  | 1563.71 | 1563.71 | 0     | 0 | 59  | 3.00E-05 | 1 | K.HQNFHEHLENANK.S                | 0.96 | F&H (2D-GIST) |
| gil103399   | FBgn0003470 | 885.5   | 1768.98 | 1768.97 | 0.02  | 0 | 75  | 1.60E-06 | 1 | K.QHLLDSLQVQQLFR.D               | 0.72 | R&H (2D-GIST) |
| gil103399   | FBgn0003470 | 648.37  | 1942.1  | 1942.09 | 0.01  | 1 | 39  | 0.004    | 1 | R.KQHLLDSLQVQQLFR.D              | 1.16 | R&H (2D-GIST) |
| gil103399   | FBgn0003470 | 769.38  | 1536.75 | 1536.75 | 0.01  | 0 | 70  | 4.90E-06 | 1 | R.MQHNLEQQIQAR.N                 | 0.86 | R&L (2D-GIST) |
| gil103399   | FBgn0003470 | 781.87  | 1561.72 | 1561.72 | 0     | 0 | 84  | 1.50E-07 | 1 | K.FIESGHFDADNIR.N                | 0.96 | R&L (2D-GIST) |



|             |             |         |         |         |       |   |    |          |   |                              |      |               |
|-------------|-------------|---------|---------|---------|-------|---|----|----------|---|------------------------------|------|---------------|
| gil103399   | FBgn0003470 | 792.88  | 1583.74 | 1583.73 | 0.01  | 0 | 90 | 3.20E-08 | 1 | K.HQAFEAEELAAANADR.I         | 0.99 | R&L (2D-GIST) |
| gil103399   | FBgn0003470 | 969.04  | 1936.06 | 1936.05 | 0     | 1 | 79 | 4.50E-07 | 1 | R.KQHLLDLSLQVQQLFR.D         | 1.05 | R&L (2D-GIST) |
| gil103399   | FBgn0003470 | 765.91  | 1529.81 | 1529.8  | 0.01  | 0 | 69 | 8.90E-06 | 1 | R.LNEALTLHQFFR.D             | 1.08 | R&L (2D-GIST) |
| gil103399   | FBgn0003470 | 771.89  | 1541.76 | 1541.76 | 0.01  | 2 | 62 | 3.90E-05 | 1 | K.RKEELNEAWQR.L              | 1.10 | R&L (2D-GIST) |
| gil103399   | FBgn0003470 | 774.91  | 1547.8  | 1547.8  | 0     | 2 | 40 | 0.0058   | 1 | K.RKEELNEAWQR.L              | 0.97 | R&H (2D-GIST) |
| gil103399   | FBgn0003470 | 925.48  | 1848.95 | 1848.96 | -0.01 | 1 | 91 | 6.40E-08 | 1 | K.KHQLVEADIVAHEDR.I          | 0.53 | F&H (2D-GIST) |
| gil103399   | FBgn0003470 | 849.44  | 1696.86 | 1696.85 | 0.01  | 0 | 59 | 7.40E-05 | 1 | K.HANLFHQWLTETR.T            | 0.74 | F&H (2D-GIST) |
| gil103399   | FBgn0003470 | 797.38  | 1592.74 | 1592.74 | 0     | 0 | 65 | 1.10E-05 | 1 | R.LCSIHADHSDQIR.D            | 0.56 | F&H (2D-GIST) |
| gil103399   | FBgn0003470 | 907.47  | 1812.92 | 1812.92 | 0     | 1 | 57 | 0.00016  | 1 | K.KHQAVLAEINNHEAR.L          | 0.64 | F&H (2D-GIST) |
| gil103399   | FBgn0003470 | 531.92  | 1592.74 | 1592.74 | 0     | 0 | 39 | 0.0041   | 1 | R.LCSIHADHSDQIR.D            | 0.64 | F&H (2D-GIST) |
| gil103399   | FBgn0003470 | 548.61  | 1642.82 | 1642.82 | 0     | 0 | 58 | 0.00013  | 1 | K.HQAVLAEINNHEAR.L           | 0.74 | F&H (2D-GIST) |
| gil103399   | FBgn0003470 | 565.62  | 1693.84 | 1693.83 | 0     | 0 | 52 | 0.00036  | 1 | K.HANLFHQWLTETR.T            | 0.77 | F&H (2D-GIST) |
| gil103399   | FBgn0003470 | 558.61  | 1672.82 | 1672.82 | 0     | 0 | 64 | 2.30E-05 | 1 | K.HQLVEADIVAHEDR.I           | 0.80 | F&H (2D-GIST) |
| gil103399   | FBgn0003470 | 549.94  | 1646.79 | 1646.78 | 0     | 0 | 75 | 1.60E-06 | 1 | K.HALLEADVMAHQDR.I           | 0.83 | F&H (2D-GIST) |
| gil103399   | FBgn0003470 | 605.32  | 1812.93 | 1812.92 | 0     | 1 | 64 | 3.10E-05 | 1 | K.KHQAVLAEINNHEAR.L          | 0.85 | F&H (2D-GIST) |
| gil103399   | FBgn0003470 | 615.32  | 1842.92 | 1842.92 | 0     | 1 | 68 | 1.30E-05 | 1 | K.KHQLVEADIVAHEDR.I          | 0.97 | F&H (2D-GIST) |
| gil103399   | FBgn0003470 | 837.42  | 1672.82 | 1672.82 | 0     | 0 | 69 | 7.10E-06 | 1 | K.HQLVEADIVAHEDR.I           | 1.06 | F&H (2D-GIST) |
| gil103399   | FBgn0003470 | 838.92  | 1675.83 | 1675.84 | 0     | 0 | 61 | 4.00E-05 | 1 | K.HQLVEADIVAHEDR.I           | 0.71 | R&H (2D-GIST) |
| gil103399   | FBgn0003470 | 847.93  | 1693.84 | 1693.83 | 0     | 0 | 63 | 2.80E-05 | 1 | K.HANLFHQWLTETR.T            | 0.91 | R&L (2D-GIST) |
| gil17136504 | FBgn0003470 | 615.32  | 1842.93 | 1842.92 | 0     | 1 | 69 | 9.00E-06 | 1 | K.KHQLVEADIVAHEDR.I          | 0.95 | R&L (2D-GIST) |
| gil17136504 | FBgn0003470 | 549.94  | 1646.79 | 1646.78 | 0     | 0 | 73 | 2.20E-06 | 1 | K.HALLEADVMAHQDR.I           | 1.09 | R&L (2D-GIST) |
| gil17136504 | FBgn0003470 | 558.61  | 1672.82 | 1672.82 | 0     | 0 | 67 | 1.20E-05 | 1 | K.HQLVEADIVAHEDR.I           | 1.11 | R&L (2D-GIST) |
| gil17136504 | FBgn0003470 | 605.32  | 1812.93 | 1812.92 | 0.01  | 1 | 56 | 0.00017  | 1 | K.KHQAVLAEINNHEAR.L          | 1.18 | R&L (2D-GIST) |
| gil17136504 | FBgn0003470 | 565.62  | 1693.84 | 1693.83 | 0     | 0 | 44 | 0.0025   | 1 | K.HANLFHQWLTETR.T            | 1.19 | R&L (2D-GIST) |
| gil103399   | FBgn0003470 | 824.4   | 1646.79 | 1646.78 | 0.01  | 0 | 91 | 3.50E-08 | 1 | K.HALLEADVMAHQDR.I           | 1.34 | R&L (2D-GIST) |
| gil17136504 | FBgn0003470 | 606.64  | 1816.89 | 1816.89 | 0.01  | 1 | 61 | 5.10E-05 | 1 | K.KHALLEADVMAHQDR.I          | 1.74 | R&L (2D-GIST) |
| gil103399   | FBgn0003470 | 907.47  | 1812.92 | 1812.92 | 0     | 1 | 69 | 9.90E-06 | 1 | K.KHQAVLAEINNHEAR.L          | 1.76 | R&L (2D-GIST) |
| gil103399   | FBgn0003470 | 565.62  | 1693.83 | 1693.83 | 0     | 0 | 35 | 0.018    | 1 | K.HANLFHQWLTETR.T            | 0.74 | F&H (2D-GIST) |
| gil423777   | FBgn0003471 | 764.45  | 1526.88 | 1526.85 | 0.02  | 1 | 50 | 0.00047  | 1 | K.KFEALISDLTQK.W             | 0.97 | F&H (2D-GIST) |
| gil423777   | FBgn0003471 | 1068.54 | 2135.07 | 2135.04 | 0.03  | 1 | 70 | 6.70E-06 | 1 | K.KHENLEQSVEDYANTIR.Q        | 1.17 | F&H (2D-GIST) |
| gil423777   | FBgn0003471 | 764.44  | 1526.87 | 1526.85 | 0.01  | 1 | 38 | 0.0077   | 1 | K.KFEALISDLTQK.W             | 0.73 | R&H (2D-GIST) |
| gil423777   | FBgn0003471 | 921.47  | 1840.93 | 1840.92 | 0.01  | 1 | 57 | 9.70E-05 | 1 | K.KNQSLATEIDNHEPR.I          | 0.80 | F&H (2D-GIST) |
| gil423777   | FBgn0003471 | 815.39  | 1628.77 | 1628.78 | -0.01 | 0 | 77 | 8.30E-07 | 1 | K.VGSELITEGHFGADR.I          | 0.67 | F&H (2D-GIST) |
| gil423777   | FBgn0003471 | 1065.52 | 2129.02 | 2129    | 0.02  | 1 | 82 | 3.20E-07 | 1 | K.KHENLEQSVEDYANTIR.Q        | 0.70 | F&H (2D-GIST) |
| gil423777   | FBgn0003471 | 833.4   | 1664.78 | 1664.78 | 0.01  | 0 | 79 | 7.90E-07 | 1 | K.NQSLATEIDNHEPR.I           | 0.89 | F&H (2D-GIST) |
| gil423777   | FBgn0003471 | 804.43  | 1606.84 | 1606.83 | 0.01  | 0 | 77 | 1.10E-06 | 1 | K.HSLVEADINILGER.V           | 0.89 | F&H (2D-GIST) |
| gil423777   | FBgn0003471 | 1237.62 | 2473.22 | 2473.22 | 0     | 0 | 68 | 8.60E-06 | 1 | R.EVVAGSQELGQDFDHVTLTLLSER.F | 0.63 | R&H (2D-GIST) |
| gil423777   | FBgn0003471 | 816.91  | 1631.8  | 1631.8  | 0.01  | 0 | 82 | 3.20E-07 | 1 | K.VGSELITEGHFGADR.I          | 0.80 | R&H (2D-GIST) |
| gil423777   | FBgn0003471 | 1068.53 | 2135.05 | 2135.04 | 0.01  | 1 | 75 | 1.50E-06 | 1 | K.KHENLEQSVEDYANTIR.Q        | 0.82 | R&H (2D-GIST) |

|             |             |        |         |         |       |   |    |          |   |                            |      |               |
|-------------|-------------|--------|---------|---------|-------|---|----|----------|---|----------------------------|------|---------------|
| gii423777   | FBgn0003471 | 834.91 | 1667.81 | 1667.79 | 0.01  | 0 | 64 | 2.00E-05 | 1 | K.NQSLATEIDNHEPR.I         | 1.00 | R&H (2D-GIST) |
| gii423777   | FBgn0003471 | 921.47 | 1840.93 | 1840.92 | 0.01  | 1 | 65 | 1.60E-05 | 1 | K.KNQSLATEIDNHEPR.I        | 1.01 | R&H (2D-GIST) |
| gii17647191 | FBgn0003471 | 679.87 | 1357.73 | 1357.73 | 0     | 0 | 28 | 0.1      | 1 | K.HRPDLVQFEK.L             | 0.67 | F&H (2D-GIST) |
| gii423777   | FBgn0003471 | 816.91 | 1631.8  | 1631.8  | 0.01  | 0 | 64 | 2.00E-05 | 1 | K.VGSELITEGHFGADR.I        | 0.73 | R&H (2D-GIST) |
| gii423777   | FBgn0003471 | 679.87 | 1357.73 | 1357.73 | 0     | 0 | 36 | 0.019    | 1 | K.HRPDLVQFEK.L             | 1.13 | R&H (2D-GIST) |
| gii423777   | FBgn0003471 | 563.28 | 1124.55 | 1124.55 | 0     | 1 | 30 | 0.037    | 1 | K.HRFEGFDK.E               | 0.52 | F&H (2D-GIST) |
| gii423777   | FBgn0003471 | 931.42 | 1860.83 | 1860.83 | 0     | 1 | 50 | 0.00027  | 1 | K.RHEAFLTTMEANDDK.I        | 1.14 | R&L (2D-GIST) |
| gii423777   | FBgn0003471 | 658.67 | 1973    | 1973    | 0     | 0 | 29 | 0.065    | 1 | R.QLLHVEHPNSDEILER.Q       | 0.74 | F&H (2D-GIST) |
| gii85154    | FBgn0003676 | 872.96 | 1743.9  | 1743.89 | 0.01  | 0 | 34 | 0.022    | 1 | K.YISEHLTAPVDELGR.D        | 1.14 | F&H (2D-GIST) |
| gii85154    | FBgn0003676 | 872.96 | 1743.9  | 1743.89 | 0.01  | 0 | 37 | 0.011    | 1 | K.YISEHLTAPVDELGR.D        | 1.28 | R&H (2D-GIST) |
| gii85154    | FBgn0003676 | 644.86 | 1287.7  | 1287.7  | 0     | 0 | 33 | 0.035    | 1 | K.IHPTSIIISGYR.I           | 0.81 | F&H (2D-GIST) |
| gii24649029 | FBgn0003676 | 644.86 | 1287.71 | 1287.7  | 0.01  | 0 | 31 | 0.056    | 1 | K.IHPTSIIISGYR.I           | 1.01 | R&H (2D-GIST) |
| gii136075   | FBgn0003721 | 587.83 | 1173.65 | 1173.63 | 0.01  | 0 | 42 | 0.0048   | 1 | K.IVELEEEELR.V             | 0.74 | F&H (2D-GIST) |
| gii136075   | FBgn0003721 | 682.88 | 1363.74 | 1363.73 | 0.01  | 1 | 99 | 8.60E-09 | 1 | R.KLAMVEADLER.A            | 0.85 | F&H (2D-GIST) |
| gii85165    | FBgn0003721 | 586.32 | 1170.63 | 1170.61 | 0.02  | 0 | 61 | 6.80E-05 | 1 | K.IVELEEEELR.L             | 0.62 | F&H (2D-GIST) |
| gii85165    | FBgn0003721 | 650.35 | 1298.68 | 1298.67 | 0.01  | 0 | 61 | 6.20E-05 | 1 | R.IQLLEEDLER.S             | 0.71 | F&H (2D-GIST) |
| gii433475   | FBgn0003721 | 862.12 | 2583.35 | 2583.33 | 0.02  | 1 | 62 | 2.80E-05 | 1 | K.KIQTVENELDQTQEALTLVTGK.L | 0.84 | F&H (2D-GIST) |
| gii85165    | FBgn0003721 | 764.4  | 1526.78 | 1526.77 | 0.01  | 0 | 40 | 0.0062   | 1 | K.ALQNAESEVAALNR.R         | 1.01 | F&H (2D-GIST) |
| gii38047701 | FBgn0003721 | 596.31 | 1190.61 | 1190.6  | 0.01  | 0 | 43 | 0.0028   | 1 | K.LAMVEADLER.A             | 0.83 | R&H (2D-GIST) |
| gii38047701 | FBgn0003721 | 587.83 | 1173.64 | 1173.63 | 0.01  | 0 | 45 | 0.002    | 1 | K.IVELEEEELR.V             | 1.07 | R&H (2D-GIST) |
| gii85165    | FBgn0003721 | 679.86 | 1357.7  | 1357.69 | 0.01  | 1 | 86 | 1.80E-07 | 1 | R.KLAMVEADLER.A            | 0.92 | R&L (2D-GIST) |
| gii433475   | FBgn0003721 | 862.12 | 2583.34 | 2583.33 | 0.02  | 1 | 69 | 5.40E-06 | 1 | K.KIQTVENELDQTQEALTLVTGK.L | 1.00 | R&L (2D-GIST) |
| gii85165    | FBgn0003721 | 586.32 | 1170.62 | 1170.61 | 0     | 0 | 55 | 0.00025  | 1 | K.IVELEEEELR.L             | 1.07 | R&L (2D-GIST) |
| gii85165    | FBgn0003721 | 650.35 | 1298.68 | 1298.67 | 0.01  | 0 | 60 | 6.70E-05 | 1 | R.IQLLEEDLER.S             | 1.10 | R&L (2D-GIST) |
| gii85165    | FBgn0003721 | 764.4  | 1526.78 | 1526.77 | 0.01  | 0 | 66 | 1.70E-05 | 1 | K.ALQNAESEVAALNR.R         | 1.22 | R&L (2D-GIST) |
| gii85164    | FBgn0003721 | 814.42 | 1626.83 | 1626.82 | 0.01  | 1 | 69 | 8.60E-06 | 1 | K.EVDRLEDDLNRV.G           | 0.79 | F&H (2D-GIST) |
| gii85164    | FBgn0003721 | 815.93 | 1629.85 | 1629.84 | 0.01  | 1 | 43 | 0.0039   | 1 | K.EVDRLEDDLNRV.G           | 0.94 | R&H (2D-GIST) |
| gii85164    | FBgn0003721 | 728.4  | 1454.78 | 1454.77 | 0     | 1 | 50 | 0.00065  | 1 | R.RIQLLEEDLER.S            | 0.80 | F&H (2D-GIST) |
| gii85164    | FBgn0003721 | 758.38 | 1514.74 | 1514.73 | 0     | 1 | 91 | 4.50E-08 | 1 | R.REEAESEVAALNR.R          | 0.84 | F&H (2D-GIST) |
| gii85164    | FBgn0003721 | 833.86 | 1665.71 | 1665.71 | 0     | 2 | 52 | 6.60E-05 | 1 | K.YKDECEEFHKR.L            | 0.87 | F&H (2D-GIST) |
| gii45551896 | FBgn0003721 | 759.89 | 1517.76 | 1517.75 | 0.01  | 1 | 85 | 1.40E-07 | 1 | R.REEAESEVAALNR.R          | 1.01 | R&H (2D-GIST) |
| gii85165    | FBgn0003721 | 728.4  | 1454.78 | 1454.77 | 0     | 1 | 51 | 0.00063  | 1 | R.RIQLLEEDLER.S            | 1.03 | R&L (2D-GIST) |
| gii85164    | FBgn0003721 | 505.92 | 1514.74 | 1514.73 | 0.01  | 1 | 51 | 0.00053  | 1 | R.REEAESEVAALNR.R          | 1.11 | R&L (2D-GIST) |
| gii85164    | FBgn0003721 | 833.87 | 1665.72 | 1665.71 | 0.01  | 2 | 44 | 0.0005   | 1 | K.YKDECEEFHKR.L            | 1.48 | R&L (2D-GIST) |
| gii38047701 | FBgn0003721 | 728.4  | 1454.78 | 1454.77 | 0.01  | 1 | 41 | 0.0056   | 1 | R.RIQLLEEDLER.S            | 1.57 | R&L (2D-GIST) |
| gii3184326  | FBgn0003738 | 806.91 | 1611.8  | 1611.81 | -0.01 | 0 | 43 | 0.0024   | 1 | K.DIGADWVILGHSER.R         | 0.78 | F&H (2D-GIST) |
| gii45825129 | FBgn0003738 | 863.43 | 1724.85 | 1724.85 | 0     | 0 | 75 | 1.90E-06 | 1 | K.TATPDQAQEVHAFRLR.Q       | 0.93 | F&H (2D-GIST) |
| gii3184326  | FBgn0003738 | 864.94 | 1727.87 | 1727.87 | 0     | 0 | 65 | 1.50E-05 | 1 | K.TATPDQAQEVHAFRLR.Q       | 1.04 | R&H (2D-GIST) |
| gii103429   | FBgn0003738 | 805.4  | 1608.79 | 1608.79 | 0.01  | 0 | 80 | 4.80E-07 | 1 | K.DIGADWVILGHSER.R         | 0.86 | F&H (2D-GIST) |

|             |             |         |         |         |       |   |     |          |   |                             |      |               |
|-------------|-------------|---------|---------|---------|-------|---|-----|----------|---|-----------------------------|------|---------------|
| gii45825129 | FBgn0003738 | 863.44  | 1724.86 | 1724.85 | 0.01  | 0 | 63  | 2.70E-05 | 1 | K.TATPDQAQEVHAFRLR.Q        | 1.04 | R&L (2D-GIST) |
| gii45825129 | FBgn0003738 | 805.41  | 1608.8  | 1608.79 | 0.01  | 0 | 76  | 1.30E-06 | 1 | K.DIGADWVILGHSER.R          | 1.15 | R&L (2D-GIST) |
| gii17136564 | FBgn0003884 | 938.04  | 1874.07 | 1874.05 | 0.02  | 0 | 84  | 1.30E-07 | 1 | R.IHFPLVITYAPVISAEEK.A      | 1.02 | F&H (2D-GIST) |
| gii17136564 | FBgn0003884 | 557.31  | 1112.61 | 1112.61 | 0.01  | 0 | 49  | 0.0011   | 1 | K.EIVDLVLDR.I               | 1.01 | F&H (2D-GIST) |
| gii17136564 | FBgn0003884 | 558.82  | 1115.63 | 1115.63 | 0     | 0 | 61  | 4.10E-05 | 1 | K.EIVDLVLDR.I               | 0.76 | R&H (2D-GIST) |
| gii17136564 | FBgn0003884 | 935.02  | 1868.03 | 1868.01 | 0.02  | 0 | 86  | 1.10E-07 | 1 | R.IHFPLVITYAPVISAEEK.A      | 0.96 | R&L (2D-GIST) |
| gii17136564 | FBgn0003884 | 880.95  | 1759.89 | 1759.89 | 0     | 0 | 44  | 0.0033   | 1 | R.NLDIERPTYTNLNR.L          | 0.87 | F&H (2D-GIST) |
| gii17136564 | FBgn0003884 | 880.95  | 1759.89 | 1759.89 | 0     | 0 | 50  | 0.00075  | 1 | R.NLDIERPTYTNLNR.L          | 0.89 | F&H (2D-GIST) |
| gii17136564 | FBgn0003884 | 693.42  | 1384.82 | 1384.81 | 0.01  | 1 | 35  | 0.0089   | 1 | K.EIVDLVLRIR.K              | 1.02 | R&H (2D-GIST) |
| gii21428640 | FBgn0003890 | 1023.54 | 2045.06 | 2045.05 | 0.01  | 0 | 127 | 1.70E-11 | 1 | K.GHYTEGAELIDSVLEVLR.K      | 1.16 | F&H (2D-GIST) |
| gii21428640 | FBgn0003890 | 681.69  | 2042.04 | 2042.03 | 0.01  | 0 | 47  | 0.0016   | 1 | K.GHYTEGAELIDSVLEVLR.K      | 1.08 | F&H (2D-GIST) |
| gii21428640 | FBgn0003890 | 682.69  | 2045.06 | 2045.05 | 0.01  | 0 | 32  | 0.051    | 1 | K.GHYTEGAELIDSVLEVLR.K      | 0.95 | R&H (2D-GIST) |
| gii21428640 | FBgn0003890 | 1023.54 | 2045.07 | 2045.05 | 0.02  | 0 | 108 | 1.40E-09 | 1 | K.GHYTEGAELIDSVLEVLR.K      | 1.04 | R&H (2D-GIST) |
| gii21428640 | FBgn0003890 | 715.87  | 1429.73 | 1429.72 | 0.01  | 1 | 36  | 0.014    | 1 | K.RISEQFTAMFR.R             | 0.75 | F&H (2D-GIST) |
| gii21428640 | FBgn0003890 | 1022.03 | 2042.05 | 2042.03 | 0.01  | 0 | 110 | 9.10E-10 | 1 | K.GHYTEGAELIDSVLEVLR.K      | 0.63 | R&L (2D-GIST) |
| gii133897   | FBgn0003942 | 1076.44 | 2150.87 | 2150.86 | 0.01  | 0 | 84  | 6.60E-09 | 1 | R.ECPGENCGAGVFMAAHEDR.H     | 0.72 | R&H (2D-GIST) |
| gii133897   | FBgn0003942 | 768.99  | 2303.96 | 2303.95 | 0.01  | 1 | 43  | 0.00031  | 1 | R.RECPGENCGAGVFMAAHEDR.H    | 1.13 | R&L (2D-GIST) |
| gii85119    | FBgn0004066 | 1244.64 | 2487.26 | 2487.28 | -0.02 | 0 | 92  | 3.60E-08 | 1 | R.AVTIFSPDGHLLQVEYAQEA VR.K | 0.65 | R&H (2D-GIST) |
| gii85119    | FBgn0004066 | 601.28  | 1800.83 | 1800.83 | 0     | 1 | 40  | 0.0027   | 1 | K.SYREEEVANEHGAVK.L         | 0.87 | F&H (2D-GIST) |
| gii85119    | FBgn0004066 | 901.42  | 1800.83 | 1800.83 | 0     | 1 | 71  | 2.40E-06 | 1 | K.SYREEEVANEHGAVK.L         | 0.91 | F&H (2D-GIST) |
| gii85119    | FBgn0004066 | 901.42  | 1800.83 | 1800.83 | 0     | 1 | 58  | 4.70E-05 | 1 | K.SYREEEVANEHGAVK.L         | 1.33 | R&L (2D-GIST) |
| gii17945305 | FBgn0004117 | 751.86  | 1501.7  | 1501.7  | 0     | 0 | 66  | 9.00E-06 | 1 | K.LLEATQSA DENNR.M          | 0.52 | F&H (2D-GIST) |
| gii17945305 | FBgn0004117 | 787.91  | 1573.81 | 1573.79 | 0.01  | 0 | 69  | 9.00E-06 | 1 | K.LLTATESEVATQNR.K          | 0.82 | F&H (2D-GIST) |
| gii17945305 | FBgn0004117 | 609.31  | 1216.6  | 1216.59 | 0.01  | 0 | 46  | 0.0019   | 1 | K.IMELEELK.V                | 1.06 | F&H (2D-GIST) |
| gii38048155 | FBgn0004117 | 753.37  | 1504.72 | 1504.72 | 0     | 0 | 60  | 3.40E-05 | 1 | K.LLEATQSA DENNR.M          | 0.81 | R&H (2D-GIST) |
| gii17945305 | FBgn0004117 | 787.91  | 1573.81 | 1573.79 | 0.02  | 0 | 82  | 4.40E-07 | 1 | K.LLTATESEVATQNR.K          | 0.91 | R&L (2D-GIST) |
| gii45552923 | FBgn0004167 | 889.98  | 1777.95 | 1777.95 | 0     | 0 | 40  | 0.0085   | 1 | K.ALVAGQSLISQQHPER.E        | 0.67 | F&H (2D-GIST) |
| gii45552923 | FBgn0004167 | 772.92  | 1543.82 | 1543.82 | 0     | 0 | 46  | 0.0016   | 1 | R.LTQSHQLQEFLR.S            | 0.91 | F&H (2D-GIST) |
| gii45552923 | FBgn0004167 | 771.41  | 1540.81 | 1540.8  | 0.01  | 0 | 47  | 0.0016   | 1 | R.LTQSHQLQEFLR.S            | 1.23 | R&L (2D-GIST) |
| gii45552923 | FBgn0004167 | 533.27  | 1596.8  | 1596.79 | 0.01  | 0 | 30  | 0.049    | 1 | K.AWQILEYAEHHR.E            | 1.36 | F&H (2D-GIST) |
| gii85169    | FBgn0004169 | 749.91  | 1497.82 | 1497.81 | 0.01  | 0 | 76  | 1.50E-06 | 1 | R.IKPLAIEGFGEAK.L           | 0.62 | F&H (2D-GIST) |
| gii136401   | FBgn0004169 | 757.89  | 1513.76 | 1513.74 | 0.01  | 1 | 46  | 0.0013   | 1 | K.LETEKYDLEER.Q             | 0.90 | R&H (2D-GIST) |
| gii103432   | FBgn0004169 | 709.86  | 1417.7  | 1417.69 | 0.01  | 0 | 64  | 2.30E-05 | 1 | K.DAGVLGLSSAAMER.N          | 0.87 | R&L (2D-GIST) |
| gii85169    | FBgn0004169 | 749.92  | 1497.82 | 1497.81 | 0.01  | 0 | 68  | 9.80E-06 | 1 | R.IKPLAIEGFGEAK.L           | 1.17 | R&L (2D-GIST) |
| gii135085   | FBgn0004242 | 949.53  | 1897.05 | 1897.04 | 0.01  | 1 | 96  | 1.20E-08 | 1 | K.KIEHVGEVVTEVIAER.T        | 0.76 | R&H (2D-GIST) |
| gii135085   | FBgn0004242 | 622.8   | 1243.59 | 1243.58 | 0     | 0 | 55  | 5.00E-05 | 1 | R.HWSDMLASPR.R              | 1.08 | F&H (2D-GIST) |
| gii28416379 | FBgn0004242 | 621.29  | 1240.57 | 1240.57 | 0     | 0 | 45  | 0.00064  | 1 | R.HWSDMLASPR.R              | 1.05 | R&L (2D-GIST) |
| gii19550069 | FBgn0004363 | 612.28  | 1222.55 | 1222.55 | 0     | 0 | 54  | 0.0001   | 1 | K.YQLDDASVR.A               | 0.70 | F&H (2D-GIST) |
| gii19550069 | FBgn0004363 | 1017.96 | 2033.91 | 2033.89 | 0.02  | 0 | 74  | 7.80E-07 | 1 | K.TSSGIEFNTAGHSNQESGK.V     | 0.97 | R&L (2D-GIST) |

|             |             |         |         |         |       |   |     |          |   |                                  |      |               |
|-------------|-------------|---------|---------|---------|-------|---|-----|----------|---|----------------------------------|------|---------------|
| gij19550069 | FBgn0004363 | 612.28  | 1222.55 | 1222.55 | 0     | 0 | 47  | 0.00048  | 1 | K.YQLDDDDASVR.A                  | 1.00 | R&L (2D-GIST) |
| gij1526609  | FBgn0004363 | 1206.6  | 2411.18 | 2411.16 | 0.02  | 0 | 101 | 3.90E-09 | 1 | K.DFVLHTAVNDGQEFGSIFQR.T         | 1.09 | R&H (2D-GIST) |
| gij1526609  | FBgn0004363 | 803.72  | 2408.15 | 2408.14 | 0.01  | 0 | 55  | 0.00017  | 1 | K.DFVLHTAVNDGQEFGSIFQR.T         | 0.78 | R&L (2D-GIST) |
| gij1228974  | FBgn0004397 | 883.44  | 1764.86 | 1764.86 | 0     | 0 | 48  | 0.00071  | 1 | K.WLQHPEINDGGLGER.A              | 1.00 | R&H (2D-GIST) |
| gij1228974  | FBgn0004397 | 803.45  | 1604.88 | 1604.87 | 0.01  | 0 | 29  | 0.086    | 1 | K.ELTHQVHSEILVR.C                | 0.79 | F&H (2D-GIST) |
| gij1228974  | FBgn0004397 | 801.94  | 1601.86 | 1601.85 | 0     | 0 | 46  | 0.0018   | 1 | K.ELTHQVHSEILVR.C                | 1.10 | R&L (2D-GIST) |
| gij1228974  | FBgn0004397 | 534.96  | 1601.85 | 1601.85 | 0     | 0 | 32  | 0.052    | 1 | K.ELTHQVHSEILVR.C                | 1.43 | R&L (2D-GIST) |
| gij17864514 | FBgn0004401 | 798.89  | 1595.77 | 1595.77 | 0     | 0 | 72  | 2.90E-06 | 1 | K.FFDTEVTAEIHSR.T                | 1.06 | F&H (2D-GIST) |
| gij17864514 | FBgn0004401 | 859.9   | 1717.78 | 1717.78 | 0     | 0 | 41  | 0.002    | 1 | K.HMWDANSFENHIK.G                | 0.83 | F&H (2D-GIST) |
| gij17864514 | FBgn0004401 | 798.9   | 1595.78 | 1595.77 | 0.01  | 0 | 71  | 3.70E-06 | 1 | K.FFDTEVTAEIHSR.T                | 1.21 | F&H (2D-GIST) |
| gij17864514 | FBgn0004401 | 798.9   | 1595.79 | 1595.77 | 0.02  | 0 | 56  | 0.00012  | 1 | K.FFDTEVTAEIHSR.T                | 1.54 | R&H (2D-GIST) |
| gij17864514 | FBgn0004401 | 856.88  | 1711.75 | 1711.74 | 0     | 0 | 55  | 5.20E-05 | 1 | K.HMWDANSFENHIK.G                | 1.11 | R&L (2D-GIST) |
| gij5305433  | FBgn0004507 | 726.42  | 1450.83 | 1450.82 | 0.01  | 0 | 50  | 0.00028  | 1 | R.WPVSLLESILPR.H                 | 0.64 | F&H (2D-GIST) |
| gij5305433  | FBgn0004507 | 727.93  | 1453.85 | 1453.84 | 0.01  | 0 | 48  | 0.00047  | 1 | R.WPVSLLESILPR.H                 | 0.77 | R&H (2D-GIST) |
| gij5305433  | FBgn0004507 | 871.45  | 1740.89 | 1740.88 | 0     | 0 | 32  | 0.038    | 1 | K.ARPEFMPLPVNFYGR.V              | 0.59 | F&H (2D-GIST) |
| gij5305433  | FBgn0004507 | 951.96  | 1901.9  | 1901.89 | 0     | 0 | 82  | 2.40E-07 | 1 | R.SCA YTNHTVLPEALER.W            | 0.70 | F&H (2D-GIST) |
| gij5305433  | FBgn0004507 | 721.72  | 2162.15 | 2162.16 | -0.01 | 0 | 54  | 0.00022  | 1 | K.VAIQLNDTHPSLAPELMR.I           | 0.34 | R&H (2D-GIST) |
| gij5305433  | FBgn0004507 | 1082.09 | 2162.17 | 2162.16 | 0.02  | 0 | 75  | 1.30E-06 | 1 | K.VAIQLNDTHPSLAPELMR.I           | 0.62 | R&H (2D-GIST) |
| gij5305433  | FBgn0004507 | 1296.14 | 2590.27 | 2590.25 | 0.02  | 0 | 48  | 0.00083  | 1 | R.VFAMPYDNPPIPGYNNHVNTLR.L       | 0.63 | R&H (2D-GIST) |
| gij5305433  | FBgn0004507 | 953.47  | 1904.92 | 1904.91 | 0.01  | 0 | 73  | 1.90E-06 | 1 | R.SCA YTNHTVLPEALER.W            | 0.79 | R&H (2D-GIST) |
| gij5305433  | FBgn0004507 | 869.94  | 1737.87 | 1737.87 | 0     | 0 | 51  | 0.00045  | 1 | K.ARPEFMPLPVNFYGR.V              | 0.48 | F&H (2D-GIST) |
| gij5305433  | FBgn0004507 | 953.46  | 1904.91 | 1904.91 | 0     | 0 | 63  | 1.60E-05 | 1 | R.SCA YTNHTVLPEALER.W            | 0.67 | R&H (2D-GIST) |
| gij5305433  | FBgn0004507 | 1103.91 | 3308.72 | 3308.68 | 0.04  | 1 | 44  | 0.0015   | 1 | R.NTFDHFDPDKVAIQLNDTHPSLAPELMR.I | 0.64 | F&H (2D-GIST) |
| gij5305433  | FBgn0004507 | 922.17  | 2763.49 | 2763.49 | 0.01  | 0 | 86  | 7.60E-08 | 1 | R.INMAHLSIVGSHAVNGVAAIHSQILK.D   | 0.61 | F&H (2D-GIST) |
| gij5305433  | FBgn0004507 | 1103.9  | 3308.68 | 3308.68 | 0.01  | 1 | 36  | 0.01     | 1 | R.NTFDHFDPDKVAIQLNDTHPSLAPELMR.I | 0.52 | R&H (2D-GIST) |
| gij5305433  | FBgn0004507 | 922.17  | 2763.49 | 2763.49 | 0.01  | 0 | 77  | 6.00E-07 | 1 | R.INMAHLSIVGSHAVNGVAAIHSQILK.D   | 0.69 | R&L (2D-GIST) |
| gij118314   | FBgn0004516 | 952.52  | 1903.03 | 1903.02 | 0.01  | 0 | 68  | 1.00E-05 | 1 | R.ALPLQLIEDCATTLK.Y              | 0.76 | F&H (2D-GIST) |
| gij118314   | FBgn0004516 | 949.51  | 1897    | 1896.99 | 0.02  | 0 | 72  | 4.20E-06 | 1 | R.ALPLQLIEDCATTLK.Y              | 0.99 | R&L (2D-GIST) |
| gij118314   | FBgn0004516 | 729.36  | 1456.7  | 1456.69 | 0.01  | 0 | 41  | 0.0031   | 1 | K.VLDFHHPEDMK.R                  | 1.03 | R&H (2D-GIST) |
| gij118314   | FBgn0004516 | 1280.09 | 2558.16 | 2558.15 | 0.02  | 0 | 52  | 0.00014  | 1 | K.SCAAVCGLGTDHCIVVPSDEHGK.M      | 1.37 | R&H (2D-GIST) |
| gij118314   | FBgn0004516 | 729.36  | 1456.7  | 1456.69 | 0.01  | 0 | 40  | 0.0042   | 1 | K.VLDFHHPEDMK.R                  | 1.10 | R&H (2D-GIST) |
| gij280603   | FBgn0004551 | 646.36  | 1290.71 | 1290.69 | 0.02  | 0 | 83  | 2.80E-07 | 1 | K.ILALTGQYGTGR.D                 | 0.76 | F&H (2D-GIST) |
| gij280603   | FBgn0004551 | 779.45  | 1556.88 | 1556.87 | 0.01  | 0 | 52  | 0.00025  | 1 | K.FSIPVVLLDETLLK.F               | 0.96 | F&H (2D-GIST) |
| gij280603   | FBgn0004551 | 782.47  | 1562.92 | 1562.91 | 0.01  | 0 | 60  | 2.90E-05 | 1 | K.FSIPVVLLDETLLK.F               | 0.73 | R&H (2D-GIST) |
| gij280603   | FBgn0004551 | 646.36  | 1290.7  | 1290.69 | 0.01  | 0 | 87  | 1.20E-07 | 1 | K.ILALTGQYGTGR.D                 | 0.81 | R&L (2D-GIST) |
| gij280603   | FBgn0004551 | 623.84  | 1245.67 | 1245.67 | 0     | 0 | 34  | 0.028    | 1 | R.ITHIYSTTLR.I                   | 0.80 | F&H (2D-GIST) |
| gij280603   | FBgn0004551 | 1216.58 | 2431.14 | 2431.13 | 0.01  | 0 | 50  | 0.00032  | 1 | K.LSYWQLTHHLSCLGGGDEFK.G         | 0.96 | F&H (2D-GIST) |
| gij280603   | FBgn0004551 | 813.4   | 2437.18 | 2437.16 | 0.02  | 0 | 30  | 0.037    | 1 | K.LSYWQLTHHLSCLGGGDEFK.G         | 0.85 | R&H (2D-GIST) |
| gij280603   | FBgn0004551 | 1216.58 | 2431.14 | 2431.13 | 0.02  | 0 | 76  | 9.10E-07 | 1 | K.LSYWQLTHHLSCLGGGDEFK.G         | 0.91 | R&L (2D-GIST) |

|             |             |         |         |         |       |   |    |          |   |                           |      |               |
|-------------|-------------|---------|---------|---------|-------|---|----|----------|---|---------------------------|------|---------------|
| gij479373   | FBgn0004574 | 947.52  | 1893.03 | 1893.02 | 0.01  | 0 | 84 | 2.30E-07 | 1 | R.HEHIAVVSTQVTQNLK.K      | 1.28 | F&H (2D-GIST) |
| gij479373   | FBgn0004574 | 844.87  | 1687.73 | 1687.73 | 0     | 0 | 44 | 0.00051  | 1 | K.YSTHLHLAEDCMK.S         | 0.86 | F&H (2D-GIST) |
| gij479373   | FBgn0004574 | 947.52  | 1893.03 | 1893.02 | 0.01  | 0 | 82 | 3.60E-07 | 1 | R.HEHIAVVSTQVTQNLK.K      | 0.99 | R&H (2D-GIST) |
| gij479373   | FBgn0004574 | 844.88  | 1687.74 | 1687.73 | 0.01  | 0 | 43 | 0.00073  | 1 | K.YSTHLHLAEDCMK.S         | 1.00 | R&L (2D-GIST) |
| gij479373   | FBgn0004574 | 522.77  | 1043.52 | 1043.52 | 0     | 0 | 28 | 0.14     | 1 | R.HFPFLEGR.A              | 1.12 | R&L (2D-GIST) |
| gij103301   | FBgn0004611 | 921.47  | 1840.92 | 1840.91 | 0.01  | 0 | 50 | 0.00049  | 1 | K.AAQQVALSASHEDGGVTR.S    | 1.30 | R&H (2D-GIST) |
| gij103301   | FBgn0004611 | 770.39  | 1538.76 | 1538.75 | 0     | 0 | 48 | 0.00082  | 1 | K.VTGEVMHQLQEAR.R         | 1.23 | R&L (2D-GIST) |
| gij24583049 | FBgn0004868 | 763.36  | 1524.7  | 1524.68 | 0.01  | 0 | 57 | 6.20E-05 | 1 | K.EALASDLMGMEFK.R         | 0.91 | R&L (2D-GIST) |
| gij480358   | FBgn0004868 | 526.32  | 1050.62 | 1050.62 | 0     | 0 | 35 | 0.0068   | 1 | K.LLIHTGVTR.Y             | 0.85 | F&H (2D-GIST) |
| gij480358   | FBgn0004868 | 816.92  | 1631.82 | 1631.81 | 0.01  | 0 | 81 | 5.10E-07 | 1 | K.NTQDFTGHALALFR.D        | 0.95 | F&H (2D-GIST) |
| gij24583049 | FBgn0004868 | 816.91  | 1631.81 | 1631.81 | 0.01  | 0 | 79 | 7.30E-07 | 1 | K.NTQDFTGHALALFR.D        | 1.46 | R&L (2D-GIST) |
| gij290211   | FBgn0004873 | 733.38  | 2197.1  | 2197.08 | 0.02  | 0 | 28 | 0.098    | 1 | K.ISAGPQSHILEGVTWDEASR.L  | 0.68 | F&H (2D-GIST) |
| gij384212   | FBgn0004873 | 1099.56 | 2197.11 | 2197.08 | 0.03  | 0 | 65 | 1.80E-05 | 1 | K.ISAGPQSHILEGVTWDEASR.L  | 1.20 | F&H (2D-GIST) |
| gij290211   | FBgn0004873 | 1099.56 | 2197.1  | 2197.08 | 0.02  | 0 | 94 | 2.00E-08 | 1 | K.ISAGPQSHILEGVTWDEASR.L  | 0.80 | R&H (2D-GIST) |
| gij290211   | FBgn0004873 | 783.39  | 1564.76 | 1564.76 | 0     | 0 | 63 | 2.50E-05 | 1 | K.WVAEGSPHSTHPVR.I        | 0.75 | F&H (2D-GIST) |
| gij290211   | FBgn0004873 | 672.32  | 1342.63 | 1342.63 | 0     | 0 | 28 | 0.069    | 1 | K.ARPADIEQDMR.E           | 0.91 | F&H (2D-GIST) |
| gij290211   | FBgn0004873 | 567.3   | 1132.59 | 1132.59 | 0     | 1 | 31 | 0.077    | 1 | K.LFREELER.I              | 1.30 | F&H (2D-GIST) |
| gij290211   | FBgn0004873 | 567.3   | 1132.59 | 1132.59 | 0     | 1 | 34 | 0.032    | 1 | K.LFREELER.I              | 0.97 | R&L (2D-GIST) |
| gij28574296 | FBgn0004888 | 1023.08 | 2044.15 | 2044.13 | 0.02  | 1 | 54 | 0.00016  | 1 | K.KGGTQHLGLPVFASVAEAK.K   | 0.87 | F&H (2D-GIST) |
| gij28574296 | FBgn0004888 | 1023.08 | 2044.15 | 2044.13 | 0.02  | 1 | 53 | 0.00018  | 1 | K.KGGTQHLGLPVFASVAEAK.K   | 0.99 | R&H (2D-GIST) |
| gij28574296 | FBgn0004888 | 633.71  | 1898.11 | 1898.1  | 0.01  | 1 | 31 | 0.017    | 1 | K.AKPVVSVFIAGVVSAPPGR.R.M | 1.02 | F&H (2D-GIST) |
| gij28574296 | FBgn0004888 | 947.04  | 1892.08 | 1892.06 | 0.01  | 1 | 47 | 0.00034  | 1 | K.AKPVVSVFIAGVVSAPPGR.R.M | 0.91 | F&H (2D-GIST) |
| gij38048587 | FBgn0004888 | 593.82  | 1185.63 | 1185.63 | 0     | 0 | 37 | 0.021    | 1 | K.IGIMPGHIHK.R            | 0.93 | F&H (2D-GIST) |
| gij28574296 | FBgn0004888 | 950.06  | 1898.11 | 1898.1  | 0.01  | 1 | 51 | 0.00016  | 1 | K.AKPVVSVFIAGVVSAPPGR.R.M | 0.89 | R&H (2D-GIST) |
| gij28574296 | FBgn0004888 | 593.82  | 1185.63 | 1185.63 | 0     | 0 | 45 | 0.0032   | 1 | K.IGIMPGHIHK.R            | 0.89 | R&L (2D-GIST) |
| gij112683   | FBgn0004907 | 796.37  | 1590.73 | 1590.74 | -0.01 | 0 | 76 | 6.70E-07 | 1 | K.SVTETGVELSNEER.N        | 0.70 | F&H (2D-GIST) |
| gij112683   | FBgn0004907 | 604.3   | 1206.59 | 1206.59 | 0     | 0 | 65 | 1.50E-05 | 1 | R.YLAEVATGDAR.N           | 0.71 | F&H (2D-GIST) |
| gij112683   | FBgn0004907 | 605.82  | 1209.62 | 1209.61 | 0.01  | 0 | 56 | 0.00015  | 1 | R.YLAEVATGDAR.N           | 1.11 | R&H (2D-GIST) |
| gij112683   | FBgn0004907 | 796.38  | 1590.75 | 1590.74 | 0.01  | 0 | 64 | 1.60E-05 | 1 | K.SVTETGVELSNEER.N        | 0.96 | R&L (2D-GIST) |
| gij17647889 | FBgn0005533 | 535.29  | 1068.57 | 1068.57 | 0     | 0 | 42 | 0.0028   | 1 | K.LLDFHNIR.G              | 0.85 | F&H (2D-GIST) |
| gij17647889 | FBgn0005533 | 630.33  | 1258.65 | 1258.65 | 0     | 0 | 93 | 4.00E-08 | 1 | K.IAGYVTHLMGR.L           | 0.87 | F&H (2D-GIST) |
| gij17647889 | FBgn0005533 | 664.85  | 1327.69 | 1327.69 | 0     | 1 | 43 | 0.0034   | 1 | R.LTLDFHTNKR.I            | 0.96 | F&H (2D-GIST) |
| gij17647889 | FBgn0005533 | 631.84  | 1261.67 | 1261.67 | 0     | 0 | 94 | 2.90E-08 | 1 | K.IAGYVTHLMGR.L           | 1.04 | R&H (2D-GIST) |
| gij17647889 | FBgn0005533 | 536.8   | 1071.59 | 1071.59 | 0     | 0 | 41 | 0.0042   | 1 | K.LLDFHNIR.G              | 1.12 | R&H (2D-GIST) |
| gij17647889 | FBgn0005533 | 664.85  | 1327.69 | 1327.69 | 0     | 1 | 31 | 0.064    | 1 | R.LTLDFHTNKR.I            | 0.94 | R&L (2D-GIST) |
| gij477886   | FBgn0005632 | 639.36  | 1276.7  | 1276.7  | 0     | 0 | 33 | 0.026    | 1 | K.VLLHLLPCDR.Q            | 1.35 | R&L (2D-GIST) |
| gij6013477  | FBgn0005632 | 619.3   | 1854.89 | 1854.89 | 0     | 0 | 48 | 0.00058  | 1 | R.GPVMWEYDALSHHIR.S       | 1.34 | R&H (2D-GIST) |
| gij547969   | FBgn0005634 | 805.91  | 1609.8  | 1609.79 | 0.01  | 1 | 65 | 1.50E-05 | 1 | K.AKHEATITELEER.L         | 1.12 | F&H (2D-GIST) |
| gij547969   | FBgn0005634 | 987.47  | 1972.93 | 1972.92 | 0     | 0 | 61 | 2.50E-05 | 1 | K.SLEEETVNHEGVLADMR.H     | 0.92 | R&H (2D-GIST) |

|             |             |         |         |         |       |   |     |          |   |                                               |      |               |
|-------------|-------------|---------|---------|---------|-------|---|-----|----------|---|-----------------------------------------------|------|---------------|
| gi 547969   | FBgn0005634 | 786.44  | 1570.87 | 1570.86 | 0.01  | 0 | 61  | 4.80E-05 | 1 | K.IAHLGLSVTDMTR.A                             | 0.93 | R&H (2D-GIST) |
| gi 547969   | FBgn0005634 | 808.93  | 1615.84 | 1615.83 | 0.01  | 1 | 34  | 0.024    | 1 | K.AKHEATITELEER.L                             | 1.08 | R&H (2D-GIST) |
| gi 547969   | FBgn0005634 | 716.9   | 1431.78 | 1431.78 | 0     | 1 | 41  | 0.005    | 1 | K.REEELTQTLLR.I                               | 0.95 | F&H (2D-GIST) |
| gi 547969   | FBgn0005634 | 633.33  | 1264.64 | 1264.64 | 0     | 0 | 66  | 1.30E-05 | 1 | R.AGVLAHLEEEER.D                              | 1.03 | F&H (2D-GIST) |
| gi 2119295  | FBgn0005634 | 808.93  | 1615.84 | 1615.83 | 0.01  | 1 | 45  | 0.002    | 1 | K.AKHEATITELEER.L                             | 0.92 | R&H (2D-GIST) |
| gi 547969   | FBgn0005634 | 784.93  | 1567.85 | 1567.84 | 0.01  | 0 | 65  | 2.10E-05 | 1 | K.IAHLGLSVTDMTR.A                             | 0.86 | R&L (2D-GIST) |
| gi 547969   | FBgn0005634 | 715.39  | 1428.76 | 1428.76 | 0     | 1 | 42  | 0.0044   | 1 | K.REEELTQTLLR.I                               | 1.01 | R&L (2D-GIST) |
| gi 3929670  | FBgn0005664 | 1070.91 | 3209.71 | 3209.68 | 0.03  | 1 | 117 | 6.70E-11 | 1 | R.LTAQAIAEAQSLVEAQQASQLQLEAQNRR.E             | 1.09 | F&H (2D-GIST) |
| gi 3929670  | FBgn0005664 | 639.82  | 1277.63 | 1277.63 | 0.01  | 0 | 42  | 0.0043   | 1 | R.FNSLEELQTR.L                                | 0.70 | F&H (2D-GIST) |
| gi 3929670  | FBgn0005664 | 721.38  | 1440.75 | 1440.74 | 0.01  | 0 | 45  | 0.0024   | 1 | R.LLNNDLWQLDR.L                               | 0.72 | F&H (2D-GIST) |
| gi 3929670  | FBgn0005664 | 641.33  | 1280.65 | 1280.64 | 0     | 0 | 35  | 0.025    | 1 | R.FNSLEELQTR.L                                | 1.23 | R&H (2D-GIST) |
| gi 3929670  | FBgn0005664 | 1017.87 | 3050.59 | 3050.56 | 0.03  | 0 | 111 | 3.40E-10 | 1 | R.LTAQAIAEAQSLVEAQQASQLQLEAQNRR.R             | 1.02 | R&L (2D-GIST) |
| gi 3929670  | FBgn0005664 | 1122.98 | 3365.93 | 3365.89 | 0.04  | 0 | 65  | 9.90E-07 | 1 | R.LLDQQTLLLAQSLPSIQATVVSHPTLLATR.L            | 1.09 | R&L (2D-GIST) |
| gi 3929670  | FBgn0005664 | 1018.88 | 3053.61 | 3053.58 | 0.03  | 0 | 69  | 4.70E-06 | 1 | R.LTAQAIAEAQSLVEAQQASQLQLEAQNRR.R             | 0.86 | F&H (2D-GIST) |
| gi 3929670  | FBgn0005664 | 1122.98 | 3365.93 | 3365.89 | 0.04  | 0 | 54  | 1.20E-05 | 1 | R.LLDQQTLLLAQSLPSIQATVVSHPTLLATR.L            | 0.62 | R&L (2D-GIST) |
| gi 3929670  | FBgn0005664 | 1069.91 | 3206.69 | 3206.66 | 0.03  | 1 | 151 | 2.20E-14 | 1 | R.LTAQAIAEAQSLVEAQQASQLQLEAQNRR.E             | 1.08 | R&L (2D-GIST) |
| gi 3929670  | FBgn0005664 | 800.94  | 1599.86 | 1599.86 | 0     | 1 | 81  | 4.90E-07 | 1 | R.RLLNNDLWQLDR.L                              | 0.92 | F&H (2D-GIST) |
| gi 3929670  | FBgn0005664 | 768.9   | 1535.78 | 1535.78 | 0     | 1 | 30  | 0.061    | 1 | K.GQYSLIEPDGTRR.I                             | 0.97 | F&H (2D-GIST) |
| gi 3929670  | FBgn0005664 | 558.78  | 1115.54 | 1115.54 | 0     | 1 | 28  | 0.076    | 1 | R.ERDLEAWR.Q                                  | 0.88 | F&H (2D-GIST) |
| gi 17136792 | FBgn0005664 | 1496.18 | 4485.51 | 4485.49 | 0.02  | 1 | 134 | 8.20E-14 | 1 | R.LLDQQTLLLAQSLPSIQATVVSHPTLLATRLPVSTTTSSSR.T | 0.61 | R&H (2D-GIST) |
| gi 3929670  | FBgn0005664 | 800.94  | 1599.86 | 1599.86 | 0.01  | 1 | 62  | 4.30E-05 | 1 | R.RLLNNDLWQLDR.L                              | 1.00 | R&H (2D-GIST) |
| gi 3929670  | FBgn0005664 | 560.29  | 1118.56 | 1118.55 | 0.01  | 1 | 28  | 0.09     | 1 | R.ERDLEAWR.Q                                  | 0.69 | F&H (2D-GIST) |
| gi 17136792 | FBgn0005664 | 560.28  | 1118.55 | 1118.55 | 0     | 1 | 34  | 0.017    | 1 | R.ERDLEAWR.Q                                  | 1.00 | R&H (2D-GIST) |
| gi 17136792 | FBgn0005664 | 800.93  | 1599.85 | 1599.86 | -0.01 | 1 | 38  | 0.011    | 1 | R.RLLNNDLWQLDR.L                              | 1.17 | R&H (2D-GIST) |
| gi 45552151 | FBgn0005666 | 789.87  | 1577.73 | 1577.72 | 0.01  | 0 | 42  | 0.0014   | 1 | K.DFYQTNEANIYR.L                              | 1.21 | F&H (2D-GIST) |
| gi 45552151 | FBgn0005666 | 929.03  | 1856.04 | 1856.03 | 0.01  | 1 | 64  | 1.80E-05 | 1 | R.KVESFLSPLIDQFAK.E                           | 0.93 | R&H (2D-GIST) |
| gi 45552151 | FBgn0005666 | 880.91  | 1759.8  | 1759.82 | -0.01 | 0 | 39  | 0.0032   | 1 | K.AHVPELTNGGEYFR.V                            | 0.83 | F&H (2D-GIST) |
| gi 45552151 | FBgn0005666 | 754.42  | 1506.82 | 1506.82 | 0.01  | 1 | 54  | 0.00021  | 1 | K.SLLNDITVHAGKR.L                             | 0.87 | F&H (2D-GIST) |
| gi 45552151 | FBgn0005666 | 931.46  | 1860.9  | 1860.9  | 0.01  | 0 | 91  | 4.20E-08 | 1 | K.AGPGSPDATETHVARPK.N                         | 0.98 | F&H (2D-GIST) |
| gi 45552151 | FBgn0005666 | 1134.64 | 2267.26 | 2267.24 | 0.02  | 0 | 39  | 0.0049   | 1 | R.RPSVQDLEDLINKPSTPLR.D                       | 0.84 | R&H (2D-GIST) |
| gi 7512013  | FBgn0005666 | 798.41  | 1594.81 | 1594.8  | 0.01  | 0 | 38  | 0.0088   | 1 | R.EIDIMNQLHHQK.L                              | 1.13 | R&H (2D-GIST) |
| gi 7512013  | FBgn0005666 | 897.42  | 1792.83 | 1792.84 | -0.01 | 0 | 33  | 0.011    | 1 | R.NTHYDVMGLEPHYK.Y                            | 1.20 | R&H (2D-GIST) |
| gi 45552151 | FBgn0005666 | 819.88  | 1637.75 | 1637.75 | 0     | 0 | 43  | 0.0011   | 1 | R.ADNLIENHDYSFR.V                             | 0.89 | F&H (2D-GIST) |
| gi 103319   | FBgn0005666 | 880.92  | 1759.82 | 1759.82 | 0     | 0 | 39  | 0.0041   | 1 | K.AHVPELTNGGEYFR.V                            | 0.81 | R&L (2D-GIST) |
| gi 45552151 | FBgn0005666 | 1265.32 | 3792.95 | 3792.92 | 0.03  | 1 | 31  | 0.02     | 1 | K.FVPQPVEISQQSVYDRYDILEEIGTGAFGVVHR.C         | 0.75 | F&H (2D-GIST) |
| gi 45552151 | FBgn0005666 | 903.77  | 2708.3  | 2708.3  | 0     | 0 | 46  | 0.0011   | 1 | R.VLAVNEAGPGHPSKPSDPMATAEHR.Y                 | 0.81 | F&H (2D-GIST) |
| gi 45552151 | FBgn0005666 | 806.39  | 2416.15 | 2416.14 | 0.01  | 0 | 60  | 4.40E-05 | 1 | K.NEHGSFDASAHATVLDLRPSPPK.G                   | 0.90 | F&H (2D-GIST) |
| gi 7512013  | FBgn0005666 | 905.79  | 2714.34 | 2714.34 | 0.01  | 0 | 57  | 9.10E-05 | 1 | R.VLAVNEAGPGHPSKPSDPMATAEHR.Y                 | 0.99 | R&H (2D-GIST) |
| gi 7512013  | FBgn0005666 | 1264.32 | 3789.94 | 3789.9  | 0.04  | 1 | 60  | 2.60E-05 | 1 | K.FVPQPVEISQQSVYDRYDILEEIGTGAFGVVHR.C         | 0.89 | R&L (2D-GIST) |

|             |             |         |         |         |       |   |     |          |   |                                |      |               |
|-------------|-------------|---------|---------|---------|-------|---|-----|----------|---|--------------------------------|------|---------------|
| gij45552151 | FBgn0005666 | 809.05  | 2424.13 | 2424.13 | 0     | 0 | 31  | 0.021    | 1 | R.MTAHECLLHPWLTGDHSAMK.Q       | 0.70 | F&H (2D-GIST) |
| gij7512013  | FBgn0005666 | 807.04  | 2418.1  | 2418.09 | 0.01  | 0 | 50  | 0.00024  | 1 | R.MTAHECLLHPWLTGDHSAMK.Q       | 1.09 | R&L (2D-GIST) |
| gij45552151 | FBgn0005666 | 1021.48 | 2040.94 | 2040.93 | 0.01  | 0 | 46  | 0.00078  | 1 | R.STWSDAGMSTHIVHDVTR.L         | 1.35 | R&L (2D-GIST) |
| gij103319   | FBgn0005666 | 806.39  | 2416.15 | 2416.14 | 0.01  | 0 | 52  | 0.00027  | 1 | K.NEHGSFDASAHATVLDLRPSPPK.G    | 1.46 | R&L (2D-GIST) |
| gij24646341 | FBgn0005671 | 1112.1  | 2222.19 | 2222.17 | 0.02  | 0 | 74  | 1.80E-06 | 1 | K.IPIFSAAGLPHNEIAAQICR.Q       | 0.95 | F&H (2D-GIST) |
| gij24646341 | FBgn0005671 | 1112.09 | 2222.18 | 2222.17 | 0     | 0 | 82  | 3.20E-07 | 1 | K.IPIFSAAGLPHNEIAAQICR.Q       | 0.86 | R&H (2D-GIST) |
| gij24646341 | FBgn0005671 | 740.73  | 2219.16 | 2219.15 | 0.01  | 0 | 60  | 5.20E-05 | 1 | K.IPIFSAAGLPHNEIAAQICR.Q       | 0.90 | R&L (2D-GIST) |
| gij24646341 | FBgn0005671 | 525.63  | 1573.87 | 1573.86 | 0     | 1 | 50  | 0.00046  | 1 | K.RIPASILAEFYPR.D              | 0.79 | F&H (2D-GIST) |
| gij24646341 | FBgn0005671 | 787.94  | 1573.87 | 1573.86 | 0.01  | 1 | 72  | 2.60E-06 | 1 | K.RIPASILAEFYPR.D              | 0.86 | F&H (2D-GIST) |
| gij24646341 | FBgn0005671 | 980.52  | 1959.02 | 1959.01 | 0.01  | 0 | 117 | 1.30E-10 | 1 | K.HVLVILTDMSYAEALR.E           | 1.43 | F&H (2D-GIST) |
| gij24646341 | FBgn0005671 | 526.63  | 1576.88 | 1576.88 | 0     | 1 | 46  | 0.0012   | 1 | K.RIPASILAEFYPR.D              | 1.04 | R&H (2D-GIST) |
| gij24646341 | FBgn0005671 | 789.45  | 1576.89 | 1576.88 | 0.01  | 1 | 69  | 5.70E-06 | 1 | K.RIPASILAEFYPR.D              | 1.06 | R&H (2D-GIST) |
| gij24646341 | FBgn0005671 | 980.52  | 1959.02 | 1959.01 | 0.01  | 0 | 116 | 1.70E-10 | 1 | K.HVLVILTDMSYAEALR.E           | 1.05 | R&L (2D-GIST) |
| gij24646341 | FBgn0005671 | 982.01  | 1962.01 | 1962.03 | -0.02 | 0 | 28  | 0.11     | 1 | K.HVLVILTDMSYAEALR.E           | 0.84 | R&H (2D-GIST) |
| gij24646341 | FBgn0005671 | 982.03  | 1962.04 | 1962.03 | 0.01  | 0 | 100 | 6.10E-09 | 1 | K.HVLVILTDMSYAEALR.E           | 1.23 | R&H (2D-GIST) |
| gij17647193 | FBgn0008635 | 800.4   | 1598.8  | 1598.79 | 0.01  | 0 | 82  | 4.20E-07 | 1 | R.NAFLMLLHADQER.A              | 0.82 | F&H (2D-GIST) |
| gij17647193 | FBgn0008635 | 800.41  | 1598.8  | 1598.79 | 0.01  | 0 | 69  | 9.00E-06 | 1 | R.NAFLMLLHADQER.A              | 1.11 | R&L (2D-GIST) |
| gij17647193 | FBgn0008635 | 775.74  | 2324.2  | 2324.21 | -0.01 | 0 | 58  | 9.30E-05 | 1 | K.LVERPVPVVLAPHDFCNIA          | 0.83 | F&H (2D-GIST) |
| gij17647193 | FBgn0008635 | 775.75  | 2324.21 | 2324.21 | 0     | 0 | 54  | 0.00022  | 1 | K.LVERPVPVVLAPHDFCNIA          | 1.05 | R&L (2D-GIST) |
| gij1350673  | FBgn0010078 | 783.43  | 1564.85 | 1564.84 | 0.01  | 0 | 38  | 0.011    | 1 | R.LPAAGVGDMPVATVK.K            | 0.76 | F&H (2D-GIST) |
| gij1350673  | FBgn0010078 | 780.42  | 1558.82 | 1558.81 | 0.01  | 0 | 33  | 0.04     | 1 | R.LPAAGVGDMPVATVK.K            | 0.92 | R&L (2D-GIST) |
| gij1350673  | FBgn0010078 | 648.88  | 1295.74 | 1295.73 | 0     | 0 | 65  | 1.10E-05 | 1 | K.NLYVIAVHGIR.G                | 1.03 | F&H (2D-GIST) |
| gij1350673  | FBgn0010078 | 648.88  | 1295.74 | 1295.73 | 0     | 0 | 40  | 0.0055   | 1 | K.NLYVIAVHGIR.G                | 0.95 | R&L (2D-GIST) |
| gij17864292 | FBgn0010100 | 950.5   | 1898.98 | 1898.96 | 0.02  | 0 | 43  | 0.0034   | 1 | K.VLYSHLDDPANQDIVR.G           | 0.96 | F&H (2D-GIST) |
| gij17864292 | FBgn0010100 | 950.49  | 1898.96 | 1898.96 | 0.01  | 0 | 47  | 0.001    | 1 | K.VLYSHLDDPANQDIVR.G           | 0.90 | R&H (2D-GIST) |
| gij17864292 | FBgn0010100 | 1159.62 | 2317.22 | 2317.2  | 0.02  | 0 | 33  | 0.026    | 1 | K.VAVPSTVHCDHLIEAQIGGPK.D      | 0.95 | R&H (2D-GIST) |
| gij17864292 | FBgn0010100 | 1343.68 | 2685.35 | 2685.33 | 0.03  | 0 | 74  | 2.00E-06 | 1 | R.NDANPATHCFVTSPELVITALSIAGR.L | 1.27 | R&H (2D-GIST) |
| gij1174382  | FBgn0010213 | 1211.57 | 2421.12 | 2421.12 | 0     | 0 | 78  | 4.40E-07 | 1 | K.HHQTYVNNLNAAEEQLEEK.S        | 0.96 | F&H (2D-GIST) |
| gij1174382  | FBgn0010213 | 1362.66 | 2723.3  | 2723.28 | 0.02  | 0 | 40  | 0.0031   | 1 | K.NVRPSYVEAIWDIANWDDISCR.F     | 0.79 | R&H (2D-GIST) |
| gij1174382  | FBgn0010213 | 1186.1  | 2370.19 | 2370.18 | 0.01  | 0 | 40  | 0.0057   | 1 | R.FNGGGHINHTIFWQNLSPNK.T       | 1.09 | R&H (2D-GIST) |
| gij1174382  | FBgn0010213 | 1211.57 | 2421.13 | 2421.12 | 0.01  | 0 | 89  | 4.40E-08 | 1 | K.HHQTYVNNLNAAEEQLEEK.S        | 0.92 | R&L (2D-GIST) |
| gij38048209 | FBgn0010217 | 774.46  | 1546.9  | 1546.89 | 0.01  | 0 | 43  | 0.0015   | 1 | K.TVLIMELINNVAK.-              | 0.73 | F&H (2D-GIST) |
| gij287945   | FBgn0010217 | 1017.04 | 2032.07 | 2032.06 | 0.01  | 0 | 46  | 0.0013   | 1 | R.AIAELGIYPAVDPLDSTSR.I        | 0.90 | F&H (2D-GIST) |
| gij542579   | FBgn0010217 | 652.83  | 1303.65 | 1303.64 | 0.01  | 0 | 81  | 5.10E-07 | 1 | R.TIAMDGTEGLVR.G               | 0.60 | F&H (2D-GIST) |
| gij542579   | FBgn0010217 | 1024.03 | 2046.05 | 2046.02 | 0.02  | 0 | 39  | 0.0072   | 1 | R.FLSQPQVVAEVFTGHAGK.L         | 0.61 | F&H (2D-GIST) |
| gij542579   | FBgn0010217 | 562.83  | 1123.65 | 1123.65 | 0     | 0 | 35  | 0.0069   | 1 | K.LVPLEQTIK.G                  | 0.70 | F&H (2D-GIST) |
| gij542579   | FBgn0010217 | 822.42  | 1642.83 | 1642.81 | 0.01  | 0 | 66  | 1.80E-05 | 1 | K.VALVYQGMNEPPGAR.A            | 0.76 | F&H (2D-GIST) |
| gij542579   | FBgn0010217 | 705.39  | 1408.77 | 1408.76 | 0.01  | 0 | 73  | 2.50E-06 | 1 | R.IINVIGEPIDER.G               | 0.76 | F&H (2D-GIST) |
| gij542579   | FBgn0010217 | 586.84  | 1171.66 | 1171.65 | 0.01  | 0 | 41  | 0.005    | 1 | K.VVDLLAPYAK.G                 | 0.88 | F&H (2D-GIST) |

|             |             |         |         |         |      |   |     |          |   |                                   |      |               |
|-------------|-------------|---------|---------|---------|------|---|-----|----------|---|-----------------------------------|------|---------------|
| gij287945   | FBgn0010217 | 685.03  | 2052.07 | 2052.06 | 0.01 | 0 | 31  | 0.054    | 1 | R.FLSQPFQVAEVFTGHAGK.L            | 0.73 | R&H (2D-GIST) |
| gij34420414 | FBgn0010217 | 1149.07 | 2296.12 | 2296.09 | 0.03 | 0 | 58  | 6.70E-05 | 1 | R.IPSAVGYQPTLATDMGSMQER.I         | 0.78 | R&H (2D-GIST) |
| gij34420414 | FBgn0010217 | 823.93  | 1645.84 | 1645.83 | 0.01 | 0 | 73  | 2.90E-06 | 1 | K.VALVYQGMNEPPGAR.A               | 0.89 | R&H (2D-GIST) |
| gij38048209 | FBgn0010217 | 589.85  | 1177.69 | 1177.69 | 0.01 | 0 | 47  | 0.00084  | 1 | K.VVDLLAPYAK.G                    | 1.02 | R&H (2D-GIST) |
| gij34420414 | FBgn0010217 | 1027.05 | 2052.09 | 2052.06 | 0.03 | 0 | 52  | 0.00045  | 1 | R.FLSQPFQVAEVFTGHAGK.L            | 1.10 | R&H (2D-GIST) |
| gij38048209 | FBgn0010217 | 705.39  | 1408.76 | 1408.76 | 0.01 | 0 | 73  | 2.80E-06 | 1 | R.IINVIGEPIDER.G                  | 0.95 | R&L (2D-GIST) |
| gij287945   | FBgn0010217 | 562.83  | 1123.65 | 1123.65 | 0    | 0 | 44  | 0.00076  | 1 | K.LVPLEQTIK.G                     | 1.06 | R&L (2D-GIST) |
| gij38048209 | FBgn0010217 | 652.83  | 1303.65 | 1303.64 | 0.01 | 0 | 76  | 1.70E-06 | 1 | R.TIAMDGTEGLVR.G                  | 1.07 | R&L (2D-GIST) |
| gij287945   | FBgn0010217 | 957.99  | 1913.96 | 1913.95 | 0.01 | 0 | 46  | 0.0014   | 1 | R.IMDPNIIGQEHYNVAR.G              | 0.95 | F&H (2D-GIST) |
| gij287945   | FBgn0010217 | 573.98  | 1718.93 | 1718.93 | 0    | 0 | 64  | 1.70E-05 | 1 | R.LVLEVAQHLGENTVR.T               | 0.50 | F&H (2D-GIST) |
| gij287945   | FBgn0010217 | 860.48  | 1718.94 | 1718.93 | 0.01 | 0 | 109 | 4.60E-10 | 1 | R.LVLEVAQHLGENTVR.T               | 0.65 | F&H (2D-GIST) |
| gij287945   | FBgn0010217 | 957.99  | 1913.96 | 1913.95 | 0.01 | 0 | 67  | 1.00E-05 | 1 | R.IMDPNIIGQEHYNVAR.G              | 0.81 | R&H (2D-GIST) |
| gij287945   | FBgn0010217 | 861.98  | 1721.95 | 1721.95 | 0    | 0 | 88  | 8.00E-08 | 1 | R.LVLEVAQHLGENTVR.T               | 0.82 | R&H (2D-GIST) |
| gij287945   | FBgn0010217 | 724.85  | 1447.68 | 1447.68 | 0    | 0 | 63  | 2.10E-05 | 1 | K.AHGGYSVFAGVGER.T                | 0.66 | F&H (2D-GIST) |
| gij287945   | FBgn0010217 | 860.48  | 1718.94 | 1718.93 | 0.01 | 0 | 99  | 5.10E-09 | 1 | R.LVLEVAQHLGENTVR.T               | 0.86 | F&H (2D-GIST) |
| gij2493029  | FBgn0010217 | 861.98  | 1721.95 | 1721.95 | 0    | 0 | 98  | 7.70E-09 | 1 | R.LVLEVAQHLGENTVR.T               | 0.78 | R&H (2D-GIST) |
| gij2493029  | FBgn0010217 | 573.99  | 1718.94 | 1718.93 | 0    | 0 | 66  | 1.20E-05 | 1 | R.LVLEVAQHLGENTVR.T               | 0.76 | R&L (2D-GIST) |
| gij34420414 | FBgn0010217 | 724.85  | 1447.69 | 1447.68 | 0.01 | 0 | 82  | 2.90E-07 | 1 | K.AHGGYSVFAGVGER.T                | 1.28 | R&L (2D-GIST) |
| gij2493029  | FBgn0010217 | 861.98  | 1721.96 | 1721.95 | 0    | 0 | 76  | 1.20E-06 | 1 | R.LVLEVAQHLGENTVR.T               | 0.91 | R&H (2D-GIST) |
| gij2493029  | FBgn0010217 | 860.48  | 1718.94 | 1718.93 | 0.01 | 0 | 114 | 1.50E-10 | 1 | R.LVLEVAQHLGENTVR.T               | 0.35 | F&H (2D-GIST) |
| gij2493029  | FBgn0010217 | 861.99  | 1721.96 | 1721.95 | 0.01 | 0 | 64  | 1.90E-05 | 1 | R.LVLEVAQHLGENTVR.T               | 0.66 | R&H (2D-GIST) |
| gij464992   | FBgn0010288 | 789.36  | 2365.06 | 2365.06 | 0    | 0 | 38  | 0.003    | 1 | K.FTADHEALAQEGQTNAANHEK.V         | 0.97 | R&L (2D-GIST) |
| gij464992   | FBgn0010288 | 690.92  | 1379.82 | 1379.82 | 0    | 0 | 47  | 0.00069  | 1 | K.VIHFFIALVNK.E                   | 0.96 | F&H (2D-GIST) |
| gij464992   | FBgn0010288 | 690.92  | 1379.83 | 1379.82 | 0.01 | 0 | 53  | 0.00016  | 1 | K.VIHFFIALVNK.E                   | 1.08 | R&H (2D-GIST) |
| gij25012868 | FBgn0010352 | 769.37  | 1536.72 | 1536.72 | 0    | 0 | 59  | 4.10E-05 | 1 | K.NAELVWAQEEHK.N                  | 0.71 | F&H (2D-GIST) |
| gij25012868 | FBgn0010352 | 769.37  | 1536.73 | 1536.72 | 0.01 | 0 | 57  | 7.50E-05 | 1 | K.NAELVWAQEEHK.N                  | 1.05 | R&L (2D-GIST) |
| gij25012868 | FBgn0010352 | 598.81  | 1195.61 | 1195.61 | 0    | 0 | 42  | 0.0035   | 1 | K.YHLGTYIER.L                     | 0.80 | F&H (2D-GIST) |
| gij25012868 | FBgn0010352 | 550.8   | 1099.58 | 1099.58 | 0    | 0 | 60  | 8.00E-05 | 1 | R.FLTALNHSR.D                     | 0.65 | F&H (2D-GIST) |
| gij25012868 | FBgn0010352 | 612.32  | 1222.63 | 1222.63 | 0    | 0 | 64  | 2.40E-05 | 1 | K.EETLIHIGNR.F                    | 0.89 | F&H (2D-GIST) |
| gij25012868 | FBgn0010352 | 613.83  | 1225.65 | 1225.65 | 0    | 0 | 40  | 0.0051   | 1 | K.EETLIHIGNR.F                    | 1.26 | R&H (2D-GIST) |
| gij25012868 | FBgn0010352 | 597.3   | 1192.59 | 1192.59 | 0.01 | 0 | 37  | 0.012    | 1 | K.YHLGTYIER.L                     | 0.85 | R&L (2D-GIST) |
| gij28574585 | FBgn0010352 | 851.39  | 2551.15 | 2551.14 | 0    | 0 | 68  | 2.80E-06 | 1 | R.QSGLVMLLPHGMGMEGMPHESSCR.V      | 0.87 | R&L (2D-GIST) |
| gij1079110  | FBgn0010397 | 858.94  | 1715.87 | 1715.87 | 0    | 0 | 69  | 8.30E-06 | 1 | R.HNQYIASLEAELQR.M                | 0.93 | F&H (2D-GIST) |
| gij1079110  | FBgn0010397 | 1213.57 | 2425.13 | 2425.13 | 0    | 1 | 59  | 2.70E-05 | 1 | R.MRDEMAHQLQEYQGLMDIK.V           | 1.00 | F&H (2D-GIST) |
| gij729915   | FBgn0010397 | 771.91  | 1541.81 | 1541.8  | 0.01 | 1 | 44  | 0.0033   | 1 | R.IRELENLLDTER.Q                  | 0.70 | F&H (2D-GIST) |
| gij729915   | FBgn0010397 | 857.43  | 1712.85 | 1712.85 | 0    | 0 | 59  | 8.20E-05 | 1 | R.HNQYIASLEAELQR.I                | 1.03 | F&H (2D-GIST) |
| gij1079110  | FBgn0010397 | 773.42  | 1544.82 | 1544.82 | 0    | 1 | 32  | 0.049    | 1 | R.IRELENLLDTER.Q                  | 0.85 | R&H (2D-GIST) |
| gij1079110  | FBgn0010397 | 857.43  | 1712.85 | 1712.85 | 0    | 0 | 64  | 2.60E-05 | 1 | R.HNQYIASLEAELQR.M                | 1.24 | R&L (2D-GIST) |
| gij1079110  | FBgn0010397 | 982.15  | 2943.44 | 2943.44 | 0    | 0 | 71  | 2.90E-06 | 1 | R.LNIESPGRPTTDSGISSNGSHLTASASSR.S | 1.58 | F&H (2D-GIST) |



|             |             |         |         |         |       |   |     |          |   |                                   |      |               |
|-------------|-------------|---------|---------|---------|-------|---|-----|----------|---|-----------------------------------|------|---------------|
| gij1079110  | FBgn0010397 | 982.15  | 2943.42 | 2943.44 | -0.02 | 0 | 37  | 0.0062   | 1 | R.LNIESPGRPTTDSGISSNGSHLTASASSR.S | 0.89 | R&H (2D-GIST) |
| gij730639   | FBgn0010412 | 525.79  | 1049.56 | 1049.56 | 0     | 0 | 59  | 6.30E-05 | 1 | K.ALQALEHAR.L                     | 0.85 | F&H (2D-GIST) |
| gij730639   | FBgn0010412 | 610.84  | 1219.67 | 1219.67 | 0     | 1 | 70  | 4.50E-06 | 1 | R.KALQALEHAR.L                    | 0.95 | F&H (2D-GIST) |
| gij24642576 | FBgn0010412 | 610.84  | 1219.67 | 1219.67 | 0     | 1 | 69  | 5.50E-06 | 1 | R.KALQALEHAR.L                    | 1.16 | R&L (2D-GIST) |
| gij17136892 | FBgn0010426 | 1017.18 | 3048.53 | 3048.52 | 0.01  | 1 | 75  | 1.40E-06 | 1 | R.HVIDAHTSPVPAVLEIPSKDHPYDASK.D   | 0.93 | F&H (2D-GIST) |
| gij17136892 | FBgn0010426 | 1017.18 | 3048.53 | 3048.52 | 0.01  | 1 | 64  | 1.90E-05 | 1 | R.HVIDAHTSPVPAVLEIPSKDHPYDASK.D   | 0.98 | R&L (2D-GIST) |
| gij17136892 | FBgn0010426 | 720.86  | 1439.7  | 1439.7  | 0     | 1 | 49  | 0.0006   | 1 | K.NRHPNFMVVDK.N                   | 1.38 | R&L (2D-GIST) |
| gij7511828  | FBgn0010434 | 967.49  | 1932.97 | 1932.96 | 0.01  | 0 | 102 | 3.70E-09 | 1 | K.SPLFTTSATTGPHVEST.R.V           | 1.03 | F&H (2D-GIST) |
| gij7511828  | FBgn0010434 | 826.9   | 1651.78 | 1651.78 | 0     | 0 | 93  | 1.80E-08 | 1 | K.NIDGVTHNVEEEVR.N                | 0.91 | F&H (2D-GIST) |
| gij7511828  | FBgn0010434 | 967.49  | 1932.97 | 1932.96 | 0     | 0 | 88  | 8.90E-08 | 1 | K.SPLFTTSATTGPHVEST.R.V           | 0.89 | R&H (2D-GIST) |
| gij7511828  | FBgn0010434 | 828.41  | 1654.8  | 1654.8  | 0     | 0 | 75  | 1.00E-06 | 1 | K.NIDGVTHNVEEEVR.N                | 1.08 | R&H (2D-GIST) |
| gij16769674 | FBgn0010551 | 921.53  | 1841.05 | 1841.03 | 0.02  | 0 | 33  | 0.015    | 1 | R.VLSRPDSLNLPLYLHK.Q              | 1.27 | F&H (2D-GIST) |
| gij16769674 | FBgn0010551 | 894.97  | 1787.93 | 1787.92 | 0.01  | 0 | 117 | 1.20E-10 | 1 | R.LGGIQSDIYSEGLHVR.I              | 0.95 | F&H (2D-GIST) |
| gij16769674 | FBgn0010551 | 921.53  | 1841.04 | 1841.03 | 0.01  | 0 | 35  | 0.011    | 1 | R.VLSRPDSLNLPLYLHK.Q              | 1.07 | R&H (2D-GIST) |
| gij16769674 | FBgn0010551 | 894.97  | 1787.93 | 1787.92 | 0.01  | 0 | 81  | 4.90E-07 | 1 | R.LGGIQSDIYSEGLHVR.I              | 0.96 | F&H (2D-GIST) |
| gij16769674 | FBgn0010551 | 894.97  | 1787.93 | 1787.92 | 0     | 0 | 91  | 4.50E-08 | 1 | R.LGGIQSDIYSEGLHVR.I              | 0.97 | R&H (2D-GIST) |
| gij1154645  | FBgn0010808 | 1344.7  | 2687.39 | 2687.37 | 0.02  | 0 | 76  | 1.30E-06 | 1 | K.VSSYPAAVPIYVQGGGHTISAADVQR.Q    | 1.03 | R&H (2D-GIST) |
| gij1154645  | FBgn0010808 | 757.38  | 1512.74 | 1512.73 | 0     | 1 | 37  | 0.0097   | 1 | K.EYANAVENVHKR.F                  | 1.06 | F&H (2D-GIST) |
| gij24658560 | FBgn0011211 | 653.34  | 1304.67 | 1304.67 | 0.01  | 0 | 33  | 0.03     | 1 | R.SAEISNILEER.I                   | 0.85 | F&H (2D-GIST) |
| gij24658560 | FBgn0011211 | 628.33  | 1254.65 | 1254.65 | 0.01  | 0 | 99  | 8.20E-09 | 1 | R.VVDALGNAIDGK.G                  | 0.73 | F&H (2D-GIST) |
| gij24658560 | FBgn0011211 | 687.37  | 1372.72 | 1372.71 | 0.01  | 0 | 44  | 0.0031   | 1 | K.TSEQALLDTIAK.D                  | 0.75 | F&H (2D-GIST) |
| gij24658560 | FBgn0011211 | 826.96  | 1651.9  | 1651.88 | 0.02  | 0 | 63  | 2.90E-05 | 1 | R.TGAIVDVVPVGDDELLGR.V            | 0.76 | F&H (2D-GIST) |
| gij24658560 | FBgn0011211 | 692.89  | 1383.77 | 1383.76 | 0.01  | 0 | 75  | 2.00E-06 | 1 | K.TALAITIINQK.R                   | 0.79 | F&H (2D-GIST) |
| gij24658560 | FBgn0011211 | 1204.11 | 2406.21 | 2406.18 | 0.03  | 0 | 66  | 1.80E-05 | 1 | R.EVAFAAQFGSDLDAAATQQLLNR.G       | 0.94 | F&H (2D-GIST) |
| gij24658560 | FBgn0011211 | 803.07  | 2406.19 | 2406.18 | 0.01  | 0 | 73  | 3.30E-06 | 1 | R.EVAFAAQFGSDLDAAATQQLLNR.G       | 1.17 | F&H (2D-GIST) |
| gij24658560 | FBgn0011211 | 690.38  | 1378.75 | 1378.75 | 0.01  | 0 | 54  | 0.00025  | 1 | K.TSEQALLDTIAK.D                  | 0.71 | R&H (2D-GIST) |
| gij24658560 | FBgn0011211 | 1205.61 | 2409.21 | 2409.2  | 0.01  | 0 | 72  | 3.10E-06 | 1 | R.EVAFAAQFGSDLDAAATQQLLNR.G       | 0.81 | R&H (2D-GIST) |
| gij24658560 | FBgn0011211 | 803.07  | 2406.2  | 2406.18 | 0.02  | 0 | 70  | 6.40E-06 | 1 | R.EVAFAAQFGSDLDAAATQQLLNR.G       | 0.79 | R&L (2D-GIST) |
| gij24658560 | FBgn0011211 | 628.33  | 1254.65 | 1254.65 | 0.01  | 0 | 75  | 1.90E-06 | 1 | R.VVDALGNAIDGK.G                  | 0.86 | R&L (2D-GIST) |
| gij24658560 | FBgn0011211 | 826.95  | 1651.89 | 1651.88 | 0.01  | 0 | 53  | 0.00027  | 1 | R.TGAIVDVVPVGDDELLGR.V            | 0.96 | R&L (2D-GIST) |
| gij24658560 | FBgn0011211 | 651.83  | 1301.66 | 1301.65 | 0.01  | 0 | 68  | 1.10E-05 | 1 | R.SAEISNILEER.I                   | 1.06 | R&L (2D-GIST) |
| gij24658560 | FBgn0011211 | 692.89  | 1383.77 | 1383.76 | 0.01  | 0 | 81  | 4.20E-07 | 1 | K.TALAITIINQK.R                   | 1.08 | R&L (2D-GIST) |
| gij24658560 | FBgn0011211 | 740.94  | 1479.86 | 1479.85 | 0     | 0 | 56  | 7.20E-05 | 1 | K.GIRPAINVGLSVSR.V                | 0.77 | F&H (2D-GIST) |
| gij24658560 | FBgn0011211 | 798.38  | 1594.74 | 1594.74 | 0     | 0 | 55  | 0.00011  | 1 | R.EAYPGDVFYLHSR.L                 | 0.78 | F&H (2D-GIST) |
| gij24658560 | FBgn0011211 | 742.45  | 1482.88 | 1482.87 | 0.01  | 0 | 45  | 0.00091  | 1 | K.GIRPAINVGLSVSR.V                | 1.05 | R&H (2D-GIST) |
| gij24658560 | FBgn0011211 | 799.89  | 1597.76 | 1597.76 | 0     | 0 | 42  | 0.0021   | 1 | R.EAYPGDVFYLHSR.L                 | 1.38 | R&H (2D-GIST) |
| gij542542   | FBgn0011272 | 585.84  | 1169.67 | 1169.67 | 0     | 0 | 29  | 0.076    | 1 | K.LILFPINEK.K                     | 0.71 | F&H (2D-GIST) |
| gij542542   | FBgn0011272 | 588.87  | 1175.72 | 1175.71 | 0.01  | 0 | 29  | 0.038    | 1 | K.LILFPINEK.K                     | 0.89 | R&H (2D-GIST) |
| gij542542   | FBgn0011272 | 768.86  | 1535.7  | 1535.69 | 0     | 0 | 29  | 0.04     | 1 | K.GNNMIPNQHYHK.W                  | 0.98 | F&H (2D-GIST) |

|             |             |         |         |         |       |   |     |          |   |                                     |      |               |
|-------------|-------------|---------|---------|---------|-------|---|-----|----------|---|-------------------------------------|------|---------------|
| gij730662   | FBgn0011284 | 670.37  | 1338.72 | 1338.72 | 0     | 0 | 50  | 0.00063  | 1 | R.HPGSFDIVHIK.D                     | 0.88 | F&H (2D-GIST) |
| gij730662   | FBgn0011284 | 805.95  | 1609.89 | 1609.88 | 0     | 0 | 44  | 0.0023   | 1 | K.LGGVFAPRPSTGPHK.L                 | 1.16 | F&H (2D-GIST) |
| gij730662   | FBgn0011284 | 540.28  | 1617.83 | 1617.83 | 0.01  | 1 | 57  | 0.00013  | 1 | R.ERHPGSFDIVHIK.D                   | 0.70 | F&H (2D-GIST) |
| gij730662   | FBgn0011284 | 809.92  | 1617.83 | 1617.83 | 0.01  | 1 | 52  | 0.00047  | 1 | R.ERHPGSFDIVHIK.D                   | 0.91 | R&L (2D-GIST) |
| gij730662   | FBgn0011284 | 540.28  | 1617.83 | 1617.83 | 0     | 1 | 62  | 3.90E-05 | 1 | R.ERHPGSFDIVHIK.D                   | 0.92 | R&L (2D-GIST) |
| gij28573630 | FBgn0011643 | 703.99  | 2108.94 | 2108.93 | 0.01  | 0 | 60  | 2.50E-05 | 1 | K.GYGFGGGAGCLSTDTGAHLNR.E           | 0.98 | F&H (2D-GIST) |
| gij28573630 | FBgn0011643 | 747     | 2237.98 | 2237.98 | 0.01  | 1 | 68  | 2.20E-06 | 1 | K.GYGFGGGAGCLSTDTGAHLNR.E-          | 1.03 | F&H (2D-GIST) |
| gij28573630 | FBgn0011643 | 1055.48 | 2108.94 | 2108.93 | 0.01  | 0 | 105 | 7.60E-10 | 1 | K.GYGFGGGAGCLSTDTGAHLNR.E           | 1.16 | F&H (2D-GIST) |
| gij28573630 | FBgn0011643 | 1120    | 2237.99 | 2237.98 | 0.01  | 1 | 108 | 2.20E-10 | 1 | K.GYGFGGGAGCLSTDTGAHLNR.E-          | 1.45 | F&H (2D-GIST) |
| gij28573630 | FBgn0011643 | 1121.51 | 2241.01 | 2240.99 | 0.02  | 1 | 66  | 7.70E-06 | 1 | K.GYGFGGGAGCLSTDTGAHLNR.E-          | 0.81 | R&H (2D-GIST) |
| gij28573630 | FBgn0011643 | 1056.99 | 2111.96 | 2111.95 | 0.01  | 0 | 66  | 4.70E-06 | 1 | K.GYGFGGGAGCLSTDTGAHLNR.E           | 0.92 | R&H (2D-GIST) |
| gij28573630 | FBgn0011643 | 1056.98 | 2111.95 | 2111.95 | 0     | 0 | 73  | 6.20E-07 | 1 | K.GYGFGGGAGCLSTDTGAHLNR.E           | 1.42 | F&H (2D-GIST) |
| gij28573630 | FBgn0011643 | 704.99  | 2111.96 | 2111.95 | 0.01  | 0 | 56  | 4.40E-05 | 1 | K.GYGFGGGAGCLSTDTGAHLNR.E           | 1.35 | R&H (2D-GIST) |
| gij28573630 | FBgn0011643 | 1120    | 2237.98 | 2237.98 | 0     | 1 | 111 | 9.30E-11 | 1 | K.GYGFGGGAGCLSTDTGAHLNR.E-          | 0.80 | R&L (2D-GIST) |
| gij28573630 | FBgn0011643 | 1055.48 | 2108.94 | 2108.93 | 0.01  | 0 | 108 | 3.70E-10 | 1 | K.GYGFGGGAGCLSTDTGAHLNR.E           | 0.93 | R&L (2D-GIST) |
| gij17737681 | FBgn0011712 | 1097.09 | 2192.17 | 2192.15 | 0.02  | 0 | 65  | 1.60E-05 | 1 | R.AALCHLSVDLLNAQHAIEK.Y             | 1.04 | R&H (2D-GIST) |
| gij17737681 | FBgn0011712 | 731.73  | 2192.17 | 2192.15 | 0.01  | 0 | 45  | 0.0016   | 1 | R.AALCHLSVDLLNAQHAIEK.Y             | 1.19 | R&H (2D-GIST) |
| gij17737681 | FBgn0011712 | 1087.51 | 2173    | 2173    | 0     | 0 | 38  | 0.0033   | 1 | K.HHQSIAMEYSDPNLAK.S                | 1.14 | F&H (2D-GIST) |
| gij17737681 | FBgn0011712 | 817.85  | 1633.69 | 1633.7  | -0.01 | 0 | 100 | 7.00E-10 | 1 | K.AGECFCEAATLHAR.A                  | 0.72 | F&H (2D-GIST) |
| gij17737681 | FBgn0011712 | 817.86  | 1633.7  | 1633.7  | 0.01  | 0 | 85  | 3.60E-08 | 1 | K.AGECFCEAATLHAR.A                  | 1.20 | R&L (2D-GIST) |
| gij17530883 | FBgn0011770 | 1122.27 | 3363.78 | 3363.76 | 0.02  | 0 | 41  | 0.0018   | 1 | K.AAGILADVAADNIQLLADLYHLQHLHGNVSK.T | 0.84 | F&H (2D-GIST) |
| gij17530883 | FBgn0011770 | 543.64  | 1627.9  | 1627.89 | 0     | 0 | 54  | 0.00019  | 1 | K.ALIGHFQIAQVPHR.H                  | 0.69 | F&H (2D-GIST) |
| gij929571   | FBgn0013334 | 745.93  | 1489.84 | 1489.83 | 0.01  | 1 | 42  | 0.004    | 1 | K.IKEEILGLSQDR.R                    | 0.85 | F&H (2D-GIST) |
| gij24647307 | FBgn0013334 | 745.92  | 1489.83 | 1489.83 | 0.01  | 1 | 71  | 5.10E-06 | 1 | K.IKEEILGLSQDR.R                    | 1.04 | R&H (2D-GIST) |
| gij929571   | FBgn0013334 | 823.97  | 1645.93 | 1645.93 | 0.01  | 2 | 53  | 0.00022  | 1 | K.IKEEILGLSQDRR.N                   | 0.93 | F&H (2D-GIST) |
| gij929571   | FBgn0013334 | 823.98  | 1645.94 | 1645.93 | 0.01  | 2 | 34  | 0.017    | 1 | K.IKEEILGLSQDRR.N                   | 1.10 | R&H (2D-GIST) |
| gij929571   | FBgn0013334 | 820.95  | 1639.89 | 1639.89 | 0.01  | 2 | 46  | 0.0015   | 1 | K.IKEEILGLSQDRR.N                   | 0.93 | F&H (2D-GIST) |
| gij929571   | FBgn0013334 | 823.97  | 1645.93 | 1645.93 | 0.01  | 2 | 45  | 0.0015   | 1 | K.IKEEILGLSQDRR.N                   | 1.04 | R&H (2D-GIST) |
| gij730352   | FBgn0013726 | 1008.57 | 2015.13 | 2015.13 | 0.01  | 0 | 63  | 1.60E-05 | 1 | K.EHQQAQKPKPPLPVR.Q                 | 1.06 | R&H (2D-GIST) |
| gij730352   | FBgn0013726 | 784.86  | 1567.71 | 1567.71 | 0     | 0 | 76  | 5.50E-07 | 1 | K.DVTNNVHYENYR.C                    | 0.75 | F&H (2D-GIST) |
| gij24653493 | FBgn0013733 | 815.92  | 1629.82 | 1629.82 | 0.01  | 0 | 67  | 1.40E-05 | 1 | R.EFVSDVIGHQADLR.F                  | 0.98 | F&H (2D-GIST) |
| gij6690788  | FBgn0013733 | 937.16  | 2808.45 | 2808.42 | 0.03  | 0 | 43  | 0.0024   | 1 | K.LLEASLAGLEDNEHWISELENELAR.H       | 0.69 | R&H (2D-GIST) |
| gij24653493 | FBgn0013733 | 899.96  | 1797.91 | 1797.9  | 0.01  | 0 | 29  | 0.07     | 1 | R.VQALFDWLDHAEHK.L                  | 0.90 | R&H (2D-GIST) |
| gij24653493 | FBgn0013733 | 966.52  | 1931.03 | 1931.01 | 0.01  | 2 | 52  | 0.00035  | 1 | R.KPANDSDKIHDEVKRL                  | 0.94 | R&H (2D-GIST) |
| gij24653493 | FBgn0013733 | 957.96  | 1913.9  | 1913.88 | 0.02  | 0 | 52  | 0.00018  | 1 | R.AAGGDADHLTSEVDGLADR.M             | 0.95 | R&H (2D-GIST) |
| gij7511951  | FBgn0013733 | 838.96  | 1675.91 | 1675.9  | 0.01  | 0 | 49  | 0.0008   | 1 | R.LPHVEPLSSAESPIR.Q                 | 1.01 | R&H (2D-GIST) |
| gij7511951  | FBgn0013733 | 815.92  | 1629.82 | 1629.82 | 0     | 0 | 43  | 0.0027   | 1 | R.EFVSDVIGHQADLR.F                  | 1.05 | R&H (2D-GIST) |
| gij24653493 | FBgn0013733 | 899.47  | 1796.93 | 1796.92 | 0.01  | 0 | 78  | 9.60E-07 | 1 | R.HEIDQTKPEVEQVR.R                  | 1.09 | R&H (2D-GIST) |
| gij24653493 | FBgn0013733 | 689.39  | 1376.76 | 1376.75 | 0     | 2 | 30  | 0.07     | 1 | R.RLEAGRDELTK.L                     | 0.77 | F&H (2D-GIST) |

|             |             |         |         |         |       |   |    |          |   |                                       |      |               |
|-------------|-------------|---------|---------|---------|-------|---|----|----------|---|---------------------------------------|------|---------------|
| gij6690788  | FBgn0013733 | 938.97  | 1875.93 | 1875.91 | 0.02  | 0 | 89 | 6.70E-08 | 1 | R.FHMLQNAQMALDFLR.Y                   | 1.20 | R&L (2D-GIST) |
| gij6690788  | FBgn0013733 | 937.47  | 2809.38 | 2809.37 | 0.01  | 0 | 48 | 0.0008   | 1 | K.HFQELGHDVVDHLAGTPDAQAVEIK.L         | 0.89 | F&H (2D-GIST) |
| gij21483436 | FBgn0013733 | 858.41  | 2572.21 | 2572.22 | -0.02 | 0 | 65 | 9.90E-06 | 1 | R.LNENGPVHGDLETVQGLCEHHK.H            | 0.80 | R&H (2D-GIST) |
| gij7511874  | FBgn0013733 | 937.47  | 2809.38 | 2809.37 | 0.02  | 0 | 49 | 0.00059  | 1 | K.HFQELGHDVVDHLAGTPDAQAVEIK.L         | 0.67 | R&L (2D-GIST) |
| gij24653493 | FBgn0013733 | 702.36  | 2104.07 | 2104.06 | 0     | 0 | 42 | 0.0041   | 1 | K.SAQNALPLVQQFHEAHNR.L                | 1.35 | F&H (2D-GIST) |
| gij24653493 | FBgn0013733 | 714.38  | 2140.12 | 2140.13 | -0.01 | 0 | 49 | 0.0008   | 1 | R.DGHNLLSLLEVLSGEHLPR.E               | 1.03 | F&H (2D-GIST) |
| gij24653493 | FBgn0013733 | 896.17  | 2685.48 | 2685.45 | 0.03  | 0 | 44 | 0.00091  | 1 | R.LLVSAHKPTLQHqidTHEPIYR.E            | 1.42 | R&H (2D-GIST) |
| gij6690788  | FBgn0013733 | 714.39  | 2140.14 | 2140.13 | 0.01  | 0 | 59 | 6.90E-05 | 1 | R.DGHNLLSLLEVLSGEHLPR.E               | 0.74 | R&L (2D-GIST) |
| gij6690788  | FBgn0013733 | 701.36  | 2101.05 | 2101.05 | 0     | 0 | 36 | 0.017    | 1 | K.SAQNALPLVQQFHEAHNR.L                | 1.07 | R&L (2D-GIST) |
| gij6690788  | FBgn0013733 | 856.41  | 2566.21 | 2566.19 | 0.02  | 0 | 49 | 0.00047  | 1 | R.LNENGPVHGDLETVQGLCEHHK.H            | 1.34 | R&L (2D-GIST) |
| gij24653493 | FBgn0013733 | 896.15  | 2685.44 | 2685.45 | -0.02 | 0 | 30 | 0.035    | 1 | R.LLVSAHKPTLQHqidTHEPIYR.E            | 0.83 | F&H (2D-GIST) |
| gij24648810 | FBgn0013759 | 661.92  | 1321.83 | 1321.82 | 0     | 0 | 38 | 0.00079  | 1 | R.IRPAPVLIFVR.A                       | 0.89 | F&H (2D-GIST) |
| gij2133707  | FBgn0013759 | 748.39  | 1494.78 | 1494.77 | 0.01  | 1 | 45 | 0.002    | 1 | R.THLADTVEELKR.Y                      | 1.11 | F&H (2D-GIST) |
| gij3929615  | FBgn0013759 | 617.87  | 1233.72 | 1233.72 | 0     | 0 | 73 | 1.20E-06 | 1 | K.TLVLLGAHGVGR.R                      | 0.80 | F&H (2D-GIST) |
| gij3929615  | FBgn0013759 | 810.94  | 1619.87 | 1619.87 | 0.01  | 0 | 59 | 6.30E-05 | 1 | R.LSITEVLDHPWIR.D                     | 0.94 | F&H (2D-GIST) |
| gij3929615  | FBgn0013759 | 679.87  | 1357.72 | 1357.71 | 0     | 0 | 42 | 0.005    | 1 | R.LHQFLQLFDR.I                        | 1.01 | F&H (2D-GIST) |
| gij24648810 | FBgn0013759 | 661.92  | 1321.83 | 1321.82 | 0     | 0 | 32 | 0.004    | 1 | R.IRPAPVLIFVR.A                       | 1.04 | R&L (2D-GIST) |
| gij3929615  | FBgn0013759 | 810.95  | 1619.88 | 1619.87 | 0.01  | 0 | 40 | 0.0045   | 1 | R.LSITEVLDHPWIR.D                     | 1.21 | R&L (2D-GIST) |
| gij24648810 | FBgn0013759 | 617.87  | 1233.73 | 1233.72 | 0.01  | 0 | 60 | 2.10E-05 | 1 | K.TLVLLGAHGVGR.R                      | 1.25 | R&L (2D-GIST) |
| gij17647459 | FBgn0013969 | 867.49  | 1732.97 | 1732.96 | 0.01  | 0 | 35 | 0.0095   | 1 | R.IWHVPTSQTQLLLR.C                    | 0.90 | F&H (2D-GIST) |
| gij17647459 | FBgn0013969 | 867.49  | 1732.98 | 1732.96 | 0.01  | 0 | 43 | 0.0015   | 1 | R.IWHVPTSQTQLLLR.C                    | 1.08 | R&L (2D-GIST) |
| gij773424   | FBgn0013969 | 537.26  | 1072.51 | 1072.51 | 0     | 0 | 34 | 0.018    | 1 | K.HWAFSDIR.T                          | 1.17 | R&L (2D-GIST) |
| gij17137088 | FBgn0014009 | 709.84  | 1417.67 | 1417.67 | 0     | 0 | 28 | 0.071    | 1 | R.EHGLVFMETSAR.T                      | 0.63 | F&H (2D-GIST) |
| gij17137088 | FBgn0014009 | 887.93  | 1773.85 | 1773.83 | 0.01  | 0 | 59 | 8.20E-05 | 1 | R.ETFNHLTTWLEDAR.Q                    | 1.03 | F&H (2D-GIST) |
| gij17137088 | FBgn0014009 | 711.35  | 1420.69 | 1420.68 | 0.01  | 0 | 31 | 0.034    | 1 | R.EHGLVFMETSAR.T                      | 1.08 | R&H (2D-GIST) |
| gij17137088 | FBgn0014009 | 887.93  | 1773.84 | 1773.83 | 0.01  | 0 | 63 | 2.70E-05 | 1 | R.ETFNHLTTWLEDAR.Q                    | 1.03 | R&L (2D-GIST) |
| gij2119083  | FBgn0014027 | 904.99  | 1807.96 | 1807.95 | 0.01  | 0 | 70 | 8.00E-06 | 1 | K.SLIADGLVHGHIQACK.A                  | 0.92 | F&H (2D-GIST) |
| gij2119083  | FBgn0014027 | 601.65  | 1801.92 | 1801.91 | 0.01  | 0 | 31 | 0.054    | 1 | K.SLIADGLVHGHIQACK.A                  | 0.79 | F&H (2D-GIST) |
| gij2119083  | FBgn0014027 | 607     | 1817.99 | 1817.98 | 0.01  | 0 | 42 | 0.0028   | 1 | K.LVLTALCNEHQIPLIR.V                  | 0.81 | F&H (2D-GIST) |
| gij2119083  | FBgn0014027 | 910     | 1817.99 | 1817.98 | 0.01  | 0 | 67 | 7.60E-06 | 1 | K.LVLTALCNEHQIPLIR.V                  | 0.96 | F&H (2D-GIST) |
| gij2119083  | FBgn0014027 | 1016.03 | 2030.04 | 2030.02 | 0.01  | 1 | 44 | 0.0022   | 1 | K.DFGEETPALDVVKDHLR.Q                 | 0.68 | R&H (2D-GIST) |
| gij2119083  | FBgn0014027 | 911.51  | 1821.01 | 1821    | 0     | 0 | 63 | 2.70E-05 | 1 | K.LVLTALCNEHQIPLIR.V                  | 1.03 | R&H (2D-GIST) |
| gij2119083  | FBgn0014027 | 904.99  | 1807.96 | 1807.95 | 0.01  | 0 | 46 | 0.0019   | 1 | K.SLIADGLVHGHIQACK.A                  | 1.06 | R&H (2D-GIST) |
| gij2119083  | FBgn0014027 | 998.08  | 1994.15 | 1994.13 | 0.02  | 1 | 30 | 0.019    | 1 | K.KLVLTALCNEHQIPLIR.V                 | 1.09 | R&H (2D-GIST) |
| gij2119083  | FBgn0014027 | 910     | 1818    | 1817.98 | 0.01  | 0 | 74 | 1.50E-06 | 1 | K.LVLTALCNEHQIPLIR.V                  | 0.97 | R&L (2D-GIST) |
| gij2119083  | FBgn0014027 | 901.97  | 1801.92 | 1801.91 | 0     | 0 | 61 | 5.60E-05 | 1 | K.SLIADGLVHGHIQACK.A                  | 1.23 | R&L (2D-GIST) |
| gij2499087  | FBgn0014075 | 769.92  | 1537.83 | 1537.83 | 0     | 0 | 73 | 2.80E-06 | 1 | K.LSESFVIHQAPIR.L                     | 0.70 | F&H (2D-GIST) |
| gij2499087  | FBgn0014075 | 771.43  | 1540.85 | 1540.84 | 0     | 0 | 54 | 0.00023  | 1 | K.LSESFVIHQAPIR.L                     | 0.84 | R&H (2D-GIST) |
| gij2499087  | FBgn0014075 | 1210.26 | 3627.76 | 3627.74 | 0.03  | 0 | 59 | 3.90E-05 | 1 | K.LTDIGGPVHSEFDLEYLLLEGHCFDAASGAPPR.G | 0.84 | R&H (2D-GIST) |

|             |             |         |         |         |       |   |    |          |   |                                      |      |               |
|-------------|-------------|---------|---------|---------|-------|---|----|----------|---|--------------------------------------|------|---------------|
| gij16118392 | FBgn0014141 | 866.39  | 1730.77 | 1730.79 | -0.01 | 0 | 65 | 7.20E-06 | 1 | K.EGQTHADNIFSVDR.N                   | 0.72 | F&H (2D-GIST) |
| gij16118392 | FBgn0014141 | 867.91  | 1733.8  | 1733.8  | -0.01 | 0 | 29 | 0.028    | 1 | K.EGQTHADNIFSVDR.N                   | 0.90 | R&H (2D-GIST) |
| gij16118392 | FBgn0014141 | 714.36  | 1426.7  | 1426.7  | 0     | 0 | 45 | 0.0016   | 1 | K.FNGVHIPDSPFR.I                     | 0.80 | F&H (2D-GIST) |
| gij20151915 | FBgn0014141 | 714.36  | 1426.7  | 1426.7  | 0     | 0 | 42 | 0.0038   | 1 | K.FNGVHIPDSPFR.I                     | 1.06 | R&L (2D-GIST) |
| gij16118392 | FBgn0014141 | 1055.86 | 3164.56 | 3164.55 | 0.01  | 1 | 88 | 7.40E-08 | 1 | K.KVTTYPTSGVPHTVEVNYGGVSTPNSPHR.V    | 0.64 | F&H (2D-GIST) |
| gij16118392 | FBgn0014141 | 999.14  | 2994.41 | 2994.45 | -0.04 | 0 | 70 | 3.60E-06 | 1 | K.VTYTPTSGVPHTVEVNYGGVSTPNSPHR.V     | 1.29 | F&H (2D-GIST) |
| gij16118392 | FBgn0014141 | 1057.87 | 3170.59 | 3170.59 | 0     | 1 | 47 | 0.00085  | 1 | K.KVTTYPTSGVPHTVEVNYGGVSTPNSPHR.V    | 0.84 | R&H (2D-GIST) |
| gij16118392 | FBgn0014141 | 576.29  | 1725.84 | 1725.83 | 0     | 0 | 37 | 0.011    | 1 | K.HAGHNNYVQYLVR.D                    | 1.03 | F&H (2D-GIST) |
| gij24581956 | FBgn0014189 | 877.5   | 1752.98 | 1752.98 | 0     | 0 | 30 | 0.048    | 1 | K.LTLHGLQQHYVNLK.E                   | 1.02 | F&H (2D-GIST) |
| gij24581956 | FBgn0014189 | 660.36  | 1318.7  | 1318.7  | 0     | 0 | 72 | 3.40E-06 | 1 | K.SGTPHIVVGTGPR.I                    | 0.94 | F&H (2D-GIST) |
| gij24581956 | FBgn0014189 | 771.42  | 2311.24 | 2311.22 | 0.02  | 0 | 81 | 4.20E-07 | 1 | R.CVALSQQLLTEQNFAIGHR.G              | 0.85 | R&H (2D-GIST) |
| gij24581956 | FBgn0014189 | 676.84  | 1351.66 | 1351.65 | 0     | 0 | 35 | 0.012    | 1 | K.GTYVSIHSSGFR.D                     | 0.82 | F&H (2D-GIST) |
| gij24581956 | FBgn0014189 | 874.48  | 1746.94 | 1746.94 | 0     | 0 | 44 | 0.0021   | 1 | K.LTLHGLQQHYVNLK.E                   | 1.21 | F&H (2D-GIST) |
| gij24581956 | FBgn0014189 | 874.48  | 1746.95 | 1746.94 | 0.01  | 0 | 44 | 0.0019   | 1 | K.LTLHGLQQHYVNLK.E                   | 1.13 | R&L (2D-GIST) |
| gij1079115  | FBgn0014869 | 886.96  | 1771.9  | 1771.87 | 0.02  | 0 | 63 | 3.70E-05 | 1 | K.DAGLEFDVAHTSVLTRA.A                | 1.00 | F&H (2D-GIST) |
| gij24650981 | FBgn0014869 | 888.46  | 1774.91 | 1774.89 | 0.02  | 0 | 51 | 0.0006   | 1 | K.DAGLEFDVAHTSVLTRA.A                | 1.26 | R&H (2D-GIST) |
| gij1079115  | FBgn0014869 | 603.85  | 1205.69 | 1205.69 | 0     | 0 | 56 | 7.40E-05 | 1 | R.ILIAAHGNSLR.G                      | 0.89 | F&H (2D-GIST) |
| gij1079115  | FBgn0014869 | 605.36  | 1208.71 | 1208.71 | 0     | 0 | 60 | 3.40E-05 | 1 | R.ILIAAHGNSLR.G                      | 1.21 | R&H (2D-GIST) |
| gij6409185  | FBgn0015221 | 765.4   | 2293.19 | 2293.18 | 0.01  | 1 | 49 | 0.00066  | 1 | K.RGTLEVDELHSLALALDTEK.Q             | 1.37 | F&H (2D-GIST) |
| gij6409185  | FBgn0015221 | 949.11  | 2844.31 | 2844.3  | 0.01  | 1 | 72 | 1.60E-06 | 1 | R.ATHATDAERDPELAHYFEENFLGK.Q         | 1.28 | F&H (2D-GIST) |
| gij6409185  | FBgn0015221 | 949.11  | 2844.31 | 2844.3  | 0.01  | 1 | 60 | 2.80E-05 | 1 | R.ATHATDAERDPELAHYFEENFLGK.Q         | 1.32 | F&H (2D-GIST) |
| gij6409185  | FBgn0015221 | 949.11  | 2844.31 | 2844.3  | 0.01  | 1 | 80 | 2.60E-07 | 1 | R.ATHATDAERDPELAHYFEENFLGK.Q         | 0.83 | R&L (2D-GIST) |
| gij6409185  | FBgn0015221 | 1186.95 | 3557.82 | 3557.87 | -0.05 | 2 | 32 | 0.033    | 1 | K.RGTLEVDELHSLALALDTEKQLATGATHVHSR.A | 1.00 | R&H (2D-GIST) |
| gij1072120  | FBgn0015268 | 939.9   | 1877.78 | 1877.77 | 0     | 0 | 54 | 1.90E-05 | 1 | K.EPESSTDNEADAHFRE.E                 | 0.88 | F&H (2D-GIST) |
| gij1072120  | FBgn0015268 | 1042.5  | 2082.99 | 2082.99 | 0     | 0 | 57 | 6.60E-05 | 1 | R.NTAIMSEMVPQHPDEPAIR.K              | 1.18 | R&H (2D-GIST) |
| gij24644298 | FBgn0015324 | 783.45  | 1564.89 | 1564.88 | 0.01  | 0 | 32 | 0.016    | 1 | R.LDLISQQLVPEIR.N                    | 0.90 | F&H (2D-GIST) |
| gij24644298 | FBgn0015324 | 783.46  | 1564.9  | 1564.88 | 0.02  | 0 | 32 | 0.014    | 1 | R.LDLISQQLVPEIR.N                    | 1.27 | R&L (2D-GIST) |
| gij24644298 | FBgn0015324 | 692.82  | 1383.63 | 1383.63 | 0     | 0 | 42 | 0.0012   | 1 | R.EDHVSSVLDDAR.K                     | 0.91 | F&H (2D-GIST) |
| gij24644298 | FBgn0015324 | 548.28  | 1641.82 | 1641.81 | 0     | 1 | 42 | 0.0029   | 1 | K.VREDHVSSVLDDAR.K                   | 0.88 | F&H (2D-GIST) |
| gij24644298 | FBgn0015324 | 820.41  | 1638.8  | 1638.8  | 0     | 1 | 32 | 0.031    | 1 | K.VREDHVSSVLDDAR.K                   | 0.90 | F&H (2D-GIST) |
| gij24644298 | FBgn0015324 | 548.28  | 1641.82 | 1641.81 | 0     | 1 | 45 | 0.0014   | 1 | K.VREDHVSSVLDDAR.K                   | 1.08 | R&H (2D-GIST) |
| gij24644298 | FBgn0015324 | 820.41  | 1638.8  | 1638.8  | 0     | 1 | 29 | 0.062    | 1 | K.VREDHVSSVLDDAR.K                   | 0.92 | R&L (2D-GIST) |
| gij24639088 | FBgn0015390 | 1026.54 | 2051.06 | 2051.04 | 0.02  | 1 | 43 | 0.0032   | 1 | K.EASRPASVAESIKDEAEK.S               | 1.06 | R&H (2D-GIST) |
| gij7460239  | FBgn0015390 | 1283.09 | 2564.17 | 2564.16 | 0.01  | 0 | 80 | 2.00E-07 | 1 | K.ATEHVSEHVTTTGESSTETSQEK.S          | 0.84 | R&H (2D-GIST) |
| gij24639088 | FBgn0015390 | 921.48  | 1840.94 | 1840.94 | 0     | 0 | 33 | 0.03     | 1 | K.SESRPESVIASGEPVPR.E                | 1.39 | R&H (2D-GIST) |
| gij7460239  | FBgn0015390 | 853.72  | 2558.13 | 2558.13 | 0     | 0 | 74 | 5.80E-07 | 1 | K.ATEHVSEHVTTTGESSTETSQEK.S          | 0.91 | R&L (2D-GIST) |
| gij24639088 | FBgn0015390 | 836.4   | 2506.18 | 2506.17 | 0.01  | 0 | 57 | 8.50E-05 | 1 | K.LVEEHEHVVEELAQEVTSTSK.T            | 1.02 | R&L (2D-GIST) |
| gij24639088 | FBgn0015390 | 856.08  | 2565.23 | 2565.23 | 0     | 2 | 48 | 0.00079  | 1 | K.DVSRPASVVESVKDEHDKAESR.R           | 0.73 | F&H (2D-GIST) |
| gij7460239  | FBgn0015390 | 859.1   | 2574.28 | 2574.29 | -0.01 | 2 | 31 | 0.037    | 1 | K.DVSRPASVVESVKDEHDKAESR.R           | 0.64 | R&H (2D-GIST) |

|             |             |         |         |         |       |   |    |          |   |                                   |      |               |
|-------------|-------------|---------|---------|---------|-------|---|----|----------|---|-----------------------------------|------|---------------|
| gij7460239  | FBgn0015390 | 763.06  | 2286.15 | 2286.15 | 0.01  | 1 | 28 | 0.084    | 1 | R.DAHVYPQIGHFFGNVPRK.G            | 0.75 | R&H (2D-GIST) |
| gij2213427  | FBgn0015622 | 446.73  | 891.45  | 891.44  | 0     | 0 | 32 | 0.032    | 1 | K.MHFIFR.H                        | 0.77 | R&L (2D-GIST) |
| gij2213427  | FBgn0015622 | 981.94  | 1961.86 | 1961.85 | 0     | 1 | 73 | 6.10E-07 | 1 | K.KFHFDHFDDVEESR.K                | 1.06 | F&H (2D-GIST) |
| gij2213427  | FBgn0015622 | 654.96  | 1961.86 | 1961.85 | 0.01  | 1 | 55 | 4.50E-05 | 1 | K.KFHFDHFDDVEESR.K                | 1.16 | F&H (2D-GIST) |
| gij2213427  | FBgn0015622 | 984.95  | 1967.89 | 1967.89 | 0     | 1 | 52 | 0.00011  | 1 | K.KFHFDHFDDVEESR.K                | 0.76 | R&H (2D-GIST) |
| gij2213427  | FBgn0015622 | 654.96  | 1961.86 | 1961.85 | 0     | 1 | 54 | 5.20E-05 | 1 | K.KFHFDHFDDVEESR.K                | 0.87 | R&L (2D-GIST) |
| gij1296517  | FBgn0015623 | 822.47  | 1642.92 | 1642.91 | 0.01  | 0 | 89 | 6.00E-08 | 1 | R.TALTHYLEITAIPR.T                | 0.82 | F&H (2D-GIST) |
| gij1296517  | FBgn0015623 | 822.47  | 1642.92 | 1642.91 | 0.01  | 0 | 85 | 1.70E-07 | 1 | R.TALTHYLEITAIPR.T                | 1.00 | R&H (2D-GIST) |
| gij1296517  | FBgn0015623 | 867.95  | 1733.89 | 1733.88 | 0     | 0 | 32 | 0.043    | 1 | R.LHSIQNRPPFDAK.N                 | 1.10 | R&L (2D-GIST) |
| gij1296517  | FBgn0015623 | 820.96  | 1639.9  | 1639.89 | 0.01  | 0 | 81 | 4.60E-07 | 1 | R.TALTHYLEITAIPR.T                | 1.39 | R&L (2D-GIST) |
| gij1296517  | FBgn0015623 | 630.98  | 1889.93 | 1889.92 | 0     | 0 | 39 | 0.0077   | 1 | K.SCRPPIDHVCELLPR.L               | 0.90 | F&H (2D-GIST) |
| gij1296517  | FBgn0015623 | 631.99  | 1892.96 | 1892.94 | 0.01  | 0 | 31 | 0.042    | 1 | K.SCRPPIDHVCELLPR.L               | 1.17 | R&H (2D-GIST) |
| gij7739653  | FBgn0015778 | 719.86  | 1437.71 | 1437.7  | 0.01  | 1 | 42 | 0.0029   | 1 | K.KYYVHNDIFR.Y                    | 0.81 | F&H (2D-GIST) |
| gij7739653  | FBgn0015778 | 883.9   | 1765.78 | 1765.77 | 0.01  | 0 | 43 | 0.00086  | 1 | R.FYNHNSSYIHGESK.L                | 1.20 | F&H (2D-GIST) |
| gij7739653  | FBgn0015778 | 722.88  | 1443.74 | 1443.74 | 0     | 1 | 29 | 0.072    | 1 | K.KYYVHNDIFR.Y                    | 1.11 | R&H (2D-GIST) |
| gij7739653  | FBgn0015778 | 634.81  | 1267.6  | 1267.6  | 0     | 0 | 48 | 0.0005   | 1 | K.YYVHNDIFR.Y                     | 1.02 | R&L (2D-GIST) |
| gij45551889 | FBgn0015778 | 1071.84 | 3212.49 | 3212.49 | -0.01 | 0 | 61 | 1.50E-05 | 1 | R.SSNTQQFGDNQQLFLGNIPHHASEDDL.R.E | 0.73 | F&H (2D-GIST) |
| gij7739653  | FBgn0015778 | 1071.84 | 3212.49 | 3212.49 | 0     | 0 | 78 | 2.90E-07 | 1 | R.SSNTQQFGDNQQLFLGNIPHHASEDDL.R.E | 0.53 | R&H (2D-GIST) |
| gij17648041 | FBgn0015834 | 889.44  | 1776.87 | 1776.86 | 0.01  | 0 | 45 | 0.0017   | 1 | K.GHFGPINSLAFHPDGK.S              | 0.86 | F&H (2D-GIST) |
| gij17648041 | FBgn0015834 | 823.41  | 1644.81 | 1644.8  | 0.01  | 0 | 62 | 3.20E-05 | 1 | R.FFHLYEEEEFAR.L                  | 0.96 | F&H (2D-GIST) |
| gij17648041 | FBgn0015834 | 823.41  | 1644.81 | 1644.8  | 0.01  | 0 | 50 | 0.00051  | 1 | R.FFHLYEEEEFAR.L                  | 1.00 | R&H (2D-GIST) |
| gij17648041 | FBgn0015834 | 821.9   | 1641.78 | 1641.78 | 0     | 0 | 59 | 5.00E-05 | 1 | R.FFHLYEEEEFAR.L                  | 1.28 | R&L (2D-GIST) |
| gij17648041 | FBgn0015834 | 821.9   | 1641.78 | 1641.78 | -0.01 | 0 | 58 | 6.70E-05 | 1 | R.FFHLYEEEEFAR.L                  | 1.62 | R&L (2D-GIST) |
| gij1490232  | FBgn0016120 | 731.93  | 1461.85 | 1461.83 | 0.01  | 0 | 66 | 1.10E-05 | 1 | K.LVPPVAGLVDSFQK.Q                | 0.71 | F&H (2D-GIST) |
| gij21406656 | FBgn0016120 | 1088.55 | 2175.09 | 2175.06 | 0.03  | 0 | 35 | 0.016    | 1 | R.AVLANPECPPQIDWANYK.K            | 0.91 | R&H (2D-GIST) |
| gij21406656 | FBgn0016120 | 731.93  | 1461.84 | 1461.83 | 0.01  | 0 | 76 | 1.10E-06 | 1 | K.LVPPVAGLVDSFQK.Q                | 1.02 | R&H (2D-GIST) |
| gij1490232  | FBgn0016120 | 777.38  | 1552.74 | 1552.74 | 0     | 1 | 72 | 2.10E-06 | 1 | K.SKEQLEAEAQGHH.-                 | 0.97 | R&H (2D-GIST) |
| gij38047697 | FBgn0016126 | 889.97  | 1777.92 | 1777.92 | 0     | 0 | 37 | 0.019    | 1 | K.YNLHGLLGTGAFSEVR.L              | 1.15 | R&H (2D-GIST) |
| gij27820092 | FBgn0016126 | 690.35  | 2068.03 | 2068.02 | 0     | 0 | 35 | 0.016    | 1 | R.QILEAVDYMHEQGVVHR.D             | 0.99 | R&H (2D-GIST) |
| gij1490236  | FBgn0016691 | 892.5   | 1782.98 | 1782.96 | 0.01  | 0 | 68 | 7.90E-06 | 1 | R.FAPATVNLLGLLADNGR.L             | 0.41 | F&H (2D-GIST) |
| gij1490236  | FBgn0016691 | 894.01  | 1786    | 1785.98 | 0.02  | 0 | 57 | 0.00011  | 1 | R.FAPATVNLLGLLADNGR.L             | 0.35 | R&H (2D-GIST) |
| gij1490236  | FBgn0016691 | 650.38  | 1298.75 | 1298.74 | 0.01  | 1 | 54 | 0.00017  | 1 | K.KLDTVINAYK.T                    | 0.66 | R&H (2D-GIST) |
| gij24646379 | FBgn0016693 | 605.85  | 1209.69 | 1209.69 | 0.01  | 0 | 49 | 0.00043  | 1 | K.VHAFIAELR.K                     | 0.84 | F&H (2D-GIST) |
| gij25012713 | FBgn0016693 | 741.03  | 2220.07 | 2220.06 | 0.01  | 0 | 36 | 0.014    | 1 | K.LLPLEEHYQFHFHSPK.L              | 0.87 | R&L (2D-GIST) |
| gij1498589  | FBgn0016697 | 751.35  | 1500.68 | 1500.68 | 0     | 0 | 54 | 0.00011  | 1 | K.HIGCATSGLMADAR.T                | 0.70 | F&H (2D-GIST) |
| gij1498589  | FBgn0016697 | 752.86  | 1503.71 | 1503.7  | 0.01  | 0 | 61 | 2.40E-05 | 1 | K.HIGCATSGLMADAR.T                | 1.13 | R&H (2D-GIST) |
| gij1498589  | FBgn0016697 | 911.9   | 1821.79 | 1821.79 | 0.01  | 0 | 66 | 3.40E-06 | 1 | R.VECQNHWFVYNER.M                 | 1.07 | R&L (2D-GIST) |
| gij7511958  | FBgn0016724 | 742.45  | 1482.88 | 1482.87 | 0.01  | 0 | 31 | 0.022    | 1 | K.FDGALIHLIAPVK.G                 | 1.13 | F&H (2D-GIST) |
| gij7511958  | FBgn0016724 | 922.54  | 1843.07 | 1843.06 | 0.02  | 0 | 51 | 0.0002   | 1 | K.EKPIHSSIAELLGDR.K               | 1.47 | F&H (2D-GIST) |

|             |             |         |         |         |      |   |     |          |   |                               |      |               |
|-------------|-------------|---------|---------|---------|------|---|-----|----------|---|-------------------------------|------|---------------|
| gi 7511958  | FBgn0016724 | 745.85  | 1489.69 | 1489.68 | 0.01 | 1 | 47  | 0.00074  | 1 | R.RYSFNNEVSYK.L               | 0.70 | F&H (2D-GIST) |
| gi 7511958  | FBgn0016724 | 731.87  | 1461.72 | 1461.71 | 0.01 | 1 | 63  | 2.90E-05 | 1 | K.RQDFIDGTAEVK.L              | 0.98 | F&H (2D-GIST) |
| gi 7511958  | FBgn0016724 | 883.46  | 1764.91 | 1764.9  | 0.01 | 0 | 106 | 1.50E-09 | 1 | K.MLNQITSSLADTLFK.T           | 1.18 | F&H (2D-GIST) |
| gi 7511958  | FBgn0016724 | 745.85  | 1489.69 | 1489.68 | 0.01 | 1 | 44  | 0.0016   | 1 | R.RYSFNNEVSYK.L               | 0.88 | R&L (2D-GIST) |
| gi 7511958  | FBgn0016724 | 883.46  | 1764.91 | 1764.9  | 0.01 | 0 | 96  | 1.70E-08 | 1 | K.MLNQITSSLADTLFK.T           | 1.08 | R&L (2D-GIST) |
| gi 7511958  | FBgn0016724 | 731.87  | 1461.72 | 1461.71 | 0.01 | 1 | 59  | 7.80E-05 | 1 | K.RQDFIDGTAEVK.L              | 1.20 | R&L (2D-GIST) |
| gi 7511958  | FBgn0016724 | 581.83  | 1161.64 | 1161.63 | 0.01 | 0 | 59  | 8.40E-05 | 1 | R.ILDIYNSLK.E                 | 1.54 | R&L (2D-GIST) |
| gi 7511958  | FBgn0016724 | 858.91  | 1715.81 | 1715.81 | 0.01 | 0 | 32  | 0.023    | 1 | K.SYGLDITTFYHSAHK.K           | 1.12 | F&H (2D-GIST) |
| gi 7511958  | FBgn0016724 | 945.48  | 1888.95 | 1888.93 | 0.02 | 1 | 42  | 0.0039   | 1 | K.SYGLDITTFYHSAHK.G           | 1.36 | F&H (2D-GIST) |
| gi 7511958  | FBgn0016724 | 875.49  | 1748.97 | 1748.97 | 0    | 0 | 53  | 0.00019  | 1 | K.LDAVEHTTLIIVDLR.D           | 1.29 | F&H (2D-GIST) |
| gi 7511958  | FBgn0016724 | 875.5   | 1748.98 | 1748.97 | 0.02 | 0 | 67  | 5.30E-06 | 1 | K.LDAVEHTTLIIVDLR.D           | 1.20 | F&H (2D-GIST) |
| gi 7511958  | FBgn0016724 | 740.88  | 1479.74 | 1479.74 | 0    | 0 | 48  | 0.00079  | 1 | R.CLPIHGLHGQHK.C              | 0.74 | F&H (2D-GIST) |
| gi 7511958  | FBgn0016724 | 749.39  | 2245.14 | 2245.14 | 0    | 0 | 52  | 0.00042  | 1 | K.LNGNLVEYPQHLSGLHAWR.R       | 1.37 | F&H (2D-GIST) |
| gi 7511958  | FBgn0016724 | 1125.1  | 2248.18 | 2248.16 | 0.02 | 0 | 54  | 0.00026  | 1 | K.LNGNLVEYPQHLSGLHAWR.R       | 0.64 | R&H (2D-GIST) |
| gi 7511958  | FBgn0016724 | 750.4   | 2248.16 | 2248.16 | 0.01 | 0 | 45  | 0.0018   | 1 | K.LNGNLVEYPQHLSGLHAWR.R       | 0.92 | R&H (2D-GIST) |
| gi 1813955  | FBgn0017539 | 775.42  | 1548.83 | 1548.83 | 0    | 0 | 77  | 1.10E-06 | 1 | R.GVLALNLEDGTLHR.F            | 0.52 | F&H (2D-GIST) |
| gi 1813955  | FBgn0017539 | 775.42  | 1548.83 | 1548.83 | 0    | 0 | 78  | 9.60E-07 | 1 | R.GVLALNLEDGTLHR.F            | 0.73 | F&H (2D-GIST) |
| gi 1813955  | FBgn0017539 | 1143.59 | 2285.16 | 2285.15 | 0.01 | 0 | 97  | 1.10E-08 | 1 | K.DVIVPGLYAAGEAASSVHGANR.L    | 0.92 | R&H (2D-GIST) |
| gi 1813955  | FBgn0017539 | 776.93  | 1551.85 | 1551.84 | 0.01 | 0 | 71  | 4.20E-06 | 1 | R.GVLALNLEDGTLHR.F            | 0.94 | R&H (2D-GIST) |
| gi 1752661  | FBgn0017545 | 1087.52 | 2173.03 | 2173.02 | 0.01 | 1 | 85  | 9.70E-08 | 1 | R.NVLCNFHGMDLTDDKYR.S         | 0.91 | R&H (2D-GIST) |
| gi 1752661  | FBgn0017545 | 665.86  | 1329.71 | 1329.71 | 0    | 0 | 41  | 0.0071   | 1 | R.IYPLHDVYIR.K                | 0.83 | F&H (2D-GIST) |
| gi 1752661  | FBgn0017545 | 665.86  | 1329.71 | 1329.71 | 0    | 0 | 33  | 0.044    | 1 | R.IYPLHDVYIR.K                | 1.20 | R&L (2D-GIST) |
| gi 20151935 | FBgn0017645 | 922.5   | 1842.99 | 1842.99 | 0    | 0 | 34  | 0.026    | 1 | K.FIGPVVMEVPHFASLR.G          | 1.22 | F&H (2D-GIST) |
| gi 20151935 | FBgn0017645 | 921     | 1839.98 | 1839.97 | 0.01 | 0 | 53  | 0.00031  | 1 | K.FIGPVVMEVPHFASLR.G          | 0.94 | R&L (2D-GIST) |
| gi 20151935 | FBgn0017645 | 777.89  | 1553.76 | 1553.75 | 0.01 | 0 | 38  | 0.0073   | 1 | R.SGHEQVVDMLLER.G             | 0.96 | R&L (2D-GIST) |
| gi 20151935 | FBgn0017645 | 938.16  | 2811.45 | 2811.42 | 0.03 | 0 | 47  | 0.001    | 1 | K.AGFTPLHLSSEQGHAEISNLLIEHK.A | 1.15 | F&H (2D-GIST) |
| gi 20151935 | FBgn0017645 | 764.03  | 2289.08 | 2289.08 | 0    | 0 | 57  | 6.80E-05 | 1 | K.ATVDGVYIANGSGHDEPPHVGR.K    | 0.57 | F&H (2D-GIST) |
| gi 6094287  | FBgn0019652 | 681.37  | 1360.73 | 1360.73 | 0.01 | 0 | 33  | 0.034    | 1 | R.LLLEYEMHLR.N                | 0.89 | F&H (2D-GIST) |
| gi 6094287  | FBgn0019652 | 799.93  | 1597.85 | 1597.85 | 0.01 | 0 | 56  | 0.00021  | 1 | K.TGTLHLLQEEIFR.L             | 0.82 | F&H (2D-GIST) |
| gi 6094287  | FBgn0019652 | 661.88  | 1321.74 | 1321.74 | 0    | 0 | 39  | 0.0045   | 1 | K.SLLTHVSRPTK.N               | 1.15 | F&H (2D-GIST) |
| gi 6094288  | FBgn0019652 | 1055.55 | 2109.08 | 2109.07 | 0.01 | 0 | 89  | 9.20E-08 | 1 | R.HQIQTQILQWEENLER.L          | 0.69 | R&H (2D-GIST) |
| gi 6094288  | FBgn0019652 | 801.44  | 1600.87 | 1600.87 | 0    | 0 | 58  | 9.80E-05 | 1 | K.TGTLHLLQEEIFR.L             | 0.90 | R&H (2D-GIST) |
| gi 6094287  | FBgn0019652 | 686.69  | 2057.05 | 2057.04 | 0    | 0 | 57  | 0.00011  | 1 | K.VLHPNEGHALQEFLAAR.N         | 0.94 | F&H (2D-GIST) |
| gi 6094287  | FBgn0019652 | 687.7   | 2060.07 | 2060.06 | 0.01 | 0 | 57  | 0.00011  | 1 | K.VLHPNEGHALQEFLAAR.N         | 0.69 | R&H (2D-GIST) |
| gi 6094287  | FBgn0019652 | 750.08  | 2247.22 | 2247.22 | 0    | 1 | 33  | 0.02     | 1 | K.HLIIVDGAIMQPIPEHPKR.D       | 0.74 | R&L (2D-GIST) |
| gi 6094287  | FBgn0019652 | 596.96  | 1787.87 | 1787.86 | 0.01 | 0 | 56  | 0.00013  | 1 | R.IHEEYGAIFDHLFR.Q            | 0.97 | R&L (2D-GIST) |
| gi 1877191  | FBgn0019960 | 587.66  | 1759.94 | 1759.94 | 0.01 | 1 | 29  | 0.087    | 1 | K.LVDHIGNVKDELYR.H            | 1.27 | F&H (2D-GIST) |
| gi 45549224 | FBgn0019960 | 877.96  | 1753.91 | 1753.9  | 0.01 | 1 | 63  | 3.00E-05 | 1 | K.LVDHIGNVKDELYR.H            | 0.62 | F&H (2D-GIST) |
| gi 45549224 | FBgn0019960 | 880.98  | 1759.94 | 1759.94 | 0    | 1 | 56  | 0.00016  | 1 | K.LVDHIGNVKDELYR.H            | 0.98 | R&H (2D-GIST) |

|             |             |         |         |         |       |   |     |          |   |                                 |      |               |
|-------------|-------------|---------|---------|---------|-------|---|-----|----------|---|---------------------------------|------|---------------|
| gij45549224 | FBgn0019960 | 702.36  | 1402.7  | 1402.69 | 0     | 0 | 35  | 0.016    | 1 | R.AQLEYHLEAER.R                 | 0.76 | R&H (2D-GIST) |
| gij29427665 | FBgn0019960 | 519.6   | 1555.78 | 1555.77 | 0     | 1 | 33  | 0.027    | 1 | R.AQLEYHLEAERR.K                | 0.68 | F&H (2D-GIST) |
| gij24653990 | FBgn0020236 | 739.86  | 1477.71 | 1477.7  | 0.01  | 0 | 44  | 0.0028   | 1 | R.YPGSTFMDHILR.Y                | 0.73 | R&L (2D-GIST) |
| gij24653990 | FBgn0020236 | 968.47  | 2902.39 | 2902.43 | -0.03 | 1 | 62  | 2.80E-05 | 1 | K.ATDGVIEGIAIGGDRYPGSTFMDHILR.Y | 0.81 | R&L (2D-GIST) |
| gij24647885 | FBgn0020238 | 637.81  | 1273.61 | 1273.6  | 0.01  | 0 | 49  | 0.00038  | 1 | R.YLAEFATGSDR.K                 | 0.68 | F&H (2D-GIST) |
| gij24647885 | FBgn0020238 | 721.36  | 1440.7  | 1440.69 | 0.01  | 1 | 73  | 2.10E-06 | 1 | R.YLAEFATGSDR.K.D               | 0.96 | F&H (2D-GIST) |
| gij24647885 | FBgn0020238 | 1089.52 | 2177.02 | 2177.02 | 0     | 0 | 28  | 0.045    | 1 | K.AAFDDAIAELDTLSEESYK.D         | 1.02 | R&H (2D-GIST) |
| gij24647885 | FBgn0020238 | 724.37  | 1446.73 | 1446.73 | 0.01  | 1 | 76  | 1.50E-06 | 1 | R.YLAEFATGSDR.K.D               | 1.19 | R&H (2D-GIST) |
| gij24647885 | FBgn0020238 | 754.9   | 1507.79 | 1507.77 | 0.01  | 0 | 39  | 0.0088   | 1 | R.DICSDILNVLEK.H                | 1.61 | R&H (2D-GIST) |
| gij24647885 | FBgn0020238 | 636.3   | 1270.59 | 1270.58 | 0.01  | 0 | 68  | 5.00E-06 | 1 | R.YLAEFATGSDR.K                 | 1.32 | R&L (2D-GIST) |
| gij24647885 | FBgn0020238 | 930.97  | 1859.92 | 1859.92 | 0     | 0 | 71  | 4.90E-06 | 1 | K.AASDIAMNDLPPTHPIR.L           | 1.17 | F&H (2D-GIST) |
| gij24647885 | FBgn0020238 | 932.48  | 1862.94 | 1862.94 | 0     | 0 | 50  | 0.00058  | 1 | K.AASDIAMNDLPPTHPIR.L           | 1.07 | R&H (2D-GIST) |
| gij24647885 | FBgn0020238 | 930.96  | 1859.91 | 1859.92 | -0.01 | 0 | 63  | 3.30E-05 | 1 | K.AASDIAMNDLPPTHPIR.L           | 1.43 | R&L (2D-GIST) |
| gij21355751 | FBgn0020254 | 818.9   | 1635.79 | 1635.8  | 0     | 0 | 76  | 1.30E-06 | 1 | K.NNAEQLGHAVGEISR.Y             | 0.69 | F&H (2D-GIST) |
| gij21355751 | FBgn0020254 | 664.38  | 1990.1  | 1990.1  | 0.01  | 0 | 61  | 2.10E-05 | 1 | K.NVGIALSQLLSSVLHNQR.S          | 0.92 | F&H (2D-GIST) |
| gij21355751 | FBgn0020254 | 996.07  | 1990.12 | 1990.1  | 0.02  | 0 | 91  | 1.70E-08 | 1 | K.NVGIALSQLLSSVLHNQR.S          | 1.14 | F&H (2D-GIST) |
| gij21355751 | FBgn0020254 | 1163.59 | 2325.16 | 2325.15 | 0.01  | 0 | 66  | 1.60E-05 | 1 | R.VGEATTHVLSTIAEEEEVPENR.D      | 0.65 | R&H (2D-GIST) |
| gij21355751 | FBgn0020254 | 954.55  | 1907.08 | 1907.07 | 0.02  | 0 | 105 | 9.50E-10 | 1 | R.LVAAATHSLVEAAQNLVR.G          | 1.02 | R&H (2D-GIST) |
| gij21355751 | FBgn0020254 | 1080.56 | 2159.11 | 2159.09 | 0.02  | 0 | 62  | 3.30E-05 | 1 | R.AMHSPPPVGNTQVGPEDLIR.V        | 1.15 | R&H (2D-GIST) |
| gij21355751 | FBgn0020254 | 996.06  | 1990.11 | 1990.1  | 0.01  | 0 | 94  | 1.00E-08 | 1 | K.NVGIALSQLLSSVLHNQR.S          | 0.83 | R&L (2D-GIST) |
| gij12643368 | FBgn0020367 | 681.39  | 1360.77 | 1360.77 | 0     | 0 | 50  | 0.00062  | 1 | K.LPANHPLLTGQR.V                | 1.01 | F&H (2D-GIST) |
| gij12643368 | FBgn0020367 | 944.95  | 1887.89 | 1887.88 | 0.01  | 0 | 85  | 1.40E-07 | 1 | K.ADFEQLHEDLQQAFR.N             | 0.97 | F&H (2D-GIST) |
| gij12643368 | FBgn0020367 | 946.46  | 1890.9  | 1890.89 | 0     | 0 | 81  | 3.10E-07 | 1 | K.ADFEQLHEDLQQAFR.N             | 0.98 | R&H (2D-GIST) |
| gij12643368 | FBgn0020367 | 1150.12 | 2298.22 | 2298.21 | 0.01  | 0 | 44  | 0.0023   | 1 | K.VGSHITGGDLYGLVHENTLVK.H       | 1.15 | R&H (2D-GIST) |
| gij24583992 | FBgn0020368 | 1143.11 | 2284.21 | 2284.2  | 0.01  | 0 | 43  | 0.0027   | 1 | R.VGSHITGGDLYGVHENTLVK.Q        | 0.80 | R&H (2D-GIST) |
| gij24583992 | FBgn0020368 | 943.53  | 2827.57 | 2827.55 | 0.02  | 0 | 29  | 0.018    | 1 | R.TGKPLSVELGPGMGSIFDGIQRPLR.D   | 1.07 | R&H (2D-GIST) |
| gij24583992 | FBgn0020368 | 696.87  | 1391.73 | 1391.73 | 0     | 0 | 42  | 0.0045   | 1 | K.LPANHPLFTGQR.V                | 0.71 | F&H (2D-GIST) |
| gij24583992 | FBgn0020368 | 654.85  | 1307.69 | 1307.68 | 0     | 0 | 39  | 0.0069   | 1 | K.HTMLQVWPVR.Q                  | 0.90 | F&H (2D-GIST) |
| gij24583992 | FBgn0020368 | 656.36  | 1310.7  | 1310.7  | 0     | 0 | 34  | 0.024    | 1 | K.HTMLQVWPVR.Q                  | 1.11 | R&H (2D-GIST) |
| gij2245467  | FBgn0020369 | 745.94  | 1489.87 | 1489.86 | 0     | 0 | 40  | 0.0016   | 1 | R.IDILDPALLRPGR.I               | 0.82 | F&H (2D-GIST) |
| gij2245467  | FBgn0020369 | 1075.03 | 2148.04 | 2148.02 | 0.01  | 0 | 66  | 9.60E-06 | 1 | R.EHAPSIIFMDEIDSIGSSR.I         | 0.70 | R&H (2D-GIST) |
| gij2245467  | FBgn0020369 | 747.45  | 1492.89 | 1492.88 | 0.01  | 0 | 35  | 0.0072   | 1 | R.IDILDPALLRPGR.I               | 0.91 | R&H (2D-GIST) |
| gij45551871 | FBgn0020385 | 853.97  | 1705.92 | 1705.92 | 0     | 0 | 66  | 1.50E-05 | 1 | K.AATEIGIDAAHVQLPR.S            | 1.06 | R&H (2D-GIST) |
| gij45551871 | FBgn0020385 | 782.39  | 2344.14 | 2344.13 | 0.01  | 0 | 68  | 7.30E-06 | 1 | R.VHGIIVQMPLDCDTPIDSHR.I        | 1.16 | F&H (2D-GIST) |
| gij45551871 | FBgn0020385 | 782.39  | 2344.14 | 2344.13 | 0.01  | 0 | 65  | 1.70E-05 | 1 | R.VHGIIVQMPLDCDTPIDSHR.I        | 0.73 | R&L (2D-GIST) |
| gij45551871 | FBgn0020385 | 783.39  | 2347.16 | 2347.15 | 0.01  | 0 | 68  | 7.70E-06 | 1 | R.VHGIIVQMPLDCDTPIDSHR.I        | 1.12 | R&H (2D-GIST) |
| gij24645757 | FBgn0020439 | 491.24  | 1470.71 | 1470.71 | 0     | 0 | 52  | 0.00024  | 1 | R.LDLCTDRPGSHR.S                | 0.80 | F&H (2D-GIST) |
| gij25090298 | FBgn0020439 | 868.97  | 1735.93 | 1735.93 | 0     | 0 | 44  | 0.0027   | 1 | K.EVHNISHYPRPAVK.Y              | 1.49 | F&H (2D-GIST) |
| gij25090298 | FBgn0020439 | 577.64  | 1729.89 | 1729.89 | 0     | 0 | 36  | 0.02     | 1 | K.EVHNISHYPRPAVK.Y              | 1.38 | F&H (2D-GIST) |

|             |             |         |         |         |       |   |     |          |   |                                |      |               |
|-------------|-------------|---------|---------|---------|-------|---|-----|----------|---|--------------------------------|------|---------------|
| gij25090298 | FBgn0020439 | 865.95  | 1729.89 | 1729.89 | 0     | 0 | 59  | 8.50E-05 | 1 | K.EVHNISHYPRPAVK.Y             | 2.10 | R&L (2D-GIST) |
| gij18860083 | FBgn0020513 | 747.88  | 1493.75 | 1493.75 | 0     | 1 | 34  | 0.02     | 1 | R.VSSAHKGPEETLR.I              | 0.91 | F&H (2D-GIST) |
| gij18860083 | FBgn0020513 | 764.72  | 2291.14 | 2291.15 | 0     | 1 | 35  | 0.02     | 1 | K.KDHLVVILMGASDISHSEK.I        | 1.01 | R&L (2D-GIST) |
| gij18860083 | FBgn0020513 | 767.96  | 1533.92 | 1533.9  | 0.02  | 1 | 43  | 0.00094  | 1 | R.RTLLLVFEILER.A               | 1.00 | F&H (2D-GIST) |
| gij2411487  | FBgn0020615 | 596.29  | 1785.84 | 1785.84 | 0     | 0 | 59  | 5.00E-05 | 1 | R.RPFDPTAHDLDASFR.L            | 0.73 | F&H (2D-GIST) |
| gij2411487  | FBgn0020615 | 813.07  | 2436.18 | 2436.17 | 0.01  | 0 | 59  | 5.60E-05 | 1 | M.SYAADVLNSAHLELHGGGDAELR.R    | 0.95 | F&H (2D-GIST) |
| gij2290597  | FBgn0020618 | 996.03  | 1990.05 | 1990.03 | 0.03  | 0 | 33  | 0.028    | 1 | R.GTLIGHNGWVTQIATNPK.D         | 0.97 | R&L (2D-GIST) |
| gij2290597  | FBgn0020618 | 1014.48 | 2026.94 | 2026.93 | 0.01  | 0 | 54  | 0.00016  | 1 | R.FSPNHSNPIIVSCGWDR.T          | 0.93 | F&H (2D-GIST) |
| gij2290597  | FBgn0020618 | 1014.48 | 2026.94 | 2026.93 | 0.01  | 0 | 68  | 5.00E-06 | 1 | R.FSPNHSNPIIVSCGWDR.T          | 0.83 | F&H (2D-GIST) |
| gij2290597  | FBgn0020618 | 1014.48 | 2026.94 | 2026.93 | 0.01  | 0 | 72  | 2.50E-06 | 1 | R.FSPNHSNPIIVSCGWDR.T          | 0.91 | R&L (2D-GIST) |
| gij2290597  | FBgn0020618 | 1454.17 | 2906.32 | 2906.3  | 0.02  | 0 | 62  | 1.30E-05 | 1 | K.NNHHGHNGYLNTVTVSPDGLCTSGGK.D | 0.83 | R&L (2D-GIST) |
| gij2290597  | FBgn0020618 | 969.78  | 2906.31 | 2906.3  | 0.01  | 0 | 111 | 1.30E-10 | 1 | K.NNHHGHNGYLNTVTVSPDGLCTSGGK.D | 0.98 | R&L (2D-GIST) |
| gij24583465 | FBgn0021953 | 734.09  | 2199.24 | 2199.21 | 0.02  | 0 | 46  | 0.00081  | 1 | R.LVFGNGLRPQIWPQVQR.F          | 1.29 | F&H (2D-GIST) |
| gij24583465 | FBgn0021953 | 1004.03 | 2006.04 | 2006.02 | 0.02  | 1 | 41  | 0.0049   | 1 | K.GRYELLTPQVYDQVQR.N           | 1.41 | F&H (2D-GIST) |
| gij24653944 | FBgn0022160 | 821.42  | 1640.83 | 1640.82 | 0.01  | 0 | 52  | 0.00042  | 1 | R.IHPEFPYIDAEIR.Y              | 0.70 | F&H (2D-GIST) |
| gij24653944 | FBgn0022160 | 971.03  | 1940.05 | 1940.05 | 0     | 0 | 84  | 1.90E-07 | 1 | R.NHIVHVSPSNLITIAGGK.W         | 0.77 | F&H (2D-GIST) |
| gij24653944 | FBgn0022160 | 950.96  | 1899.9  | 1899.9  | 0.01  | 0 | 79  | 5.50E-07 | 1 | K.SFGDGDVSGEQLHEILR.E          | 0.83 | F&H (2D-GIST) |
| gij24653944 | FBgn0022160 | 647.69  | 1940.05 | 1940.05 | 0     | 0 | 53  | 0.00028  | 1 | R.NHIVHVSPSNLITIAGGK.W         | 0.91 | F&H (2D-GIST) |
| gij24653944 | FBgn0022160 | 822.93  | 1643.85 | 1643.84 | 0.01  | 0 | 29  | 0.082    | 1 | R.IHPEFPYIDAEIR.Y              | 0.98 | R&H (2D-GIST) |
| gij24653944 | FBgn0022160 | 717.85  | 1433.68 | 1433.67 | 0     | 0 | 44  | 0.0016   | 1 | R.HGATVCNHVEVK.E               | 0.69 | F&H (2D-GIST) |
| gij24653944 | FBgn0022160 | 971.03  | 1940.05 | 1940.05 | 0     | 0 | 105 | 1.60E-09 | 1 | R.NHIVHVSPSNLITIAGGK.W         | 0.90 | R&L (2D-GIST) |
| gij24653944 | FBgn0022160 | 717.85  | 1433.68 | 1433.67 | 0.01  | 0 | 55  | 0.00012  | 1 | R.HGATVCNHVEVK.E               | 1.52 | R&L (2D-GIST) |
| gij24653944 | FBgn0022160 | 618.96  | 1853.85 | 1853.85 | 0     | 0 | 49  | 0.00042  | 1 | K.HATEFLANEMGHSVNR.T           | 1.07 | F&H (2D-GIST) |
| gij24653944 | FBgn0022160 | 619.96  | 1856.87 | 1856.87 | 0     | 0 | 47  | 0.00061  | 1 | K.HATEFLANEMGHSVNR.T           | 0.93 | R&H (2D-GIST) |
| gij2459912  | FBgn0022343 | 1016.52 | 2031.03 | 2031.03 | 0     | 0 | 38  | 0.0088   | 1 | R.YSQQAGSGLGGGPTGGALRPR.R      | 1.21 | F&H (2D-GIST) |
| gij2459912  | FBgn0022343 | 677.01  | 2028.02 | 2028.01 | 0     | 0 | 56  | 0.00015  | 1 | R.YSQQAGSGLGGGPTGGALRPR.R      | 1.00 | R&L (2D-GIST) |
| gij24762790 | FBgn0022343 | 921.47  | 2761.38 | 2761.39 | 0     | 1 | 38  | 0.0079   | 1 | R.RAAPDITNTEFFPTLSAARPEEQR.K   | 0.96 | F&H (2D-GIST) |
| gij3786400  | FBgn0022355 | 821.93  | 1641.85 | 1641.84 | 0.01  | 1 | 82  | 4.00E-07 | 1 | K.HKDAQLVCPSLER.R              | 1.44 | F&H (2D-GIST) |
| gij3786400  | FBgn0022355 | 794.4   | 1586.78 | 1586.77 | 0     | 1 | 32  | 0.043    | 1 | R.DRVDCELEIEQR.K               | 1.08 | F&H (2D-GIST) |
| gij3786400  | FBgn0022355 | 821.93  | 1641.85 | 1641.84 | 0.01  | 1 | 62  | 3.70E-05 | 1 | K.HKDAQLVCPSLER.R              | 0.86 | R&H (2D-GIST) |
| gij3786400  | FBgn0022355 | 795.9   | 1589.8  | 1589.79 | 0     | 1 | 39  | 0.0069   | 1 | R.DRVDCELEIEQR.K               | 1.06 | R&H (2D-GIST) |
| gij3786400  | FBgn0022355 | 795.9   | 1589.78 | 1589.79 | -0.01 | 1 | 43  | 0.0023   | 1 | R.DRVDCELEIEQR.K               | 1.33 | F&H (2D-GIST) |
| gij3786400  | FBgn0022355 | 794.4   | 1586.78 | 1586.77 | 0     | 1 | 36  | 0.015    | 1 | R.DRVDCELEIEQR.K               | 1.27 | R&L (2D-GIST) |
| gij24663131 | FBgn0022959 | 707.36  | 1412.71 | 1412.7  | 0     | 0 | 66  | 1.60E-05 | 1 | R.EDVVFVHQSAIAR.N              | 0.85 | F&H (2D-GIST) |
| gij2739396  | FBgn0022959 | 1146.55 | 2291.08 | 2291.06 | 0.02  | 0 | 48  | 0.00046  | 1 | R.GLGGDGSAAEPGVHDQNPEGLQR.G    | 0.80 | R&H (2D-GIST) |
| gij2739396  | FBgn0022959 | 763.69  | 2288.05 | 2288.04 | 0.01  | 0 | 55  | 8.80E-05 | 1 | R.GLGGDGSAAEPGVHDQNPEGLQR.G    | 0.80 | R&L (2D-GIST) |
| gij24663131 | FBgn0022959 | 708.87  | 1415.72 | 1415.72 | 0     | 0 | 36  | 0.015    | 1 | R.EDVVFVHQSAIAR.N              | 1.02 | F&H (2D-GIST) |
| gij24663131 | FBgn0022959 | 708.87  | 1415.73 | 1415.72 | 0.01  | 0 | 61  | 4.70E-05 | 1 | R.EDVVFVHQSAIAR.N              | 1.03 | R&H (2D-GIST) |
| gij2739396  | FBgn0022959 | 602.3   | 1202.58 | 1202.58 | 0     | 1 | 46  | 0.0019   | 1 | R.RYNNYYLR.Q                   | 0.83 | F&H (2D-GIST) |



|             |             |         |         |         |       |   |    |          |   |                                 |      |               |
|-------------|-------------|---------|---------|---------|-------|---|----|----------|---|---------------------------------|------|---------------|
| gij2739396  | FBgn0022959 | 815.72  | 2444.14 | 2444.14 | -0.01 | 1 | 28 | 0.053    | 1 | R.RGLGGDGS AEPGVHDQNPEGLQR.G    | 1.47 | F&H (2D-GIST) |
| gij24654417 | FBgn0022987 | 887.35  | 1772.69 | 1772.69 | 0     | 0 | 53 | 7.90E-06 | 1 | R.GGHYESSDYEPDYGR.R             | 1.28 | F&H (2D-GIST) |
| gij24654417 | FBgn0022987 | 643.93  | 1928.78 | 1928.79 | -0.01 | 1 | 37 | 0.00042  | 1 | R.GGHYESSDYEPDYGR.R             | 1.47 | F&H (2D-GIST) |
| gij17137462 | FBgn0023023 | 737.91  | 1473.81 | 1473.81 | 0.01  | 1 | 62 | 3.20E-05 | 1 | K.KVPIHLQSAQNR.V                | 0.91 | F&H (2D-GIST) |
| gij17137462 | FBgn0023023 | 995.17  | 2982.5  | 2982.49 | 0.01  | 0 | 61 | 3.80E-05 | 1 | R.LLAEGINGPEGHELSPREEVEAEAVHR.A | 0.90 | R&H (2D-GIST) |
| gij28573937 | FBgn0023143 | 814.92  | 1627.82 | 1627.82 | 0     | 0 | 46 | 0.0021   | 1 | R.TVSHTGPLTEEFLLR.K             | 0.92 | F&H (2D-GIST) |
| gij2706522  | FBgn0023143 | 816.43  | 1630.85 | 1630.84 | 0.01  | 0 | 46 | 0.0015   | 1 | R.TVSHTGPLTEEFLLR.K             | 1.05 | R&H (2D-GIST) |
| gij28573937 | FBgn0023143 | 848.96  | 1695.91 | 1695.89 | 0.01  | 0 | 71 | 4.50E-06 | 1 | K.FAHENGIALIIAETR.G             | 0.71 | F&H (2D-GIST) |
| gij28573937 | FBgn0023143 | 883.47  | 1764.92 | 1764.93 | -0.01 | 0 | 46 | 0.0017   | 1 | R.QLFRPHDVQKPK.S                | 0.72 | F&H (2D-GIST) |
| gij28573937 | FBgn0023143 | 869.94  | 1737.87 | 1737.86 | 0.01  | 0 | 61 | 4.40E-05 | 1 | K.NFPNIEHTLQWAR.D               | 0.76 | F&H (2D-GIST) |
| gij28573937 | FBgn0023143 | 888     | 1773.99 | 1773.99 | 0     | 0 | 35 | 0.016    | 1 | R.QLFRPHDVQKPK.S                | 0.94 | R&H (2D-GIST) |
| gij28573937 | FBgn0023143 | 814.92  | 1627.82 | 1627.82 | 0     | 0 | 65 | 2.10E-05 | 1 | R.TVSHTGPLTEEFLLR.K             | 1.12 | R&L (2D-GIST) |
| gij28573937 | FBgn0023143 | 848.96  | 1695.9  | 1695.89 | 0.01  | 0 | 69 | 7.70E-06 | 1 | K.FAHENGIALIIAETR.G             | 1.25 | R&L (2D-GIST) |
| gij2706522  | FBgn0023143 | 652.8   | 1303.58 | 1303.58 | 0     | 0 | 50 | 0.00019  | 1 | K.SFAHCVEWAR.L                  | 1.13 | R&L (2D-GIST) |
| gij28573937 | FBgn0023143 | 889.45  | 2665.32 | 2665.31 | 0.01  | 0 | 56 | 0.00011  | 1 | K.AHNGALPRPWNEEDANSFLEVVR.A     | 1.24 | F&H (2D-GIST) |
| gij17864358 | FBgn0024556 | 981.17  | 2940.5  | 2940.47 | 0.03  | 0 | 53 | 0.00025  | 1 | K.STVTGVEMFHQILEEAQAGDQLGALVR.G | 0.99 | R&L (2D-GIST) |
| gij16183707 | FBgn0024556 | 991.98  | 1981.95 | 1981.94 | 0.01  | 0 | 39 | 0.0065   | 1 | R.TKPHCNVGTIGHVDHGK.T           | 0.73 | F&H (2D-GIST) |
| gij16183707 | FBgn0024556 | 927.9   | 1853.78 | 1853.78 | 0     | 0 | 67 | 1.10E-06 | 1 | R.HYGHTDCPGHADIYK.N             | 0.75 | F&H (2D-GIST) |
| gij17864358 | FBgn0024556 | 661.66  | 1981.95 | 1981.94 | 0.01  | 0 | 51 | 0.00034  | 1 | R.TKPHCNVGTIGHVDHGK.T           | 1.42 | R&L (2D-GIST) |
| gij28317134 | FBgn0024733 | 819.41  | 1636.8  | 1636.8  | 0     | 0 | 75 | 1.90E-06 | 1 | K.YRPEHGPIAAWEK.A               | 0.82 | F&H (2D-GIST) |
| gij28317134 | FBgn0024733 | 549.32  | 1096.64 | 1096.64 | 0     | 1 | 31 | 0.041    | 1 | K.AQVIEALRR.A                   | 1.16 | F&H (2D-GIST) |
| gij28317134 | FBgn0024733 | 550.83  | 1099.65 | 1099.65 | 0     | 1 | 28 | 0.075    | 1 | K.AQVIEALRR.A                   | 0.92 | R&H (2D-GIST) |
| gij28574756 | FBgn0024733 | 819.41  | 1636.8  | 1636.8  | 0     | 0 | 80 | 6.40E-07 | 1 | K.YRPEHGPIAAWEK.A               | 1.03 | R&L (2D-GIST) |
| gij28317134 | FBgn0024733 | 819.41  | 1636.8  | 1636.8  | 0     | 0 | 48 | 0.00094  | 1 | K.YRPEHGPIAAWEK.A               | 1.40 | R&L (2D-GIST) |
| gij3337433  | FBgn0024923 | 766.91  | 1531.81 | 1531.8  | 0.01  | 0 | 50 | 0.00058  | 1 | R.IVSQLLTMDGMK.K                | 0.97 | F&H (2D-GIST) |
| gij3337433  | FBgn0024923 | 854.15  | 2559.44 | 2559.43 | 0.01  | 0 | 48 | 0.00021  | 1 | K.NVFIIGATNRPDIIDPAILRPGRL      | 0.90 | F&H (2D-GIST) |
| gij27374245 | FBgn0024923 | 854.15  | 2559.44 | 2559.43 | 0.01  | 0 | 41 | 0.00094  | 1 | K.NVFIIGATNRPDIIDPAILRPGRL      | 0.92 | R&L (2D-GIST) |
| gij45551179 | FBgn0025704 | 992.99  | 1983.97 | 1983.95 | 0.01  | 2 | 29 | 0.057    | 1 | K.YQSIRDEITEDKFTR.V             | 0.96 | F&H (2D-GIST) |
| gij45551179 | FBgn0025704 | 939.91  | 1877.8  | 1877.79 | 0     | 0 | 78 | 8.00E-08 | 1 | R.GHPEEYTDGMNLGEER.F            | 0.67 | R&H (2D-GIST) |
| gij3676167  | FBgn0025725 | 875.51  | 1749.01 | 1749    | 0.01  | 0 | 42 | 0.002    | 1 | R.LLELAPRPDVAQQVR.K             | 0.92 | R&H (2D-GIST) |
| gij3676167  | FBgn0025725 | 690.37  | 1378.72 | 1378.72 | 0     | 1 | 30 | 0.059    | 1 | R.KYDEVLHMVR.N                  | 1.18 | F&H (2D-GIST) |
| gij3676167  | FBgn0025725 | 556.95  | 1667.82 | 1667.82 | 0     | 0 | 39 | 0.0066   | 1 | R.GHYNNVSSVLFHPR.Q              | 1.17 | F&H (2D-GIST) |
| gij3676167  | FBgn0025725 | 556.95  | 1667.82 | 1667.82 | 0     | 0 | 31 | 0.035    | 1 | R.GHYNNVSSVLFHPR.Q              | 0.92 | R&L (2D-GIST) |
| gij24644504 | FBgn0026077 | 729.39  | 1456.76 | 1456.75 | 0.01  | 1 | 59 | 0.00011  | 1 | R.KSELLAGLNSEGR.T               | 0.82 | F&H (2D-GIST) |
| gij24644504 | FBgn0026077 | 729.39  | 1456.76 | 1456.75 | 0.01  | 1 | 82 | 5.10E-07 | 1 | R.KSELLAGLNSEGR.T               | 1.17 | R&L (2D-GIST) |
| gij4191331  | FBgn0026077 | 1094.97 | 2187.92 | 2187.9  | 0.02  | 0 | 41 | 0.00031  | 1 | K.YLTENCDYLHNVDGDR.T            | 1.07 | F&H (2D-GIST) |
| gij4191331  | FBgn0026077 | 840.41  | 1678.8  | 1678.8  | 0     | 0 | 59 | 5.80E-05 | 1 | R.TELEPITTPHCSR.L               | 0.90 | F&H (2D-GIST) |
| gij4191331  | FBgn0026077 | 1094.96 | 2187.91 | 2187.9  | 0     | 0 | 59 | 3.00E-06 | 1 | K.YLTENCDYLHNVDGDR.T            | 0.80 | R&H (2D-GIST) |
| gij24644504 | FBgn0026077 | 841.92  | 1681.82 | 1681.82 | 0     | 0 | 36 | 0.011    | 1 | R.TELEPITTPHCSR.L               | 0.85 | F&H (2D-GIST) |

|             |             |         |         |         |       |   |    |          |   |                                             |      |               |
|-------------|-------------|---------|---------|---------|-------|---|----|----------|---|---------------------------------------------|------|---------------|
| gii4191331  | FBgn0026077 | 841.92  | 1681.82 | 1681.82 | 0.01  | 0 | 52 | 0.00035  | 1 | R.TELEPPITTPHCSR.L                          | 1.19 | R&H (2D-GIST) |
| gii4191331  | FBgn0026077 | 1269.9  | 3806.69 | 3806.68 | 0.01  | 1 | 53 | 2.90E-05 | 1 | K.YLTENC DYLNVD CGDRTELEPPITTPHCSR.L        | 1.12 | F&H (2D-GIST) |
| gii4191331  | FBgn0026077 | 1268.88 | 3803.63 | 3803.66 | -0.04 | 1 | 57 | 5.40E-06 | 1 | K.YLTENC DYLNVD CGDRTELEPPITTPHCSR.L        | 1.28 | R&L (2D-GIST) |
| gii4160434  | FBgn0026210 | 1033.55 | 2065.09 | 2065.09 | 0     | 0 | 57 | 0.00013  | 1 | K.APSSLLDALEQHLATLEGR.K                     | 1.30 | F&H (2D-GIST) |
| gii4160434  | FBgn0026210 | 689.37  | 2065.1  | 2065.09 | 0.01  | 0 | 48 | 0.00088  | 1 | K.APSSLLDALEQHLATLEGR.K                     | 0.72 | R&H (2D-GIST) |
| gii4160434  | FBgn0026210 | 1033.55 | 2065.1  | 2065.09 | 0.01  | 0 | 87 | 1.10E-07 | 1 | K.APSSLLDALEQHLATLEGR.K                     | 0.79 | R&H (2D-GIST) |
| gii21711801 | FBgn0026210 | 596.64  | 1786.89 | 1786.89 | 0     | 0 | 39 | 0.0064   | 1 | K.SLITTHHLMAYGNER.F                         | 0.74 | R&H (2D-GIST) |
| gii21711801 | FBgn0026210 | 1038.21 | 3111.62 | 3111.6  | 0.02  | 0 | 49 | 0.00048  | 1 | K.HLDYLVHCTNPNVSIPHLANLLIER.S               | 0.95 | R&H (2D-GIST) |
| gii4378006  | FBgn0026372 | 952.04  | 1902.06 | 1902.05 | 0.01  | 1 | 80 | 4.30E-07 | 1 | K.KIEDNNTLVFLTHLR.A                         | 0.62 | F&H (2D-GIST) |
| gii24655502 | FBgn0026372 | 863.96  | 1725.91 | 1725.9  | 0     | 0 | 53 | 0.00037  | 1 | K.IEDNNTLVFLTHLR.A                          | 1.33 | F&H (2D-GIST) |
| gii4092093  | FBgn0026415 | 708.41  | 1414.81 | 1414.81 | 0     | 0 | 41 | 0.0031   | 1 | R.IPFINSAHSLVK.T                            | 0.61 | R&H (2D-GIST) |
| gii4092093  | FBgn0026415 | 656.36  | 1310.7  | 1310.69 | 0.01  | 0 | 35 | 0.02     | 1 | K.YLTLESSNARI                               | 0.74 | R&H (2D-GIST) |
| gii4092093  | FBgn0026415 | 771.38  | 1540.75 | 1540.75 | 0     | 1 | 63 | 2.20E-05 | 1 | R.GGCTGHDKFPILR.Q                           | 0.69 | F&H (2D-GIST) |
| gii4092093  | FBgn0026415 | 774.4   | 1546.79 | 1546.78 | 0     | 1 | 81 | 4.90E-07 | 1 | R.GGCTGHDKFPILR.Q                           | 0.74 | R&H (2D-GIST) |
| gii4753683  | FBgn0026418 | 790.47  | 1578.92 | 1578.91 | 0.02  | 0 | 42 | 0.001    | 1 | K.ALLDAAQIAGLNVLR.L                         | 0.83 | F&H (2D-GIST) |
| gii4753683  | FBgn0026418 | 791.98  | 1581.94 | 1581.93 | 0.01  | 0 | 32 | 0.012    | 1 | K.ALLDAAQIAGLNVLR.L                         | 1.28 | R&H (2D-GIST) |
| gii4753683  | FBgn0026418 | 693.7   | 2078.08 | 2078.08 | 0     | 1 | 43 | 0.0034   | 1 | R.KFNDPHVQHELTSIPAR.V                       | 0.98 | F&H (2D-GIST) |
| gii4753683  | FBgn0026418 | 693.7   | 2078.08 | 2078.08 | 0     | 1 | 33 | 0.037    | 1 | R.KFNDPHVQHELTSIPAR.V                       | 0.90 | R&H (2D-GIST) |
| gii4753683  | FBgn0026418 | 634.99  | 1901.94 | 1901.94 | 0     | 0 | 30 | 0.072    | 1 | K.FNDPHVQHELTSIPAR.V                        | 1.09 | R&L (2D-GIST) |
| gii7290712  | FBgn0026708 | 671.39  | 1340.76 | 1340.75 | 0.01  | 0 | 63 | 2.40E-05 | 1 | R.ALGVLASLVWDR.A                            | 0.65 | F&H (2D-GIST) |
| gii7290712  | FBgn0026708 | 816.93  | 1631.84 | 1631.83 | 0.01  | 0 | 48 | 0.0011   | 1 | K.HLPEDETFQLVSK.I                           | 0.90 | R&H (2D-GIST) |
| gii7290712  | FBgn0026708 | 867.46  | 1732.91 | 1732.89 | 0.02  | 0 | 40 | 0.008    | 1 | K.ALVTETSVLDADEGIR.F                        | 0.93 | R&H (2D-GIST) |
| gii7290712  | FBgn0026708 | 671.39  | 1340.76 | 1340.75 | 0.01  | 0 | 49 | 0.00065  | 1 | R.ALGVLASLVWDR.A                            | 1.24 | R&L (2D-GIST) |
| gii7290712  | FBgn0026708 | 741.4   | 1480.78 | 1480.78 | 0     | 0 | 44 | 0.0021   | 1 | K.SGQVVPGYGHAVLR.K                          | 0.77 | F&H (2D-GIST) |
| gii7290712  | FBgn0026708 | 1314.33 | 3939.97 | 3939.94 | 0.03  | 0 | 72 | 1.80E-06 | 1 | R.AALPQHVV TMLNNMPTTLHPMSQFAAAV T ALNHDSK.F | 1.04 | F&H (2D-GIST) |
| gii7290712  | FBgn0026708 | 1316.32 | 3945.95 | 3945.98 | -0.03 | 0 | 71 | 2.70E-06 | 1 | R.AALPQHVV TMLNNMPTTLHPMSQFAAAV T ALNHDSK.F | 0.74 | R&H (2D-GIST) |
| gii7290712  | FBgn0026708 | 742.91  | 1483.8  | 1483.8  | 0     | 0 | 51 | 0.00052  | 1 | K.SGQVVPGYGHAVLR.K                          | 0.91 | R&H (2D-GIST) |
| gii4929308  | FBgn0026781 | 734.4   | 1466.79 | 1466.79 | 0.01  | 0 | 59 | 6.00E-05 | 1 | K.NIVPETVTHLFR.I                            | 0.85 | F&H (2D-GIST) |
| gii4929308  | FBgn0026781 | 599.81  | 1197.62 | 1197.61 | 0     | 0 | 44 | 0.0021   | 1 | R.HITIF SPEGR.L                             | 0.95 | F&H (2D-GIST) |
| gii4929308  | FBgn0026781 | 599.82  | 1197.62 | 1197.61 | 0     | 0 | 44 | 0.0022   | 1 | R.HITIF SPEGR.L                             | 1.07 | R&L (2D-GIST) |
| gii4929308  | FBgn0026781 | 734.41  | 1466.8  | 1466.79 | 0.01  | 0 | 72 | 2.80E-06 | 1 | K.NIVPETVTHLFR.I                            | 1.17 | R&L (2D-GIST) |
| gii24664462 | FBgn0027088 | 794.89  | 1587.77 | 1587.76 | 0     | 0 | 80 | 4.70E-07 | 1 | R.SAYDLGQHTAATGVR.L                         | 0.68 | F&H (2D-GIST) |
| gii24664462 | FBgn0027088 | 1122.6  | 2243.18 | 2243.17 | 0.01  | 0 | 38 | 0.0086   | 1 | K.TVHVEEFIPSVV E P SFGIGR.I                 | 1.05 | R&H (2D-GIST) |
| gii21356425 | FBgn0027552 | 1088.09 | 2174.17 | 2174.16 | 0.01  | 0 | 70 | 6.00E-06 | 1 | K.IKPIHNQIECHPALNQK.K                       | 1.43 | R&H (2D-GIST) |
| gii21356425 | FBgn0027552 | 630.84  | 1259.67 | 1259.67 | 0     | 0 | 51 | 0.0006   | 1 | R.ATLHAIDVG YR.H                            | 0.83 | F&H (2D-GIST) |
| gii21356425 | FBgn0027552 | 629.34  | 1256.66 | 1256.65 | 0.01  | 0 | 40 | 0.0072   | 1 | R.ATLHAIDVG YR.H                            | 1.19 | R&L (2D-GIST) |
| gii21356425 | FBgn0027552 | 669.31  | 1336.6  | 1336.6  | 0     | 0 | 33 | 0.011    | 1 | K.LWCHFHEPK.R                               | 1.64 | R&L (2D-GIST) |
| gii19920676 | FBgn0027560 | 1084.55 | 2167.09 | 2167.08 | 0.02  | 0 | 38 | 0.0079   | 1 | K.ATEAHCALEARPPVQWNK.G                      | 0.54 | R&H (2D-GIST) |
| gii19920676 | FBgn0027560 | 765.39  | 1528.77 | 1528.76 | 0.01  | 0 | 74 | 2.70E-06 | 1 | K.IFWPLFHSM PGR.A                           | 0.60 | F&H (2D-GIST) |

|             |             |         |         |         |       |   |     |          |   |                                       |      |               |
|-------------|-------------|---------|---------|---------|-------|---|-----|----------|---|---------------------------------------|------|---------------|
| gii19920676 | FBgn0027560 | 982.47  | 1962.93 | 1962.91 | 0.01  | 0 | 31  | 0.023    | 1 | R.ANFGGEHWHDYVTVNK.H                  | 0.54 | R&H (2D-GIST) |
| gii19920676 | FBgn0027560 | 766.91  | 1531.8  | 1531.78 | 0.01  | 0 | 59  | 7.60E-05 | 1 | K.IFWPLFHSMMPGR.A                     | 0.72 | R&H (2D-GIST) |
| gii19920632 | FBgn0027571 | 796.91  | 1591.81 | 1591.81 | 0     | 0 | 58  | 0.0001   | 1 | R.AAPQLDLGGGHYVPR.Q                   | 0.66 | F&H (2D-GIST) |
| gii19920632 | FBgn0027571 | 1183.63 | 2365.25 | 2365.24 | 0.02  | 0 | 140 | 4.70E-13 | 1 | R.MLLELTHEAIIDAGLNPSDLR.G             | 0.83 | R&H (2D-GIST) |
| gii19920632 | FBgn0027571 | 798.42  | 1594.82 | 1594.83 | -0.01 | 0 | 36  | 0.018    | 1 | R.AAPQLDLGGGHYVPR.Q                   | 0.93 | R&H (2D-GIST) |
| gii19920632 | FBgn0027571 | 788.42  | 2362.23 | 2362.22 | 0.01  | 0 | 49  | 0.0006   | 1 | R.MLLELTHEAIIDAGLNPSDLR.G             | 0.70 | R&L (2D-GIST) |
| gii19920632 | FBgn0027571 | 786.37  | 1570.72 | 1570.72 | 0     | 0 | 50  | 0.00028  | 1 | K.MAAVGLSWEDAHSR.V                    | 0.97 | F&H (2D-GIST) |
| gii19920632 | FBgn0027571 | 798.42  | 1594.83 | 1594.83 | 0.01  | 0 | 48  | 0.0013   | 1 | R.AAPQLDLGGGHYVPR.Q                   | 0.86 | R&H (2D-GIST) |
| gii19920632 | FBgn0027571 | 742.39  | 1482.76 | 1482.77 | 0     | 0 | 90  | 7.10E-08 | 1 | K.TPVVMENLVFHR.A                      | 0.85 | R&L (2D-GIST) |
| gii19920632 | FBgn0027571 | 523.78  | 1045.55 | 1045.55 | 0     | 0 | 33  | 0.035    | 1 | K.AIPNHFFR.G                          | 0.90 | R&H (2D-GIST) |
| gii24652216 | FBgn0027580 | 973.95  | 1945.89 | 1945.88 | 0.01  | 0 | 51  | 0.0002   | 1 | K.ENDVDAVHPGYGFLSER.S                 | 1.08 | F&H (2D-GIST) |
| gii24652216 | FBgn0027580 | 1199.14 | 2396.27 | 2396.26 | 0.01  | 0 | 57  | 9.20E-05 | 1 | K.SVVEYLQGSIGIPHGFPPEPLR.S            | 0.66 | R&H (2D-GIST) |
| gii24652216 | FBgn0027580 | 975.44  | 1948.87 | 1948.9  | -0.02 | 0 | 49  | 0.00023  | 1 | K.ENDVDAVHPGYGFLSER.S                 | 0.88 | R&H (2D-GIST) |
| gii24652216 | FBgn0027580 | 1205.12 | 2408.23 | 2408.23 | 0     | 0 | 40  | 0.0074   | 1 | K.FLHGVLDTYFIDEHPQLFK.F               | 1.03 | R&H (2D-GIST) |
| gii24652216 | FBgn0027580 | 601.82  | 1201.63 | 1201.63 | 0     | 0 | 53  | 0.00028  | 1 | K.AGNVVHLYER.D                        | 0.92 | F&H (2D-GIST) |
| gii24652216 | FBgn0027580 | 658.3   | 1314.58 | 1314.58 | 0     | 0 | 30  | 0.014    | 1 | R.FLHECPWER.L                         | 1.40 | R&L (2D-GIST) |
| gii19921088 | FBgn0027611 | 1082.07 | 2162.13 | 2162.12 | 0.02  | 0 | 63  | 2.20E-05 | 1 | R.FALTYNPLAHTVNEYVR.I                 | 1.16 | F&H (2D-GIST) |
| gii19921088 | FBgn0027611 | 985.99  | 1969.97 | 1969.97 | 0.01  | 0 | 61  | 3.30E-05 | 1 | R.ETLGIMQHHDAITGTEK.E                 | 1.06 | R&H (2D-GIST) |
| gii19921088 | FBgn0027611 | 485.25  | 968.49  | 968.49  | 0     | 0 | 31  | 0.027    | 1 | K.HHLFFGK.S                           | 1.25 | F&H (2D-GIST) |
| gii19921088 | FBgn0027611 | 485.25  | 968.49  | 968.49  | 0     | 0 | 41  | 0.0025   | 1 | K.HHLFFGK.S                           | 1.00 | R&L (2D-GIST) |
| gii18858089 | FBgn0028342 | 542.28  | 1082.54 | 1082.54 | 0     | 0 | 56  | 0.0001   | 1 | K.TFYDAAVVR.Q                         | 0.60 | F&H (2D-GIST) |
| gii18858089 | FBgn0028342 | 783.95  | 1565.88 | 1565.87 | 0.01  | 0 | 66  | 9.00E-06 | 1 | K.AQAAIAVEVAELVK.A                    | 0.73 | F&H (2D-GIST) |
| gii18858089 | FBgn0028342 | 775.77  | 2324.3  | 2324.27 | 0.03  | 0 | 30  | 0.018    | 1 | K.HVPTLAVLKPQVQVENDGK.T               | 1.14 | F&H (2D-GIST) |
| gii18858089 | FBgn0028342 | 778.79  | 2333.34 | 2333.33 | 0.01  | 0 | 49  | 0.00019  | 1 | K.HVPTLAVLKPQVQVENDGK.T               | 0.78 | R&H (2D-GIST) |
| gii18858089 | FBgn0028342 | 542.28  | 1082.55 | 1082.54 | 0.01  | 0 | 47  | 0.00078  | 1 | K.TFYDAAVVR.Q                         | 0.81 | R&L (2D-GIST) |
| gii24583079 | FBgn0028479 | 734.88  | 1467.75 | 1467.73 | 0.01  | 0 | 31  | 0.045    | 1 | K.VVGMHYFSPVDK.M                      | 0.73 | R&H (2D-GIST) |
| gii24583079 | FBgn0028479 | 939.53  | 1877.05 | 1877.04 | 0.01  | 0 | 46  | 0.00084  | 1 | K.LGLPEVMLGLLPGGGTVR.L                | 0.91 | R&L (2D-GIST) |
| gii24583079 | FBgn0028479 | 883.48  | 1764.95 | 1764.95 | 0     | 1 | 29  | 0.066    | 1 | K.RGTRPVNNDALIVK.Q                    | 1.03 | F&H (2D-GIST) |
| gii19920670 | FBgn0028482 | 992.54  | 2974.59 | 2974.58 | 0.01  | 0 | 28  | 0.052    | 1 | K.VQVLA VGTETQQSVPSELLIDVPSQR.K       | 1.13 | R&H (2D-GIST) |
| gii19920670 | FBgn0028482 | 745.38  | 1488.75 | 1488.75 | 0     | 0 | 47  | 0.0013   | 1 | R.LHLVENHPEFGR.A                      | 0.81 | F&H (2D-GIST) |
| gii19920670 | FBgn0028482 | 497.26  | 1488.75 | 1488.75 | 0     | 0 | 30  | 0.066    | 1 | R.LHLVENHPEFGR.A                      | 0.93 | F&H (2D-GIST) |
| gii19920670 | FBgn0028482 | 746.89  | 1491.77 | 1491.77 | 0     | 0 | 55  | 0.00023  | 1 | R.LHLVENHPEFGR.A                      | 0.75 | R&H (2D-GIST) |
| gii19920670 | FBgn0028482 | 497.26  | 1488.75 | 1488.75 | 0     | 0 | 33  | 0.032    | 1 | R.LHLVENHPEFGR.A                      | 0.93 | R&L (2D-GIST) |
| gii19921306 | FBgn0028544 | 1132.13 | 2262.24 | 2262.22 | 0.02  | 0 | 55  | 9.80E-05 | 1 | K.AVNVQVPVHVDRPYPVYVK.V               | 0.60 | F&H (2D-GIST) |
| gii19921306 | FBgn0028544 | 1135.13 | 2268.24 | 2268.25 | -0.01 | 0 | 30  | 0.041    | 1 | K.AVNVQVPVHVDRPYPVYVK.V               | 0.87 | R&H (2D-GIST) |
| gii19921306 | FBgn0028544 | 1282.06 | 3843.16 | 3843.11 | 0.05  | 0 | 51  | 2.00E-05 | 1 | K.VPVHVVPDRPVPVEVPRPYPVPVAKPYPVYVEK.A | 1.31 | R&L (2D-GIST) |
| gii19921306 | FBgn0028544 | 708.05  | 2121.14 | 2121.14 | 0     | 0 | 36  | 0.013    | 1 | K.GIPVPVHVDRPYPVVEHEK.R               | 0.71 | F&H (2D-GIST) |
| gii19921306 | FBgn0028544 | 1061.58 | 2121.14 | 2121.14 | 0.01  | 0 | 40  | 0.0048   | 1 | K.GIPVPVHVDRPYPVVEHEK.R               | 0.72 | F&H (2D-GIST) |
| gii19921306 | FBgn0028544 | 1064.59 | 2127.18 | 2127.17 | 0     | 0 | 54  | 0.00019  | 1 | K.GIPVPVHVDRPYPVVEHEK.R               | 0.83 | R&H (2D-GIST) |

|             |             |         |         |         |       |   |    |          |   |                                 |      |               |
|-------------|-------------|---------|---------|---------|-------|---|----|----------|---|---------------------------------|------|---------------|
| gij19921306 | FBgn0028544 | 710.07  | 2127.18 | 2127.17 | 0     | 0 | 33 | 0.022    | 1 | K.GIPVPVHVDRPYPVVEK.R           | 0.89 | R&H (2D-GIST) |
| gij6523177  | FBgn0028646 | 1301.68 | 2601.34 | 2601.31 | 0.03  | 0 | 92 | 3.40E-08 | 1 | K.ITTPLEQAAASVTTENLDHIGGYR.A    | 0.86 | R&H (2D-GIST) |
| gij6523177  | FBgn0028646 | 576.27  | 1150.52 | 1150.52 | 0     | 0 | 34 | 0.012    | 1 | R.HEGFMGLYR.G                   | 0.87 | R&L (2D-GIST) |
| gij18860063 | FBgn0028686 | 743.37  | 1484.73 | 1484.73 | 0     | 1 | 46 | 0.0016   | 1 | K.EYLHAQEEVKR.I                 | 0.80 | F&H (2D-GIST) |
| gij18860063 | FBgn0028686 | 718.9   | 1435.78 | 1435.78 | 0     | 0 | 29 | 0.058    | 1 | R.ADTLDPALLRPGR.L               | 0.92 | F&H (2D-GIST) |
| gij18860063 | FBgn0028686 | 743.37  | 1484.73 | 1484.73 | 0     | 1 | 38 | 0.0092   | 1 | K.EYLHAQEEVKR.I                 | 1.13 | F&H (2D-GIST) |
| gij18860063 | FBgn0028686 | 746.39  | 1490.77 | 1490.76 | 0.01  | 1 | 41 | 0.0048   | 1 | K.EYLHAQEEVKR.I                 | 0.90 | R&H (2D-GIST) |
| gij21355773 | FBgn0028688 | 809.44  | 1616.87 | 1616.86 | 0.01  | 0 | 81 | 5.50E-07 | 1 | R.LGLFYLDHDLITR.N               | 1.02 | F&H (2D-GIST) |
| gij21355773 | FBgn0028688 | 584.35  | 1166.68 | 1166.68 | 0     | 0 | 44 | 0.0012   | 1 | R.LDIVFHLIR.L                   | 0.83 | F&H (2D-GIST) |
| gij21355773 | FBgn0028688 | 456.91  | 1367.7  | 1367.7  | 0     | 0 | 49 | 0.00062  | 1 | R.LDYLIHPHYR.Y                  | 0.97 | F&H (2D-GIST) |
| gij21355773 | FBgn0028688 | 684.86  | 1367.7  | 1367.7  | 0     | 0 | 52 | 0.00028  | 1 | R.LDYLIHPHYR.Y                  | 0.65 | R&L (2D-GIST) |
| gij21355773 | FBgn0028688 | 456.91  | 1367.7  | 1367.7  | 0     | 0 | 46 | 0.0013   | 1 | R.LDYLIHPHYR.Y                  | 1.25 | R&L (2D-GIST) |
| gij11245459 | FBgn0028692 | 640.87  | 1279.72 | 1279.72 | 0     | 0 | 58 | 4.40E-05 | 1 | K.LTATASLGVHR.G                 | 1.47 | F&H (2D-GIST) |
| gij11245459 | FBgn0028692 | 798.93  | 1595.84 | 1595.83 | 0.01  | 0 | 64 | 3.70E-05 | 1 | K.LLHVAVSDVNDDVR.R              | 1.02 | R&H (2D-GIST) |
| gij11245459 | FBgn0028692 | 640.87  | 1279.73 | 1279.72 | 0     | 0 | 37 | 0.0053   | 1 | K.LTATASLGVHR.G                 | 1.02 | R&L (2D-GIST) |
| gij10334981 | FBgn0028692 | 970.47  | 2908.4  | 2908.4  | -0.01 | 0 | 73 | 1.90E-06 | 1 | R.VSICHTATVIANAFMHS GTTSDQFLR.D | 0.98 | F&H (2D-GIST) |
| gij10334981 | FBgn0028692 | 969.47  | 2905.4  | 2905.39 | 0.01  | 0 | 62 | 2.70E-05 | 1 | R.VSICHTATVIANAFMHS GTTSDQFLR.D | 0.63 | R&L (2D-GIST) |
| gij11245459 | FBgn0028692 | 545.93  | 1634.78 | 1634.78 | 0     | 0 | 36 | 0.012    | 1 | R.HGGCLGLGLAGMGTHR.Q            | 1.10 | F&H (2D-GIST) |
| gij11245459 | FBgn0028692 | 545.93  | 1634.78 | 1634.78 | 0     | 0 | 60 | 4.90E-05 | 1 | R.HGGCLGLGLAGMGTHR.Q            | 1.00 | R&L (2D-GIST) |
| gij21356859 | FBgn0028695 | 770.97  | 1539.93 | 1539.91 | 0.01  | 0 | 31 | 0.013    | 1 | R.AVPLALGLISASNP.K.L            | 0.56 | F&H (2D-GIST) |
| gij21356859 | FBgn0028695 | 1050.58 | 2099.15 | 2099.15 | 0     | 0 | 90 | 4.60E-08 | 1 | K.TITGFQTH TTPVLLAIGER.A        | 0.39 | R&H (2D-GIST) |
| gij21356859 | FBgn0028695 | 638.81  | 1275.61 | 1275.61 | 0     | 0 | 34 | 0.013    | 1 | R.IGDWGHYVR.H                   | 0.71 | R&H (2D-GIST) |
| gij17932854 | FBgn0028734 | 718.4   | 1434.8  | 1434.79 | 0.01  | 0 | 49 | 0.00044  | 1 | K.VLLEYHLSHLK.E                 | 0.69 | F&H (2D-GIST) |
| gij10717161 | FBgn0028734 | 718.4   | 1434.79 | 1434.79 | 0.01  | 0 | 48 | 0.00071  | 1 | K.VLLEYHLSHLK.E                 | 0.86 | F&H (2D-GIST) |
| gij17932854 | FBgn0028734 | 718.4   | 1434.79 | 1434.79 | 0.01  | 0 | 56 | 9.70E-05 | 1 | K.VLLEYHLSHLK.E                 | 0.90 | R&L (2D-GIST) |
| gij10717161 | FBgn0028734 | 741.71  | 2222.12 | 2222.12 | 0     | 1 | 42 | 0.0033   | 1 | R.VRDDL MGLAIGSHG SNIQAAR.T     | 0.69 | F&H (2D-GIST) |
| gij10717161 | FBgn0028734 | 741.72  | 2222.13 | 2222.12 | 0.01  | 1 | 52 | 0.00038  | 1 | R.VRDDL MGLAIGSHG SNIQAAR.T     | 1.19 | R&L (2D-GIST) |
| gij45550190 | FBgn0028938 | 825.97  | 1649.92 | 1649.91 | 0.01  | 0 | 54 | 0.00012  | 1 | K.IPVEKPVVHIEK.H                | 0.76 | F&H (2D-GIST) |
| gij45550190 | FBgn0028938 | 787.41  | 1572.8  | 1572.79 | 0.01  | 0 | 47 | 0.0017   | 1 | K.HVHVDPKYPVEK.V                | 1.33 | R&L (2D-GIST) |
| gij45550190 | FBgn0028938 | 839.41  | 1676.8  | 1676.79 | 0     | 1 | 41 | 0.0033   | 1 | K.HVTYKEPEFHK.H                 | 0.50 | F&H (2D-GIST) |
| gij45550190 | FBgn0028938 | 559.94  | 1676.79 | 1676.79 | 0     | 1 | 32 | 0.028    | 1 | K.HVTYKEPEFHK.H                 | 0.89 | F&H (2D-GIST) |
| gij45550190 | FBgn0028938 | 843.93  | 1685.85 | 1685.85 | 0     | 1 | 42 | 0.0042   | 1 | K.HVTYKEPEFHK.H                 | 0.84 | R&H (2D-GIST) |
| gij45550190 | FBgn0028938 | 559.94  | 1676.8  | 1676.79 | 0     | 1 | 38 | 0.0076   | 1 | K.HVTYKEPEFHK.H                 | 1.07 | R&L (2D-GIST) |
| gij6179938  | FBgn0028968 | 827.5   | 1652.98 | 1652.97 | 0.01  | 0 | 65 | 3.60E-06 | 1 | R.LAQLPGIQVLGPIHR.S             | 0.85 | F&H (2D-GIST) |
| gij6179938  | FBgn0028968 | 829.01  | 1656    | 1655.99 | 0.01  | 0 | 55 | 4.20E-05 | 1 | R.LAQLPGIQVLGPIHR.S             | 0.80 | R&H (2D-GIST) |
| gij24651660 | FBgn0028968 | 780.91  | 1559.81 | 1559.8  | 0.01  | 0 | 68 | 1.00E-05 | 1 | K.HTVLMNFLSGMLR.E               | 1.24 | R&L (2D-GIST) |
| gij6634090  | FBgn0029155 | 1158.56 | 2315.11 | 2315.08 | 0.03  | 0 | 77 | 8.90E-07 | 1 | R.YGQNTLIQFEDFGNHNAFR.F         | 0.90 | F&H (2D-GIST) |
| gij6634090  | FBgn0029155 | 772.71  | 2315.1  | 2315.08 | 0.02  | 0 | 49 | 0.00057  | 1 | R.YGQNTLIQFEDFGNHNAFR.F         | 0.80 | F&H (2D-GIST) |
| gij6634090  | FBgn0029155 | 1158.55 | 2315.08 | 2315.08 | 0     | 0 | 88 | 5.40E-08 | 1 | R.YGQNTLIQFEDFGNHNAFR.F         | 1.28 | F&H (2D-GIST) |

|             |             |         |         |         |       |   |     |          |   |                                |      |               |
|-------------|-------------|---------|---------|---------|-------|---|-----|----------|---|--------------------------------|------|---------------|
| gii6634090  | FBgn0029155 | 666.87  | 1331.73 | 1331.73 | 0     | 0 | 41  | 0.0046   | 1 | R.QTLGIHGLQPAR.F               | 0.50 | F&H (2D-GIST) |
| gii6634090  | FBgn0029155 | 1158.55 | 2315.08 | 2315.08 | 0     | 0 | 84  | 1.50E-07 | 1 | R.YGQNTLIQFEDFGNHNAFR.F        | 0.74 | R&H (2D-GIST) |
| gii6634090  | FBgn0029155 | 772.71  | 2315.1  | 2315.08 | 0.02  | 0 | 35  | 0.013    | 1 | R.YGQNTLIQFEDFGNHNAFR.F        | 0.81 | R&H (2D-GIST) |
| gii6634090  | FBgn0029155 | 510.93  | 1529.78 | 1529.77 | 0     | 0 | 30  | 0.087    | 1 | R.RPHGLFITTYNDR.G              | 0.78 | F&H (2D-GIST) |
| gii18857987 | FBgn0029779 | 792.4   | 1582.78 | 1582.78 | 0     | 0 | 69  | 6.70E-06 | 1 | K.NEPEAGASSIAHSIR.Q            | 1.00 | F&H (2D-GIST) |
| gii18857987 | FBgn0029779 | 657.88  | 1313.75 | 1313.74 | 0.01  | 0 | 36  | 0.012    | 1 | R.ITLPLCIFHR.F                 | 1.10 | F&H (2D-GIST) |
| gii18857987 | FBgn0029779 | 790.89  | 1579.77 | 1579.76 | 0.01  | 0 | 64  | 2.10E-05 | 1 | K.NEPEAGASSIAHSIR.Q            | 1.10 | R&L (2D-GIST) |
| gii18857987 | FBgn0029779 | 656.37  | 1310.72 | 1310.72 | 0.01  | 0 | 44  | 0.0021   | 1 | R.ITLPLCIFHR.F                 | 1.13 | R&L (2D-GIST) |
| gii24640147 | FBgn0029875 | 1131.06 | 2260.1  | 2260.11 | -0.01 | 0 | 58  | 7.00E-05 | 1 | R.TTTTSTRPDQPDGEVLTSTK.T       | 1.07 | R&H (2D-GIST) |
| gii24640147 | FBgn0029875 | 686.69  | 2057.04 | 2057.04 | 0     | 0 | 49  | 0.00091  | 1 | R.IIETQVEHPNAPSHSTPR.S         | 0.88 | F&H (2D-GIST) |
| gii24640147 | FBgn0029875 | 697.99  | 2090.96 | 2090.97 | -0.01 | 0 | 38  | 0.0044   | 1 | R.NVFEPVHETHVDSEPTGR.R         | 0.75 | F&H (2D-GIST) |
| gii24640147 | FBgn0029875 | 677.33  | 2028.97 | 2028.97 | 0     | 1 | 30  | 0.041    | 1 | R.RQPVEEDFSTHGFPVSR.T          | 0.76 | F&H (2D-GIST) |
| gii24640147 | FBgn0029875 | 709.68  | 2126.01 | 2126    | 0     | 1 | 34  | 0.015    | 1 | K.RYETEQLTPSQSHTTHK.Q          | 0.92 | F&H (2D-GIST) |
| gii24640147 | FBgn0029875 | 686.69  | 2057.04 | 2057.04 | 0     | 0 | 53  | 0.00034  | 1 | R.IIETQVEHPNAPSHSTPR.S         | 0.91 | R&H (2D-GIST) |
| gii24640499 | FBgn0029996 | 888.96  | 1775.91 | 1775.92 | -0.01 | 0 | 72  | 3.90E-06 | 1 | K.HEVTILGGLNEFHV.K             | 1.36 | F&H (2D-GIST) |
| gii24640499 | FBgn0029996 | 619.29  | 1854.86 | 1854.85 | 0     | 0 | 33  | 0.014    | 1 | R.DAAALYLHEPEEYHR.K            | 1.37 | R&L (2D-GIST) |
| gii28571140 | FBgn0030086 | 1317.21 | 2632.4  | 2632.38 | 0.02  | 0 | 60  | 4.40E-05 | 1 | R.ALLSLPTAIADNAGYDSAQLVSEL.R.A | 0.72 | F&H (2D-GIST) |
| gii28571140 | FBgn0030086 | 854.94  | 1707.86 | 1707.85 | 0.01  | 0 | 49  | 0.0008   | 1 | R.NAGHVEVTNDGATILR.A           | 0.62 | F&H (2D-GIST) |
| gii28571140 | FBgn0030086 | 832.4   | 1662.78 | 1662.78 | 0.01  | 0 | 61  | 2.20E-05 | 1 | R.VMSIEHADFDGIER.L             | 0.91 | R&H (2D-GIST) |
| gii28571140 | FBgn0030086 | 856.45  | 1710.88 | 1710.87 | 0     | 0 | 63  | 2.80E-05 | 1 | R.NAGHVEVTNDGATILR.A           | 1.06 | R&H (2D-GIST) |
| gii24640775 | FBgn0030106 | 1025.97 | 2049.92 | 2049.91 | 0     | 0 | 61  | 9.90E-06 | 1 | R.TISLYSDNPSETPHCR.L           | 0.71 | F&H (2D-GIST) |
| gii24640775 | FBgn0030106 | 998.47  | 1994.93 | 1994.92 | 0.01  | 0 | 103 | 1.60E-09 | 1 | K.EVPLGEHNYHVNQFDR.I           | 1.44 | F&H (2D-GIST) |
| gii24640775 | FBgn0030106 | 665.98  | 1994.92 | 1994.92 | 0     | 0 | 29  | 0.043    | 1 | K.EVPLGEHNYHVNQFDR.I           | 0.87 | R&L (2D-GIST) |
| gii24640775 | FBgn0030106 | 998.47  | 1994.92 | 1994.92 | 0     | 0 | 91  | 2.40E-08 | 1 | K.EVPLGEHNYHVNQFDR.I           | 0.93 | R&L (2D-GIST) |
| gii45554875 | FBgn0030317 | 628.84  | 1255.66 | 1255.66 | 0     | 0 | 66  | 1.90E-05 | 1 | R.FLDLSVEHV.R                  | 0.72 | F&H (2D-GIST) |
| gii45554875 | FBgn0030317 | 880.93  | 1759.85 | 1759.85 | 0     | 1 | 77  | 1.20E-06 | 1 | R.RDDHALGVYFENL.K.E            | 1.00 | F&H (2D-GIST) |
| gii45554875 | FBgn0030317 | 880.94  | 1759.86 | 1759.85 | 0.01  | 1 | 81  | 4.80E-07 | 1 | R.RDDHALGVYFENL.K.E            | 0.82 | R&L (2D-GIST) |
| gii45554875 | FBgn0030317 | 628.84  | 1255.66 | 1255.66 | 0     | 0 | 62  | 4.80E-05 | 1 | R.FLDLSVEHV.R                  | 1.06 | R&L (2D-GIST) |
| gii18859967 | FBgn0030608 | 682.37  | 1362.72 | 1362.71 | 0     | 0 | 36  | 0.014    | 1 | K.DLLPHLES.LER.I               | 1.01 | F&H (2D-GIST) |
| gii18859967 | FBgn0030608 | 673.88  | 1345.74 | 1345.74 | 0.01  | 0 | 52  | 0.00031  | 1 | K.VIDVVQPHLER.V                | 1.11 | F&H (2D-GIST) |
| gii18859967 | FBgn0030608 | 673.88  | 1345.74 | 1345.74 | 0     | 0 | 44  | 0.0018   | 1 | K.VIDVVQPHLER.V                | 1.17 | R&L (2D-GIST) |
| gii18921183 | FBgn0030653 | 1023.04 | 2044.06 | 2044.04 | 0.02  | 0 | 57  | 0.00013  | 1 | R.HTFLGGAAAQELALATGSER.L       | 1.47 | F&H (2D-GIST) |
| gii18921183 | FBgn0030653 | 635.68  | 1904.03 | 1904.03 | 0     | 0 | 28  | 0.099    | 1 | M.PRPVLLIHGGAGDISDSR.I         | 1.37 | R&H (2D-GIST) |
| gii18859877 | FBgn0030853 | 848.46  | 1694.9  | 1694.9  | 0     | 1 | 34  | 0.022    | 1 | R.VEAILSYPEGHKR.G              | 0.74 | F&H (2D-GIST) |
| gii18859877 | FBgn0030853 | 938.95  | 1875.88 | 1875.88 | 0.01  | 0 | 48  | 0.00065  | 1 | K.YHIQVCTTTPCWLR.G             | 0.90 | F&H (2D-GIST) |
| gii18859877 | FBgn0030853 | 618.01  | 1851    | 1851    | 0     | 2 | 40  | 0.0054   | 1 | K.RVEAILSYPEGHKR.G             | 0.83 | F&H (2D-GIST) |
| gii18859877 | FBgn0030853 | 618.01  | 1851    | 1851    | 0     | 2 | 33  | 0.025    | 1 | K.RVEAILSYPEGHKR.G             | 1.25 | R&L (2D-GIST) |
| gii19528569 | FBgn0030976 | 744.33  | 1486.65 | 1486.65 | 0     | 0 | 44  | 0.00055  | 1 | R.YGQVDTGHSYYR.D               | 0.41 | F&H (2D-GIST) |
| gii19528569 | FBgn0030976 | 843.94  | 1685.86 | 1685.84 | 0.01  | 0 | 74  | 2.70E-06 | 1 | R.LMGITHVLNAAEGCR.Y            | 0.82 | R&H (2D-GIST) |

|             |             |         |         |         |       |   |     |          |   |                                    |      |               |
|-------------|-------------|---------|---------|---------|-------|---|-----|----------|---|------------------------------------|------|---------------|
| gil18860539 | FBgn0031021 | 727.88  | 1453.75 | 1453.75 | 0     | 0 | 57  | 0.00012  | 1 | K.TALARPEELEQR.N                   | 0.66 | F&H (2D-GIST) |
| gil18860539 | FBgn0031021 | 757.76  | 2270.24 | 2270.23 | 0.02  | 0 | 51  | 0.00023  | 1 | K.ITVPTAVNLSPISGVPEEHIR.E          | 0.86 | R&L (2D-GIST) |
| gil38047659 | FBgn0031035 | 858.49  | 1714.96 | 1714.95 | 0.01  | 0 | 36  | 0.012    | 1 | K.HPELESIPNLHVIK.A                 | 1.03 | R&H (2D-GIST) |
| gil24643307 | FBgn0031035 | 1014.49 | 2026.96 | 2026.94 | 0.02  | 0 | 98  | 7.90E-09 | 1 | R.HYYWYLTNEGIEELR.S                | 1.17 | F&H (2D-GIST) |
| gil24643307 | FBgn0031035 | 1014.48 | 2026.95 | 2026.94 | 0.01  | 0 | 90  | 4.00E-08 | 1 | R.HYYWYLTNEGIEELR.S                | 0.85 | R&L (2D-GIST) |
| gil24643307 | FBgn0031035 | 887.5   | 2659.46 | 2659.45 | 0.01  | 2 | 36  | 0.0087   | 1 | K.KDFHAQKHPELESIPNLHVIK.A          | 1.35 | F&H (2D-GIST) |
| gil24643307 | FBgn0031035 | 826.77  | 2477.28 | 2477.27 | 0.01  | 1 | 29  | 0.062    | 1 | K.DFHAQKHPELESIPNLHVIK.A           | 1.01 | F&H (2D-GIST) |
| gil24643307 | FBgn0031035 | 829.79  | 2486.34 | 2486.33 | 0.02  | 1 | 45  | 0.0015   | 1 | K.DFHAQKHPELESIPNLHVIK.A           | 0.95 | R&H (2D-GIST) |
| gil24643307 | FBgn0031035 | 887.49  | 2659.46 | 2659.45 | 0.01  | 2 | 36  | 0.0083   | 1 | K.KDFHAQKHPELESIPNLHVIK.A          | 1.18 | R&H (2D-GIST) |
| gil19920382 | FBgn0031092 | 878.78  | 2633.32 | 2633.32 | 0.01  | 0 | 34  | 0.02     | 1 | K.VYQDSISSLEHCPKPVITAVHK.A         | 1.13 | R&L (2D-GIST) |
| gil19920382 | FBgn0031092 | 1317.68 | 2633.35 | 2633.32 | 0.04  | 0 | 40  | 0.0053   | 1 | K.VYQDSISSLEHCPKPVITAVHK.A         | 1.30 | R&L (2D-GIST) |
| gil19920382 | FBgn0031092 | 839.93  | 1677.85 | 1677.86 | -0.01 | 1 | 62  | 3.60E-05 | 1 | R.KFEAAEAHSSGLVSR.L                | 0.46 | R&H (2D-GIST) |
| gil19920382 | FBgn0031092 | 836.92  | 1671.83 | 1671.82 | 0.01  | 1 | 76  | 1.70E-06 | 1 | R.KFEAAEAHSSGLVSR.L                | 0.34 | R&L (2D-GIST) |
| gil23394956 | FBgn0031294 | 711.89  | 1421.76 | 1421.75 | 0.01  | 0 | 86  | 1.30E-07 | 1 | R.EIDIAATLEHLR.D                   | 0.84 | F&H (2D-GIST) |
| gil24580760 | FBgn0031294 | 930.13  | 2787.36 | 2787.36 | 0.01  | 0 | 77  | 8.40E-07 | 1 | R.VLATMLEELQGAGLGWDHPYVQCR.I       | 0.51 | R&H (2D-GIST) |
| gil23394956 | FBgn0031294 | 879.76  | 2636.26 | 2636.26 | 0     | 0 | 41  | 0.0025   | 1 | R.EAASQPQCAGLNRPGAPLPYDHSR.V       | 1.60 | F&H (2D-GIST) |
| gil24581168 | FBgn0031438 | 806.92  | 1611.83 | 1611.83 | 0     | 0 | 58  | 0.0001   | 1 | K.AETLLNESDHIAVR.R                 | 0.93 | F&H (2D-GIST) |
| gil24581168 | FBgn0031438 | 920.52  | 1839.02 | 1839.03 | 0     | 0 | 55  | 0.00012  | 1 | R.RPLVLQLIYSPLDDR.E                | 1.15 | F&H (2D-GIST) |
| gil24581168 | FBgn0031438 | 549.31  | 1096.61 | 1096.61 | 0     | 0 | 33  | 0.028    | 1 | R.ANHIISEIR.E                      | 0.63 | F&H (2D-GIST) |
| gil24581168 | FBgn0031438 | 700.33  | 1398.64 | 1398.64 | 0     | 0 | 63  | 1.20E-05 | 1 | R.MGYIFHETFGR.T                    | 0.72 | F&H (2D-GIST) |
| gil24581168 | FBgn0031438 | 701.84  | 1401.67 | 1401.66 | 0.01  | 0 | 48  | 0.00041  | 1 | R.MGYIFHETFGR.T                    | 0.95 | R&H (2D-GIST) |
| gil17944492 | FBgn0031544 | 688.4   | 1374.79 | 1374.78 | 0.01  | 0 | 38  | 0.005    | 1 | K.LNIPNIPLHFR.T                    | 1.01 | R&L (2D-GIST) |
| gil17944492 | FBgn0031544 | 858.14  | 2571.4  | 2571.4  | 0     | 1 | 30  | 0.026    | 1 | K.RQDLVSLVAGLMRPQLDQAHIK.I         | 0.83 | F&H (2D-GIST) |
| gil17944492 | FBgn0031544 | 858.14  | 2571.41 | 2571.4  | 0.02  | 1 | 38  | 0.0034   | 1 | K.RQDLVSLVAGLMRPQLDQAHIK.I         | 1.21 | R&L (2D-GIST) |
| gil19920794 | FBgn0031771 | 642.84  | 1283.66 | 1283.66 | 0     | 1 | 42  | 0.0028   | 1 | R.RGGVWFASFGR.T                    | 0.75 | R&H (2D-GIST) |
| gil19920794 | FBgn0031771 | 570.3   | 1138.58 | 1138.58 | 0     | 0 | 32  | 0.033    | 1 | R.HFRPEIEK.R                       | 0.97 | R&L (2D-GIST) |
| gil19921140 | FBgn0032350 | 1413.24 | 2824.47 | 2824.49 | -0.02 | 0 | 109 | 6.50E-10 | 1 | K.MTLEEIWPLADYITVHTPLIPATR.N       | 0.74 | R&H (2D-GIST) |
| gil19921140 | FBgn0032350 | 884.48  | 1766.94 | 1766.94 | 0     | 0 | 71  | 5.30E-06 | 1 | K.VVATPHLGASTSEAQVR.V              | 0.88 | R&H (2D-GIST) |
| gil19921140 | FBgn0032350 | 941.5   | 2821.49 | 2821.47 | 0.02  | 0 | 38  | 0.0069   | 1 | K.MTLEEIWPLADYITVHTPLIPATR.N       | 0.89 | R&L (2D-GIST) |
| gil7297967  | FBgn0032444 | 1014.56 | 3040.65 | 3040.62 | 0.04  | 0 | 41  | 0.0026   | 1 | R.AFADALEVIPSTLAENAGLNPIATVTEL.R.N | 1.00 | F&H (2D-GIST) |
| gil7297967  | FBgn0032444 | 1014.54 | 3040.61 | 3040.62 | 0     | 0 | 29  | 0.049    | 1 | R.AFADALEVIPSTLAENAGLNPIATVTEL.R.N | 0.69 | R&H (2D-GIST) |
| gil7297967  | FBgn0032444 | 735.87  | 1469.73 | 1469.73 | 0     | 0 | 40  | 0.0052   | 1 | K.GLHPTAISDSFQR.C                  | 1.00 | F&H (2D-GIST) |
| gil7297967  | FBgn0032444 | 606.32  | 1210.62 | 1210.61 | 0     | 0 | 37  | 0.011    | 1 | R.SLHDALCVVR.C                     | 1.01 | F&H (2D-GIST) |
| gil24583960 | FBgn0032453 | 1027.53 | 2053.04 | 2053.03 | 0.01  | 0 | 89  | 1.10E-07 | 1 | K.GEVLSAYVGSPPPTDGLHR.Y            | 0.63 | R&H (2D-GIST) |
| gil24583960 | FBgn0032453 | 685.35  | 2053.04 | 2053.03 | 0.01  | 0 | 39  | 0.011    | 1 | K.GEVLSAYVGSPPPTDGLHR.Y            | 1.48 | R&H (2D-GIST) |
| gil24583960 | FBgn0032453 | 1003.02 | 2004.02 | 2004.01 | 0.01  | 0 | 78  | 9.40E-07 | 1 | R.EWHHWLVGNIPGGDVAK.G              | 1.40 | R&H (2D-GIST) |
| gil28574473 | FBgn0032538 | 752.42  | 1502.83 | 1502.82 | 0     | 0 | 59  | 6.30E-05 | 1 | K.VPVHVERPVYPK.V                   | 0.69 | F&H (2D-GIST) |
| gil28574473 | FBgn0032538 | 675.06  | 2022.14 | 2022.14 | 0     | 1 | 34  | 0.0086   | 1 | R.VIHKVPVHVERPVYPK.V               | 0.82 | F&H (2D-GIST) |
| gil28574473 | FBgn0032538 | 675.06  | 2022.14 | 2022.14 | 0     | 1 | 40  | 0.0022   | 1 | R.VIHKVPVHVERPVYPK.V               | 0.74 | F&H (2D-GIST) |

|             |             |         |         |         |       |   |    |          |   |                                    |      |               |
|-------------|-------------|---------|---------|---------|-------|---|----|----------|---|------------------------------------|------|---------------|
| gii28574473 | FBgn0032538 | 675.06  | 2022.15 | 2022.14 | 0.01  | 1 | 36 | 0.0048   | 1 | R.VIHKVPVHVERPVYK.V                | 1.02 | R&L (2D-GIST) |
| gii24585223 | FBgn0032783 | 628.35  | 1254.69 | 1254.69 | 0     | 0 | 38 | 0.01     | 1 | K.HNILTVPFNR.D                     | 0.96 | F&H (2D-GIST) |
| gii24585223 | FBgn0032783 | 819.95  | 1637.88 | 1637.89 | -0.01 | 1 | 31 | 0.046    | 1 | K.RIVDWLQDSVPLR.I                  | 1.13 | F&H (2D-GIST) |
| gii24585223 | FBgn0032783 | 628.36  | 1254.7  | 1254.69 | 0.01  | 0 | 53 | 0.0003   | 1 | K.HNILTVPFNR.D                     | 0.93 | R&H (2D-GIST) |
| gii28574357 | FBgn0032797 | 649.65  | 1945.93 | 1945.93 | 0     | 0 | 30 | 0.036    | 1 | R.ASYACPHGYHVVLQSR.L               | 0.99 | F&H (2D-GIST) |
| gii28574357 | FBgn0032797 | 676.69  | 2027.06 | 2027.05 | 0.01  | 0 | 38 | 0.011    | 1 | K.WRPLDLPQCLLQGHPR.L               | 1.31 | F&H (2D-GIST) |
| gii28574357 | FBgn0032797 | 648.64  | 1942.91 | 1942.91 | 0     | 0 | 44 | 0.0015   | 1 | R.ASYACPHGYHVVLQSR.L               | 0.96 | R&L (2D-GIST) |
| gii28574357 | FBgn0032797 | 676.69  | 2027.06 | 2027.05 | 0     | 0 | 53 | 0.0003   | 1 | K.WRPLDLPQCLLQGHPR.L               | 1.03 | R&L (2D-GIST) |
| gii24585775 | FBgn0032976 | 792.36  | 2374.06 | 2374.04 | 0.01  | 0 | 52 | 8.20E-05 | 1 | K.AADGENACTSATGGGYRPGNFR.K         | 1.39 | R&H (2D-GIST) |
| gii24585775 | FBgn0032976 | 788.06  | 2361.15 | 2361.15 | 0.01  | 0 | 47 | 0.00092  | 1 | K.EVTSIAIVHFVNDQQSQHPR.S           | 1.14 | F&H (2D-GIST) |
| gii24585880 | FBgn0033035 | 1224.62 | 2447.22 | 2447.19 | 0.03  | 1 | 51 | 0.00055  | 1 | R.WRYPSLSVHGIEGAFYEPGAK.T          | 0.95 | R&L (2D-GIST) |
| gii24585880 | FBgn0033035 | 693.83  | 1385.65 | 1385.64 | 0.01  | 0 | 56 | 9.20E-05 | 1 | K.HVFNVEPDMTR.E                    | 1.44 | R&L (2D-GIST) |
| gii45552461 | FBgn0033109 | 848.46  | 1694.91 | 1694.9  | 0.01  | 0 | 92 | 3.70E-08 | 1 | R.TLTEPVVDLVFHQR.R                 | 0.82 | F&H (2D-GIST) |
| gii45552461 | FBgn0033109 | 849.97  | 1697.92 | 1697.92 | 0     | 0 | 60 | 5.90E-05 | 1 | R.TLTEPVVDLVFHQR.R                 | 0.85 | R&H (2D-GIST) |
| gii45552461 | FBgn0033109 | 654.35  | 1306.69 | 1306.69 | 0     | 0 | 45 | 0.002    | 1 | R.HGLIFTTGFNR.S                    | 0.79 | F&H (2D-GIST) |
| gii45552461 | FBgn0033109 | 848.46  | 1694.91 | 1694.9  | 0.01  | 0 | 79 | 7.50E-07 | 1 | R.TLTEPVVDLVFHQR.R                 | 0.93 | R&L (2D-GIST) |
| gii19921772 | FBgn0033235 | 1125.57 | 3373.68 | 3373.67 | 0.01  | 0 | 79 | 5.30E-07 | 1 | R.AVNFELETLMGRPEQEPILMDMIIHAAAFR.D | 0.86 | R&H (2D-GIST) |
| gii19921772 | FBgn0033235 | 702.7   | 2105.08 | 2105.08 | 0     | 0 | 41 | 0.0052   | 1 | R.MVIAGVGVDDHDELVSHVQR.Y           | 1.24 | R&H (2D-GIST) |
| gii21886539 | FBgn0033246 | 804.91  | 1607.8  | 1607.79 | 0     | 1 | 49 | 0.00065  | 1 | R.RVDTTEEFPLFR.Q                   | 0.45 | F&H (2D-GIST) |
| gii21886539 | FBgn0033246 | 725.41  | 1448.8  | 1448.8  | 0     | 0 | 54 | 0.00015  | 1 | K.STEPIHIVSVA VR.E                 | 0.49 | F&H (2D-GIST) |
| gii21886539 | FBgn0033246 | 726.92  | 1451.82 | 1451.82 | 0     | 0 | 56 | 0.00011  | 1 | K.STEPIHIVSVA VR.E                 | 0.40 | R&H (2D-GIST) |
| gii21886539 | FBgn0033246 | 806.41  | 1610.81 | 1610.81 | 0     | 1 | 56 | 0.00013  | 1 | R.RVDTTEEFPLFR.Q                   | 0.60 | R&H (2D-GIST) |
| gii19921806 | FBgn0033268 | 673.39  | 1344.76 | 1344.75 | 0.01  | 0 | 57 | 0.00013  | 1 | K.VENLVAQLGQGK.E                   | 0.74 | F&H (2D-GIST) |
| gii19921806 | FBgn0033268 | 877.46  | 1752.91 | 1752.89 | 0.02  | 1 | 84 | 2.30E-07 | 1 | K.VENLVAQLGQGKEDK.A                | 0.89 | F&H (2D-GIST) |
| gii19921806 | FBgn0033268 | 673.39  | 1344.76 | 1344.75 | 0.01  | 0 | 58 | 0.0001   | 1 | K.VENLVAQLGQGK.E                   | 1.24 | R&H (2D-GIST) |
| gii19921806 | FBgn0033268 | 877.46  | 1752.91 | 1752.89 | 0.02  | 1 | 87 | 1.10E-07 | 1 | K.VENLVAQLGQGKEDK.A                | 1.00 | R&L (2D-GIST) |
| gii19921864 | FBgn0033367 | 876.92  | 1751.84 | 1751.84 | 0     | 0 | 56 | 0.00011  | 1 | R.IYEAIHQGFVMDER.G                 | 1.11 | F&H (2D-GIST) |
| gii19921864 | FBgn0033367 | 783.89  | 1565.77 | 1565.77 | 0     | 1 | 46 | 0.0013   | 1 | K.MREESFVVQPGSR.M                  | 1.20 | F&H (2D-GIST) |
| gii19921864 | FBgn0033367 | 782.39  | 1562.76 | 1562.75 | 0.01  | 1 | 36 | 0.015    | 1 | K.MREESFVVQPGSR.M                  | 1.23 | R&L (2D-GIST) |
| gii19921864 | FBgn0033367 | 875.42  | 1748.83 | 1748.82 | 0.01  | 0 | 89 | 6.50E-08 | 1 | R.IYEAIHQGFVMDER.G                 | 1.24 | R&L (2D-GIST) |
| gii21645553 | FBgn0033434 | 840.78  | 2519.31 | 2519.31 | -0.01 | 0 | 52 | 0.00049  | 1 | R.MNAFLEHGIPANLVATHIVNASR.E        | 1.41 | F&H (2D-GIST) |
| gii21645553 | FBgn0033434 | 840.78  | 2519.32 | 2519.31 | 0.01  | 0 | 57 | 0.00013  | 1 | R.MNAFLEHGIPANLVATHIVNASR.E        | 1.03 | R&H (2D-GIST) |
| gii21645553 | FBgn0033434 | 506.62  | 1516.84 | 1516.84 | 0     | 0 | 46 | 0.0013   | 1 | K.ELLHIHSTVASLR.K                  | 1.43 | F&H (2D-GIST) |
| gii21645553 | FBgn0033434 | 507.63  | 1519.86 | 1519.85 | 0     | 0 | 35 | 0.017    | 1 | K.ELLHIHSTVASLR.K                  | 0.88 | R&H (2D-GIST) |
| gii21645553 | FBgn0033434 | 839.77  | 2516.3  | 2516.3  | 0.01  | 0 | 81 | 3.60E-07 | 1 | R.MNAFLEHGIPANLVATHIVNASR.E        | 0.71 | R&L (2D-GIST) |
| gii20129835 | FBgn0033460 | 653.91  | 1305.8  | 1305.8  | 0     | 0 | 32 | 0.011    | 1 | R.LPLGIVIHPPFR.D                   | 1.13 | R&H (2D-GIST) |
| gii20129835 | FBgn0033460 | 771.72  | 2312.13 | 2312.12 | 0.01  | 0 | 34 | 0.017    | 1 | K.VVLHNQFHESINCSPSIMR.C            | 0.85 | F&H (2D-GIST) |
| gii20129835 | FBgn0033460 | 770.71  | 2309.1  | 2309.1  | 0     | 0 | 48 | 0.00079  | 1 | K.VVLHNQFHESINCSPSIMR.C            | 1.14 | R&L (2D-GIST) |
| gii28573391 | FBgn0033728 | 695.91  | 1389.81 | 1389.8  | 0.01  | 0 | 64 | 1.60E-05 | 1 | K.ALDYLLSLPPAK.R                   | 0.98 | F&H (2D-GIST) |

|             |             |         |         |         |       |   |     |          |   |                            |      |               |
|-------------|-------------|---------|---------|---------|-------|---|-----|----------|---|----------------------------|------|---------------|
| gii28573391 | FBgn0033728 | 687.35  | 1372.68 | 1372.68 | 0     | 0 | 38  | 0.011    | 1 | K.ATSPDSSDVIIAR.G          | 0.63 | F&H (2D-GIST) |
| gii28573391 | FBgn0033728 | 692.89  | 1383.77 | 1383.76 | 0.01  | 0 | 55  | 0.0002   | 1 | K.ALDYLLSLPPAK.R           | 1.36 | R&L (2D-GIST) |
| gii24653162 | FBgn0033765 | 910.45  | 1818.88 | 1818.89 | -0.01 | 0 | 42  | 0.0027   | 1 | R.TALHLAASEGHLECVK.F       | 4.14 | F&H (2D-GIST) |
| gii24653162 | FBgn0033765 | 989.98  | 1977.94 | 1977.92 | 0.01  | 0 | 108 | 5.60E-10 | 1 | K.LNNYETGSSAETQHLNR.E      | 1.14 | R&H (2D-GIST) |
| gii24653362 | FBgn0033835 | 927.43  | 1852.85 | 1852.84 | 0.01  | 0 | 62  | 1.50E-05 | 1 | R.GEHVYTDEAGNTFVNR.K       | 0.86 | R&H (2D-GIST) |
| gii24653362 | FBgn0033835 | 893.96  | 1785.91 | 1785.9  | 0.01  | 0 | 42  | 0.004    | 1 | R.NGPHVFGSPGNQVYIR.G       | 1.18 | R&H (2D-GIST) |
| gii24653513 | FBgn0033886 | 1036.03 | 2070.05 | 2070.04 | 0.01  | 1 | 32  | 0.038    | 1 | K.TLIVHLPESDVEDDDRK.Q      | 1.18 | R&H (2D-GIST) |
| gii24653513 | FBgn0033886 | 822.93  | 1643.84 | 1643.84 | 0     | 0 | 45  | 0.0024   | 1 | R.INELLNPPSAHQ.R.G         | 1.41 | R&L (2D-GIST) |
| gii16768044 | FBgn0033924 | 849.02  | 1696.02 | 1696.02 | 0     | 1 | 62  | 7.80E-06 | 1 | K.KLLATTNDILHVIR.D         | 0.90 | F&H (2D-GIST) |
| gii16768044 | FBgn0033924 | 760.95  | 1519.88 | 1519.87 | 0.01  | 0 | 67  | 3.30E-06 | 1 | K.LLATTNDILHVIR.D          | 0.88 | F&H (2D-GIST) |
| gii16768044 | FBgn0033924 | 762.45  | 1522.89 | 1522.89 | 0     | 0 | 63  | 1.50E-05 | 1 | K.LLATTNDILHVIR.D          | 0.68 | R&H (2D-GIST) |
| gii16768044 | FBgn0033924 | 762.46  | 1522.9  | 1522.89 | 0.01  | 0 | 88  | 3.70E-08 | 1 | K.LLATTNDILHVIR.D          | 0.98 | R&H (2D-GIST) |
| gii20151711 | FBgn0033958 | 919.93  | 1837.85 | 1837.83 | 0.01  | 0 | 97  | 6.40E-09 | 1 | R.GHSDILEMFFGASTER.E       | 1.03 | R&L (2D-GIST) |
| gii20151711 | FBgn0033958 | 882.1   | 2643.28 | 2643.27 | 0.01  | 1 | 41  | 0.0037   | 1 | R.IDAGISPVHINFVSNYDDKYHR.D | 1.00 | F&H (2D-GIST) |
| gii20151711 | FBgn0033958 | 1322.64 | 2643.27 | 2643.27 | 0     | 1 | 47  | 0.00094  | 1 | R.IDAGISPVHINFVSNYDDKYHR.D | 1.36 | F&H (2D-GIST) |
| gii24653694 | FBgn0033958 | 823.45  | 1644.89 | 1644.89 | 0     | 0 | 49  | 0.00078  | 1 | R.ASAQGVLQGIHHGLGR.G       | 0.84 | F&H (2D-GIST) |
| gii20151711 | FBgn0033958 | 548.3   | 1641.87 | 1641.87 | 0     | 0 | 39  | 0.0094   | 1 | R.ASAQGVLQGIHHGLGR.G       | 0.70 | F&H (2D-GIST) |
| gii20151711 | FBgn0033958 | 823.46  | 1644.9  | 1644.89 | 0.01  | 0 | 56  | 0.00016  | 1 | R.ASAQGVLQGIHHGLGR.G       | 1.39 | R&H (2D-GIST) |
| gii20151711 | FBgn0033958 | 548.3   | 1641.87 | 1641.87 | 0     | 0 | 50  | 0.00076  | 1 | R.ASAQGVLQGIHHGLGR.G       | 1.07 | R&L (2D-GIST) |
| gii24654046 | FBgn0034079 | 713.88  | 1425.74 | 1425.74 | 0     | 0 | 77  | 1.50E-06 | 1 | R.VAADFLHTQLNR.N           | 0.71 | F&H (2D-GIST) |
| gii24654046 | FBgn0034079 | 989.48  | 1976.94 | 1976.93 | 0.01  | 0 | 54  | 0.00016  | 1 | R.NVVYYSNPTWENHHK.I        | 1.06 | R&H (2D-GIST) |
| gii19922596 | FBgn0034433 | 826.95  | 1651.89 | 1651.89 | 0.01  | 0 | 109 | 7.30E-10 | 1 | K.LLLDGISTSQASHLR.H        | 0.74 | F&H (2D-GIST) |
| gii19922596 | FBgn0034433 | 839.39  | 1676.76 | 1676.78 | -0.02 | 0 | 40  | 0.0024   | 1 | R.TEYDLHFQNLAE.R.A         | 0.89 | F&H (2D-GIST) |
| gii19922596 | FBgn0034433 | 828.45  | 1654.89 | 1654.91 | -0.02 | 0 | 108 | 8.80E-10 | 1 | K.LLLDGISTSQASHLR.H        | 0.85 | F&H (2D-GIST) |
| gii19922596 | FBgn0034433 | 839.4   | 1676.79 | 1676.78 | 0.01  | 0 | 59  | 4.00E-05 | 1 | R.TEYDLHFQNLAE.R.A         | 1.01 | R&L (2D-GIST) |
| gii19922596 | FBgn0034433 | 826.96  | 1651.9  | 1651.89 | 0.01  | 0 | 110 | 4.80E-10 | 1 | K.LLLDGISTSQASHLR.H        | 1.05 | R&L (2D-GIST) |
| gii19922596 | FBgn0034433 | 697.89  | 1393.77 | 1393.77 | 0     | 0 | 47  | 0.0013   | 1 | R.HLHAFIQTQVR.Y            | 0.76 | F&H (2D-GIST) |
| gii45551136 | FBgn0034618 | 844.45  | 1686.88 | 1686.91 | -0.02 | 0 | 35  | 0.031    | 1 | R.HGLIPNLLDSGSKPR.F        | 0.73 | F&H (2D-GIST) |
| gii45551136 | FBgn0034618 | 655.37  | 1308.73 | 1308.72 | 0.01  | 0 | 46  | 0.0016   | 1 | K.LSVHPDASLLGR.K           | 0.54 | R&H (2D-GIST) |
| gii45551136 | FBgn0034618 | 818.39  | 2452.16 | 2452.15 | 0.01  | 0 | 59  | 5.90E-05 | 1 | K.ETESHSPISEGQDAEHILYR.L   | 0.84 | F&H (2D-GIST) |
| gii45551136 | FBgn0034618 | 779.72  | 2336.13 | 2336.12 | 0.01  | 0 | 39  | 0.0072   | 1 | R.LDNCHSTPLHVAEYLLDAAR.K   | 0.79 | F&H (2D-GIST) |
| gii45551136 | FBgn0034618 | 818.39  | 2452.16 | 2452.15 | 0.01  | 0 | 40  | 0.004    | 1 | K.ETESHSPISEGQDAEHILYR.L   | 0.92 | R&L (2D-GIST) |
| gii24657155 | FBgn0034642 | 535.32  | 1068.62 | 1068.62 | 0     | 0 | 50  | 0.00037  | 1 | R.LPLLEFHR.S               | 1.71 | F&H (2D-GIST) |
| gii24657155 | FBgn0034642 | 755.4   | 1508.79 | 1508.79 | 0     | 0 | 58  | 0.00011  | 1 | K.VQVIGQWVDQHR.E           | 3.15 | F&H (2D-GIST) |
| gii21464474 | FBgn0034691 | 899.44  | 1796.88 | 1796.85 | 0.02  | 0 | 59  | 5.60E-05 | 1 | K.DSLADWLLDCHALAR.S        | 0.99 | F&H (2D-GIST) |
| gii21464474 | FBgn0034691 | 911.04  | 1820.07 | 1820.04 | 0.02  | 0 | 55  | 6.30E-05 | 1 | R.ILLPSNMLHAPTTVLR.E       | 1.07 | R&H (2D-GIST) |
| gii24762535 | FBgn0034968 | 829.44  | 1656.87 | 1656.87 | 0.01  | 0 | 95  | 2.40E-08 | 1 | K.HSGNIGFEDILAIAR.V        | 0.94 | F&H (2D-GIST) |
| gii24762535 | FBgn0034968 | 1071.51 | 2141    | 2140.99 | 0.01  | 0 | 70  | 3.50E-06 | 1 | K.HPHDVIDELNEGSIEVPAE.-    | 1.40 | F&H (2D-GIST) |
| gii24762535 | FBgn0034968 | 1073.03 | 2144.04 | 2144.01 | 0.03  | 0 | 43  | 0.0023   | 1 | K.HPHDVIDELNEGSIEVPAE.-    | 0.71 | R&H (2D-GIST) |



|             |             |         |         |         |       |   |     |          |   |                             |      |               |
|-------------|-------------|---------|---------|---------|-------|---|-----|----------|---|-----------------------------|------|---------------|
| gij24762535 | FBgn0034968 | 829.44  | 1656.87 | 1656.87 | 0.01  | 0 | 92  | 5.00E-08 | 1 | K.HSGNIGFEDILAIAR.V         | 1.00 | R&H (2D-GIST) |
| gij24762535 | FBgn0034968 | 829.44  | 1656.88 | 1656.87 | 0.01  | 0 | 68  | 1.20E-05 | 1 | K.HSGNIGFEDILAIAR.V         | 1.20 | F&H (2D-GIST) |
| gij24762535 | FBgn0034968 | 827.93  | 1653.85 | 1653.85 | 0.01  | 0 | 120 | 6.70E-11 | 1 | K.HSGNIGFEDILAIAR.V         | 1.05 | R&L (2D-GIST) |
| gij21687056 | FBgn0035037 | 704.8   | 1407.58 | 1407.57 | 0.01  | 0 | 28  | 0.0042   | 1 | R.AYHNWEEMMR.R              | 1.32 | R&L (2D-GIST) |
| gij21687056 | FBgn0035037 | 755.68  | 2264.01 | 2264.01 | 0     | 0 | 32  | 0.014    | 1 | K.VCEHHDVPEQVANWFAR.I       | 1.02 | F&H (2D-GIST) |
| gij21687056 | FBgn0035037 | 756.69  | 2267.04 | 2267.03 | 0.02  | 0 | 36  | 0.0052   | 1 | K.VCEHHDVPEQVANWFAR.I       | 0.97 | R&H (2D-GIST) |
| gij21483594 | FBgn0035060 | 926.01  | 1850.01 | 1850    | 0.01  | 0 | 90  | 3.90E-08 | 1 | K.LTNHLQATQLQISSVR.S        | 0.92 | F&H (2D-GIST) |
| gij21483594 | FBgn0035060 | 927.52  | 1853.03 | 1853.02 | 0.01  | 0 | 63  | 2.50E-05 | 1 | K.LTNHLQATQLQISSVR.S        | 1.09 | R&H (2D-GIST) |
| gij21483594 | FBgn0035060 | 519.77  | 1037.53 | 1037.53 | 0     | 1 | 41  | 0.0032   | 1 | K.RFEEIFR.Q                 | 0.86 | F&H (2D-GIST) |
| gij21483594 | FBgn0035060 | 519.77  | 1037.53 | 1037.53 | 0     | 1 | 43  | 0.0022   | 1 | K.RFEEIFR.Q                 | 1.08 | R&L (2D-GIST) |
| gij20130403 | FBgn0035121 | 1114.5  | 2226.98 | 2226.99 | -0.01 | 1 | 63  | 8.40E-06 | 1 | R.RPGAGGDETKDEPWAWESR.E     | 1.13 | F&H (2D-GIST) |
| gij20130403 | FBgn0035121 | 1113.55 | 2225.08 | 2225.09 | -0.01 | 0 | 56  | 0.00012  | 1 | R.EGRPTAEQQTLELEDQAR.A      | 1.22 | F&H (2D-GIST) |
| gij20130403 | FBgn0035121 | 1115.07 | 2228.12 | 2228.11 | 0.01  | 0 | 42  | 0.0038   | 1 | R.EGRPTAEQQTLELEDQAR.A      | 0.80 | R&H (2D-GIST) |
| gij20130403 | FBgn0035121 | 1117.51 | 2233.01 | 2233.03 | -0.02 | 1 | 29  | 0.025    | 1 | R.RPGAGGDETKDEPWAWESR.E     | 0.88 | R&H (2D-GIST) |
| gij20130403 | FBgn0035121 | 1109.04 | 2216.07 | 2216.07 | 0.01  | 0 | 64  | 2.20E-05 | 1 | K.WSHENPAHLVDIYGGNPVK.A     | 1.00 | F&H (2D-GIST) |
| gij20130403 | FBgn0035121 | 1109.05 | 2216.08 | 2216.07 | 0.02  | 0 | 73  | 2.80E-06 | 1 | K.WSHENPAHLVDIYGGNPVK.A     | 1.03 | R&L (2D-GIST) |
| gij19923002 | FBgn0035147 | 849.95  | 1697.88 | 1697.89 | -0.01 | 0 | 56  | 0.00016  | 1 | R.DYIHIVDLAEGHVK.A          | 0.65 | R&H (2D-GIST) |
| gij19923002 | FBgn0035147 | 680.34  | 1358.67 | 1358.67 | 0     | 0 | 42  | 0.0047   | 1 | R.YFNPVGAHISGR.I            | 0.51 | F&H (2D-GIST) |
| gij19923002 | FBgn0035147 | 681.86  | 1361.7  | 1361.69 | 0.01  | 0 | 40  | 0.0062   | 1 | R.YFNPVGAHISGR.I            | 0.67 | R&H (2D-GIST) |
| gij19923002 | FBgn0035147 | 730.69  | 2189.06 | 2189.05 | 0.01  | 0 | 47  | 0.0011   | 1 | R.RPSLSVYGSDFPTHDTGTVR.D    | 0.43 | F&H (2D-GIST) |
| gij19923002 | FBgn0035147 | 730.69  | 2189.06 | 2189.05 | 0.01  | 0 | 41  | 0.0046   | 1 | R.RPSLSVYGSDFPTHDTGTVR.D    | 0.74 | R&L (2D-GIST) |
| gij24655252 | FBgn0035226 | 771.36  | 1540.71 | 1540.71 | 0.01  | 0 | 44  | 0.00094  | 1 | R.MLHDYIGEDTFR.K            | 0.64 | F&H (2D-GIST) |
| gij24655252 | FBgn0035226 | 653.37  | 1304.73 | 1304.73 | 0.01  | 1 | 40  | 0.0053   | 1 | R.DREQLAIFLR.D              | 1.20 | F&H (2D-GIST) |
| gij12083059 | FBgn0035226 | 769.85  | 1537.69 | 1537.69 | 0     | 0 | 45  | 0.00077  | 1 | R.MLHDYIGEDTFR.K            | 0.85 | R&L (2D-GIST) |
| gij24656494 | FBgn0035404 | 817.92  | 1633.83 | 1633.82 | 0.01  | 0 | 40  | 0.0056   | 1 | R.VVCEPLELAQEFR.K           | 0.74 | R&H (2D-GIST) |
| gij24656494 | FBgn0035404 | 787.89  | 1573.76 | 1573.75 | 0     | 0 | 66  | 1.30E-05 | 1 | R.ILTDYGFEGHPQR.R           | 0.63 | F&H (2D-GIST) |
| gij24656494 | FBgn0035404 | 578.63  | 1732.87 | 1732.87 | -0.01 | 1 | 39  | 0.0059   | 1 | R.RILTDYGFEGHPQR.R          | 0.99 | F&H (2D-GIST) |
| gij24656494 | FBgn0035404 | 812.06  | 2433.15 | 2433.15 | 0.01  | 0 | 77  | 8.80E-07 | 1 | K.DHHQAQFTNLVDIAGVDVPCR.K   | 0.84 | F&H (2D-GIST) |
| gij24656494 | FBgn0035404 | 813.07  | 2436.18 | 2436.17 | 0.01  | 0 | 40  | 0.0041   | 1 | K.DHHQAQFTNLVDIAGVDVPCR.K   | 0.67 | R&H (2D-GIST) |
| gij24656494 | FBgn0035404 | 870.77  | 2609.3  | 2609.29 | 0.01  | 1 | 34  | 0.02     | 1 | K.DHHQAQFTNLVDIAGVDVPCR.K   | 1.01 | R&H (2D-GIST) |
| gij21355923 | FBgn0035510 | 841.01  | 1680.01 | 1680    | 0.01  | 0 | 53  | 3.20E-05 | 1 | K.VLAPAPLLHASPLVAK.V        | 0.75 | R&L (2D-GIST) |
| gij21355923 | FBgn0035510 | 966.51  | 1931    | 1931    | 0     | 0 | 61  | 5.50E-05 | 1 | R.IVEYTADPVHGFNAVVR.R       | 0.67 | R&H (2D-GIST) |
| gij24658292 | FBgn0035600 | 701.86  | 1401.71 | 1401.71 | 0.01  | 0 | 72  | 3.00E-06 | 1 | K.GLFDALDHQSVR.R            | 0.74 | F&H (2D-GIST) |
| gij24658292 | FBgn0035600 | 1334.71 | 2667.41 | 2667.38 | 0.02  | 1 | 68  | 7.40E-06 | 1 | R.KGGEDYIFSLLTGYHDAPAGVVLRE | 0.73 | R&H (2D-GIST) |
| gij24658292 | FBgn0035600 | 890.14  | 2667.4  | 2667.38 | 0.02  | 1 | 70  | 4.80E-06 | 1 | R.KGGEDYIFSLLTGYHDAPAGVVLRE | 0.84 | R&H (2D-GIST) |
| gij24658292 | FBgn0035600 | 700.35  | 1398.69 | 1398.69 | 0     | 0 | 78  | 8.50E-07 | 1 | K.GLFDALDHQSVR.R            | 0.70 | F&H (2D-GIST) |
| gij24658292 | FBgn0035600 | 701.86  | 1401.71 | 1401.71 | 0     | 0 | 85  | 1.80E-07 | 1 | K.GLFDALDHQSVR.R            | 0.88 | R&H (2D-GIST) |
| gij21357009 | FBgn0035753 | 757.92  | 1513.83 | 1513.81 | 0.02  | 0 | 65  | 2.00E-05 | 1 | K.LTVCALHVTQTAR.E           | 1.04 | F&H (2D-GIST) |
| gij21357009 | FBgn0035753 | 618.37  | 1234.72 | 1234.71 | 0     | 0 | 29  | 0.023    | 1 | K.INRPPLSLQR.I              | 0.78 | F&H (2D-GIST) |

|             |             |         |         |         |       |   |     |          |   |                             |      |               |
|-------------|-------------|---------|---------|---------|-------|---|-----|----------|---|-----------------------------|------|---------------|
| gij21355775 | FBgn0035905 | 732.43  | 1462.85 | 1462.84 | 0.01  | 0 | 33  | 0.017    | 1 | R.SLGRPNYNLLVK.D            | 1.00 | R&H (2D-GIST) |
| gij21355775 | FBgn0035905 | 468.76  | 935.51  | 935.51  | 0     | 0 | 55  | 0.00013  | 1 | R.AVLGAFFK.A                | 1.09 | R&L (2D-GIST) |
| gij45550577 | FBgn0035917 | 619.87  | 1237.72 | 1237.72 | 0.01  | 0 | 36  | 0.0066   | 1 | K.LHEFAVVLLR.D              | 0.84 | R&L (2D-GIST) |
| gij45550577 | FBgn0035917 | 799.37  | 1596.73 | 1596.73 | 0.01  | 0 | 33  | 0.012    | 1 | R.AHPGHDYHDSIMK.Q           | 0.70 | F&H (2D-GIST) |
| gij28317263 | FBgn0035943 | 957.97  | 1913.93 | 1913.95 | -0.01 | 0 | 67  | 1.10E-05 | 1 | K.HESSIIGADNLFVSVR.E        | 1.18 | F&H (2D-GIST) |
| gij24661247 | FBgn0035943 | 707.35  | 1412.69 | 1412.69 | 0     | 0 | 61  | 3.40E-05 | 1 | R.MLMAWVNGPHGR.H            | 1.23 | F&H (2D-GIST) |
| gij24661247 | FBgn0035943 | 626.31  | 1250.61 | 1250.61 | 0     | 0 | 42  | 0.0033   | 1 | K.EVVPHELACR.I              | 1.12 | F&H (2D-GIST) |
| gij24661247 | FBgn0035943 | 705.85  | 1409.68 | 1409.67 | 0.01  | 0 | 59  | 4.90E-05 | 1 | R.MLMAWVNGPHGR.H            | 1.61 | R&L (2D-GIST) |
| gij24661247 | FBgn0035943 | 563.94  | 1688.81 | 1688.81 | 0     | 0 | 52  | 0.00024  | 1 | R.NHFSTVHGAVEAGYR.E         | 0.99 | F&H (2D-GIST) |
| gij24661247 | FBgn0035943 | 1284.62 | 2567.22 | 2567.24 | -0.01 | 0 | 78  | 6.70E-07 | 1 | K.SMPSGPHPVVGSFGTHLTQTFWR.K | 0.69 | F&H (2D-GIST) |
| gij24661247 | FBgn0035943 | 843.9   | 1685.79 | 1685.79 | 0     | 0 | 78  | 6.50E-07 | 1 | R.NHFSTVHGAVEAGYR.E         | 1.12 | F&H (2D-GIST) |
| gij24661247 | FBgn0035943 | 857.76  | 2570.26 | 2570.26 | 0     | 0 | 62  | 3.60E-05 | 1 | K.SMPSGPHPVVGSFGTHLTQTFWR.K | 0.72 | R&H (2D-GIST) |
| gij24661247 | FBgn0035943 | 562.94  | 1685.79 | 1685.79 | 0     | 0 | 43  | 0.002    | 1 | R.NHFSTVHGAVEAGYR.E         | 1.36 | R&L (2D-GIST) |
| gij24661247 | FBgn0035943 | 843.91  | 1685.8  | 1685.79 | 0.01  | 0 | 80  | 4.10E-07 | 1 | R.NHFSTVHGAVEAGYR.E         | 1.63 | R&L (2D-GIST) |
| gij24661405 | FBgn0035966 | 899.95  | 1797.88 | 1797.88 | 0     | 0 | 98  | 8.30E-09 | 1 | R.NDYVLSLAANAHQNR.Y         | 0.81 | F&H (2D-GIST) |
| gij24661405 | FBgn0035966 | 792.36  | 1582.71 | 1582.7  | 0     | 0 | 41  | 0.0016   | 1 | K.NQHECDLLEDIR.Q            | 0.82 | F&H (2D-GIST) |
| gij24661405 | FBgn0035966 | 793.87  | 1585.73 | 1585.72 | 0.01  | 0 | 28  | 0.034    | 1 | K.NQHECDLLEDIR.Q            | 1.13 | R&H (2D-GIST) |
| gij24661405 | FBgn0035966 | 899.95  | 1797.88 | 1797.88 | 0.01  | 0 | 102 | 3.70E-09 | 1 | R.NDYVLSLAANAHQNR.Y         | 1.19 | R&L (2D-GIST) |
| gij24661405 | FBgn0035966 | 855.36  | 1708.71 | 1708.7  | 0.01  | 0 | 38  | 0.00059  | 1 | K.SYFDEEHCAHDVR.D           | 1.06 | F&H (2D-GIST) |
| gij17862180 | FBgn0035978 | 753.94  | 1505.86 | 1505.86 | 0.01  | 0 | 38  | 0.0042   | 1 | M.PSGIRPIDVLLER.A           | 0.50 | F&H (2D-GIST) |
| gij17862180 | FBgn0035978 | 755.45  | 1508.89 | 1508.88 | 0.02  | 0 | 34  | 0.0096   | 1 | M.PSGIRPIDVLLER.A           | 0.39 | R&H (2D-GIST) |
| gij17862180 | FBgn0035978 | 839.92  | 1677.82 | 1677.81 | 0     | 0 | 40  | 0.0042   | 1 | R.VQIHTFNQSCFPR.I           | 0.55 | F&H (2D-GIST) |
| gij17862180 | FBgn0035978 | 755.45  | 1508.88 | 1508.88 | 0.01  | 0 | 47  | 0.00051  | 1 | M.PSGIRPIDVLLER.A           | 0.52 | R&H (2D-GIST) |
| gij21355239 | FBgn0036030 | 924.02  | 1846.03 | 1846.02 | 0.01  | 0 | 79  | 5.90E-07 | 1 | K.VYAILTHGIFSGPAISR.I       | 1.10 | F&H (2D-GIST) |
| gij21355239 | FBgn0036030 | 728.87  | 1455.72 | 1455.71 | 0.01  | 0 | 101 | 4.10E-09 | 1 | K.VFSGTSHPDLAQR.I           | 0.98 | F&H (2D-GIST) |
| gij21355239 | FBgn0036030 | 1151.57 | 2301.12 | 2301.12 | 0     | 0 | 117 | 7.90E-11 | 1 | K.IAILVDDMADTCGTIVHAADR.L   | 0.81 | R&H (2D-GIST) |
| gij21355239 | FBgn0036030 | 924.02  | 1846.03 | 1846.02 | 0.01  | 0 | 63  | 2.30E-05 | 1 | K.VYAILTHGIFSGPAISR.I       | 1.35 | R&H (2D-GIST) |
| gij21355239 | FBgn0036030 | 767.04  | 2298.11 | 2298.1  | 0.01  | 0 | 68  | 6.80E-06 | 1 | K.IAILVDDMADTCGTIVHAADR.L   | 0.83 | R&L (2D-GIST) |
| gij21355239 | FBgn0036030 | 728.86  | 1455.71 | 1455.71 | 0     | 0 | 92  | 3.30E-08 | 1 | K.VFSGTSHPDLAQR.I           | 0.95 | F&H (2D-GIST) |
| gij21355239 | FBgn0036030 | 616.35  | 1846.03 | 1846.02 | 0.01  | 0 | 29  | 0.064    | 1 | K.VYAILTHGIFSGPAISR.I       | 1.30 | R&H (2D-GIST) |
| gij21355239 | FBgn0036030 | 922.51  | 1843.01 | 1843    | 0.01  | 0 | 84  | 1.40E-07 | 1 | K.VYAILTHGIFSGPAISR.I       | 1.06 | R&L (2D-GIST) |
| gij21357213 | FBgn0036619 | 942.51  | 1883    | 1882.98 | 0.01  | 1 | 51  | 0.00042  | 1 | K.GKAPLPVTDTEEVQQR.L        | 0.66 | R&H (2D-GIST) |
| gij21357213 | FBgn0036619 | 496.79  | 991.56  | 991.56  | 0     | 0 | 56  | 0.00012  | 1 | R.LNHLNALR.E                | 0.79 | F&H (2D-GIST) |
| gij21357213 | FBgn0036619 | 688.86  | 1375.71 | 1375.71 | 0     | 1 | 36  | 0.015    | 1 | K.ALATSLREEADR.R            | 0.28 | R&H (2D-GIST) |
| gij21357213 | FBgn0036619 | 496.79  | 991.56  | 991.56  | 0     | 0 | 40  | 0.0041   | 1 | R.LNHLNALR.E                | 1.20 | F&H (2D-GIST) |
| gij21357213 | FBgn0036619 | 496.79  | 991.56  | 991.56  | 0     | 0 | 50  | 0.00044  | 1 | R.LNHLNALR.E                | 1.13 | R&L (2D-GIST) |
| gij24665395 | FBgn0036642 | 770.92  | 1539.83 | 1539.83 | 0     | 0 | 51  | 0.00045  | 1 | R.AVVAVAGQGAAASNHK.E        | 0.76 | F&H (2D-GIST) |
| gij24665395 | FBgn0036642 | 822.9   | 1643.78 | 1643.79 | -0.01 | 0 | 62  | 3.10E-05 | 1 | R.NESYDIQGASHLLR.L          | 1.36 | F&H (2D-GIST) |
| gij24665395 | FBgn0036642 | 822.9   | 1643.79 | 1643.79 | 0     | 0 | 86  | 1.30E-07 | 1 | R.NESYDIQGASHLLR.L          | 0.76 | F&H (2D-GIST) |

|             |             |         |         |         |       |   |    |          |   |                                |      |               |
|-------------|-------------|---------|---------|---------|-------|---|----|----------|---|--------------------------------|------|---------------|
| gij24665395 | FBgn0036642 | 824.42  | 1646.82 | 1646.81 | 0.01  | 0 | 79 | 5.70E-07 | 1 | R.NESYDIQGASHLLR.L             | 0.92 | R&H (2D-GIST) |
| gij28574881 | FBgn0036663 | 972.97  | 1943.93 | 1943.94 | -0.01 | 0 | 53 | 0.00016  | 1 | K.WNDLVFHGEWQEALR.Q            | 1.05 | F&H (2D-GIST) |
| gij28574881 | FBgn0036663 | 604.32  | 1206.62 | 1206.62 | 0     | 0 | 31 | 0.058    | 1 | R.AGHFVTVFER.N                 | 1.08 | F&H (2D-GIST) |
| gij28574881 | FBgn0036663 | 689.88  | 1377.74 | 1377.74 | 0     | 0 | 29 | 0.071    | 1 | R.VLAHNGEINTLR.G               | 0.81 | F&H (2D-GIST) |
| gij28574881 | FBgn0036663 | 604.32  | 1206.63 | 1206.62 | 0     | 0 | 34 | 0.028    | 1 | R.AGHFVTVFER.N                 | 1.01 | R&H (2D-GIST) |
| gij28574881 | FBgn0036663 | 971.46  | 1940.91 | 1940.92 | 0     | 0 | 56 | 9.30E-05 | 1 | K.WNDLVFHGEWQEALR.Q            | 0.70 | R&L (2D-GIST) |
| gij28574881 | FBgn0036663 | 803.14  | 2406.39 | 2406.39 | 0     | 0 | 64 | 4.80E-06 | 1 | K.VAVSALLALGALHHHLIETLQR.M     | 0.78 | R&H (2D-GIST) |
| gij15291275 | FBgn0036680 | 772.93  | 1543.85 | 1543.85 | 0     | 0 | 48 | 0.00089  | 1 | R.AHVQNIDIPLGGR.I              | 0.77 | F&H (2D-GIST) |
| gij15291275 | FBgn0036680 | 774.44  | 1546.87 | 1546.87 | 0.01  | 0 | 53 | 0.00026  | 1 | R.AHVQNIDIPLGGR.I              | 0.91 | R&H (2D-GIST) |
| gij15291275 | FBgn0036680 | 813.91  | 1625.8  | 1625.8  | 0     | 0 | 44 | 0.0021   | 1 | R.IGPGTHNNPSVADFR.L            | 0.78 | F&H (2D-GIST) |
| gij15291275 | FBgn0036680 | 812.4   | 1622.79 | 1622.78 | 0.01  | 0 | 43 | 0.0042   | 1 | R.IGPGTHNNPSVADFR.L            | 1.12 | R&L (2D-GIST) |
| gij15292459 | FBgn0036821 | 981.49  | 1960.96 | 1960.95 | 0.01  | 0 | 67 | 1.10E-05 | 1 | R.AGDVMVSFLPLAHMFER.C          | 0.70 | R&L (2D-GIST) |
| gij15292459 | FBgn0036821 | 965.8   | 2894.36 | 2894.35 | 0.02  | 0 | 59 | 4.00E-05 | 1 | K.TAEAIDSEGWHHTGDVGMWLPNGTLR.I | 0.92 | R&H (2D-GIST) |
| gij24666674 | FBgn0036857 | 929.81  | 2786.42 | 2786.4  | 0.02  | 0 | 32 | 0.028    | 1 | K.IGHQLEAQTLVGVPVHTQONVENYK.A  | 0.92 | F&H (2D-GIST) |
| gij24666674 | FBgn0036857 | 817.75  | 2450.23 | 2450.22 | 0.01  | 0 | 51 | 0.00043  | 1 | R.DGFYVEPTVITGLPHDASVVHRE      | 1.14 | F&H (2D-GIST) |
| gij24666674 | FBgn0036857 | 817.75  | 2450.23 | 2450.22 | 0.01  | 0 | 43 | 0.0028   | 1 | R.DGFYVEPTVITGLPHDASVVHRE      | 0.78 | R&L (2D-GIST) |
| gij24666925 | FBgn0036901 | 892.91  | 1783.81 | 1783.8  | 0.01  | 0 | 79 | 2.90E-07 | 1 | R.SHPVWEMVMNELDR.R             | 0.85 | F&H (2D-GIST) |
| gij24666925 | FBgn0036901 | 780.92  | 1559.83 | 1559.82 | 0     | 0 | 47 | 0.0014   | 1 | R.APLGLHFHASWLK.S              | 1.06 | F&H (2D-GIST) |
| gij24666925 | FBgn0036901 | 894.42  | 1786.83 | 1786.82 | 0.01  | 0 | 70 | 2.60E-06 | 1 | R.SHPVWEMVMNELDR.R             | 0.96 | R&H (2D-GIST) |
| gij24666925 | FBgn0036901 | 780.92  | 1559.83 | 1559.82 | 0.01  | 0 | 47 | 0.0013   | 1 | R.APLGLHFHASWLK.S              | 0.72 | R&L (2D-GIST) |
| gij21428612 | FBgn0036901 | 595.61  | 1783.81 | 1783.8  | 0.01  | 0 | 48 | 0.00039  | 1 | R.SHPVWEMVMNELDR.R             | 0.79 | R&L (2D-GIST) |
| gij21064733 | FBgn0036927 | 1170.57 | 2339.12 | 2339.1  | 0.01  | 0 | 66 | 1.00E-05 | 1 | K.LQLGGYFHNDDFIPNEPYR.I        | 1.44 | F&H (2D-GIST) |
| gij21064733 | FBgn0036927 | 629.84  | 1257.66 | 1257.65 | 0     | 0 | 49 | 0.00093  | 1 | K.EFPFILNSTR.G                 | 1.39 | F&H (2D-GIST) |
| gij21064733 | FBgn0036927 | 636.32  | 1270.63 | 1270.63 | 0     | 0 | 41 | 0.0042   | 1 | K.EYHANIVLDR.F                 | 0.78 | F&H (2D-GIST) |
| gij21064733 | FBgn0036927 | 636.32  | 1270.64 | 1270.63 | 0     | 0 | 36 | 0.016    | 1 | K.EYHANIVLDR.F                 | 0.81 | R&L (2D-GIST) |
| gij24667554 | FBgn0037001 | 975.01  | 1948.01 | 1948    | 0.01  | 0 | 71 | 5.40E-06 | 1 | K.LNSFICPGTPIGGLHPAR.I         | 1.13 | F&H (2D-GIST) |
| gij24667554 | FBgn0037001 | 625.36  | 1248.7  | 1248.69 | 0     | 0 | 44 | 0.0015   | 1 | K.HSNVVINLVGR.D                | 0.70 | F&H (2D-GIST) |
| gij24667554 | FBgn0037001 | 817.91  | 1633.8  | 1633.79 | 0.01  | 0 | 69 | 6.80E-06 | 1 | R.YQLSELVDWFHR.L               | 0.77 | F&H (2D-GIST) |
| gij24667554 | FBgn0037001 | 819.42  | 1636.82 | 1636.81 | 0.01  | 0 | 86 | 1.40E-07 | 1 | R.YQLSELVDWFHR.L               | 0.82 | R&H (2D-GIST) |
| gij24667554 | FBgn0037001 | 975.01  | 1948.01 | 1948    | 0.01  | 0 | 68 | 9.40E-06 | 1 | K.LNSFICPGTPIGGLHPAR.I         | 0.66 | R&L (2D-GIST) |
| gij24667554 | FBgn0037001 | 650.34  | 1948.01 | 1948    | 0.01  | 0 | 29 | 0.085    | 1 | K.LNSFICPGTPIGGLHPAR.I         | 1.02 | R&L (2D-GIST) |
| gij24667554 | FBgn0037001 | 597.64  | 1789.89 | 1789.89 | 0     | 1 | 48 | 0.0011   | 1 | K.RYQLSELVDWFHR.L              | 1.00 | F&H (2D-GIST) |
| gij28416365 | FBgn0037001 | 598.65  | 1792.92 | 1792.91 | 0.01  | 1 | 57 | 0.00015  | 1 | K.RYQLSELVDWFHR.L              | 0.84 | R&H (2D-GIST) |
| gij24667974 | FBgn0037066 | 806.42  | 1610.83 | 1610.83 | 0.01  | 0 | 41 | 0.0059   | 1 | R.SLEESPSADLLRPR.K             | 0.61 | F&H (2D-GIST) |
| gij24667974 | FBgn0037066 | 911.45  | 1820.88 | 1820.87 | 0.01  | 0 | 30 | 0.051    | 1 | K.HFEVHQSPSASTVSPK.Q           | 1.17 | F&H (2D-GIST) |
| gij24667974 | FBgn0037066 | 914.47  | 1826.92 | 1826.91 | 0.01  | 0 | 62 | 3.90E-05 | 1 | K.HFEVHQSPSASTVSPK.Q           | 1.16 | R&H (2D-GIST) |
| gij21357643 | FBgn0037146 | 927     | 1851.99 | 1851.97 | 0.02  | 0 | 81 | 4.40E-07 | 1 | K.EALATVGAEHAVSLVSTR.E         | 1.05 | F&H (2D-GIST) |
| gij21357643 | FBgn0037146 | 926.97  | 1851.92 | 1851.91 | 0.01  | 0 | 75 | 1.70E-06 | 1 | R.LASIVEQVAECHLEGR.E           | 0.79 | F&H (2D-GIST) |
| gij21357643 | FBgn0037146 | 618.32  | 1851.92 | 1851.91 | 0.01  | 0 | 51 | 0.00047  | 1 | R.LASIVEQVAECHLEGR.E           | 0.89 | F&H (2D-GIST) |

|             |             |         |         |         |       |   |    |          |   |                               |      |               |
|-------------|-------------|---------|---------|---------|-------|---|----|----------|---|-------------------------------|------|---------------|
| gij21357643 | FBgn0037146 | 928.5   | 1854.99 | 1854.99 | 0.01  | 0 | 93 | 3.20E-08 | 1 | K.EALATVGAEHAVSLVSTR.E        | 0.98 | R&H (2D-GIST) |
| gij21357643 | FBgn0037146 | 928.48  | 1854.95 | 1854.93 | 0.01  | 0 | 74 | 2.10E-06 | 1 | R.LASIVEQVAECHLEGR.E          | 1.00 | R&H (2D-GIST) |
| gij21357643 | FBgn0037146 | 619.32  | 1854.94 | 1854.93 | 0.01  | 0 | 68 | 9.50E-06 | 1 | R.LASIVEQVAECHLEGR.E          | 1.45 | R&H (2D-GIST) |
| gij21357643 | FBgn0037146 | 967.83  | 2900.48 | 2900.48 | 0     | 0 | 44 | 0.0023   | 1 | R.SIQQSLHIPVLGHAEGVCHVYIDR.D  | 0.99 | F&H (2D-GIST) |
| gij28573261 | FBgn0037230 | 685.88  | 1369.74 | 1369.74 | 0     | 0 | 83 | 4.60E-07 | 1 | R.LDAAYSILLGR.R               | 0.74 | F&H (2D-GIST) |
| gij28573261 | FBgn0037230 | 740.41  | 1478.81 | 1478.81 | 0     | 0 | 71 | 3.90E-06 | 1 | R.AHVTALEVLSLER.S             | 0.89 | F&H (2D-GIST) |
| gij21355167 | FBgn0037245 | 568.36  | 1134.71 | 1134.7  | 0.01  | 0 | 51 | 3.70E-05 | 1 | K.ILPVLQQLK.E                 | 0.98 | F&H (2D-GIST) |
| gij21355167 | FBgn0037245 | 571.38  | 1140.74 | 1140.74 | 0.01  | 0 | 54 | 2.80E-05 | 1 | K.ILPVLQQLK.E                 | 1.07 | R&H (2D-GIST) |
| gij21355167 | FBgn0037245 | 546.76  | 1091.5  | 1091.5  | 0     | 0 | 43 | 0.0014   | 1 | K.CFLHFGNR.K                  | 0.51 | F&H (2D-GIST) |
| gij21355167 | FBgn0037245 | 546.76  | 1091.5  | 1091.5  | 0     | 0 | 40 | 0.0031   | 1 | K.CFLHFGNR.K                  | 0.92 | R&L (2D-GIST) |
| gij17946379 | FBgn0037249 | 843.45  | 2527.34 | 2527.33 | 0.02  | 0 | 71 | 3.40E-06 | 1 | R.MAAHVLLATLSIPLSAHPEFDR.F    | 1.04 | F&H (2D-GIST) |
| gij17946379 | FBgn0037249 | 844.46  | 2530.35 | 2530.34 | 0.01  | 0 | 51 | 0.00039  | 1 | R.MAAHVLLATLSIPLSAHPEFDR.F    | 0.72 | R&H (2D-GIST) |
| gij17946379 | FBgn0037249 | 580.95  | 1739.82 | 1739.8  | 0.01  | 0 | 61 | 2.90E-05 | 1 | R.VNTHCEALYHDIAR.M            | 1.10 | R&L (2D-GIST) |
| gij38047751 | FBgn0037351 | 900.97  | 1799.92 | 1799.91 | 0.01  | 0 | 90 | 6.20E-08 | 1 | R.LSHEVGWHYQDVIK.S            | 0.79 | F&H (2D-GIST) |
| gij21357053 | FBgn0037351 | 541.83  | 1081.64 | 1081.64 | 0     | 1 | 47 | 0.00053  | 1 | R.RVVVPIAMR.V                 | 0.87 | F&H (2D-GIST) |
| gij21357053 | FBgn0037351 | 897.95  | 1793.88 | 1793.87 | 0.01  | 0 | 91 | 5.10E-08 | 1 | R.LSHEVGWHYQDVIK.S            | 1.19 | R&L (2D-GIST) |
| gij21357053 | FBgn0037351 | 401.7   | 801.39  | 801.39  | 0     | 0 | 36 | 0.017    | 1 | R.GPFHFR.A                    | 1.01 | F&H (2D-GIST) |
| gij21483482 | FBgn0037370 | 921.94  | 1841.86 | 1841.86 | 0     | 0 | 59 | 3.50E-05 | 1 | K.SCQVSTWHETNPVPR.S           | 1.01 | F&H (2D-GIST) |
| gij21483482 | FBgn0037370 | 603.79  | 1205.56 | 1205.56 | 0     | 0 | 37 | 0.0042   | 1 | R.HVDFDEMLR.E                 | 1.21 | F&H (2D-GIST) |
| gij24644950 | FBgn0037537 | 945.03  | 1888.04 | 1888.03 | 0     | 0 | 59 | 8.10E-05 | 1 | K.VPPVSNRPHEVEPTIK.K          | 0.97 | F&H (2D-GIST) |
| gij24644950 | FBgn0037537 | 770.36  | 1538.7  | 1538.7  | 0.01  | 0 | 47 | 0.00052  | 1 | R.ICDFAFFHGVER.H              | 1.40 | R&L (2D-GIST) |
| gij15291561 | FBgn0037580 | 1020.48 | 2038.94 | 2038.95 | -0.01 | 0 | 49 | 0.00036  | 1 | K.TYEPTHEGYIQSWVER.Y          | 0.78 | F&H (2D-GIST) |
| gij24645049 | FBgn0037580 | 981.51  | 1961.01 | 1961    | 0.01  | 0 | 87 | 1.30E-07 | 1 | K.AFEVQVGLHELLGHGSGK.L        | 0.78 | F&H (2D-GIST) |
| gij24645049 | FBgn0037580 | 654.68  | 1961.01 | 1961    | 0.01  | 0 | 44 | 0.0024   | 1 | K.AFEVQVGLHELLGHGSGK.L        | 0.79 | F&H (2D-GIST) |
| gij45551847 | FBgn0037607 | 774.89  | 1547.76 | 1547.76 | 0     | 1 | 79 | 7.20E-07 | 1 | R.KIDSLEGHPTPR.L              | 0.73 | F&H (2D-GIST) |
| gij45551847 | FBgn0037607 | 689.83  | 1377.65 | 1377.65 | 0     | 0 | 57 | 9.40E-05 | 1 | K.IDSDLEGHPTPR.L              | 1.00 | F&H (2D-GIST) |
| gij45551847 | FBgn0037607 | 1207.58 | 2413.15 | 2413.14 | 0.01  | 0 | 47 | 0.00081  | 1 | R.TSRPNTCVIYDNEEPFTIGR.G      | 0.64 | R&H (2D-GIST) |
| gij45551847 | FBgn0037607 | 1321.2  | 2640.38 | 2640.36 | 0.02  | 0 | 82 | 3.00E-07 | 1 | R.VVVVEDHYQQGGLGEAVLSALAGER.N | 0.84 | R&H (2D-GIST) |
| gij45551847 | FBgn0037607 | 777.91  | 1553.8  | 1553.8  | 0     | 1 | 36 | 0.014    | 1 | R.KIDSLEGHPTPR.L              | 1.00 | R&H (2D-GIST) |
| gij16768650 | FBgn0037607 | 880.13  | 2637.38 | 2637.34 | 0.04  | 0 | 65 | 1.40E-05 | 1 | R.VVVVEDHYQQGGLGEAVLSALAGER.N | 0.86 | R&L (2D-GIST) |
| gij16768650 | FBgn0037607 | 562.32  | 1122.62 | 1122.62 | 0     | 0 | 36 | 0.01     | 1 | K.HLYVPTVPR.S                 | 0.73 | F&H (2D-GIST) |
| gij16768650 | FBgn0037607 | 562.32  | 1122.62 | 1122.62 | 0     | 0 | 30 | 0.034    | 1 | K.HLYVPTVPR.S                 | 0.99 | R&L (2D-GIST) |
| gij24645179 | FBgn0037632 | 803.42  | 1604.83 | 1604.83 | 0     | 0 | 67 | 1.20E-05 | 1 | K.QVKPFVEEGVHPR.V             | 0.75 | F&H (2D-GIST) |
| gij24645179 | FBgn0037632 | 598.83  | 1195.64 | 1195.64 | 0     | 0 | 50 | 0.00052  | 1 | R.SLHDAIMIVR.R                | 0.84 | F&H (2D-GIST) |
| gij24645179 | FBgn0037632 | 803.43  | 1604.84 | 1604.83 | 0     | 0 | 72 | 4.40E-06 | 1 | K.QVKPFVEEGVHPR.V             | 0.84 | R&L (2D-GIST) |
| gij24645179 | FBgn0037632 | 598.83  | 1195.64 | 1195.64 | 0     | 0 | 53 | 0.00026  | 1 | R.SLHDAIMIVR.R                | 0.99 | R&L (2D-GIST) |
| gij24646169 | FBgn0037977 | 1095.08 | 2188.14 | 2188.14 | 0.01  | 0 | 99 | 8.60E-09 | 1 | R.LVVVEYQQTAPASQELHFR.D       | 0.95 | F&H (2D-GIST) |
| gij24646169 | FBgn0037977 | 643.82  | 1285.63 | 1285.62 | 0     | 0 | 52 | 0.0003   | 1 | R.FIAGSFHYFR.A                | 1.16 | R&L (2D-GIST) |
| gij21357171 | FBgn0038049 | 782.95  | 1563.89 | 1563.88 | 0.01  | 0 | 34 | 0.0092   | 1 | K.NITLIGINRPQQR.N             | 0.87 | F&H (2D-GIST) |

|             |             |         |         |         |       |   |    |          |   |                              |      |               |
|-------------|-------------|---------|---------|---------|-------|---|----|----------|---|------------------------------|------|---------------|
| gij21357171 | FBgn0038049 | 782.96  | 1563.9  | 1563.88 | 0.01  | 0 | 30 | 0.022    | 1 | K.NITLIGINRPQQR.N            | 1.28 | R&L (2D-GIST) |
| gij21357171 | FBgn0038049 | 862.81  | 2585.4  | 2585.39 | 0.01  | 0 | 55 | 9.30E-05 | 1 | R.ALDLILTGRPVGQSQAHDIGLVNR.I | 1.43 | F&H (2D-GIST) |
| gij21357171 | FBgn0038049 | 862.81  | 2585.41 | 2585.39 | 0.01  | 0 | 66 | 7.20E-06 | 1 | R.ALDLILTGRPVGQSQAHDIGLVNR.I | 0.70 | R&L (2D-GIST) |
| gij21357171 | FBgn0038049 | 863.82  | 2588.43 | 2588.41 | 0.02  | 0 | 63 | 1.50E-05 | 1 | R.ALDLILTGRPVGQSQAHDIGLVNR.I | 1.09 | R&H (2D-GIST) |
| gij24646562 | FBgn0038145 | 853.95  | 1705.88 | 1705.87 | 0.01  | 0 | 36 | 0.018    | 1 | K.MPLQLVEALCGFQR.I           | 0.73 | F&H (2D-GIST) |
| gij24646562 | FBgn0038145 | 1117.55 | 2233.08 | 2233.09 | -0.01 | 0 | 85 | 1.40E-07 | 1 | K.DVVHQMSVQLEELYNGATR.K      | 0.73 | R&H (2D-GIST) |
| gij24646562 | FBgn0038145 | 1026.53 | 2051.04 | 2051.05 | -0.01 | 0 | 75 | 1.70E-06 | 1 | R.VQIAPGIMQHIEQVCR.K         | 0.83 | R&H (2D-GIST) |
| gij24646562 | FBgn0038145 | 744.37  | 2230.08 | 2230.07 | 0.01  | 0 | 41 | 0.0047   | 1 | K.DVVHQMSVQLEELYNGATR.K      | 0.78 | R&L (2D-GIST) |
| gij24646943 | FBgn0038271 | 740.35  | 1478.69 | 1478.67 | 0.01  | 0 | 52 | 0.00023  | 1 | R.LCTMVTEAEVER.A             | 0.41 | F&H (2D-GIST) |
| gij24646943 | FBgn0038271 | 741.86  | 1481.7  | 1481.69 | 0     | 0 | 49 | 0.00035  | 1 | R.LCTMVTEAEVER.A             | 0.87 | R&H (2D-GIST) |
| gij24646943 | FBgn0038271 | 779.4   | 1556.78 | 1556.76 | 0.01  | 0 | 57 | 9.50E-05 | 1 | K.ADLTDYIQTHYK.A             | 0.96 | R&H (2D-GIST) |
| gij24646943 | FBgn0038271 | 749.42  | 1496.82 | 1496.81 | 0.01  | 0 | 53 | 0.00033  | 1 | K.AVEILADIIQNSK.L            | 0.82 | R&L (2D-GIST) |
| gij24646943 | FBgn0038271 | 566.94  | 1697.8  | 1697.8  | 0.01  | 0 | 36 | 0.0092   | 1 | K.NNGVAHFLEHMAFK.G           | 0.63 | F&H (2D-GIST) |
| gij24646943 | FBgn0038271 | 588.82  | 1175.63 | 1175.63 | 0     | 0 | 37 | 0.012    | 1 | R.IPLHELEQR.I                | 0.70 | F&H (2D-GIST) |
| gij24646943 | FBgn0038271 | 849.91  | 1697.81 | 1697.8  | 0.01  | 0 | 89 | 5.60E-08 | 1 | K.NNGVAHFLEHMAFK.G           | 0.73 | F&H (2D-GIST) |
| gij24646943 | FBgn0038271 | 590.33  | 1178.65 | 1178.65 | 0     | 0 | 35 | 0.018    | 1 | R.IPLHELEQR.I                | 0.83 | R&H (2D-GIST) |
| gij24646943 | FBgn0038271 | 852.93  | 1703.85 | 1703.84 | 0.01  | 0 | 72 | 3.10E-06 | 1 | K.NNGVAHFLEHMAFK.G           | 0.94 | R&H (2D-GIST) |
| gij24646943 | FBgn0038271 | 566.94  | 1697.81 | 1697.8  | 0.01  | 0 | 36 | 0.0091   | 1 | K.NNGVAHFLEHMAFK.G           | 0.83 | R&L (2D-GIST) |
| gij24646943 | FBgn0038271 | 444.92  | 1331.73 | 1331.73 | 0     | 1 | 37 | 0.01     | 1 | R.RIPLHELEQR.I               | 0.75 | F&H (2D-GIST) |
| gij24646943 | FBgn0038271 | 444.92  | 1331.73 | 1331.73 | 0     | 1 | 38 | 0.0093   | 1 | R.RIPLHELEQR.I               | 1.05 | R&L (2D-GIST) |
| gij24646982 | FBgn0038293 | 898.46  | 1794.91 | 1794.91 | 0     | 0 | 65 | 2.70E-05 | 1 | K.FSAIHEFQNLHAVAK.E          | 0.94 | F&H (2D-GIST) |
| gij24646982 | FBgn0038293 | 983.51  | 1965    | 1965.01 | -0.01 | 1 | 64 | 2.40E-05 | 1 | K.KFSAIHEFQNLHAVAK.E         | 0.94 | F&H (2D-GIST) |
| gij24646982 | FBgn0038293 | 978.49  | 2932.43 | 2932.42 | 0.02  | 0 | 40 | 0.0039   | 1 | K.MVHFPEFLTSTNPLFGIDYEEFVR.G | 0.57 | R&H (2D-GIST) |
| gij24646982 | FBgn0038293 | 901.48  | 1800.95 | 1800.94 | 0.01  | 0 | 75 | 1.90E-06 | 1 | K.FSAIHEFQNLHAVAK.E          | 0.79 | R&H (2D-GIST) |
| gij46019969 | FBgn0038294 | 877     | 1751.99 | 1751.99 | 0.01  | 0 | 32 | 0.027    | 1 | R.DLLSPSNLPISSIVR.D          | 0.77 | R&H (2D-GIST) |
| gij46019969 | FBgn0038294 | 775.9   | 1549.78 | 1549.77 | 0.01  | 0 | 31 | 0.048    | 1 | R.ASSLEPLDELFER.K            | 0.92 | R&H (2D-GIST) |
| gij46019969 | FBgn0038294 | 897.43  | 1792.85 | 1792.85 | 0     | 0 | 29 | 0.036    | 1 | R.ASRPYSSYLDSPSYR.S          | 0.78 | F&H (2D-GIST) |
| gij46019969 | FBgn0038294 | 817.42  | 2449.23 | 2449.22 | 0.01  | 0 | 61 | 4.30E-05 | 1 | R.WGPRPTEVAYDAEGLPIFHPR.N    | 1.02 | F&H (2D-GIST) |
| gij46019969 | FBgn0038294 | 817.41  | 2449.22 | 2449.22 | 0     | 0 | 50 | 0.00051  | 1 | R.WGPRPTEVAYDAEGLPIFHPR.N    | 0.67 | R&L (2D-GIST) |
| gij24647369 | FBgn0038405 | 1215.15 | 2428.28 | 2428.27 | 0.01  | 0 | 54 | 0.00019  | 1 | R.FGLERPTPTAAAPPPQPPQR.V     | 0.65 | R&H (2D-GIST) |
| gij24647369 | FBgn0038405 | 815.96  | 1629.91 | 1629.9  | 0.01  | 0 | 62 | 3.60E-05 | 1 | R.LSIPGAVASPGQVPHR.Q         | 1.04 | R&H (2D-GIST) |
| gij24647369 | FBgn0038405 | 543.3   | 1626.89 | 1626.88 | 0     | 0 | 44 | 0.0022   | 1 | R.LSIPGAVASPGQVPHR.Q         | 1.61 | R&L (2D-GIST) |
| gij45553397 | FBgn0038535 | 605.84  | 1209.66 | 1209.65 | 0     | 0 | 40 | 0.0059   | 1 | R.VHAAELQELR.Q               | 2.41 | F&H (2D-GIST) |
| gij45553397 | FBgn0038535 | 804.4   | 1606.78 | 1606.77 | 0.01  | 0 | 48 | 0.00086  | 1 | K.EQHLQQLQEQR.E              | 1.08 | F&H (2D-GIST) |
| gij24647881 | FBgn0038587 | 788.9   | 1575.79 | 1575.78 | 0.01  | 0 | 94 | 2.40E-08 | 1 | K.TAGFIGADQLGDSLK.G          | 0.57 | F&H (2D-GIST) |
| gij24647881 | FBgn0038587 | 680.43  | 1358.85 | 1358.84 | 0.01  | 1 | 50 | 0.00015  | 1 | K.KLLEAAIPELK.K              | 0.91 | R&H (2D-GIST) |
| gij24647881 | FBgn0038587 | 593.87  | 1185.72 | 1185.71 | 0     | 0 | 35 | 0.011    | 1 | K.LLEAAIPELK.K               | 1.02 | R&H (2D-GIST) |
| gij24647881 | FBgn0038587 | 788.9   | 1575.78 | 1575.78 | 0.01  | 0 | 75 | 2.00E-06 | 1 | K.TAGFIGADQLGDSLK.G          | 1.05 | R&L (2D-GIST) |
| gij24648347 | FBgn0038771 | 752.4   | 1502.78 | 1502.78 | 0     | 0 | 76 | 2.00E-06 | 1 | R.HNLIVVNPDTSPR.G            | 0.83 | F&H (2D-GIST) |

|             |             |         |         |         |       |   |     |          |   |                            |      |               |
|-------------|-------------|---------|---------|---------|-------|---|-----|----------|---|----------------------------|------|---------------|
| gij24648347 | FBgn0038771 | 753.91  | 1505.8  | 1505.8  | 0     | 0 | 62  | 4.20E-05 | 1 | R.HNLIVVNPDTSPR.G          | 0.93 | R&H (2D-GIST) |
| gij24648347 | FBgn0038771 | 958.5   | 1914.98 | 1914.97 | 0.01  | 0 | 48  | 0.00095  | 1 | R.GIFGHSMGGHGALICALK.N     | 1.08 | R&H (2D-GIST) |
| gij21355997 | FBgn0038839 | 541.29  | 1080.57 | 1080.57 | 0     | 0 | 36  | 0.013    | 1 | K.ALHLPEGFR.E              | 0.88 | F&H (2D-GIST) |
| gij21355997 | FBgn0038839 | 541.29  | 1080.57 | 1080.57 | 0     | 0 | 33  | 0.018    | 1 | K.ALHLPEGFR.E              | 0.99 | R&L (2D-GIST) |
| gij21355997 | FBgn0038839 | 740.67  | 2218.99 | 2218.97 | 0.02  | 0 | 42  | 0.0009   | 1 | K.HCYIEQAFDNLHDHGYSR.M     | 1.12 | F&H (2D-GIST) |
| gij21355997 | FBgn0038839 | 1108.97 | 2215.93 | 2215.95 | -0.02 | 0 | 89  | 7.20E-09 | 1 | K.HCYIEQAFDNLHDHGYSR.M     | 0.73 | R&L (2D-GIST) |
| gij21355997 | FBgn0038839 | 739.66  | 2215.95 | 2215.95 | 0     | 0 | 43  | 0.00056  | 1 | K.HCYIEQAFDNLHDHGYSR.M     | 1.08 | R&L (2D-GIST) |
| gij24648872 | FBgn0038922 | 612.34  | 1222.67 | 1222.67 | 0     | 0 | 50  | 0.0004   | 1 | R.HTNIDTVIIR.E             | 0.76 | F&H (2D-GIST) |
| gij24648872 | FBgn0038922 | 786.92  | 1571.82 | 1571.81 | 0.01  | 0 | 44  | 0.0023   | 1 | R.NDLDLYANVVHVR.S          | 1.05 | R&H (2D-GIST) |
| gij24648872 | FBgn0038922 | 613.67  | 1837.98 | 1837.98 | 0     | 1 | 56  | 0.00013  | 1 | K.LRNDLDLYANVVHVR.S        | 0.69 | F&H (2D-GIST) |
| gij24648944 | FBgn0038946 | 656.35  | 1310.68 | 1310.68 | 0     | 0 | 48  | 0.00075  | 1 | K.HAITALCQTVR.Q            | 0.73 | F&H (2D-GIST) |
| gij24648944 | FBgn0038946 | 570.84  | 1139.67 | 1139.67 | 0     | 1 | 60  | 5.10E-05 | 1 | R.RVELIEALR.D              | 0.87 | F&H (2D-GIST) |
| gij24648944 | FBgn0038946 | 570.84  | 1139.67 | 1139.67 | 0     | 1 | 60  | 4.90E-05 | 1 | R.RVELIEALR.D              | 0.87 | R&L (2D-GIST) |
| gij24648944 | FBgn0038946 | 732.4   | 1462.79 | 1462.79 | 0     | 0 | 46  | 0.0018   | 1 | R.GHIVVMNSVLGHR.I          | 0.90 | R&H (2D-GIST) |
| gij24648944 | FBgn0038946 | 487.6   | 1459.77 | 1459.77 | 0     | 0 | 57  | 0.00017  | 1 | R.GHIVVMNSVLGHR.I          | 0.99 | R&L (2D-GIST) |
| gij24649832 | FBgn0039241 | 679.31  | 2034.9  | 2034.9  | 0.01  | 0 | 49  | 0.0002   | 1 | K.AFTHTATYDDAISDYFR.K      | 0.91 | F&H (2D-GIST) |
| gij24649832 | FBgn0039241 | 1018.46 | 2034.91 | 2034.9  | 0.01  | 0 | 106 | 4.10E-10 | 1 | K.AFTHTATYDDAISDYFR.K      | 1.07 | F&H (2D-GIST) |
| gij24649832 | FBgn0039241 | 1019.97 | 2037.93 | 2037.91 | 0.01  | 0 | 103 | 7.90E-10 | 1 | K.AFTHTATYDDAISDYFR.K      | 0.83 | R&H (2D-GIST) |
| gij24649832 | FBgn0039241 | 707.4   | 1412.79 | 1412.79 | 0     | 0 | 44  | 0.0023   | 1 | K.TLHPAVHAGILSR.T          | 0.70 | F&H (2D-GIST) |
| gij24649832 | FBgn0039241 | 471.94  | 1412.79 | 1412.79 | 0     | 0 | 52  | 0.00038  | 1 | K.TLHPAVHAGILSR.T          | 0.84 | F&H (2D-GIST) |
| gij24649832 | FBgn0039241 | 707.4   | 1412.79 | 1412.79 | 0.01  | 0 | 43  | 0.0034   | 1 | K.TLHPAVHAGILSR.T          | 0.89 | R&L (2D-GIST) |
| gij24649832 | FBgn0039241 | 471.94  | 1412.79 | 1412.79 | 0.01  | 0 | 42  | 0.0039   | 1 | K.TLHPAVHAGILSR.T          | 1.09 | R&L (2D-GIST) |
| gij24649911 | FBgn0039269 | 545.61  | 1633.8  | 1633.8  | 0     | 0 | 32  | 0.036    | 1 | K.ATVAAFAASEGHAPR.V        | 1.31 | F&H (2D-GIST) |
| gij24649911 | FBgn0039269 | 545.61  | 1633.8  | 1633.8  | 0     | 0 | 28  | 0.096    | 1 | K.ATVAAFAASEGHAPR.V        | 0.70 | R&L (2D-GIST) |
| gij24649911 | FBgn0039269 | 773.04  | 2316.08 | 2316.07 | 0.02  | 0 | 47  | 0.00072  | 1 | R.EVYEHVYETVDIQGSHDVR.A    | 0.88 | R&L (2D-GIST) |
| gij24650122 | FBgn0039358 | 1164.61 | 2327.21 | 2327.19 | 0.02  | 0 | 92  | 3.20E-08 | 1 | K.EHANVIQEAVYQITVNDAIR.T   | 0.69 | R&H (2D-GIST) |
| gij24650122 | FBgn0039358 | 1050.55 | 2099.08 | 2099.07 | 0.01  | 0 | 75  | 1.90E-06 | 1 | R.HAVTMLPGGGIGPELMGYVR.E   | 0.86 | R&H (2D-GIST) |
| gij24650122 | FBgn0039358 | 1218.64 | 2435.27 | 2435.26 | 0.02  | 0 | 85  | 1.70E-07 | 1 | K.NIANPVAMISASIDMLNHLGHK.E | 0.97 | R&H (2D-GIST) |
| gij24650122 | FBgn0039358 | 775.74  | 2324.19 | 2324.18 | 0.02  | 0 | 32  | 0.038    | 1 | K.EHANVIQEAVYQITVNDAIR.T   | 0.70 | R&L (2D-GIST) |
| gij24650122 | FBgn0039358 | 699.69  | 2096.06 | 2096.05 | 0.01  | 0 | 61  | 4.80E-05 | 1 | R.HAVTMLPGGGIGPELMGYVR.E   | 0.93 | R&L (2D-GIST) |
| gij24650122 | FBgn0039358 | 841.38  | 1680.75 | 1680.75 | 0     | 0 | 68  | 3.00E-06 | 1 | R.NYGDHYAIFEPGTR.N         | 0.71 | F&H (2D-GIST) |
| gij24650122 | FBgn0039358 | 830.41  | 1658.8  | 1658.8  | 0     | 1 | 46  | 0.0012   | 1 | K.RVNWPHGNYFSQL-           | 0.79 | F&H (2D-GIST) |
| gij24650122 | FBgn0039358 | 842.9   | 1683.78 | 1683.77 | 0.01  | 0 | 53  | 0.00011  | 1 | R.NYGDHYAIFEPGTR.N         | 0.93 | R&H (2D-GIST) |
| gij24650122 | FBgn0039358 | 830.41  | 1658.81 | 1658.8  | 0.01  | 1 | 57  | 0.00011  | 1 | K.RVNWPHGNYFSQL-           | 0.96 | R&L (2D-GIST) |
| gij24650122 | FBgn0039358 | 420.24  | 1257.68 | 1257.68 | 0     | 0 | 49  | 0.0011   | 1 | R.HHDIDVVLIR.Q             | 0.55 | F&H (2D-GIST) |
| gij24650122 | FBgn0039358 | 420.24  | 1257.68 | 1257.68 | 0     | 0 | 44  | 0.0038   | 1 | R.HHDIDVVLIR.Q             | 1.20 | R&L (2D-GIST) |
| gij24650124 | FBgn0039359 | 695.85  | 1389.69 | 1389.69 | 0     | 0 | 42  | 0.0031   | 1 | K.SLNYNHLMPTR.Y            | 0.97 | F&H (2D-GIST) |
| gij24650124 | FBgn0039359 | 695.85  | 1389.69 | 1389.69 | 0     | 0 | 44  | 0.002    | 1 | K.SLNYNHLMPTR.Y            | 1.14 | R&H (2D-GIST) |
| gij24650124 | FBgn0039359 | 773.05  | 2316.12 | 2316.11 | 0.01  | 0 | 50  | 0.00044  | 1 | K.THDDGTPEKPFGHALVAGIDR.Y  | 0.78 | F&H (2D-GIST) |

|             |             |         |         |         |       |   |    |          |   |                                      |      |               |
|-------------|-------------|---------|---------|---------|-------|---|----|----------|---|--------------------------------------|------|---------------|
| gij24650124 | FBgn0039359 | 775.06  | 2322.16 | 2322.15 | 0.01  | 0 | 45 | 0.0014   | 1 | K.THDDGTPEKPFPGHALVAGIDR.Y           | 1.08 | R&H (2D-GIST) |
| gij24650124 | FBgn0039359 | 775.06  | 2322.16 | 2322.15 | 0.01  | 0 | 43 | 0.0023   | 1 | K.THDDGTPEKPFPGHALVAGIDR.Y           | 1.04 | R&H (2D-GIST) |
| gij24650124 | FBgn0039359 | 911.79  | 2732.34 | 2732.33 | 0.01  | 1 | 39 | 0.0072   | 1 | K.THDDGTPEKPFPGHALVAGIDRYPR.K        | 0.66 | R&L (2D-GIST) |
| gij17738257 | FBgn0039555 | 762.42  | 1522.82 | 1522.82 | 0     | 0 | 37 | 0.014    | 1 | K.LHATPAESALAE.LR.S                  | 0.77 | F&H (2D-GIST) |
| gij17738257 | FBgn0039555 | 741.04  | 2220.1  | 2220.1  | 0.01  | 0 | 32 | 0.037    | 1 | R.LLVQYEPHEPEFHNISAR.V               | 1.00 | F&H (2D-GIST) |
| gij17738257 | FBgn0039555 | 742.05  | 2223.12 | 2223.12 | 0     | 0 | 31 | 0.043    | 1 | R.LLVQYEPHEPEFHNISAR.V               | 0.96 | R&H (2D-GIST) |
| gij21357743 | FBgn0039566 | 731.91  | 1461.8  | 1461.79 | 0     | 0 | 53 | 0.00029  | 1 | K.ILDGVIANEALHR.G                    | 0.85 | F&H (2D-GIST) |
| gij21357743 | FBgn0039566 | 704.88  | 1407.75 | 1407.75 | 0.01  | 0 | 46 | 0.0014   | 1 | R.IVSGTLHAGQEV.R.V                   | 1.37 | R&L (2D-GIST) |
| gij21357743 | FBgn0039566 | 972.81  | 2915.41 | 2915.39 | 0.02  | 0 | 77 | 7.70E-07 | 1 | R.VEESGEHVILGTGELYLDCVMHDLR.K        | 1.00 | F&H (2D-GIST) |
| gij21357743 | FBgn0039566 | 972.8   | 2915.39 | 2915.39 | 0     | 0 | 55 | 9.90E-05 | 1 | R.VEESGEHVILGTGELYLDCVMHDLR.K        | 0.90 | R&H (2D-GIST) |
| gij24651102 | FBgn0039685 | 612.81  | 1223.61 | 1223.6  | 0     | 0 | 43 | 0.0023   | 1 | K.VHASEELVEK.Y                       | 1.03 | F&H (2D-GIST) |
| gij24651102 | FBgn0039685 | 612.81  | 1223.61 | 1223.6  | 0     | 0 | 43 | 0.0026   | 1 | K.VHASEELVEK.Y                       | 1.12 | R&L (2D-GIST) |
| gij24651102 | FBgn0039685 | 894.91  | 1787.81 | 1787.81 | 0.01  | 0 | 77 | 3.30E-07 | 1 | K.FGFYDTEHGFDVHK.I                   | 0.02 | R&H (2D-GIST) |
| gij24651102 | FBgn0039685 | 1312.62 | 2623.23 | 2623.26 | -0.03 | 1 | 33 | 0.016    | 1 | K.AYHAGMCFMNSNLQLVQHSVKV.-           | 0.92 | R&H (2D-GIST) |
| gij24651102 | FBgn0039685 | 1263.11 | 2524.21 | 2524.19 | 0.02  | 0 | 52 | 0.00031  | 1 | K.AYHAGMCFMNSNLQLVQHSVK.V            | 0.93 | R&H (2D-GIST) |
| gij24651102 | FBgn0039685 | 873.42  | 2617.24 | 2617.22 | 0.02  | 1 | 33 | 0.021    | 1 | K.AYHAGMCFMNSNLQLVQHSVKV.-           | 1.10 | R&L (2D-GIST) |
| gij24651102 | FBgn0039685 | 840.4   | 2518.17 | 2518.16 | 0.01  | 0 | 38 | 0.0043   | 1 | K.AYHAGMCFMNSNLQLVQHSVK.V            | 1.13 | R&L (2D-GIST) |
| gij24651102 | FBgn0039685 | 595.78  | 1189.54 | 1189.54 | 0     | 0 | 46 | 0.00067  | 1 | K.THEDLTNYR.T                        | 0.95 | F&H (2D-GIST) |
| gij24651102 | FBgn0039685 | 597.29  | 1192.56 | 1192.56 | 0     | 0 | 47 | 0.00051  | 1 | K.THEDLTNYR.T                        | 1.25 | R&H (2D-GIST) |
| gij24651102 | FBgn0039685 | 802.74  | 2405.2  | 2405.2  | 0     | 0 | 66 | 1.80E-05 | 1 | K.IHIQLAGPGVEVHESDEVHVK.I            | 0.83 | F&H (2D-GIST) |
| gij24651102 | FBgn0039685 | 1203.61 | 2405.2  | 2405.2  | 0.01  | 0 | 84 | 3.10E-07 | 1 | K.IHIQLAGPGVEVHESDEVHVK.I            | 1.09 | F&H (2D-GIST) |
| gij24651102 | FBgn0039685 | 1203.61 | 2405.2  | 2405.2  | 0.01  | 0 | 87 | 1.30E-07 | 1 | K.IHIQLAGPGVEVHESDEVHVK.I            | 0.76 | R&L (2D-GIST) |
| gij24651102 | FBgn0039685 | 802.74  | 2405.18 | 2405.2  | -0.01 | 0 | 69 | 7.50E-06 | 1 | K.IHIQLAGPGVEVHESDEVHVK.I            | 1.07 | R&L (2D-GIST) |
| gij24651183 | FBgn0039713 | 761.36  | 1520.72 | 1520.71 | 0     | 0 | 53 | 0.0002   | 1 | K.VEQALEDQFTSGR.I                    | 0.63 | F&H (2D-GIST) |
| gij24651183 | FBgn0039713 | 859.95  | 1717.89 | 1717.86 | 0.02  | 0 | 82 | 4.70E-07 | 1 | R.IADVYVYNASNNELVR.T                 | 0.80 | F&H (2D-GIST) |
| gij24651183 | FBgn0039713 | 761.37  | 1520.72 | 1520.71 | 0.01  | 0 | 67 | 8.40E-06 | 1 | K.VEQALEDQFTSGR.I                    | 1.00 | R&L (2D-GIST) |
| gij24651183 | FBgn0039713 | 859.95  | 1717.88 | 1717.86 | 0.02  | 0 | 91 | 6.10E-08 | 1 | R.IADVYVYNASNNELVR.T                 | 1.04 | R&L (2D-GIST) |
| gij38048359 | FBgn0039713 | 837.43  | 1672.86 | 1672.84 | 0.02  | 0 | 54 | 0.00028  | 1 | R.QWYEAHYVPLGR.K                     | 0.38 | F&H (2D-GIST) |
| gij21358615 | FBgn0039737 | 1260.17 | 2518.32 | 2518.31 | 0.01  | 0 | 61 | 4.20E-05 | 1 | K.DGATLQMIGSIPDAVLAALHNHK.D          | 0.98 | R&H (2D-GIST) |
| gij21358615 | FBgn0039737 | 838.44  | 2512.29 | 2512.27 | 0.02  | 0 | 54 | 0.00026  | 1 | K.DGATLQMIGSIPDAVLAALHNHK.D          | 0.89 | R&L (2D-GIST) |
| gij21358615 | FBgn0039737 | 1189.92 | 3566.73 | 3566.69 | 0.04  | 0 | 50 | 0.00033  | 1 | K.QIVKPDVFSIHVSPPDNHYGCSLGTSDVDCVR.A | 0.75 | F&H (2D-GIST) |
| gij21358615 | FBgn0039737 | 1189.91 | 3566.72 | 3566.69 | 0.02  | 0 | 73 | 2.00E-06 | 1 | K.QIVKPDVFSIHVSPPDNHYGCSLGTSDVDCVR.A | 0.85 | R&L (2D-GIST) |
| gij21358615 | FBgn0039737 | 1028.06 | 2054.11 | 2054.09 | 0.02  | 0 | 56 | 0.00015  | 1 | R.AHVHYVVTEHGASLFGK.N                | 0.78 | F&H (2D-GIST) |
| gij21358615 | FBgn0039737 | 683.69  | 2048.05 | 2048.05 | 0.01  | 0 | 43 | 0.0032   | 1 | R.AHVHYVVTEHGASLFGK.N                | 0.74 | F&H (2D-GIST) |
| gij21358615 | FBgn0039737 | 683.69  | 2048.05 | 2048.05 | 0     | 0 | 45 | 0.0021   | 1 | R.AHVHYVVTEHGASLFGK.N                | 0.97 | R&L (2D-GIST) |
| gij21358615 | FBgn0039737 | 1025.03 | 2048.05 | 2048.05 | 0     | 0 | 59 | 9.90E-05 | 1 | R.AHVHYVVTEHGASLFGK.N                | 1.05 | R&L (2D-GIST) |
| gij24651668 | FBgn0039857 | 701.84  | 1401.67 | 1401.67 | 0     | 0 | 57 | 0.00012  | 1 | K.VPEHLNDAYFR.R                      | 0.91 | F&H (2D-GIST) |
| gij24651668 | FBgn0039857 | 703.35  | 1404.69 | 1404.69 | 0     | 0 | 52 | 0.00032  | 1 | K.VPEHLNDAYFR.R                      | 1.04 | R&H (2D-GIST) |
| gij38047817 | FBgn0039857 | 818.5   | 1634.99 | 1634.98 | 0     | 1 | 57 | 1.70E-05 | 1 | R.RNLTPGTVLILLAGR.H                  | 1.23 | R&L (2D-GIST) |

|             |             |         |         |         |       |   |    |          |   |                          |      |               |
|-------------|-------------|---------|---------|---------|-------|---|----|----------|---|--------------------------|------|---------------|
| gij24638644 | FBgn0039909 | 699.35  | 1396.69 | 1396.68 | 0.01  | 0 | 65 | 1.60E-05 | 1 | K.TSMEALIHFFK.L          | 0.99 | F&H (2D-GIST) |
| gij24638644 | FBgn0039909 | 702.37  | 1402.73 | 1402.72 | 0.01  | 0 | 59 | 8.50E-05 | 1 | K.TSMEALIHFFK.L          | 0.80 | R&H (2D-GIST) |
| gij24638644 | FBgn0039909 | 662.02  | 1983.05 | 1983.04 | 0     | 0 | 42 | 0.0036   | 1 | R.NLTLNFGPQHAAHGVLR.L    | 0.78 | F&H (2D-GIST) |
| gij24638644 | FBgn0039909 | 662.02  | 1983.05 | 1983.04 | 0.01  | 0 | 36 | 0.015    | 1 | R.NLTLNFGPQHAAHGVLR.L    | 0.84 | R&L (2D-GIST) |
| gij6752668  | FBgn0040064 | 828.93  | 1655.84 | 1655.84 | 0     | 0 | 57 | 0.00012  | 1 | K.EVDFVVEHPRPK.T         | 1.22 | F&H (2D-GIST) |
| gij6752668  | FBgn0040064 | 881.45  | 1760.88 | 1760.87 | 0.01  | 0 | 32 | 0.054    | 1 | K.LPMALTAENLADQYK.I      | 0.92 | F&H (2D-GIST) |
| gij17648125 | FBgn0040064 | 881.45  | 1760.88 | 1760.87 | 0.01  | 0 | 43 | 0.0035   | 1 | K.LPMALTAENLADQYK.I      | 1.18 | R&L (2D-GIST) |
| gij17648125 | FBgn0040064 | 828.93  | 1655.85 | 1655.84 | 0     | 0 | 67 | 1.10E-05 | 1 | K.EVDFVVEHPRPK.T         | 0.99 | F&H (2D-GIST) |
| gij17648125 | FBgn0040064 | 952.01  | 1902.01 | 1902.01 | 0     | 0 | 95 | 1.50E-08 | 1 | K.LNVNGGAIALGHPLGASGSR.I | 1.05 | F&H (2D-GIST) |
| gij17648125 | FBgn0040064 | 953.53  | 1905.04 | 1905.03 | 0.01  | 0 | 81 | 4.40E-07 | 1 | K.LNVNGGAIALGHPLGASGSR.I | 1.06 | R&H (2D-GIST) |
| gij17648125 | FBgn0040064 | 828.93  | 1655.85 | 1655.84 | 0.01  | 0 | 65 | 2.00E-05 | 1 | K.EVDFVVEHPRPK.T         | 1.18 | R&H (2D-GIST) |
| gij17648125 | FBgn0040064 | 1067.6  | 2133.18 | 2133.16 | 0.01  | 0 | 75 | 1.10E-06 | 1 | R.HVGLNCGVPIEKPALGINR.L  | 1.23 | R&H (2D-GIST) |
| gij17648125 | FBgn0040064 | 710.05  | 2127.13 | 2127.13 | 0.01  | 0 | 47 | 0.001    | 1 | R.HVGLNCGVPIEKPALGINR.L  | 1.35 | R&L (2D-GIST) |
| gij17648125 | FBgn0040064 | 952.02  | 1902.02 | 1902.01 | 0.01  | 0 | 92 | 3.40E-08 | 1 | K.LNVNGGAIALGHPLGASGSR.I | 1.11 | R&L (2D-GIST) |
| gij17648125 | FBgn0040064 | 448.92  | 1343.73 | 1343.73 | 0     | 0 | 49 | 0.0009   | 1 | R.ITGHLVHELQR.K          | 1.10 | F&H (2D-GIST) |
| gij17648125 | FBgn0040064 | 672.87  | 1343.73 | 1343.73 | 0     | 0 | 48 | 0.0011   | 1 | R.ITGHLVHELQR.K          | 1.29 | R&L (2D-GIST) |
| gij17648125 | FBgn0040064 | 448.92  | 1343.73 | 1343.73 | 0     | 0 | 50 | 0.00071  | 1 | R.ITGHLVHELQR.K          | 1.34 | R&L (2D-GIST) |
| gij17737635 | FBgn0040075 | 687.87  | 1373.73 | 1373.73 | 0     | 0 | 30 | 0.064    | 1 | R.SPHGIPIDLLDR.M         | 0.77 | F&H (2D-GIST) |
| gij17737635 | FBgn0040075 | 668.36  | 2002.06 | 2002.05 | 0.01  | 0 | 52 | 0.00037  | 1 | K.EVVHTVTLHEIDVINSR.T    | 1.28 | R&L (2D-GIST) |
| gij22024248 | FBgn0040091 | 875     | 1747.98 | 1747.98 | 0     | 0 | 40 | 0.0044   | 1 | R.NVPILGLPLFQHEAR.N      | 0.82 | R&H (2D-GIST) |
| gij22024248 | FBgn0040091 | 674.37  | 2020.08 | 2020.07 | 0.01  | 0 | 29 | 0.054    | 1 | K.ILVLPFHVNEGHFVVMR.T    | 0.93 | F&H (2D-GIST) |
| gij21358097 | FBgn0040284 | 840.41  | 1678.81 | 1678.81 | 0     | 1 | 41 | 0.0038   | 1 | R.RGPPFAFVEFEDAR.D       | 0.77 | F&H (2D-GIST) |
| gij21358097 | FBgn0040284 | 481.29  | 960.56  | 960.56  | 0     | 1 | 32 | 0.035    | 1 | R.LRVEFP.R.G             | 1.25 | R&H (2D-GIST) |
| gij20128937 | FBgn0040377 | 571.82  | 1141.63 | 1141.62 | 0     | 1 | 29 | 0.1      | 1 | K.DRLPIFPR.G             | 1.01 | F&H (2D-GIST) |
| gij20128937 | FBgn0040377 | 486.96  | 1457.85 | 1457.85 | 0     | 1 | 39 | 0.0021   | 1 | R.RVNAIEHVIIPR.I         | 0.65 | F&H (2D-GIST) |
| gij20128937 | FBgn0040377 | 487.96  | 1460.87 | 1460.87 | 0     | 1 | 31 | 0.022    | 1 | R.RVNAIEHVIIPR.I         | 0.78 | R&H (2D-GIST) |
| gij19922872 | FBgn0040499 | 528.73  | 1055.45 | 1055.45 | 0     | 0 | 33 | 0.0046   | 1 | R.NYYDHFR.D              | 0.67 | F&H (2D-GIST) |
| gij19922872 | FBgn0040499 | 730.03  | 2187.08 | 2187.07 | 0.01  | 0 | 33 | 0.026    | 1 | K.HLQQLTENGHQVVPEER.V    | 1.24 | F&H (2D-GIST) |
| gij19922872 | FBgn0040499 | 729.02  | 2184.05 | 2184.06 | -0.01 | 0 | 42 | 0.0033   | 1 | K.HLQQLTENGHQVVPEER.V    | 0.98 | R&L (2D-GIST) |
| gij24659348 | FBgn0040660 | 710.87  | 1419.72 | 1419.71 | 0     | 1 | 57 | 0.00015  | 1 | R.HKEFLENLHK.-           | 0.93 | F&H (2D-GIST) |
| gij24659348 | FBgn0040660 | 710.86  | 1419.71 | 1419.71 | 0     | 1 | 50 | 0.00067  | 1 | R.HKEFLENLHK.-           | 0.78 | F&H (2D-GIST) |
| gij24659348 | FBgn0040660 | 715.39  | 1428.77 | 1428.77 | 0     | 1 | 57 | 0.00013  | 1 | R.HKEFLENLHK.-           | 1.14 | R&H (2D-GIST) |
| gij17945779 | FBgn0040660 | 1125.09 | 2248.16 | 2248.17 | -0.01 | 1 | 54 | 0.00027  | 1 | R.LKNDQIHQAEFHHQIQK.E    | 0.90 | F&H (2D-GIST) |
| gij17945779 | FBgn0040660 | 978.98  | 1955.94 | 1955.92 | 0.02  | 0 | 55 | 0.00018  | 1 | K.NDQIHQAEFHHQIQK.E      | 0.72 | F&H (2D-GIST) |
| gij17945779 | FBgn0040660 | 747.38  | 2239.11 | 2239.11 | 0     | 1 | 44 | 0.0025   | 1 | R.LKNDQIHQAEFHHQIQK.E    | 0.79 | F&H (2D-GIST) |
| gij17945779 | FBgn0040660 | 652.98  | 1955.93 | 1955.92 | 0     | 0 | 30 | 0.049    | 1 | K.NDQIHQAEFHHQIQK.E      | 0.85 | F&H (2D-GIST) |
| gij17945779 | FBgn0040660 | 981.99  | 1961.96 | 1961.96 | 0     | 0 | 41 | 0.0038   | 1 | K.NDQIHQAEFHHQIQK.E      | 1.03 | R&H (2D-GIST) |
| gij17945779 | FBgn0040660 | 1120.57 | 2239.12 | 2239.11 | 0.01  | 1 | 53 | 0.00033  | 1 | R.LKNDQIHQAEFHHQIQK.E    | 0.93 | R&L (2D-GIST) |
| gij17945779 | FBgn0040660 | 747.38  | 2239.12 | 2239.11 | 0     | 1 | 36 | 0.015    | 1 | R.LKNDQIHQAEFHHQIQK.E    | 1.09 | R&L (2D-GIST) |



|             |             |         |         |         |       |   |    |          |   |                                     |      |               |
|-------------|-------------|---------|---------|---------|-------|---|----|----------|---|-------------------------------------|------|---------------|
| gij17945779 | FBgn0040660 | 652.98  | 1955.93 | 1955.92 | 0     | 0 | 33 | 0.023    | 1 | K.NDQIHQAEFHQOIK.E                  | 1.10 | R&L (2D-GIST) |
| gij17933586 | FBgn0041629 | 842.95  | 1683.88 | 1683.87 | 0.01  | 0 | 63 | 3.90E-05 | 1 | R.FHVVPAGEAATQFLR.E                 | 1.20 | F&H (2D-GIST) |
| gij17933586 | FBgn0041629 | 844.46  | 1686.91 | 1686.89 | 0.01  | 0 | 35 | 0.021    | 1 | R.FHVVPAGEAATQFLR.E                 | 1.52 | R&H (2D-GIST) |
| gij17933586 | FBgn0041629 | 573.8   | 1145.58 | 1145.58 | 0     | 0 | 48 | 0.00081  | 1 | R.LWSQFHQR.N                        | 0.92 | F&H (2D-GIST) |
| gij17933586 | FBgn0041629 | 785.37  | 2353.1  | 2353.11 | -0.01 | 0 | 39 | 0.0052   | 1 | R.GIHADAVIPHWCVLHEGQCL.-            | 1.10 | R&L (2D-GIST) |
| gij17933586 | FBgn0041629 | 819.1   | 2454.29 | 2454.28 | 0.01  | 0 | 40 | 0.0047   | 1 | K.LNLVHWHVVDTHSFPLEITR.V            | 0.48 | R&L (2D-GIST) |
| gij21428670 | FBgn0041630 | 730.38  | 1458.75 | 1458.74 | 0.01  | 0 | 50 | 0.00061  | 1 | R.LWGHFQTEALGR.V                    | 0.86 | R&H (2D-GIST) |
| gij21428670 | FBgn0041630 | 949.51  | 1897    | 1896.99 | 0     | 0 | 60 | 5.80E-05 | 1 | R.HGLETLAQLIVYDDIR.R                | 0.67 | R&L (2D-GIST) |
| gij11321422 | FBgn0041789 | 1078.47 | 2154.92 | 2154.91 | 0.01  | 0 | 91 | 5.60E-09 | 1 | R.DGFPYCEPDYHNLFSR.C                | 1.03 | F&H (2D-GIST) |
| gij14669808 | FBgn0041789 | 940.46  | 1878.91 | 1878.89 | 0.02  | 0 | 78 | 5.70E-07 | 1 | K.AQPQVYQEHYSVETR.S                 | 1.08 | R&H (2D-GIST) |
| gij14669824 | FBgn0041789 | 918.42  | 2752.23 | 2752.22 | 0.01  | 0 | 78 | 2.20E-07 | 1 | R.AIMENYISALNSQWHPDCFVCR.D          | 0.79 | R&L (2D-GIST) |
| gij25012834 | FBgn0050084 | 757.9   | 1513.79 | 1513.78 | 0.01  | 0 | 39 | 0.01     | 1 | R.RPLQDIGFVEEK.G                    | 0.67 | F&H (2D-GIST) |
| gij25012834 | FBgn0050084 | 757.9   | 1513.79 | 1513.78 | 0.01  | 0 | 37 | 0.016    | 1 | R.RPLQDIGFVEEK.G                    | 0.92 | R&L (2D-GIST) |
| gij25012834 | FBgn0050084 | 996.94  | 1991.87 | 1991.86 | 0     | 0 | 51 | 8.80E-05 | 1 | R.IWCPDHFICVNGNCR.R                 | 1.07 | F&H (2D-GIST) |
| gij25012834 | FBgn0050084 | 995.43  | 1988.85 | 1988.84 | 0.01  | 0 | 47 | 0.00023  | 1 | R.IWCPDHFICVNGNCR.R                 | 0.93 | R&L (2D-GIST) |
| gij25012834 | FBgn0050084 | 924.87  | 1847.72 | 1847.72 | 0.01  | 0 | 61 | 1.20E-06 | 1 | K.HFHPECFTCGQCGK.I                  | 2.05 | R&L (2D-GIST) |
| gij22024201 | FBgn0050122 | 1078    | 2153.98 | 2153.97 | 0.01  | 0 | 95 | 7.00E-09 | 1 | K.SLLLLGEAEHSFGYCETGR.K             | 0.99 | F&H (2D-GIST) |
| gij22024201 | FBgn0050122 | 778.42  | 1554.83 | 1554.82 | 0.01  | 0 | 64 | 2.30E-05 | 1 | K.VGLSWLDSDLHLR.I                   | 0.81 | F&H (2D-GIST) |
| gij22024201 | FBgn0050122 | 868.4   | 1734.79 | 1734.78 | 0     | 0 | 58 | 4.60E-05 | 1 | R.LSEESVPENSHYFR.D                  | 0.88 | F&H (2D-GIST) |
| gij22024201 | FBgn0050122 | 869.91  | 1737.81 | 1737.8  | 0.01  | 0 | 33 | 0.012    | 1 | R.LSEESVPENSHYFR.D                  | 0.63 | R&H (2D-GIST) |
| gij22024201 | FBgn0050122 | 778.42  | 1554.83 | 1554.82 | 0.01  | 0 | 58 | 0.00011  | 1 | K.VGLSWLDSDLHLR.I                   | 1.08 | R&H (2D-GIST) |
| gij17861652 | FBgn0050359 | 775.38  | 1548.74 | 1548.74 | 0     | 0 | 29 | 0.069    | 1 | R.TANWVLGNHDQPR.V                   | 1.23 | F&H (2D-GIST) |
| gij17861652 | FBgn0050359 | 628.29  | 1254.56 | 1254.55 | 0     | 0 | 45 | 0.00047  | 1 | R.GSAWQWHEGR.Q                      | 1.43 | F&H (2D-GIST) |
| gij28571736 | FBgn0051302 | 1027.81 | 3080.41 | 3080.44 | -0.03 | 0 | 32 | 0.014    | 1 | R.AVGQHAANVGQTGGAGRPGQEEAPGAYADFR.T | 0.79 | F&H (2D-GIST) |
| gij28571736 | FBgn0051302 | 1027.82 | 3080.45 | 3080.44 | 0     | 0 | 62 | 2.20E-05 | 1 | R.AVGQHAANVGQTGGAGRPGQEEAPGAYADFR.T | 1.00 | R&L (2D-GIST) |
| gij28571736 | FBgn0051302 | 499.27  | 1494.8  | 1494.8  | 0     | 0 | 35 | 0.021    | 1 | R.ALIEGVDSTRPHR.I                   | 1.11 | F&H (2D-GIST) |
| gij24638815 | FBgn0052017 | 769.38  | 1536.76 | 1536.75 | 0     | 0 | 55 | 0.00016  | 1 | K.TEEASHIVNPSGVR.T                  | 0.91 | F&H (2D-GIST) |
| gij24638815 | FBgn0052017 | 767.37  | 1532.73 | 1532.72 | 0     | 0 | 33 | 0.025    | 1 | R.LGEFGSSASGLSHSR.Y                 | 1.12 | F&H (2D-GIST) |
| gij24661073 | FBgn0052029 | 631.87  | 1261.72 | 1261.71 | 0     | 1 | 44 | 0.0024   | 1 | R.IKDTVAEQIR.A                      | 0.62 | F&H (2D-GIST) |
| gij24661073 | FBgn0052029 | 820.04  | 2457.09 | 2457.08 | 0.01  | 0 | 35 | 0.0046   | 1 | K.QQYQHQQQQQYHYQ.-                  | 0.94 | F&H (2D-GIST) |
| gij24661073 | FBgn0052029 | 1407.69 | 2813.37 | 2813.37 | 0     | 0 | 33 | 0.02     | 1 | R.DYQQYQPQQAAYRPPAQAAPQPPR.R        | 0.76 | R&H (2D-GIST) |
| gij24661073 | FBgn0052029 | 989.83  | 2966.47 | 2966.45 | 0.02  | 1 | 44 | 0.0019   | 1 | R.DYQQYQPQQAAYRPPAQAAPQPPR.I        | 0.99 | F&H (2D-GIST) |
| gij28574664 | FBgn0053113 | 669.86  | 1337.7  | 1337.69 | 0     | 0 | 74 | 2.00E-06 | 1 | K.QSIDTHLIDLVR.S                    | 0.62 | F&H (2D-GIST) |
| gij28574664 | FBgn0053113 | 671.37  | 1340.72 | 1340.71 | 0     | 0 | 64 | 2.30E-05 | 1 | K.QSIDTHLIDLVR.S                    | 0.70 | R&H (2D-GIST) |
| gij28574664 | FBgn0053113 | 1077.11 | 2152.2  | 2152.18 | 0.02  | 0 | 66 | 9.00E-06 | 1 | K.VQNIAGVAVAHINGFISELR.R            | 0.77 | R&H (2D-GIST) |
| gij28574664 | FBgn0053113 | 717.4   | 2149.17 | 2149.16 | 0.01  | 0 | 70 | 3.40E-06 | 1 | K.VQNIAGVAVAHINGFISELR.R            | 0.77 | R&L (2D-GIST) |
| gij28574664 | FBgn0053113 | 791.92  | 1581.83 | 1581.83 | 0     | 0 | 69 | 8.10E-06 | 1 | R.LHPQVESLIYWR.D                    | 0.99 | F&H (2D-GIST) |
| gij28574664 | FBgn0053113 | 793.43  | 1584.86 | 1584.85 | 0.01  | 0 | 69 | 9.00E-06 | 1 | R.LHPQVESLIYWR.D                    | 1.01 | R&H (2D-GIST) |
| gij28574664 | FBgn0053113 | 769.43  | 2305.28 | 2305.27 | 0.01  | 1 | 31 | 0.02     | 1 | K.VQNIAGVAVAHINGFISELRR.L           | 0.73 | R&L (2D-GIST) |

|             |             |         |         |         |       |   |    |          |   |                                    |      |               |
|-------------|-------------|---------|---------|---------|-------|---|----|----------|---|------------------------------------|------|---------------|
| gil28573410 | FBgn0053138 | 852.41  | 1702.81 | 1702.82 | 0     | 0 | 51 | 0.00031  | 1 | R.IYECHVGIASQEPR.V                 | 0.53 | F&H (2D-GIST) |
| gil17861974 | FBgn0053138 | 1033.51 | 3097.52 | 3097.53 | -0.01 | 0 | 44 | 0.0019   | 1 | R.IITIAEDVSGMPTLCRPVSEGGIGFDYR.L   | 0.29 | R&H (2D-GIST) |
| gil28573410 | FBgn0053138 | 852.42  | 1702.82 | 1702.82 | 0.01  | 0 | 42 | 0.0025   | 1 | R.IYECHVGIASQEPR.V                 | 0.68 | R&H (2D-GIST) |
| gil28573410 | FBgn0053138 | 688.68  | 2063.01 | 2063.01 | 0     | 0 | 37 | 0.012    | 1 | K.LFETDGYLRPFEHEIR.R               | 0.55 | F&H (2D-GIST) |
| gil28573410 | FBgn0053138 | 599.3   | 1794.88 | 1794.88 | 0     | 0 | 42 | 0.0043   | 1 | K.HYGLHFQPDNSVIAR.E                | 0.62 | F&H (2D-GIST) |
| gil28573410 | FBgn0053138 | 689.69  | 2066.04 | 2066.03 | 0.01  | 0 | 32 | 0.04     | 1 | K.LFETDGYLRPFEHEIR.R               | 0.59 | R&H (2D-GIST) |
| gil28573410 | FBgn0053138 | 600.31  | 1797.9  | 1797.9  | 0     | 0 | 45 | 0.0017   | 1 | K.HYGLHFQPDNSVIAR.E                | 0.69 | R&H (2D-GIST) |
| gil24581873 | FBgn0053715 | 761.4   | 1520.79 | 1520.78 | 0.01  | 0 | 47 | 0.0013   | 1 | R.SLVASLPHELEER.E                  | 0.70 | F&H (2D-GIST) |
| gil24581873 | FBgn0053715 | 762.91  | 1523.81 | 1523.8  | 0.01  | 0 | 50 | 0.00057  | 1 | R.SLVASLPHELEER.E                  | 0.70 | R&H (2D-GIST) |
| gil24581873 | FBgn0053715 | 671.89  | 1341.76 | 1341.76 | 0     | 0 | 51 | 0.00037  | 1 | R.IGQFVTHLVQR.Y                    | 0.81 | F&H (2D-GIST) |
| gil24581873 | FBgn0053715 | 670.38  | 1338.75 | 1338.74 | 0.01  | 0 | 56 | 0.00012  | 1 | R.IGQFVTHLVQR.Y                    | 0.97 | R&L (2D-GIST) |
| gil24581873 | FBgn0053715 | 1119.94 | 3356.8  | 3356.78 | 0.03  | 0 | 39 | 0.0027   | 1 | K.QAQGELLVEHLVHTGEVVLASTSAQGQEIR.N | 1.13 | F&H (2D-GIST) |
| gil24581873 | FBgn0053715 | 651.65  | 1951.93 | 1951.93 | 0     | 0 | 37 | 0.0095   | 1 | K.FHALEHNFGQALQENR.A               | 0.48 | F&H (2D-GIST) |
| gil24581873 | FBgn0053715 | 708.71  | 2123.11 | 2123.1  | 0.01  | 0 | 32 | 0.029    | 1 | R.VETSLHVIHALLQEHADK.K             | 0.96 | F&H (2D-GIST) |
| gil24581873 | FBgn0053715 | 839.76  | 2516.25 | 2516.24 | 0.01  | 0 | 70 | 5.60E-06 | 1 | K.EIHQWLSEAEQLLGTNLSGGR.D          | 0.92 | R&L (2D-GIST) |
| gil24581873 | FBgn0053715 | 708.71  | 2123.12 | 2123.1  | 0.01  | 0 | 44 | 0.002    | 1 | R.VETSLHVIHALLQEHADK.K             | 1.02 | R&L (2D-GIST) |
| gil30923745 | FBgn0058160 | 792.41  | 1582.81 | 1582.81 | 0     | 0 | 28 | 0.11     | 1 | R.SVQTVILHPDYNR.R                  | 0.80 | F&H (2D-GIST) |
| gil30923745 | FBgn0058160 | 929.48  | 1856.95 | 1856.96 | 0     | 1 | 44 | 0.0031   | 1 | K.RVPLPIVEFNQCQTR.L                | 1.08 | F&H (2D-GIST) |
| gil30923745 | FBgn0058160 | 793.92  | 1585.84 | 1585.83 | 0.01  | 0 | 28 | 0.098    | 1 | R.SVQTVILHPDYNR.R                  | 1.52 | R&H (2D-GIST) |
| gil30923745 | FBgn0058160 | 929.48  | 1856.95 | 1856.96 | 0     | 1 | 62 | 4.20E-05 | 1 | K.RVPLPIVEFNQCQTR.L                | 1.24 | R&L (2D-GIST) |
| gil25013110 | FBgn0064779 | 494.8   | 987.58  | 987.58  | 0.01  | 0 | 48 | 0.0012   | 1 | K.ELGVGLVTR.K                      | 0.76 | F&H (2D-GIST) |
| gil25013110 | FBgn0064779 | 762.87  | 1523.72 | 1523.72 | 0     | 0 | 52 | 0.00017  | 1 | K.LGVFDEETLDGR.N                   | 0.98 | R&H (2D-GIST) |
| gil25013110 | FBgn0064779 | 493.29  | 984.57  | 984.56  | 0.01  | 0 | 54 | 0.00043  | 1 | K.ELGVGLVTR.K                      | 0.92 | R&L (2D-GIST) |
| gil19920756 | FBgn0067992 | 934.55  | 1867.09 | 1867.08 | 0.01  | 1 | 48 | 0.00031  | 1 | R.KDPNTHLIFLPTLLR.W                | 0.97 | R&H (2D-GIST) |
| gil19920756 | FBgn0067992 | 613.65  | 1837.94 | 1837.93 | 0     | 1 | 33 | 0.033    | 1 | K.KAPGNSHFVHVDVGER.A               | 0.93 | F&H (2D-GIST) |
| gil19920756 | FBgn0067992 | 916.95  | 1831.9  | 1831.9  | 0     | 1 | 63 | 3.30E-05 | 1 | K.KAPGNSHFVHVDVGER.A               | 0.92 | F&H (2D-GIST) |
| gil19920756 | FBgn0067992 | 919.98  | 1837.94 | 1837.93 | 0     | 1 | 47 | 0.0013   | 1 | K.KAPGNSHFVHVDVGER.A               | 0.82 | R&H (2D-GIST) |
| gil19920756 | FBgn0067992 | 611.64  | 1831.9  | 1831.9  | 0     | 1 | 42 | 0.0043   | 1 | K.KAPGNSHFVHVDVGER.A               | 0.88 | R&L (2D-GIST) |

<sup>a</sup> NCBI accession nos. were obtained from National Center for Biotechnology Information nonredundant *Drosophila* database.

<sup>b</sup> FlyBase IDs were obtained from the FlyBase database ([www.flybase.org](http://www.flybase.org)).

<sup>c</sup> Descriptive titles were obtained directly from Mascot ([www.matrixscience.com](http://www.matrixscience.com)) results.

<sup>d</sup> Peptides are unique tryptic peptides with the primary amino groups (i.e., amino-terminus and lysine residues) acetylated in the isotope labeling experiments.

<sup>e</sup> Ratios were computed using peak intensities from extracted ion chromatograms of light- and heavy-labeled peptides in the isotope labeling approach. Refer to experimental procedures for details. Peak areas were shown for the peptides identified in each sample for the label-free approach.

<sup>f</sup> Modification type of the corresponding peptides identified in the isotope-labeling approach was indicated with L (light-labeled) and H (heavy-labeled). F indicates that the peptide was detected in the forward labeling experiment (the first biological replicate) and R indicates that it was detected in the reverse labeling experiment (the second biological replicate). Refer to the text for the three approaches utilized for relative protein quantification.
